# Supplementary material for: Chromatin accessibility dynamics across C. elegans development and ageing
Source: eLife journal article supplement (doi:10.7554/elife.37344), 2018-10-26
Supplement: supp [file elife-37344-supp-v1.zip]

Figure 2 - figure supplement 5

A

| unassigned promoter type | n    | %    |
|--------------------------|------|------|
| uaRNA/PROMPT             | 1244 | 41.1 |
| antisense to coding gene | 1057 | 34.9 |
| intergenic               | 579  | 19.1 |
| other                    | 146  | 4.8  |

B

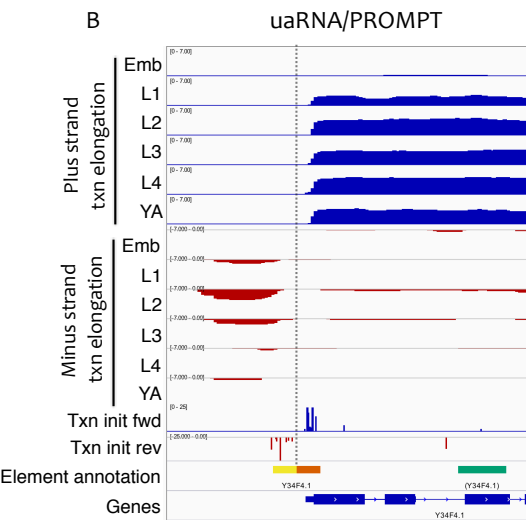

C

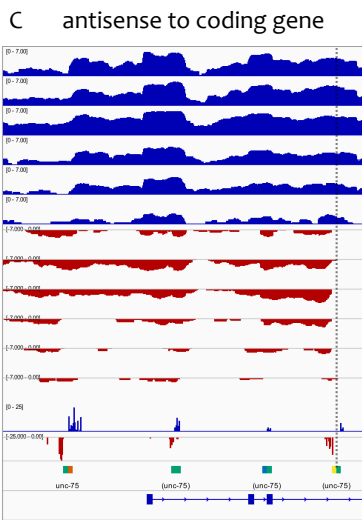

D

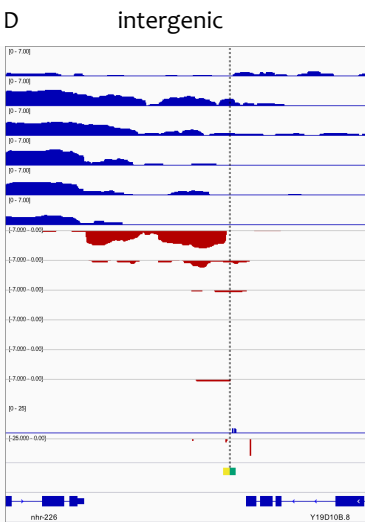

■ coding promoter 
 ■ pseudogene promoter 
 ■ unassigned promoter 
 ■ transcription initiation 
 ■ no activity
