# Supplementary material for: Chromatin accessibility dynamics across C. elegans development and ageing
Source: eLife journal article supplement (doi:10.7554/elife.37344), 2018-10-26
Supplement: supp [file elife-37344-supp-v1.zip]

Archive with 18 entries (18 files):
- elife_poa_e37344_Figure_3_figure_supplement_1.pdf
- elife_poa_e37344_Figure_2_figure_supplement_2.pdf
- elife_poa_e37344_Figure_2_figure_supplement_1.pdf
- elife_poa_e37344_Figure_5_source_data_1.txt
- elife_poa_e37344_Figure_1_figure_supplement_2.pdf
- elife_poa_e37344_Figure_1_source_data_1.txt
- elife_poa_e37344_Figure_2_figure_supplement_6.pdf
- elife_poa_e37344_Figure_1_figure_supplement_3.pdf
- elife_poa_e37344_Figure_1_figure_supplement_1.pdf
- elife_poa_e37344_Figure_2_figure_supplement_3.pdf
- elife_poa_e37344_Figure_2_source_data_1.txt
- elife_poa_e37344_Figure_2_figure_supplement_5.pdf
- elife_poa_e37344_Figure_4_figure_supplement_3.pdf
- elife_poa_e37344_Figure_2_figure_supplement_4.pdf
- elife_poa_e37344_Figure_4_figure_supplement_2.pdf
- elife_poa_e37344_Transparent_Reporting_File.docx
- elife_poa_e37344_Figure_4_source_data_1.txt
- elife_poa_e37344_Figure_4_figure_supplement_1.pdf
