# Supplementary material for: Chromatin accessibility dynamics across C. elegans development and ageing
Source: eLife journal article supplement (doi:10.7554/elife.37344), 2018-10-26
Supplement: supp [file elife-37344-supp-v1.zip › elife_poa_e37344_Figure_1_source_data_1.txt]

chrom	start	end	atac_wt_emb_height	atac_wt_l1_height	atac_wt_l2_height	atac_wt_l3_height	atac_wt_l4_height	atac_wt_ya_height	atac_glp1_d1_height	atac_glp1_d2_height	atac_glp1_d6_height	atac_glp1_d9_height	atac_glp1_d13_height	atac_source
chrI	1900	2051	1.49	1.44	1.23	1.48	1.18	3.03	0.98	0.91	1.16	1.19	1.63	atac_wt_se
chrI	3826	3977	67.20	58.45	74.42	133.74	179.79	211.37	88.03	69.67	68.51	64.59	55.76	atac_wt_pe
chrI	4276	4427	1.58	2.66	2.19	3.50	5.87	7.77	1.80	1.33	1.55	2.07	1.81	atac_wt_se
chrI	11272	11423	2.61	4.44	9.83	10.70	11.68	13.93	20.86	16.74	17.59	15.86	17.17	atac_wt_pe
chrI	13070	13221	5.56	3.61	3.98	3.40	2.69	2.95	2.05	2.08	1.99	2.59	3.20	atac_wt_pe
chrI	15430	15581	1.90	2.26	3.62	6.12	7.22	14.82	10.11	4.92	5.84	6.11	6.39	atac_wt_pe
chrI	15722	15873	1.69	1.76	0.81	3.65	4.25	24.75	1.93	1.08	1.16	1.44	2.25	atac_wt_pe
chrI	16958	17109	25.06	17.81	11.96	22.98	19.72	22.07	24.31	20.91	22.12	25.73	22.04	atac_wt_pe
chrI	22266	22417	1.37	1.36	1.22	1.35	1.03	2.26	5.23	3.41	3.63	4.00	2.19	atac_wt_pe
chrI	22895	23046	1.15	1.36	1.23	1.15	1.20	1.64	0.90	0.92	0.85	0.76	0.72	atac_wt_pe
chrI	24452	24603	1.11	1.49	0.61	0.90	1.11	1.34	5.28	3.87	3.81	3.06	2.18	atac_glp1_se
chrI	26902	27053	3.65	7.93	5.35	13.51	15.41	15.82	8.41	6.34	10.60	13.52	13.20	atac_wt_pe
chrI	27082	27233	8.49	16.49	10.13	24.46	23.60	24.27	17.74	14.09	18.56	23.41	21.35	atac_wt_pe
chrI	28163	28314	1.24	1.72	1.57	1.78	1.87	2.99	1.33	1.08	1.42	1.61	1.49	atac_wt_pe
chrI	30271	30422	2.87	2.33	2.20	1.81	3.16	2.58	1.31	2.01	2.16	2.12	1.77	atac_wt_se
chrI	31958	32109	2.54	2.22	2.31	1.87	2.08	2.73	2.90	4.73	5.06	3.48	2.59	atac_glp1_se
chrI	33340	33491	3.55	2.07	2.72	3.28	2.86	3.11	3.76	5.29	3.97	4.12	4.89	atac_wt_pe
chrI	33764	33915	9.31	4.17	8.69	9.82	18.67	15.58	36.05	47.34	43.69	40.10	30.26	atac_wt_pe
chrI	34239	34390	1.33	2.24	1.67	1.97	1.99	2.67	3.04	3.55	3.19	3.57	2.83	atac_glp1_se
chrI	34626	34777	1.64	3.21	2.92	3.71	3.25	3.73	9.35	10.85	8.84	9.62	10.18	atac_wt_pe
chrI	35381	35532	25.33	15.98	21.37	16.69	14.60	8.93	12.85	13.80	10.71	15.13	16.17	atac_wt_pe
chrI	36018	36169	0.93	1.59	1.10	1.10	1.71	4.35	11.74	6.40	8.78	9.19	7.29	atac_wt_pe
chrI	36471	36622	1.11	1.45	1.58	1.87	2.86	4.92	9.51	6.36	9.40	9.45	7.55	atac_wt_pe
chrI	37988	38139	2.10	1.91	2.42	1.81	2.41	2.09	2.56	2.68	3.34	3.92	4.22	atac_glp1_se
chrI	38986	39137	1.27	3.01	4.12	4.48	5.48	6.45	15.94	10.72	13.59	12.30	11.02	atac_wt_pe
chrI	39776	39927	20.24	52.51	60.96	54.04	53.37	36.11	77.57	67.64	75.12	70.64	72.00	atac_wt_pe
chrI	40327	40478	2.95	5.98	6.92	4.55	3.96	3.33	4.94	4.37	3.71	5.28	5.39	atac_wt_pe
chrI	40869	41020	1.21	2.56	2.29	2.84	3.81	4.57	4.96	7.28	9.32	6.53	6.39	atac_wt_pe
chrI	41422	41573	2.28	3.39	4.57	2.73	2.65	3.06	2.90	3.37	2.52	3.20	2.80	atac_wt_se
chrI	42126	42277	15.68	18.21	31.08	35.21	42.67	30.53	61.65	41.07	39.93	32.92	26.56	atac_wt_pe
chrI	42692	42843	2.25	2.00	2.38	2.23	2.27	2.81	4.37	3.66	3.74	3.32	3.34	atac_glp1_se
chrI	43008	43159	8.87	7.57	7.19	9.98	8.22	7.45	16.02	7.38	10.14	8.29	6.90	atac_wt_pe
chrI	44817	44968	1.62	1.62	1.50	2.17	2.68	2.32	4.27	2.37	2.42	2.39	1.78	atac_glp1_se
chrI	45122	45273	1.29	1.60	1.48	2.19	2.04	3.94	9.79	3.69	5.16	4.86	3.44	atac_wt_pe
chrI	46405	46556	0.92	1.48	0.82	1.12	1.25	1.60	1.84	1.55	1.56	1.36	1.49	atac_glp1_se
chrI	46676	46827	2.49	2.23	1.46	1.90	2.38	3.21	1.03	1.29	1.22	1.27	1.29	atac_wt_se
chrI	47053	47204	6.70	4.44	2.63	5.87	6.95	9.91	3.40	2.81	2.59	3.18	3.79	atac_wt_pe
chrI	47460	47611	3.37	2.34	2.15	3.17	3.87	4.68	2.07	1.94	1.68	1.97	1.44	atac_wt_pe
chrI	56726	56877	3.87	3.41	3.15	2.37	2.64	2.09	1.09	1.15	0.97	0.73	0.96	atac_wt_se
chrI	65751	65902	6.72	9.72	6.22	6.86	5.99	6.11	6.80	5.96	3.56	3.48	4.64	atac_wt_pe
chrI	67780	67931	3.86	2.37	1.75	1.69	2.12	2.26	2.81	4.20	3.67	3.58	3.28	atac_wt_pe
chrI	70044	70195	169.41	115.00	140.56	159.23	120.66	80.39	149.84	129.89	151.24	144.64	128.01	atac_wt_pe
chrI	71234	71385	3.07	2.40	2.03	2.12	2.29	1.78	1.16	1.28	1.29	1.57	1.77	atac_wt_pe
chrI	71851	72002	0.74	1.20	1.14	1.41	1.57	2.05	1.67	2.24	2.29	1.79	3.03	atac_glp1_se
chrI	72362	72513	0.79	0.83	0.71	1.27	1.65	3.22	0.26	0.34	0.49	0.56	0.55	atac_wt_se
chrI	74706	74857	3.88	2.27	2.81	3.46	5.05	3.09	5.85	6.30	11.15	12.05	14.50	atac_wt_pe
chrI	75217	75368	0.93	1.50	1.41	1.07	1.23	1.43	2.35	3.03	5.97	6.53	9.07	atac_glp1_se
chrI	86364	86515	22.59	18.72	16.99	16.71	14.70	13.73	25.28	20.37	17.42	16.63	15.19	atac_wt_pe
chrI	90438	90589	2.35	2.51	1.90	1.88	1.69	2.05	1.34	1.86	1.82	1.57	1.52	atac_wt_se
chrI	91353	91504	1.84	1.52	1.29	1.70	1.88	3.02	7.92	6.71	7.70	6.54	4.40	atac_glp1_se
chrI	91714	91865	2.01	1.66	1.53	1.35	1.95	2.47	3.87	4.48	4.56	4.71	3.24	atac_glp1_se
chrI	92221	92372	1.27	1.26	1.18	1.28	2.63	4.03	1.49	1.62	1.89	1.58	1.88	atac_wt_pe
chrI	92875	93026	1.37	1.62	1.00	3.25	5.34	8.22	2.52	3.02	2.86	3.12	2.83	atac_wt_pe
chrI	96523	96674	2.75	3.02	2.97	2.95	2.60	3.65	3.70	3.33	2.96	3.49	3.39	atac_glp1_se
chrI	98075	98226	0.69	1.34	0.81	1.05	1.09	1.30	3.51	2.93	2.13	2.02	1.64	atac_glp1_se
chrI	108262	108413	57.89	34.34	33.52	48.47	44.28	31.44	65.79	47.76	54.63	52.50	51.37	atac_wt_pe
chrI	109603	109754	2.99	4.15	4.09	4.60	6.09	5.63	4.17	6.67	7.00	5.76	5.54	atac_wt_se
chrI	110120	110271	3.66	6.55	7.90	11.18	21.72	14.54	32.97	43.83	49.69	46.60	37.24	atac_wt_pe
chrI	110331	110482	5.51	6.21	6.95	11.30	20.88	15.37	17.75	27.57	47.91	46.10	44.47	atac_glp1_se
chrI	110635	110786	38.62	35.74	40.19	55.09	67.26	54.63	54.09	59.42	70.03	67.65	57.91	atac_wt_pe
chrI	111206	111357	1.91	4.08	2.46	2.71	5.37	7.44	1.65	2.17	2.44	2.49	2.41	atac_wt_pe
chrI	112379	112530	2.37	2.94	2.55	3.95	5.27	8.90	1.75	1.80	2.33	3.22	2.84	atac_wt_se
chrI	112713	112864	1.80	3.12	2.12	2.29	3.55	5.69	1.47	1.55	2.16	2.49	2.33	atac_wt_se
chrI	114694	114845	1.17	1.06	0.81	1.32	1.72	2.64	0.66	0.77	0.93	0.87	1.21	atac_wt_se
chrI	122407	122558	5.35	3.08	5.28	4.03	3.17	2.22	2.36	3.11	2.32	2.99	2.89	atac_wt_pe
chrI	123900	124051	5.01	3.43	3.07	2.19	1.39	1.88	0.87	1.15	1.02	1.16	1.54	atac_wt_pe
chrI	124768	124919	11.60	3.36	2.30	1.87	1.79	2.75	1.17	1.70	3.77	5.08	10.30	atac_wt_pe
chrI	126632	126783	3.37	2.64	3.75	2.06	1.73	1.80	0.82	0.88	0.97	1.61	1.62	atac_wt_pe
chrI	128237	128388	4.42	2.24	2.46	5.25	12.93	18.98	0.84	1.11	0.58	0.44	0.78	atac_wt_pe
chrI	128403	128554	12.49	4.10	4.05	4.77	4.69	10.71	1.87	1.52	1.08	1.16	1.50	atac_wt_pe
chrI	128676	128827	6.32	2.29	2.23	2.01	2.24	4.07	0.86	0.78	0.66	0.61	1.01	atac_wt_pe
chrI	129895	130046	5.38	6.13	3.75	3.18	3.56	2.89	2.37	2.06	2.37	2.07	3.23	atac_wt_pe
chrI	130436	130587	11.75	7.88	6.50	4.47	3.40	3.05	2.06	2.65	1.88	2.74	3.60	atac_wt_se
chrI	130843	130994	24.56	3.89	5.12	4.41	3.35	2.96	1.00	1.60	1.05	1.01	1.09	atac_wt_pe
chrI	134015	134166	4.16	2.46	1.87	1.67	1.74	3.28	1.02	1.41	0.93	0.95	1.26	atac_wt_pe
chrI	134218	134369	5.18	3.87	3.23	2.71	2.00	4.13	1.64	1.60	1.33	1.88	1.74	atac_wt_pe
chrI	144716	144867	2.86	1.85	2.03	1.25	1.15	1.44	1.55	1.79	1.73	1.73	2.06	atac_wt_se
chrI	153759	153910	3.69	2.25	1.81	2.29	1.88	1.55	1.70	1.65	1.98	1.93	2.17	atac_wt_se
chrI	154098	154249	1.44	1.56	1.37	1.92	2.07	1.53	2.57	2.42	3.10	2.97	3.40	atac_glp1_se
chrI	156031	156182	6.93	7.23	9.66	10.90	15.83	7.92	14.25	13.48	12.73	11.06	10.13	atac_wt_pe
chrI	159357	159508	6.58	4.79	8.14	7.22	4.52	6.95	10.74	10.77	8.38	7.98	7.80	atac_wt_pe
chrI	160122	160273	2.47	2.74	1.99	1.94	1.51	1.60	5.49	4.38	4.89	5.11	5.92	atac_glp1_se
chrI	160806	160957	1.82	2.48	2.52	2.62	1.79	2.11	1.86	2.28	2.32	2.43	2.60	atac_wt_se
chrI	165888	166039	1.16	2.77	2.76	2.65	2.00	2.18	3.08	3.39	3.21	3.17	2.63	atac_wt_pe
chrI	166970	167121	6.00	4.76	5.66	11.95	8.88	3.38	4.53	5.19	5.92	6.65	7.75	atac_wt_pe
chrI	168012	168163	3.25	2.66	2.25	3.85	3.66	1.84	1.41	1.94	1.92	2.26	2.37	atac_wt_pe
chrI	168681	168832	2.15	2.97	2.95	4.45	4.29	2.40	2.86	2.84	5.32	5.53	7.59	atac_wt_se
chrI	169733	169884	5.09	3.95	3.39	3.50	3.79	1.78	1.67	1.90	1.77	2.18	2.64	atac_wt_pe
chrI	170648	170799	0.93	1.50	0.90	1.81	3.13	1.36	1.52	1.27	1.41	1.25	1.41	atac_wt_pe
chrI	171122	171273	0.84	1.86	1.90	4.25	4.24	5.22	12.12	7.48	9.77	8.12	6.22	atac_wt_pe
chrI	171775	171926	3.19	3.27	2.74	2.77	2.54	1.89	1.44	1.88	2.50	2.67	2.04	atac_wt_se
chrI	172087	172238	3.06	3.57	3.14	4.13	3.65	3.06	4.92	3.49	5.37	5.19	6.87	atac_wt_pe
chrI	172376	172527	1.33	2.72	2.18	4.18	4.84	3.90	5.64	10.37	17.62	16.95	22.55	atac_wt_pe
chrI	172819	172970	8.93	8.03	13.41	23.01	25.91	17.48	20.25	36.48	48.79	40.37	41.40	atac_wt_pe
chrI	173207	173358	6.82	2.90	2.99	3.28	3.12	2.73	1.85	2.98	3.40	3.38	4.30	atac_wt_pe
chrI	176780	176931	2.31	1.67	2.11	2.04	4.80	1.90	1.39	1.85	2.83	3.04	4.14	atac_wt_pe
chrI	177363	177514	3.02	3.69	3.66	8.33	13.43	8.19	17.74	15.92	17.30	13.63	13.14	atac_wt_pe
chrI	178073	178224	3.47	2.59	2.64	2.90	3.40	2.21	1.56	1.77	1.89	1.93	2.04	atac_wt_se
chrI	178419	178570	5.00	3.11	2.05	5.19	6.97	2.57	1.73	2.03	2.02	1.60	1.88	atac_wt_pe
chrI	179271	179422	4.96	5.26	2.25	6.89	9.41	3.62	4.61	4.98	4.67	4.07	4.29	atac_wt_pe
chrI	180176	180327	17.55	14.11	15.98	16.31	20.85	15.11	13.80	14.48	14.39	12.08	13.25	atac_wt_pe
chrI	182144	182295	2.24	2.95	2.10	3.40	3.95	3.76	3.22	3.71	5.70	3.61	2.94	atac_wt_se
chrI	182927	183078	14.57	11.20	4.99	14.92	10.62	11.83	14.53	9.51	10.85	13.88	15.98	atac_wt_pe
chrI	183261	183412	2.08	2.34	1.90	2.96	3.28	4.26	4.97	3.03	4.32	3.30	3.81	atac_glp1_se
chrI	183416	183567	1.98	2.21	1.29	2.03	2.73	2.93	2.27	1.79	1.89	1.64	1.98	atac_wt_pe
chrI	184785	184936	0.83	1.57	0.64	2.73	1.98	3.88	3.62	1.48	2.36	4.15	6.12	atac_wt_pe
chrI	188566	188717	1.49	1.89	2.17	2.39	3.19	3.81	1.83	0.96	0.94	0.74	1.07	atac_wt_pe
chrI	196825	196976	0.18	0.58	0.30	0.55	0.43	1.04	0.22	0.14	0.40	0.35	0.24	atac_wt_pe
chrI	202163	202314	2.69	1.81	1.76	2.20	1.74	2.71	1.74	1.89	2.09	2.49	2.74	atac_glp1_se
chrI	204401	204552	1.91	1.66	1.38	2.28	0.99	1.62	0.84	1.17	2.61	2.03	3.15	atac_glp1_se
chrI	206007	206158	1.63	1.48	1.00	1.57	1.13	1.76	0.73	0.84	0.68	0.66	0.95	atac_wt_pe
chrI	215667	215818	0.18	0.36	0.13	0.34	0.62	2.68	0.11	0.08	0.12	0.11	0.03	atac_wt_pe
chrI	215836	215987	0.38	0.58	0.36	1.25	3.05	6.12	0.12	0.23	0.17	0.27	0.22	atac_wt_pe
chrI	217734	217885	0.22	0.55	0.18	0.35	0.74	1.19	0.31	0.38	0.25	0.21	0.23	atac_wt_se
chrI	226835	226986	1.41	0.68	0.57	0.63	0.71	1.21	0.45	0.40	0.44	0.51	0.32	atac_wt_pe
chrI	230511	230662	9.41	4.34	5.67	4.22	4.85	5.16	2.19	2.66	1.97	2.35	2.31	atac_wt_pe
chrI	231335	231486	7.09	2.09	2.17	1.80	3.02	3.77	6.39	6.08	4.67	4.76	3.79	atac_wt_pe
chrI	231966	232117	4.29	4.49	4.95	4.59	4.07	5.70	2.15	3.12	2.16	2.52	3.22	atac_wt_pe
chrI	232644	232795	1.54	1.30	1.06	1.44	2.33	2.62	1.01	1.36	1.22	1.08	1.21	atac_wt_pe
chrI	237724	237875	2.89	1.78	1.56	1.80	1.72	1.71	2.41	2.59	2.00	1.95	2.14	atac_wt_pe
chrI	238032	238183	2.87	2.03	1.77	2.56	3.48	3.39	3.46	4.94	4.52	5.12	4.78	atac_wt_se
chrI	238435	238586	2.88	2.51	2.50	2.03	2.88	3.33	1.43	1.76	1.54	1.34	1.46	atac_wt_pe
chrI	240340	240491	6.40	2.19	1.51	1.29	1.32	1.44	0.69	0.67	0.50	0.60	0.72	atac_wt_pe
chrI	240779	240930	2.45	2.67	1.17	1.25	1.15	1.43	0.72	0.90	0.54	0.64	0.73	atac_wt_pe
chrI	251745	251896	0.35	0.73	0.52	1.60	3.33	8.53	0.17	0.19	0.17	0.16	0.19	atac_wt_pe
chrI	251910	252061	0.81	1.31	0.95	3.57	7.63	11.01	0.33	0.52	0.30	0.27	0.35	atac_wt_pe
chrI	257942	258093	3.71	2.72	2.78	5.76	4.69	2.94	3.63	4.64	4.96	4.44	4.87	atac_wt_pe
chrI	258518	258669	1.70	1.35	1.60	1.75	1.44	1.62	2.28	1.72	1.74	1.76	1.88	atac_glp1_se
chrI	260242	260393	4.17	2.43	1.56	2.04	2.18	1.86	1.21	1.32	0.91	0.79	1.27	atac_wt_pe
chrI	260864	261015	1.18	1.14	1.47	1.00	1.86	2.42	3.72	2.31	3.66	2.47	3.15	atac_glp1_se
chrI	262026	262177	1.35	2.00	3.19	1.87	1.48	3.69	4.89	4.18	3.76	3.61	5.32	atac_wt_pe
chrI	262814	262965	1.26	1.18	1.56	1.25	1.89	2.23	2.39	2.54	2.49	2.22	2.89	atac_glp1_se
chrI	267240	267391	0.49	1.83	1.40	1.00	1.22	2.50	3.57	2.47	2.38	2.01	2.30	atac_glp1_se
chrI	268137	268288	1.24	1.24	1.77	1.61	2.96	1.15	1.54	2.24	2.44	2.05	2.22	atac_wt_pe
chrI	270330	270481	5.76	2.94	3.00	2.03	2.20	2.20	1.72	2.12	1.53	2.27	2.35	atac_wt_pe
chrI	270973	271124	3.53	2.69	2.86	2.33	2.70	3.21	6.20	6.57	8.51	7.03	8.28	atac_wt_pe
chrI	272558	272709	2.91	1.61	0.95	0.77	1.27	0.84	0.71	0.65	0.67	1.00	1.26	atac_wt_pe
chrI	273598	273749	2.52	1.42	1.38	1.23	1.70	2.28	5.26	4.41	5.47	5.53	3.62	atac_wt_pe
chrI	274470	274621	11.12	2.01	2.35	1.82	1.85	1.76	0.73	1.08	0.82	1.15	1.19	atac_wt_pe
chrI	275718	275869	5.49	2.97	3.61	1.88	2.26	1.57	1.20	1.88	1.77	2.00	1.75	atac_wt_pe
chrI	276570	276721	5.12	3.69	3.13	2.32	2.18	1.71	1.27	1.27	1.10	1.33	1.88	atac_wt_pe
chrI	277106	277257	11.76	4.98	5.21	5.32	3.08	2.24	3.94	3.70	3.77	4.99	5.35	atac_wt_pe
chrI	278092	278243	2.98	3.81	4.16	2.38	3.03	3.14	2.94	2.75	2.40	2.44	3.43	atac_wt_pe
chrI	279892	280043	12.65	7.76	10.55	9.55	13.55	9.43	19.70	18.74	18.84	18.57	16.76	atac_wt_pe
chrI	280353	280504	3.51	2.77	2.94	2.55	3.91	3.54	1.79	1.80	1.97	2.07	2.31	atac_wt_se
chrI	282027	282178	0.61	1.83	1.28	1.25	1.23	1.35	0.67	0.90	0.88	0.61	1.03	atac_wt_pe
chrI	287791	287942	1.88	1.84	1.57	1.84	3.35	3.82	0.93	1.40	1.05	1.14	1.17	atac_wt_se
chrI	288130	288281	0.60	1.10	0.50	3.22	5.95	7.88	0.60	0.38	0.28	0.49	0.32	atac_wt_pe
chrI	289111	289262	14.00	13.90	12.51	18.81	13.87	11.26	23.73	20.63	17.48	21.22	20.13	atac_wt_pe
chrI	290377	290528	2.42	3.04	3.04	3.37	3.02	2.99	6.52	6.38	5.46	4.26	4.13	atac_wt_pe
chrI	293197	293348	7.51	5.14	4.68	3.40	3.03	2.42	2.27	3.50	2.76	3.00	4.89	atac_wt_pe
chrI	295960	296111	12.48	10.60	12.12	11.86	10.83	5.25	6.85	4.95	4.01	4.16	5.81	atac_wt_pe
chrI	296237	296388	6.42	6.42	5.65	5.48	3.41	2.69	3.42	2.32	2.43	2.40	3.64	atac_wt_pe
chrI	297434	297585	7.15	3.68	3.97	2.99	2.40	2.50	1.41	1.73	1.11	1.69	1.59	atac_wt_pe
chrI	297619	297770	6.29	4.03	4.80	3.53	2.50	2.21	2.17	2.35	1.76	2.50	2.16	atac_wt_pe
chrI	298430	298581	5.07	12.84	15.34	13.72	14.03	8.23	18.01	15.64	14.62	12.86	14.42	atac_wt_pe
chrI	299772	299923	18.77	28.22	47.27	29.14	30.46	16.40	34.03	31.29	25.17	26.55	23.88	atac_wt_pe
chrI	300739	300890	2.22	2.21	2.55	1.88	2.14	2.01	2.58	3.37	3.25	2.45	2.78	atac_glp1_se
chrI	301309	301460	2.12	2.92	2.83	3.36	2.70	3.95	4.98	4.56	4.43	4.82	4.75	atac_wt_se
chrI	301548	301699	1.72	2.13	2.13	1.71	2.06	3.15	6.96	7.46	7.32	6.42	7.17	atac_glp1_se
chrI	302102	302253	1.88	2.85	2.83	1.84	1.68	1.48	1.18	1.32	1.27	1.69	1.51	atac_wt_pe
chrI	305684	305835	0.84	1.13	0.90	1.21	1.29	1.93	5.32	4.38	4.80	4.74	3.20	atac_glp1_se
chrI	305916	306067	1.12	1.78	1.67	1.98	2.44	2.55	3.80	3.97	4.26	3.40	2.43	atac_glp1_se
chrI	308035	308186	1.50	3.14	2.00	1.89	1.62	2.40	3.47	2.79	3.01	2.56	2.46	atac_glp1_se
chrI	308884	309035	1.54	1.60	1.49	1.38	1.47	1.72	2.69	3.02	4.70	3.99	3.15	atac_glp1_se
chrI	310902	311053	17.97	5.78	5.78	8.26	10.23	14.59	22.46	14.35	16.03	16.77	12.37	atac_wt_pe
chrI	311293	311444	3.71	2.55	2.04	3.03	4.24	4.51	4.04	3.07	2.91	3.18	2.72	atac_wt_pe
chrI	314281	314432	2.47	2.62	2.25	4.68	5.15	3.98	2.28	4.22	4.02	2.97	2.72	atac_wt_pe
chrI	315227	315378	19.27	16.69	15.64	26.49	19.43	20.58	38.90	37.10	57.56	56.59	59.31	atac_wt_pe
chrI	315487	315638	7.47	10.20	16.66	17.34	17.40	20.14	40.52	44.26	47.86	47.66	47.57	atac_wt_pe
chrI	316147	316298	22.08	11.43	8.75	23.56	23.01	31.22	24.46	23.63	22.95	24.67	24.27	atac_wt_pe
chrI	316681	316832	1.96	1.99	1.42	2.25	2.63	3.31	1.81	1.64	1.51	1.48	1.77	atac_wt_pe
chrI	318178	318329	2.45	2.58	1.45	2.24	2.63	3.11	5.34	3.88	3.07	3.18	3.62	atac_wt_pe
chrI	321003	321154	1.45	1.63	1.64	2.35	1.98	2.11	2.23	1.93	1.42	1.82	2.05	atac_glp1_se
chrI	323569	323720	7.62	5.95	3.36	7.58	5.74	6.69	9.26	6.63	8.70	10.18	11.23	atac_wt_pe
chrI	335039	335190	0.25	1.08	0.17	0.74	0.86	2.65	0.65	0.40	0.64	0.67	0.94	atac_wt_pe
chrI	342946	343097	0.94	1.78	0.93	1.46	1.64	2.27	3.39	2.08	2.73	3.10	2.57	atac_glp1_se
chrI	347231	347382	0.95	1.07	0.92	2.44	5.67	10.03	0.31	0.26	0.35	0.38	0.39	atac_wt_pe
chrI	347475	347626	1.29	1.98	1.84	2.86	4.54	8.18	0.57	0.78	0.59	0.74	1.03	atac_wt_pe
chrI	348358	348509	7.57	13.19	12.69	15.89	20.34	14.76	19.68	21.27	19.25	20.74	15.71	atac_wt_pe
chrI	354499	354650	2.74	3.62	3.33	2.33	3.02	3.59	1.02	1.13	1.29	1.62	1.65	atac_wt_pe
chrI	363984	364135	0.49	0.94	0.63	4.12	10.10	13.88	0.33	0.37	0.27	0.26	0.36	atac_wt_pe
chrI	364271	364422	1.21	1.02	1.14	4.84	11.69	17.27	0.98	1.10	0.65	0.86	0.86	atac_wt_pe
chrI	377324	377475	3.22	2.76	3.30	2.40	2.94	3.36	1.27	1.54	1.66	1.65	1.80	atac_wt_se
chrI	378953	379104	5.38	5.45	4.83	7.51	4.76	7.51	7.16	5.66	7.29	4.61	4.61	atac_wt_pe
chrI	381581	381732	16.36	6.66	5.93	9.59	11.20	11.60	42.46	51.31	54.52	49.51	45.45	atac_wt_pe
chrI	381912	382063	4.64	3.56	4.23	3.88	4.95	7.30	17.41	22.20	29.04	26.31	25.12	atac_glp1_se
chrI	382446	382597	57.29	45.20	40.21	72.58	60.16	60.23	75.51	67.00	68.30	68.43	65.61	atac_wt_pe
chrI	382794	382945	6.32	5.04	4.95	5.60	8.71	10.67	4.87	5.34	5.91	5.86	4.80	atac_wt_pe
chrI	389663	389814	0.97	1.77	1.33	1.77	1.38	1.41	1.06	1.14	1.19	1.67	2.40	atac_glp1_se
chrI	390631	390782	2.19	4.82	3.45	3.81	3.68	2.91	7.24	5.39	4.19	4.72	5.35	atac_wt_pe
chrI	395264	395415	55.88	55.19	68.96	63.58	51.29	38.92	84.61	88.96	80.72	77.22	76.90	atac_wt_pe
chrI	395972	396123	0.90	2.16	1.01	1.57	1.60	1.57	1.81	2.41	1.93	1.86	2.10	atac_glp1_se
chrI	397844	397995	167.78	119.91	168.59	182.00	126.19	76.42	141.24	133.48	149.01	151.64	160.14	atac_wt_pe
chrI	398466	398617	1.06	2.42	1.23	4.13	6.17	9.14	0.84	0.90	1.00	1.12	1.30	atac_wt_pe
chrI	400529	400680	1.72	2.15	2.07	3.04	3.95	7.34	5.93	2.12	2.32	1.79	2.25	atac_wt_pe
chrI	414422	414573	0.44	0.85	0.36	1.37	1.80	4.83	3.43	1.39	1.38	1.58	1.99	atac_wt_pe
chrI	418846	418997	8.26	6.31	4.66	3.86	2.64	2.46	2.94	2.85	2.33	3.24	3.42	atac_wt_pe
chrI	419191	419342	1.94	1.68	1.38	1.42	1.53	1.34	1.46	1.86	1.43	1.10	1.92	atac_glp1_se
chrI	424601	424752	5.42	1.95	2.01	1.60	1.21	1.42	0.93	1.00	1.03	0.61	0.79	atac_wt_pe
chrI	426921	427072	2.60	2.62	2.87	2.17	1.38	1.26	1.55	1.70	1.55	1.85	2.13	atac_wt_se
chrI	429221	429372	4.89	3.94	8.90	10.71	12.11	4.99	10.79	11.56	12.27	10.55	9.64	atac_wt_pe
chrI	430213	430364	2.55	2.09	2.10	1.94	1.94	1.34	0.77	0.82	0.82	1.00	0.79	atac_wt_pe
chrI	432129	432280	0.24	1.58	0.17	1.64	2.14	6.19	5.03	1.36	1.69	1.42	1.80	atac_wt_pe
chrI	432661	432812	4.77	2.72	2.31	2.91	3.07	4.52	4.71	2.86	2.93	3.73	3.07	atac_wt_pe
chrI	433647	433798	12.58	10.71	19.97	13.62	14.81	12.06	27.65	16.81	17.36	17.91	20.76	atac_wt_pe
chrI	434613	434764	2.77	4.13	4.36	3.87	8.20	5.39	12.72	8.32	7.30	7.28	8.94	atac_wt_pe
chrI	435542	435693	4.85	8.39	12.10	11.33	8.14	4.76	7.38	8.10	7.65	9.11	11.37	atac_wt_pe
chrI	436161	436312	1.08	1.96	1.21	1.18	1.55	1.10	1.33	1.19	1.61	1.50	1.71	atac_wt_pe
chrI	436926	437077	12.08	2.72	3.25	2.30	2.05	1.21	1.58	1.52	1.42	1.52	1.62	atac_wt_pe
chrI	437716	437867	6.82	2.19	2.43	2.20	2.11	1.81	1.45	1.22	1.31	1.66	1.94	atac_wt_pe
chrI	438129	438280	10.02	7.34	9.76	9.76	6.65	3.55	5.17	4.63	3.55	3.69	5.32	atac_wt_pe
chrI	439436	439587	13.42	1.83	2.12	1.41	1.41	2.51	0.80	1.06	0.63	0.77	0.87	atac_wt_pe
chrI	440513	440664	14.91	2.59	3.12	2.19	3.30	2.05	1.62	1.59	1.25	1.35	1.70	atac_wt_pe
chrI	440821	440972	9.60	2.38	2.24	1.52	1.75	1.30	0.73	0.97	0.78	0.92	1.30	atac_wt_pe
chrI	441380	441531	14.65	1.93	2.50	1.88	1.37	2.24	0.80	1.11	0.88	0.83	1.05	atac_wt_pe
chrI	442170	442321	8.77	3.50	3.28	2.59	2.11	1.98	1.72	1.65	1.14	1.45	2.03	atac_wt_pe
chrI	443208	443359	21.42	4.18	3.91	3.38	2.82	3.80	1.10	1.25	1.16	1.18	1.25	atac_wt_pe
chrI	445616	445767	8.25	1.58	1.16	1.06	1.20	1.09	0.65	0.62	0.53	0.78	0.68	atac_wt_pe
chrI	446369	446520	5.70	2.04	1.96	1.76	1.02	1.43	0.64	0.99	0.51	0.60	0.87	atac_wt_pe
chrI	447650	447801	7.24	1.77	2.56	2.08	1.56	1.46	0.97	1.16	0.94	1.20	1.37	atac_wt_pe
chrI	448663	448814	7.12	2.15	2.01	1.74	1.36	1.44	0.81	1.09	1.02	1.36	1.13	atac_wt_pe
chrI	449466	449617	9.93	2.56	2.46	2.26	1.52	2.03	1.23	1.36	1.15	1.28	1.79	atac_wt_pe
chrI	452639	452790	13.35	2.58	2.29	2.09	1.99	2.17	0.91	1.00	0.97	1.28	1.49	atac_wt_pe
chrI	453529	453680	7.08	1.67	1.51	1.38	1.20	1.74	0.79	1.03	0.95	0.93	1.30	atac_wt_pe
chrI	454817	454968	2.94	1.28	1.02	1.05	0.87	0.85	0.47	0.60	0.63	0.45	0.77	atac_wt_pe
chrI	461671	461822	5.70	8.93	3.87	12.73	7.04	6.89	9.96	7.39	8.16	10.42	8.85	atac_wt_pe
chrI	471046	471197	9.59	6.49	7.66	11.62	6.25	4.14	10.40	11.86	12.51	11.62	15.81	atac_wt_pe
chrI	475487	475638	1.24	1.45	0.74	0.72	0.50	0.90	0.46	0.58	0.40	0.51	0.76	atac_wt_pe
chrI	476370	476521	5.51	1.91	1.42	0.92	1.29	1.57	0.48	0.61	0.76	0.67	0.64	atac_wt_pe
chrI	477459	477610	6.47	2.05	1.89	1.50	1.48	1.91	0.48	0.86	0.38	0.58	0.59	atac_wt_pe
chrI	488344	488495	21.01	19.02	14.61	29.27	22.16	20.03	29.06	24.74	25.64	28.62	21.15	atac_wt_pe
chrI	489880	490031	1.63	2.72	3.43	4.69	5.84	6.12	13.27	9.51	11.68	10.01	6.30	atac_wt_pe
chrI	492427	492578	1.47	1.51	1.50	1.42	1.48	1.48	1.80	3.58	3.78	2.39	2.49	atac_glp1_se
chrI	492687	492838	2.23	2.34	2.44	2.59	2.89	2.49	3.53	4.49	4.44	3.19	4.22	atac_wt_pe
chrI	495554	495705	1.36	1.68	1.59	2.04	2.24	1.81	3.78	2.38	2.21	1.60	1.49	atac_glp1_se
chrI	506274	506425	1.17	1.44	1.48	3.18	7.76	11.48	0.21	0.22	0.40	0.36	0.35	atac_wt_pe
chrI	509951	510102	1.91	2.04	1.37	2.14	2.53	4.12	2.64	2.32	4.57	4.79	6.55	atac_wt_se
chrI	510465	510616	1.67	1.55	1.27	1.58	1.76	3.19	2.62	2.84	2.30	1.71	2.67	atac_wt_se
chrI	510780	510931	1.39	2.07	2.33	2.16	2.99	5.01	1.53	2.99	3.00	2.57	2.11	atac_wt_se
chrI	511173	511324	2.12	1.42	1.79	2.65	3.70	5.37	4.82	5.14	6.26	4.78	3.38	atac_wt_se
chrI	515173	515324	1.62	2.87	3.04	3.05	7.42	5.10	8.80	13.20	18.51	16.61	22.33	atac_wt_pe
chrI	516342	516493	1.93	3.32	3.64	3.96	4.93	6.38	10.72	8.15	8.11	8.00	6.94	atac_wt_pe
chrI	516716	516867	5.03	8.13	18.36	18.34	17.21	14.18	24.53	18.91	18.42	16.55	15.49	atac_wt_pe
chrI	518192	518343	8.19	9.07	19.38	20.85	27.75	21.13	34.59	30.85	29.97	28.02	17.02	atac_wt_pe
chrI	518546	518697	72.75	51.43	77.79	92.26	83.13	54.15	116.27	132.92	115.55	107.80	80.55	atac_wt_pe
chrI	519500	519651	4.86	3.87	2.99	3.42	3.67	4.23	1.56	2.02	1.84	2.33	2.40	atac_wt_pe
chrI	519880	520031	1.32	1.58	0.84	2.72	4.56	8.81	0.73	0.80	0.90	1.08	1.32	atac_wt_pe
chrI	520355	520506	1.64	2.25	1.23	2.84	4.10	4.60	0.69	0.92	0.99	0.79	0.78	atac_wt_se
chrI	521439	521590	22.54	3.92	5.71	8.07	8.75	2.56	1.39	1.50	0.99	1.24	1.35	atac_wt_pe
chrI	524261	524412	3.14	3.84	5.13	4.84	3.18	1.53	1.44	1.53	1.13	1.73	1.34	atac_wt_pe
chrI	524577	524728	4.10	6.59	8.30	9.92	8.29	3.72	5.53	3.42	1.70	1.88	2.28	atac_wt_pe
chrI	526200	526351	5.37	2.09	1.61	5.39	6.19	1.65	0.88	1.09	0.79	0.66	0.72	atac_wt_pe
chrI	527268	527419	4.13	7.12	2.80	6.42	5.28	1.53	1.19	0.91	0.61	0.92	0.85	atac_wt_pe
chrI	527540	527691	8.29	3.19	3.20	12.15	13.72	1.88	1.05	1.17	0.92	0.66	0.79	atac_wt_pe
chrI	528015	528166	13.65	8.86	4.14	16.43	18.69	2.21	1.51	0.96	0.82	0.81	0.70	atac_wt_pe
chrI	529259	529410	4.35	3.14	1.82	5.40	6.67	1.15	0.68	0.43	0.70	0.53	0.56	atac_wt_pe
chrI	529557	529708	7.30	6.62	2.60	14.68	14.26	1.58	2.07	1.66	0.59	0.61	0.69	atac_wt_pe
chrI	529911	530062	6.17	14.00	5.09	9.92	7.98	1.75	2.04	1.37	1.00	0.96	0.98	atac_wt_pe
chrI	530211	530362	10.49	9.56	3.88	13.05	18.21	2.48	1.82	2.00	1.05	1.05	1.14	atac_wt_pe
chrI	530466	530617	17.86	14.16	6.44	18.82	19.78	2.88	1.50	1.80	1.05	1.00	1.02	atac_wt_pe
chrI	531128	531279	4.22	2.40	1.91	5.25	6.67	1.43	0.64	0.98	0.68	0.63	0.61	atac_wt_pe
chrI	531383	531534	2.34	1.80	1.77	3.91	3.43	1.46	0.54	0.59	0.50	0.41	0.67	atac_wt_pe
chrI	531635	531786	4.21	2.51	2.18	5.93	8.14	1.40	0.67	0.87	0.56	0.66	0.69	atac_wt_pe
chrI	532895	533046	3.69	2.97	3.12	4.76	4.08	2.11	0.91	1.19	0.74	0.79	0.79	atac_wt_pe
chrI	533218	533369	2.58	2.17	2.06	4.10	4.28	1.74	0.85	0.97	0.87	0.69	0.95	atac_wt_pe
chrI	533479	533630	1.72	3.37	0.89	4.04	5.02	1.67	0.98	0.96	0.99	1.18	1.15	atac_wt_pe
chrI	534254	534405	4.64	5.37	2.88	5.31	6.69	8.67	5.09	3.42	3.98	4.69	4.99	atac_wt_pe
chrI	535378	535529	14.52	13.55	5.29	16.31	11.34	13.11	17.26	11.21	17.47	18.36	22.90	atac_wt_pe
chrI	536376	536527	6.96	7.27	7.88	10.88	10.36	13.67	5.98	4.36	4.07	3.83	4.41	atac_wt_pe
chrI	536800	536951	33.95	28.62	27.45	44.04	31.13	38.89	76.80	61.62	65.76	59.26	61.22	atac_wt_pe
chrI	537278	537429	3.50	4.79	7.24	9.77	10.35	10.54	18.59	19.95	23.70	20.27	21.71	atac_wt_pe
chrI	538712	538863	4.36	2.61	3.08	3.42	5.04	4.39	3.40	4.85	4.01	3.09	2.87	atac_wt_pe
chrI	542266	542417	25.00	13.70	8.43	18.08	10.26	7.57	12.47	10.43	9.32	10.33	10.55	atac_wt_pe
chrI	543376	543527	3.96	5.89	4.59	4.01	3.04	2.85	3.89	3.36	3.04	4.65	5.01	atac_wt_pe
chrI	545603	545754	4.18	7.42	17.83	19.97	16.55	20.88	32.01	29.63	31.16	25.57	21.25	atac_wt_pe
chrI	545768	545919	2.79	6.77	15.84	19.64	14.88	20.71	26.49	26.30	26.97	21.07	18.21	atac_wt_pe
chrI	546615	546766	0.85	1.50	1.23	0.87	1.53	1.29	1.77	3.19	3.25	3.66	3.18	atac_glp1_se
chrI	547202	547353	2.91	4.17	3.58	3.13	2.86	2.86	3.84	3.96	3.93	4.26	3.80	atac_wt_pe
chrI	547514	547665	1.74	2.59	2.90	1.84	2.22	1.96	2.26	2.25	2.82	3.50	3.06	atac_glp1_se
chrI	548093	548244	5.28	11.76	11.76	15.31	13.40	14.53	26.77	20.39	22.61	23.40	20.38	atac_wt_pe
chrI	548412	548563	1.20	5.26	3.27	4.40	5.97	7.61	14.90	15.99	17.21	16.10	13.96	atac_wt_se
chrI	549325	549476	1.51	5.46	6.19	5.51	5.39	7.52	18.13	19.77	25.09	23.33	26.00	atac_wt_pe
chrI	549967	550118	2.20	2.54	2.90	2.01	2.17	2.24	2.97	3.33	3.41	3.64	3.93	atac_glp1_se
chrI	550456	550607	1.61	1.16	1.20	1.23	1.46	2.97	10.27	5.97	3.42	2.51	2.11	atac_glp1_se
chrI	556118	556269	1.77	1.84	1.63	2.27	1.68	2.49	6.29	4.02	2.71	3.23	2.17	atac_glp1_se
chrI	557289	557440	16.48	7.45	7.20	24.51	19.92	3.71	6.52	4.02	3.02	3.74	4.13	atac_wt_pe
chrI	561140	561291	3.39	4.20	4.57	3.75	2.52	3.13	12.49	6.56	10.35	12.48	12.07	atac_wt_pe
chrI	562622	562773	2.23	2.51	2.01	1.84	2.12	1.86	2.19	2.65	3.02	2.84	1.47	atac_glp1_se
chrI	562987	563138	3.56	2.78	2.79	1.79	1.83	1.69	1.32	1.32	1.21	1.31	1.39	atac_wt_se
chrI	565066	565217	1.77	1.59	2.12	1.90	2.12	1.67	2.02	2.49	2.26	1.90	1.80	atac_glp1_se
chrI	566552	566703	5.06	2.24	2.26	1.21	1.28	1.52	1.00	1.19	1.10	1.18	1.70	atac_wt_se
chrI	572756	572907	2.15	1.63	2.68	4.63	4.68	1.36	1.22	0.89	0.63	0.80	0.92	atac_wt_se
chrI	575159	575310	5.78	2.09	3.72	11.61	7.33	1.99	1.58	0.90	0.91	0.66	0.73	atac_wt_pe
chrI	597055	597206	1.58	1.64	1.09	2.34	2.42	2.88	1.72	1.12	0.90	1.05	1.19	atac_wt_se
chrI	606635	606786	5.93	3.08	2.39	2.11	1.93	3.71	1.05	1.56	1.51	1.50	1.36	atac_wt_pe
chrI	608904	609055	3.82	4.04	5.34	3.45	4.10	2.79	4.22	2.55	2.79	2.65	3.93	atac_wt_pe
chrI	611702	611853	2.67	4.21	5.70	4.45	5.15	4.22	6.48	4.36	4.34	4.66	5.77	atac_wt_pe
chrI	613173	613324	4.38	2.37	3.24	3.43	3.32	2.54	4.60	4.51	2.76	2.87	2.88	atac_wt_pe
chrI	613311	613462	5.35	2.40	2.82	3.06	2.78	2.87	3.73	3.86	3.04	2.87	3.35	atac_wt_pe
chrI	618022	618173	1.28	1.85	1.67	3.91	5.11	3.88	15.46	7.48	7.09	7.97	6.84	atac_wt_pe
chrI	629589	629740	0.46	0.63	0.50	0.69	1.03	1.65	2.02	3.37	2.95	2.48	1.94	atac_glp1_se
chrI	630263	630414	0.72	0.98	0.89	1.00	1.51	2.51	1.72	2.03	2.34	1.87	1.76	atac_wt_pe
chrI	636763	636914	16.90	11.54	9.40	20.36	16.18	15.65	29.77	24.43	23.42	22.95	19.79	atac_wt_pe
chrI	638012	638163	2.36	2.32	1.85	3.80	5.08	7.18	6.56	4.50	3.90	3.77	3.74	atac_wt_pe
chrI	638324	638475	4.49	5.44	5.32	20.37	18.75	30.50	7.90	2.55	3.01	3.63	5.52	atac_wt_pe
chrI	640117	640268	3.70	4.43	4.77	4.43	3.89	3.24	4.35	5.38	4.15	4.43	5.30	atac_wt_pe
chrI	644881	645032	3.80	2.03	2.05	1.70	1.22	1.09	0.78	1.19	0.84	0.85	0.84	atac_wt_se
chrI	649573	649724	1.47	2.06	1.78	1.18	1.19	1.46	0.80	0.99	0.80	0.75	0.97	atac_wt_pe
chrI	653957	654108	2.85	1.74	1.13	2.11	1.68	2.12	2.33	1.80	1.89	2.44	2.75	atac_wt_se
chrI	663586	663737	53.82	38.84	34.28	60.71	41.82	34.34	59.07	51.35	49.09	49.62	39.82	atac_wt_pe
chrI	663971	664122	2.83	2.17	0.96	1.28	1.42	1.80	0.79	0.56	0.72	0.92	0.64	atac_wt_se
chrI	666417	666568	2.80	2.16	2.25	2.91	2.66	2.95	1.01	1.51	1.06	1.42	0.92	atac_wt_se
chrI	670851	671002	1.60	3.03	0.92	2.12	2.10	3.25	0.97	0.89	1.66	1.66	1.55	atac_wt_se
chrI	678257	678408	0.69	1.12	0.69	1.78	2.42	3.33	2.97	1.24	1.23	1.25	0.96	atac_wt_pe
chrI	680054	680205	0.88	1.27	0.85	2.15	2.68	2.50	8.25	4.12	4.77	6.35	5.17	atac_wt_pe
chrI	681488	681639	2.32	1.90	1.96	1.41	1.55	1.36	0.61	0.76	1.08	0.85	1.19	atac_wt_pe
chrI	682941	683092	3.90	2.48	2.37	2.50	2.45	2.06	2.29	1.61	1.63	2.13	2.03	atac_wt_pe
chrI	691389	691540	1.56	1.78	1.46	1.48	1.89	1.97	4.11	2.42	2.24	2.67	2.61	atac_glp1_se
chrI	716297	716448	1.58	1.84	1.32	2.16	2.41	2.76	2.03	2.39	3.00	2.34	2.54	atac_glp1_se
chrI	716703	716854	48.50	42.24	47.07	67.45	50.03	39.44	94.22	84.39	77.36	69.10	63.85	atac_wt_pe
chrI	717719	717870	0.66	0.72	0.53	0.90	2.01	2.80	0.73	0.75	0.92	1.01	1.47	atac_wt_se
chrI	719588	719739	1.37	1.88	1.54	3.56	8.46	11.65	0.81	0.86	1.09	1.22	0.97	atac_wt_pe
chrI	719921	720072	11.87	7.04	5.25	13.25	14.35	17.84	9.20	7.08	6.82	6.43	6.09	atac_wt_pe
chrI	720274	720425	7.57	3.31	2.85	3.93	5.53	6.44	2.58	1.98	1.07	1.73	1.16	atac_wt_pe
chrI	737588	737739	2.40	2.47	2.80	2.28	2.23	2.19	1.57	1.48	0.93	1.65	2.02	atac_wt_pe
chrI	744883	745034	0.78	0.99	0.91	1.46	2.44	1.08	1.24	0.83	0.64	0.67	0.58	atac_wt_se
chrI	745495	745646	2.07	1.66	1.51	3.31	4.95	1.03	1.72	1.60	0.83	0.67	0.78	atac_wt_pe
chrI	754147	754298	2.64	2.52	2.54	5.29	4.05	2.98	3.41	1.71	1.35	1.44	1.56	atac_wt_se
chrI	754614	754765	1.77	4.65	3.98	14.86	16.85	31.19	32.84	11.81	11.66	8.76	7.94	atac_wt_pe
chrI	756959	757110	26.86	11.83	21.15	36.38	32.23	11.45	18.08	11.26	8.80	9.05	11.42	atac_wt_pe
chrI	762058	762209	1.41	1.40	1.98	1.34	2.07	3.53	4.04	3.48	4.61	3.57	4.19	atac_wt_pe
chrI	762430	762581	2.60	2.58	2.99	1.80	1.96	1.76	2.41	2.57	3.64	4.93	5.52	atac_glp1_se
chrI	763453	763604	12.84	5.86	17.43	26.86	34.79	10.27	15.26	11.29	8.26	7.65	6.37	atac_wt_pe
chrI	766064	766215	2.41	1.90	2.27	2.14	3.82	1.43	1.59	1.24	0.94	1.06	1.14	atac_wt_se
chrI	770779	770930	3.46	1.68	1.96	2.16	2.23	1.33	0.89	1.05	0.55	0.55	0.71	atac_wt_pe
chrI	781576	781727	5.29	1.72	2.18	1.39	1.49	5.08	1.22	1.23	0.70	1.11	1.42	atac_wt_pe
chrI	784086	784237	3.81	2.22	2.49	1.87	1.07	1.41	1.03	1.19	0.84	1.03	1.35	atac_wt_pe
chrI	784517	784668	1.96	2.29	2.21	1.32	1.30	1.52	0.84	1.08	0.52	0.64	0.67	atac_wt_pe
chrI	785303	785454	3.53	1.51	1.65	1.45	0.95	1.10	0.93	0.96	0.56	0.62	0.92	atac_wt_pe
chrI	788100	788251	8.62	3.22	3.35	2.91	1.87	1.50	1.54	1.92	1.73	1.71	2.19	atac_wt_pe
chrI	788613	788764	3.01	2.59	1.45	1.63	2.11	3.95	1.24	0.95	0.80	1.00	1.02	atac_wt_se
chrI	789474	789625	4.27	2.19	2.51	1.47	1.29	1.37	0.80	1.10	0.99	1.08	1.45	atac_wt_pe
chrI	794500	794651	3.87	2.95	2.54	1.76	1.12	1.21	0.80	1.21	0.63	1.01	0.99	atac_wt_se
chrI	796991	797142	4.37	3.79	4.31	2.32	1.51	1.63	1.39	1.38	1.06	1.15	1.49	atac_wt_pe
chrI	798393	798544	3.36	2.11	2.44	1.61	1.15	1.17	0.89	0.91	0.88	0.93	1.24	atac_wt_pe
chrI	801349	801500	3.45	3.40	4.54	1.43	1.64	2.06	1.32	1.91	1.21	1.80	2.25	atac_wt_se
chrI	801589	801740	3.72	3.08	3.80	1.56	1.55	1.26	1.26	1.51	1.27	1.36	1.59	atac_wt_se
chrI	802009	802160	1.45	2.19	1.81	1.23	1.15	1.43	0.92	1.08	0.65	0.79	0.91	atac_wt_pe
chrI	803805	803956	2.21	1.75	1.86	2.19	2.96	4.24	0.89	0.92	1.25	1.17	1.35	atac_wt_pe
chrI	806914	807065	4.15	1.51	2.65	1.62	1.20	1.37	1.15	1.42	1.05	1.48	1.29	atac_wt_se
chrI	807659	807810	3.05	2.10	2.66	1.42	1.38	1.36	0.91	1.02	0.91	0.81	0.83	atac_wt_se
chrI	809011	809162	7.34	6.06	7.56	3.57	3.70	2.83	2.39	2.40	1.61	2.63	2.25	atac_wt_pe
chrI	809243	809394	4.39	3.42	4.91	2.19	1.97	1.51	1.35	1.58	0.90	1.09	1.24	atac_wt_pe
chrI	810865	811016	5.24	2.03	2.35	1.43	1.49	1.66	0.69	0.87	0.89	0.74	0.65	atac_wt_pe
chrI	812295	812446	5.88	3.82	4.25	2.65	2.05	1.80	1.06	1.45	1.17	1.55	1.77	atac_wt_pe
chrI	812616	812767	4.24	3.95	3.70	2.31	1.80	1.66	1.44	2.05	1.76	1.84	2.98	atac_glp1_se
chrI	814026	814177	8.95	4.61	4.46	4.27	3.28	2.31	3.29	3.46	3.07	3.74	3.37	atac_wt_pe
chrI	815682	815833	1.40	2.05	1.99	1.23	4.70	1.96	3.11	4.54	4.36	3.61	3.36	atac_wt_se
chrI	816061	816212	3.34	3.42	7.18	3.13	2.19	1.51	2.12	2.90	1.71	2.35	2.04	atac_wt_pe
chrI	818191	818342	8.64	10.96	18.92	11.15	17.39	8.29	10.45	8.88	9.76	9.55	9.43	atac_wt_pe
chrI	819584	819735	7.61	5.71	8.34	4.35	3.82	2.62	4.35	3.73	3.71	3.25	3.89	atac_wt_pe
chrI	820087	820238	2.91	2.77	4.36	4.90	5.24	4.31	12.20	7.49	8.48	7.88	5.82	atac_wt_pe
chrI	821591	821742	3.75	3.17	3.24	2.14	2.88	1.80	2.65	1.99	1.94	1.93	2.13	atac_wt_pe
chrI	822759	822910	1.59	1.61	1.81	1.45	4.61	1.83	2.87	2.80	2.32	2.62	2.23	atac_wt_se
chrI	824784	824935	1.56	1.42	1.71	1.14	3.97	2.36	3.82	2.92	2.77	2.49	2.67	atac_wt_pe
chrI	826336	826487	10.48	5.65	8.10	5.61	7.41	4.48	8.50	6.91	5.78	6.48	7.74	atac_wt_pe
chrI	828048	828199	2.00	2.12	2.39	1.96	1.86	1.61	2.04	2.67	3.10	2.96	1.66	atac_glp1_se
chrI	828740	828891	3.51	2.64	3.74	2.31	4.33	3.17	4.07	4.07	2.95	2.61	2.70	atac_wt_pe
chrI	830006	830157	6.85	2.23	2.32	2.83	7.65	1.76	1.33	1.52	1.21	1.41	2.58	atac_wt_pe
chrI	833960	834111	0.37	1.14	0.63	0.53	0.63	0.25	0.40	0.38	0.28	0.43	0.52	atac_wt_pe
chrI	834631	834782	3.52	3.04	4.27	3.10	2.63	1.73	1.71	1.33	0.87	1.31	1.34	atac_wt_pe
chrI	834836	834987	3.46	2.04	3.39	2.68	4.29	1.84	1.24	1.37	0.96	1.18	1.21	atac_wt_pe
chrI	835337	835488	1.34	1.97	1.21	1.73	3.16	1.57	2.77	1.50	1.69	1.31	1.71	atac_wt_pe
chrI	836127	836278	5.17	1.74	2.63	7.52	9.71	1.58	2.05	1.29	0.88	0.62	0.99	atac_wt_pe
chrI	840513	840664	3.77	3.59	3.99	5.69	4.70	2.17	1.21	1.60	1.05	1.07	1.28	atac_wt_pe
chrI	843392	843543	2.07	3.06	2.68	4.48	5.76	5.84	1.75	1.70	1.25	1.73	1.68	atac_wt_pe
chrI	849311	849462	12.41	13.30	23.17	15.64	11.89	6.40	10.68	10.48	7.00	7.26	8.57	atac_wt_pe
chrI	851674	851825	1.70	6.29	7.54	4.91	4.16	2.71	2.16	1.49	1.40	1.65	2.72	atac_wt_pe
chrI	852093	852244	5.55	9.88	19.51	41.12	36.02	36.92	72.94	40.22	56.82	53.05	45.16	atac_wt_pe
chrI	852412	852563	7.87	10.89	14.88	12.37	12.34	9.77	7.30	5.72	5.82	6.22	6.98	atac_wt_pe
chrI	852722	852873	4.08	6.56	5.77	6.74	8.61	10.09	9.67	7.67	6.87	6.62	6.58	atac_wt_pe
chrI	853245	853396	7.96	10.16	5.25	8.33	8.38	9.91	10.67	8.49	8.99	10.32	9.56	atac_wt_pe
chrI	872805	872956	1.30	1.55	1.44	1.35	1.22	1.66	1.99	1.57	2.94	2.75	2.37	atac_glp1_se
chrI	873095	873246	1.34	2.36	1.89	1.96	2.16	2.04	3.61	3.52	4.67	4.96	4.14	atac_glp1_se
chrI	879863	880014	5.97	8.65	9.65	14.39	8.79	5.86	12.05	9.28	6.33	5.55	7.19	atac_wt_pe
chrI	880230	880381	3.85	5.00	5.47	4.92	3.97	2.89	3.39	3.22	2.56	3.07	2.61	atac_wt_pe
chrI	881484	881635	9.61	22.11	31.68	29.22	33.50	18.71	57.96	45.55	39.80	36.81	33.32	atac_wt_pe
chrI	881830	881981	23.04	39.89	40.83	31.34	24.69	11.34	25.17	24.29	17.31	22.27	24.80	atac_wt_pe
chrI	882557	882708	58.30	118.04	214.36	116.38	114.13	63.52	117.47	121.29	110.42	107.17	100.65	atac_wt_pe
chrI	882753	882904	77.19	164.54	301.09	175.39	162.14	91.57	214.29	230.51	190.14	176.99	157.46	atac_wt_pe
chrI	882949	883100	92.92	182.12	323.02	191.24	174.68	99.13	243.94	251.90	203.42	193.91	181.42	atac_wt_pe
chrI	884468	884619	8.48	8.06	9.69	6.22	5.77	3.23	4.24	4.36	4.60	4.56	5.06	atac_wt_pe
chrI	884726	884877	2.07	2.47	3.12	2.02	1.98	2.67	6.29	6.83	10.23	9.78	10.05	atac_glp1_se
chrI	885398	885549	1.10	3.02	2.65	2.23	2.07	1.70	0.92	1.23	1.94	1.81	1.98	atac_wt_pe
chrI	886380	886531	2.10	2.07	2.14	1.51	1.53	2.30	2.07	4.72	12.66	11.51	10.72	atac_glp1_se
chrI	887885	888036	5.95	2.90	3.02	2.22	2.42	2.21	1.33	1.57	2.55	2.76	2.65	atac_wt_pe
chrI	890325	890476	1.05	1.97	1.07	1.49	1.31	2.05	1.38	2.82	8.43	6.80	6.10	atac_glp1_se
chrI	890777	890928	0.92	1.72	1.15	1.20	1.79	2.31	0.72	1.39	4.32	4.05	2.60	atac_glp1_se
chrI	895033	895184	1.49	1.26	1.22	2.51	3.09	4.45	0.47	0.51	0.51	0.76	0.76	atac_wt_pe
chrI	896002	896153	4.38	4.02	3.00	4.20	3.96	3.10	8.34	6.73	4.97	5.98	7.22	atac_wt_pe
chrI	907034	907185	1.02	1.98	1.32	1.13	1.67	1.89	2.05	3.38	3.48	3.32	3.24	atac_glp1_se
chrI	920499	920650	3.50	2.74	3.10	2.18	2.11	1.65	1.49	2.05	1.52	1.96	2.47	atac_wt_se
chrI	927120	927271	2.98	3.21	2.92	1.86	1.58	1.30	1.10	1.51	1.12	1.25	1.93	atac_wt_se
chrI	929718	929869	6.22	6.49	7.52	3.89	2.47	2.01	3.10	3.38	3.20	3.74	4.82	atac_wt_pe
chrI	935117	935268	4.49	2.44	7.81	7.85	3.37	3.07	5.64	3.20	2.06	2.00	2.52	atac_wt_pe
chrI	935782	935933	2.02	1.97	5.21	5.37	1.37	2.45	4.72	2.15	1.63	1.50	1.66	atac_glp1_se
chrI	936633	936784	1.43	2.51	5.07	4.35	1.28	2.80	4.70	4.45	2.41	1.40	1.05	atac_wt_pe
chrI	938410	938561	1.36	1.97	3.18	2.68	1.23	1.66	1.29	1.11	0.47	0.61	0.57	atac_wt_pe
chrI	939603	939754	1.41	2.58	3.12	2.93	2.20	3.60	5.22	3.69	2.23	1.54	1.25	atac_wt_se
chrI	946069	946220	3.43	4.37	4.61	23.69	20.52	28.17	47.83	23.26	31.12	32.14	27.12	atac_wt_pe
chrI	946458	946609	3.12	2.81	3.23	3.98	4.08	5.05	3.75	2.26	2.90	2.49	2.59	atac_wt_se
chrI	954459	954610	14.57	15.97	26.31	20.87	15.62	10.44	13.45	14.13	8.03	8.37	7.24	atac_wt_pe
chrI	954980	955131	3.29	3.56	2.98	5.17	4.06	2.30	2.55	2.36	1.67	2.41	2.09	atac_wt_pe
chrI	955271	955422	6.27	2.60	3.14	2.55	2.61	2.30	1.81	1.19	1.42	1.24	1.70	atac_wt_pe
chrI	955531	955682	8.73	2.82	3.57	3.30	3.24	2.43	2.32	1.97	1.39	1.57	1.74	atac_wt_pe
chrI	957437	957588	22.33	12.17	24.17	23.95	21.52	18.73	44.10	25.81	18.27	16.71	13.53	atac_wt_pe
chrI	959975	960126	10.90	2.39	2.47	1.27	1.71	1.56	0.91	1.26	0.96	0.95	1.06	atac_wt_pe
chrI	961340	961491	8.18	4.39	6.49	4.86	3.28	3.36	4.00	4.23	2.62	3.24	3.12	atac_wt_pe
chrI	961544	961695	4.01	3.26	5.14	5.79	6.35	5.62	13.91	12.20	10.52	9.38	7.10	atac_wt_pe
chrI	963616	963767	3.47	2.14	3.68	1.76	1.41	1.56	0.94	0.91	0.90	0.99	0.86	atac_wt_se
chrI	963975	964126	3.34	2.78	5.67	2.67	1.88	2.05	1.78	1.47	1.07	1.17	1.40	atac_wt_pe
chrI	969147	969298	3.32	2.80	3.14	2.54	2.67	2.29	2.81	3.11	4.24	3.54	2.62	atac_glp1_se
chrI	969423	969574	9.99	3.22	4.60	2.68	2.81	2.47	2.09	2.04	2.05	2.18	2.10	atac_wt_pe
chrI	973143	973294	92.72	72.87	81.68	114.27	86.83	64.37	110.48	91.26	110.85	110.14	95.95	atac_wt_pe
chrI	973786	973937	0.86	2.93	1.12	7.42	6.69	14.71	7.70	1.18	0.68	0.84	0.94	atac_wt_pe
chrI	978265	978416	0.74	1.28	3.00	2.78	2.19	3.46	5.99	4.66	4.06	3.46	4.04	atac_wt_pe
chrI	978675	978826	1.48	1.45	1.62	4.81	4.02	1.84	1.98	2.41	2.24	2.41	1.53	atac_wt_pe
chrI	979547	979698	1.26	1.34	3.08	2.11	2.43	3.43	4.04	2.47	2.31	2.30	2.75	atac_wt_se
chrI	983080	983231	2.66	3.11	4.72	5.91	4.04	1.93	2.46	2.31	2.68	2.23	2.05	atac_wt_pe
chrI	984446	984597	1.06	2.20	4.10	2.63	2.01	4.69	9.99	9.61	8.21	6.64	5.60	atac_wt_pe
chrI	985074	985225	2.14	3.77	4.62	5.80	2.63	2.95	2.70	2.50	2.91	2.11	2.42	atac_wt_pe
chrI	985972	986123	2.16	2.64	3.16	2.35	1.56	1.85	1.49	1.34	1.39	1.82	2.33	atac_glp1_se
chrI	986797	986948	2.11	2.86	4.94	9.85	7.80	8.01	20.23	17.16	21.11	20.67	14.26	atac_wt_pe
chrI	987655	987806	1.94	2.73	4.10	7.82	6.19	5.35	9.62	9.18	13.32	11.93	8.47	atac_wt_pe
chrI	989005	989156	6.58	13.13	24.71	32.00	19.67	12.56	23.95	23.97	15.37	15.40	12.49	atac_wt_pe
chrI	990408	990559	1.93	2.14	2.58	3.67	3.39	4.24	1.17	1.46	1.16	1.14	1.13	atac_wt_pe
chrI	998486	998637	1.48	2.80	2.45	2.19	1.44	1.28	1.25	1.08	0.96	0.95	1.39	atac_wt_se
chrI	999210	999361	6.84	16.45	56.36	61.22	30.90	16.68	31.80	22.72	17.87	22.48	23.94	atac_wt_pe
chrI	999994	1000145	2.11	4.17	4.47	3.54	2.30	1.59	1.17	1.35	1.46	1.52	1.65	atac_wt_se
chrI	1000900	1001051	23.88	17.24	39.68	49.94	13.89	6.02	12.91	9.56	7.42	8.82	10.55	atac_wt_pe
chrI	1006007	1006158	4.66	4.01	4.79	4.07	2.07	1.97	2.78	2.79	2.49	2.93	3.64	atac_wt_pe
chrI	1014420	1014571	0.60	0.97	0.71	1.55	3.48	6.35	0.28	0.22	0.28	0.22	0.30	atac_wt_pe
chrI	1014580	1014731	0.83	1.17	0.94	3.02	6.15	9.92	0.42	0.45	0.56	0.51	0.49	atac_wt_se
chrI	1015051	1015202	1.45	2.53	2.80	5.58	4.62	9.28	16.36	7.68	3.88	2.44	1.68	atac_wt_pe
chrI	1016953	1017104	2.64	2.32	2.03	2.69	1.70	3.89	4.72	1.48	0.97	0.82	0.74	atac_wt_se
chrI	1017495	1017646	1.13	2.05	2.56	3.50	3.21	4.85	9.12	4.10	3.43	2.32	1.72	atac_wt_pe
chrI	1018922	1019073	3.09	2.03	2.23	2.20	1.67	2.35	2.66	1.92	1.55	1.52	1.21	atac_wt_pe
chrI	1021518	1021669	0.33	1.15	1.05	1.41	1.28	1.78	3.25	2.46	2.02	1.58	1.25	atac_glp1_se
chrI	1022186	1022337	0.98	1.40	2.33	4.51	3.34	4.90	13.27	9.29	6.25	4.46	3.00	atac_wt_pe
chrI	1029726	1029877	2.26	2.25	1.72	2.35	2.27	2.55	1.56	1.99	1.38	1.32	1.15	atac_wt_se
chrI	1030102	1030253	3.08	2.65	1.22	3.01	2.62	3.37	2.79	1.89	1.77	2.43	2.42	atac_wt_pe
chrI	1030886	1031037	3.32	3.02	2.98	3.08	3.05	4.07	2.44	2.96	3.70	4.27	3.94	atac_wt_se
chrI	1031895	1032046	1.84	3.21	2.36	2.24	3.06	3.27	6.17	4.58	2.86	3.56	3.30	atac_wt_pe
chrI	1033597	1033748	1.19	1.36	0.86	1.80	2.63	4.88	0.49	0.47	0.48	0.64	0.56	atac_wt_se
chrI	1033945	1034096	1.95	1.92	1.30	2.32	4.25	5.46	0.77	0.65	0.92	1.21	0.74	atac_wt_se
chrI	1034295	1034446	16.77	9.93	6.25	11.12	11.99	11.64	7.44	6.69	5.96	7.13	7.71	atac_wt_pe
chrI	1038262	1038413	0.95	0.94	0.88	2.25	3.37	4.35	0.28	0.34	0.36	0.50	0.36	atac_wt_se
chrI	1041021	1041172	0.46	0.87	0.40	0.82	1.44	2.42	0.29	0.25	0.20	0.50	0.49	atac_wt_se
chrI	1046390	1046541	1.50	1.79	1.67	1.63	1.38	1.51	0.91	1.29	2.56	2.47	1.59	atac_glp1_se
chrI	1049227	1049378	4.21	9.09	7.76	17.74	12.51	13.38	28.91	19.11	31.61	31.88	28.50	atac_wt_pe
chrI	1050439	1050590	1.57	2.52	2.12	3.16	2.43	2.48	3.87	2.85	3.56	3.34	4.69	atac_glp1_se
chrI	1051893	1052044	2.08	2.31	1.95	2.86	2.73	4.07	5.23	6.15	8.59	8.31	6.23	atac_glp1_se
chrI	1052224	1052375	0.69	1.93	1.30	2.16	3.30	5.52	7.35	7.67	12.90	12.49	10.90	atac_wt_pe
chrI	1053703	1053854	28.60	24.58	31.14	26.93	15.20	9.31	23.53	27.10	24.09	29.34	31.92	atac_wt_pe
chrI	1062079	1062230	35.84	68.07	145.29	72.28	57.49	27.86	63.49	78.31	54.30	58.06	61.21	atac_wt_pe
chrI	1067065	1067216	9.93	8.20	4.49	9.38	6.64	5.61	9.06	8.16	12.54	13.60	14.14	atac_wt_pe
chrI	1068179	1068330	122.84	137.42	249.58	158.91	160.90	89.22	208.50	212.89	159.92	167.18	143.83	atac_wt_pe
chrI	1068402	1068553	156.73	165.41	304.86	178.40	174.54	94.65	219.45	224.78	171.39	183.27	166.15	atac_wt_pe
chrI	1069243	1069394	29.65	34.99	51.93	38.02	27.29	14.02	21.38	18.08	13.31	15.25	19.40	atac_wt_pe
chrI	1069666	1069817	17.13	27.92	54.25	37.23	30.47	24.80	50.83	48.52	37.05	42.07	42.68	atac_wt_pe
chrI	1070008	1070159	37.79	47.32	82.74	45.01	34.90	22.67	57.80	50.00	42.47	52.44	52.85	atac_wt_pe
chrI	1077334	1077485	12.47	8.53	7.63	7.29	6.07	5.61	11.51	12.08	9.15	8.43	8.78	atac_wt_pe
chrI	1082504	1082655	0.25	0.56	0.31	0.55	0.91	1.85	0.18	0.28	0.25	0.28	0.34	atac_wt_se
chrI	1090418	1090569	3.90	3.05	2.71	2.20	2.04	2.17	0.79	0.94	0.80	0.78	0.92	atac_wt_se
chrI	1095642	1095793	3.41	3.34	2.13	2.28	1.34	1.55	1.12	1.28	1.20	1.02	1.51	atac_wt_se
chrI	1096048	1096199	26.20	18.38	16.67	17.50	11.55	14.39	27.05	17.36	24.41	24.03	25.53	atac_wt_pe
chrI	1099193	1099344	2.73	2.90	3.46	3.00	2.64	2.60	2.90	2.98	2.32	3.20	3.99	atac_wt_pe
chrI	1100709	1100860	17.18	9.47	19.22	12.10	10.62	6.53	9.37	8.53	6.22	7.17	9.50	atac_wt_pe
chrI	1102268	1102419	1.57	1.65	1.06	0.91	1.22	1.70	1.77	1.86	1.58	1.94	1.68	atac_glp1_se
chrI	1103392	1103543	1.84	1.80	1.92	1.47	1.08	1.66	2.77	2.02	1.78	2.68	2.97	atac_wt_pe
chrI	1106517	1106668	1.30	2.41	2.63	3.22	3.79	2.89	4.18	3.07	2.92	3.00	2.68	atac_wt_pe
chrI	1110597	1110748	8.17	2.47	2.21	1.91	1.53	2.12	0.89	0.85	0.70	1.21	1.04	atac_wt_pe
chrI	1112332	1112483	0.52	1.56	0.59	1.41	1.34	1.19	1.24	1.58	1.46	1.97	3.44	atac_glp1_se
chrI	1119269	1119420	1.11	1.49	0.76	3.35	2.90	5.06	5.83	1.74	1.86	1.83	2.48	atac_wt_pe
chrI	1125001	1125152	5.04	1.82	1.33	1.20	1.61	1.83	1.49	1.14	1.20	1.68	1.66	atac_wt_pe
chrI	1126314	1126465	4.23	2.02	1.24	1.20	1.28	1.47	0.92	0.89	0.80	0.75	0.92	atac_wt_pe
chrI	1127094	1127245	4.32	3.22	2.98	2.81	2.10	2.36	1.56	1.56	1.05	1.03	1.41	atac_wt_se
chrI	1128200	1128351	6.45	3.80	5.16	3.51	3.68	2.14	2.09	1.45	1.43	1.30	1.50	atac_wt_pe
chrI	1130854	1131005	3.67	2.17	1.96	1.47	1.51	1.33	0.65	0.68	0.47	0.78	0.85	atac_wt_se
chrI	1132012	1132163	5.36	2.63	3.02	1.70	1.44	1.78	1.07	0.99	0.91	0.84	0.97	atac_wt_pe
chrI	1135517	1135668	5.93	2.13	1.91	1.67	1.69	2.12	1.76	1.82	1.15	1.20	1.22	atac_wt_pe
chrI	1139911	1140062	1.75	2.42	0.73	1.06	0.74	1.29	3.69	2.25	3.18	2.93	3.15	atac_wt_pe
chrI	1150223	1150374	5.38	2.10	2.30	1.92	2.64	2.14	4.36	2.91	2.07	1.76	1.91	atac_glp1_se
chrI	1153156	1153307	0.78	0.88	0.78	4.26	8.48	10.71	0.35	0.33	0.36	0.28	0.23	atac_wt_pe
chrI	1153392	1153543	0.82	1.08	0.57	4.41	7.70	11.12	0.51	0.48	0.48	0.51	0.25	atac_wt_pe
chrI	1156107	1156258	22.68	21.18	17.12	31.66	29.13	28.40	29.15	26.35	28.92	31.78	28.20	atac_wt_pe
chrI	1156703	1156854	3.80	4.48	3.56	4.12	6.76	8.69	3.04	3.75	3.68	3.66	2.79	atac_wt_pe
chrI	1157560	1157711	1.80	2.77	1.90	3.01	4.21	6.30	1.08	1.29	1.70	1.48	1.46	atac_wt_se
chrI	1159118	1159269	1.75	1.50	2.09	2.29	2.69	3.30	3.74	2.19	2.74	2.60	2.51	atac_wt_pe
chrI	1161681	1161832	1.38	1.34	1.31	1.06	1.29	1.61	3.64	4.77	4.95	3.96	2.83	atac_glp1_se
chrI	1166356	1166507	3.02	2.39	2.43	2.00	1.67	1.87	2.14	2.49	2.51	3.10	3.23	atac_glp1_se
chrI	1174913	1175064	0.95	0.70	0.28	0.44	0.59	1.43	1.19	0.75	1.60	2.22	2.07	atac_glp1_se
chrI	1175406	1175557	3.08	3.38	1.88	2.85	2.94	3.26	1.46	1.59	1.18	1.37	1.12	atac_wt_se
chrI	1175792	1175943	9.01	10.22	6.57	17.93	14.18	14.94	16.82	14.17	13.14	13.55	13.26	atac_wt_pe
chrI	1183916	1184067	1.82	1.56	1.12	1.01	0.70	0.96	1.73	1.07	1.21	1.38	1.41	atac_glp1_se
chrI	1199481	1199632	0.84	0.81	0.42	0.46	0.47	0.63	3.09	3.05	4.37	5.08	4.28	atac_wt_pe
chrI	1217333	1217484	2.77	1.84	2.93	5.23	7.20	1.86	1.22	1.01	0.86	0.68	0.99	atac_wt_pe
chrI	1218551	1218702	3.34	2.60	2.75	3.34	3.73	1.96	1.24	1.15	0.81	0.91	1.11	atac_wt_se
chrI	1226276	1226427	1.68	3.66	6.04	7.02	6.10	7.37	13.03	7.75	7.37	6.91	6.38	atac_wt_pe
chrI	1226645	1226796	3.05	3.94	4.74	5.45	5.37	5.15	8.68	4.77	4.08	4.04	4.05	atac_wt_pe
chrI	1227880	1228031	4.88	12.87	13.77	18.27	14.61	10.35	33.57	31.53	33.67	29.42	26.56	atac_wt_pe
chrI	1228613	1228764	1.22	3.56	1.78	2.15	3.22	2.41	6.10	4.22	4.03	4.54	4.55	atac_wt_se
chrI	1229334	1229485	49.81	61.80	89.70	96.03	84.42	67.05	150.85	145.17	160.28	138.38	116.83	atac_wt_pe
chrI	1229733	1229884	2.25	5.68	5.63	4.86	4.93	7.19	13.85	11.41	11.30	11.61	10.65	atac_wt_se
chrI	1230479	1230630	3.98	8.39	8.11	8.96	8.19	6.59	10.22	9.84	9.30	8.88	7.28	atac_wt_pe
chrI	1230849	1231000	1.59	3.84	3.04	2.19	3.01	3.61	5.30	4.22	3.89	3.24	4.07	atac_wt_pe
chrI	1231507	1231658	0.72	1.85	1.05	1.02	1.05	1.72	2.08	1.74	1.28	1.21	1.95	atac_glp1_se
chrI	1241388	1241539	2.72	1.95	1.34	1.83	1.69	2.29	0.90	0.91	0.97	0.90	1.41	atac_wt_pe
chrI	1251575	1251726	63.69	36.58	49.49	48.36	42.91	27.05	80.50	74.41	67.66	67.67	70.63	atac_wt_pe
chrI	1256066	1256217	9.46	2.30	3.67	14.00	14.58	1.49	1.79	0.95	1.09	1.23	1.14	atac_wt_pe
chrI	1257881	1258032	2.41	1.82	1.72	4.06	3.55	1.41	1.12	1.16	0.79	0.97	1.19	atac_wt_se
chrI	1258566	1258717	3.27	2.76	2.51	3.51	3.18	1.90	2.05	1.69	2.06	2.07	2.11	atac_wt_pe
chrI	1259494	1259645	2.61	2.03	1.60	1.74	1.29	1.35	0.81	1.04	0.74	1.02	0.98	atac_wt_se
chrI	1261628	1261779	10.27	7.46	6.45	8.09	8.39	4.95	11.75	10.57	9.41	10.86	11.81	atac_wt_pe
chrI	1264083	1264234	1.58	1.79	1.73	2.00	2.17	2.06	3.41	3.40	3.53	3.17	2.57	atac_glp1_se
chrI	1269328	1269479	0.87	2.03	1.34	1.57	1.20	1.45	1.39	2.40	2.61	2.83	3.47	atac_glp1_se
chrI	1271079	1271230	22.52	21.81	37.04	52.04	45.03	14.93	26.33	27.52	23.62	20.99	22.56	atac_wt_pe
chrI	1271436	1271587	5.43	7.03	8.07	17.05	17.43	3.22	3.45	4.47	3.99	3.23	2.88	atac_wt_se
chrI	1272552	1272703	6.76	8.34	14.20	11.10	7.93	3.42	5.90	7.91	7.65	7.42	9.24	atac_wt_pe
chrI	1273863	1274014	9.61	25.62	29.83	25.92	21.86	21.06	46.44	37.53	46.70	42.91	49.57	atac_wt_pe
chrI	1274036	1274187	7.19	19.36	22.87	21.08	14.75	16.08	38.85	34.80	38.12	35.76	40.86	atac_wt_pe
chrI	1288804	1288955	32.99	12.58	11.21	12.98	8.53	7.74	11.03	8.13	9.44	10.76	8.95	atac_wt_pe
chrI	1290465	1290616	3.02	3.27	2.93	2.25	2.35	1.84	3.18	3.49	3.13	3.46	3.57	atac_wt_pe
chrI	1291281	1291432	0.67	1.18	0.92	0.64	1.06	1.17	1.30	1.43	1.39	2.00	2.54	atac_glp1_se
chrI	1294230	1294381	1.10	1.27	1.37	1.77	1.67	2.01	4.04	3.88	4.76	5.98	6.11	atac_glp1_se
chrI	1295550	1295701	13.60	15.08	8.33	14.81	10.26	6.26	12.40	7.17	7.41	8.17	11.06	atac_wt_pe
chrI	1296640	1296791	14.81	24.79	16.98	40.73	39.87	19.66	55.97	37.73	43.43	43.46	45.70	atac_wt_pe
chrI	1298908	1299059	0.71	1.73	1.77	2.80	2.77	3.48	9.13	4.72	6.19	4.65	4.35	atac_wt_pe
chrI	1300092	1300243	7.28	5.72	8.71	11.45	10.24	5.00	11.66	7.10	8.39	8.74	10.47	atac_wt_pe
chrI	1301568	1301719	2.99	4.86	8.21	10.79	13.04	10.80	26.87	16.48	21.10	17.37	16.82	atac_wt_pe
chrI	1303014	1303165	0.52	1.02	0.97	1.20	1.07	1.09	2.00	1.53	1.31	1.26	0.79	atac_glp1_se
chrI	1304082	1304233	1.50	2.19	2.72	2.46	2.77	2.40	2.98	3.28	2.75	2.91	3.00	atac_wt_pe
chrI	1304333	1304484	0.68	1.73	1.63	1.20	1.65	2.02	3.05	2.61	2.95	2.84	2.83	atac_wt_pe
chrI	1305334	1305485	4.32	3.34	3.59	2.64	3.38	2.66	2.36	2.21	2.54	2.85	4.01	atac_wt_pe
chrI	1305727	1305878	3.85	1.74	2.00	1.39	2.12	1.21	1.48	1.56	1.17	1.53	1.74	atac_wt_se
chrI	1311072	1311223	3.29	2.28	2.65	2.13	1.88	2.01	1.25	1.39	1.62	1.85	1.91	atac_wt_se
chrI	1312905	1313056	3.33	2.66	3.27	3.39	4.10	2.20	3.05	2.31	2.51	3.06	4.50	atac_wt_pe
chrI	1313681	1313832	2.95	4.53	5.42	4.62	4.21	2.65	4.63	3.60	3.02	5.32	5.58	atac_wt_pe
chrI	1315549	1315700	27.69	12.65	20.47	14.91	18.02	8.05	13.65	12.01	11.03	12.74	16.36	atac_wt_pe
chrI	1316145	1316296	3.61	3.67	3.71	3.33	3.93	2.39	1.66	1.97	1.52	1.69	1.72	atac_wt_pe
chrI	1317086	1317237	4.33	3.06	4.20	2.93	3.19	2.96	1.84	1.83	1.75	1.76	2.24	atac_wt_pe
chrI	1322043	1322194	3.74	2.90	2.70	3.01	2.04	2.42	2.04	2.15	2.73	2.11	2.45	atac_wt_pe
chrI	1327936	1328087	1.88	2.36	2.77	2.26	2.31	2.19	1.69	1.86	1.74	1.25	1.30	atac_wt_se
chrI	1331184	1331335	2.64	2.34	1.76	3.28	2.82	5.52	2.94	1.51	1.24	1.15	1.38	atac_wt_pe
chrI	1335234	1335385	2.34	2.60	3.19	5.17	5.71	5.81	15.53	10.41	10.41	9.11	7.22	atac_wt_pe
chrI	1336773	1336924	0.95	1.08	0.94	1.49	1.35	1.75	3.10	1.98	2.25	2.18	2.03	atac_glp1_se
chrI	1339709	1339860	1.84	1.98	1.19	2.05	2.86	3.82	2.46	2.42	3.29	3.08	2.88	atac_wt_se
chrI	1340096	1340247	17.64	13.81	8.84	21.53	16.24	16.42	21.41	15.73	16.91	19.68	19.42	atac_wt_pe
chrI	1340525	1340676	5.32	3.46	2.86	3.93	3.82	6.31	4.03	2.98	3.09	3.54	3.58	atac_wt_se
chrI	1340986	1341137	10.79	4.11	2.40	3.43	4.61	6.39	2.57	2.59	2.64	2.56	2.11	atac_wt_pe
chrI	1341378	1341529	2.19	2.87	1.55	3.09	2.61	4.91	1.64	1.08	1.57	1.47	1.21	atac_wt_se
chrI	1342174	1342325	2.37	2.51	2.49	2.84	2.81	4.54	1.51	1.81	1.46	1.55	1.27	atac_wt_pe
chrI	1346214	1346365	0.56	1.70	0.96	2.34	2.49	3.12	7.08	5.12	5.81	5.51	5.10	atac_wt_pe
chrI	1356523	1356674	1.32	1.61	0.86	1.09	0.81	0.93	0.40	0.60	0.77	0.70	0.61	atac_wt_se
chrI	1359580	1359731	0.63	0.67	0.51	0.56	0.67	1.08	1.70	1.93	2.18	2.32	2.85	atac_glp1_se
chrI	1360192	1360343	0.42	0.76	0.56	2.11	3.00	5.78	0.57	0.57	0.46	0.41	0.54	atac_wt_pe
chrI	1361301	1361452	35.86	64.12	82.62	90.07	64.74	45.53	114.91	97.12	107.97	101.05	99.15	atac_wt_pe
chrI	1363708	1363859	0.44	1.52	0.94	0.96	1.41	1.63	2.44	1.45	1.88	2.65	3.34	atac_glp1_se
chrI	1365425	1365576	4.14	3.97	5.46	4.42	4.37	2.98	4.14	4.04	3.57	4.73	6.00	atac_wt_pe
chrI	1368822	1368973	2.38	1.63	2.73	4.22	7.43	8.27	14.10	7.64	8.91	10.00	16.63	atac_wt_pe
chrI	1371187	1371338	2.25	2.29	1.87	2.44	2.36	2.65	2.77	2.38	3.00	2.84	3.65	atac_glp1_se
chrI	1392560	1392711	8.87	2.79	3.73	2.46	2.57	2.79	1.80	2.13	2.06	1.56	1.54	atac_wt_se
chrI	1392915	1393066	25.56	8.42	9.99	11.76	8.56	6.74	14.55	13.10	9.80	10.50	10.78	atac_wt_pe
chrI	1394261	1394412	2.15	2.05	1.86	4.58	9.00	13.31	4.01	4.31	8.00	9.53	8.01	atac_wt_pe
chrI	1410014	1410165	1.65	2.02	1.85	4.69	3.80	7.63	11.77	2.48	6.69	6.92	8.55	atac_wt_pe
chrI	1415520	1415671	2.07	1.77	1.31	1.76	2.75	3.11	1.46	1.41	1.02	1.24	1.24	atac_wt_se
chrI	1415944	1416095	17.17	13.82	13.93	22.10	29.40	32.49	24.24	23.91	23.92	26.96	24.89	atac_wt_pe
chrI	1416102	1416253	24.51	18.61	19.42	30.73	32.76	37.55	37.06	33.76	36.44	34.60	35.72	atac_wt_pe
chrI	1425242	1425393	9.84	7.27	4.37	6.76	5.68	6.84	10.83	8.87	6.87	7.25	7.28	atac_wt_pe
chrI	1426162	1426313	0.93	1.87	1.01	1.24	1.27	1.72	2.12	1.38	1.55	1.86	2.36	atac_glp1_se
chrI	1435235	1435386	18.45	13.69	17.18	16.57	21.52	15.40	28.59	29.59	25.10	26.84	24.52	atac_wt_pe
chrI	1435592	1435743	30.67	28.90	27.24	40.94	39.52	36.44	60.18	53.59	51.11	52.70	48.59	atac_wt_pe
chrI	1444209	1444360	26.06	30.25	39.70	47.72	32.63	28.54	39.81	36.41	34.26	41.07	50.04	atac_wt_pe
chrI	1447004	1447155	69.31	46.45	63.98	109.78	102.13	111.37	144.78	107.94	134.10	128.57	151.32	atac_wt_pe
chrI	1451574	1451725	8.15	1.76	1.65	1.21	1.19	2.11	0.71	0.85	0.73	0.72	0.72	atac_wt_pe
chrI	1453076	1453227	3.07	2.21	1.93	1.40	1.88	1.94	4.27	2.40	2.61	2.52	2.85	atac_glp1_se
chrI	1455334	1455485	2.05	2.25	2.07	4.98	4.41	7.00	1.09	0.86	0.77	0.93	1.01	atac_wt_pe
chrI	1459069	1459220	2.07	3.12	4.84	3.44	3.44	3.84	4.46	3.70	3.97	4.60	5.50	atac_wt_pe
chrI	1471123	1471274	7.73	8.95	14.01	13.55	10.54	6.22	9.36	9.02	7.54	10.96	14.29	atac_wt_pe
chrI	1476656	1476807	0.57	1.20	0.68	1.15	1.09	1.33	0.83	0.86	0.98	1.59	2.40	atac_glp1_se
chrI	1479352	1479503	2.08	1.83	1.62	1.79	1.23	1.28	1.38	1.84	2.27	2.22	1.72	atac_glp1_se
chrI	1481610	1481761	97.01	55.11	94.19	74.90	35.07	23.21	44.97	45.82	37.55	51.02	56.29	atac_wt_pe
chrI	1482827	1482978	2.54	3.35	3.22	2.29	1.73	2.02	1.45	1.56	1.48	1.63	2.14	atac_wt_pe
chrI	1493530	1493681	2.25	4.03	3.24	3.32	4.01	5.71	19.50	14.85	14.74	16.36	16.34	atac_wt_pe
chrI	1508675	1508826	1.02	0.97	0.41	0.75	0.77	2.34	0.38	0.28	0.29	0.18	0.47	atac_wt_pe
chrI	1514521	1514672	2.69	2.06	1.07	1.78	1.98	2.35	2.63	1.98	2.03	3.10	2.78	atac_glp1_se
chrI	1535737	1535888	4.08	2.82	2.37	1.85	1.59	1.99	1.12	1.64	1.82	1.69	1.85	atac_wt_pe
chrI	1537259	1537410	1.44	1.70	1.90	1.65	1.82	1.74	2.70	3.07	3.90	5.81	10.56	atac_glp1_se
chrI	1537928	1538079	2.12	1.89	1.25	1.00	0.82	1.21	1.05	0.96	1.14	1.41	1.79	atac_wt_pe
chrI	1539006	1539157	0.96	1.25	0.84	1.11	1.65	1.72	2.82	2.03	1.88	2.05	3.26	atac_glp1_se
chrI	1540594	1540745	37.91	46.67	67.81	51.71	43.60	33.64	75.96	65.55	65.52	71.05	69.50	atac_wt_pe
chrI	1540896	1541047	1.84	7.86	11.07	8.22	7.30	11.25	23.57	26.18	32.27	34.85	31.15	atac_wt_pe
chrI	1541460	1541611	0.28	2.01	0.66	1.14	0.90	1.47	3.17	3.01	3.37	3.33	3.52	atac_glp1_se
chrI	1548249	1548400	4.92	2.50	4.61	4.61	4.11	3.01	5.31	3.55	3.04	3.04	3.58	atac_wt_pe
chrI	1557436	1557587	3.10	2.12	2.02	2.83	2.62	4.50	1.26	1.22	1.34	1.43	1.81	atac_wt_pe
chrI	1558571	1558722	1.03	1.82	1.14	1.49	3.08	7.95	0.90	0.74	0.88	0.79	0.89	atac_wt_pe
chrI	1559174	1559325	97.17	41.98	53.02	66.98	55.99	32.12	59.49	54.12	50.17	51.96	51.19	atac_wt_pe
chrI	1562641	1562792	21.90	13.12	18.42	17.62	15.80	9.80	24.94	21.14	21.26	21.07	22.84	atac_wt_pe
chrI	1564114	1564265	6.60	5.83	10.05	10.22	9.65	4.80	7.20	5.83	6.44	7.64	11.56	atac_wt_pe
chrI	1565223	1565374	1.37	4.94	3.94	3.38	3.41	3.41	8.33	4.94	4.64	5.87	8.84	atac_wt_pe
chrI	1574235	1574386	1.62	1.76	1.71	1.59	1.40	1.55	0.89	1.14	1.56	2.11	2.63	atac_glp1_se
chrI	1575622	1575773	13.64	9.02	8.05	16.85	14.26	16.64	25.42	13.59	16.79	18.47	19.63	atac_wt_pe
chrI	1581221	1581372	1.06	1.69	1.51	2.39	3.46	3.52	8.20	6.49	7.78	8.11	6.12	atac_wt_pe
chrI	1582021	1582172	2.40	3.82	4.88	3.73	2.36	2.30	2.83	2.83	2.06	2.70	3.68	atac_wt_pe
chrI	1583400	1583551	5.73	2.81	3.22	2.22	1.35	1.47	0.96	1.50	1.00	1.72	2.03	atac_wt_pe
chrI	1585153	1585304	6.48	6.52	7.97	5.95	7.13	4.48	6.49	5.21	3.89	4.91	6.68	atac_wt_pe
chrI	1588221	1588372	10.59	12.06	11.04	16.46	11.85	11.52	25.74	20.18	20.32	19.82	17.44	atac_wt_pe
chrI	1596598	1596749	1.07	1.86	1.63	1.00	1.05	1.12	1.97	1.42	1.37	1.45	2.12	atac_glp1_se
chrI	1598560	1598711	5.58	14.64	21.20	11.96	7.04	5.30	10.47	12.83	9.85	15.26	15.75	atac_wt_pe
chrI	1610116	1610267	9.78	4.39	2.73	7.02	4.77	5.79	4.78	3.37	3.25	4.57	4.15	atac_wt_pe
chrI	1626490	1626641	1.37	1.87	1.81	2.18	2.23	1.98	2.32	2.07	2.09	2.24	2.01	atac_wt_pe
chrI	1628637	1628788	6.06	12.23	12.70	16.39	18.66	18.27	42.18	33.80	40.42	39.65	42.59	atac_wt_pe
chrI	1634527	1634678	3.35	2.07	2.48	4.53	8.61	2.23	3.81	2.28	1.00	1.07	1.33	atac_wt_pe
chrI	1636521	1636672	0.97	1.07	0.66	1.33	2.04	0.66	0.46	0.26	0.41	0.35	0.46	atac_wt_pe
chrI	1641390	1641541	2.83	1.86	1.46	1.46	2.07	1.62	0.56	0.58	0.51	0.73	0.85	atac_wt_pe
chrI	1651382	1651533	85.65	44.65	51.69	45.73	29.93	20.98	31.35	27.93	21.37	26.10	26.25	atac_wt_pe
chrI	1656779	1656930	2.85	1.89	2.30	1.74	2.06	1.75	2.34	2.20	1.55	1.51	1.61	atac_glp1_se
chrI	1667364	1667515	1.71	1.79	1.33	2.08	5.13	1.41	1.82	1.12	0.88	0.78	0.99	atac_wt_pe
chrI	1669118	1669269	2.17	2.39	2.45	4.21	4.33	6.44	1.22	1.07	0.86	1.03	0.95	atac_wt_pe
chrI	1672398	1672549	4.74	9.07	6.79	19.22	14.96	24.14	11.93	7.64	9.16	9.09	8.86	atac_wt_pe
chrI	1676588	1676739	25.58	18.29	18.24	24.77	19.96	11.36	14.87	13.37	12.95	15.32	17.93	atac_wt_pe
chrI	1677539	1677690	0.81	1.11	0.88	1.43	1.29	1.77	2.64	1.56	1.97	1.95	1.97	atac_glp1_se
chrI	1678984	1679135	2.65	1.98	1.96	2.06	2.06	2.91	5.87	3.66	3.09	3.17	3.13	atac_wt_pe
chrI	1680384	1680535	1.60	2.20	2.31	1.55	2.12	2.12	2.63	2.56	2.34	3.07	4.01	atac_glp1_se
chrI	1686251	1686402	2.02	2.26	2.14	2.13	1.59	2.27	3.98	3.36	4.58	3.68	2.91	atac_glp1_se
chrI	1687744	1687895	5.57	6.73	6.71	10.21	8.94	14.04	48.74	49.33	40.04	34.29	27.28	atac_wt_pe
chrI	1688945	1689096	1.06	2.01	2.32	2.65	2.31	2.80	9.94	12.95	15.66	12.93	13.70	atac_wt_pe
chrI	1691112	1691263	18.77	9.44	22.86	35.64	26.87	17.37	52.59	43.80	45.32	47.60	44.68	atac_wt_pe
chrI	1691395	1691546	32.57	20.70	41.73	38.70	30.82	20.17	48.76	53.61	47.08	51.64	43.36	atac_wt_pe
chrI	1693025	1693176	10.11	4.21	8.88	8.20	3.00	2.72	4.23	2.76	2.39	3.09	3.29	atac_wt_pe
chrI	1693242	1693393	5.77	5.66	14.64	15.19	3.77	3.90	10.32	5.60	5.55	6.91	7.07	atac_wt_pe
chrI	1695158	1695309	30.43	20.33	23.53	30.90	25.54	13.68	34.13	37.07	43.47	40.51	42.15	atac_wt_pe
chrI	1697076	1697227	1.24	0.90	0.83	1.15	1.38	1.91	3.03	3.41	3.55	2.35	2.60	atac_wt_pe
chrI	1697993	1698144	283.10	219.93	318.62	294.22	221.59	140.71	292.28	283.32	279.57	257.84	236.07	atac_wt_pe
chrI	1701838	1701989	17.60	14.24	11.32	19.88	18.88	18.69	20.12	16.38	15.21	16.81	17.91	atac_wt_pe
chrI	1715207	1715358	2.15	1.76	2.16	1.90	2.13	2.30	1.10	1.41	1.30	1.53	1.87	atac_wt_pe
chrI	1717510	1717661	61.13	34.45	37.42	53.10	46.47	39.26	78.77	64.25	71.81	66.67	56.81	atac_wt_pe
chrI	1719151	1719302	58.85	32.34	47.44	30.09	25.81	19.89	35.26	31.58	26.21	25.33	27.31	atac_wt_pe
chrI	1720665	1720816	11.31	10.12	17.94	9.83	9.73	5.89	7.86	6.63	5.99	6.04	6.77	atac_wt_pe
chrI	1721587	1721738	3.54	2.82	2.72	2.06	1.92	1.48	1.31	1.40	1.05	1.17	1.17	atac_wt_se
chrI	1722650	1722801	2.98	2.28	1.97	3.14	2.70	3.02	1.12	1.18	1.14	1.32	1.38	atac_wt_se
chrI	1728929	1729080	2.15	1.60	1.88	1.60	1.32	1.50	2.35	1.54	1.37	1.56	1.75	atac_glp1_se
chrI	1729647	1729798	7.73	2.59	2.96	9.53	10.99	2.33	1.55	1.53	1.08	1.16	1.44	atac_wt_pe
chrI	1731062	1731213	6.48	2.90	2.75	2.47	2.38	1.86	1.27	1.54	1.33	1.33	1.52	atac_wt_pe
chrI	1740765	1740916	0.70	1.85	1.12	2.00	2.15	2.55	3.11	2.66	2.52	1.66	1.07	atac_glp1_se
chrI	1751082	1751233	1.89	1.16	0.48	1.57	1.09	2.00	0.88	0.80	0.78	1.32	1.46	atac_wt_pe
chrI	1774660	1774811	3.21	1.95	1.55	1.78	1.85	1.48	2.83	2.96	2.15	3.07	3.64	atac_glp1_se
chrI	1777441	1777592	13.17	3.23	6.46	14.68	19.02	2.71	2.86	3.10	2.37	1.92	1.87	atac_wt_pe
chrI	1778779	1778930	11.90	9.05	15.44	15.42	21.01	12.00	26.20	30.07	26.59	22.30	20.72	atac_wt_pe
chrI	1791809	1791960	1.08	1.93	1.09	1.11	1.39	1.57	0.83	0.89	1.18	1.14	0.97	atac_wt_pe
chrI	1792634	1792785	13.28	14.27	10.78	19.11	19.42	12.81	23.48	24.03	25.45	20.27	17.23	atac_wt_pe
chrI	1793072	1793223	2.24	2.36	1.76	1.34	1.78	1.63	2.30	2.19	2.28	2.53	2.23	atac_wt_se
chrI	1797275	1797426	2.98	3.39	2.42	3.93	3.53	3.85	2.61	2.71	4.51	3.06	3.13	atac_wt_pe
chrI	1800166	1800317	3.07	2.54	2.85	3.96	4.11	7.55	1.24	1.21	1.25	1.10	0.83	atac_wt_pe
chrI	1807963	1808114	11.65	20.65	25.49	18.73	8.81	6.89	16.11	18.42	12.02	19.32	20.78	atac_wt_pe
chrI	1808646	1808797	2.01	3.30	2.28	2.27	2.36	2.74	1.23	1.50	1.08	1.67	2.18	atac_wt_pe
chrI	1809754	1809905	3.14	4.56	4.30	5.01	3.71	4.49	3.32	3.40	2.28	2.70	2.84	atac_wt_pe
chrI	1815939	1816090	1.15	1.12	1.03	1.43	1.38	1.51	2.95	2.87	2.37	4.01	4.58	atac_glp1_se
chrI	1823038	1823189	5.81	3.58	4.06	5.18	9.83	10.59	4.29	3.64	3.37	3.99	4.07	atac_wt_pe
chrI	1823210	1823361	14.69	10.43	11.04	12.67	19.93	20.89	11.95	11.03	9.45	11.15	11.75	atac_wt_pe
chrI	1825964	1826115	1.19	0.86	1.24	1.79	2.27	2.98	2.99	2.81	1.56	1.22	1.51	atac_wt_pe
chrI	1826205	1826356	0.94	1.09	0.73	0.76	1.38	1.88	1.20	1.15	0.61	0.87	0.85	atac_wt_pe
chrI	1832205	1832356	1.92	2.82	2.47	3.01	3.32	3.53	0.96	1.53	1.46	1.37	1.22	atac_wt_se
chrI	1832613	1832764	17.41	14.22	9.82	17.15	15.82	17.62	15.80	14.66	15.32	20.00	17.84	atac_wt_pe
chrI	1834889	1835040	9.55	8.66	6.45	7.97	9.35	14.74	3.27	3.26	3.60	4.21	3.75	atac_wt_se
chrI	1835095	1835246	11.29	10.34	10.93	10.40	11.79	17.12	4.94	5.54	6.62	6.42	5.96	atac_wt_pe
chrI	1835533	1835684	191.79	159.09	184.18	214.17	158.92	122.17	201.84	200.12	191.03	180.91	166.73	atac_wt_pe
chrI	1836212	1836363	18.82	16.05	34.57	29.86	33.04	32.09	52.12	46.20	40.39	36.83	30.39	atac_wt_pe
chrI	1836350	1836501	76.97	58.15	108.09	84.64	69.66	52.13	75.81	84.67	65.75	65.37	64.97	atac_glp1_se
chrI	1836469	1836620	105.26	69.45	127.93	95.83	75.03	52.13	75.81	87.90	71.25	75.75	76.52	atac_wt_pe
chrI	1836782	1836933	276.77	197.09	345.43	253.53	215.88	138.40	249.62	253.93	244.48	241.67	236.01	atac_wt_pe
chrI	1836993	1837144	219.99	169.29	298.88	217.82	173.35	109.99	207.52	216.33	202.18	199.55	194.31	atac_wt_pe
chrI	1837679	1837830	2.04	4.21	2.44	3.16	3.09	2.69	2.77	2.41	3.02	2.72	3.50	atac_glp1_se
chrI	1839749	1839900	6.28	4.46	3.67	5.69	5.83	4.67	5.01	4.13	3.63	3.51	3.78	atac_wt_pe
chrI	1840860	1841011	4.08	3.39	3.69	5.68	6.21	4.35	4.06	2.51	2.62	2.43	2.84	atac_wt_pe
chrI	1841203	1841354	2.99	2.48	2.30	3.23	3.36	3.44	4.77	2.96	2.50	2.26	2.90	atac_wt_se
chrI	1842009	1842160	17.19	19.06	13.47	24.34	22.13	22.23	28.49	21.40	24.99	26.76	25.30	atac_wt_pe
chrI	1842435	1842586	2.20	2.65	1.74	2.66	2.80	3.53	1.11	1.32	1.68	1.28	1.57	atac_wt_se
chrI	1845024	1845175	12.90	8.72	5.23	11.21	17.71	11.12	22.17	25.33	23.52	19.29	15.74	atac_wt_pe
chrI	1852707	1852858	6.29	2.55	2.11	6.78	4.45	9.14	1.58	1.71	1.47	1.55	0.97	atac_wt_pe
chrI	1853010	1853161	8.28	2.86	1.92	5.27	4.40	12.55	1.77	1.36	1.78	2.18	1.40	atac_wt_pe
chrI	1861842	1861993	27.70	17.45	9.04	20.28	15.42	11.81	21.41	15.54	11.02	12.89	11.20	atac_wt_pe
chrI	1869124	1869275	1.29	1.79	1.48	2.18	1.80	1.08	1.54	1.41	1.05	1.35	1.74	atac_wt_se
chrI	1870848	1870999	1.90	2.17	2.93	2.03	1.73	1.60	2.19	2.02	1.63	2.54	3.31	atac_wt_pe
chrI	1872350	1872501	0.49	0.98	0.61	1.31	3.51	4.86	2.00	3.28	3.43	2.87	3.55	atac_glp1_se
chrI	1872572	1872723	0.73	1.43	0.91	5.44	8.08	13.41	1.20	1.50	2.42	1.83	2.02	atac_wt_pe
chrI	1873860	1874011	293.32	223.88	389.47	321.95	275.64	176.09	362.99	369.07	323.34	308.37	299.82	atac_wt_pe
chrI	1874544	1874695	10.99	5.36	5.89	5.15	3.90	4.21	3.30	2.90	2.94	2.60	2.53	atac_wt_se
chrI	1876526	1876677	3.01	2.99	3.16	2.67	2.34	2.65	2.26	3.77	3.60	3.04	3.15	atac_wt_se
chrI	1877774	1877925	3.58	6.59	10.64	8.88	9.03	8.31	16.94	16.85	16.51	15.86	17.74	atac_wt_pe
chrI	1878110	1878261	1.05	2.20	1.81	1.71	2.06	2.01	3.16	4.05	4.16	4.79	5.26	atac_glp1_se
chrI	1878915	1879066	1.98	1.78	1.12	1.19	1.09	1.61	2.00	2.42	2.21	1.80	2.95	atac_wt_pe
chrI	1888646	1888797	0.38	0.65	0.26	0.87	1.58	3.59	0.67	0.41	0.27	0.49	0.45	atac_wt_se
chrI	1895052	1895203	3.83	3.85	1.88	4.90	4.27	4.47	5.04	3.48	4.39	4.68	4.51	atac_wt_pe
chrI	1911723	1911874	2.29	2.63	1.63	3.33	4.56	6.45	6.51	3.81	2.19	2.36	2.55	atac_wt_se
chrI	1913986	1914137	1.89	6.37	6.64	12.57	14.55	19.71	35.00	23.54	17.32	17.13	12.53	atac_wt_pe
chrI	1915963	1916114	2.47	2.94	2.79	3.58	6.08	6.31	19.52	10.01	7.60	7.60	6.00	atac_wt_pe
chrI	1916802	1916953	1.62	2.02	1.13	1.22	1.40	1.51	3.06	2.49	1.08	1.09	1.13	atac_glp1_se
chrI	1919287	1919438	1.72	2.38	1.93	3.35	3.13	4.67	10.66	7.49	5.47	5.12	3.55	atac_wt_pe
chrI	1943238	1943389	0.65	0.96	0.61	0.56	0.95	0.94	0.56	0.96	4.75	7.85	10.45	atac_glp1_se
chrI	1958475	1958626	12.89	20.34	17.84	37.30	28.01	27.86	49.39	47.93	55.31	53.25	49.15	atac_wt_pe
chrI	1972698	1972849	4.30	2.62	2.49	2.12	2.34	2.41	1.45	2.18	1.67	1.46	1.77	atac_wt_se
chrI	1977982	1978133	2.56	1.86	1.56	1.34	2.37	3.85	1.15	1.03	1.33	1.98	1.63	atac_wt_se
chrI	1978249	1978400	1.96	1.36	0.75	1.77	2.76	3.47	1.94	1.69	1.92	2.95	3.03	atac_wt_se
chrI	1978567	1978718	2.71	2.21	1.76	2.88	3.09	3.57	3.23	2.29	3.06	2.73	2.77	atac_wt_se
chrI	1978817	1978968	0.63	0.95	0.33	0.80	0.86	1.50	2.78	1.45	2.42	3.07	2.52	atac_glp1_se
chrI	1979491	1979642	1.29	1.71	1.30	1.78	1.54	2.06	1.93	2.45	1.85	2.43	2.12	atac_glp1_se
chrI	2002398	2002549	1.13	1.58	1.05	4.18	9.02	42.95	0.66	0.76	0.64	1.17	1.08	atac_wt_pe
chrI	2011299	2011450	57.05	42.25	56.41	59.52	52.01	35.68	73.19	64.83	65.99	63.08	63.37	atac_wt_pe
chrI	2016804	2016955	2.06	2.12	1.87	2.04	1.63	1.81	2.42	1.67	3.05	4.10	9.55	atac_glp1_se
chrI	2019505	2019656	1.55	2.78	4.25	6.87	6.73	7.88	19.66	10.45	13.17	14.22	10.73	atac_wt_pe
chrI	2020052	2020203	2.72	6.39	7.00	10.53	10.93	11.12	36.57	35.71	42.84	36.64	27.83	atac_wt_pe
chrI	2021311	2021462	11.01	25.18	37.97	27.13	25.90	20.90	54.48	39.96	44.03	45.39	43.04	atac_wt_pe
chrI	2023322	2023473	0.69	2.31	1.24	1.39	1.15	1.65	5.35	5.53	4.91	3.48	3.19	atac_glp1_se
chrI	2024698	2024849	16.99	30.29	36.64	42.62	31.25	28.68	66.24	56.22	65.26	61.47	64.71	atac_wt_pe
chrI	2026128	2026279	3.06	4.53	5.85	4.18	4.02	2.72	2.64	2.65	3.19	4.02	4.42	atac_wt_pe
chrI	2034184	2034335	0.77	1.44	1.15	1.21	1.48	1.76	2.70	2.50	2.45	2.37	2.50	atac_glp1_se
chrI	2034550	2034701	2.59	1.93	2.09	1.78	2.08	2.39	2.66	2.86	2.48	2.15	2.38	atac_wt_se
chrI	2041159	2041310	5.14	2.99	2.93	5.65	6.84	14.37	9.89	11.43	13.52	11.62	9.35	atac_wt_pe
chrI	2045036	2045187	13.15	3.59	5.45	3.47	4.49	3.46	31.66	31.33	28.72	30.26	33.17	atac_wt_pe
chrI	2045218	2045369	5.69	1.90	2.18	1.59	2.09	2.03	13.19	13.08	11.48	11.88	12.94	atac_wt_pe
chrI	2047168	2047319	1.56	2.12	2.14	1.86	4.07	4.04	9.66	9.27	11.31	11.49	10.07	atac_wt_se
chrI	2049152	2049303	3.72	2.14	1.74	1.71	2.29	2.58	8.81	7.11	9.43	10.50	9.95	atac_wt_pe
chrI	2050077	2050228	2.04	1.54	1.18	1.52	1.54	1.67	4.31	3.78	4.48	4.73	4.79	atac_glp1_se
chrI	2054726	2054877	2.69	1.58	1.27	1.51	1.66	2.14	1.22	1.50	1.37	1.40	1.28	atac_wt_se
chrI	2061357	2061508	1.14	1.72	0.92	2.04	2.51	4.78	1.38	1.55	1.71	1.72	1.75	atac_wt_pe
chrI	2062627	2062778	1.90	2.06	1.38	1.93	1.62	2.59	4.99	5.72	6.11	5.50	5.09	atac_glp1_se
chrI	2064000	2064151	13.63	9.74	6.18	15.17	11.69	12.87	12.06	9.14	8.65	9.37	10.02	atac_wt_pe
chrI	2064388	2064539	3.92	3.33	2.17	3.85	4.40	4.91	2.30	2.35	2.12	2.05	2.04	atac_wt_se
chrI	2064820	2064971	6.98	4.54	2.09	9.34	13.02	7.15	8.73	12.62	7.44	4.54	3.42	atac_wt_pe
chrI	2065560	2065711	8.05	7.81	5.56	7.26	5.19	4.80	4.49	5.37	5.41	5.81	6.64	atac_wt_pe
chrI	2066860	2067011	1.69	2.02	1.52	1.74	2.85	3.50	0.96	1.50	1.58	1.45	1.41	atac_wt_se
chrI	2068962	2069113	2.49	2.72	2.76	4.72	7.53	15.50	1.85	1.65	2.49	2.54	2.28	atac_wt_pe
chrI	2069318	2069469	3.26	4.63	3.88	6.35	9.78	19.89	1.89	2.22	2.82	2.87	2.25	atac_wt_pe
chrI	2070004	2070155	4.88	4.01	4.00	4.09	6.75	8.82	2.65	3.47	3.94	3.68	3.11	atac_wt_se
chrI	2070371	2070522	5.40	5.69	4.88	6.31	9.47	11.02	3.72	4.33	4.31	4.91	4.57	atac_wt_pe
chrI	2070822	2070973	17.74	24.18	20.42	28.90	31.01	32.24	22.90	21.86	28.03	31.82	32.59	atac_wt_pe
chrI	2074564	2074715	1.60	1.67	1.29	1.26	1.72	2.07	1.37	2.19	1.95	2.24	1.68	atac_glp1_se
chrI	2076964	2077115	9.19	6.54	7.05	13.94	8.39	13.03	30.36	24.27	24.91	17.89	14.05	atac_wt_pe
chrI	2078149	2078300	0.60	1.76	1.80	2.16	3.38	5.24	7.80	4.56	4.66	4.34	4.71	atac_wt_pe
chrI	2084302	2084453	1.31	5.34	2.87	8.23	9.39	13.24	15.31	9.40	12.02	11.34	9.68	atac_wt_pe
chrI	2084936	2085087	105.16	104.14	117.26	216.64	206.91	219.63	126.03	95.58	106.52	93.45	85.97	atac_wt_pe
chrI	2086445	2086596	0.97	1.74	0.71	1.09	1.12	1.66	2.21	1.92	3.82	3.96	3.05	atac_glp1_se
chrI	2088931	2089082	11.78	2.96	3.75	2.15	1.65	2.08	1.66	2.06	1.72	1.93	1.98	atac_wt_pe
chrI	2095190	2095341	8.69	4.40	4.97	2.79	2.25	2.09	1.48	1.42	1.74	2.03	2.00	atac_wt_pe
chrI	2097021	2097172	7.23	6.99	2.77	5.68	4.61	4.26	4.14	3.91	5.48	7.04	7.37	atac_wt_pe
chrI	2100043	2100194	3.23	1.59	0.74	1.23	1.43	1.78	1.70	1.24	1.99	2.33	2.03	atac_wt_pe
chrI	2118329	2118480	3.11	2.85	3.09	3.07	3.74	4.26	7.69	7.25	6.19	4.72	3.25	atac_wt_pe
chrI	2119381	2119532	1.83	3.05	2.90	5.42	6.46	5.78	16.84	8.98	9.91	10.30	8.38	atac_wt_pe
chrI	2120743	2120894	1.51	1.72	1.41	2.84	3.03	3.21	5.91	4.97	7.92	7.88	7.17	atac_wt_pe
chrI	2125222	2125373	2.81	4.68	5.65	8.09	8.99	9.30	20.12	16.94	13.17	11.85	10.26	atac_wt_pe
chrI	2126823	2126974	7.50	12.15	18.08	13.85	17.90	12.24	27.27	21.86	20.25	20.66	20.51	atac_wt_pe
chrI	2143633	2143784	1.85	1.47	1.26	1.80	1.69	1.86	2.20	1.99	3.01	3.35	2.29	atac_glp1_se
chrI	2147831	2147982	1.81	1.70	1.14	1.52	2.19	4.39	5.27	0.99	0.64	0.85	1.13	atac_wt_pe
chrI	2151768	2151919	12.94	4.54	3.22	2.86	2.65	2.91	1.65	1.56	1.64	1.60	1.93	atac_wt_pe
chrI	2154007	2154158	2.84	1.47	2.07	2.19	3.27	2.44	2.55	2.44	1.85	2.04	2.66	atac_wt_pe
chrI	2155581	2155732	106.78	55.71	60.94	75.82	62.98	38.87	52.78	48.27	51.93	50.06	48.54	atac_wt_pe
chrI	2155984	2156135	9.10	7.70	8.13	9.36	7.69	5.20	4.05	3.55	3.22	4.08	4.48	atac_wt_pe
chrI	2156240	2156391	1.27	1.40	1.46	4.09	8.09	9.88	0.49	0.82	0.71	0.84	0.93	atac_wt_pe
chrI	2156657	2156808	0.49	0.87	0.38	3.40	7.60	10.40	0.26	0.26	0.30	0.54	0.50	atac_wt_pe
chrI	2157137	2157288	3.76	3.52	3.10	3.89	5.66	5.39	11.76	9.42	10.02	10.64	10.16	atac_wt_pe
chrI	2167905	2168056	2.71	2.81	8.44	5.30	3.14	6.74	23.61	20.62	19.26	17.49	17.01	atac_wt_pe
chrI	2169913	2170064	1.72	1.88	2.76	2.87	1.70	2.87	6.06	5.95	4.99	3.93	3.16	atac_wt_pe
chrI	2170463	2170614	1.46	1.40	1.24	1.41	0.76	1.46	3.08	2.13	2.45	2.18	4.12	atac_glp1_se
chrI	2176886	2177037	8.20	2.66	2.90	2.09	2.48	1.63	1.63	1.86	2.40	1.63	1.65	atac_wt_pe
chrI	2178145	2178296	13.77	3.76	4.59	2.31	1.96	1.90	1.65	2.16	1.87	1.82	2.49	atac_wt_pe
chrI	2179962	2180113	12.92	2.86	5.35	6.86	8.27	2.55	4.21	3.27	3.30	3.35	3.75	atac_wt_pe
chrI	2182926	2183077	3.30	3.86	3.46	6.11	10.68	2.84	6.23	4.30	3.60	3.49	3.89	atac_wt_pe
chrI	2184917	2185068	4.75	6.76	3.64	5.96	7.92	3.12	3.70	3.73	5.45	5.58	6.01	atac_wt_pe
chrI	2186553	2186704	1.19	1.68	1.21	1.06	3.51	1.61	1.87	1.56	1.58	2.02	2.10	atac_wt_pe
chrI	2187265	2187416	1.31	1.11	0.56	0.92	1.84	1.11	0.91	0.80	0.83	1.15	1.60	atac_wt_se
chrI	2189464	2189615	3.60	2.35	2.18	2.72	3.64	3.68	11.76	5.36	4.96	5.98	5.72	atac_wt_pe
chrI	2190534	2190685	4.10	5.39	11.18	10.29	20.97	12.17	31.06	18.11	18.44	19.37	18.04	atac_wt_pe
chrI	2191352	2191503	3.04	4.10	3.48	2.93	3.56	2.46	6.66	4.69	5.34	6.82	7.47	atac_wt_pe
chrI	2192526	2192677	2.73	2.39	2.20	2.43	2.58	1.54	1.87	2.25	2.01	2.35	2.31	atac_wt_se
chrI	2210397	2210548	1.42	1.28	1.13	1.93	4.44	1.83	2.30	1.86	1.15	1.40	1.34	atac_wt_pe
chrI	2211703	2211854	1.13	1.48	2.40	5.94	9.16	2.87	4.44	3.87	3.96	2.87	2.40	atac_wt_pe
chrI	2212179	2212330	1.35	1.48	1.71	2.50	4.38	2.22	2.40	2.36	2.11	1.95	1.31	atac_wt_se
chrI	2219109	2219260	3.35	2.39	2.17	1.91	2.93	2.99	3.85	3.56	3.92	3.81	3.69	atac_glp1_se
chrI	2219608	2219759	2.56	1.73	2.23	1.61	1.77	1.96	2.06	1.61	2.18	2.03	1.35	atac_wt_se
chrI	2220779	2220930	3.49	2.14	2.37	1.75	1.87	1.49	1.25	1.20	0.95	1.04	1.30	atac_wt_se
chrI	2247717	2247868	1.50	2.43	2.71	4.14	4.04	5.56	16.16	11.12	11.46	13.14	10.67	atac_wt_pe
chrI	2249233	2249384	0.99	1.94	2.43	3.84	3.71	4.89	11.60	7.54	8.61	8.85	6.48	atac_wt_pe
chrI	2250775	2250926	0.64	1.16	1.14	1.04	1.08	1.12	1.61	1.69	2.33	2.66	2.33	atac_glp1_se
chrI	2253966	2254117	2.48	2.38	2.69	2.80	2.46	2.49	6.38	4.93	5.85	5.16	3.30	atac_glp1_se
chrI	2272376	2272527	0.92	1.42	1.11	2.50	2.08	4.62	1.50	1.06	1.25	1.07	1.12	atac_wt_pe
chrI	2273066	2273217	3.40	3.85	3.22	4.38	4.46	4.70	11.58	6.94	10.91	10.74	9.52	atac_wt_pe
chrI	2277048	2277199	6.15	7.48	6.55	7.18	5.09	4.06	7.25	6.59	6.12	10.19	9.95	atac_wt_pe
chrI	2280408	2280559	3.89	3.31	3.15	2.38	2.55	2.05	3.93	3.24	3.74	3.36	3.34	atac_wt_se
chrI	2291155	2291306	43.34	40.98	45.41	68.38	44.51	32.15	95.80	93.85	94.65	97.47	83.84	atac_wt_pe
chrI	2291504	2291655	4.59	6.35	7.36	11.71	11.06	9.55	17.82	16.27	19.64	18.61	13.23	atac_wt_pe
chrI	2292871	2293022	91.94	40.83	62.14	72.37	55.05	27.18	82.72	81.44	74.05	76.07	64.01	atac_wt_pe
chrI	2296033	2296184	1.66	1.71	1.57	1.63	1.85	2.45	1.92	2.28	2.68	2.22	2.31	atac_glp1_se
chrI	2299698	2299849	122.37	32.59	39.30	27.89	21.83	13.84	24.17	24.46	21.40	24.09	24.62	atac_wt_pe
chrI	2302824	2302975	2.76	2.49	1.86	2.44	2.94	4.08	0.92	1.46	1.31	1.19	1.53	atac_wt_pe
chrI	2304234	2304385	1.12	1.90	1.03	1.56	2.54	4.41	0.58	0.77	0.85	0.86	0.80	atac_wt_pe
chrI	2306051	2306202	5.03	2.41	2.45	2.34	2.83	3.58	0.90	1.29	0.77	1.06	1.01	atac_wt_se
chrI	2306843	2306994	13.18	7.92	6.51	9.91	14.56	15.32	12.43	10.73	9.49	12.03	11.23	atac_wt_pe
chrI	2307202	2307353	2.09	1.84	1.71	3.19	6.78	12.82	1.11	1.02	1.05	1.18	1.07	atac_wt_pe
chrI	2308623	2308774	0.74	1.51	1.13	1.34	1.95	3.34	0.71	0.42	0.90	0.78	0.86	atac_wt_se
chrI	2309309	2309460	1.89	1.28	0.68	2.86	5.11	7.59	1.73	1.25	1.24	1.27	1.12	atac_wt_pe
chrI	2311816	2311967	3.77	3.39	2.49	3.32	3.80	5.05	1.61	1.55	2.53	2.37	2.74	atac_wt_pe
chrI	2312235	2312386	7.75	5.27	4.04	8.04	8.83	7.75	12.28	12.64	23.82	21.65	28.11	atac_wt_pe
chrI	2313049	2313200	13.12	12.78	8.02	15.58	16.29	19.20	16.63	14.96	15.29	18.00	15.99	atac_wt_pe
chrI	2316036	2316187	1.82	2.03	1.90	8.81	17.87	30.99	0.51	0.79	0.95	1.01	0.97	atac_wt_pe
chrI	2318516	2318667	2.01	1.86	2.31	2.81	4.48	8.44	0.72	1.05	0.89	1.26	1.29	atac_wt_se
chrI	2318812	2318963	1.29	1.26	1.13	4.41	8.31	14.21	1.64	1.44	2.72	4.03	3.83	atac_wt_pe
chrI	2321888	2322039	9.00	10.04	6.40	13.89	15.83	17.09	15.68	12.02	12.89	14.20	13.45	atac_wt_pe
chrI	2322682	2322833	4.32	4.44	1.85	6.48	9.36	39.14	4.51	3.52	2.78	2.77	3.26	atac_wt_pe
chrI	2322933	2323084	1.45	1.27	0.72	2.16	2.79	13.72	0.84	0.62	0.71	0.52	0.80	atac_wt_pe
chrI	2333146	2333297	8.67	9.88	7.88	10.47	12.77	12.90	26.04	21.08	23.77	18.19	16.30	atac_wt_pe
chrI	2335476	2335627	2.21	3.41	3.23	2.15	3.56	2.42	0.93	0.91	0.89	0.80	1.21	atac_wt_pe
chrI	2339860	2340011	0.47	0.52	0.37	0.77	2.31	2.79	0.65	0.49	0.84	0.94	0.81	atac_wt_se
chrI	2342137	2342288	14.79	2.53	2.12	1.72	1.77	2.45	0.52	1.08	0.65	0.63	0.88	atac_wt_pe
chrI	2354931	2355082	5.27	2.99	2.60	2.70	1.36	1.53	2.40	1.17	1.21	1.20	2.28	atac_wt_pe
chrI	2385119	2385270	6.08	6.24	4.08	8.46	3.69	4.96	16.39	8.01	10.32	14.27	18.02	atac_wt_pe
chrI	2385959	2386110	0.83	1.20	1.01	1.23	0.76	1.25	0.97	1.27	1.88	2.12	3.15	atac_glp1_se
chrI	2390938	2391089	2.79	2.13	3.03	1.75	2.03	1.87	1.23	1.72	1.32	1.22	1.13	atac_wt_se
chrI	2393447	2393598	87.42	82.58	128.91	92.60	96.58	66.27	129.70	118.79	107.14	99.12	107.14	atac_wt_pe
chrI	2395055	2395206	1.54	1.58	1.50	1.07	1.61	1.42	3.27	2.99	2.32	2.45	3.11	atac_glp1_se
chrI	2401583	2401734	12.58	7.35	3.21	9.77	6.24	7.26	10.05	6.60	8.80	9.58	9.73	atac_wt_pe
chrI	2404739	2404890	3.23	2.27	2.19	2.57	2.69	4.32	1.95	1.45	1.66	2.10	1.84	atac_wt_se
chrI	2405034	2405185	0.94	1.05	0.69	1.08	1.61	3.02	0.57	0.70	0.59	0.60	0.72	atac_wt_se
chrI	2405522	2405673	0.15	0.60	0.18	0.53	1.01	2.34	0.26	0.17	0.33	0.28	0.47	atac_wt_se
chrI	2410072	2410223	9.87	6.14	5.12	18.67	18.22	22.52	25.94	13.06	17.54	18.89	20.13	atac_wt_pe
chrI	2411717	2411868	5.10	1.66	1.84	5.02	10.32	29.32	0.65	0.78	0.75	0.93	0.79	atac_wt_pe
chrI	2413090	2413241	1.59	2.77	2.91	2.32	2.00	2.11	0.73	1.02	0.98	1.24	0.98	atac_wt_se
chrI	2413570	2413721	1.89	3.17	3.11	2.20	1.91	2.23	1.23	1.67	1.26	1.46	1.82	atac_wt_se
chrI	2414160	2414311	2.97	3.54	3.06	1.91	1.73	1.55	1.30	1.57	1.16	2.12	2.14	atac_wt_pe
chrI	2420299	2420450	1.64	4.67	3.52	6.23	7.55	7.59	5.68	4.35	7.81	6.93	5.69	atac_wt_se
chrI	2420602	2420753	14.70	19.31	17.67	39.76	33.35	29.89	45.21	32.66	44.96	39.20	35.57	atac_wt_pe
chrI	2421001	2421152	3.17	4.42	3.71	6.59	5.77	6.14	4.40	5.01	3.74	3.57	3.27	atac_wt_se
chrI	2421223	2421374	2.05	3.06	2.24	3.68	4.27	4.46	3.31	2.98	3.40	3.38	2.96	atac_wt_se
chrI	2421775	2421926	8.56	9.80	7.96	16.04	14.81	15.10	19.49	15.48	17.43	18.48	20.27	atac_wt_pe
chrI	2427735	2427886	0.60	0.81	0.57	1.29	2.45	2.24	2.56	1.86	2.87	2.14	2.13	atac_wt_se
chrI	2428010	2428161	2.54	1.59	1.63	1.47	2.27	3.46	1.97	1.94	2.39	1.83	1.62	atac_wt_pe
chrI	2428670	2428821	2.16	1.94	2.41	2.81	2.00	4.21	6.92	4.09	3.51	2.53	2.31	atac_wt_pe
chrI	2432030	2432181	1.71	1.38	1.55	2.82	5.54	7.86	0.50	0.73	0.94	0.96	1.13	atac_wt_se
chrI	2432279	2432430	1.53	1.23	1.30	4.24	8.01	10.56	0.59	0.79	0.82	0.74	0.73	atac_wt_pe
chrI	2433683	2433834	11.66	10.55	6.38	15.72	11.61	12.08	20.10	16.08	14.98	19.29	18.04	atac_wt_pe
chrI	2434067	2434218	3.78	5.17	3.42	5.05	5.00	4.70	2.59	2.91	2.69	2.60	2.69	atac_wt_se
chrI	2436048	2436199	2.54	1.90	1.53	3.20	3.96	4.38	1.83	1.56	1.67	2.01	2.35	atac_wt_se
chrI	2436820	2436971	11.44	4.70	4.63	3.45	4.30	5.07	4.79	5.23	4.36	4.82	3.66	atac_wt_pe
chrI	2437030	2437181	16.27	14.50	11.47	11.54	16.41	10.40	19.67	13.01	11.77	12.41	10.20	atac_wt_pe
chrI	2437571	2437722	16.25	12.88	7.76	7.61	9.10	4.79	5.99	3.75	3.74	4.65	5.55	atac_wt_pe
chrI	2464683	2464834	13.81	3.63	3.57	3.65	3.57	2.15	2.07	1.65	1.11	1.22	1.69	atac_wt_pe
chrI	2470920	2471071	0.83	1.32	0.81	1.13	0.96	1.27	1.72	2.51	3.23	3.45	2.15	atac_glp1_se
chrI	2485218	2485369	1.23	2.36	1.44	2.63	3.99	2.69	1.40	1.35	1.76	2.34	2.04	atac_wt_se
chrI	2485573	2485724	10.51	8.98	5.03	15.62	11.37	13.40	13.18	9.30	12.00	14.12	15.07	atac_wt_pe
chrI	2487836	2487987	2.74	2.06	1.75	2.07	2.18	2.42	3.48	5.91	3.45	3.13	2.59	atac_wt_pe
chrI	2489847	2489998	0.62	1.06	0.70	1.40	2.16	4.22	0.39	0.32	0.32	0.49	0.86	atac_wt_se
chrI	2513775	2513926	4.20	1.60	1.36	1.88	1.49	3.29	2.75	1.33	1.74	1.73	1.85	atac_wt_se
chrI	2514247	2514398	25.91	12.89	18.83	59.91	56.86	76.78	73.02	27.97	44.83	48.13	47.92	atac_wt_pe
chrI	2516682	2516833	2.30	1.47	2.03	1.68	2.04	4.07	9.06	5.19	4.97	6.12	6.00	atac_wt_pe
chrI	2517800	2517951	1.38	1.68	1.39	1.10	1.61	1.91	2.23	1.71	1.58	1.16	2.02	atac_glp1_se
chrI	2519027	2519178	2.94	2.18	2.73	1.83	1.41	1.67	1.39	1.18	1.26	1.66	2.07	atac_wt_se
chrI	2552937	2553088	7.00	2.78	3.52	1.98	1.38	1.72	1.26	1.78	1.88	2.03	2.50	atac_wt_pe
chrI	2565291	2565442	3.23	1.76	1.96	1.26	1.01	1.49	0.64	0.71	0.55	0.61	0.69	atac_wt_se
chrI	2571143	2571294	1.29	3.74	2.26	2.91	2.15	2.09	1.81	1.67	0.90	1.65	2.14	atac_wt_pe
chrI	2571453	2571604	1.91	3.28	2.63	2.46	2.17	1.94	2.25	2.23	1.74	1.72	1.65	atac_wt_se
chrI	2574060	2574211	2.20	3.11	4.22	2.88	3.08	2.32	1.84	2.13	1.70	1.84	1.95	atac_wt_se
chrI	2577197	2577348	11.24	10.79	13.00	14.24	9.50	7.00	13.78	17.13	13.50	14.90	14.53	atac_wt_pe
chrI	2577429	2577580	9.00	9.41	12.45	10.58	9.20	6.97	11.45	13.50	9.04	11.19	11.60	atac_wt_se
chrI	2580167	2580318	8.44	14.64	20.73	13.28	11.34	8.16	12.09	15.27	13.70	16.76	20.28	atac_wt_pe
chrI	2584092	2584243	2.03	2.11	2.46	4.17	4.04	3.20	2.95	4.06	3.66	3.20	3.07	atac_wt_se
chrI	2585952	2586103	3.77	4.93	4.25	5.34	4.38	4.74	4.25	4.71	4.90	4.95	4.07	atac_wt_pe
chrI	2586260	2586411	29.36	33.45	32.93	44.78	31.69	31.06	59.65	49.26	58.95	59.97	52.59	atac_wt_pe
chrI	2586856	2587007	0.76	2.45	0.94	2.84	5.18	8.44	2.94	2.42	1.92	1.47	1.35	atac_wt_pe
chrI	2587105	2587256	0.93	2.25	1.61	2.91	2.56	4.24	2.63	2.83	2.20	1.77	2.09	atac_wt_pe
chrI	2587351	2587502	7.41	16.64	13.97	27.00	23.59	17.93	32.66	29.17	21.42	20.61	19.77	atac_wt_pe
chrI	2587650	2587801	10.62	27.88	31.19	50.43	47.07	44.12	94.65	74.96	83.88	72.97	47.63	atac_wt_pe
chrI	2589121	2589272	4.07	3.33	3.27	4.07	3.13	2.12	2.01	1.67	1.34	1.30	1.61	atac_wt_pe
chrI	2591554	2591705	8.69	10.52	13.70	10.89	9.11	8.06	11.42	13.23	10.04	8.56	8.36	atac_wt_pe
chrI	2594346	2594497	2.40	2.91	3.04	3.46	2.60	2.53	2.79	2.54	2.82	2.19	1.95	atac_wt_se
chrI	2595465	2595616	1.65	2.55	3.97	3.04	4.14	2.08	3.34	7.63	7.80	4.59	3.50	atac_wt_pe
chrI	2596502	2596653	0.82	1.90	1.73	1.38	1.12	1.64	2.15	2.14	3.09	2.32	2.95	atac_glp1_se
chrI	2597483	2597634	1.33	2.12	2.15	1.65	1.69	2.12	4.46	7.35	7.84	6.16	5.53	atac_glp1_se
chrI	2598526	2598677	7.19	12.48	17.11	16.94	13.89	9.85	22.46	20.83	19.32	16.17	12.27	atac_wt_pe
chrI	2598841	2598992	2.22	4.05	4.71	3.94	3.51	3.01	5.36	6.61	7.15	6.75	5.79	atac_glp1_se
chrI	2601713	2601864	3.31	2.32	1.89	1.76	1.18	1.33	0.84	1.11	0.80	0.91	1.19	atac_wt_se
chrI	2603724	2603875	104.74	72.54	83.79	90.35	53.58	35.74	75.40	63.64	65.87	76.08	83.81	atac_wt_pe
chrI	2605395	2605546	22.12	25.59	46.66	25.13	26.25	13.94	30.01	31.23	25.72	29.72	35.30	atac_wt_pe
chrI	2608599	2608750	3.98	2.84	3.31	1.58	1.68	1.40	1.05	1.35	1.14	1.59	1.55	atac_wt_pe
chrI	2620403	2620554	3.46	3.10	1.80	4.57	5.65	6.85	3.18	2.90	3.47	4.02	4.30	atac_wt_pe
chrI	2622948	2623099	2.63	2.16	1.85	3.11	3.19	4.85	3.14	3.44	2.41	2.07	1.48	atac_glp1_se
chrI	2628239	2628390	36.22	17.56	23.50	27.33	27.24	19.32	30.34	27.82	27.00	27.80	23.80	atac_wt_pe
chrI	2628633	2628784	3.24	3.35	4.34	8.36	11.22	11.68	12.89	12.55	11.60	8.36	7.57	atac_wt_pe
chrI	2628796	2628947	6.07	5.51	6.27	8.16	8.26	9.20	13.24	9.76	9.02	9.72	10.13	atac_wt_pe
chrI	2629175	2629326	2.67	2.75	1.81	3.37	3.87	3.93	2.88	2.29	2.20	1.96	2.62	atac_wt_pe
chrI	2629367	2629518	0.79	2.31	0.77	2.28	2.64	2.89	1.90	1.26	2.41	2.40	2.64	atac_glp1_se
chrI	2632611	2632762	1.79	1.85	1.44	2.21	2.54	2.80	4.31	4.61	4.12	3.49	4.02	atac_glp1_se
chrI	2634635	2634786	3.13	2.36	3.21	3.68	7.61	5.46	10.27	10.32	8.94	9.97	9.16	atac_wt_pe
chrI	2634931	2635082	2.11	2.36	1.61	1.97	2.93	2.77	2.71	1.74	1.53	2.29	1.96	atac_wt_se
chrI	2636133	2636284	1.59	1.08	1.39	3.15	3.44	5.18	4.47	3.12	5.43	4.76	4.89	atac_wt_pe
chrI	2636415	2636566	1.87	2.07	1.97	3.64	3.32	4.84	1.42	1.54	1.29	1.66	1.61	atac_wt_pe
chrI	2639743	2639894	19.34	16.74	9.77	23.51	13.46	15.88	29.89	20.22	22.08	27.14	28.87	atac_wt_pe
chrI	2642414	2642565	2.10	2.45	1.10	2.18	3.29	4.19	3.91	3.36	3.74	4.27	4.31	atac_wt_pe
chrI	2648390	2648541	1.86	1.59	1.30	1.26	1.25	1.28	1.74	0.89	2.56	2.06	2.94	atac_glp1_se
chrI	2648918	2649069	4.03	3.25	3.47	2.46	2.63	2.30	1.98	2.57	2.50	2.73	2.75	atac_wt_pe
chrI	2653302	2653453	0.99	1.33	0.81	1.06	0.83	1.01	1.18	2.02	3.07	2.72	3.84	atac_glp1_se
chrI	2654532	2654683	4.83	6.97	5.28	11.15	11.24	8.70	14.19	24.59	20.26	20.00	23.54	atac_wt_pe
chrI	2655801	2655952	2.57	4.08	4.16	4.07	4.47	6.48	10.70	17.48	22.48	22.63	21.57	atac_wt_pe
chrI	2655998	2656149	1.71	2.91	4.48	3.19	3.78	4.36	8.81	15.45	16.55	18.11	19.21	atac_wt_pe
chrI	2657121	2657272	3.00	6.93	12.10	13.62	10.90	11.14	20.35	23.24	26.07	21.13	21.70	atac_wt_pe
chrI	2658650	2658801	2.18	4.22	5.10	4.66	4.96	3.42	4.35	6.83	7.71	8.33	12.06	atac_wt_pe
chrI	2659322	2659473	1.88	2.41	3.30	2.92	2.48	2.11	2.56	2.90	3.33	3.29	4.14	atac_wt_se
chrI	2659632	2659783	2.70	3.23	3.68	3.99	3.52	3.41	7.56	9.18	7.93	8.57	9.38	atac_glp1_se
chrI	2659898	2660049	3.67	3.40	3.98	5.44	4.87	5.23	15.15	14.42	14.67	12.68	11.00	atac_wt_pe
chrI	2660030	2660181	4.80	5.01	4.26	5.92	5.72	5.83	15.57	15.75	16.69	14.26	11.08	atac_wt_pe
chrI	2661319	2661470	1.43	1.83	1.57	2.54	2.03	2.50	4.11	3.76	2.97	4.05	4.04	atac_wt_se
chrI	2662590	2662741	1.76	3.67	3.83	4.61	3.44	3.45	7.00	9.88	9.21	8.29	7.68	atac_wt_pe
chrI	2663267	2663418	1.20	2.50	1.92	2.99	2.18	2.18	5.42	5.55	5.59	6.29	5.10	atac_glp1_se
chrI	2663692	2663843	1.44	2.94	2.87	3.35	2.59	2.76	5.87	5.67	5.49	5.43	5.10	atac_glp1_se
chrI	2664172	2664323	1.82	2.87	2.87	2.34	2.42	3.54	11.50	12.93	12.65	10.45	10.60	atac_glp1_se
chrI	2664977	2665128	4.54	5.77	5.55	6.43	3.78	3.03	5.04	5.98	5.42	6.08	6.81	atac_wt_pe
chrI	2665323	2665474	4.76	3.72	4.10	5.21	3.88	3.05	5.05	8.01	8.35	7.56	6.45	atac_wt_pe
chrI	2665892	2666043	3.24	5.16	5.97	14.64	7.40	5.37	18.12	13.30	12.92	10.33	9.45	atac_wt_pe
chrI	2666718	2666869	1.72	2.85	2.87	4.83	6.50	4.54	6.40	6.47	7.00	4.43	3.72	atac_wt_pe
chrI	2667914	2668065	9.13	35.17	43.68	50.72	52.26	43.71	94.01	95.52	99.61	86.98	70.65	atac_wt_pe
chrI	2668264	2668415	2.05	4.68	6.86	9.60	10.73	10.20	16.21	15.73	15.07	12.20	7.06	atac_wt_pe
chrI	2668692	2668843	2.89	11.88	12.90	18.71	11.42	7.20	16.49	20.33	22.09	19.74	19.64	atac_wt_pe
chrI	2669305	2669456	2.61	3.16	3.90	4.17	3.96	3.36	4.25	5.60	4.63	4.58	3.47	atac_wt_se
chrI	2669742	2669893	1.45	2.15	1.89	1.66	1.92	2.10	3.82	3.86	4.11	3.72	3.81	atac_glp1_se
chrI	2670568	2670719	1.76	3.03	3.74	3.87	4.20	8.55	15.39	11.21	12.36	12.16	8.73	atac_wt_pe
chrI	2672067	2672218	2.33	1.91	2.19	2.32	2.59	3.52	8.39	7.28	9.74	8.77	8.11	atac_glp1_se
chrI	2673038	2673189	1.76	2.34	2.14	2.78	2.94	2.77	5.81	7.22	10.59	9.54	10.22	atac_glp1_se
chrI	2678152	2678303	5.55	6.88	11.16	7.76	7.88	6.08	4.77	4.04	3.32	3.82	5.20	atac_wt_pe
chrI	2679544	2679695	11.39	14.56	23.14	15.91	11.50	7.93	9.66	9.84	7.98	9.05	9.92	atac_wt_pe
chrI	2680782	2680933	2.93	2.64	3.46	3.01	3.18	2.09	1.76	1.39	1.21	1.54	1.99	atac_wt_pe
chrI	2681502	2681653	6.71	12.80	13.53	14.19	7.46	6.10	9.55	8.29	6.36	9.24	10.16	atac_wt_pe
chrI	2682533	2682684	4.68	4.25	5.69	4.93	3.95	3.07	1.86	2.08	1.69	2.06	1.92	atac_wt_se
chrI	2682978	2683129	19.59	29.21	57.80	21.96	18.47	9.63	15.71	16.73	14.11	20.51	24.41	atac_wt_pe
chrI	2684496	2684647	2.67	2.51	3.23	2.89	2.77	2.48	1.78	2.47	1.79	1.88	2.23	atac_wt_se
chrI	2684843	2684994	2.30	3.20	3.04	3.01	2.93	2.47	2.57	3.88	3.03	3.51	4.20	atac_glp1_se
chrI	2686459	2686610	1.62	1.51	1.34	2.49	4.24	2.28	7.94	6.03	4.97	3.64	3.27	atac_wt_pe
chrI	2686861	2687012	3.36	2.32	2.82	2.85	5.20	2.92	5.24	5.29	3.56	2.56	2.75	atac_wt_se
chrI	2687299	2687450	2.38	2.36	2.68	4.31	4.36	4.64	4.88	3.79	2.40	2.34	2.25	atac_wt_se
chrI	2687696	2687847	3.85	5.43	3.96	6.48	6.59	13.63	17.44	15.23	12.36	11.20	7.69	atac_wt_pe
chrI	2688108	2688259	2.62	3.67	1.78	3.50	3.64	4.11	5.67	4.97	4.38	4.48	3.51	atac_wt_pe
chrI	2688869	2689020	65.82	50.49	66.88	96.58	93.17	114.38	39.99	32.19	41.57	41.80	44.34	atac_wt_pe
chrI	2689408	2689559	4.05	10.75	8.71	18.66	21.19	18.44	38.54	34.00	37.92	33.98	29.60	atac_wt_pe
chrI	2690171	2690322	2.59	3.61	2.75	7.32	8.37	7.63	8.79	7.53	6.23	6.63	5.69	atac_wt_pe
chrI	2690432	2690583	1.44	2.83	2.03	4.85	7.83	5.64	12.12	11.27	14.23	12.57	11.08	atac_wt_pe
chrI	2697139	2697290	5.73	2.46	2.56	1.84	1.32	1.58	0.77	0.86	0.68	1.07	1.35	atac_wt_pe
chrI	2703291	2703442	25.03	19.48	37.57	21.85	27.21	10.32	13.14	12.03	9.07	10.54	10.78	atac_wt_pe
chrI	2704476	2704627	2.67	2.95	3.49	3.58	5.72	4.51	9.91	9.29	9.83	10.16	10.14	atac_wt_pe
chrI	2705762	2705913	4.71	2.77	4.29	3.28	3.88	2.41	2.80	2.51	2.72	2.42	2.56	atac_wt_pe
chrI	2706138	2706289	12.41	5.15	10.78	10.21	14.42	8.23	12.33	14.80	14.76	12.94	12.81	atac_wt_pe
chrI	2707211	2707362	23.63	14.64	12.10	13.72	12.72	6.35	13.73	14.46	12.77	15.12	13.87	atac_wt_pe
chrI	2708326	2708477	14.53	7.24	7.52	7.30	6.97	3.57	4.33	3.16	3.17	3.16	4.05	atac_wt_pe
chrI	2709607	2709758	6.56	2.55	4.41	2.72	2.90	2.31	4.94	3.08	3.27	3.27	2.90	atac_wt_pe
chrI	2710926	2711077	22.52	3.44	2.60	2.91	2.63	2.35	1.53	1.85	1.49	1.57	1.77	atac_wt_pe
chrI	2711280	2711431	6.92	2.40	2.49	1.80	1.82	1.63	0.91	1.28	0.97	1.52	1.72	atac_wt_se
chrI	2722881	2723032	0.50	1.12	0.50	1.44	2.22	3.66	0.46	0.44	0.51	0.38	0.48	atac_wt_se
chrI	2723200	2723351	0.76	1.34	0.74	1.57	3.25	5.10	0.37	0.57	0.35	0.54	0.50	atac_wt_pe
chrI	2723534	2723685	1.00	1.34	0.90	1.96	2.92	4.42	0.39	0.43	0.58	0.45	0.43	atac_wt_pe
chrI	2726291	2726442	3.47	3.63	2.32	3.26	3.75	5.48	1.98	1.48	1.47	1.95	1.61	atac_wt_se
chrI	2726656	2726807	16.14	16.32	8.05	18.49	14.73	16.32	15.61	12.45	11.72	13.76	13.39	atac_wt_pe
chrI	2727063	2727214	2.01	4.28	2.51	3.40	4.30	4.63	1.65	1.91	1.88	2.58	1.96	atac_wt_se
chrI	2727643	2727794	20.78	26.91	31.78	21.25	25.56	15.84	27.65	18.36	15.77	20.65	25.84	atac_wt_pe
chrI	2728779	2728930	10.18	8.14	12.64	14.95	14.79	16.50	31.91	25.26	23.10	20.11	21.63	atac_wt_pe
chrI	2738315	2738466	10.74	1.71	2.23	1.49	1.40	1.54	0.69	0.85	0.77	1.00	0.65	atac_wt_pe
chrI	2739474	2739625	11.50	2.19	2.78	2.06	1.31	1.49	0.72	0.96	0.92	0.96	0.94	atac_wt_pe
chrI	2740063	2740214	17.59	2.12	2.17	1.88	2.20	1.57	0.77	1.00	0.88	1.24	0.98	atac_wt_pe
chrI	2740945	2741096	7.91	1.90	2.68	1.64	1.58	1.24	1.03	1.36	0.97	1.21	1.43	atac_wt_se
chrI	2741210	2741361	7.96	2.15	2.46	1.60	1.36	1.45	0.93	1.24	0.84	0.86	1.01	atac_wt_se
chrI	2742314	2742465	3.02	2.22	1.81	1.49	1.43	1.18	0.93	1.59	1.07	1.06	1.19	atac_wt_pe
chrI	2742966	2743117	7.63	2.41	2.21	1.76	1.24	1.50	0.88	1.07	0.95	0.85	0.73	atac_wt_pe
chrI	2744956	2745107	5.92	2.58	3.15	2.42	2.03	1.36	0.88	1.31	0.97	1.07	1.46	atac_wt_pe
chrI	2745975	2746126	7.25	2.11	3.24	2.11	1.64	1.34	1.43	1.78	1.52	1.49	1.28	atac_wt_se
chrI	2746631	2746782	2.60	1.69	1.80	1.48	3.80	1.83	1.47	1.52	1.38	1.45	1.38	atac_wt_pe
chrI	2746828	2746979	3.06	1.83	1.52	1.57	2.38	1.75	1.22	1.13	0.83	1.20	1.12	atac_wt_pe
chrI	2747652	2747803	8.99	2.62	4.55	4.04	4.89	3.40	3.85	3.86	4.12	4.50	3.57	atac_wt_pe
chrI	2747795	2747946	8.77	2.77	4.59	4.24	5.98	4.43	4.98	5.71	6.64	6.19	6.17	atac_wt_pe
chrI	2749182	2749333	4.44	1.49	2.00	1.33	1.26	1.50	1.10	1.03	0.80	0.84	0.91	atac_wt_pe
chrI	2749464	2749615	5.34	1.62	1.39	1.22	1.27	1.70	0.66	0.64	0.79	0.76	1.16	atac_wt_pe
chrI	2750849	2751000	9.50	2.85	2.09	1.85	1.97	1.91	2.17	2.13	2.42	2.60	3.58	atac_wt_pe
chrI	2751117	2751268	10.87	3.00	2.89	2.80	2.94	1.87	1.75	1.71	2.40	3.15	4.67	atac_wt_pe
chrI	2752179	2752330	2.66	2.20	1.62	1.29	1.34	1.41	0.67	0.64	0.78	0.77	0.96	atac_wt_se
chrI	2753044	2753195	47.49	9.85	7.61	11.78	10.75	9.27	18.71	16.58	17.22	16.15	12.43	atac_wt_pe
chrI	2754167	2754318	5.70	1.79	1.49	1.44	1.43	1.79	0.57	1.03	0.69	0.79	0.80	atac_wt_pe
chrI	2755207	2755358	2.27	2.35	2.00	2.14	2.18	3.69	0.87	0.82	0.77	0.82	1.28	atac_wt_pe
chrI	2755506	2755657	3.56	1.45	1.67	1.76	1.63	2.23	0.47	0.81	0.83	0.59	0.60	atac_wt_se
chrI	2758266	2758417	2.30	1.88	1.69	2.89	3.60	3.07	3.49	3.06	2.46	1.74	1.66	atac_wt_se
chrI	2758665	2758816	1.09	0.96	0.68	1.85	4.53	6.57	0.65	0.77	0.55	0.64	0.47	atac_wt_pe
chrI	2761001	2761152	5.59	4.78	3.63	16.27	13.71	9.79	31.05	23.78	26.76	18.67	11.56	atac_wt_pe
chrI	2762188	2762339	4.52	2.45	2.38	2.43	2.55	2.18	1.58	1.66	1.48	1.54	1.52	atac_wt_pe
chrI	2773894	2774045	2.88	6.03	5.48	6.38	6.53	8.42	22.84	15.70	18.15	17.51	17.99	atac_wt_pe
chrI	2774998	2775149	2.24	2.32	2.33	2.89	2.92	2.84	2.68	3.02	2.49	2.75	2.90	atac_wt_se
chrI	2776204	2776355	14.02	15.60	8.48	19.69	14.54	14.46	19.20	14.23	17.07	19.72	19.78	atac_wt_pe
chrI	2777470	2777621	2.68	4.08	2.76	3.47	3.61	3.88	7.59	6.17	8.21	7.70	10.10	atac_wt_pe
chrI	2778151	2778302	1.89	2.14	2.02	4.53	6.48	19.41	1.50	2.16	1.28	1.45	1.72	atac_wt_pe
chrI	2778412	2778563	2.82	4.46	3.18	6.42	9.28	22.72	16.65	29.60	20.26	10.96	10.25	atac_wt_pe
chrI	2778782	2778933	1.43	2.83	2.66	2.41	3.28	5.13	11.49	12.25	14.15	10.89	11.12	atac_wt_pe
chrI	2780095	2780246	1.50	1.66	3.00	2.85	1.26	1.59	1.92	1.46	0.91	0.90	1.10	atac_wt_pe
chrI	2785983	2786134	1.68	1.20	1.03	0.91	5.24	1.41	0.71	0.38	0.36	0.37	0.39	atac_wt_pe
chrI	2791501	2791652	2.28	2.50	3.16	8.28	4.52	5.74	18.58	13.20	12.99	10.41	6.58	atac_wt_pe
chrI	2800856	2801007	4.95	9.52	18.83	19.46	33.48	19.76	60.56	43.87	52.11	48.04	34.72	atac_wt_pe
chrI	2801867	2802018	1.20	2.38	2.83	2.43	3.08	2.57	5.01	2.50	3.35	2.95	3.16	atac_wt_pe
chrI	2803632	2803783	2.53	2.27	2.20	2.34	3.16	3.00	3.34	2.55	3.85	3.50	2.65	atac_wt_pe
chrI	2818602	2818753	2.38	1.71	1.79	3.84	4.31	1.32	1.80	2.34	0.91	0.75	0.77	atac_wt_pe
chrI	2825829	2825980	2.70	2.79	2.33	1.53	1.76	1.71	1.31	1.41	1.63	1.62	1.52	atac_wt_pe
chrI	2826981	2827132	17.37	2.28	2.46	1.86	2.16	2.50	1.57	1.76	1.68	1.23	1.46	atac_wt_pe
chrI	2827494	2827645	2.12	1.42	0.55	0.90	0.52	0.75	1.15	1.32	1.57	1.75	2.24	atac_wt_se
chrI	2829186	2829337	26.98	2.29	2.10	2.15	2.07	2.31	1.15	1.25	1.01	1.35	1.14	atac_wt_pe
chrI	2830355	2830506	4.51	5.69	4.14	5.94	5.27	6.49	3.40	3.72	3.17	4.30	4.40	atac_wt_pe
chrI	2830805	2830956	0.74	1.20	0.50	2.60	6.37	8.79	0.38	0.47	0.46	0.66	0.50	atac_wt_se
chrI	2831508	2831659	108.48	27.50	29.94	27.33	19.30	28.73	44.46	39.93	30.83	28.28	22.09	atac_wt_pe
chrI	2831839	2831990	12.92	7.98	10.39	9.59	14.20	19.88	47.22	37.33	35.64	31.88	24.84	atac_wt_pe
chrI	2833318	2833469	6.46	4.32	3.62	3.78	2.39	2.38	2.48	1.65	1.33	1.43	1.60	atac_wt_se
chrI	2834251	2834402	8.45	2.74	2.50	2.01	1.96	1.67	0.98	1.41	1.57	0.97	1.60	atac_wt_pe
chrI	2835356	2835507	8.75	4.78	7.22	8.49	10.94	7.87	13.91	10.48	12.56	11.32	9.42	atac_wt_pe
chrI	2835759	2835910	11.53	4.87	6.91	5.81	6.31	4.02	3.70	2.71	2.07	2.94	3.05	atac_wt_pe
chrI	2836926	2837077	6.66	2.36	2.35	1.70	1.79	2.30	1.97	1.31	1.97	1.65	1.74	atac_wt_pe
chrI	2837867	2838018	8.24	2.75	2.65	1.82	1.75	1.78	1.31	1.14	0.98	1.08	1.13	atac_wt_pe
chrI	2838436	2838587	5.06	2.19	1.89	1.68	1.61	1.46	1.13	1.29	1.52	1.45	1.69	atac_wt_se
chrI	2839724	2839875	7.83	5.20	4.70	3.93	2.96	1.87	2.90	2.96	2.16	2.11	1.98	atac_wt_pe
chrI	2841022	2841173	11.93	2.76	2.67	2.18	2.41	1.80	1.33	1.64	1.23	1.32	2.14	atac_wt_pe
chrI	2842176	2842327	3.61	2.14	1.52	1.25	0.99	1.00	0.62	0.67	0.82	0.54	0.68	atac_wt_se
chrI	2844236	2844387	32.49	3.79	2.75	1.96	1.58	1.89	1.09	1.14	1.08	1.06	1.06	atac_wt_pe
chrI	2844483	2844634	11.95	4.58	3.61	3.01	1.69	2.18	2.85	2.78	2.12	1.99	2.48	atac_wt_pe
chrI	2845625	2845776	8.78	2.37	2.00	1.57	1.34	1.25	0.84	1.15	0.81	0.96	1.17	atac_wt_pe
chrI	2848485	2848636	1.94	2.13	2.40	2.56	3.37	2.45	4.49	3.60	4.01	4.54	2.58	atac_wt_pe
chrI	2850850	2851001	9.46	8.06	10.40	12.78	15.37	7.13	5.31	4.19	4.02	4.14	4.69	atac_wt_pe
chrI	2853811	2853962	1.72	2.84	3.31	2.45	2.86	2.17	2.78	2.24	2.10	1.97	1.84	atac_wt_pe
chrI	2855020	2855171	1.19	2.18	1.55	1.55	2.23	1.57	1.38	1.75	1.17	1.18	1.00	atac_wt_se
chrI	2856446	2856597	0.81	1.51	1.83	1.47	2.75	2.56	3.02	3.42	2.88	2.96	2.40	atac_glp1_se
chrI	2857703	2857854	3.20	6.68	7.30	10.39	12.48	12.14	26.45	23.30	17.20	13.91	11.26	atac_wt_pe
chrI	2859858	2860009	3.17	4.60	4.30	3.17	2.60	2.99	3.06	4.57	5.23	4.88	5.25	atac_wt_pe
chrI	2861128	2861279	7.92	13.07	13.80	15.22	10.15	7.29	14.87	15.03	12.92	14.92	16.33	atac_wt_pe
chrI	2861651	2861802	0.58	1.23	0.54	2.42	4.39	6.86	1.24	1.37	1.37	1.57	1.70	atac_wt_pe
chrI	2861885	2862036	0.56	1.28	0.80	1.06	1.85	3.12	5.72	7.83	10.63	9.42	8.06	atac_glp1_se
chrI	2864082	2864233	72.61	68.79	82.94	128.60	73.86	56.09	146.73	122.33	152.15	147.39	132.95	atac_wt_pe
chrI	2866288	2866439	0.87	0.99	0.88	1.42	1.28	1.97	6.26	4.23	5.40	3.83	3.57	atac_glp1_se
chrI	2869937	2870088	5.02	7.35	7.66	6.72	10.32	8.31	27.00	28.60	25.73	24.48	25.01	atac_wt_pe
chrI	2875199	2875350	1.79	2.42	2.70	4.22	6.35	11.38	1.98	1.85	2.10	2.15	2.04	atac_wt_pe
chrI	2875482	2875633	3.19	4.10	4.09	4.75	7.45	11.20	2.79	3.04	3.26	3.16	2.73	atac_wt_pe
chrI	2876077	2876228	5.12	6.43	5.53	7.39	10.39	12.53	3.56	4.21	5.42	5.01	4.88	atac_wt_se
chrI	2876503	2876654	65.06	50.86	81.15	79.23	102.72	86.98	91.33	80.99	82.40	92.16	79.05	atac_wt_pe
chrI	2876648	2876799	54.49	39.04	64.97	62.38	79.53	66.08	85.56	80.60	77.28	75.35	68.44	atac_wt_pe
chrI	2878650	2878801	1.94	2.73	2.16	2.98	3.68	4.60	3.93	3.06	2.74	2.50	2.46	atac_wt_se
chrI	2887301	2887452	21.46	6.16	4.34	6.40	4.89	4.10	7.22	6.16	5.58	4.76	5.78	atac_wt_pe
chrI	2887714	2887865	10.12	2.41	2.28	2.36	1.73	2.34	1.22	1.36	1.23	1.40	1.61	atac_wt_pe
chrI	2888792	2888943	15.82	2.65	2.74	2.31	1.89	3.61	1.42	1.46	1.43	1.42	1.34	atac_wt_pe
chrI	2889520	2889671	3.59	3.46	1.47	1.87	1.45	2.29	2.08	1.79	1.25	1.72	1.79	atac_wt_pe
chrI	2890357	2890508	3.80	1.42	0.57	0.72	1.20	2.28	1.07	0.84	1.20	1.12	1.09	atac_wt_pe
chrI	2890690	2890841	14.89	2.80	2.21	2.22	2.16	5.49	1.30	2.06	1.80	1.59	1.51	atac_wt_pe
chrI	2895108	2895259	2.95	3.13	1.92	2.99	3.87	5.47	4.60	3.62	3.59	4.18	4.87	atac_wt_pe
chrI	2901021	2901172	15.32	11.04	7.25	14.55	10.80	11.32	16.67	13.55	14.95	15.65	17.39	atac_wt_pe
chrI	2904170	2904321	5.01	3.37	1.96	2.21	2.21	3.04	3.01	2.01	2.71	2.95	2.70	atac_wt_pe
chrI	2905738	2905889	1.02	1.08	0.67	2.82	4.98	12.06	0.41	0.76	0.60	0.40	0.75	atac_wt_pe
chrI	2924781	2924932	0.24	0.42	0.23	0.59	0.85	1.67	0.62	0.87	0.98	0.73	0.85	atac_wt_se
chrI	2925100	2925251	3.61	4.13	2.46	3.85	4.04	5.15	5.72	4.99	4.03	6.23	6.67	atac_wt_pe
chrI	2928125	2928276	29.66	34.81	29.20	52.66	40.51	36.08	63.67	56.39	58.62	58.77	52.19	atac_wt_pe
chrI	2929661	2929812	8.15	7.48	4.36	11.87	11.71	12.51	12.91	8.84	10.10	11.72	11.55	atac_wt_pe
chrI	2935661	2935812	34.19	24.47	27.98	52.81	33.42	40.45	49.76	16.58	26.43	31.33	38.50	atac_wt_pe
chrI	2944686	2944837	3.16	1.79	1.82	2.35	2.74	5.04	1.88	1.26	1.16	1.13	1.54	atac_wt_pe
chrI	2944866	2945017	1.94	2.35	0.44	2.59	2.59	5.20	3.23	0.79	0.96	1.01	1.15	atac_wt_pe
chrI	2945479	2945630	3.60	2.26	2.24	3.64	4.10	3.25	3.58	1.85	2.28	1.83	1.62	atac_wt_se
chrI	2945811	2945962	4.40	1.96	1.62	3.74	3.87	2.18	2.48	1.57	1.40	1.63	1.22	atac_wt_pe
chrI	2959264	2959415	1.11	1.60	1.64	1.83	3.20	2.86	6.90	8.03	13.25	12.52	11.99	atac_wt_pe
chrI	2960618	2960769	15.33	7.82	10.14	9.61	9.96	8.63	15.45	11.29	14.92	15.06	11.04	atac_wt_pe
chrI	2962106	2962257	4.74	4.26	5.70	5.98	4.79	4.19	10.25	6.54	5.80	6.37	6.54	atac_wt_pe
chrI	2962421	2962572	1.71	2.17	3.27	5.04	5.51	5.52	13.88	7.88	7.75	7.59	6.90	atac_wt_pe
chrI	2964485	2964636	7.79	1.66	1.43	1.17	2.31	1.81	1.65	1.47	1.65	2.69	2.64	atac_wt_pe
chrI	2965537	2965688	6.97	1.97	1.83	1.15	1.31	1.37	0.87	1.05	0.78	0.87	0.81	atac_wt_pe
chrI	2966471	2966622	18.37	3.08	3.39	2.69	2.05	1.91	1.26	1.08	0.96	0.98	1.55	atac_wt_pe
chrI	2967169	2967320	4.32	2.70	2.65	1.98	2.23	1.89	0.80	1.41	1.09	1.18	1.00	atac_wt_se
chrI	2967716	2967867	20.96	8.68	9.21	15.13	14.39	6.81	15.65	15.53	13.39	10.00	8.58	atac_wt_pe
chrI	2969656	2969807	7.45	2.18	2.45	2.50	6.73	2.50	1.63	1.60	0.87	1.04	1.26	atac_wt_pe
chrI	2970732	2970883	10.72	3.91	3.37	3.69	5.21	3.00	1.94	2.16	1.59	1.55	1.82	atac_wt_pe
chrI	2971082	2971233	5.18	2.03	2.14	1.97	3.14	1.77	1.09	1.24	0.87	0.96	1.16	atac_wt_pe
chrI	2974816	2974967	4.80	1.89	2.44	2.44	1.92	1.40	0.98	0.93	0.97	1.12	1.36	atac_wt_pe
chrI	2976344	2976495	5.49	2.88	2.79	2.61	2.68	1.89	1.55	1.67	1.71	1.54	1.79	atac_wt_pe
chrI	2978608	2978759	5.21	2.06	2.31	1.70	2.11	1.75	1.03	1.41	1.24	1.26	1.36	atac_wt_pe
chrI	2979653	2979804	1.89	1.38	0.87	1.30	1.17	1.28	0.50	0.61	0.77	0.76	0.75	atac_wt_pe
chrI	2984459	2984610	0.41	1.16	0.84	1.08	1.23	1.16	1.15	2.07	4.66	3.95	2.87	atac_glp1_se
chrI	2985180	2985331	15.31	6.06	6.38	7.26	6.37	4.91	8.06	6.09	6.41	7.75	10.35	atac_wt_pe
chrI	2995979	2996130	3.47	8.79	3.53	6.68	4.75	11.94	6.32	6.36	3.93	5.34	6.13	atac_wt_pe
chrI	2996294	2996445	12.63	14.03	9.67	18.72	12.32	14.97	16.47	10.54	9.83	13.22	13.73	atac_wt_pe
chrI	2996729	2996880	2.61	3.23	2.31	3.02	3.40	4.08	2.23	2.41	2.91	2.41	1.94	atac_glp1_se
chrI	3004037	3004188	5.79	5.32	5.65	3.84	2.76	3.14	5.39	4.69	3.69	6.00	5.78	atac_wt_pe
chrI	3010416	3010567	19.32	7.44	11.51	25.25	29.21	7.11	13.02	8.60	9.24	9.43	11.60	atac_wt_pe
chrI	3011799	3011950	2.57	2.74	2.72	4.92	6.80	1.94	1.77	1.57	1.64	1.43	1.40	atac_wt_se
chrI	3014749	3014900	3.17	5.19	4.73	5.81	4.51	3.45	5.16	4.27	3.66	5.23	6.06	atac_wt_pe
chrI	3015399	3015550	8.56	7.62	3.60	8.58	6.95	7.35	9.68	5.84	9.08	8.89	9.76	atac_wt_pe
chrI	3015708	3015859	1.37	1.67	0.94	2.02	1.53	2.32	2.83	2.57	2.93	3.20	3.57	atac_glp1_se
chrI	3019830	3019981	1.30	5.38	5.36	4.05	5.71	13.94	32.18	26.32	35.35	34.27	34.88	atac_wt_pe
chrI	3023227	3023378	1.88	1.50	1.48	1.16	1.00	1.16	1.01	2.04	1.73	1.72	1.77	atac_glp1_se
chrI	3032846	3032997	13.44	10.43	6.50	15.39	9.29	8.48	16.34	14.13	13.45	14.29	14.65	atac_wt_pe
chrI	3035124	3035275	1.75	1.60	1.36	1.45	1.94	2.54	1.69	2.85	3.59	3.85	2.93	atac_glp1_se
chrI	3035947	3036098	1.40	2.62	1.53	2.25	2.49	3.00	8.07	6.88	6.99	6.57	7.24	atac_wt_pe
chrI	3038055	3038206	0.84	0.94	0.61	1.44	1.73	2.34	0.76	0.92	0.91	0.82	0.69	atac_wt_pe
chrI	3049445	3049596	1.40	1.86	2.43	4.66	3.93	2.60	4.01	5.03	8.25	8.52	8.89	atac_wt_pe
chrI	3059139	3059290	10.84	10.71	8.97	16.55	13.55	13.18	18.45	16.53	15.44	19.46	14.63	atac_wt_pe
chrI	3070090	3070241	8.44	6.83	3.75	9.00	6.20	6.24	7.84	5.69	7.05	9.11	8.24	atac_wt_pe
chrI	3085144	3085295	1.31	1.71	2.39	2.13	3.79	5.67	11.71	10.12	11.29	12.65	12.49	atac_glp1_se
chrI	3085398	3085549	1.01	1.83	2.06	2.78	4.38	8.83	17.77	13.71	17.84	17.18	15.98	atac_wt_pe
chrI	3087190	3087341	3.55	2.98	5.53	3.93	3.03	2.70	2.58	3.33	2.85	2.91	3.42	atac_wt_pe
chrI	3089163	3089314	4.77	1.67	1.27	1.69	2.82	1.37	1.06	1.04	1.06	0.94	1.20	atac_wt_pe
chrI	3089791	3089942	2.50	0.97	0.75	0.80	0.81	0.92	0.44	0.76	0.70	0.86	0.61	atac_wt_pe
chrI	3094265	3094416	0.72	0.98	0.95	0.59	0.78	3.22	3.60	2.03	3.03	3.25	2.15	atac_wt_pe
chrI	3096263	3096414	12.27	13.92	15.86	20.62	15.89	11.11	27.36	25.60	28.29	26.73	29.97	atac_wt_pe
chrI	3097465	3097616	1.87	1.84	2.23	1.87	2.09	1.68	2.42	2.37	3.21	3.88	3.60	atac_wt_pe
chrI	3098511	3098662	0.95	1.50	1.38	1.28	1.08	1.30	1.91	2.48	3.58	4.09	6.20	atac_glp1_se
chrI	3098785	3098936	1.27	1.60	1.39	1.52	1.82	1.67	1.86	1.76	2.31	2.94	4.45	atac_glp1_se
chrI	3099949	3100100	3.67	2.16	1.90	1.60	1.36	1.52	1.29	1.27	1.39	1.71	1.71	atac_wt_pe
chrI	3100924	3101075	6.28	3.52	4.39	3.03	2.90	2.65	1.68	2.29	2.35	2.52	3.23	atac_wt_pe
chrI	3101801	3101952	51.53	33.95	58.14	39.85	53.28	32.52	70.10	65.19	58.80	56.96	51.56	atac_wt_pe
chrI	3102199	3102350	10.15	8.02	9.67	6.59	10.95	8.62	13.36	14.48	12.77	12.26	7.87	atac_wt_pe
chrI	3103188	3103339	1.39	2.55	2.53	4.80	4.34	4.79	14.62	13.25	13.59	11.50	9.40	atac_wt_pe
chrI	3105186	3105337	3.42	2.52	2.61	2.52	2.21	2.86	1.22	1.63	1.15	1.35	1.68	atac_wt_pe
chrI	3105536	3105687	1.04	1.40	1.30	3.60	7.25	9.44	0.47	0.66	0.97	0.68	0.61	atac_wt_se
chrI	3105783	3105934	0.55	1.29	0.64	2.96	7.02	9.51	0.52	0.73	0.73	0.60	0.74	atac_wt_se
chrI	3106566	3106717	26.93	5.80	3.91	6.06	7.28	3.79	4.50	3.03	2.39	3.05	2.74	atac_wt_pe
chrI	3110728	3110879	2.81	4.60	4.41	5.87	6.19	4.80	6.43	6.11	4.85	5.37	4.65	atac_wt_pe
chrI	3113687	3113838	1.34	2.34	2.57	6.09	6.15	7.67	17.94	11.56	10.57	11.24	6.99	atac_wt_pe
chrI	3114017	3114168	1.25	1.79	1.69	3.03	3.20	5.46	10.62	7.74	9.41	9.64	6.85	atac_wt_pe
chrI	3117412	3117563	2.59	3.02	3.10	2.67	2.48	2.58	4.70	3.58	3.13	3.46	4.84	atac_glp1_se
chrI	3119100	3119251	3.25	8.51	12.12	18.61	20.55	18.64	43.22	26.55	26.39	23.62	22.98	atac_wt_pe
chrI	3121751	3121902	0.97	1.93	1.70	1.80	2.25	4.64	8.46	5.13	8.58	9.82	8.73	atac_wt_pe
chrI	3122057	3122208	1.85	3.00	3.34	3.89	3.37	5.48	13.91	11.45	16.14	16.27	12.21	atac_wt_pe
chrI	3123715	3123866	0.86	1.30	0.99	1.19	1.29	1.73	1.48	1.16	1.28	1.63	2.27	atac_wt_pe
chrI	3129734	3129885	1.54	1.59	2.33	2.79	2.99	3.01	6.45	5.85	6.59	7.16	6.74	atac_wt_pe
chrI	3137053	3137204	1.99	1.18	1.35	0.99	9.46	1.00	0.77	0.66	0.49	0.70	1.02	atac_wt_pe
chrI	3140605	3140756	3.84	7.48	10.39	6.62	7.40	9.60	19.38	15.21	17.51	18.24	20.77	atac_wt_pe
chrI	3143151	3143302	2.53	3.33	4.25	2.76	3.25	5.18	6.94	7.72	6.03	3.77	3.31	atac_wt_pe
chrI	3147847	3147998	7.48	6.74	4.58	9.17	8.40	9.25	10.36	9.10	8.21	9.98	10.48	atac_wt_pe
chrI	3148091	3148242	4.48	2.97	3.41	3.89	4.57	5.49	4.53	3.64	3.14	3.72	3.08	atac_wt_se
chrI	3151342	3151493	1.96	2.03	1.37	3.67	3.86	6.86	0.83	0.71	0.82	0.91	0.51	atac_wt_pe
chrI	3152117	3152268	1.50	1.46	1.14	5.95	11.43	17.01	0.64	0.77	0.61	0.67	1.07	atac_wt_pe
chrI	3152489	3152640	7.71	5.07	7.13	32.01	52.57	103.53	6.34	3.76	3.13	2.65	3.06	atac_wt_pe
chrI	3154658	3154809	1.83	1.50	2.35	1.86	3.09	2.28	2.45	2.97	2.47	2.67	3.11	atac_wt_pe
chrI	3156731	3156882	2.32	1.71	0.97	1.66	0.93	1.61	2.32	2.68	2.69	3.14	2.53	atac_wt_se
chrI	3158358	3158509	2.19	1.62	2.07	1.80	2.29	4.10	6.63	3.83	2.89	2.33	1.76	atac_wt_se
chrI	3158745	3158896	2.23	2.02	2.22	2.23	2.42	3.55	3.02	2.42	2.30	2.14	2.92	atac_glp1_se
chrI	3162537	3162688	63.57	56.53	53.98	91.70	71.67	67.20	84.13	72.77	73.03	82.66	70.25	atac_wt_pe
chrI	3176524	3176675	8.96	7.01	5.16	8.60	6.54	5.94	13.96	10.23	10.58	10.01	9.64	atac_wt_pe
chrI	3192543	3192694	4.30	2.45	2.65	2.67	2.76	2.81	4.64	3.53	3.35	3.80	4.56	atac_wt_pe
chrI	3192681	3192832	8.09	5.16	4.70	4.79	5.77	4.92	9.75	7.49	7.19	8.09	9.76	atac_wt_pe
chrI	3194864	3195015	1.96	1.83	2.05	2.52	2.28	1.61	1.73	1.85	1.43	1.81	1.91	atac_wt_pe
chrI	3195955	3196106	1.11	1.18	0.89	0.99	0.91	1.18	1.45	2.39	3.45	3.19	3.39	atac_glp1_se
chrI	3198968	3199119	0.82	1.30	1.31	4.29	7.94	11.11	0.32	0.36	0.31	0.49	0.42	atac_wt_pe
chrI	3205123	3205274	1.85	2.62	3.29	4.97	6.67	4.28	8.38	7.39	5.92	5.06	3.56	atac_wt_pe
chrI	3205457	3205608	1.35	1.80	1.58	2.54	3.39	2.49	4.01	2.86	2.04	2.01	2.37	atac_wt_se
chrI	3206478	3206629	3.14	1.87	4.55	3.86	5.55	4.62	11.21	7.72	7.24	4.78	3.23	atac_wt_pe
chrI	3207790	3207941	1.73	1.54	1.79	1.61	3.49	3.30	3.85	4.04	4.27	3.36	2.29	atac_wt_pe
chrI	3210403	3210554	0.45	1.12	0.48	4.11	2.96	3.43	2.70	2.20	2.96	2.43	2.47	atac_wt_pe
chrI	3212428	3212579	0.74	0.95	0.48	0.81	3.01	4.75	0.22	0.64	0.55	0.54	0.75	atac_wt_se
chrI	3216838	3216989	2.88	2.21	2.26	1.74	1.44	1.90	1.10	1.12	1.16	1.14	0.98	atac_wt_pe
chrI	3218826	3218977	0.89	1.73	1.36	2.47	2.39	1.78	4.69	2.15	1.86	1.25	1.25	atac_wt_pe
chrI	3222774	3222925	1.14	2.80	1.16	1.79	1.92	2.11	1.89	3.53	3.19	3.51	2.95	atac_glp1_se
chrI	3223002	3223153	0.59	1.86	0.99	1.63	1.86	2.44	2.68	2.10	3.25	3.45	4.35	atac_glp1_se
chrI	3228023	3228174	43.27	28.86	26.44	44.71	40.01	38.72	43.64	37.28	35.49	36.35	34.76	atac_wt_pe
chrI	3246257	3246408	19.55	14.82	18.92	15.66	22.19	12.28	17.47	19.24	19.48	14.22	14.17	atac_wt_pe
chrI	3246547	3246698	38.86	18.43	28.45	29.12	34.29	14.60	18.16	13.90	16.00	12.15	14.71	atac_wt_pe
chrI	3247098	3247249	12.91	13.95	16.09	13.13	19.01	8.48	18.63	14.92	15.33	15.34	15.78	atac_wt_pe
chrI	3247419	3247570	9.24	9.43	14.27	13.09	16.16	15.01	34.80	21.42	23.68	24.73	19.23	atac_wt_pe
chrI	3247899	3248050	8.45	9.65	13.00	12.59	17.68	8.90	24.45	16.28	22.46	24.87	23.78	atac_wt_pe
chrI	3248175	3248326	32.28	31.78	32.10	31.35	36.25	16.50	37.79	32.21	35.67	39.46	37.62	atac_wt_pe
chrI	3248625	3248776	30.10	25.40	31.00	25.73	31.56	14.83	39.42	39.49	44.24	40.47	46.93	atac_wt_pe
chrI	3249126	3249277	6.36	9.56	15.24	14.34	19.38	15.34	42.26	32.96	39.35	37.98	29.27	atac_wt_pe
chrI	3250664	3250815	8.86	7.05	7.34	5.03	4.41	3.28	3.06	3.05	3.84	4.27	5.33	atac_wt_pe
chrI	3250840	3250991	7.04	7.20	7.24	4.93	4.20	3.09	3.13	3.09	4.21	3.90	5.00	atac_wt_pe
chrI	3251177	3251328	1.89	3.04	2.86	2.16	2.21	1.85	3.03	1.57	1.07	1.25	1.60	atac_glp1_se
chrI	3256133	3256284	1.94	2.05	1.38	1.80	1.96	2.48	3.39	5.79	4.90	6.05	9.98	atac_glp1_se
chrI	3257972	3258123	0.91	0.96	0.90	0.94	0.74	1.04	0.71	1.15	1.55	1.74	2.40	atac_glp1_se
chrI	3265372	3265523	1.09	1.94	1.28	2.56	3.85	5.12	1.32	2.23	3.54	3.52	2.56	atac_wt_pe
chrI	3266001	3266152	9.65	14.73	10.52	19.17	13.71	10.20	19.17	15.06	16.96	18.87	21.67	atac_wt_pe
chrI	3266700	3266851	11.39	14.98	6.56	15.74	12.06	10.22	12.64	10.66	12.39	13.82	15.16	atac_wt_pe
chrI	3267087	3267238	1.59	2.61	1.83	2.26	2.70	3.77	1.26	1.69	1.91	1.97	1.31	atac_wt_se
chrI	3269147	3269298	1.59	1.70	1.17	1.66	2.46	4.58	1.33	0.79	0.82	0.96	0.79	atac_wt_se
chrI	3269636	3269787	5.02	4.23	3.13	4.68	4.62	4.88	2.05	1.72	1.55	1.13	1.52	atac_wt_pe
chrI	3277895	3278046	3.31	3.58	7.29	6.96	2.23	4.78	12.92	6.71	2.31	2.25	2.77	atac_wt_pe
chrI	3280813	3280964	2.20	1.70	3.76	3.05	1.89	2.44	3.23	1.79	1.16	1.31	0.98	atac_wt_pe
chrI	3281761	3281912	1.85	1.68	3.35	1.92	1.50	2.69	5.75	1.27	0.80	0.59	0.55	atac_wt_pe
chrI	3282978	3283129	2.01	1.25	1.89	3.61	2.49	1.06	1.21	0.88	0.58	0.56	0.69	atac_wt_pe
chrI	3284353	3284504	3.26	1.96	1.93	2.07	2.76	1.34	0.92	1.15	0.67	0.76	0.64	atac_wt_se
chrI	3287380	3287531	3.24	2.00	1.94	1.58	1.58	1.30	0.67	0.82	0.65	0.53	0.65	atac_wt_se
chrI	3292858	3293009	1.69	2.78	3.71	4.56	2.35	4.12	13.01	12.83	11.74	6.19	4.63	atac_glp1_se
chrI	3293322	3293473	1.59	2.44	3.21	4.98	3.39	4.99	8.90	8.35	8.57	3.66	3.74	atac_wt_pe
chrI	3293865	3294016	1.68	2.13	1.90	2.81	1.95	2.48	6.92	4.45	4.01	2.85	2.71	atac_glp1_se
chrI	3295374	3295525	0.78	2.72	2.28	1.78	2.63	2.50	4.50	4.56	4.03	4.46	4.91	atac_wt_pe
chrI	3296036	3296187	0.51	1.32	0.92	0.96	0.76	1.46	2.51	2.03	2.54	2.47	2.33	atac_glp1_se
chrI	3297135	3297286	1.21	3.97	5.24	7.11	5.58	8.87	23.55	20.00	20.05	17.19	13.33	atac_wt_pe
chrI	3298279	3298430	1.47	3.09	5.07	4.47	3.30	4.23	9.43	7.88	6.42	5.49	4.79	atac_wt_pe
chrI	3307408	3307559	3.47	3.25	3.68	2.49	1.91	2.25	2.92	3.63	4.77	3.58	3.78	atac_glp1_se
chrI	3307949	3308100	3.16	3.57	3.89	2.28	1.65	1.82	1.92	2.46	2.65	2.95	2.85	atac_wt_pe
chrI	3309692	3309843	2.78	4.52	7.42	12.73	8.93	9.64	25.70	17.15	12.28	15.61	9.17	atac_wt_pe
chrI	3311204	3311355	1.49	2.87	2.96	2.55	2.54	2.38	3.69	3.17	3.55	3.47	4.52	atac_wt_pe
chrI	3313192	3313343	3.46	2.61	4.03	2.54	2.18	1.98	1.79	2.01	1.42	1.99	2.63	atac_wt_pe
chrI	3316619	3316770	2.93	3.61	7.10	9.72	9.66	8.25	21.79	19.93	18.69	17.25	16.05	atac_wt_pe
chrI	3325003	3325154	3.19	10.47	11.72	8.29	9.10	7.23	14.32	12.77	11.46	12.24	15.14	atac_wt_pe
chrI	3328805	3328956	1.51	2.11	1.94	2.32	3.03	3.37	4.15	2.83	2.60	2.28	1.20	atac_wt_pe
chrI	3330903	3331054	4.02	4.72	11.56	12.28	19.81	14.66	32.85	23.44	26.38	30.13	24.77	atac_wt_pe
chrI	3332769	3332920	27.54	10.37	16.16	11.62	18.19	10.44	22.83	20.95	23.02	24.82	28.88	atac_wt_pe
chrI	3334043	3334194	0.63	1.48	0.85	2.06	3.93	5.99	0.87	0.65	1.10	0.89	1.31	atac_wt_pe
chrI	3334559	3334710	92.78	68.50	85.38	103.13	75.59	56.36	112.13	106.12	108.34	114.63	110.54	atac_wt_pe
chrI	3335972	3336123	4.06	3.43	3.44	3.79	3.05	2.42	3.50	3.51	3.62	3.76	3.46	atac_wt_se
chrI	3336240	3336391	9.04	4.04	4.41	3.49	3.04	2.73	3.03	2.41	2.62	3.38	3.43	atac_wt_pe
chrI	3337471	3337622	1.78	1.34	1.93	3.18	3.42	3.10	5.49	6.03	9.52	9.05	10.02	atac_wt_pe
chrI	3338374	3338525	88.34	11.92	18.09	36.84	24.33	9.44	11.82	10.26	10.28	11.49	12.78	atac_wt_pe
chrI	3349599	3349750	3.89	2.85	2.22	2.73	2.91	4.05	1.65	2.02	1.42	2.16	2.71	atac_wt_se
chrI	3349969	3350120	12.92	12.10	10.57	17.14	18.48	20.04	20.15	17.52	16.77	18.32	19.41	atac_wt_pe
chrI	3351479	3351630	2.17	2.28	2.32	1.39	1.93	1.91	2.51	1.60	1.92	2.01	2.17	atac_glp1_se
chrI	3353497	3353648	1.74	1.45	1.93	1.54	1.97	1.59	3.56	4.01	3.75	3.46	3.96	atac_glp1_se
chrI	3366912	3367063	0.88	0.63	0.39	0.69	1.34	3.04	0.31	0.41	0.48	0.48	0.37	atac_wt_pe
chrI	3367201	3367352	0.80	0.78	0.52	2.05	2.20	10.09	0.40	0.45	0.54	0.61	0.34	atac_wt_pe
chrI	3368049	3368200	2.06	1.91	1.86	2.04	2.83	5.42	0.67	0.79	0.56	0.61	0.76	atac_wt_se
chrI	3368647	3368798	0.43	0.56	0.58	1.26	2.61	5.86	0.09	0.13	0.19	0.24	0.21	atac_wt_pe
chrI	3371518	3371669	0.71	0.92	0.67	1.42	1.75	3.37	0.25	0.40	0.27	0.41	0.53	atac_wt_se
chrI	3380344	3380495	1.87	1.66	1.91	1.75	1.93	1.85	2.03	2.11	2.92	2.96	3.19	atac_glp1_se
chrI	3381723	3381874	12.07	10.75	13.37	15.40	12.84	6.57	11.29	11.18	9.31	8.73	11.32	atac_wt_pe
chrI	3382723	3382874	3.62	6.78	5.52	11.62	6.92	3.77	8.50	10.31	10.67	12.45	12.85	atac_wt_pe
chrI	3385281	3385432	4.19	3.48	4.14	3.63	2.75	2.18	1.55	2.38	1.73	2.40	2.89	atac_wt_pe
chrI	3386499	3386650	10.46	7.67	13.78	7.91	7.08	4.26	4.23	2.53	2.85	3.78	5.21	atac_wt_pe
chrI	3392043	3392194	0.46	1.87	0.91	1.37	1.27	1.77	0.76	1.09	0.67	0.55	0.73	atac_wt_se
chrI	3393558	3393709	0.15	1.09	0.13	1.71	1.53	5.69	2.15	1.14	0.94	1.12	1.39	atac_wt_pe
chrI	3398643	3398794	5.17	3.04	2.52	2.63	1.84	1.48	1.12	1.59	1.09	1.53	1.76	atac_wt_pe
chrI	3404183	3404334	1.70	2.31	2.43	2.21	2.46	1.95	3.03	2.71	2.23	1.55	2.26	atac_glp1_se
chrI	3405713	3405864	12.06	16.95	32.41	17.99	15.33	7.72	15.18	16.79	13.68	16.42	16.36	atac_wt_pe
chrI	3407162	3407313	2.06	1.59	1.60	3.26	2.83	1.22	0.94	0.83	0.74	0.53	0.87	atac_wt_pe
chrI	3408047	3408198	1.17	2.28	1.31	2.02	2.22	1.45	2.54	2.33	2.06	2.18	2.27	atac_wt_pe
chrI	3409463	3409614	0.97	1.41	0.69	1.51	1.95	3.38	1.06	0.93	1.56	1.55	1.73	atac_wt_se
chrI	3409818	3409969	14.73	10.79	8.43	15.36	11.35	12.00	19.54	14.17	16.57	18.13	16.44	atac_wt_pe
chrI	3412391	3412542	0.76	2.89	1.01	1.54	1.75	2.27	10.31	10.32	10.73	10.80	9.90	atac_wt_pe
chrI	3416403	3416554	5.14	3.35	3.54	2.30	1.93	2.49	2.53	3.08	1.84	2.70	2.36	atac_wt_pe
chrI	3418046	3418197	1.79	3.02	2.97	3.27	3.22	2.42	3.77	3.55	3.06	4.18	6.04	atac_wt_pe
chrI	3419487	3419638	5.74	7.24	8.70	6.26	8.14	6.04	14.15	16.12	13.14	15.63	17.63	atac_wt_pe
chrI	3423634	3423785	1.43	1.98	1.95	2.70	2.06	1.22	1.22	1.10	1.08	1.28	2.14	atac_wt_pe
chrI	3425959	3426110	3.43	3.56	4.13	2.50	1.83	1.62	1.92	2.23	1.58	2.52	3.36	atac_wt_pe
chrI	3427879	3428030	1.97	2.40	2.05	1.35	1.49	2.04	0.73	1.26	0.81	0.98	1.02	atac_wt_pe
chrI	3428792	3428943	0.46	2.70	3.43	1.80	2.62	2.59	0.37	0.74	0.41	0.40	0.44	atac_wt_pe
chrI	3429213	3429364	2.35	1.69	2.04	1.28	1.16	1.67	0.60	0.62	0.55	0.60	0.79	atac_wt_pe
chrI	3438654	3438805	2.91	2.27	1.89	5.86	10.67	12.66	1.60	1.87	2.07	1.99	2.04	atac_wt_pe
chrI	3438906	3439057	8.16	5.64	4.17	12.98	13.98	13.25	7.86	6.23	6.28	7.78	7.01	atac_wt_pe
chrI	3445284	3445435	4.45	2.79	1.95	2.29	1.87	1.91	1.13	0.59	0.71	0.90	1.23	atac_wt_pe
chrI	3464179	3464330	1.31	1.79	0.84	0.91	0.91	1.70	0.87	1.83	1.86	1.89	1.73	atac_glp1_se
chrI	3466436	3466587	1.22	1.33	0.64	1.26	2.76	6.30	0.67	0.36	1.13	0.94	0.93	atac_wt_pe
chrI	3466799	3466950	11.95	10.06	7.59	13.32	9.11	10.14	13.84	9.00	10.41	13.54	13.31	atac_wt_pe
chrI	3471403	3471554	2.39	2.04	2.22	1.75	2.36	2.55	2.88	3.47	3.94	4.20	3.76	atac_glp1_se
chrI	3472833	3472984	6.30	4.43	3.52	3.11	5.86	4.78	7.36	6.40	4.73	5.61	5.65	atac_wt_pe
chrI	3473940	3474091	2.20	1.41	1.72	1.57	2.72	1.52	1.46	2.98	3.75	3.69	4.04	atac_glp1_se
chrI	3476227	3476378	1.64	1.35	1.43	1.68	8.09	1.83	1.02	1.05	1.38	1.25	1.20	atac_wt_pe
chrI	3480279	3480430	1.36	1.73	0.88	1.33	1.42	1.78	1.66	0.78	1.23	0.97	1.53	atac_glp1_se
chrI	3481498	3481649	2.36	2.58	1.88	3.71	4.69	5.93	6.10	3.93	3.94	4.79	4.75	atac_wt_pe
chrI	3484210	3484361	3.60	2.14	1.95	2.04	1.67	1.63	0.78	0.77	0.90	1.10	1.16	atac_wt_se
chrI	3494371	3494522	6.02	1.72	1.79	1.45	1.26	1.38	0.69	0.87	0.49	0.83	0.76	atac_wt_pe
chrI	3499702	3499853	17.43	6.29	5.76	4.46	2.57	2.89	2.05	2.44	2.17	2.62	2.66	atac_wt_pe
chrI	3500164	3500315	2.38	1.98	1.25	1.56	2.52	1.18	1.27	1.19	0.97	1.52	1.42	atac_wt_pe
chrI	3500773	3500924	8.18	7.72	6.68	7.20	6.14	6.12	7.15	6.64	6.01	6.27	5.38	atac_wt_pe
chrI	3501231	3501382	66.23	44.96	48.67	57.85	47.75	46.62	93.70	72.83	82.65	81.10	81.77	atac_wt_pe
chrI	3502730	3502881	2.00	2.32	3.53	3.40	7.07	9.65	19.77	13.06	13.67	12.18	9.92	atac_wt_pe
chrI	3508689	3508840	1.68	1.43	1.27	0.99	1.39	1.72	3.13	2.30	1.95	1.82	1.71	atac_glp1_se
chrI	3510620	3510771	2.37	2.76	1.92	1.84	4.49	2.35	3.72	5.19	4.98	4.93	5.77	atac_wt_pe
chrI	3512930	3513081	2.21	1.54	1.59	2.49	2.74	1.40	0.96	1.21	1.24	1.29	0.95	atac_wt_pe
chrI	3514398	3514549	74.50	78.81	97.73	107.09	98.56	45.28	114.83	106.22	101.76	99.60	96.54	atac_wt_pe
chrI	3515544	3515695	0.68	1.72	1.06	2.00	3.08	2.56	5.46	3.63	4.34	3.31	3.03	atac_wt_pe
chrI	3516378	3516529	4.99	3.43	1.43	2.91	2.38	3.23	2.86	1.97	2.75	3.20	4.15	atac_wt_pe
chrI	3529462	3529613	1.68	1.92	2.24	1.86	1.79	2.28	2.24	1.39	0.86	0.91	0.82	atac_glp1_se
chrI	3529958	3530109	2.40	3.13	8.98	4.33	2.68	7.53	9.69	3.62	1.54	1.36	1.89	atac_wt_pe
chrI	3531005	3531156	3.00	5.04	10.53	7.73	5.98	6.76	11.76	7.71	4.52	3.79	2.59	atac_wt_pe
chrI	3533804	3533955	1.96	5.65	8.45	12.19	15.77	12.77	27.13	20.47	20.85	20.50	16.03	atac_wt_pe
chrI	3534565	3534716	0.72	2.29	2.25	3.47	4.02	4.97	8.46	7.37	8.74	8.87	7.50	atac_wt_pe
chrI	3546983	3547134	13.56	16.08	11.92	29.00	25.12	24.02	28.95	22.37	23.21	24.90	22.16	atac_wt_pe
chrI	3553396	3553547	2.43	1.93	1.43	7.08	9.01	21.55	7.29	1.70	4.71	7.60	9.35	atac_wt_pe
chrI	3560089	3560240	3.16	6.76	8.56	5.89	3.64	6.44	11.56	8.41	7.14	5.66	4.94	atac_wt_pe
chrI	3562618	3562769	2.04	2.95	3.25	4.31	4.82	5.59	4.66	4.30	5.42	5.29	4.05	atac_wt_se
chrI	3562922	3563073	1.77	5.47	4.21	8.03	8.72	11.71	21.88	15.65	19.31	15.69	13.69	atac_wt_pe
chrI	3563952	3564103	1.54	1.86	1.74	2.39	3.12	7.93	13.59	13.21	15.49	11.23	5.35	atac_wt_pe
chrI	3600818	3600969	3.96	3.89	2.92	6.32	5.68	5.10	7.07	5.56	5.61	6.86	6.27	atac_wt_pe
chrI	3603248	3603399	27.90	3.52	2.64	3.47	3.01	5.51	1.02	1.12	0.82	0.93	0.88	atac_wt_pe
chrI	3603868	3604019	1.36	1.29	0.62	2.72	6.42	9.33	0.25	0.30	0.41	0.41	0.40	atac_wt_pe
chrI	3605737	3605888	7.30	5.38	3.67	5.92	6.47	4.87	7.01	5.61	5.60	6.09	5.76	atac_wt_pe
chrI	3608272	3608423	0.77	0.81	0.65	1.62	2.43	3.94	0.22	0.31	0.37	0.34	0.35	atac_wt_se
chrI	3620423	3620574	9.56	5.56	6.24	4.07	3.98	2.01	3.29	2.94	2.96	3.68	5.15	atac_wt_pe
chrI	3622089	3622240	6.03	2.08	2.58	2.53	1.74	1.32	0.91	1.12	1.06	0.93	0.98	atac_wt_pe
chrI	3623935	3624086	5.29	3.34	3.24	2.15	1.18	1.61	0.62	0.71	0.72	0.90	0.98	atac_wt_pe
chrI	3627130	3627281	8.74	11.91	16.05	9.69	5.57	3.87	5.81	7.04	5.66	7.73	8.75	atac_wt_pe
chrI	3632045	3632196	5.12	2.86	3.16	6.25	3.70	2.64	4.10	5.86	5.44	8.05	10.64	atac_wt_pe
chrI	3636618	3636769	52.31	46.58	45.39	57.10	47.45	32.92	79.19	73.12	71.18	72.72	60.71	atac_wt_pe
chrI	3637337	3637488	1.01	7.58	3.16	4.61	5.28	4.69	9.63	8.46	7.58	8.70	7.32	atac_wt_pe
chrI	3638878	3639029	4.47	7.19	9.43	21.84	22.83	28.34	46.55	29.57	40.56	37.73	34.57	atac_wt_pe
chrI	3644849	3645000	1.48	2.28	1.87	1.39	1.56	2.02	2.42	3.52	4.56	4.60	4.42	atac_glp1_se
chrI	3646074	3646225	4.09	5.81	6.18	4.09	5.09	2.71	3.43	3.58	2.83	3.41	4.17	atac_wt_pe
chrI	3646887	3647038	3.44	5.61	5.17	3.31	2.24	1.85	2.44	2.06	1.56	1.70	2.35	atac_wt_pe
chrI	3648172	3648323	59.26	85.40	145.53	84.64	62.04	28.97	54.83	59.31	52.64	65.43	76.19	atac_wt_pe
chrI	3649418	3649569	2.18	4.38	3.97	2.50	2.00	1.41	1.45	1.50	1.27	1.86	2.53	atac_wt_pe
chrI	3650790	3650941	6.62	9.19	15.72	8.19	6.37	2.93	4.21	5.13	2.95	4.63	6.52	atac_wt_pe
chrI	3652776	3652927	3.09	2.53	2.58	1.63	2.76	3.06	2.43	5.97	4.50	3.44	2.03	atac_wt_pe
chrI	3663150	3663301	1.03	1.28	1.20	1.18	1.10	1.76	3.03	1.37	1.23	1.98	1.36	atac_glp1_se
chrI	3663568	3663719	1.21	1.94	1.96	4.57	4.18	4.56	10.62	6.43	8.81	9.02	7.20	atac_wt_pe
chrI	3664046	3664197	0.81	0.99	0.61	1.63	2.37	2.40	3.09	2.12	2.44	3.19	2.33	atac_wt_se
chrI	3668889	3669040	1.16	1.65	1.34	1.47	1.56	1.94	1.22	4.06	3.64	3.24	2.37	atac_glp1_se
chrI	3669946	3670097	1.05	1.77	1.61	1.42	1.59	1.28	1.26	2.03	2.13	1.97	2.04	atac_glp1_se
chrI	3671318	3671469	0.76	1.98	1.41	2.53	2.58	2.72	4.89	4.87	5.83	5.86	3.95	atac_wt_se
chrI	3671831	3671982	11.52	13.16	14.04	25.51	19.11	7.63	10.59	12.81	11.66	11.41	11.84	atac_wt_pe
chrI	3672770	3672921	1.50	3.65	6.65	7.48	7.11	6.59	19.15	13.48	15.51	15.67	10.97	atac_wt_pe
chrI	3675840	3675991	2.10	3.44	6.24	3.79	5.99	4.11	5.52	4.88	3.86	5.34	6.07	atac_wt_pe
chrI	3678023	3678174	1.70	1.80	1.23	1.50	2.30	1.40	0.82	1.00	0.99	1.06	1.29	atac_wt_pe
chrI	3678908	3679059	1.98	1.47	1.60	1.36	2.51	1.72	1.06	1.40	1.31	1.17	1.22	atac_wt_pe
chrI	3680104	3680255	1.67	2.29	2.04	4.79	5.29	4.43	11.21	6.80	7.51	6.39	5.07	atac_wt_pe
chrI	3680889	3681040	2.82	6.38	8.45	8.36	8.63	7.26	13.89	8.71	10.26	7.89	7.17	atac_wt_pe
chrI	3682041	3682192	4.01	10.64	15.42	20.69	21.49	18.67	47.47	43.75	52.02	49.04	42.27	atac_wt_pe
chrI	3682953	3683104	4.63	3.70	3.07	2.82	3.71	4.00	5.92	6.96	7.22	8.54	10.04	atac_wt_pe
chrI	3684062	3684213	0.83	1.81	1.14	1.89	3.99	6.67	1.34	1.65	1.67	2.10	2.76	atac_wt_se
chrI	3684385	3684536	11.25	4.41	4.32	5.37	7.35	8.81	7.49	10.71	9.01	10.14	13.52	atac_wt_pe
chrI	3684579	3684730	17.05	10.30	12.16	12.40	13.55	13.52	22.98	24.97	22.95	23.19	25.33	atac_wt_pe
chrI	3697721	3697872	0.46	0.86	0.55	3.05	6.22	12.66	0.48	0.49	0.54	0.61	0.46	atac_wt_pe
chrI	3698021	3698172	1.09	3.29	2.28	3.16	4.39	6.56	6.25	4.17	4.01	3.01	2.87	atac_wt_pe
chrI	3700549	3700700	0.29	0.48	0.43	0.98	2.03	3.70	0.32	0.30	0.29	0.33	0.25	atac_wt_pe
chrI	3709260	3709411	3.12	2.26	2.52	2.18	1.71	1.79	1.75	1.83	1.68	2.46	1.60	atac_wt_se
chrI	3709958	3710109	6.84	8.77	7.57	9.00	8.89	9.02	27.58	25.94	28.22	20.40	16.16	atac_wt_pe
chrI	3710349	3710500	1.93	2.09	1.74	2.50	2.05	2.62	5.11	4.25	6.56	5.32	4.95	atac_glp1_se
chrI	3710752	3710903	1.71	1.96	2.85	2.71	3.94	4.77	9.24	9.45	13.23	14.99	11.28	atac_wt_pe
chrI	3713557	3713708	2.37	5.01	3.65	4.32	4.93	6.09	7.40	4.24	4.70	3.86	6.40	atac_wt_pe
chrI	3714098	3714249	2.37	2.16	1.77	2.40	2.77	2.50	2.61	2.64	3.38	2.68	2.90	atac_wt_pe
chrI	3714867	3715018	2.10	2.43	1.85	2.06	2.15	1.70	2.95	5.18	4.27	2.40	1.74	atac_glp1_se
chrI	3720847	3720998	3.86	8.81	7.37	9.81	12.66	6.99	15.32	15.99	22.74	18.92	27.35	atac_wt_pe
chrI	3721447	3721598	201.94	120.99	246.84	153.86	154.89	95.07	201.56	197.51	171.25	171.95	166.80	atac_wt_pe
chrI	3721706	3721857	197.86	131.77	276.73	168.81	178.04	116.98	205.21	200.28	178.83	182.14	172.78	atac_wt_pe
chrI	3722661	3722812	2.24	4.65	3.05	4.04	2.82	2.36	4.89	7.00	7.17	7.80	9.16	atac_wt_pe
chrI	3723524	3723675	9.89	19.39	26.03	24.84	25.24	23.13	54.77	50.55	43.26	37.69	37.88	atac_wt_pe
chrI	3724769	3724920	11.63	10.43	16.59	20.10	17.41	11.69	20.25	26.01	22.75	22.34	23.24	atac_wt_pe
chrI	3726518	3726669	1.22	1.35	0.90	1.61	3.86	5.93	0.63	1.08	1.02	1.21	0.89	atac_wt_pe
chrI	3726687	3726838	0.55	0.60	0.35	1.39	3.68	7.05	0.36	0.38	0.37	0.70	0.52	atac_wt_pe
chrI	3727423	3727574	1.07	1.57	1.50	1.59	1.60	3.10	0.57	1.18	0.56	0.97	0.79	atac_wt_se
chrI	3733801	3733952	1.44	0.89	0.67	1.10	1.35	1.40	2.32	3.00	3.86	4.33	4.04	atac_glp1_se
chrI	3734338	3734489	1.57	1.85	1.52	1.56	1.67	2.13	2.32	2.49	3.24	2.77	2.99	atac_glp1_se
chrI	3737676	3737827	2.77	2.96	3.48	3.87	5.67	4.05	4.48	5.33	3.43	3.90	4.36	atac_wt_pe
chrI	3738257	3738408	16.53	10.00	19.47	31.78	52.80	23.85	39.64	31.60	28.47	27.21	26.99	atac_wt_pe
chrI	3738973	3739124	1.40	2.30	2.42	3.82	5.35	5.59	6.83	3.54	2.59	2.59	2.91	atac_wt_pe
chrI	3739338	3739489	6.41	6.14	4.85	7.56	7.38	4.10	4.76	3.63	3.27	3.20	3.54	atac_wt_pe
chrI	3739993	3740144	5.51	4.43	6.29	7.34	6.92	3.55	2.69	3.58	3.07	3.62	3.37	atac_wt_pe
chrI	3740473	3740624	117.26	130.36	212.93	172.86	143.77	86.74	186.80	188.15	179.79	183.38	167.54	atac_wt_pe
chrI	3741224	3741375	6.27	9.49	3.47	7.62	8.86	10.25	10.57	7.53	8.32	10.74	10.23	atac_wt_pe
chrI	3744292	3744443	1.69	2.22	3.48	2.33	2.48	1.93	1.79	2.22	2.05	2.20	2.58	atac_wt_pe
chrI	3744855	3745006	1.42	1.34	1.45	1.31	1.49	1.71	1.36	1.10	1.88	2.87	3.24	atac_glp1_se
chrI	3749268	3749419	11.21	8.40	8.18	5.40	3.60	2.15	1.14	1.36	0.98	1.21	0.92	atac_wt_pe
chrI	3750304	3750455	3.49	4.41	3.93	2.68	1.69	1.74	1.72	1.82	1.19	1.27	1.47	atac_wt_pe
chrI	3751446	3751597	4.25	5.56	3.95	2.78	2.15	1.55	1.48	1.42	1.45	1.04	1.09	atac_wt_pe
chrI	3752233	3752384	4.34	7.49	5.27	2.82	2.38	2.41	3.02	2.93	2.52	2.02	1.89	atac_wt_pe
chrI	3752858	3753009	2.60	4.98	4.41	2.57	2.20	2.45	4.79	5.04	4.38	4.61	4.34	atac_wt_pe
chrI	3754551	3754702	6.80	23.59	21.04	23.98	15.72	12.02	28.69	20.48	21.64	21.91	26.32	atac_wt_pe
chrI	3759130	3759281	47.53	51.72	81.29	61.62	62.19	34.48	59.56	59.08	52.48	49.43	48.66	atac_wt_pe
chrI	3762698	3762849	1.02	1.34	1.63	1.20	3.12	2.11	3.15	2.69	2.69	3.04	2.30	atac_glp1_se
chrI	3781575	3781726	34.75	28.65	34.13	32.63	25.75	19.87	30.82	33.62	30.83	39.53	35.37	atac_wt_pe
chrI	3781778	3781929	35.13	23.31	23.98	30.20	28.38	26.18	31.50	27.45	27.40	32.87	33.00	atac_wt_pe
chrI	3784393	3784544	1.98	2.63	2.64	2.67	5.76	5.91	5.28	3.76	3.59	3.82	3.75	atac_glp1_se
chrI	3784566	3784717	1.34	1.83	1.99	3.75	9.19	11.07	3.02	2.11	2.11	2.72	2.57	atac_wt_pe
chrI	3785307	3785458	23.86	38.12	44.61	33.38	31.41	19.46	34.98	35.19	34.96	37.51	43.92	atac_wt_pe
chrI	3786028	3786179	5.70	5.01	9.45	8.28	11.85	7.83	11.94	8.74	8.17	8.66	12.66	atac_wt_pe
chrI	3787704	3787855	27.58	30.65	37.25	33.30	49.83	44.36	30.46	27.56	27.84	30.04	25.56	atac_wt_pe
chrI	3788178	3788329	3.61	4.74	3.79	4.10	6.37	8.04	1.49	2.44	2.47	2.90	2.93	atac_wt_se
chrI	3788682	3788833	2.21	2.52	2.20	2.83	3.77	6.12	0.96	1.39	1.25	1.14	1.58	atac_wt_se
chrI	3793489	3793640	9.01	2.55	4.05	17.29	11.37	4.16	2.62	2.71	1.62	1.69	1.20	atac_wt_pe
chrI	3798625	3798776	1.52	5.51	3.89	6.48	5.79	6.46	8.73	6.70	10.13	6.38	5.29	atac_wt_pe
chrI	3805690	3805841	5.21	8.19	9.51	12.22	15.08	16.84	36.06	25.93	26.50	27.30	24.20	atac_wt_pe
chrI	3806041	3806192	1.32	2.03	2.26	5.59	8.96	14.32	2.92	2.08	2.36	2.82	2.36	atac_wt_pe
chrI	3806645	3806796	49.04	53.81	64.89	71.20	50.88	26.30	47.38	49.59	41.52	51.28	51.31	atac_wt_pe
chrI	3807521	3807672	1.82	3.90	3.08	2.79	2.55	2.49	2.06	2.16	2.00	2.26	2.82	atac_wt_pe
chrI	3816963	3817114	10.06	5.50	6.64	7.11	10.44	6.82	8.14	7.98	6.78	6.60	7.58	atac_wt_pe
chrI	3817368	3817519	1.39	2.15	1.29	3.74	7.27	11.91	1.33	1.68	2.00	1.72	1.61	atac_wt_pe
chrI	3817840	3817991	8.17	9.65	7.74	11.50	12.63	11.31	19.69	16.91	15.35	17.08	14.92	atac_wt_pe
chrI	3821343	3821494	0.32	1.37	0.49	0.99	1.39	1.84	1.68	2.90	4.17	2.44	2.03	atac_glp1_se
chrI	3821768	3821919	0.84	2.05	1.39	1.80	2.33	3.41	5.51	5.42	6.50	4.51	3.45	atac_wt_pe
chrI	3822332	3822483	6.37	7.48	12.39	7.46	5.84	4.34	5.35	6.37	6.18	7.40	8.21	atac_wt_pe
chrI	3822747	3822898	26.65	57.06	84.61	58.89	37.32	24.98	65.02	75.18	75.01	76.43	76.54	atac_wt_pe
chrI	3823254	3823405	2.64	5.18	4.39	5.01	5.46	3.50	4.16	4.45	3.99	4.26	4.88	atac_wt_se
chrI	3823581	3823732	7.12	13.38	8.11	9.24	6.45	4.73	6.84	7.15	7.14	9.19	9.99	atac_wt_pe
chrI	3824339	3824490	69.41	70.29	86.18	89.89	61.27	47.13	118.79	117.04	127.92	129.49	122.61	atac_wt_pe
chrI	3824702	3824853	7.26	10.76	14.93	16.18	16.78	13.08	37.15	44.20	54.06	54.33	61.20	atac_wt_pe
chrI	3825169	3825320	2.54	4.48	3.01	4.10	3.41	3.31	2.94	3.56	4.16	4.07	4.71	atac_wt_se
chrI	3825853	3826004	2.30	2.67	2.87	2.81	2.85	3.38	2.33	2.89	2.46	2.67	2.82	atac_wt_se
chrI	3826565	3826716	0.87	2.54	1.75	2.09	2.97	4.08	5.16	3.21	4.04	3.38	2.61	atac_glp1_se
chrI	3827080	3827231	1.47	2.39	2.05	2.46	2.69	4.01	4.41	4.65	5.92	4.53	7.28	atac_wt_pe
chrI	3828462	3828613	1.66	2.49	1.84	2.26	2.39	4.06	2.51	3.69	3.44	2.44	2.87	atac_glp1_se
chrI	3829376	3829527	19.24	14.26	10.59	17.23	17.57	17.75	16.04	11.10	11.83	13.92	11.94	atac_wt_pe
chrI	3829776	3829927	13.94	31.02	33.76	43.15	30.70	27.22	54.39	62.43	70.82	70.31	60.28	atac_wt_pe
chrI	3830273	3830424	0.96	3.07	2.85	4.15	3.77	6.09	8.81	4.07	6.01	5.85	5.28	atac_wt_pe
chrI	3830726	3830877	1.67	3.18	3.39	6.18	5.81	5.99	15.99	21.58	27.59	22.87	17.59	atac_wt_pe
chrI	3831139	3831290	2.68	3.02	3.21	3.14	3.37	3.45	2.61	4.21	4.82	5.13	4.49	atac_wt_se
chrI	3832932	3833083	2.19	1.89	2.21	2.28	2.90	2.77	2.61	3.94	4.16	3.55	2.75	atac_glp1_se
chrI	3837735	3837886	7.76	5.80	6.52	5.79	4.71	3.21	4.26	3.75	2.73	4.16	5.13	atac_wt_pe
chrI	3839954	3840105	3.95	1.72	1.28	1.11	1.18	1.63	0.82	0.82	1.01	1.02	1.70	atac_wt_pe
chrI	3841580	3841731	2.48	2.58	2.90	1.98	2.85	4.33	7.51	4.95	5.72	6.92	7.37	atac_wt_pe
chrI	3842529	3842680	71.67	15.84	21.10	18.52	21.16	16.78	29.35	25.01	24.63	27.19	27.02	atac_wt_pe
chrI	3843701	3843852	1.32	1.69	1.03	2.10	3.03	2.34	3.05	5.58	5.76	5.95	5.22	atac_wt_se
chrI	3845901	3846052	42.68	4.81	4.35	4.90	4.84	4.33	2.75	1.77	1.80	1.60	2.15	atac_wt_pe
chrI	3858228	3858379	0.91	1.74	1.77	1.55	2.46	2.75	6.18	5.56	7.57	5.15	4.48	atac_glp1_se
chrI	3860730	3860881	1.56	3.24	2.23	2.88	3.80	3.13	7.98	7.01	7.74	7.26	6.20	atac_wt_pe
chrI	3861541	3861692	37.52	14.44	13.28	18.53	21.28	7.57	14.27	11.99	8.64	11.00	12.17	atac_wt_pe
chrI	3862006	3862157	4.87	5.55	6.15	5.65	7.98	7.82	13.99	9.40	9.65	10.08	8.97	atac_wt_pe
chrI	3862333	3862484	2.69	3.09	2.14	2.72	4.24	7.99	1.94	2.26	1.72	1.84	1.82	atac_wt_pe
chrI	3862529	3862680	5.00	5.44	3.70	4.92	7.78	9.95	2.99	3.37	2.16	2.81	3.03	atac_wt_pe
chrI	3863054	3863205	3.17	2.42	2.40	4.40	5.51	4.01	1.92	2.00	1.48	1.60	2.01	atac_wt_pe
chrI	3864583	3864734	2.17	2.01	1.91	2.12	2.67	2.73	2.98	2.19	2.41	3.27	4.63	atac_glp1_se
chrI	3865619	3865770	3.00	2.88	1.80	2.68	2.84	3.14	1.32	1.63	1.71	1.66	1.54	atac_wt_se
chrI	3866002	3866153	12.98	9.26	8.43	8.25	11.06	9.59	12.27	10.95	11.14	12.47	12.23	atac_wt_pe
chrI	3866659	3866810	4.53	3.32	1.98	6.60	14.53	35.18	2.82	3.04	2.44	1.99	2.33	atac_wt_pe
chrI	3866882	3867033	5.12	5.14	1.72	4.31	8.15	14.56	3.86	6.23	3.97	3.14	2.59	atac_wt_pe
chrI	3867315	3867466	8.89	16.34	12.76	15.52	18.08	16.32	32.47	33.16	27.59	24.33	20.62	atac_wt_pe
chrI	3873359	3873510	2.75	4.21	3.71	6.21	5.63	5.76	7.56	8.15	5.56	3.10	2.02	atac_wt_pe
chrI	3873896	3874047	16.26	19.62	15.24	27.18	26.39	25.73	23.76	18.07	16.24	20.67	17.14	atac_wt_pe
chrI	3876848	3876999	7.59	9.31	7.84	13.89	17.91	17.64	13.01	12.87	11.49	14.23	11.61	atac_wt_pe
chrI	3881446	3881597	0.68	1.19	0.81	0.90	1.00	1.92	0.86	0.63	0.81	0.59	0.92	atac_wt_pe
chrI	3887192	3887343	1.66	1.60	1.72	1.39	1.90	2.04	2.85	3.25	2.94	3.54	5.00	atac_glp1_se
chrI	3889279	3889430	4.69	3.83	5.11	3.61	4.10	3.21	2.71	2.27	2.15	2.85	4.37	atac_wt_pe
chrI	3891561	3891712	14.51	14.14	19.14	14.53	12.98	7.22	9.99	11.00	8.39	9.97	12.01	atac_wt_pe
chrI	3897338	3897489	1.11	1.07	0.75	0.87	2.33	1.18	0.48	0.43	0.49	0.40	0.60	atac_wt_se
chrI	3898742	3898893	7.13	3.73	3.57	3.95	4.21	2.48	1.22	1.55	0.95	0.50	1.16	atac_wt_pe
chrI	3899392	3899543	13.76	6.48	5.35	8.46	9.66	4.35	4.00	3.51	2.22	2.69	2.25	atac_wt_pe
chrI	3899822	3899973	30.33	15.83	8.73	22.61	35.23	10.91	15.02	11.84	10.75	9.39	7.80	atac_wt_pe
chrI	3900467	3900618	1.52	1.97	1.19	1.60	2.47	1.00	0.91	1.14	0.87	0.89	0.80	atac_wt_se
chrI	3906305	3906456	11.06	9.35	12.59	6.55	4.43	3.97	6.34	7.18	5.67	8.78	10.07	atac_wt_pe
chrI	3908048	3908199	21.86	3.53	2.60	2.39	3.00	2.85	1.10	1.36	1.01	1.25	1.22	atac_wt_pe
chrI	3908527	3908678	6.81	8.95	6.25	13.51	12.34	12.36	13.56	9.75	9.99	11.33	10.71	atac_wt_pe
chrI	3910626	3910777	4.16	5.86	3.51	5.23	6.09	7.20	7.25	6.34	6.33	7.41	6.29	atac_wt_pe
chrI	3911867	3912018	0.97	0.99	0.86	1.13	1.24	1.18	1.67	2.42	3.09	1.94	1.82	atac_glp1_se
chrI	3913554	3913705	3.03	1.98	1.79	1.26	1.76	1.78	0.92	1.08	0.93	0.94	0.83	atac_wt_se
chrI	3915772	3915923	3.75	1.64	1.42	2.18	2.17	1.40	0.81	0.97	0.53	0.57	0.74	atac_wt_pe
chrI	3916434	3916585	1.61	1.38	0.94	2.07	4.46	0.91	0.83	0.87	0.58	0.47	0.49	atac_wt_pe
chrI	3916778	3916929	9.54	2.23	3.22	9.55	15.19	1.89	1.42	1.35	1.31	1.00	1.16	atac_wt_pe
chrI	3928261	3928412	4.99	3.99	3.83	6.63	4.59	4.49	7.87	6.25	8.86	6.86	7.53	atac_wt_pe
chrI	3930190	3930341	2.58	1.96	1.40	1.38	2.40	2.36	3.40	4.19	5.03	4.71	4.97	atac_wt_se
chrI	3930523	3930674	6.68	5.01	4.23	4.85	6.42	5.38	10.75	10.36	11.05	11.45	11.67	atac_wt_pe
chrI	3931684	3931835	0.49	0.93	0.57	2.10	4.44	9.02	0.34	0.57	0.64	0.50	0.90	atac_wt_pe
chrI	3931842	3931993	1.06	1.25	1.00	3.04	6.07	13.46	0.30	0.50	0.48	0.43	0.50	atac_wt_pe
chrI	3934894	3935045	1.56	1.58	1.64	2.18	3.53	6.67	0.70	0.96	0.81	0.58	0.73	atac_wt_se
chrI	3935102	3935253	2.87	2.02	2.00	3.32	3.59	4.77	1.42	1.23	1.13	1.27	1.03	atac_wt_pe
chrI	3954088	3954239	1.84	1.95	1.77	1.30	1.40	1.97	3.65	4.20	3.83	3.18	3.45	atac_glp1_se
chrI	3954806	3954957	2.04	6.49	8.56	4.60	3.70	7.56	16.32	16.44	16.46	14.88	15.33	atac_wt_pe
chrI	3955487	3955638	1.84	2.37	3.36	2.80	2.23	2.05	2.78	2.42	2.04	2.32	2.51	atac_wt_pe
chrI	3956608	3956759	6.41	11.69	10.05	8.94	8.46	6.78	18.74	18.67	21.84	18.71	15.47	atac_wt_pe
chrI	3956801	3956952	9.21	9.00	10.84	9.88	9.16	7.49	19.80	20.38	22.33	19.95	16.37	atac_wt_pe
chrI	3957780	3957931	2.27	2.07	1.49	1.39	1.05	1.15	0.96	0.81	1.05	0.97	1.41	atac_wt_pe
chrI	3958530	3958681	5.95	5.13	7.97	5.34	5.49	4.20	5.00	4.61	4.05	4.71	6.51	atac_wt_pe
chrI	3959593	3959744	52.95	12.99	10.50	8.59	8.79	8.40	3.28	3.71	2.76	1.92	2.79	atac_wt_pe
chrI	3960280	3960431	4.77	2.32	1.32	1.41	2.56	1.52	0.83	1.03	1.18	1.04	0.90	atac_wt_pe
chrI	3976203	3976354	5.77	6.26	8.95	4.90	6.31	4.05	8.68	8.39	6.27	6.96	9.89	atac_wt_pe
chrI	3978657	3978808	0.79	1.25	1.45	1.33	1.82	1.20	1.08	3.86	5.37	4.94	4.25	atac_glp1_se
chrI	3982917	3983068	9.89	7.48	7.85	14.37	20.25	14.72	9.87	8.40	7.84	8.21	7.41	atac_wt_pe
chrI	3986576	3986727	2.85	5.06	3.82	4.52	5.08	6.00	3.70	4.14	3.73	4.85	5.42	atac_wt_pe
chrI	3987222	3987373	3.21	3.31	1.91	4.05	2.97	3.11	3.44	3.68	3.29	3.91	4.36	atac_wt_pe
chrI	3987780	3987931	14.34	9.84	11.58	10.71	11.01	8.07	10.41	11.13	8.26	9.46	12.02	atac_wt_pe
chrI	3988317	3988468	2.69	3.69	3.78	3.94	2.84	3.52	4.72	4.61	3.15	3.22	3.24	atac_glp1_se
chrI	3988740	3988891	6.80	7.74	8.88	6.35	5.62	4.98	8.14	7.49	5.92	6.44	7.21	atac_wt_pe
chrI	3989488	3989639	1.00	1.85	1.61	1.31	1.35	2.33	4.33	2.45	3.46	4.26	4.75	atac_glp1_se
chrI	3990974	3991125	3.22	1.75	1.76	1.72	3.26	3.59	5.38	4.54	5.79	6.29	5.87	atac_wt_pe
chrI	3991206	3991357	1.77	1.81	2.22	2.12	5.03	5.93	11.33	8.12	12.57	13.18	12.77	atac_wt_pe
chrI	3992431	3992582	5.08	6.38	7.60	7.90	9.78	10.77	22.43	17.88	26.16	23.09	22.35	atac_wt_pe
chrI	3992730	3992881	7.89	2.23	2.74	2.08	2.22	3.62	3.15	3.20	2.91	3.24	3.33	atac_wt_pe
chrI	3993620	3993771	28.92	6.36	7.05	5.22	4.46	3.99	4.59	3.97	3.73	4.56	5.76	atac_wt_pe
chrI	3994563	3994714	65.37	24.54	31.44	29.73	29.41	29.53	46.49	39.58	33.51	28.97	28.67	atac_wt_pe
chrI	3996983	3997134	0.70	1.18	0.45	1.55	1.43	6.56	3.53	1.92	2.59	2.29	3.35	atac_wt_pe
chrI	4001894	4002045	8.15	3.79	5.27	3.52	3.72	3.22	3.04	2.62	2.67	2.81	3.27	atac_wt_pe
chrI	4004805	4004956	2.07	3.38	3.85	2.48	2.14	1.53	1.83	1.92	2.16	3.16	3.19	atac_glp1_se
chrI	4005443	4005594	14.06	21.67	47.65	20.17	15.90	10.41	21.79	24.77	19.87	24.27	27.13	atac_wt_pe
chrI	4005708	4005859	23.63	33.44	72.04	34.64	28.87	16.83	36.47	42.63	34.32	42.81	45.61	atac_wt_pe
chrI	4006416	4006567	4.01	8.14	9.15	5.10	5.70	3.31	4.28	4.08	3.94	4.44	6.44	atac_wt_pe
chrI	4007180	4007331	2.22	5.08	7.51	3.83	3.10	2.55	2.50	3.24	2.63	3.36	4.27	atac_wt_se
chrI	4007417	4007568	1.65	4.23	5.76	3.17	2.78	1.92	2.21	1.87	2.10	2.54	2.60	atac_wt_se
chrI	4008260	4008411	4.80	10.57	17.56	14.81	16.55	13.52	31.43	29.32	28.38	25.87	24.51	atac_wt_pe
chrI	4008776	4008927	5.98	12.71	12.64	5.89	6.78	7.28	10.70	11.97	11.10	10.46	11.39	atac_wt_pe
chrI	4009681	4009832	2.06	3.22	4.11	3.38	6.19	4.27	4.49	4.73	4.76	6.28	7.24	atac_wt_pe
chrI	4009968	4010119	2.38	2.89	2.91	2.27	4.04	2.35	2.28	2.95	2.76	2.74	2.86	atac_wt_se
chrI	4011407	4011558	1.75	2.57	2.38	2.64	2.66	2.02	2.76	3.43	2.58	2.33	2.36	atac_glp1_se
chrI	4012292	4012443	1.78	6.99	4.66	5.67	6.70	3.86	5.95	7.01	4.99	6.43	6.42	atac_wt_pe
chrI	4012913	4013064	3.69	11.88	13.33	8.99	13.44	7.57	13.76	15.54	11.40	12.22	12.56	atac_wt_pe
chrI	4013779	4013930	2.27	3.93	3.73	3.12	3.84	4.00	4.46	5.03	4.18	4.63	3.89	atac_glp1_se
chrI	4017510	4017661	1.84	4.00	4.36	2.69	3.35	2.78	2.64	3.18	2.53	3.12	3.87	atac_glp1_se
chrI	4017891	4018042	1.91	3.26	3.41	2.23	2.89	2.69	3.35	2.87	1.70	2.40	3.06	atac_glp1_se
chrI	4018509	4018660	3.24	6.38	7.08	5.11	3.88	3.02	2.84	3.05	2.27	2.72	3.41	atac_wt_pe
chrI	4019818	4019969	1.85	3.84	3.40	3.31	2.21	1.76	1.89	2.17	1.51	2.02	1.98	atac_wt_se
chrI	4020633	4020784	11.95	15.48	20.80	13.41	12.80	7.95	12.93	15.48	11.62	12.33	12.82	atac_wt_pe
chrI	4021097	4021248	7.71	11.04	15.06	7.60	6.40	4.34	5.16	5.20	3.95	4.01	5.82	atac_wt_pe
chrI	4029399	4029550	26.64	26.02	28.20	29.70	23.35	14.96	39.73	34.88	29.47	30.71	27.63	atac_wt_pe
chrI	4030056	4030207	0.53	1.18	0.49	0.89	1.03	0.91	1.37	1.34	2.67	2.66	2.24	atac_glp1_se
chrI	4030633	4030784	13.24	15.48	13.35	17.77	13.89	8.31	22.31	15.29	14.01	16.46	17.95	atac_wt_pe
chrI	4032567	4032718	149.95	55.10	63.76	70.07	61.78	33.49	65.77	64.54	53.23	55.75	54.35	atac_wt_pe
chrI	4033514	4033665	9.17	3.04	1.87	1.85	1.96	1.89	1.50	1.62	1.36	1.40	2.03	atac_wt_pe
chrI	4034072	4034223	3.67	2.30	2.22	1.90	1.49	2.68	1.17	1.72	1.20	1.80	2.12	atac_wt_pe
chrI	4035466	4035617	26.85	28.34	42.46	23.33	21.40	12.96	21.30	24.15	16.19	21.53	26.56	atac_wt_pe
chrI	4036989	4037140	2.37	2.18	3.47	3.01	3.21	2.72	2.80	3.41	2.24	3.15	3.41	atac_wt_se
chrI	4037800	4037951	2.94	3.65	4.41	2.96	3.15	2.26	3.31	3.02	2.60	2.65	3.20	atac_wt_pe
chrI	4040684	4040835	1.06	2.43	1.80	1.65	1.71	2.02	1.95	1.82	1.87	1.98	2.39	atac_wt_pe
chrI	4041020	4041171	4.00	1.78	1.69	1.60	1.46	1.86	0.83	1.04	0.98	0.84	1.12	atac_wt_pe
chrI	4046756	4046907	54.13	37.11	54.74	38.29	29.74	16.45	32.98	32.27	21.44	22.80	26.06	atac_wt_pe
chrI	4050629	4050780	10.81	14.50	18.89	9.97	9.46	5.74	10.98	9.58	8.22	8.17	10.19	atac_wt_pe
chrI	4051444	4051595	0.97	3.83	2.41	1.59	1.97	1.53	1.27	1.82	1.11	1.60	1.89	atac_wt_pe
chrI	4072812	4072963	1.66	1.92	1.79	2.73	3.13	2.54	4.52	4.69	3.40	2.53	1.69	atac_glp1_se
chrI	4073677	4073828	1.39	2.41	2.42	4.98	5.33	4.21	9.47	8.99	7.16	6.45	4.50	atac_wt_pe
chrI	4074971	4075122	1.78	2.02	2.38	1.68	3.51	1.88	1.51	1.84	2.18	2.36	3.22	atac_wt_pe
chrI	4081304	4081455	7.77	12.52	20.27	16.78	19.00	9.90	16.58	14.11	13.65	15.92	20.37	atac_wt_pe
chrI	4091795	4091946	1.41	1.76	1.57	2.18	3.86	2.85	5.79	5.14	6.11	3.88	2.90	atac_wt_pe
chrI	4094038	4094189	2.68	2.20	2.43	1.40	1.77	4.68	9.19	10.31	12.91	9.78	8.08	atac_wt_pe
chrI	4099629	4099780	1.42	3.08	1.84	4.21	4.82	2.69	7.22	9.74	9.40	8.51	5.93	atac_wt_pe
chrI	4099988	4100139	1.16	1.84	1.05	2.14	1.62	1.21	2.82	3.89	4.39	4.14	2.92	atac_glp1_se
chrI	4108732	4108883	3.47	2.32	2.28	1.61	2.55	1.60	3.16	2.55	1.78	2.74	2.36	atac_wt_pe
chrI	4114573	4114724	0.48	1.00	0.52	1.34	2.78	5.39	0.21	0.40	0.18	0.37	0.39	atac_wt_pe
chrI	4116474	4116625	0.35	0.50	0.33	0.46	0.85	2.49	0.23	0.20	0.30	0.29	0.23	atac_wt_se
chrI	4125947	4126098	6.51	4.01	6.22	3.16	3.12	2.61	2.20	3.05	4.18	3.67	3.55	atac_wt_pe
chrI	4132242	4132393	11.14	13.34	11.62	22.79	24.19	26.81	18.20	16.38	14.37	15.35	15.10	atac_wt_pe
chrI	4136897	4137048	5.35	3.31	3.27	3.23	3.30	3.88	2.96	2.33	2.78	2.20	2.38	atac_wt_pe
chrI	4137477	4137628	2.57	1.90	2.04	2.12	2.70	3.90	4.67	3.98	3.65	3.49	3.34	atac_glp1_se
chrI	4138761	4138912	3.21	2.94	2.93	3.06	4.63	3.96	3.07	3.80	3.06	3.33	2.95	atac_wt_pe
chrI	4139112	4139263	15.87	8.07	11.76	9.58	11.38	11.11	12.58	15.87	16.23	15.77	14.66	atac_wt_se
chrI	4139388	4139539	36.30	26.81	28.17	33.44	37.68	33.82	33.51	38.24	40.58	41.82	35.03	atac_wt_pe
chrI	4139751	4139902	1.18	3.52	2.14	3.00	3.74	4.61	2.73	1.81	2.58	2.29	3.02	atac_wt_pe
chrI	4140350	4140501	8.14	8.97	9.24	14.25	17.94	13.32	28.63	21.49	18.46	15.37	13.94	atac_wt_pe
chrI	4140761	4140912	10.22	5.86	7.76	14.22	18.90	11.06	24.54	20.68	14.00	11.88	9.99	atac_wt_pe
chrI	4145056	4145207	0.20	0.45	0.32	0.66	1.41	1.23	1.76	1.09	0.77	0.63	0.48	atac_wt_pe
chrI	4145211	4145362	0.23	0.97	0.74	0.75	1.89	3.57	6.80	3.39	2.05	1.10	0.61	atac_wt_pe
chrI	4147106	4147257	0.40	1.49	0.79	1.53	1.82	3.07	6.74	5.75	5.19	5.08	3.27	atac_wt_pe
chrI	4149345	4149496	4.40	1.69	1.91	5.64	5.04	1.49	0.68	1.02	0.64	0.65	0.57	atac_wt_pe
chrI	4149761	4149912	5.68	1.51	2.29	7.87	4.98	1.14	1.20	0.96	1.09	0.85	0.60	atac_wt_pe
chrI	4153335	4153486	2.05	1.65	1.69	4.59	4.57	0.79	1.22	0.81	0.55	0.47	0.83	atac_wt_pe
chrI	4154446	4154597	2.21	1.05	3.27	4.99	2.53	1.20	0.77	0.91	0.60	0.81	0.77	atac_wt_pe
chrI	4155690	4155841	2.05	1.86	2.42	3.32	2.85	2.57	6.73	4.02	1.80	1.35	0.98	atac_wt_pe
chrI	4157262	4157413	2.44	1.83	3.76	4.65	3.54	2.13	2.59	1.49	0.86	0.93	1.01	atac_wt_se
chrI	4157602	4157753	1.32	1.42	1.57	2.08	2.82	1.39	1.23	0.81	0.47	0.68	0.55	atac_wt_pe
chrI	4158167	4158318	2.79	3.46	5.14	5.86	5.92	6.81	15.94	7.95	4.27	4.27	3.04	atac_wt_pe
chrI	4158701	4158852	2.39	1.76	1.24	1.44	1.33	1.43	0.74	0.63	0.91	0.96	0.96	atac_wt_pe
chrI	4161186	4161337	2.66	4.54	8.45	9.77	13.36	11.86	25.94	19.08	23.26	22.02	15.92	atac_wt_pe
chrI	4161914	4162065	1.48	2.64	2.45	1.68	4.52	1.67	4.14	2.29	2.64	3.42	3.72	atac_wt_pe
chrI	4171402	4171553	1.85	3.51	2.08	2.96	4.01	6.17	1.17	2.06	1.63	2.10	1.35	atac_wt_se
chrI	4172085	4172236	223.96	149.88	194.81	248.46	201.45	230.18	179.72	152.72	189.62	177.68	194.10	atac_wt_pe
chrI	4173048	4173199	1.96	2.90	2.59	4.16	4.31	4.84	3.38	3.93	4.64	4.47	3.31	atac_glp1_se
chrI	4173833	4173984	1.91	3.09	3.11	11.59	10.65	11.12	27.29	30.63	31.10	25.66	15.99	atac_wt_pe
chrI	4174320	4174471	1.27	3.08	1.36	3.32	4.38	5.45	10.99	14.20	17.63	14.69	14.12	atac_wt_pe
chrI	4174655	4174806	1.29	2.40	1.90	3.14	4.59	8.05	7.31	7.93	7.33	5.01	3.67	atac_wt_pe
chrI	4174995	4175146	7.17	11.98	6.55	11.32	16.47	18.65	14.85	11.34	11.30	13.30	13.82	atac_wt_pe
chrI	4175885	4176036	19.21	24.32	21.07	31.13	24.46	16.59	27.90	23.27	26.97	28.93	36.92	atac_wt_pe
chrI	4177492	4177643	2.80	3.68	2.62	4.20	4.14	4.42	2.50	3.77	4.48	3.46	3.16	atac_wt_se
chrI	4177756	4177907	2.68	3.32	2.17	4.17	4.88	3.57	2.06	2.19	2.91	2.71	2.83	atac_wt_pe
chrI	4178549	4178700	26.65	28.32	24.33	39.34	32.70	32.99	67.32	65.57	70.77	69.13	59.99	atac_wt_pe
chrI	4181855	4182006	2.09	1.80	1.44	1.70	2.52	3.50	4.02	3.75	3.99	3.91	3.65	atac_wt_se
chrI	4182201	4182352	0.88	1.60	1.39	2.02	1.68	2.60	3.80	4.95	5.87	3.86	3.56	atac_glp1_se
chrI	4184568	4184719	2.80	2.97	2.72	3.01	4.13	4.74	2.32	3.38	2.97	3.35	3.00	atac_wt_pe
chrI	4185332	4185483	1.93	3.18	2.25	3.71	7.57	11.39	18.50	16.49	14.09	15.08	11.37	atac_wt_pe
chrI	4185664	4185815	0.85	1.90	1.50	3.32	6.75	12.55	2.53	2.60	2.35	2.41	2.31	atac_wt_pe
chrI	4185947	4186098	1.17	1.48	1.62	6.48	12.39	21.67	1.40	0.99	1.12	1.49	1.26	atac_wt_pe
chrI	4186367	4186518	1.49	3.50	3.17	5.92	9.32	8.30	16.57	8.84	10.15	10.92	10.14	atac_wt_pe
chrI	4187199	4187350	0.59	1.24	1.02	1.38	2.41	2.12	2.69	3.29	3.60	3.85	3.38	atac_wt_pe
chrI	4187467	4187618	1.03	1.88	1.10	1.52	2.34	3.10	1.15	1.43	1.47	1.43	1.46	atac_wt_se
chrI	4188259	4188410	0.56	0.99	0.65	0.82	1.02	1.42	0.74	0.62	0.79	0.79	0.60	atac_wt_pe
chrI	4198677	4198828	20.17	3.49	3.26	2.96	2.17	4.25	1.09	1.35	1.15	1.25	1.63	atac_wt_pe
chrI	4198990	4199141	10.69	2.15	1.87	1.79	2.04	2.15	0.80	1.31	1.75	2.56	3.74	atac_wt_pe
chrI	4199357	4199508	5.53	2.40	2.70	2.88	2.49	2.06	3.33	2.71	1.64	2.16	2.29	atac_glp1_se
chrI	4199741	4199892	8.40	4.49	9.20	6.96	6.98	4.23	6.97	5.34	4.65	5.09	6.78	atac_wt_pe
chrI	4200057	4200208	25.54	11.54	20.08	13.34	13.41	5.48	8.07	7.77	5.75	8.44	10.97	atac_wt_pe
chrI	4200713	4200864	4.55	2.42	2.14	2.20	2.33	1.55	1.15	1.11	1.05	1.23	2.00	atac_wt_pe
chrI	4201060	4201211	2.09	2.53	1.68	2.19	4.21	2.14	2.25	1.99	3.10	4.12	6.61	atac_wt_pe
chrI	4201628	4201779	11.38	13.10	10.31	8.03	3.94	4.02	3.04	3.44	3.45	3.81	5.63	atac_wt_pe
chrI	4202290	4202441	3.23	3.35	3.01	2.83	2.57	1.82	1.82	1.69	1.31	1.41	2.08	atac_wt_pe
chrI	4202770	4202921	1.24	1.29	1.72	2.31	2.60	2.68	4.58	2.47	1.73	2.21	2.25	atac_wt_pe
chrI	4210391	4210542	0.50	0.91	0.43	2.07	5.26	9.30	0.45	0.46	0.54	0.59	0.56	atac_wt_pe
chrI	4210753	4210904	7.29	4.90	4.35	4.17	5.46	5.87	7.64	6.08	6.43	6.90	6.70	atac_wt_pe
chrI	4215728	4215879	7.52	7.18	4.66	10.01	9.20	10.02	11.71	9.66	9.81	11.45	9.68	atac_wt_pe
chrI	4215989	4216140	4.71	3.48	3.75	4.69	5.20	5.93	2.16	2.82	2.81	3.38	4.36	atac_wt_se
chrI	4216483	4216634	2.39	2.84	1.47	2.71	3.34	2.68	2.85	2.20	1.96	1.97	2.07	atac_wt_pe
chrI	4217285	4217436	3.73	2.08	2.67	1.89	2.23	1.63	1.46	1.45	1.31	1.73	1.81	atac_wt_se
chrI	4218436	4218587	12.17	7.70	11.74	7.52	4.51	3.20	6.02	6.41	5.56	8.91	8.63	atac_wt_pe
chrI	4218691	4218842	8.07	6.85	7.02	6.17	4.81	2.47	3.92	4.60	3.80	4.92	5.14	atac_wt_pe
chrI	4219751	4219902	7.38	2.81	3.15	2.93	7.09	2.19	2.17	3.04	2.32	2.50	1.99	atac_wt_pe
chrI	4223143	4223294	9.07	3.86	7.24	4.83	4.28	2.46	2.42	2.51	2.65	3.40	4.64	atac_wt_pe
chrI	4224891	4225042	61.50	25.21	32.08	28.47	19.91	9.59	18.76	19.27	15.90	20.02	24.05	atac_wt_pe
chrI	4225848	4225999	0.66	1.82	1.05	1.10	1.40	1.16	0.82	1.24	1.57	2.89	3.64	atac_glp1_se
chrI	4227614	4227765	6.53	2.30	2.29	2.52	3.71	2.04	1.58	1.66	1.85	2.05	2.58	atac_wt_pe
chrI	4229602	4229753	10.88	3.08	2.40	2.69	2.69	2.09	1.60	1.74	1.56	1.43	1.63	atac_wt_pe
chrI	4242492	4242643	4.43	2.14	2.30	3.58	3.18	2.28	5.90	4.30	4.13	5.40	5.24	atac_wt_pe
chrI	4247532	4247683	8.85	7.96	5.43	11.10	10.59	12.85	13.96	14.13	12.44	14.43	11.22	atac_wt_pe
chrI	4254040	4254191	78.68	89.24	158.07	87.85	69.05	53.68	106.03	111.41	83.75	93.68	95.35	atac_wt_pe
chrI	4254747	4254898	1.49	1.75	1.51	3.87	6.40	9.97	6.49	5.76	5.39	5.24	4.18	atac_wt_pe
chrI	4255389	4255540	6.68	2.53	1.56	1.98	2.29	2.47	0.96	1.44	1.24	1.50	1.45	atac_wt_pe
chrI	4265950	4266101	1.92	2.05	1.73	2.41	2.27	2.42	1.72	1.83	2.29	2.05	2.06	atac_wt_pe
chrI	4270484	4270635	6.98	5.23	3.32	6.83	6.55	7.36	7.19	5.83	6.26	8.21	8.62	atac_wt_pe
chrI	4298073	4298224	170.16	131.73	245.46	142.18	110.36	87.13	145.10	146.40	148.55	157.32	149.53	atac_wt_pe
chrI	4299155	4299306	1.39	6.23	6.38	7.16	8.07	8.74	10.27	10.10	11.59	11.51	12.63	atac_wt_pe
chrI	4299581	4299732	25.00	14.57	15.36	15.31	10.55	11.79	20.39	20.95	22.28	21.57	21.96	atac_wt_pe
chrI	4302326	4302477	2.61	5.63	3.94	4.78	6.66	8.40	7.95	5.13	6.18	6.96	6.56	atac_wt_pe
chrI	4302843	4302994	0.91	1.89	1.00	2.14	2.67	2.16	1.82	2.20	2.50	2.57	1.80	atac_wt_pe
chrI	4303267	4303418	1.26	1.28	0.76	2.51	2.86	1.26	0.59	0.81	1.22	1.22	1.09	atac_wt_se
chrI	4303927	4304078	12.99	7.80	10.58	17.07	18.87	5.63	8.98	8.99	11.17	10.25	7.74	atac_wt_pe
chrI	4305672	4305823	1.91	3.47	2.51	2.38	3.85	2.99	2.47	4.39	4.16	3.57	4.90	atac_glp1_se
chrI	4306594	4306745	1.49	1.85	1.86	3.40	3.24	2.01	1.08	1.50	1.12	1.57	1.34	atac_wt_pe
chrI	4308292	4308443	10.47	4.54	4.50	4.22	5.00	3.47	3.54	3.26	2.55	3.02	3.55	atac_wt_pe
chrI	4309790	4309941	4.26	2.53	2.86	2.48	2.65	2.79	0.98	1.20	1.05	1.17	1.55	atac_wt_se
chrI	4311691	4311842	20.93	30.81	36.92	29.13	26.77	20.91	44.64	38.63	35.74	38.56	36.99	atac_wt_pe
chrI	4312773	4312924	30.23	9.88	9.36	8.72	5.74	4.95	6.39	7.32	6.99	10.18	11.04	atac_wt_pe
chrI	4313682	4313833	1.45	2.00	2.24	2.12	3.07	4.92	11.14	6.39	9.28	9.67	9.08	atac_wt_pe
chrI	4314433	4314584	1.69	3.15	4.48	4.78	7.81	7.11	11.64	10.19	10.60	10.44	8.51	atac_wt_pe
chrI	4315099	4315250	1.57	1.43	1.91	2.43	3.86	2.66	2.51	2.15	2.44	2.68	2.95	atac_wt_pe
chrI	4315485	4315636	1.04	2.61	2.23	2.24	3.38	3.06	2.94	2.40	2.45	2.03	2.26	atac_wt_pe
chrI	4316403	4316554	4.27	3.76	5.65	5.87	8.22	4.59	7.33	5.69	4.44	5.29	6.07	atac_wt_pe
chrI	4317183	4317334	1.47	1.95	3.00	3.32	3.45	2.87	5.53	3.79	3.59	4.05	4.20	atac_wt_pe
chrI	4318841	4318992	0.71	1.20	0.86	0.70	1.85	1.62	1.60	1.69	1.83	1.83	3.13	atac_glp1_se
chrI	4320786	4320937	51.64	36.52	52.15	32.12	33.29	24.35	41.06	30.80	27.61	28.04	26.84	atac_wt_pe
chrI	4321450	4321601	2.70	2.43	1.80	2.41	2.34	1.53	1.15	0.88	1.00	1.09	1.15	atac_wt_se
chrI	4322461	4322612	4.23	3.21	3.04	4.40	7.84	3.92	6.51	3.91	3.41	3.59	3.46	atac_wt_pe
chrI	4322753	4322904	18.57	8.57	4.62	10.25	11.45	3.96	5.68	3.78	3.34	3.25	4.15	atac_wt_pe
chrI	4323904	4324055	1.27	2.05	2.25	2.81	3.25	2.59	4.56	2.17	1.49	1.17	1.50	atac_wt_pe
chrI	4324137	4324288	1.73	4.36	3.83	4.84	4.47	2.52	3.40	3.11	1.79	1.73	2.44	atac_wt_pe
chrI	4327957	4328108	1.13	2.91	6.39	4.22	4.54	9.22	14.19	15.02	15.44	15.68	14.40	atac_wt_pe
chrI	4328173	4328324	0.91	3.63	8.62	6.13	7.53	9.21	21.67	21.45	26.07	22.60	19.63	atac_wt_pe
chrI	4328966	4329117	2.47	6.05	8.54	8.65	9.75	11.82	19.93	15.94	15.79	13.65	11.89	atac_wt_pe
chrI	4329384	4329535	2.75	6.05	10.71	8.13	7.81	8.35	13.52	14.88	14.97	14.92	17.27	atac_wt_pe
chrI	4330599	4330750	21.26	26.97	42.28	33.80	37.66	25.91	48.89	47.98	40.21	40.12	35.36	atac_wt_pe
chrI	4332273	4332424	3.14	4.89	9.25	9.07	11.05	11.67	20.35	12.66	9.99	11.13	9.67	atac_wt_pe
chrI	4333913	4334064	4.44	8.81	16.17	13.60	14.11	13.62	24.48	19.46	18.49	22.63	21.72	atac_wt_pe
chrI	4334461	4334612	3.41	5.24	9.52	10.89	15.31	14.37	25.74	20.95	21.68	24.66	20.64	atac_wt_pe
chrI	4367896	4368047	6.04	6.06	4.60	5.40	6.33	8.53	7.42	5.82	4.58	5.37	5.79	atac_wt_pe
chrI	4370999	4371150	7.03	2.40	2.67	2.45	2.63	3.30	1.49	1.96	1.14	1.15	1.52	atac_wt_pe
chrI	4373103	4373254	2.61	3.80	1.70	3.31	5.00	6.94	5.16	3.29	4.53	5.47	5.67	atac_wt_pe
chrI	4373381	4373532	1.87	2.28	2.19	2.90	5.25	6.11	6.17	5.16	5.76	5.70	5.20	atac_wt_se
chrI	4374295	4374446	2.19	2.23	2.50	3.08	2.99	2.08	1.91	2.13	1.13	1.32	1.75	atac_wt_pe
chrI	4375083	4375234	2.09	1.82	1.24	2.19	4.94	4.15	1.41	1.47	1.32	1.31	1.97	atac_wt_se
chrI	4375213	4375364	1.88	1.67	1.17	1.94	4.62	4.08	1.35	1.25	1.08	1.15	1.83	atac_wt_pe
chrI	4375476	4375627	4.52	3.42	2.47	4.10	3.96	9.21	3.32	2.42	1.86	2.71	3.47	atac_wt_pe
chrI	4381786	4381937	22.29	13.84	8.50	19.29	17.85	19.02	17.04	15.13	14.76	19.16	17.03	atac_wt_pe
chrI	4382097	4382248	4.95	4.98	3.79	9.23	18.07	25.48	10.36	11.51	8.30	8.23	7.22	atac_wt_pe
chrI	4382273	4382424	2.77	8.23	3.17	8.93	10.21	13.33	25.56	26.50	21.40	20.14	17.75	atac_wt_pe
chrI	4385763	4385914	0.95	1.32	0.84	2.95	6.65	12.15	0.76	0.86	0.75	1.02	0.97	atac_wt_pe
chrI	4385986	4386137	1.35	1.66	1.12	1.72	2.95	6.49	1.37	1.29	1.03	0.98	1.08	atac_wt_pe
chrI	4386503	4386654	11.25	18.72	20.12	26.51	26.28	19.99	34.44	29.99	33.41	36.38	41.21	atac_wt_pe
chrI	4389341	4389492	1.66	1.50	1.07	2.56	3.42	8.49	0.60	0.41	0.53	0.63	0.64	atac_wt_pe
chrI	4404697	4404848	8.18	7.38	6.87	5.45	2.66	1.57	2.36	2.53	2.19	3.85	3.34	atac_wt_pe
chrI	4407217	4407368	5.08	2.86	3.76	1.79	1.59	1.74	0.70	1.09	1.34	1.23	1.33	atac_wt_pe
chrI	4419133	4419284	1.87	2.47	2.20	2.13	2.78	2.12	2.68	2.67	2.37	2.58	2.90	atac_wt_pe
chrI	4420891	4421042	7.44	2.97	3.77	2.81	4.76	1.81	1.29	1.81	1.17	1.34	1.69	atac_wt_pe
chrI	4423036	4423187	3.17	2.25	2.64	1.94	1.45	1.74	1.25	1.76	1.87	1.49	1.25	atac_wt_se
chrI	4431974	4432125	5.88	4.96	7.55	6.61	6.52	4.04	5.77	5.71	4.21	4.19	4.83	atac_wt_pe
chrI	4432608	4432759	1.31	1.77	1.28	1.57	1.46	1.26	1.11	2.16	2.82	3.73	5.46	atac_glp1_se
chrI	4433141	4433292	5.21	6.09	6.63	6.94	8.17	6.00	11.89	11.92	11.52	14.63	19.10	atac_wt_pe
chrI	4433375	4433526	3.23	3.86	4.15	4.72	5.09	5.14	12.37	8.25	9.19	11.14	13.02	atac_wt_pe
chrI	4434053	4434204	3.94	5.11	4.72	5.54	4.44	2.77	4.20	3.66	3.22	3.55	3.85	atac_wt_pe
chrI	4434735	4434886	0.86	1.90	2.04	2.55	4.84	5.51	14.65	8.86	10.84	9.96	6.15	atac_wt_pe
chrI	4435059	4435210	2.00	2.09	2.39	2.92	4.53	4.03	7.68	6.72	8.09	6.99	4.83	atac_wt_pe
chrI	4436788	4436939	8.00	8.59	14.82	14.49	13.06	10.05	23.51	18.90	14.52	14.12	12.62	atac_wt_pe
chrI	4437993	4438144	2.01	2.29	4.41	5.49	4.95	4.24	11.75	9.26	9.32	8.10	6.08	atac_wt_pe
chrI	4439060	4439211	1.12	1.99	2.97	3.40	4.99	4.34	12.07	9.32	7.60	5.46	3.52	atac_wt_pe
chrI	4440276	4440427	2.61	2.00	4.29	4.67	9.17	8.84	8.88	7.79	11.13	10.08	8.93	atac_wt_pe
chrI	4444406	4444557	10.93	10.06	7.00	14.05	16.08	16.26	15.96	13.30	13.42	15.78	12.24	atac_wt_pe
chrI	4446776	4446927	1.66	1.72	1.22	1.53	1.48	2.07	1.22	9.76	12.97	5.89	1.83	atac_glp1_se
chrI	4447403	4447554	0.97	1.07	0.73	1.01	1.25	1.48	0.91	7.53	13.12	5.93	1.64	atac_glp1_se
chrI	4448154	4448305	1.19	1.22	1.06	1.14	1.38	1.79	0.84	9.89	14.86	6.78	1.74	atac_glp1_se
chrI	4448773	4448924	1.21	1.50	1.35	1.45	1.46	2.10	1.68	13.57	19.51	9.33	2.42	atac_glp1_se
chrI	4449116	4449267	1.03	1.73	1.38	1.43	1.38	1.86	1.43	10.74	15.43	8.22	2.42	atac_glp1_se
chrI	4449974	4450125	1.16	1.42	1.14	0.95	1.45	2.13	1.89	12.78	17.83	7.74	2.57	atac_glp1_se
chrI	4450304	4450455	1.45	1.39	1.27	1.37	1.37	2.33	1.85	14.64	18.54	9.08	2.37	atac_glp1_se
chrI	4450697	4450848	0.84	1.20	0.58	0.73	1.17	1.96	1.27	8.27	10.38	6.23	1.70	atac_glp1_se
chrI	4451058	4451209	5.94	3.12	2.03	3.87	4.68	5.56	5.18	12.83	16.09	9.06	5.17	atac_wt_pe
chrI	4451542	4451693	1.11	1.24	0.84	1.00	1.15	1.82	2.14	10.50	13.64	6.03	1.97	atac_glp1_se
chrI	4452487	4452638	1.11	0.94	0.97	1.14	0.88	1.68	4.29	13.78	14.79	6.59	1.78	atac_glp1_se
chrI	4453425	4453576	1.11	0.93	0.81	0.79	0.83	1.35	5.76	13.38	15.03	7.15	2.24	atac_glp1_se
chrI	4454636	4454787	0.98	1.19	0.90	0.93	1.20	1.34	7.49	11.23	12.94	6.56	1.98	atac_glp1_se
chrI	4455011	4455162	0.69	1.03	0.62	0.82	0.84	1.01	8.30	11.20	10.91	4.75	1.81	atac_glp1_se
chrI	4455274	4455425	0.79	0.70	1.13	0.68	0.85	1.26	9.55	12.27	10.22	5.65	1.50	atac_glp1_se
chrI	4455957	4456108	1.54	1.54	1.28	1.37	1.80	2.18	21.00	18.35	18.20	8.40	2.98	atac_glp1_se
chrI	4456221	4456372	1.39	1.34	1.06	0.98	1.55	2.67	19.41	17.85	15.04	8.45	2.24	atac_glp1_se
chrI	4456875	4457026	0.16	1.12	0.03	1.21	1.15	3.45	10.08	4.31	8.08	7.61	7.12	atac_wt_pe
chrI	4457289	4457440	0.74	1.51	0.84	1.22	2.35	4.75	15.17	10.48	12.62	7.12	3.15	atac_wt_pe
chrI	4457720	4457871	0.86	1.21	0.99	0.70	1.66	4.05	21.12	15.20	14.94	7.24	2.74	atac_glp1_se
chrI	4458331	4458482	0.64	0.81	0.70	0.86	1.38	3.02	16.73	12.11	13.19	7.02	2.34	atac_glp1_se
chrI	4459089	4459240	0.43	0.91	0.53	0.58	0.69	1.94	12.98	9.28	10.65	4.99	1.70	atac_glp1_se
chrI	4459706	4459857	0.13	0.56	0.12	0.88	0.67	1.69	5.62	3.80	4.21	3.30	3.49	atac_wt_pe
chrI	4460075	4460226	3.29	2.69	3.19	2.17	3.99	4.16	19.86	19.33	16.98	9.10	4.59	atac_wt_pe
chrI	4461517	4461668	2.20	2.14	1.87	1.88	2.73	3.09	14.38	24.07	20.49	8.18	1.92	atac_glp1_se
chrI	4461856	4462007	2.41	1.73	1.67	2.01	1.84	2.38	9.79	18.62	16.93	5.67	1.70	atac_glp1_se
chrI	4462132	4462283	2.38	1.97	2.21	1.68	2.06	2.43	8.55	20.15	17.23	5.86	1.98	atac_glp1_se
chrI	4462507	4462658	1.71	1.80	1.83	1.59	2.21	1.97	6.59	17.77	14.95	5.74	1.47	atac_glp1_se
chrI	4463163	4463314	0.78	0.72	0.71	0.77	0.96	1.34	2.00	6.68	8.88	3.18	0.83	atac_glp1_se
chrI	4463451	4463602	1.01	1.00	0.89	0.61	0.98	1.09	2.01	6.74	7.98	3.23	1.01	atac_glp1_se
chrI	4463760	4463911	1.16	0.83	0.88	0.96	0.85	0.97	1.59	6.01	7.40	2.75	0.66	atac_glp1_se
chrI	4464182	4464333	1.67	1.39	1.07	1.32	1.93	2.34	2.53	10.71	13.84	4.59	1.36	atac_glp1_se
chrI	4464667	4464818	2.16	1.75	1.94	2.25	2.53	2.95	2.59	13.19	15.87	5.69	1.18	atac_glp1_se
chrI	4464949	4465100	2.32	1.65	2.00	1.92	2.09	2.66	2.13	10.54	14.89	5.77	1.26	atac_glp1_se
chrI	4465260	4465411	2.40	2.30	1.82	3.19	2.71	2.86	3.10	10.33	14.23	5.72	1.89	atac_wt_se
chrI	4465793	4465944	1.16	1.23	1.21	1.09	1.37	1.96	1.52	6.13	11.46	4.31	1.01	atac_glp1_se
chrI	4466503	4466654	1.23	1.31	0.99	1.45	1.48	2.13	1.23	5.54	10.06	4.09	1.49	atac_glp1_se
chrI	4466944	4467095	7.65	7.87	6.67	14.46	9.70	12.65	8.84	14.89	23.10	15.83	9.48	atac_wt_pe
chrI	4467822	4467973	2.04	2.14	2.08	1.96	1.63	1.81	1.24	5.86	14.19	8.22	2.57	atac_glp1_se
chrI	4468444	4468595	0.81	1.27	0.88	0.87	0.87	1.50	0.50	4.00	13.50	6.61	1.55	atac_glp1_se
chrI	4469194	4469345	0.94	1.36	0.81	0.92	1.15	1.43	0.80	3.34	11.14	6.52	1.58	atac_glp1_se
chrI	4469687	4469838	1.42	1.68	1.65	1.48	1.20	1.99	0.84	4.72	15.92	8.87	2.33	atac_glp1_se
chrI	4470057	4470208	0.69	1.07	0.82	0.68	0.69	1.16	0.70	2.54	9.58	5.92	2.08	atac_glp1_se
chrI	4470372	4470523	0.34	0.76	0.39	0.51	0.56	0.99	0.65	1.51	7.81	5.26	4.29	atac_glp1_se
chrI	4470666	4470817	0.35	0.97	0.70	0.75	0.62	0.87	0.57	1.38	8.44	5.37	2.08	atac_glp1_se
chrI	4471003	4471154	0.76	1.09	1.06	0.68	0.83	0.93	0.50	2.17	8.32	5.25	2.03	atac_glp1_se
chrI	4471809	4471960	2.71	2.46	2.73	1.41	2.93	2.36	2.03	4.89	13.10	8.97	5.89	atac_wt_pe
chrI	4472755	4472906	0.64	0.83	0.72	0.57	0.79	0.64	0.60	1.48	6.00	4.64	1.66	atac_glp1_se
chrI	4473180	4473331	0.44	0.53	0.57	0.53	0.51	0.59	0.42	1.24	5.85	3.59	1.67	atac_glp1_se
chrI	4473699	4473850	1.09	1.32	1.39	0.86	1.01	1.16	1.88	2.59	10.09	6.91	3.98	atac_glp1_se
chrI	4474215	4474366	1.81	2.38	1.95	1.61	1.53	1.23	0.97	1.73	8.87	5.38	2.28	atac_glp1_se
chrI	4474653	4474804	2.36	2.53	2.01	1.50	1.53	1.39	0.79	1.91	10.51	5.02	1.60	atac_glp1_se
chrI	4475157	4475308	35.27	17.99	24.37	17.80	13.53	9.93	18.14	20.81	25.23	25.59	24.83	atac_wt_pe
chrI	4477215	4477366	1.60	1.84	1.72	1.45	1.12	1.37	1.11	1.66	5.94	4.33	1.67	atac_glp1_se
chrI	4480898	4481049	1.27	1.07	0.96	1.32	2.21	3.63	1.65	1.90	6.00	5.26	5.15	atac_wt_se
chrI	4485084	4485235	6.02	8.29	9.26	7.55	8.05	10.22	19.62	15.96	17.77	20.59	19.44	atac_wt_pe
chrI	4485337	4485488	2.16	4.26	5.27	2.77	3.36	6.80	12.62	10.22	11.17	10.86	9.41	atac_wt_se
chrI	4486726	4486877	2.82	6.19	14.48	11.67	12.20	15.93	30.73	27.07	27.26	26.88	22.87	atac_wt_pe
chrI	4487194	4487345	7.15	6.15	10.39	6.13	9.01	6.05	8.34	7.39	7.20	9.19	11.03	atac_wt_pe
chrI	4488240	4488391	2.38	3.68	4.21	3.03	3.39	3.48	4.32	4.57	3.35	3.38	4.83	atac_wt_se
chrI	4488900	4489051	0.86	2.17	1.61	1.93	1.69	2.40	2.13	2.81	4.37	4.76	7.08	atac_glp1_se
chrI	4489539	4489690	1.85	9.76	12.50	9.70	14.15	16.88	22.74	18.95	19.07	18.15	19.69	atac_wt_pe
chrI	4490406	4490557	37.60	73.11	128.87	82.91	78.01	48.56	85.42	84.00	76.11	81.44	80.16	atac_wt_pe
chrI	4490649	4490800	29.42	50.15	112.05	58.79	57.18	36.91	61.99	63.47	50.65	54.32	60.58	atac_wt_pe
chrI	4491563	4491714	1.49	2.84	3.30	1.93	2.90	3.07	3.05	3.27	3.53	3.34	4.19	atac_wt_pe
chrI	4492456	4492607	1.83	1.29	2.84	2.41	2.30	4.56	11.07	14.90	16.41	15.58	20.74	atac_wt_pe
chrI	4493412	4493563	1.54	3.30	2.98	2.70	2.22	2.82	5.12	5.84	4.05	6.00	5.16	atac_glp1_se
chrI	4493781	4493932	3.38	3.29	6.95	3.69	3.84	3.41	4.14	6.37	7.02	6.37	6.80	atac_wt_pe
chrI	4494108	4494259	2.87	6.64	7.35	4.76	6.86	6.74	10.87	10.69	9.30	10.99	9.64	atac_wt_pe
chrI	4494841	4494992	19.66	14.44	21.73	14.91	7.25	7.59	6.76	8.88	7.80	10.92	11.77	atac_wt_pe
chrI	4495089	4495240	9.11	19.33	29.48	21.62	12.11	11.36	19.99	27.43	28.73	32.35	30.19	atac_wt_pe
chrI	4495790	4495941	2.14	2.06	3.07	2.21	1.77	2.10	1.75	3.54	5.15	3.57	4.31	atac_glp1_se
chrI	4496738	4496889	5.61	4.23	7.00	3.96	2.32	2.62	2.77	3.88	3.53	4.10	5.29	atac_wt_se
chrI	4511189	4511340	2.43	3.12	1.68	3.51	5.93	8.02	3.91	3.28	4.17	3.87	4.10	atac_wt_pe
chrI	4516219	4516370	22.61	16.61	29.77	27.81	30.67	25.56	43.63	34.82	28.72	26.44	24.41	atac_wt_pe
chrI	4517044	4517195	1.26	2.56	3.27	5.61	6.14	6.50	15.29	12.26	16.04	13.74	9.57	atac_wt_pe
chrI	4528963	4529114	1.64	2.01	2.06	2.63	2.14	1.71	3.54	6.08	10.03	12.11	13.98	atac_glp1_se
chrI	4534944	4535095	1.47	2.75	1.70	3.65	2.52	2.30	2.43	2.21	2.67	2.36	2.68	atac_wt_pe
chrI	4535550	4535701	2.39	4.13	4.84	4.77	4.56	4.52	7.37	9.17	11.50	6.96	6.54	atac_glp1_se
chrI	4536076	4536227	248.88	185.05	335.37	263.59	241.41	138.75	280.56	280.40	271.19	253.67	236.15	atac_wt_pe
chrI	4537044	4537195	2.29	1.83	1.26	2.42	4.37	5.61	1.43	1.26	1.43	1.20	1.30	atac_wt_pe
chrI	4537268	4537419	1.25	1.44	0.83	1.34	3.87	6.72	0.64	1.02	0.84	0.72	0.95	atac_wt_pe
chrI	4539973	4540124	0.57	1.08	1.14	2.30	2.62	3.81	6.89	5.13	5.97	5.57	5.24	atac_wt_pe
chrI	4557181	4557332	97.50	73.62	105.08	101.87	84.94	58.35	133.21	134.47	122.42	119.80	93.26	atac_wt_pe
chrI	4557669	4557820	1.25	2.33	1.99	2.01	2.03	2.67	3.20	2.54	3.09	2.90	2.09	atac_wt_se
chrI	4562452	4562603	0.93	0.66	0.63	0.43	0.66	1.05	1.96	0.52	0.53	0.57	0.72	atac_glp1_se
chrI	4563236	4563387	0.91	1.26	1.30	0.92	1.11	2.84	4.21	2.31	1.25	1.52	1.03	atac_glp1_se
chrI	4563938	4564089	2.87	3.94	4.79	4.56	5.61	3.82	4.45	5.41	4.05	6.32	7.64	atac_wt_pe
chrI	4571027	4571178	6.02	2.35	1.81	1.55	1.54	1.76	0.63	0.94	0.86	1.03	0.92	atac_wt_pe
chrI	4573073	4573224	0.07	0.31	0.08	0.28	0.55	0.95	0.22	0.11	0.12	0.05	0.18	atac_wt_pe
chrI	4573663	4573814	0.16	0.42	0.15	0.26	0.55	2.03	0.20	0.15	0.17	0.24	0.23	atac_wt_pe
chrI	4574090	4574241	0.42	1.48	0.77	1.70	1.25	2.27	2.44	1.11	0.94	0.88	1.18	atac_wt_pe
chrI	4574315	4574466	0.33	2.53	0.66	1.74	2.19	5.04	4.29	2.25	1.53	1.92	2.08	atac_wt_se
chrI	4578516	4578667	0.92	1.31	1.12	1.22	1.55	4.07	8.76	4.61	5.90	6.38	5.63	atac_wt_pe
chrI	4578895	4579046	0.69	1.42	1.81	1.69	2.50	3.89	8.26	5.74	6.28	5.75	5.64	atac_wt_pe
chrI	4582321	4582472	0.74	1.26	1.09	1.12	1.54	1.99	0.86	0.99	1.97	2.77	3.90	atac_glp1_se
chrI	4583673	4583824	2.71	3.35	2.96	4.95	6.11	9.73	1.56	2.64	1.90	2.36	2.52	atac_wt_se
chrI	4584051	4584202	3.35	6.16	4.99	5.54	7.53	11.07	2.25	3.08	3.59	4.33	3.49	atac_wt_se
chrI	4584343	4584494	5.51	5.31	4.82	6.17	7.99	9.54	2.81	3.55	3.67	4.37	4.50	atac_wt_pe
chrI	4584780	4584931	47.54	45.59	53.60	66.77	66.52	58.69	64.57	59.37	61.13	73.19	69.84	atac_wt_pe
chrI	4585167	4585318	4.12	5.60	4.73	5.50	8.70	10.18	3.39	3.49	3.88	5.55	5.01	atac_wt_se
chrI	4586268	4586419	1.67	2.48	1.78	2.76	3.96	6.13	0.90	1.64	1.52	1.45	2.08	atac_wt_se
chrI	4587125	4587276	0.88	1.70	0.73	1.74	2.29	3.03	1.17	1.76	1.09	1.10	1.13	atac_wt_se
chrI	4587581	4587732	2.66	1.83	1.77	1.86	2.80	3.21	3.31	4.21	2.81	3.02	3.78	atac_wt_pe
chrI	4591095	4591246	1.71	3.20	2.03	4.89	4.07	5.55	8.66	4.96	3.83	4.82	5.98	atac_wt_pe
chrI	4592364	4592515	3.32	3.41	3.24	6.47	6.93	5.74	4.83	3.09	3.58	4.06	3.57	atac_wt_pe
chrI	4593490	4593641	0.95	1.29	1.86	1.89	2.08	1.47	2.70	1.10	1.42	1.56	1.40	atac_glp1_se
chrI	4596363	4596514	1.18	1.30	1.13	1.21	1.20	1.40	3.09	1.99	1.73	1.96	3.63	atac_glp1_se
chrI	4597725	4597876	1.20	2.20	2.12	5.18	4.81	4.32	12.74	10.68	10.27	9.89	7.65	atac_wt_pe
chrI	4602984	4603135	37.61	33.43	42.26	54.23	58.58	49.41	37.87	35.02	32.51	35.08	32.17	atac_wt_pe
chrI	4633333	4633484	0.89	2.07	1.11	2.40	3.75	4.79	3.64	4.17	7.90	8.03	8.47	atac_glp1_se
chrI	4633606	4633757	7.77	11.87	8.37	14.81	18.74	19.84	14.91	12.55	14.26	16.62	16.49	atac_wt_pe
chrI	4635185	4635336	3.24	3.36	3.24	4.49	4.91	4.48	2.44	3.35	2.85	2.36	2.37	atac_wt_pe
chrI	4635874	4636025	1.82	2.66	2.10	3.21	3.55	4.25	2.39	2.71	1.86	1.79	1.98	atac_wt_se
chrI	4636448	4636599	1.38	3.94	3.98	7.46	8.04	9.46	22.53	13.07	12.12	11.04	11.23	atac_wt_pe
chrI	4643340	4643491	1.80	2.47	2.65	4.28	5.16	5.64	10.23	9.57	10.98	10.52	6.57	atac_wt_pe
chrI	4644363	4644514	14.21	19.83	24.97	21.08	22.97	14.60	35.80	33.39	29.84	34.76	37.25	atac_wt_pe
chrI	4645460	4645611	1.85	2.49	1.89	3.48	5.07	12.95	1.72	2.05	1.84	2.09	2.04	atac_wt_pe
chrI	4645885	4646036	2.88	4.30	3.56	4.76	6.63	9.33	1.99	2.32	2.40	2.67	2.47	atac_wt_se
chrI	4646521	4646672	5.03	4.25	4.32	5.50	7.42	10.21	2.12	2.76	3.06	2.61	2.67	atac_wt_se
chrI	4646795	4646946	2.46	3.84	2.79	4.13	6.07	8.14	1.84	1.85	2.30	2.28	2.73	atac_wt_se
chrI	4647198	4647349	18.33	22.32	24.62	26.49	33.53	34.70	24.74	21.65	22.72	25.38	23.75	atac_wt_pe
chrI	4649595	4649746	0.78	1.11	0.54	1.06	1.16	2.26	4.00	3.34	3.12	3.39	2.71	atac_wt_se
chrI	4651045	4651196	3.07	4.03	3.33	5.91	7.61	8.47	9.40	9.35	10.62	10.30	13.42	atac_wt_pe
chrI	4651819	4651970	45.80	32.43	40.15	44.90	41.48	22.90	45.96	35.34	34.14	37.00	37.58	atac_wt_pe
chrI	4652512	4652663	1.20	2.47	1.55	2.54	3.28	2.85	1.21	1.56	1.85	2.00	1.66	atac_wt_se
chrI	4652973	4653124	0.81	2.15	1.22	2.30	4.02	4.01	4.77	2.90	3.53	3.32	4.34	atac_wt_pe
chrI	4653238	4653389	0.67	1.56	0.69	1.53	3.43	4.80	0.81	0.76	1.16	1.24	1.36	atac_wt_se
chrI	4653802	4653953	34.74	41.84	42.38	51.28	51.46	32.39	66.58	66.94	64.85	59.17	51.04	atac_wt_pe
chrI	4654136	4654287	112.87	79.15	96.73	104.81	88.48	54.99	137.69	156.57	151.36	141.88	124.15	atac_wt_pe
chrI	4654873	4655024	3.01	3.78	1.94	2.52	5.46	2.82	1.90	1.94	1.88	2.23	1.96	atac_wt_pe
chrI	4655324	4655475	2.36	2.63	2.21	2.79	3.11	2.66	1.47	1.98	1.53	1.71	1.84	atac_wt_se
chrI	4660195	4660346	4.71	2.55	2.71	3.35	2.37	2.99	1.88	2.27	2.89	2.93	2.36	atac_wt_se
chrI	4662521	4662672	14.10	16.12	9.82	11.01	7.74	6.98	12.27	11.55	11.69	13.58	15.29	atac_wt_pe
chrI	4663420	4663571	10.20	3.80	2.35	3.17	2.66	3.52	4.61	5.29	6.33	6.87	8.10	atac_wt_pe
chrI	4667820	4667971	1.29	1.56	1.24	1.56	1.86	1.76	1.96	2.83	5.75	4.88	3.80	atac_glp1_se
chrI	4671789	4671940	61.34	35.24	30.09	46.92	36.50	29.90	50.86	35.03	38.67	41.40	43.00	atac_wt_pe
chrI	4672239	4672390	32.61	22.14	22.29	34.18	32.70	23.54	41.11	35.90	37.18	40.17	38.37	atac_wt_pe
chrI	4672728	4672879	2.48	8.82	11.10	11.66	16.45	12.59	21.85	16.48	24.04	27.92	31.70	atac_wt_pe
chrI	4673918	4674069	18.37	33.18	58.49	33.72	31.15	19.31	45.49	46.07	37.27	46.53	49.71	atac_wt_pe
chrI	4677151	4677302	1.17	2.23	1.25	1.55	1.96	3.21	6.74	5.32	5.12	5.10	3.91	atac_wt_pe
chrI	4677573	4677724	0.77	1.42	0.64	0.87	1.26	1.67	3.12	3.21	3.20	2.99	3.19	atac_wt_pe
chrI	4679538	4679689	4.30	2.12	1.24	1.52	1.66	2.48	1.33	1.61	2.07	2.53	2.79	atac_wt_pe
chrI	4679919	4680070	1.74	1.92	1.13	1.43	1.51	1.83	1.96	2.11	2.88	2.99	4.90	atac_glp1_se
chrI	4680280	4680431	1.24	1.28	1.51	1.33	1.38	1.95	1.22	1.54	2.41	2.28	3.87	atac_glp1_se
chrI	4683709	4683860	2.79	3.80	2.49	3.98	2.84	3.09	4.43	3.09	3.50	3.52	3.80	atac_wt_se
chrI	4684500	4684651	4.79	6.90	4.58	5.25	6.45	3.08	2.67	2.46	3.26	3.32	4.09	atac_wt_pe
chrI	4699398	4699549	249.30	194.10	325.47	228.64	221.86	123.68	258.98	256.45	240.81	239.02	223.34	atac_wt_pe
chrI	4700231	4700382	1.91	4.24	2.29	3.66	4.08	3.05	6.19	7.10	6.39	6.69	5.66	atac_wt_se
chrI	4700505	4700656	7.66	6.38	5.99	6.40	4.88	3.21	4.75	4.95	5.90	6.61	6.64	atac_wt_pe
chrI	4701240	4701391	185.81	133.53	193.55	169.70	168.09	88.95	163.14	135.91	117.31	131.53	133.71	atac_wt_pe
chrI	4701890	4702041	16.24	11.10	9.85	13.38	11.87	7.37	12.38	9.01	7.06	9.79	10.42	atac_wt_pe
chrI	4702532	4702683	4.01	3.27	2.50	2.49	2.02	1.85	1.37	1.83	1.65	1.68	1.94	atac_wt_pe
chrI	4703244	4703395	72.61	18.66	28.42	19.26	12.11	7.31	12.26	14.50	11.53	17.95	20.05	atac_wt_pe
chrI	4704388	4704539	1.76	3.19	2.02	3.01	4.33	5.64	4.19	3.61	3.24	3.37	3.63	atac_wt_pe
chrI	4714704	4714855	1.11	1.42	1.42	1.20	1.29	1.74	2.39	3.22	3.79	3.53	3.02	atac_glp1_se
chrI	4715516	4715667	1.05	1.13	0.97	0.72	1.63	1.69	2.76	2.70	2.00	1.74	2.20	atac_glp1_se
chrI	4720354	4720505	1.79	1.99	1.71	1.68	1.66	1.84	3.29	3.53	4.19	4.38	4.33	atac_glp1_se
chrI	4721125	4721276	12.18	20.12	19.12	28.95	31.19	28.77	57.67	51.06	59.00	50.37	44.34	atac_wt_pe
chrI	4723919	4724070	0.63	0.80	0.52	0.80	0.86	1.23	1.53	2.24	3.80	2.99	2.24	atac_glp1_se
chrI	4724494	4724645	0.71	0.98	0.84	0.75	1.00	1.29	1.94	3.15	6.41	5.32	4.61	atac_glp1_se
chrI	4726647	4726798	0.99	1.75	1.27	2.45	2.35	3.96	6.50	4.24	5.38	6.36	4.72	atac_wt_pe
chrI	4727149	4727300	7.08	8.78	7.71	10.53	8.89	11.04	19.99	16.43	17.69	21.24	20.60	atac_wt_pe
chrI	4728981	4729132	1.40	1.15	1.03	1.09	1.01	1.45	1.03	1.87	4.34	3.76	3.39	atac_glp1_se
chrI	4730573	4730724	1.32	1.79	1.75	2.50	2.14	2.99	6.19	5.50	6.31	8.59	11.03	atac_wt_se
chrI	4731450	4731601	1.34	1.66	1.96	4.76	4.20	2.98	6.85	7.12	13.61	17.71	22.53	atac_wt_pe
chrI	4731983	4732134	1.26	1.94	1.45	2.72	2.70	2.25	3.37	4.92	6.57	7.70	4.96	atac_wt_se
chrI	4744815	4744966	4.28	3.56	4.71	4.94	5.94	4.22	9.82	7.96	8.66	10.20	8.48	atac_wt_pe
chrI	4745429	4745580	75.45	33.11	39.64	49.23	41.36	22.65	61.92	56.28	54.15	55.27	48.80	atac_wt_pe
chrI	4745830	4745981	2.38	4.50	3.18	4.19	6.92	3.02	3.65	4.67	4.93	5.49	5.69	atac_wt_pe
chrI	4746553	4746704	9.96	3.15	3.56	6.92	11.70	3.59	2.80	3.09	2.98	3.11	3.74	atac_wt_pe
chrI	4746927	4747078	11.73	5.26	8.49	13.86	16.72	10.63	14.29	13.84	15.58	15.23	11.64	atac_wt_pe
chrI	4747534	4747685	2.79	3.24	2.06	3.88	6.73	7.78	2.73	3.60	3.41	4.08	3.32	atac_wt_pe
chrI	4747861	4748012	1.26	1.97	1.42	1.59	2.14	3.20	1.51	2.96	2.97	3.01	2.35	atac_glp1_se
chrI	4748850	4749001	2.65	3.56	3.12	2.97	3.58	2.43	2.27	2.44	2.54	3.01	3.28	atac_wt_pe
chrI	4749165	4749316	1.29	1.96	1.35	1.15	1.83	2.39	2.17	2.31	3.29	3.19	3.53	atac_glp1_se
chrI	4750434	4750585	3.66	3.54	2.98	2.19	2.00	2.17	1.50	1.64	1.29	1.60	2.00	atac_wt_pe
chrI	4750902	4751053	1.53	2.35	2.22	1.90	2.77	2.71	3.13	3.62	3.82	4.00	4.21	atac_glp1_se
chrI	4751694	4751845	1.88	2.09	2.16	1.45	1.90	1.63	1.91	1.93	1.48	1.58	1.78	atac_glp1_se
chrI	4753533	4753684	1.90	1.93	1.93	2.53	2.12	2.11	1.90	1.80	1.69	1.30	1.86	atac_wt_pe
chrI	4754998	4755149	1.18	1.49	1.88	4.14	4.95	7.81	6.24	1.41	1.33	1.58	2.33	atac_wt_pe
chrI	4764905	4765056	1.84	1.82	1.46	1.74	2.58	2.88	1.52	2.30	1.36	1.65	1.89	atac_glp1_se
chrI	4765611	4765762	4.80	4.05	2.45	7.00	11.77	24.73	3.60	5.59	5.83	5.80	7.13	atac_wt_pe
chrI	4766200	4766351	0.86	1.76	0.75	1.15	1.63	2.74	0.68	0.89	0.82	0.74	0.72	atac_wt_se
chrI	4766999	4767150	1.94	1.78	1.68	1.66	1.84	2.88	1.04	2.16	1.35	1.15	1.56	atac_glp1_se
chrI	4767358	4767509	0.87	1.26	0.78	1.16	1.24	2.12	0.68	1.17	0.86	0.85	0.68	atac_wt_pe
chrI	4767826	4767977	5.12	10.46	5.31	8.19	9.06	14.23	16.00	10.90	7.96	10.17	9.53	atac_wt_pe
chrI	4769309	4769460	5.63	14.43	5.85	13.95	11.50	15.90	10.92	9.28	9.70	12.98	13.55	atac_wt_pe
chrI	4769598	4769749	18.76	25.21	20.30	32.48	24.04	24.19	32.09	28.03	34.01	36.46	31.46	atac_wt_pe
chrI	4769975	4770126	6.66	10.05	5.21	8.79	9.41	7.53	7.18	6.24	7.44	8.31	9.17	atac_wt_pe
chrI	4771997	4772148	1.26	2.26	2.31	3.41	4.53	3.77	6.14	5.04	6.78	5.83	4.12	atac_wt_pe
chrI	4773074	4773225	24.47	21.84	19.66	28.12	28.27	16.44	30.86	28.09	33.56	38.03	47.51	atac_wt_pe
chrI	4774153	4774304	1.08	2.49	1.75	2.05	2.23	2.25	1.44	1.87	1.97	1.78	1.69	atac_wt_se
chrI	4775883	4776034	1.62	1.43	1.45	1.65	1.41	3.30	3.61	2.48	2.41	1.96	1.38	atac_glp1_se
chrI	4777520	4777671	1.90	2.26	2.19	1.91	2.21	2.45	1.21	1.74	1.45	1.79	1.43	atac_wt_se
chrI	4777883	4778034	4.00	4.22	6.15	2.84	3.07	2.13	1.94	1.99	1.68	2.25	2.79	atac_wt_pe
chrI	4778865	4779016	2.53	2.42	2.32	2.84	4.83	2.63	4.44	2.72	2.71	2.47	2.44	atac_wt_pe
chrI	4779859	4780010	0.65	0.85	0.30	0.56	0.87	1.46	0.64	0.63	0.65	0.52	0.78	atac_wt_pe
chrI	4780452	4780603	10.38	2.39	2.76	3.30	3.07	2.41	1.95	2.60	1.93	2.03	2.25	atac_wt_pe
chrI	4781441	4781592	2.89	4.98	6.13	3.95	3.00	2.36	2.11	2.49	2.00	2.74	4.15	atac_wt_pe
chrI	4782403	4782554	2.02	2.56	2.01	2.20	2.94	2.95	3.77	3.81	4.00	4.26	4.58	atac_wt_pe
chrI	4785516	4785667	1.55	1.58	1.12	2.23	1.99	7.12	1.17	1.14	0.91	0.91	0.92	atac_wt_pe
chrI	4785674	4785825	1.82	2.01	1.76	3.25	2.97	8.64	1.67	1.06	1.02	0.90	1.28	atac_wt_pe
chrI	4786045	4786196	13.94	5.77	6.37	5.74	5.22	3.44	3.08	4.15	3.49	2.61	3.04	atac_wt_pe
chrI	4786322	4786473	12.14	3.85	3.16	2.51	3.80	3.03	1.45	1.98	1.54	1.72	1.79	atac_wt_pe
chrI	4786970	4787121	4.97	5.40	7.31	9.50	14.85	4.34	4.43	4.68	4.10	3.80	4.61	atac_wt_pe
chrI	4787925	4788076	13.64	4.23	3.80	6.94	6.31	4.24	2.65	3.68	2.66	2.66	3.09	atac_wt_pe
chrI	4788541	4788692	5.77	9.73	5.51	9.07	12.10	11.28	10.19	9.84	10.04	10.21	9.84	atac_wt_pe
chrI	4788967	4789118	10.41	9.98	6.38	12.80	11.57	10.98	15.33	12.67	9.75	9.17	8.46	atac_wt_pe
chrI	4789930	4790081	41.00	33.00	24.00	46.11	38.36	37.46	50.75	40.25	46.32	50.50	50.35	atac_wt_pe
chrI	4790442	4790593	3.14	4.78	3.02	5.54	7.25	13.11	6.12	3.93	4.56	4.56	4.94	atac_wt_pe
chrI	4790776	4790927	3.04	5.71	4.65	7.46	9.54	14.59	5.42	5.06	6.14	5.92	6.07	atac_wt_se
chrI	4792536	4792687	5.36	5.23	8.51	11.83	10.59	6.42	15.33	14.60	17.28	18.56	19.17	atac_wt_pe
chrI	4803980	4804131	1.59	1.86	1.31	1.89	1.88	3.07	3.72	3.12	3.46	3.87	4.22	atac_glp1_se
chrI	4804470	4804621	9.72	9.96	10.44	14.00	16.34	14.35	40.28	36.74	43.07	44.98	35.27	atac_wt_pe
chrI	4804847	4804998	3.25	4.09	5.98	9.82	13.68	12.96	32.80	28.43	32.17	31.46	27.87	atac_wt_pe
chrI	4805432	4805583	4.62	3.09	1.72	2.75	2.23	3.51	1.58	1.59	1.54	2.06	1.98	atac_wt_pe
chrI	4810595	4810746	3.93	2.24	1.74	1.68	1.76	1.67	1.55	1.45	1.30	1.66	1.91	atac_wt_pe
chrI	4816106	4816257	1.45	1.24	1.00	0.61	0.76	0.80	0.50	0.56	0.47	0.56	0.70	atac_wt_pe
chrI	4818485	4818636	3.03	2.72	2.25	1.51	1.64	1.03	1.39	1.47	1.48	1.81	2.15	atac_wt_pe
chrI	4826863	4827014	0.54	0.90	0.43	2.76	5.84	9.72	0.15	0.31	0.21	0.24	0.35	atac_wt_pe
chrI	4829892	4830043	6.30	5.13	5.42	5.86	7.67	8.20	9.48	8.95	7.73	9.33	8.22	atac_wt_pe
chrI	4835334	4835485	2.99	3.39	4.97	4.22	3.94	3.11	3.59	3.21	2.97	3.68	3.80	atac_wt_pe
chrI	4840967	4841118	3.31	4.85	6.02	3.68	4.34	3.17	4.32	4.88	3.80	5.35	6.64	atac_wt_pe
chrI	4847265	4847416	1.39	1.95	1.74	2.01	4.50	5.60	11.40	11.19	11.23	8.98	7.77	atac_wt_pe
chrI	4847721	4847872	1.40	2.64	2.13	3.53	4.25	4.97	9.87	6.37	7.00	7.62	5.18	atac_wt_pe
chrI	4848053	4848204	4.68	3.12	3.45	3.16	2.79	3.31	2.78	2.71	2.54	3.08	3.51	atac_wt_pe
chrI	4848726	4848877	0.70	1.56	0.66	1.08	1.76	4.02	0.34	0.47	0.55	0.67	0.63	atac_wt_se
chrI	4861976	4862127	3.41	3.63	4.89	2.34	1.97	1.49	1.62	1.70	1.83	2.46	3.07	atac_wt_pe
chrI	4864006	4864157	2.19	2.85	2.45	1.69	1.24	1.03	0.61	0.69	0.93	1.01	1.42	atac_wt_pe
chrI	4876017	4876168	2.89	2.78	4.60	2.44	1.68	1.77	1.76	2.52	1.80	2.55	2.84	atac_wt_pe
chrI	4878520	4878671	2.06	1.96	1.27	1.68	1.09	1.27	0.62	1.02	0.88	0.76	1.06	atac_wt_pe
chrI	4879558	4879709	2.01	1.74	2.19	1.73	2.22	1.93	3.09	3.15	2.77	3.46	3.41	atac_glp1_se
chrI	4881271	4881422	19.09	11.33	15.42	15.00	15.09	6.62	10.03	10.14	7.15	7.82	8.24	atac_wt_pe
chrI	4881925	4882076	6.36	2.77	2.71	2.66	3.43	1.97	1.78	1.57	1.53	1.76	2.35	atac_wt_pe
chrI	4885730	4885881	1.90	2.28	2.13	2.29	1.92	1.31	1.93	1.42	1.31	1.20	1.60	atac_glp1_se
chrI	4886484	4886635	1.38	1.95	1.58	2.59	2.15	1.94	1.49	1.54	1.23	1.43	1.47	atac_wt_pe
chrI	4887983	4888134	1.42	2.97	2.88	1.99	2.99	4.28	6.93	6.32	8.10	7.40	7.93	atac_wt_pe
chrI	4888473	4888624	2.04	3.35	3.24	1.82	1.67	1.79	1.16	1.70	1.20	1.41	1.80	atac_wt_se
chrI	4893654	4893805	1.79	6.26	4.44	2.25	1.97	1.89	1.58	1.46	1.15	1.31	1.48	atac_wt_pe
chrI	4895601	4895752	0.68	0.89	0.85	1.84	3.88	4.59	0.30	0.54	0.54	0.47	0.55	atac_wt_se
chrI	4895845	4895996	0.93	1.04	0.87	2.87	6.69	9.81	0.42	0.45	0.38	0.44	0.80	atac_wt_pe
chrI	4900956	4901107	7.03	8.29	10.43	7.12	5.65	3.34	6.09	5.78	4.38	7.77	8.05	atac_wt_pe
chrI	4906725	4906876	9.51	19.86	26.54	17.20	7.98	5.87	13.60	17.20	11.64	16.60	15.25	atac_wt_pe
chrI	4907844	4907995	2.14	3.00	3.59	2.57	1.77	1.59	1.61	2.68	2.23	2.53	2.34	atac_glp1_se
chrI	4908177	4908328	3.56	7.79	6.78	4.45	2.98	2.27	4.62	4.62	5.46	7.55	7.88	atac_wt_pe
chrI	4908993	4909144	2.17	3.64	3.56	2.87	2.64	2.47	4.35	5.27	4.44	5.00	7.95	atac_wt_pe
chrI	4911562	4911713	1.40	2.53	2.35	2.43	2.47	2.55	3.58	5.44	5.32	4.02	3.59	atac_glp1_se
chrI	4911949	4912100	4.18	3.95	3.56	4.70	5.27	3.51	6.58	5.72	7.04	5.71	5.88	atac_wt_pe
chrI	4912271	4912422	2.10	2.06	2.42	2.68	2.46	2.22	2.59	3.13	3.65	3.47	3.45	atac_glp1_se
chrI	4913289	4913440	1.55	2.64	2.60	3.25	3.60	2.61	2.46	3.61	3.94	3.63	4.21	atac_wt_se
chrI	4913871	4914022	1.20	2.36	1.87	2.87	2.67	2.07	1.97	2.93	3.15	2.70	2.78	atac_wt_pe
chrI	4914329	4914480	7.35	19.36	29.40	31.17	29.11	25.74	69.26	61.97	68.29	61.87	59.78	atac_wt_pe
chrI	4914956	4915107	13.68	10.25	10.42	8.91	6.92	6.08	6.93	6.63	6.68	7.15	7.80	atac_wt_pe
chrI	4915453	4915604	2.15	4.06	4.97	4.31	5.09	4.79	6.77	4.90	6.20	6.16	5.67	atac_wt_se
chrI	4915705	4915856	2.57	4.44	5.50	3.75	3.54	3.10	3.59	3.77	4.02	4.64	4.94	atac_wt_se
chrI	4916188	4916339	1.86	5.19	5.28	7.04	8.24	9.35	26.75	30.49	38.31	35.01	30.34	atac_wt_pe
chrI	4916447	4916598	2.70	7.88	7.47	7.86	8.44	9.20	25.06	30.35	29.15	28.19	23.72	atac_wt_pe
chrI	4916758	4916909	2.90	5.02	6.04	5.20	5.43	4.72	9.26	13.58	15.82	17.54	18.20	atac_wt_pe
chrI	4917427	4917578	3.22	5.32	5.22	4.93	8.50	8.40	12.61	13.36	14.88	15.59	12.22	atac_wt_pe
chrI	4917702	4917853	25.45	15.07	16.66	16.63	24.03	22.43	8.06	11.23	9.03	12.50	14.07	atac_wt_pe
chrI	4918188	4918339	3.15	4.11	4.73	5.84	7.95	6.53	5.54	6.48	6.22	5.88	6.87	atac_wt_pe
chrI	4921216	4921367	2.03	2.88	2.91	2.70	3.81	3.73	5.69	5.62	6.28	6.76	7.81	atac_wt_pe
chrI	4926485	4926636	19.60	16.09	12.37	19.90	17.46	21.91	23.39	18.79	23.35	26.75	25.59	atac_wt_pe
chrI	4928755	4928906	0.50	1.57	0.66	1.16	1.32	2.01	2.92	3.01	3.28	3.87	2.45	atac_glp1_se
chrI	4930374	4930525	6.06	2.99	2.53	2.54	2.25	1.76	1.00	1.42	1.26	1.22	1.46	atac_wt_pe
chrI	4931612	4931763	3.34	2.52	2.00	2.17	2.10	2.01	1.80	1.56	1.89	1.96	2.06	atac_wt_pe
chrI	4932201	4932352	4.40	4.53	2.69	2.75	2.79	3.39	1.92	2.32	2.06	2.12	2.06	atac_wt_se
chrI	4932485	4932636	11.55	5.33	4.58	4.79	3.52	3.12	2.01	2.15	1.88	2.67	2.51	atac_wt_pe
chrI	4932958	4933109	121.65	77.37	113.96	77.26	75.13	46.50	75.16	71.50	53.25	66.35	59.53	atac_wt_pe
chrI	4933288	4933439	17.62	18.84	22.08	19.38	22.79	21.76	42.70	42.25	41.70	43.31	33.59	atac_glp1_se
chrI	4933463	4933614	16.48	10.29	13.96	11.67	13.25	10.58	24.86	27.00	26.09	26.48	21.38	atac_wt_pe
chrI	4933880	4934031	6.01	4.76	6.03	6.84	6.84	4.78	4.55	5.00	3.45	4.01	4.88	atac_wt_pe
chrI	4934223	4934374	2.78	3.63	3.93	3.40	3.59	3.47	3.54	3.12	3.89	5.11	5.92	atac_wt_se
chrI	4936116	4936267	14.33	10.29	12.95	12.52	9.82	4.65	7.66	8.67	7.42	9.61	13.91	atac_wt_pe
chrI	4936355	4936506	30.13	26.64	28.78	27.95	22.00	8.40	18.75	15.34	12.35	15.92	20.60	atac_wt_pe
chrI	4936970	4937121	4.91	3.58	5.21	3.91	4.53	3.65	4.42	6.06	8.13	8.68	8.64	atac_wt_pe
chrI	4937245	4937396	2.20	2.00	2.98	2.55	3.68	3.76	4.29	4.81	7.87	10.59	14.62	atac_wt_se
chrI	4939893	4940044	3.01	2.08	1.32	2.84	3.99	5.92	0.91	0.98	0.67	1.13	1.21	atac_wt_pe
chrI	4941036	4941187	8.22	11.04	16.43	13.88	11.47	6.78	13.49	13.90	10.14	12.55	14.11	atac_wt_se
chrI	4941309	4941460	16.65	22.04	35.14	26.16	20.71	11.13	22.62	24.60	17.53	21.23	22.79	atac_wt_pe
chrI	4941824	4941975	2.94	3.69	3.60	3.47	3.36	2.69	2.32	2.29	2.60	2.73	2.43	atac_wt_se
chrI	4942238	4942389	1.37	2.13	1.72	2.20	1.94	1.97	2.84	3.01	4.67	4.84	5.83	atac_glp1_se
chrI	4942672	4942823	3.60	4.11	3.89	4.23	5.31	4.24	5.29	5.38	6.82	6.42	7.32	atac_wt_pe
chrI	4943036	4943187	2.88	2.40	2.82	3.26	4.24	3.62	4.29	7.01	5.07	4.93	5.61	atac_glp1_se
chrI	4943346	4943497	2.41	3.47	3.33	3.50	3.87	2.92	3.39	4.08	3.22	2.51	3.38	atac_wt_se
chrI	4952639	4952790	2.30	4.29	2.37	4.15	4.09	4.65	9.24	10.33	8.75	7.82	6.58	atac_wt_pe
chrI	4953474	4953625	1.00	1.33	1.38	1.39	1.54	1.64	1.14	1.46	1.64	2.57	1.77	atac_glp1_se
chrI	4954287	4954438	0.95	1.58	1.37	1.60	1.28	1.71	1.84	1.92	2.90	3.18	2.78	atac_glp1_se
chrI	4958259	4958410	4.42	4.58	2.20	3.49	3.98	4.38	4.08	4.23	4.19	3.74	4.42	atac_wt_pe
chrI	4958773	4958924	4.57	4.77	1.81	8.05	9.71	20.35	2.97	3.37	2.38	3.43	3.21	atac_wt_pe
chrI	4959202	4959353	3.54	2.49	1.16	8.59	17.51	29.36	1.45	1.89	1.03	1.47	1.39	atac_wt_pe
chrI	4961787	4961938	1.23	1.44	0.93	1.30	1.81	3.73	0.43	0.60	0.49	0.70	0.68	atac_wt_pe
chrI	4962150	4962301	1.98	1.90	1.38	1.75	2.77	4.62	0.56	0.93	0.76	0.95	0.83	atac_wt_pe
chrI	4967402	4967553	10.36	6.76	10.20	14.13	20.04	21.88	15.24	14.94	14.67	18.72	14.69	atac_wt_pe
chrI	4967575	4967726	15.48	13.74	17.97	27.00	31.01	32.60	27.18	25.54	24.59	29.48	24.03	atac_wt_pe
chrI	4972371	4972522	7.54	1.94	1.52	1.39	1.16	1.47	0.74	1.01	1.00	0.93	1.41	atac_wt_pe
chrI	4973150	4973301	38.16	5.34	6.01	4.86	3.89	4.13	2.81	3.05	3.22	3.27	5.60	atac_wt_pe
chrI	4973710	4973861	2.01	2.55	2.31	1.92	3.24	3.11	3.59	2.51	2.43	3.97	7.87	atac_wt_pe
chrI	4974159	4974310	3.06	3.77	3.83	3.42	4.01	2.73	3.30	4.51	3.95	4.46	5.28	atac_wt_pe
chrI	4974788	4974939	26.06	14.43	13.60	16.41	12.79	7.73	15.48	14.46	13.20	12.28	14.21	atac_wt_pe
chrI	4975154	4975305	4.89	4.13	4.79	3.85	3.41	2.69	4.30	3.80	3.36	3.25	3.70	atac_wt_pe
chrI	4975957	4976108	11.66	3.75	6.62	4.79	5.21	2.70	2.49	2.90	2.52	3.32	3.84	atac_wt_se
chrI	4976279	4976430	26.09	9.32	13.58	11.26	7.83	5.12	6.82	7.61	7.89	8.95	10.18	atac_wt_pe
chrI	4977442	4977593	7.82	4.13	5.59	4.80	6.13	4.68	4.91	5.44	4.22	4.33	4.81	atac_wt_pe
chrI	4980087	4980238	5.91	5.40	6.37	8.34	11.45	8.20	17.69	13.04	13.30	12.64	10.89	atac_wt_pe
chrI	4980846	4980997	2.38	1.85	1.44	1.78	1.94	2.04	1.61	1.63	1.30	1.72	1.49	atac_wt_pe
chrI	4992214	4992365	11.15	11.33	10.14	11.28	10.73	10.14	17.44	17.38	12.24	12.24	9.68	atac_wt_pe
chrI	4993698	4993849	8.99	4.22	3.69	4.31	5.87	5.90	6.73	8.01	6.59	6.71	6.34	atac_wt_pe
chrI	4994147	4994298	2.22	2.97	2.13	2.47	3.89	4.40	8.73	9.65	8.21	8.27	9.59	atac_wt_pe
chrI	4994627	4994778	6.37	4.59	3.52	2.33	2.86	2.76	3.30	3.48	3.22	3.85	4.42	atac_wt_pe
chrI	4996032	4996183	1.97	3.52	3.45	3.25	6.79	4.18	8.05	6.54	8.52	9.88	11.57	atac_wt_pe
chrI	4996599	4996750	13.29	8.62	11.98	16.83	18.30	17.60	41.57	31.79	33.97	34.63	31.85	atac_wt_pe
chrI	5008262	5008413	1.50	1.86	1.72	1.29	1.90	1.58	3.00	2.21	2.11	2.30	2.21	atac_glp1_se
chrI	5008614	5008765	1.81	3.63	6.50	3.32	3.04	5.03	10.41	7.19	6.77	7.40	6.24	atac_wt_pe
chrI	5010006	5010157	0.98	4.78	4.28	2.90	3.59	4.04	9.72	11.26	10.44	10.77	9.60	atac_wt_se
chrI	5010666	5010817	1.28	2.00	1.71	1.61	0.93	1.65	1.72	2.18	3.35	2.08	2.85	atac_glp1_se
chrI	5014764	5014915	2.28	3.01	3.23	3.23	3.15	2.29	1.69	3.41	4.06	4.65	5.18	atac_wt_pe
chrI	5015765	5015916	13.31	13.73	16.41	14.59	12.08	5.86	10.30	8.27	6.74	9.34	10.46	atac_wt_pe
chrI	5016198	5016349	2.67	3.69	2.99	2.88	2.51	1.83	1.11	1.20	1.30	1.14	1.69	atac_wt_se
chrI	5018106	5018257	3.83	4.36	4.86	2.78	3.93	2.19	2.26	2.22	1.76	1.61	2.02	atac_wt_pe
chrI	5020159	5020310	24.22	21.88	25.02	20.33	15.28	9.61	19.33	17.62	14.51	16.97	21.97	atac_wt_pe
chrI	5024082	5024233	2.34	2.55	2.93	3.08	3.32	3.43	6.12	3.88	4.13	4.53	5.17	atac_wt_pe
chrI	5025204	5025355	1.57	3.80	4.76	5.64	8.62	6.74	10.02	8.24	9.98	13.03	9.88	atac_wt_pe
chrI	5025474	5025625	6.05	13.26	17.59	16.91	21.30	16.91	38.24	34.11	40.50	44.85	43.74	atac_wt_pe
chrI	5027633	5027784	2.01	2.38	2.59	2.28	3.41	2.67	2.95	3.31	2.83	2.49	2.26	atac_wt_pe
chrI	5028014	5028165	2.58	2.58	3.47	5.21	6.16	7.22	8.66	7.30	6.64	4.87	4.04	atac_wt_pe
chrI	5028272	5028423	0.99	1.35	1.36	1.67	2.17	2.20	4.05	3.20	3.75	3.94	2.87	atac_glp1_se
chrI	5031112	5031263	1.09	3.04	2.77	7.87	8.48	10.89	16.61	10.78	12.36	12.68	11.23	atac_wt_pe
chrI	5032999	5033150	1.93	3.40	2.99	4.83	7.04	8.49	18.94	15.70	16.42	14.19	6.34	atac_wt_pe
chrI	5033362	5033513	1.90	5.46	5.66	9.61	11.01	11.82	37.06	33.79	41.07	40.00	25.68	atac_wt_pe
chrI	5034111	5034262	1.12	1.76	1.92	1.98	3.25	2.13	3.46	3.59	4.25	5.18	6.48	atac_wt_pe
chrI	5034435	5034586	1.83	4.12	4.31	3.74	4.86	3.84	10.06	11.77	11.45	12.48	11.63	atac_wt_pe
chrI	5035086	5035237	1.76	2.59	2.71	2.65	3.05	2.30	3.49	2.94	2.97	2.93	2.88	atac_wt_se
chrI	5035681	5035832	7.83	11.24	19.14	18.20	25.25	16.42	37.83	32.33	30.63	29.47	27.32	atac_wt_pe
chrI	5036619	5036770	1.24	1.82	1.47	1.56	2.65	2.19	2.57	1.97	2.01	3.00	2.97	atac_glp1_se
chrI	5037041	5037192	0.92	2.94	1.85	2.83	4.77	4.40	8.06	6.24	8.12	9.44	8.84	atac_wt_pe
chrI	5037351	5037502	2.07	4.40	7.30	11.91	12.35	12.27	35.99	21.86	25.44	27.82	20.97	atac_wt_pe
chrI	5038305	5038456	1.16	1.62	1.34	1.65	2.12	2.17	3.63	3.02	3.21	3.92	5.04	atac_glp1_se
chrI	5049384	5049535	0.84	2.09	1.40	1.53	2.09	2.58	3.88	2.37	1.97	2.19	2.91	atac_wt_pe
chrI	5049937	5050088	1.33	1.64	2.66	3.37	2.12	3.29	6.21	3.50	3.40	4.28	3.64	atac_glp1_se
chrI	5055432	5055583	5.36	2.94	3.34	2.71	2.21	1.97	1.83	1.94	2.09	2.46	3.08	atac_wt_pe
chrI	5056997	5057148	3.90	9.77	11.13	7.08	5.00	3.44	7.67	7.80	5.15	7.66	9.28	atac_wt_pe
chrI	5057447	5057598	4.57	4.45	4.20	4.96	3.97	5.66	13.17	11.63	8.79	8.99	5.80	atac_wt_pe
chrI	5062154	5062305	21.98	13.29	21.77	18.57	22.40	9.28	15.08	10.18	8.98	12.75	13.12	atac_wt_pe
[truncated: 40,246 more rows]
