# Supplementary material for: Chromatin accessibility dynamics across C. elegans development and ageing
Source: eLife journal article supplement (doi:10.7554/elife.37344), 2018-10-26
Supplement: supp [file elife-37344-supp-v1.zip › elife_poa_e37344_Figure_2_figure_supplement_6.pdf]

Figure 2 - figure supplement 6

A

| gene       | chr | tested region start | tested region end | length | Annotation       | Reference                |
|------------|-----|---------------------|-------------------|--------|------------------|--------------------------|
| daz-1      | II  | 5455759             | 5456289           | 552    | prom             | Merritt et al, 2008      |
| gld-1      | I   | 7695164             | 7695660           | 527    | txn initiation   | Merritt et al, 2008      |
| him-3      | IV  | 6977138             | 6977484           | 372    | prom             | Merritt et al, 2008      |
| mex-5      | IV  | 13353211            | 13353674          | 486    | prom             | Merritt et al, 2008      |
| msp-56     | IV  | 9841000             | 9841495           | 513    | prom             | Merritt et al, 2008      |
| pgl-3      | V   | 4755287             | 4755970           | 709    | prom             | Merritt et al, 2008      |
| spe-11     | I   | 5332434             | 5332187           | 272    | no txn           | Merritt et al, 2008      |
| spn-4      | V   | 6784847             | 6785394           | 544    | prom             | Merritt et al, 2008      |
| fbf-1      | II  | 6080676             | 6081758           | 1114   | prom             | Merritt et al, 2008      |
| tag-243    | III | 4687158             | 4687357           | 199    | prom             | Hunt-Newbury et al, 2007 |
| atp-2      | III | 5228403             | 5228199           | 204    | no element       | Hunt-Newbury et al, 2007 |
| him-4      | X   | 9717247             | 9717573           | 326    | no element       | Hunt-Newbury et al, 2007 |
| lgc-34     | II  | 526514              | 526671            | 157    | prom             | Hunt-Newbury et al, 2007 |
| daf-5      | II  | 14040184            | 14040697          | 514    | prom + enh       | Chen et al 2014          |
| egrh-1     | X   | 14840974            | 14841376          | 403    | prom             | Chen et al 2014          |
| eif-3b     | II  | 14794905            | 14795250          | 346    | prom             | Chen et al 2014          |
| F58D5.5    | I   | 12039662            | 12040186          | 525    | prom             | Chen et al 2014          |
| hlh-11     | III | 9619057             | 9619496           | 440    | prom             | Chen et al 2014          |
| mtm-3      | III | 3801252             | 3801770           | 519    | prom             | Chen et al 2014          |
| rho-1      | IV  | 16492191            | 16492669          | 479    | unknown promoter | Chen et al 2014          |
| T19C3.4    | III | 623811              | 624139            | 329    | prom             | Chen et al 2014          |
| otub-2     | I   | 397755              | 398120            | 366    | prom             | Chen et al 2014          |
| Y71H2AM.20 | III | 2785938             | 2786194           | 257    | prom             | Chen et al 2014          |

C

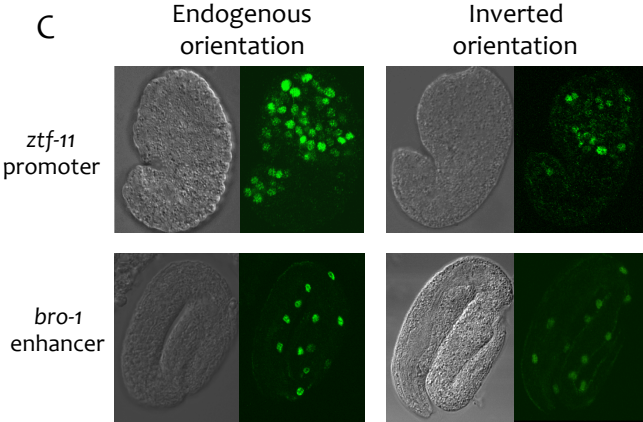

B

| locus      | chr | start    | stop     | gene strand | annotation       | tested orientation relative to gene | Expression | Expression strength (Strong,medium, weak) | Embryo expression                                              | Reference        | Strain Name | Genotype                      |
|------------|-----|----------|----------|-------------|------------------|-------------------------------------|------------|-------------------------------------------|----------------------------------------------------------------|------------------|-------------|-------------------------------|
| otub-2     | I   | 397755   | 398120   | +           | prom             | endogenous                          | Yes        | strong                                    | broad                                                          | Chen et al, 2014 | JA1613      | weSi68 II; unc-119(ed3) III   |
| hlh-2      | I   | 7194716  | 7195216  | -           | prom             | endogenous                          | Yes        | strong                                    | broad, but not in intestine                                    | this paper       | JA1652      | weSi89 II; unc-119(ed3) III   |
| ztf-11     | I   | 9910350  | 9910850  | -           | prom             | endogenous                          | Yes        | strong                                    | broad, but not in intestine                                    | this paper       | JA1733      | weSi142 II; unc-119(ed3) III  |
| ztf-11     | I   | 9910350  | 9910850  | -           | prom             | inverted                            | Yes        | medium                                    | broad, but not in intestine (weaker than endogenous direction) | this paper       | JA1727      | weSi136 II; unc-119(ed3) III  |
| F58D5.5    | I   | 12039662 | 12040186 | +           | prom             | endogenous                          | Yes        | strong                                    | broad                                                          | Chen et al, 2014 | JA1608      | weSi63 II; unc-119(ed3) III   |
| F58D5.5    | I   | 12039662 | 12040186 | +           | prom             | inverted                            | Yes        | strong                                    | broad                                                          | this paper       | JA1765      | weSi145 II; unc-119(ed3) III  |
| daf-5      | II  | 14040184 | 14040697 | +           | prom + enh       | endogenous                          | Yes        | strong                                    | broad                                                          | Chen et al, 2014 | JA1620      | weSi72 II; unc-119(ed3) III   |
| eif-3b     | II  | 14794905 | 14795250 | -           | prom             | endogenous                          | Yes        | strong                                    | broad                                                          | Chen et al, 2014 | JA1601      | weSi61 II; unc-119(ed3) III   |
| T19C3.4    | III | 623811   | 624139   | -           | prom             | endogenous                          | Yes        | strong                                    | broad                                                          | Chen et al, 2014 | JA1612      | weSi67 II; unc-119(ed3) III   |
| Y71H2AM.20 | III | 2785938  | 2786194  | -           | prom             | endogenous                          | Yes        | strong                                    | broad                                                          | Chen et al, 2014 | JA1600      | weSi60 II; unc-119(ed3) III   |
| mtm-3      | III | 3801252  | 3801770  | -           | prom             | endogenous                          | Yes        | strong                                    | broad                                                          | Chen et al, 2014 | JA1610      | weSi65 II; unc-119(ed3) III   |
| hlh-11     | III | 9619057  | 9619496  | +           | prom             | endogenous                          | Yes        | strong                                    | broad                                                          | Chen et al, 2014 | JA1609      | weSi64 II; unc-119(ed3) III   |
| bed-3      | IV  | 9915158  | 9915437  | +           | prom             | endogenous                          | Yes        | weak                                      | ~20 hypodermal cells                                           | this paper       | JA1712      | weSi128 II; unc-119(ed3) III  |
| rho-1      | IV  | 16492191 | 16492669 | -           | unknown promoter | endogenous                          | Yes        | strong                                    | broad                                                          | Chen et al, 2014 | JA1611      | weSi66 II; unc-119(ed3) III   |
| egrh-1     | X   | 14840974 | 14841376 | +           | prom             | endogenous                          | Yes        | strong                                    | broad                                                          | Chen et al, 2014 | JA1614      | weSi69 II; unc-119(ed3) III   |
| bro-1      | I   | 5187416  | 5187609  | +           | enh-intronic     | endogenous                          | Yes        | medium                                    | seam cells                                                     | this paper       | JA1708      | weSi130 II ; unc-119(ed3) III |
| bro-1      | I   | 5187416  | 5187609  | +           | enh-intronic     | inverted                            | Yes        | weak                                      | seam cells                                                     | this paper       | JA1737      | weSi146 II; unc-119(ed3) III  |
| hlh-2      | I   | 7195757  | 7196257  | -           | enh              | endogenous                          | Yes        | medium                                    | few anterior cells                                             | this paper       | JA1674      | weSi108 II; unc-119(ed3) III  |
| hlh-2      | I   | 7196571  | 7197071  | -           | enh              | endogenous                          | Yes        | weak                                      | 10-20 anterior cells                                           | this paper       | JA1663      | weSi97 II; unc-119(ed3) III   |
| hlh-2      | I   | 7197592  | 7198092  | -           | enh              | endogenous                          | Yes        | medium                                    | few hypodermal cells                                           | this paper       | JA1669      | weSi103 II; unc-119(ed3) III  |
| hlh-2      | I   | 7197592  | 7198092  | -           | enh              | inverted                            | Yes        | medium                                    | few hypodermal cells (weaker than endogenous orientation)      | this paper       | JA1701      | weSi123 II; unc-119(+)]III    |
| hlh-2      | I   | 7198146  | 7198646  | -           | enh              | endogenous                          | Yes        | medium                                    | few pharyngeal cells                                           | this paper       | JA1671      | weSi105 II; unc-119(ed3) III  |
| hlh-2      | I   | 7198751  | 7199251  | -           | enh              | endogenous                          | Yes        | medium                                    | few pharyngeal cells                                           | this paper       | JA1673      | weSi107 II; unc-119(ed3) III  |
| ztf-11     | I   | 9911508  | 9912008  | -           | enh              | endogenous                          | yes        | weak                                      | broad, most cells                                              | this paper       | JA1667      | weSi101 II; unc-119(ed3) III  |
| bed-3      | IV  | 9910252  | 9910601  | +           | enh              | endogenous                          | Yes        | medium                                    | few anterior cells                                             | this paper       | JA1703      | weSi125 II; unc-119(ed3) III  |
| bed-3      | IV  | 9911938  | 9912226  | +           | enh              | endogenous                          | Yes        | weak                                      | ~15 nuclei, head and tail                                      | this paper       | JA1711      | weSi133II; unc-119(ed3) III   |
| bed-3      | IV  | 9913192  | 9913425  | +           | enh              | endogenous                          | no         |                                           | no expression                                                  | this paper       | JA1704      | weSi126 II; unc-119(ed3) III  |
| bed-3      | IV  | 9914205  | 9914396  | +           | enh              | endogenous                          | no         |                                           | no expression                                                  | this paper       | JA1705      | weSi127 II; unc-119(ed3) III  |
| bed-3      | IV  | 9918007  | 9918207  | +           | enh-intronic     | endogenous                          | Yes        | weak                                      | few hypodermal cells                                           | this paper       | JA1707      | weSi129 II; unc-119(ed3) III  |
