# Supplementary material for: Chromatin accessibility dynamics across C. elegans development and ageing
Source: eLife journal article supplement (doi:10.7554/elife.37344), 2018-10-26
Supplement: supp [file elife-37344-supp-v1.zip › elife_poa_e37344_Figure_2_source_data_1.txt]

chrom_ce10	start_ce10	end_ce10	chrom_ce11	start_ce11	end_ce11	annot	annot_fwd	annot_rev	promoter_gene_id_fwd	promoter_locus_id_fwd	promoter_gene_biotype_fwd	promoter_gene_id_rev	promoter_locus_id_rev	promoter_gene_biotype_rev	associated_gene_id	associated_locus_id	tss_fwd_ce10	tss_rev_ce10	tss_fwd_ce11	tss_rev_ce11	scap_fwd_passed	scap_rev_passed	lcap_wt_emb_fwd_passed_jump	lcap_wt_l1_fwd_passed_jump	lcap_wt_l2_fwd_passed_jump	lcap_wt_l3_fwd_passed_jump	lcap_wt_l4_fwd_passed_jump	lcap_wt_ya_fwd_passed_jump	lcap_glp1_d1_fwd_passed_jump	lcap_glp1_d2_fwd_passed_jump	lcap_glp1_d6_fwd_passed_jump	lcap_glp1_d9_fwd_passed_jump	lcap_glp1_d13_fwd_passed_jump	lcap_wt_emb_fwd_passed_incr	lcap_wt_l1_fwd_passed_incr	lcap_wt_l2_fwd_passed_incr	lcap_wt_l3_fwd_passed_incr	lcap_wt_l4_fwd_passed_incr	lcap_wt_ya_fwd_passed_incr	lcap_glp1_d1_fwd_passed_incr	lcap_glp1_d2_fwd_passed_incr	lcap_glp1_d6_fwd_passed_incr	lcap_glp1_d9_fwd_passed_incr	lcap_glp1_d13_fwd_passed_incr	lcap_wt_emb_rev_passed_jump	lcap_wt_l1_rev_passed_jump	lcap_wt_l2_rev_passed_jump	lcap_wt_l3_rev_passed_jump	lcap_wt_l4_rev_passed_jump
chrI	1900	2051	chrI	1900	2051	putative_enhancer	transcription_initiation	transcription_initiation	.	.	.	.	.	.	.	.	2008	1957	2008	1957	True	True	False	False	False	False	False	False	False	False	False	False	False	False	False	False	False	False	False	False	False	False	False	False	False	False	False	False	False
chrI	3826	3977	chrI	3826	3977	non-coding_RNA	unassigned_promoter	non-coding_RNA	.	.	.	WBGene00023193	Y74C9A.6	snoRNA	.	.	3905	3908	3905	3908	True	True	False	False	False	False	True	False	False	False	False	False	False	False	False	False	False	False	False	False	False	False	False	False	True	True	True	True	True
chrI	4276	4427	chrI	4276	4427	putative_enhancer	no_transcription	transcription_initiation	.	.	.	.	.	.	WBGene00022277	homt-1	4411	4363	4411	4363	False	True	False	False	False	False	False	False	False	False	False	False	False	False	False	False	False	False	False	False	False	False	False	False	False	False	False	False	False
chrI	11272	11423	chrI	11272	11423	coding_promoter	coding_promoter	coding_promoter	WBGene00022276	nlp-40	protein_coding	WBGene00022277	homt-1	protein_coding	.	.	11293	11415	11293	11415	True	True	False	True	True	True	True	True	True	True	True	True	True	False	False	False	True	False	False	True	True	False	True	True	False	False	False	False	False
chrI	13070	13221	chrI	13070	13221	putative_enhancer	no_transcription	transcription_initiation	.	.	.	.	.	.	WBGene00022276	nlp-40	13205	13039	13205	13039	False	True	False	False	False	False	False	False	False	False	False	False	False	False	False	False	False	False	False	False	False	False	False	False	False	False	False	False	False
chrI	15430	15581	chrI	15430	15581	unassigned_promoter	transcription_initiation	unassigned_promoter	.	.	.	.	.	.	WBGene00022276	nlp-40	15500	15607	15500	15607	True	True	False	False	False	False	False	False	False	False	False	False	False	False	False	False	False	False	False	False	False	False	False	False	False	False	False	True	False
chrI	15722	15873	chrI	15722	15873	putative_enhancer	transcription_initiation	no_transcription	.	.	.	.	.	.	WBGene00022276	nlp-40	15805	15737	15805	15737	True	False	True	True	True	True	True	True	True	True	True	True	True	True	True	True	False	False	False	True	True	False	True	True	False	False	False	False	False
chrI	16958	17109	chrI	16958	17109	unassigned_promoter	transcription_initiation	unassigned_promoter	.	.	.	.	.	.	.	.	17089	16942	17089	16942	True	True	False	False	False	False	False	False	False	False	False	False	False	False	False	False	False	False	False	False	False	False	False	False	True	False	False	True	True
chrI	22266	22417	chrI	22266	22417	putative_enhancer	transcription_initiation	transcription_initiation	.	.	.	.	.	.	WBGene00022278	rcor-1	22427	22324	22427	22324	True	True	False	False	False	False	False	False	False	False	False	False	False	False	False	False	False	False	False	False	False	False	False	False	False	False	False	False	False
chrI	22895	23046	chrI	22895	23046	other_element	no_transcription	no_transcription	.	.	.	.	.	.	WBGene00022278,WBGene00235381	Y74C9A.9,rcor-1	23030	22910	23030	22910	False	False	False	False	False	False	False	False	False	False	False	False	False	False	False	False	False	False	False	False	False	False	False	False	False	False	False	False	False
chrI	24452	24603	chrI	24452	24603	unassigned_promoter	unassigned_promoter	no_transcription	.	.	.	.	.	.	WBGene00022278	rcor-1	24584	24467	24584	24467	True	False	True	True	True	False	False	False	False	False	False	False	False	True	True	True	True	False	False	False	True	False	False	False	False	False	False	False	False
chrI	26902	27053	chrI	26902	27053	coding_promoter	no_transcription	coding_promoter	.	.	.	WBGene00022278	rcor-1	protein_coding	.	.	27037	26900	27037	26900	False	True	False	False	False	False	False	False	False	False	False	False	False	False	False	False	False	False	False	False	False	True	False	False	True	True	True	True	True
chrI	27082	27233	chrI	27082	27233	putative_enhancer	transcription_initiation	no_transcription	.	.	.	.	.	.	.	.	27190	27097	27190	27097	True	False	False	False	False	False	False	False	False	False	False	False	False	False	False	False	False	False	False	False	False	False	False	False	False	False	False	False	False
chrI	28163	28314	chrI	28163	28314	other_element	no_transcription	no_transcription	.	.	.	.	.	.	WBGene00022279	sesn-1	28298	28178	28298	28178	False	False	False	False	False	False	False	False	False	False	False	False	False	False	False	False	False	False	False	False	False	False	False	False	False	False	False	False	False
chrI	30271	30422	chrI	30271	30422	putative_enhancer	no_transcription	transcription_initiation	.	.	.	.	.	.	WBGene00022279	sesn-1	30406	30250	30406	30250	False	True	False	False	False	False	False	False	False	False	False	False	False	False	False	False	False	False	False	False	False	False	False	False	True	True	True	True	True
chrI	31958	32109	chrI	31958	32109	putative_enhancer	transcription_initiation	transcription_initiation	.	.	.	.	.	.	WBGene00022279	sesn-1	31968	32012	31968	32012	True	True	False	False	False	False	False	False	False	False	False	False	False	False	False	False	False	False	False	False	False	False	False	False	False	False	False	False	False
chrI	33340	33491	chrI	33340	33491	other_element	no_transcription	no_transcription	.	.	.	.	.	.	WBGene00022279	sesn-1	33475	33355	33475	33355	False	False	False	False	False	False	False	False	False	False	False	False	False	False	False	False	False	False	False	False	False	False	False	False	False	False	False	False	False
chrI	33764	33915	chrI	33764	33915	putative_enhancer	transcription_initiation	transcription_initiation	.	.	.	.	.	.	WBGene00022279	sesn-1	33906	33725	33906	33725	True	True	False	False	False	False	False	False	False	False	False	False	False	False	False	False	False	False	False	False	False	False	True	False	False	False	False	False	False
chrI	34239	34390	chrI	34239	34390	other_element	no_transcription	no_transcription	.	.	.	.	.	.	WBGene00022279	sesn-1	34374	34254	34374	34254	False	False	False	False	False	False	False	False	False	False	False	False	False	False	False	False	False	False	False	False	False	False	False	False	False	False	False	False	False
chrI	34626	34777	chrI	34626	34777	putative_enhancer	no_transcription	transcription_initiation	.	.	.	.	.	.	WBGene00022279	sesn-1	34761	34603	34761	34603	False	True	False	False	False	False	False	False	False	False	False	False	False	False	False	False	False	False	False	False	False	False	False	False	False	False	False	False	False
chrI	35381	35532	chrI	35381	35532	putative_enhancer	transcription_initiation	transcription_initiation	.	.	.	.	.	.	WBGene00022279	sesn-1	35543	35350	35543	35350	True	True	False	False	False	False	False	False	False	False	False	False	False	False	False	False	False	False	False	False	False	False	False	False	False	False	False	False	False
chrI	36018	36169	chrI	36018	36169	coding_promoter	transcription_initiation	coding_promoter	.	.	.	WBGene00022279	sesn-1	protein_coding	.	.	36111	36027	36111	36027	True	True	False	False	False	False	False	False	False	False	False	False	False	False	False	False	False	False	False	False	False	True	False	False	False	False	False	False	False
chrI	36471	36622	chrI	36471	36622	putative_enhancer	no_transcription	transcription_initiation	.	.	.	.	.	.	WBGene00022279	sesn-1	36606	36501	36606	36501	False	True	False	False	False	False	False	False	False	False	False	False	False	False	False	False	False	False	False	False	False	True	True	False	False	False	False	False	False
chrI	37988	38139	chrI	37988	38139	other_element	no_transcription	no_transcription	.	.	.	.	.	.	WBGene00022279	sesn-1	38123	38003	38123	38003	False	False	False	False	False	False	False	False	False	False	False	False	False	False	False	False	False	False	False	False	False	False	False	False	False	False	False	False	False
chrI	38986	39137	chrI	38986	39137	putative_enhancer	transcription_initiation	no_transcription	.	.	.	.	.	.	WBGene00022279	sesn-1	39108	39001	39108	39001	True	False	False	False	False	False	False	False	False	False	False	False	False	False	False	False	False	False	False	False	False	False	False	False	False	False	False	False	False
chrI	39776	39927	chrI	39776	39927	unassigned_promoter	unassigned_promoter	unassigned_promoter	.	.	.	.	.	.	WBGene00022279	sesn-1	39946	39829	39946	39829	True	True	False	True	True	False	False	False	False	False	True	False	False	False	True	False	False	True	True	False	False	True	False	True	False	False	False	False	False
chrI	40327	40478	chrI	40327	40478	other_element	no_transcription	no_transcription	.	.	.	.	.	.	WBGene00022279	sesn-1	40462	40342	40462	40342	False	False	False	False	False	False	False	False	False	False	False	False	False	False	False	False	False	False	False	False	False	False	False	False	False	False	False	False	False
chrI	40869	41020	chrI	40869	41020	putative_enhancer	no_transcription	transcription_initiation	.	.	.	.	.	.	WBGene00022279	sesn-1	41004	41026	41004	41026	False	True	False	False	False	False	False	False	False	False	False	False	False	False	False	False	False	False	False	False	False	False	False	False	False	False	False	False	False
chrI	41422	41573	chrI	41422	41573	putative_enhancer	transcription_initiation	no_transcription	.	.	.	.	.	.	WBGene00022279	sesn-1	41485	41437	41485	41437	True	False	False	False	False	False	False	False	False	False	False	False	False	False	False	False	False	False	False	False	False	False	False	False	False	False	False	False	False
chrI	42126	42277	chrI	42126	42277	coding_promoter	transcription_initiation	coding_promoter	.	.	.	WBGene00022279	sesn-1	protein_coding	.	.	42215	42118	42215	42118	True	True	False	False	False	False	False	False	False	False	False	False	False	False	False	False	False	False	False	False	False	True	False	False	False	False	False	False	False
chrI	42692	42843	chrI	42692	42843	other_element	no_transcription	no_transcription	.	.	.	.	.	.	WBGene00022279	sesn-1	42827	42707	42827	42707	False	False	False	False	False	False	False	False	False	False	False	False	False	False	True	False	False	False	True	False	False	False	False	False	False	False	False	False	False
chrI	43008	43159	chrI	43008	43159	putative_enhancer	transcription_initiation	transcription_initiation	.	.	.	.	.	.	WBGene00022279	sesn-1	43142	42997	43142	42997	True	True	False	False	False	False	False	False	False	False	False	False	False	False	False	False	False	False	False	False	False	False	False	False	False	False	False	False	False
chrI	44817	44968	chrI	44817	44968	other_element	no_transcription	no_transcription	.	.	.	.	.	.	WBGene00022279	sesn-1	44952	44832	44952	44832	False	False	False	False	False	False	False	False	False	False	False	False	False	False	False	False	False	False	False	False	False	False	False	False	False	False	False	False	False
chrI	45122	45273	chrI	45122	45273	other_element	no_transcription	no_transcription	.	.	.	.	.	.	WBGene00022279	sesn-1	45257	45137	45257	45137	False	False	False	False	False	False	False	False	False	False	False	False	False	False	False	False	False	False	False	False	False	False	False	False	False	False	False	False	False
chrI	46405	46556	chrI	46405	46556	putative_enhancer	no_transcription	transcription_initiation	.	.	.	.	.	.	WBGene00022279	sesn-1	46540	46548	46540	46548	False	True	False	False	False	False	False	False	False	False	False	False	False	False	False	False	False	False	False	False	False	False	False	False	False	False	False	False	False
chrI	46676	46827	chrI	46676	46827	putative_enhancer	transcription_initiation	no_transcription	.	.	.	.	.	.	WBGene00022279	sesn-1	46767	46691	46767	46691	True	False	False	False	False	False	False	False	False	False	False	False	False	False	False	False	False	False	False	False	False	False	False	False	False	False	False	False	False
chrI	47053	47204	chrI	47053	47204	coding_promoter	coding_promoter	coding_promoter	WBGene00044345	Y48G1C.12	protein_coding	WBGene00022279	sesn-1	protein_coding	.	.	47177	47084	47177	47084	True	True	False	False	True	False	True	False	False	False	False	False	False	True	True	True	True	True	True	False	False	False	False	True	True	True	True	True	False
chrI	47460	47611	chrI	47460	47611	putative_enhancer	transcription_initiation	transcription_initiation	.	.	.	.	.	.	WBGene00044345	Y48G1C.12	47525	47487	47525	47487	True	True	False	False	False	False	True	True	False	False	False	True	False	False	False	False	False	False	False	False	True	False	False	False	False	False	False	False	False
chrI	56726	56877	chrI	56726	56877	other_element	no_transcription	no_transcription	.	.	.	.	.	.	WBGene00021678	Y48G1C.5	56861	56741	56861	56741	False	False	False	False	False	False	False	False	False	False	False	False	False	False	False	True	False	False	False	False	False	False	False	False	False	False	False	False	False
chrI	65751	65902	chrI	65751	65902	putative_enhancer	transcription_initiation	no_transcription	.	.	.	.	.	.	.	.	65925	65766	65925	65766	True	False	False	False	False	False	False	False	False	False	False	False	False	False	False	False	False	False	False	False	False	False	False	False	False	False	False	False	False
chrI	67780	67931	chrI	67780	67931	putative_enhancer	transcription_initiation	transcription_initiation	.	.	.	.	.	.	.	.	67889	67759	67889	67759	True	True	False	False	False	False	False	False	False	False	False	False	False	False	False	False	False	False	False	False	False	False	False	False	False	False	False	False	False
chrI	70044	70195	chrI	70044	70195	coding_promoter	coding_promoter	transcription_initiation	WBGene00000812	csk-1	protein_coding	.	.	.	.	.	70223	70003	70223	70003	True	True	True	True	True	True	True	True	True	False	False	False	True	False	False	False	False	False	False	True	True	True	False	True	False	False	False	False	False
chrI	71234	71385	chrI	71234	71385	putative_enhancer	transcription_initiation	transcription_initiation	.	.	.	.	.	.	WBGene00000812	csk-1	71361	71266	71361	71266	True	True	False	False	False	False	False	False	False	False	False	False	False	False	False	False	False	False	False	False	False	False	False	False	False	False	False	False	False
chrI	71851	72002	chrI	71851	72002	putative_enhancer	transcription_initiation	transcription_initiation	.	.	.	.	.	.	WBGene00000812	csk-1	71884	71895	71884	71895	True	True	False	False	False	False	False	False	False	False	False	False	False	False	False	False	False	False	False	False	False	False	False	False	False	False	False	False	False
chrI	72362	72513	chrI	72362	72513	coding_promoter	coding_promoter	no_transcription	WBGene00000812	csk-1	protein_coding	.	.	.	.	.	72508	72377	72508	72377	True	False	True	True	True	True	True	True	True	True	True	True	False	False	False	False	False	False	False	False	False	False	False	False	False	False	False	False	False
chrI	74706	74857	chrI	74706	74857	putative_enhancer	transcription_initiation	transcription_initiation	.	.	.	.	.	.	WBGene00000812	csk-1	74867	74701	74867	74701	True	True	False	False	False	False	False	False	False	False	False	False	False	False	False	False	False	False	False	False	False	False	False	False	False	False	False	False	False
chrI	75217	75368	chrI	75217	75368	putative_enhancer	transcription_initiation	transcription_initiation	.	.	.	.	.	.	WBGene00000812	csk-1	75341	75226	75341	75226	True	True	False	False	False	False	False	False	False	False	False	True	False	False	False	False	False	False	False	False	False	False	False	False	False	False	False	False	False
chrI	86364	86515	chrI	86364	86515	coding_promoter	transcription_initiation	coding_promoter	.	.	.	WBGene00021679	Y48G1C.6	protein_coding	.	.	86543	86358	86543	86358	True	True	False	False	False	False	False	False	False	False	False	False	False	False	False	False	False	False	False	False	False	False	False	False	True	True	True	True	True
chrI	90438	90589	chrI	90438	90589	putative_enhancer	no_transcription	transcription_initiation	.	.	.	.	.	.	WBGene00021683	Y48G1C.10	90573	90511	90573	90511	False	True	False	False	False	False	False	False	False	True	False	False	False	False	False	False	False	False	False	False	True	False	False	False	False	False	False	False	False
chrI	91353	91504	chrI	91353	91504	putative_enhancer	transcription_initiation	no_transcription	.	.	.	.	.	.	WBGene00021682	Y48G1C.9	91439	91368	91439	91368	True	False	True	False	False	True	False	True	False	True	True	True	True	False	False	False	False	False	False	False	True	False	False	False	False	False	False	False	False
chrI	91714	91865	chrI	91714	91865	putative_enhancer	transcription_initiation	transcription_initiation	.	.	.	.	.	.	WBGene00021682	Y48G1C.9	91830	91752	91830	91752	True	True	False	False	False	False	False	False	False	False	False	False	False	False	False	False	False	False	False	False	False	False	False	False	False	False	False	False	False
chrI	92221	92372	chrI	92221	92372	putative_enhancer	transcription_initiation	transcription_initiation	.	.	.	.	.	.	WBGene00021682	Y48G1C.9	92351	92245	92351	92245	True	True	True	False	False	False	False	True	False	False	True	True	False	False	False	False	False	False	False	False	False	False	False	False	False	False	False	False	False
chrI	92875	93026	chrI	92875	93026	coding_promoter	coding_promoter	unassigned_promoter	WBGene00021676	Y48G1C.1	protein_coding	.	.	.	.	.	93066	92916	93066	92916	True	True	True	True	True	True	True	True	False	False	False	False	False	False	False	False	False	False	False	False	False	False	False	False	False	False	False	False	True
chrI	96523	96674	chrI	96523	96674	putative_enhancer	transcription_initiation	transcription_initiation	.	.	.	.	.	.	WBGene00021681	Y48G1C.8	96658	96511	96658	96511	True	True	False	False	False	False	False	False	False	False	False	False	False	False	False	False	False	False	False	False	False	False	False	False	False	False	False	False	False
chrI	98075	98226	chrI	98075	98226	putative_enhancer	transcription_initiation	transcription_initiation	.	.	.	.	.	.	WBGene00021681	Y48G1C.8	98164	98103	98164	98103	True	True	False	False	False	False	False	False	False	False	False	False	False	False	True	False	False	False	False	False	False	False	False	True	False	False	False	False	False
chrI	108262	108413	chrI	108262	108413	coding_promoter	transcription_initiation	coding_promoter	.	.	.	WBGene00021681	Y48G1C.8	protein_coding	.	.	108347	108299	108347	108299	True	True	False	False	False	False	False	False	False	False	False	False	False	False	False	False	False	False	False	False	False	False	False	False	True	True	True	True	True
chrI	109603	109754	chrI	109603	109754	putative_enhancer	no_transcription	transcription_initiation	.	.	.	.	.	.	WBGene00004274	rab-11.1	109738	109601	109738	109601	False	True	False	False	False	False	False	False	False	False	False	False	False	True	False	False	False	False	False	False	False	False	False	False	False	False	False	False	False
chrI	110120	110271	chrI	110120	110271	coding_promoter	coding_promoter	coding_promoter	WBGene00004418	rpl-7	protein_coding	WBGene00004274	rab-11.1	protein_coding	.	.	110219	110309	110219	110309	True	True	False	False	False	False	False	False	False	False	False	False	False	False	False	True	False	False	False	False	False	False	False	False	True	True	True	True	True
chrI	110331	110482	chrI	110331	110482	coding_promoter	coding_promoter	coding_promoter	WBGene00004418	rpl-7	protein_coding	WBGene00004274	rab-11.1	protein_coding	.	.	110315	110309	110315	110309	True	True	False	False	False	False	False	False	False	False	False	False	False	False	False	False	False	False	False	False	False	True	False	False	False	False	False	False	False
chrI	110635	110786	chrI	110635	110786	coding_promoter	coding_promoter	coding_promoter	WBGene00004418	rpl-7	protein_coding	WBGene00004274	rab-11.1	protein_coding	.	.	110783	110658	110783	110658	True	True	False	True	True	False	True	True	False	False	False	False	False	False	False	False	False	False	False	False	False	False	False	False	True	True	True	True	True
chrI	111206	111357	chrI	111206	111357	non-coding_RNA	non-coding_RNA	no_transcription	WBGene00023461	F53G12.12	snoRNA	.	.	.	.	.	111337	111221	111337	111221	True	False	False	False	False	False	False	False	False	False	False	False	False	False	False	False	False	False	False	False	False	False	False	False	False	False	False	False	False
chrI	112379	112530	chrI	112379	112530	putative_enhancer	transcription_initiation	no_transcription	.	.	.	.	.	.	WBGene00004418,WBGene00018774	F53G12.9,rpl-7	112355	112394	112355	112394	True	False	False	False	False	False	False	False	False	False	False	False	False	False	False	False	False	False	False	False	False	False	False	False	False	False	False	False	False
chrI	112713	112864	chrI	112713	112864	putative_enhancer	transcription_initiation	no_transcription	.	.	.	.	.	.	WBGene00018774	F53G12.9	112734	112728	112734	112728	True	False	False	False	False	False	False	False	False	False	False	False	False	False	False	False	False	False	False	False	False	False	False	False	False	False	False	False	False
chrI	114694	114845	chrI	114694	114845	putative_enhancer	no_transcription	transcription_initiation	.	.	.	.	.	.	WBGene00018773	F53G12.8	114829	114757	114829	114757	False	True	False	False	False	False	False	False	False	False	False	False	False	False	False	False	False	False	False	False	False	False	False	False	False	False	False	False	False
chrI	122407	122558	chrI	122407	122558	coding_promoter	coding_promoter	no_transcription	WBGene00003229	mex-3	protein_coding	.	.	.	.	.	122534	122422	122534	122422	True	False	False	True	True	False	False	False	False	False	False	False	False	True	True	False	False	False	False	False	False	False	False	False	False	False	False	False	False
chrI	123900	124051	chrI	123900	124051	putative_enhancer	no_transcription	transcription_initiation	.	.	.	.	.	.	WBGene00003229	mex-3	124035	123851	124035	123851	False	True	False	True	False	False	False	False	False	False	False	False	False	False	False	False	False	False	False	False	False	False	False	False	False	False	False	False	False
chrI	124768	124919	chrI	124768	124919	putative_enhancer	transcription_initiation	transcription_initiation	.	.	.	.	.	.	WBGene00003229	mex-3	124842	124741	124842	124741	True	True	False	False	False	False	False	False	False	False	False	False	False	False	False	False	False	False	False	False	False	False	False	False	False	False	False	False	False
chrI	126632	126783	chrI	126632	126783	coding_promoter	coding_promoter	transcription_initiation	WBGene00003229	mex-3	protein_coding	.	.	.	.	.	126790	126654	126790	126654	True	True	False	False	True	False	False	False	False	False	False	False	False	False	False	False	False	False	False	False	False	False	False	False	False	False	False	False	False
chrI	128237	128388	chrI	128237	128388	coding_promoter	coding_promoter	no_transcription	WBGene00003229	mex-3	protein_coding	.	.	.	.	.	128334	128252	128334	128252	True	False	False	False	False	False	True	True	False	False	False	False	False	False	False	False	False	False	True	False	False	False	False	False	False	False	False	False	False
chrI	128403	128554	chrI	128403	128554	coding_promoter	coding_promoter	transcription_initiation	WBGene00003229	mex-3	protein_coding	.	.	.	.	.	128507	128499	128507	128499	True	True	True	True	True	True	True	True	False	False	False	True	True	False	False	False	False	False	False	False	False	False	True	True	False	False	False	False	False
chrI	128676	128827	chrI	128676	128827	putative_enhancer	transcription_initiation	no_transcription	.	.	.	.	.	.	WBGene00003229	mex-3	128764	128691	128764	128691	True	False	True	False	False	True	True	True	False	False	False	False	True	False	False	False	False	False	False	True	False	False	False	True	False	False	False	False	False
chrI	129895	130046	chrI	129895	130046	putative_enhancer	transcription_initiation	transcription_initiation	.	.	.	.	.	.	WBGene00003229	mex-3	129990	129903	129990	129903	True	True	False	False	False	False	False	False	False	False	False	False	False	False	False	False	False	False	False	False	False	False	False	False	False	False	False	False	False
chrI	130436	130587	chrI	130436	130587	putative_enhancer	transcription_initiation	transcription_initiation	.	.	.	.	.	.	WBGene00003229	mex-3	130427	130440	130427	130440	True	True	False	False	False	False	False	False	False	False	False	False	False	False	False	False	False	False	False	False	False	False	False	True	False	False	False	False	False
chrI	130843	130994	chrI	130843	130994	putative_enhancer	transcription_initiation	transcription_initiation	.	.	.	.	.	.	WBGene00003229	mex-3	131002	130921	131002	130921	True	True	False	False	False	False	False	False	False	False	False	False	False	False	False	False	False	False	False	False	False	False	False	False	False	False	False	False	False
chrI	134015	134166	chrI	134015	134166	putative_enhancer	transcription_initiation	no_transcription	.	.	.	.	.	.	WBGene00003229	mex-3	134109	134030	134109	134030	True	False	False	False	False	False	False	False	False	False	False	False	False	False	False	False	False	False	False	False	False	False	False	False	False	False	False	False	False
chrI	134218	134369	chrI	134218	134369	coding_promoter	coding_promoter	transcription_initiation	WBGene00018772	F53G12.4	protein_coding	.	.	.	.	.	134342	134246	134342	134246	True	True	False	False	False	False	False	False	False	False	False	False	False	False	False	False	False	False	False	False	False	False	False	False	False	False	False	False	False
chrI	144716	144867	chrI	144716	144867	other_element	no_transcription	no_transcription	.	.	.	.	.	.	.	.	144851	144731	144851	144731	False	False	False	False	False	False	False	False	False	False	False	False	False	False	False	False	False	False	False	False	False	False	False	False	False	False	False	False	False
chrI	153759	153910	chrI	153759	153910	other_element	no_transcription	no_transcription	.	.	.	.	.	.	WBGene00000253	bli-3	153894	153774	153894	153774	False	False	False	False	False	False	False	False	False	False	False	False	False	False	False	False	False	False	False	False	False	False	False	False	True	True	True	True	True
chrI	154098	154249	chrI	154098	154249	putative_enhancer	transcription_initiation	no_transcription	.	.	.	.	.	.	WBGene00000253	bli-3	154216	154113	154216	154113	True	False	False	False	False	False	False	False	False	False	False	False	False	False	False	False	False	False	False	False	False	False	False	False	False	False	False	False	False
chrI	156031	156182	chrI	156031	156182	other_element	no_transcription	no_transcription	.	.	.	.	.	.	.	.	156166	156046	156166	156046	False	False	False	False	False	False	False	False	False	False	False	False	False	False	False	False	False	True	False	False	False	False	False	False	False	False	False	False	False
chrI	159357	159508	chrI	159357	159508	unassigned_promoter	transcription_initiation	unassigned_promoter	.	.	.	.	.	.	.	.	159458	159369	159458	159369	True	True	False	False	False	False	False	False	False	False	False	False	False	False	False	False	False	False	False	False	False	False	False	False	False	False	True	False	False
chrI	160122	160273	chrI	160122	160273	putative_enhancer	no_transcription	transcription_initiation	.	.	.	.	.	.	WBGene00004225	ptr-11	160257	160164	160257	160164	False	True	False	False	False	False	False	False	False	False	False	False	False	False	False	False	False	False	False	False	False	True	False	True	False	False	False	False	False
chrI	160806	160957	chrI	160806	160957	other_element	no_transcription	no_transcription	.	.	.	.	.	.	WBGene00004225	ptr-11	160941	160821	160941	160821	False	False	False	False	False	False	False	False	False	False	False	False	False	False	False	False	False	False	False	False	False	False	False	False	False	False	False	False	False
chrI	165888	166039	chrI	165888	166039	putative_enhancer	transcription_initiation	transcription_initiation	.	.	.	.	.	.	WBGene00004225	ptr-11	165995	165879	165995	165879	True	True	False	False	False	False	False	False	False	False	False	False	False	False	False	False	False	False	False	False	False	False	False	False	False	False	False	False	False
chrI	166970	167121	chrI	166970	167121	coding_promoter	no_transcription	coding_promoter	.	.	.	WBGene00004225	ptr-11	protein_coding	.	.	167105	166969	167105	166969	False	True	False	False	False	False	False	False	False	False	False	False	False	False	False	False	False	False	False	False	False	False	False	False	False	False	False	True	False
chrI	168012	168163	chrI	168012	168163	other_element	no_transcription	no_transcription	.	.	.	.	.	.	WBGene00004225	ptr-11	168147	168027	168147	168027	False	False	False	False	False	False	False	False	False	False	False	False	False	False	False	False	False	False	False	False	False	False	False	False	False	False	False	False	False
chrI	168681	168832	chrI	168681	168832	putative_enhancer	transcription_initiation	transcription_initiation	.	.	.	.	.	.	WBGene00004225	ptr-11	168748	168793	168748	168793	True	True	False	False	False	False	False	False	False	False	False	False	False	False	False	False	False	False	False	False	False	False	False	False	False	False	False	False	False
chrI	169733	169884	chrI	169733	169884	coding_promoter	coding_promoter	coding_promoter	WBGene00018958	F56C11.6	protein_coding	WBGene00004225	ptr-11	protein_coding	.	.	169851	169722	169851	169722	True	True	False	False	False	False	False	False	False	False	False	False	False	False	False	True	True	False	False	False	False	False	False	False	True	True	True	False	False
chrI	170648	170799	chrI	170648	170799	other_element	no_transcription	no_transcription	.	.	.	.	.	.	WBGene00018958	F56C11.6	170783	170663	170783	170663	False	False	False	False	False	False	False	False	False	False	False	False	False	False	False	False	False	False	False	False	False	False	False	False	False	False	False	False	False
chrI	171122	171273	chrI	171122	171273	coding_promoter	coding_promoter	transcription_initiation	WBGene00018958	F56C11.6	protein_coding	.	.	.	.	.	171205	171154	171205	171154	True	True	False	False	True	False	False	False	False	False	False	False	False	True	False	False	False	True	False	False	False	True	False	False	False	False	False	False	False
chrI	171775	171926	chrI	171775	171926	putative_enhancer	transcription_initiation	transcription_initiation	.	.	.	.	.	.	WBGene00018958	F56C11.6	171943	171830	171943	171830	True	True	False	False	False	False	False	False	False	False	False	False	False	False	False	False	False	False	False	False	False	False	False	False	False	False	False	False	False
chrI	172087	172238	chrI	172087	172238	other_element	no_transcription	no_transcription	.	.	.	.	.	.	WBGene00018958	F56C11.6	172222	172102	172222	172102	False	False	False	False	False	False	False	False	False	False	False	False	False	False	False	False	False	False	False	False	False	False	False	False	False	False	False	False	False
chrI	172376	172527	chrI	172376	172527	coding_promoter	coding_promoter	unassigned_promoter	WBGene00018958	F56C11.6	protein_coding	.	.	.	.	.	172539	172378	172539	172378	True	True	False	False	False	False	False	False	False	False	True	False	False	False	False	False	False	False	False	False	False	False	False	False	False	False	False	False	False
chrI	172819	172970	chrI	172819	172970	putative_enhancer	transcription_initiation	transcription_initiation	.	.	.	.	.	.	WBGene00018958	F56C11.6	172992	172970	172992	172970	True	True	False	False	False	False	False	False	False	False	False	False	False	False	False	False	False	False	False	False	False	False	False	False	False	False	False	False	False
chrI	173207	173358	chrI	173207	173358	coding_promoter	coding_promoter	transcription_initiation	WBGene00018958	F56C11.6	protein_coding	.	.	.	.	.	173301	173244	173301	173244	True	True	False	True	False	True	True	True	True	True	True	True	True	False	False	False	False	False	False	False	False	False	False	False	False	False	False	False	False
chrI	176780	176931	chrI	176780	176931	other_element	no_transcription	no_transcription	.	.	.	.	.	.	.	.	176915	176795	176915	176795	False	False	False	False	False	False	False	False	False	False	False	False	False	False	False	False	False	False	False	False	False	False	False	False	False	False	False	False	False
chrI	177363	177514	chrI	177363	177514	coding_promoter	coding_promoter	transcription_initiation	WBGene00018957	F56C11.5	protein_coding	.	.	.	.	.	177500	177341	177500	177341	True	True	True	False	False	True	True	True	False	False	False	False	False	True	False	True	True	False	True	False	False	True	True	False	False	False	False	False	False
chrI	178073	178224	chrI	178073	178224	other_element	no_transcription	no_transcription	.	.	.	.	.	.	WBGene00018957	F56C11.5	178208	178088	178208	178088	False	False	False	False	False	False	False	False	False	False	False	False	False	False	False	False	False	False	False	False	False	False	False	False	False	False	False	False	False
chrI	178419	178570	chrI	178419	178570	putative_enhancer	transcription_initiation	transcription_initiation	.	.	.	.	.	.	WBGene00018957	F56C11.5	178566	178455	178566	178455	True	True	True	False	False	False	False	False	False	False	False	False	False	False	False	False	False	False	False	False	False	False	False	False	False	False	False	False	False
chrI	179271	179422	chrI	179271	179422	putative_enhancer	transcription_initiation	transcription_initiation	.	.	.	.	.	.	WBGene00018957	F56C11.5	179404	179291	179404	179291	True	True	False	False	False	False	False	False	False	False	False	False	False	False	False	False	False	False	False	False	False	False	False	False	False	False	False	False	False
chrI	180176	180327	chrI	180176	180327	coding_promoter	coding_promoter	transcription_initiation	WBGene00018957	F56C11.5	protein_coding	.	.	.	.	.	180311	180187	180311	180187	True	True	False	True	True	False	False	True	True	False	True	True	False	False	False	False	False	False	False	True	False	True	True	False	False	False	False	False	False
chrI	182144	182295	chrI	182144	182295	putative_enhancer	no_transcription	transcription_initiation	.	.	.	.	.	.	WBGene00018955,WBGene00018957	F56C11.3,F56C11.5	182279	182135	182279	182135	False	True	False	False	False	False	False	False	False	False	False	False	False	False	False	False	False	False	False	False	False	False	False	False	False	False	False	False	False
chrI	182927	183078	chrI	182927	183078	coding_promoter	coding_promoter	coding_promoter	WBGene00000227	atm-1	protein_coding	WBGene00018955	F56C11.3	protein_coding	.	.	183042	182945	183042	182945	True	True	False	False	True	False	True	True	False	False	False	False	False	False	False	False	False	False	False	False	False	False	False	False	True	True	True	True	True
chrI	183261	183412	chrI	183261	183412	coding_promoter	coding_promoter	coding_promoter	WBGene00000227	atm-1	protein_coding	WBGene00018955	F56C11.3	protein_coding	.	.	183324	183295	183324	183295	True	True	True	True	True	True	True	True	True	False	False	True	True	False	False	False	False	False	False	False	False	False	True	False	False	False	True	False	False
chrI	183416	183567	chrI	183416	183567	putative_enhancer	transcription_initiation	no_transcription	.	.	.	.	.	.	WBGene00000227	atm-1	183371	183431	183371	183431	True	False	False	False	False	False	False	False	False	False	False	False	False	False	False	False	False	False	False	False	False	False	False	False	False	False	False	False	False
chrI	184785	184936	chrI	184785	184936	putative_enhancer	no_transcription	transcription_initiation	.	.	.	.	.	.	WBGene00000227	atm-1	184920	184838	184920	184838	False	True	False	False	False	False	False	False	False	False	False	False	False	False	False	False	False	False	False	False	False	False	False	False	False	False	False	False	False
chrI	188566	188717	chrI	188566	188717	other_element	no_transcription	no_transcription	.	.	.	.	.	.	WBGene00000227	atm-1	188701	188581	188701	188581	False	False	False	False	False	False	False	False	False	False	False	False	False	False	False	False	False	False	False	False	False	False	False	False	False	False	False	False	False
chrI	196825	196976	chrI	196825	196976	other_element	no_transcription	no_transcription	.	.	.	.	.	.	WBGene00000227	atm-1	196960	196840	196960	196840	False	False	False	False	False	False	False	False	False	False	False	False	False	False	False	False	False	False	False	False	False	False	False	False	False	False	False	False	False
chrI	202163	202314	chrI	202163	202314	putative_enhancer	no_transcription	transcription_initiation	.	.	.	.	.	.	WBGene00000227	atm-1	202298	202205	202298	202205	False	True	False	False	False	False	False	False	False	False	False	False	False	False	False	False	False	False	False	False	False	False	False	False	False	False	False	False	False
chrI	204401	204552	chrI	204401	204552	putative_enhancer	transcription_initiation	no_transcription	.	.	.	.	.	.	WBGene00000227	atm-1	204402	204416	204402	204416	True	False	False	False	False	False	False	False	False	False	False	False	False	False	False	False	False	False	False	False	False	False	False	False	False	False	False	False	False
chrI	206007	206158	chrI	206007	206158	other_element	no_transcription	no_transcription	.	.	.	.	.	.	WBGene00000227	atm-1	206142	206022	206142	206022	False	False	False	False	False	False	False	False	False	False	False	False	False	False	False	False	False	False	False	False	False	False	False	False	False	False	False	False	False
chrI	215667	215818	chrI	215667	215818	other_element	no_transcription	no_transcription	.	.	.	.	.	.	WBGene00004246	puf-10	215802	215682	215802	215682	False	False	False	False	False	False	False	False	False	False	False	False	False	False	False	False	False	False	False	False	False	False	False	False	False	False	False	False	True
chrI	215836	215987	chrI	215836	215987	coding_promoter	coding_promoter	no_transcription	WBGene00021662	snpc-3.3	protein_coding	.	.	.	.	.	216004	215851	216004	215851	True	False	True	True	True	True	True	True	False	False	False	False	False	True	True	True	False	True	True	False	False	False	False	False	False	False	False	False	False
chrI	217734	217885	chrI	217734	217885	coding_promoter	coding_promoter	pseudogene_promoter	WBGene00255594	Y48G1BL.8	protein_coding	WBGene00004246	puf-10	pseudogene	.	.	217888	217779	217888	217779	True	True	False	False	False	False	False	False	False	False	False	False	False	False	False	False	False	False	False	False	False	False	False	False	True	True	True	True	True
chrI	226835	226986	chrI	226835	226986	other_element	no_transcription	no_transcription	.	.	.	.	.	.	.	.	226970	226850	226970	226850	False	False	False	False	False	False	False	False	False	False	False	False	False	False	False	False	False	False	False	False	False	False	False	False	False	False	False	False	False
chrI	230511	230662	chrI	230511	230662	putative_enhancer	transcription_initiation	no_transcription	.	.	.	.	.	.	.	.	230557	230526	230557	230526	True	False	False	False	False	False	False	False	False	False	False	False	False	False	False	False	False	False	False	False	False	False	False	False	False	False	False	False	False
chrI	231335	231486	chrI	231335	231486	putative_enhancer	transcription_initiation	transcription_initiation	.	.	.	.	.	.	.	.	231353	231364	231353	231364	True	True	False	False	False	False	False	False	False	False	False	False	False	False	False	False	False	False	False	False	False	False	False	False	False	False	False	False	False
chrI	231966	232117	chrI	231966	232117	putative_enhancer	transcription_initiation	no_transcription	.	.	.	.	.	.	WBGene00021671	Y48G1BM.6	232157	231981	232157	231981	True	False	False	False	False	False	False	False	False	False	False	False	False	False	False	False	False	False	False	False	False	False	False	False	False	False	False	False	False
chrI	232644	232795	chrI	232644	232795	putative_enhancer	transcription_initiation	transcription_initiation	.	.	.	.	.	.	WBGene00021671	Y48G1BM.6	232642	232771	232642	232771	True	True	False	False	False	False	False	False	False	False	False	False	False	False	False	False	False	False	False	False	False	False	False	False	False	False	False	False	False
chrI	237724	237875	chrI	237724	237875	other_element	no_transcription	no_transcription	.	.	.	.	.	.	WBGene00021671	Y48G1BM.6	237859	237739	237859	237739	False	False	True	True	True	True	True	True	True	True	True	True	True	False	False	True	True	True	True	True	True	True	True	True	False	False	False	False	False
chrI	238032	238183	chrI	238032	238183	putative_enhancer	transcription_initiation	no_transcription	.	.	.	.	.	.	WBGene00021671	Y48G1BM.6	238115	238047	238115	238047	True	False	False	False	False	False	False	False	False	False	False	False	False	False	False	False	False	False	False	False	False	False	False	False	False	False	False	False	True
chrI	238435	238586	chrI	238435	238586	putative_enhancer	transcription_initiation	no_transcription	.	.	.	.	.	.	.	.	238495	238450	238495	238450	True	False	False	False	False	False	False	False	False	False	False	False	False	False	False	False	False	False	False	False	False	False	False	False	False	False	False	False	False
chrI	240340	240491	chrI	240340	240491	pseudogene_promoter	pseudogene_promoter	transcription_initiation	WBGene00021668	Y48G1BM.2	pseudogene	.	.	.	.	.	240458	240324	240458	240324	True	True	False	False	False	False	False	False	False	False	False	False	False	False	True	False	False	False	False	False	False	False	False	False	False	False	False	False	False
chrI	240779	240930	chrI	240779	240930	other_element	no_transcription	no_transcription	.	.	.	.	.	.	WBGene00021668	Y48G1BM.2	240914	240794	240914	240794	False	False	False	False	False	False	False	False	False	False	False	False	False	False	False	False	False	False	False	False	False	False	False	False	False	False	False	False	False
chrI	251745	251896	chrI	251745	251896	pseudogene_promoter	no_transcription	pseudogene_promoter	.	.	.	WBGene00021673	Y48G1BM.8	pseudogene	.	.	251880	251728	251880	251728	False	True	False	False	False	False	False	False	False	False	False	False	False	False	False	False	False	False	False	False	False	False	False	False	True	True	True	True	True
chrI	251910	252061	chrI	251910	252061	coding_promoter	coding_promoter	pseudogene_promoter	WBGene00021667	snpc-3.2	protein_coding	WBGene00021673	Y48G1BM.8	pseudogene	.	.	252091	251955	252091	251955	True	True	True	True	True	True	True	True	False	False	False	False	False	True	True	True	True	False	False	False	False	False	False	False	False	False	False	False	False
chrI	257942	258093	chrI	257942	258093	putative_enhancer	transcription_initiation	no_transcription	.	.	.	.	.	.	WBGene00021675	Y48G1BR.1	258087	257957	258087	257957	True	False	False	False	False	False	False	False	False	False	False	False	False	False	False	False	False	False	False	False	False	False	False	False	False	False	False	False	False
chrI	258518	258669	chrI	258518	258669	putative_enhancer	transcription_initiation	no_transcription	.	.	.	.	.	.	WBGene00021675	Y48G1BR.1	258594	258533	258594	258533	True	False	False	False	False	False	False	False	False	False	False	False	False	False	False	False	False	False	False	False	False	False	False	False	False	False	False	False	False
chrI	260242	260393	chrI	260242	260393	other_element	no_transcription	no_transcription	.	.	.	.	.	.	WBGene00021675	Y48G1BR.1	260377	260257	260377	260257	False	False	False	False	False	False	False	False	False	False	False	False	False	True	False	False	False	False	False	False	False	False	False	False	False	False	False	False	False
chrI	260864	261015	chrI	260864	261015	other_element	no_transcription	no_transcription	.	.	.	.	.	.	WBGene00021675	Y48G1BR.1	260999	260879	260999	260879	False	False	False	False	False	False	False	False	False	False	False	False	False	False	False	True	False	False	False	False	False	False	False	False	False	False	False	False	False
chrI	262026	262177	chrI	262026	262177	unassigned_promoter	no_transcription	unassigned_promoter	.	.	.	.	.	.	WBGene00021675	Y48G1BR.1	262161	262010	262161	262010	False	True	False	False	False	False	False	False	False	False	False	False	False	False	False	False	False	False	False	False	False	False	False	False	False	False	False	False	False
chrI	262814	262965	chrI	262814	262965	other_element	no_transcription	no_transcription	.	.	.	.	.	.	WBGene00021675	Y48G1BR.1	262949	262829	262949	262829	False	False	False	False	False	False	False	False	False	False	False	False	False	False	False	False	False	False	False	False	False	False	False	False	False	False	False	False	False
chrI	267240	267391	chrI	267240	267391	coding_promoter	no_transcription	coding_promoter	.	.	.	WBGene00021675	Y48G1BR.1	protein_coding	.	.	267375	267253	267375	267253	False	True	False	False	False	False	False	False	False	False	False	False	False	False	False	False	False	False	False	False	False	False	False	False	False	False	True	False	False
chrI	268137	268288	chrI	268137	268288	other_element	no_transcription	no_transcription	.	.	.	.	.	.	.	.	268272	268152	268272	268152	False	False	False	False	False	False	False	False	False	False	False	False	False	False	False	False	False	False	False	False	False	False	False	False	False	False	False	False	False
chrI	270330	270481	chrI	270330	270481	putative_enhancer	transcription_initiation	transcription_initiation	.	.	.	.	.	.	.	.	270521	270333	270521	270333	True	True	False	False	False	False	False	False	False	False	False	False	False	False	False	False	False	False	False	False	False	False	False	False	False	False	False	False	False
chrI	270973	271124	chrI	270973	271124	putative_enhancer	transcription_initiation	transcription_initiation	.	.	.	.	.	.	.	.	271103	271151	271103	271151	True	True	False	False	False	False	False	False	False	False	False	False	False	False	False	False	False	False	False	False	False	False	False	False	False	False	False	False	False
chrI	272558	272709	chrI	272558	272709	putative_enhancer	transcription_initiation	transcription_initiation	.	.	.	.	.	.	.	.	272704	272624	272704	272624	True	True	False	False	False	False	False	False	False	False	False	False	False	False	False	False	False	False	False	False	False	False	False	False	False	False	False	False	False
chrI	273598	273749	chrI	273598	273749	other_element	no_transcription	no_transcription	.	.	.	.	.	.	.	.	273733	273613	273733	273613	False	False	False	False	False	False	False	False	False	False	False	False	False	False	False	False	False	False	False	False	False	False	False	False	False	False	False	False	False
chrI	274470	274621	chrI	274470	274621	putative_enhancer	no_transcription	transcription_initiation	.	.	.	.	.	.	.	.	274605	274511	274605	274511	False	True	False	False	False	False	False	False	False	False	False	False	False	False	False	False	False	False	False	False	True	False	False	False	False	False	False	False	False
chrI	275718	275869	chrI	275718	275869	putative_enhancer	transcription_initiation	transcription_initiation	.	.	.	.	.	.	.	.	275874	275756	275874	275756	True	True	False	False	False	False	False	False	False	False	False	False	False	False	False	False	False	False	False	True	False	False	False	False	False	False	False	False	False
chrI	276570	276721	chrI	276570	276721	putative_enhancer	transcription_initiation	transcription_initiation	.	.	.	.	.	.	.	.	276688	276570	276688	276570	True	True	False	False	False	False	False	False	False	False	False	False	False	False	False	False	False	False	False	False	False	False	False	False	False	False	False	False	False
chrI	277106	277257	chrI	277106	277257	coding_promoter	coding_promoter	transcription_initiation	WBGene00016904	C53D5.3	protein_coding	.	.	.	.	.	277272	277127	277272	277127	True	True	False	False	False	False	False	True	False	False	False	True	False	False	False	False	False	False	True	False	False	False	True	False	False	False	False	False	False
chrI	278092	278243	chrI	278092	278243	unassigned_promoter	transcription_initiation	unassigned_promoter	.	.	.	.	.	.	WBGene00016904	C53D5.3	278176	278095	278176	278095	True	True	False	False	False	False	False	False	False	False	False	False	False	False	False	False	False	False	False	False	False	False	False	False	False	False	True	False	False
chrI	279892	280043	chrI	279892	280043	coding_promoter	coding_promoter	no_transcription	WBGene00016904	C53D5.3	protein_coding	.	.	.	.	.	280020	279907	280020	279907	True	False	True	True	True	True	True	False	False	True	False	False	False	False	False	False	False	False	False	False	True	False	False	False	False	False	False	False	False
chrI	280353	280504	chrI	280353	280504	other_element	no_transcription	no_transcription	.	.	.	.	.	.	WBGene00016904	C53D5.3	280488	280368	280488	280368	False	False	False	False	False	False	False	False	False	False	False	False	False	False	False	False	False	False	False	False	False	False	False	False	False	False	False	False	False
chrI	282027	282178	chrI	282027	282178	coding_promoter	coding_promoter	no_transcription	WBGene00016903	marc-4	protein_coding	.	.	.	.	.	282162	282042	282162	282042	False	False	False	False	False	False	False	False	False	False	False	False	False	False	False	False	False	False	False	False	True	False	False	False	False	False	False	False	False
chrI	287791	287942	chrI	287791	287942	other_element	no_transcription	no_transcription	.	.	.	.	.	.	WBGene00016905	ztf-3	287926	287806	287926	287806	False	False	False	False	False	False	False	False	False	False	False	False	False	False	False	False	False	False	False	False	False	False	False	False	False	False	False	False	False
chrI	288130	288281	chrI	288130	288281	other_element	no_transcription	no_transcription	.	.	.	.	.	.	WBGene00016905	ztf-3	288265	288145	288265	288145	False	False	False	False	False	False	False	False	False	False	False	False	False	False	False	False	False	False	False	False	False	False	False	False	True	True	False	False	True
chrI	289111	289262	chrI	289110	289261	coding_promoter	coding_promoter	coding_promoter	WBGene00016902	C53D5.1	protein_coding	WBGene00016905	ztf-3	protein_coding	.	.	289198	289097	289197	289096	True	True	True	False	True	False	False	False	False	False	False	False	False	True	False	False	False	False	False	False	False	True	False	False	True	True	True	True	True
chrI	290377	290528	chrI	290376	290527	putative_enhancer	transcription_initiation	transcription_initiation	.	.	.	.	.	.	WBGene00016902	C53D5.1	290482	290425	290481	290424	True	True	False	False	False	False	False	False	False	False	False	False	False	False	False	False	False	False	False	False	False	False	False	False	False	False	False	False	False
chrI	293197	293348	chrI	293196	293347	coding_promoter	coding_promoter	transcription_initiation	WBGene00016902	C53D5.1	protein_coding	.	.	.	.	.	293340	293152	293339	293151	True	True	True	False	False	False	False	False	False	False	False	False	False	False	False	False	False	False	False	False	False	False	False	False	False	False	False	False	False
chrI	295960	296111	chrI	295959	296110	putative_enhancer	transcription_initiation	transcription_initiation	.	.	.	.	.	.	WBGene00016902	C53D5.1	296039	295916	296038	295915	True	True	False	False	False	False	False	False	False	False	False	False	False	False	False	False	False	False	False	False	False	False	False	False	False	False	False	False	False
chrI	296237	296388	chrI	296236	296387	putative_enhancer	transcription_initiation	transcription_initiation	.	.	.	.	.	.	WBGene00016902	C53D5.1	296226	296212	296225	296211	True	True	False	False	False	False	False	False	False	False	False	False	False	False	False	False	False	False	False	False	False	False	False	False	False	False	False	False	False
chrI	297434	297585	chrI	297433	297584	putative_enhancer	transcription_initiation	transcription_initiation	.	.	.	.	.	.	WBGene00016902	C53D5.1	297571	297524	297570	297523	True	True	False	False	False	False	False	False	False	False	False	False	False	False	False	False	False	False	False	False	False	False	False	False	False	False	False	False	False
chrI	297619	297770	chrI	297618	297769	putative_enhancer	transcription_initiation	transcription_initiation	.	.	.	.	.	.	WBGene00016902	C53D5.1	297775	297668	297774	297667	True	True	False	False	False	False	False	False	False	False	False	False	False	False	False	False	False	False	False	False	False	False	False	False	False	False	False	False	False
chrI	298430	298581	chrI	298429	298580	putative_enhancer	transcription_initiation	transcription_initiation	.	.	.	.	.	.	WBGene00016902	C53D5.1	298587	298624	298586	298623	True	True	False	False	False	False	False	False	False	False	False	False	False	False	False	False	False	False	False	False	False	False	False	False	False	False	False	False	False
chrI	299772	299923	chrI	299771	299922	putative_enhancer	transcription_initiation	transcription_initiation	.	.	.	.	.	.	WBGene00016902	C53D5.1	299892	299783	299891	299782	True	True	False	False	False	False	False	False	False	False	False	False	False	False	False	False	False	False	False	False	False	True	False	False	False	False	False	False	False
chrI	300739	300890	chrI	300738	300889	putative_enhancer	transcription_initiation	no_transcription	.	.	.	.	.	.	WBGene00016902	C53D5.1	300838	300754	300837	300753	True	False	False	False	False	False	False	False	False	False	False	False	False	False	False	False	False	False	False	False	True	False	False	False	False	False	False	False	False
chrI	301309	301460	chrI	301308	301459	putative_enhancer	transcription_initiation	transcription_initiation	.	.	.	.	.	.	WBGene00016902	C53D5.1	301400	301496	301399	301495	True	True	False	False	False	False	False	False	False	False	False	False	False	False	False	False	False	False	False	False	False	False	False	False	False	False	False	False	False
chrI	301548	301699	chrI	301547	301698	other_element	no_transcription	no_transcription	.	.	.	.	.	.	WBGene00016902	C53D5.1	301683	301563	301682	301562	False	False	False	False	False	False	False	False	False	False	False	False	False	False	False	False	False	False	False	False	False	False	False	False	False	False	False	False	False
chrI	302102	302253	chrI	302101	302252	coding_promoter	coding_promoter	no_transcription	WBGene00016902	C53D5.1	protein_coding	.	.	.	.	.	302188	302117	302187	302116	True	False	False	False	False	False	False	False	True	False	False	False	False	False	False	False	False	False	False	False	False	False	False	False	False	False	False	False	False
chrI	305684	305835	chrI	305683	305834	other_element	no_transcription	no_transcription	.	.	.	.	.	.	WBGene00016906	C53D5.5	305819	305699	305818	305698	False	False	False	False	False	False	False	False	False	False	False	False	False	False	False	False	False	False	False	False	False	False	False	False	False	False	False	False	False
chrI	305916	306067	chrI	305915	306066	putative_enhancer	transcription_initiation	no_transcription	.	.	.	.	.	.	WBGene00016906	C53D5.5	306015	305931	306014	305930	True	False	False	False	False	False	False	False	False	False	False	False	False	False	False	False	False	False	False	False	False	False	False	False	False	False	False	False	False
chrI	308035	308186	chrI	308034	308185	putative_enhancer	transcription_initiation	no_transcription	.	.	.	.	.	.	WBGene00016906	C53D5.5	308075	308050	308074	308049	True	False	False	False	False	False	False	False	False	False	False	False	False	False	False	False	False	False	False	False	False	False	False	False	False	False	False	False	False
chrI	308884	309035	chrI	308883	309034	other_element	no_transcription	no_transcription	.	.	.	.	.	.	WBGene00016906	C53D5.5	309019	308899	309018	308898	False	False	False	False	False	False	False	False	False	False	False	False	False	False	False	False	False	False	False	False	False	False	False	False	True	False	False	True	True
chrI	310902	311053	chrI	310901	311052	putative_enhancer	transcription_initiation	transcription_initiation	.	.	.	.	.	.	WBGene00002077,WBGene00016906	C53D5.5,imb-3	311070	310863	311069	310862	True	True	False	False	False	False	False	False	False	False	False	False	False	True	False	False	False	False	False	False	False	False	True	False	False	False	False	False	False
chrI	311293	311444	chrI	311292	311443	putative_enhancer	transcription_initiation	transcription_initiation	.	.	.	.	.	.	WBGene00002077	imb-3	311450	311401	311449	311400	True	True	False	False	False	False	False	False	False	False	False	False	False	False	False	False	False	False	False	False	False	False	False	False	False	False	False	False	False
chrI	314281	314432	chrI	314280	314431	putative_enhancer	no_transcription	transcription_initiation	.	.	.	.	.	.	WBGene00002077	imb-3	314416	314323	314415	314322	False	True	False	False	False	False	False	False	False	False	False	False	False	False	False	False	True	False	False	False	False	False	False	True	False	False	False	False	False
chrI	315227	315378	chrI	315226	315377	coding_promoter	unassigned_promoter	coding_promoter	.	.	.	WBGene00002077	imb-3	protein_coding	.	.	315361	315216	315360	315215	True	True	False	False	False	False	False	False	False	False	False	False	True	False	False	False	False	False	False	False	False	False	False	True	False	False	False	False	True
chrI	315487	315638	chrI	315486	315637	putative_enhancer	transcription_initiation	transcription_initiation	.	.	.	.	.	.	.	.	315464	315521	315463	315520	True	True	False	False	False	False	False	False	False	False	False	False	False	False	False	False	False	False	False	False	False	False	False	False	False	False	False	False	False
chrI	316147	316298	chrI	316146	316297	putative_enhancer	transcription_initiation	transcription_initiation	.	.	.	.	.	.	.	.	316228	316156	316227	316155	True	True	False	False	False	False	False	False	False	False	False	False	False	False	False	False	False	False	False	False	False	False	False	False	False	False	False	False	False
chrI	316681	316832	chrI	316680	316831	other_element	no_transcription	no_transcription	.	.	.	.	.	.	WBGene00235385	Y48G1A.7	316816	316696	316815	316695	False	False	False	False	False	False	False	False	False	False	False	False	False	False	False	False	False	False	False	False	False	False	False	False	False	False	False	False	False
chrI	318178	318329	chrI	318177	318328	putative_enhancer	transcription_initiation	no_transcription	.	.	.	.	.	.	WBGene00235385	Y48G1A.7	318262	318193	318261	318192	True	False	False	False	False	False	False	False	False	False	False	False	False	False	False	False	False	False	False	False	False	False	False	False	False	False	False	False	False
chrI	321003	321154	chrI	321002	321153	coding_promoter	coding_promoter	transcription_initiation	WBGene00021660	Y48G1A.4	protein_coding	.	.	.	.	.	321135	320980	321134	320979	True	True	False	True	False	False	False	False	False	False	False	False	False	False	True	False	False	True	False	False	False	False	False	True	False	False	False	False	False
chrI	323569	323720	chrI	323568	323719	coding_promoter	coding_promoter	coding_promoter	WBGene00021660	Y48G1A.4	protein_coding	WBGene00002079	xpo-2	protein_coding	.	.	323598	323519	323597	323518	True	True	True	True	True	True	True	True	False	True	False	True	True	False	False	True	True	False	True	False	True	False	False	False	False	True	False	True	True
chrI	335039	335190	chrI	335038	335189	other_element	no_transcription	no_transcription	.	.	.	.	.	.	WBGene00000917	daf-25	335174	335054	335173	335053	False	False	False	False	False	False	False	False	False	False	False	False	False	False	False	True	False	False	False	False	False	False	False	False	False	False	False	False	False
chrI	342946	343097	chrI	342943	343094	putative_enhancer	transcription_initiation	transcription_initiation	.	.	.	.	.	.	WBGene00021661	mbtr-1	343067	342959	343064	342956	True	True	False	False	False	False	False	False	False	False	False	False	False	False	True	False	True	False	False	False	False	False	False	False	False	False	False	False	False
chrI	347231	347382	chrI	347228	347379	coding_promoter	coding_promoter	coding_promoter	WBGene00021658	Y48G1A.2	protein_coding	WBGene00021661	mbtr-1	protein_coding	.	.	347366	347183	347363	347180	False	True	True	True	True	True	True	True	False	False	False	False	False	True	True	True	True	True	False	False	False	False	False	False	False	False	False	False	False
chrI	347475	347626	chrI	347472	347623	coding_promoter	coding_promoter	transcription_initiation	WBGene00021658	Y48G1A.2	protein_coding	.	.	.	.	.	347508	347545	347505	347542	True	True	True	True	True	False	True	True	False	False	False	False	False	False	True	False	False	False	False	False	False	False	False	False	False	False	False	False	False
chrI	348358	348509	chrI	348355	348506	coding_promoter	coding_promoter	coding_promoter	WBGene00021657	Y48G1A.1	protein_coding	WBGene00021661	mbtr-1	protein_coding	.	.	348522	348381	348519	348378	True	True	False	True	True	True	True	False	False	False	True	True	True	False	False	False	False	False	False	False	False	True	True	True	False	False	True	True	False
chrI	354499	354650	chrI	354496	354647	other_element	no_transcription	no_transcription	.	.	.	.	.	.	WBGene00021657	Y48G1A.1	354634	354514	354631	354511	False	False	False	False	False	False	False	False	False	False	False	False	False	False	False	False	False	False	False	False	False	False	False	False	False	False	False	False	False
chrI	363984	364135	chrI	363981	364132	pseudogene_promoter	no_transcription	pseudogene_promoter	.	.	.	WBGene00020087	R119.1	pseudogene	.	.	364119	363999	364116	363996	False	False	False	False	False	False	False	False	False	False	False	False	False	False	False	False	False	False	False	False	False	False	False	False	True	True	True	True	True
chrI	364271	364422	chrI	364268	364419	coding_promoter	coding_promoter	transcription_initiation	WBGene00020091	rnp-8	protein_coding	.	.	.	.	.	364354	364262	364351	364259	True	True	True	True	True	True	True	True	False	False	False	False	False	False	True	False	False	False	True	False	False	False	False	False	False	False	False	False	False
chrI	377324	377475	chrI	377321	377472	putative_enhancer	transcription_initiation	no_transcription	.	.	.	.	.	.	WBGene00020089	R119.3	377456	377339	377453	377336	True	False	False	False	False	False	False	False	False	False	False	False	False	False	False	False	False	False	False	False	False	False	False	False	False	False	False	False	False
chrI	378953	379104	chrI	378950	379101	putative_enhancer	transcription_initiation	transcription_initiation	.	.	.	.	.	.	WBGene00004143,WBGene00020089	R119.3,pqn-59	379132	378946	379129	378943	True	True	False	False	False	False	False	False	False	False	False	False	False	True	False	False	True	False	False	False	False	False	False	False	False	False	False	False	False
chrI	381581	381732	chrI	381578	381729	putative_enhancer	transcription_initiation	transcription_initiation	.	.	.	.	.	.	WBGene00004143	pqn-59	381772	381657	381769	381654	True	True	False	False	False	False	False	False	False	False	False	False	False	False	False	True	False	True	False	False	False	False	False	True	False	False	False	False	False
chrI	381912	382063	chrI	381909	382060	putative_enhancer	transcription_initiation	transcription_initiation	.	.	.	.	.	.	WBGene00004143	pqn-59	382010	381866	382007	381863	True	True	False	False	False	False	False	False	False	False	False	False	False	False	False	False	False	False	False	False	False	False	False	False	True	True	True	True	True
chrI	382446	382597	chrI	382443	382594	coding_promoter	coding_promoter	coding_promoter	WBGene00006385	taf-4	protein_coding	WBGene00004143	pqn-59	protein_coding	.	.	382589	382439	382586	382436	True	True	True	True	True	True	True	True	True	True	True	True	True	False	False	False	False	True	True	False	False	True	True	True	True	True	True	True	True
chrI	382794	382945	chrI	382791	382942	putative_enhancer	transcription_initiation	no_transcription	.	.	.	.	.	.	WBGene00006385	taf-4	382773	382809	382770	382806	True	False	False	False	False	False	False	False	False	False	False	False	False	False	False	False	False	False	False	False	False	False	False	False	False	False	False	False	False
chrI	389663	389814	chrI	389660	389811	putative_enhancer	transcription_initiation	no_transcription	.	.	.	.	.	.	WBGene00020090	R119.5	389785	389678	389782	389675	True	False	False	False	False	False	False	False	False	False	False	False	False	False	False	False	False	False	False	False	False	False	False	False	False	False	False	False	False
chrI	390631	390782	chrI	390628	390779	other_element	no_transcription	no_transcription	.	.	.	.	.	.	WBGene00020090	R119.5	390766	390646	390763	390643	False	False	False	False	False	False	False	False	False	False	False	False	False	False	False	False	False	False	False	False	False	False	False	False	True	True	True	True	True
chrI	395264	395415	chrI	395261	395412	coding_promoter	transcription_initiation	coding_promoter	.	.	.	WBGene00020090	R119.5	protein_coding	.	.	395433	395258	395430	395255	True	True	False	False	False	False	False	False	False	False	False	False	False	False	False	False	False	False	False	False	False	False	False	False	True	True	True	True	True
chrI	395972	396123	chrI	395969	396120	putative_enhancer	transcription_initiation	no_transcription	.	.	.	.	.	.	.	.	396120	395987	396117	395984	True	False	False	False	False	False	False	False	False	False	False	False	False	False	False	False	False	False	False	False	False	False	False	False	False	False	False	False	False
chrI	397844	397995	chrI	397841	397992	coding_promoter	coding_promoter	transcription_initiation	WBGene00021733	otub-2	protein_coding	.	.	.	.	.	397967	397831	397964	397828	True	True	True	True	False	False	True	False	False	False	False	False	False	False	False	False	False	False	False	False	False	False	False	False	False	False	False	False	False
chrI	398466	398617	chrI	398463	398614	coding_promoter	coding_promoter	transcription_initiation	WBGene00021733	otub-2	protein_coding	.	.	.	.	.	398577	398481	398574	398478	True	True	False	False	False	False	False	True	False	False	False	False	False	False	False	False	False	False	False	False	False	False	False	False	False	False	False	False	False
chrI	400529	400680	chrI	400526	400677	putative_enhancer	no_transcription	transcription_initiation	.	.	.	.	.	.	WBGene00021733	otub-2	400664	400694	400661	400691	False	True	False	False	False	False	False	False	False	False	False	False	False	False	False	False	False	False	False	False	True	False	False	False	False	False	False	False	False
chrI	414422	414573	chrI	414419	414570	putative_enhancer	no_transcription	transcription_initiation	.	.	.	.	.	.	WBGene00021734	Y50C1A.2	414557	414543	414554	414540	False	True	False	False	False	False	False	False	False	False	False	False	False	False	False	False	False	False	False	False	False	False	False	False	False	False	False	False	False
chrI	418846	418997	chrI	418843	418994	coding_promoter	no_transcription	coding_promoter	.	.	.	WBGene00021734	Y50C1A.2	protein_coding	.	.	418981	418894	418978	418891	False	True	False	False	False	False	False	False	False	False	False	False	False	False	False	False	False	False	False	False	False	False	False	False	True	True	True	False	False
chrI	419191	419342	chrI	419188	419339	other_element	no_transcription	no_transcription	.	.	.	.	.	.	.	.	419326	419206	419323	419203	False	False	False	False	False	False	False	False	False	False	False	False	False	False	False	False	False	False	False	False	False	False	False	False	False	False	False	False	False
chrI	424601	424752	chrI	424598	424749	putative_enhancer	no_transcription	transcription_initiation	.	.	.	.	.	.	.	.	424736	424588	424733	424585	False	True	False	False	False	False	False	False	False	False	False	False	False	False	False	False	False	False	False	False	False	False	False	False	False	False	False	False	False
chrI	426921	427072	chrI	426918	427069	putative_enhancer	transcription_initiation	transcription_initiation	.	.	.	.	.	.	.	.	427107	426973	427104	426970	True	True	False	False	False	False	False	False	False	False	False	False	False	False	False	False	False	False	False	False	False	False	False	False	False	False	False	False	False
chrI	429221	429372	chrI	429218	429369	putative_enhancer	transcription_initiation	transcription_initiation	.	.	.	.	.	.	.	.	429357	429245	429354	429242	True	True	False	False	False	False	False	False	False	False	False	False	False	False	False	False	False	False	False	False	False	False	False	False	False	False	False	False	False
chrI	430213	430364	chrI	430210	430361	putative_enhancer	transcription_initiation	no_transcription	.	.	.	.	.	.	.	.	430351	430228	430348	430225	True	False	False	False	False	False	False	False	False	False	False	False	False	False	False	False	False	False	False	False	False	False	False	False	False	False	False	False	False
chrI	432129	432280	chrI	432126	432277	coding_promoter	coding_promoter	transcription_initiation	WBGene00006593	tol-1	protein_coding	.	.	.	.	.	432264	432210	432261	432207	False	True	True	True	True	False	True	False	False	False	False	False	False	False	False	False	False	True	False	False	False	False	True	False	False	False	False	False	False
chrI	432661	432812	chrI	432658	432809	putative_enhancer	transcription_initiation	no_transcription	.	.	.	.	.	.	WBGene00006593	tol-1	432859	432676	432856	432673	True	False	False	False	False	False	False	False	False	False	False	False	False	False	False	False	False	False	False	False	False	False	False	False	False	False	False	False	False
chrI	433647	433798	chrI	433644	433795	unassigned_promoter	unassigned_promoter	transcription_initiation	.	.	.	.	.	.	WBGene00006593	tol-1	433844	433626	433841	433623	True	True	False	False	False	False	False	False	False	False	False	True	False	False	False	False	False	False	False	False	False	False	False	False	False	False	False	False	False
chrI	434613	434764	chrI	434610	434761	putative_enhancer	transcription_initiation	transcription_initiation	.	.	.	.	.	.	WBGene00006593	tol-1	434682	434566	434679	434563	True	True	False	False	False	False	False	False	False	False	False	False	False	False	False	False	False	False	False	False	False	False	False	False	False	False	False	False	False
chrI	435542	435693	chrI	435539	435690	putative_enhancer	transcription_initiation	transcription_initiation	.	.	.	.	.	.	WBGene00006593	tol-1	435653	435536	435650	435533	True	True	False	False	False	False	False	False	False	False	False	False	False	False	False	False	False	False	False	False	False	False	False	False	False	False	False	False	False
chrI	436161	436312	chrI	436158	436309	putative_enhancer	no_transcription	transcription_initiation	.	.	.	.	.	.	WBGene00006593	tol-1	436296	436166	436293	436163	False	True	False	False	False	False	False	False	False	False	False	False	False	False	False	False	False	False	False	False	False	False	False	False	False	False	False	False	False
chrI	436926	437077	chrI	436923	437074	putative_enhancer	transcription_initiation	transcription_initiation	.	.	.	.	.	.	WBGene00006593	tol-1	436985	436897	436982	436894	True	True	False	False	False	False	False	False	False	False	False	False	False	False	False	False	False	False	False	False	False	False	False	False	False	False	False	False	False
chrI	437716	437867	chrI	437713	437864	putative_enhancer	transcription_initiation	no_transcription	.	.	.	.	.	.	WBGene00006593	tol-1	437909	437731	437906	437728	True	False	False	False	False	False	False	False	False	False	False	False	False	False	False	False	False	False	False	False	False	False	False	False	False	False	False	False	False
chrI	438129	438280	chrI	438126	438277	putative_enhancer	transcription_initiation	transcription_initiation	.	.	.	.	.	.	WBGene00006593	tol-1	438262	438116	438259	438113	True	True	False	False	False	False	False	False	False	False	False	False	False	False	False	False	False	False	False	False	False	False	False	False	False	False	False	False	False
chrI	439436	439587	chrI	439433	439584	putative_enhancer	transcription_initiation	transcription_initiation	.	.	.	.	.	.	WBGene00006593	tol-1	439591	439478	439588	439475	True	True	False	False	False	False	False	False	False	False	False	False	False	False	False	False	False	False	False	False	False	False	False	False	False	False	False	False	False
chrI	440513	440664	chrI	440510	440661	putative_enhancer	no_transcription	transcription_initiation	.	.	.	.	.	.	WBGene00006593	tol-1	440648	440671	440645	440668	False	True	False	False	False	False	False	False	False	False	False	False	False	False	False	False	False	False	False	False	False	False	False	False	False	False	False	False	False
chrI	440821	440972	chrI	440818	440969	other_element	no_transcription	no_transcription	.	.	.	.	.	.	WBGene00006593	tol-1	440956	440836	440953	440833	False	False	False	False	False	False	False	False	False	False	False	False	False	False	False	False	False	False	False	False	False	False	False	False	False	False	False	False	False
chrI	441380	441531	chrI	441377	441528	putative_enhancer	transcription_initiation	transcription_initiation	.	.	.	.	.	.	WBGene00006593	tol-1	441513	441541	441510	441538	True	True	False	False	False	False	False	False	False	False	False	False	False	False	False	False	False	False	False	False	False	False	False	False	False	False	False	False	False
chrI	442170	442321	chrI	442167	442318	putative_enhancer	transcription_initiation	transcription_initiation	.	.	.	.	.	.	WBGene00006593	tol-1	442274	442310	442271	442307	True	True	False	False	False	False	False	False	False	False	False	False	False	False	False	False	False	False	False	False	False	False	False	False	False	False	False	False	False
chrI	443208	443359	chrI	443205	443356	putative_enhancer	transcription_initiation	transcription_initiation	.	.	.	.	.	.	WBGene00006593	tol-1	443339	443207	443336	443204	True	True	False	False	False	False	False	False	False	False	False	False	False	False	False	False	False	False	False	False	False	False	False	False	False	False	False	False	False
chrI	445616	445767	chrI	445613	445764	putative_enhancer	transcription_initiation	transcription_initiation	.	.	.	.	.	.	WBGene00006593	tol-1	445735	445664	445732	445661	True	True	False	False	False	False	False	False	False	False	False	False	False	False	False	False	False	False	False	False	False	False	False	False	False	False	False	False	False
chrI	446369	446520	chrI	446366	446517	putative_enhancer	transcription_initiation	transcription_initiation	.	.	.	.	.	.	WBGene00006593	tol-1	446483	446352	446480	446349	True	True	False	False	False	False	False	False	False	False	False	False	False	False	False	False	False	False	False	False	False	False	False	False	False	False	False	False	False
chrI	447650	447801	chrI	447647	447798	putative_enhancer	transcription_initiation	transcription_initiation	.	.	.	.	.	.	WBGene00006593	tol-1	447813	447639	447810	447636	True	True	False	False	False	False	True	False	False	False	False	False	False	False	False	False	False	False	False	False	True	False	False	False	False	False	False	False	False
chrI	448663	448814	chrI	448660	448811	other_element	no_transcription	no_transcription	.	.	.	.	.	.	WBGene00006593	tol-1	448798	448678	448795	448675	False	False	False	False	False	False	False	False	False	False	False	False	False	False	False	False	False	False	False	False	False	False	False	False	False	False	False	False	False
chrI	449466	449617	chrI	449463	449614	putative_enhancer	transcription_initiation	transcription_initiation	.	.	.	.	.	.	WBGene00006593	tol-1	449642	449452	449639	449449	True	True	False	False	False	False	False	False	False	False	False	False	False	False	False	False	False	False	False	False	False	False	False	False	False	False	False	False	False
chrI	452639	452790	chrI	452636	452787	putative_enhancer	transcription_initiation	transcription_initiation	.	.	.	.	.	.	WBGene00006593	tol-1	452739	452632	452736	452629	True	True	False	False	False	False	False	False	False	False	False	False	False	False	False	False	False	False	False	False	False	False	False	False	False	False	False	False	False
chrI	453529	453680	chrI	453526	453677	putative_enhancer	no_transcription	transcription_initiation	.	.	.	.	.	.	WBGene00006593	tol-1	453664	453549	453661	453546	False	True	False	False	False	False	False	False	False	False	False	False	False	False	False	False	False	False	False	False	False	False	False	False	False	False	False	False	False
chrI	454817	454968	chrI	454814	454965	putative_enhancer	transcription_initiation	transcription_initiation	.	.	.	.	.	.	WBGene00006593	tol-1	454982	454877	454979	454874	True	True	False	False	False	False	False	False	False	False	False	False	False	False	False	False	False	False	False	False	False	False	False	False	False	False	False	False	False
chrI	461671	461822	chrI	461668	461819	coding_promoter	coding_promoter	transcription_initiation	WBGene00021026	W04C9.4	protein_coding	.	.	.	.	.	461796	461686	461793	461683	True	True	True	True	True	True	True	True	False	False	False	False	False	False	False	False	False	False	False	False	False	False	False	False	False	False	False	False	False
chrI	471046	471197	chrI	471043	471194	unassigned_promoter	unassigned_promoter	transcription_initiation	.	.	.	.	.	.	.	.	471176	471244	471173	471241	True	True	False	False	True	False	False	False	True	False	True	False	False	True	False	True	True	True	False	True	True	True	True	True	False	False	False	False	False
chrI	475487	475638	chrI	475484	475635	putative_enhancer	transcription_initiation	no_transcription	.	.	.	.	.	.	.	.	475600	475502	475597	475499	True	False	False	False	False	False	False	False	False	False	False	False	False	False	False	False	False	False	False	False	False	False	False	False	False	False	False	False	False
chrI	476370	476521	chrI	476367	476518	putative_enhancer	transcription_initiation	transcription_initiation	.	.	.	.	.	.	.	.	476543	476401	476540	476398	True	True	False	False	False	False	False	False	False	False	False	False	False	False	False	False	False	False	False	False	False	False	False	False	False	False	False	False	False
chrI	477459	477610	chrI	477456	477607	coding_promoter	coding_promoter	transcription_initiation	WBGene00021025	cutl-13	protein_coding	.	.	.	.	.	477585	477430	477582	477427	True	True	True	False	False	False	False	False	False	False	False	False	False	False	False	False	False	False	False	False	False	False	False	False	False	False	False	False	False
chrI	488344	488495	chrI	488341	488492	coding_promoter	coding_promoter	coding_promoter	WBGene00021024	W04C9.2	protein_coding	WBGene00021028	W04C9.6	protein_coding	.	.	488488	488359	488485	488356	True	False	True	True	True	True	True	True	True	True	True	True	True	False	False	False	False	False	False	True	True	False	True	True	False	False	False	False	False
chrI	489880	490031	chrI	489877	490028	coding_promoter	coding_promoter	transcription_initiation	WBGene00001814	haf-4	protein_coding	.	.	.	.	.	490016	489973	490013	489970	True	True	False	False	True	False	False	False	False	False	True	False	True	False	False	False	False	False	False	False	False	False	False	False	False	False	False	False	False
chrI	492427	492578	chrI	492424	492575	other_element	no_transcription	no_transcription	.	.	.	.	.	.	WBGene00001814	haf-4	492562	492442	492559	492439	False	False	False	False	False	False	False	False	False	False	False	False	False	False	False	False	False	False	False	False	False	False	False	False	False	False	False	False	False
chrI	492687	492838	chrI	492684	492835	putative_enhancer	transcription_initiation	no_transcription	.	.	.	.	.	.	WBGene00001814	haf-4	492823	492702	492820	492699	True	False	True	True	True	True	True	True	True	True	True	True	True	False	False	False	False	False	False	False	False	False	False	False	False	False	False	False	False
chrI	495554	495705	chrI	495551	495702	other_element	no_transcription	no_transcription	.	.	.	.	.	.	WBGene00001814	haf-4	495689	495569	495686	495566	False	False	True	True	False	True	True	True	True	True	True	True	True	False	False	False	False	False	False	False	False	False	False	False	False	False	False	False	False
chrI	506274	506425	chrI	506271	506422	coding_promoter	coding_promoter	coding_promoter	WBGene00022034	deps-1	protein_coding	WBGene00022036	Y65B4BL.4	protein_coding	.	.	506442	506231	506439	506228	True	True	True	True	True	True	True	True	False	False	False	False	False	False	True	False	False	True	True	False	False	False	False	False	True	True	True	True	True
chrI	509951	510102	chrI	509948	510099	putative_enhancer	no_transcription	transcription_initiation	.	.	.	.	.	.	WBGene00022039	Y65B4BL.7	510086	509976	510083	509973	False	True	False	False	False	False	False	False	False	False	False	False	False	False	False	False	False	False	False	False	False	False	False	False	False	False	False	False	True
chrI	510465	510616	chrI	510462	510613	other_element	no_transcription	no_transcription	.	.	.	.	.	.	WBGene00022039	Y65B4BL.7	510600	510480	510597	510477	False	False	False	False	False	False	False	False	False	False	False	False	False	False	False	False	False	True	False	False	False	False	False	False	False	False	False	False	False
chrI	510780	510931	chrI	510777	510928	coding_promoter	no_transcription	coding_promoter	.	.	.	WBGene00022039	Y65B4BL.7	protein_coding	.	.	510915	510879	510912	510876	False	True	False	False	False	False	False	False	False	False	False	False	False	False	False	False	False	False	False	False	False	False	False	False	False	False	False	False	False
chrI	511173	511324	chrI	511170	511321	putative_enhancer	transcription_initiation	transcription_initiation	.	.	.	.	.	.	WBGene00022037	acs-13	511322	511127	511319	511124	True	True	False	False	False	False	False	False	False	False	False	False	False	False	False	False	True	False	False	True	False	True	False	False	False	False	False	False	False
chrI	515173	515324	chrI	515170	515321	putative_enhancer	no_transcription	transcription_initiation	.	.	.	.	.	.	WBGene00022037	acs-13	515308	515228	515305	515225	False	True	False	False	False	False	False	False	False	False	False	False	False	False	False	False	False	False	False	False	False	True	False	False	True	False	False	True	True
chrI	516342	516493	chrI	516339	516490	putative_enhancer	transcription_initiation	transcription_initiation	.	.	.	.	.	.	WBGene00022037	acs-13	516395	516399	516392	516396	True	True	False	False	False	False	False	False	False	False	False	False	False	False	False	True	False	False	False	False	False	False	False	False	False	False	False	False	False
chrI	516716	516867	chrI	516713	516864	coding_promoter	transcription_initiation	coding_promoter	.	.	.	WBGene00022037	acs-13	protein_coding	.	.	516887	516696	516884	516693	True	True	False	False	False	False	False	False	False	False	False	False	False	False	True	False	False	False	False	False	False	False	False	False	False	False	True	True	False
chrI	518192	518343	chrI	518189	518340	coding_promoter	transcription_initiation	coding_promoter	.	.	.	WBGene00022037	acs-13	protein_coding	.	.	518219	518296	518216	518293	True	True	False	False	False	False	False	False	False	False	False	False	False	False	False	False	False	False	False	False	False	False	False	False	False	False	False	False	False
chrI	518546	518697	chrI	518543	518694	coding_promoter	unassigned_promoter	coding_promoter	.	.	.	WBGene00022037	acs-13	protein_coding	.	.	518685	518514	518682	518511	True	True	True	True	False	False	False	False	False	False	False	False	False	False	True	False	False	True	True	False	False	True	False	True	True	True	True	True	False
chrI	519500	519651	chrI	519497	519648	putative_enhancer	transcription_initiation	transcription_initiation	.	.	.	.	.	.	WBGene00022037	acs-13	519551	519540	519548	519537	True	True	False	False	False	False	False	False	False	False	False	False	False	False	False	False	False	False	False	False	False	False	False	False	False	False	False	False	False
chrI	519880	520031	chrI	519877	520028	coding_promoter	no_transcription	coding_promoter	.	.	.	WBGene00022037	acs-13	protein_coding	.	.	520015	519996	520012	519993	False	True	False	False	False	False	False	False	False	False	False	False	False	False	False	False	False	False	False	False	False	False	False	False	True	True	True	True	True
chrI	520355	520506	chrI	520352	520503	other_element	no_transcription	no_transcription	.	.	.	.	.	.	WBGene00022038	Y65B4BL.6	520490	520370	520487	520367	False	False	False	False	False	False	False	False	False	False	False	False	False	False	False	False	False	False	False	False	False	False	False	False	False	False	False	False	False
chrI	521439	521590	chrI	521436	521587	coding_promoter	transcription_initiation	coding_promoter	.	.	.	WBGene00022038	Y65B4BL.6	protein_coding	.	.	521566	521393	521563	521390	True	True	False	False	False	False	False	False	False	False	False	False	False	False	False	False	False	False	False	False	False	False	False	False	True	False	True	True	True
chrI	524261	524412	chrI	524258	524409	putative_enhancer	transcription_initiation	no_transcription	.	.	.	.	.	.	.	.	524366	524276	524363	524273	True	False	False	False	False	False	False	False	False	False	False	False	False	False	False	True	False	False	False	False	False	False	False	False	False	False	False	False	False
chrI	524577	524728	chrI	524574	524725	unassigned_promoter	transcription_initiation	unassigned_promoter	.	.	.	.	.	.	.	.	524758	524613	524755	524610	True	True	False	False	False	False	False	False	False	False	False	False	False	False	False	False	False	False	False	False	False	False	False	False	False	True	True	False	False
chrI	526200	526351	chrI	526197	526348	putative_enhancer	transcription_initiation	transcription_initiation	.	.	.	.	.	.	.	.	526311	526211	526308	526208	True	True	False	False	False	False	False	False	False	False	False	False	False	True	False	False	False	False	False	False	False	False	False	False	False	False	False	False	False
chrI	527268	527419	chrI	527265	527416	putative_enhancer	transcription_initiation	transcription_initiation	.	.	.	.	.	.	.	.	527383	527255	527380	527252	True	True	False	False	False	False	False	False	False	False	False	False	False	False	True	True	True	False	False	False	False	False	False	False	False	False	False	False	False
chrI	527540	527691	chrI	527537	527688	putative_enhancer	transcription_initiation	transcription_initiation	.	.	.	.	.	.	.	.	527656	527552	527653	527549	True	True	False	False	False	False	False	False	False	False	False	False	False	False	False	False	False	False	False	False	False	False	False	False	False	False	False	False	False
chrI	528015	528166	chrI	528012	528163	putative_enhancer	transcription_initiation	transcription_initiation	.	.	.	.	.	.	.	.	528075	528086	528072	528083	True	True	False	False	False	False	False	False	False	False	False	False	False	False	False	False	False	False	False	False	False	False	False	False	False	False	False	False	False
chrI	529259	529410	chrI	529256	529407	coding_promoter	coding_promoter	transcription_initiation	WBGene00022033	Y65B4BL.1	protein_coding	.	.	.	.	.	529450	529213	529447	529210	True	True	False	False	False	False	False	False	False	False	False	False	False	True	False	False	False	True	False	False	False	False	False	False	False	False	False	False	False
chrI	529557	529708	chrI	529554	529705	coding_promoter	coding_promoter	transcription_initiation	WBGene00022033	Y65B4BL.1	protein_coding	.	.	.	.	.	529722	529511	529719	529508	True	True	False	False	False	False	True	False	False	False	False	False	False	False	False	False	False	False	False	False	False	False	False	False	False	False	False	False	False
chrI	529911	530062	chrI	529908	530059	putative_enhancer	transcription_initiation	transcription_initiation	.	.	.	.	.	.	WBGene00022033	Y65B4BL.1	530046	529948	530043	529945	True	True	False	False	False	False	False	False	False	False	False	False	False	False	False	False	False	False	False	False	False	False	False	False	False	False	False	False	False
chrI	530211	530362	chrI	530208	530359	coding_promoter	coding_promoter	unassigned_promoter	WBGene00022033	Y65B4BL.1	protein_coding	.	.	.	.	.	530258	530202	530255	530199	True	True	False	True	True	True	True	False	False	False	False	False	False	False	False	False	False	False	False	False	False	False	False	False	False	False	False	False	True
chrI	530466	530617	chrI	530463	530614	coding_promoter	coding_promoter	transcription_initiation	WBGene00022033	Y65B4BL.1	protein_coding	.	.	.	.	.	530564	530451	530561	530448	True	True	True	True	True	False	True	False	False	False	False	False	False	False	False	False	False	False	False	False	False	False	False	False	False	False	False	False	False
chrI	531128	531279	chrI	531125	531276	putative_enhancer	transcription_initiation	no_transcription	.	.	.	.	.	.	WBGene00022033	Y65B4BL.1	531294	531143	531291	531140	True	False	False	False	False	False	False	False	False	False	False	False	False	False	False	False	False	False	False	False	False	False	False	False	False	False	False	False	False
chrI	531383	531534	chrI	531380	531531	putative_enhancer	no_transcription	transcription_initiation	.	.	.	.	.	.	WBGene00022033	Y65B4BL.1	531518	531539	531515	531536	False	True	False	False	False	False	False	False	False	False	False	False	False	False	False	False	False	False	False	False	False	False	False	False	False	False	False	False	False
chrI	531635	531786	chrI	531632	531783	coding_promoter	coding_promoter	transcription_initiation	WBGene00022033	Y65B4BL.1	protein_coding	.	.	.	.	.	531785	531610	531782	531607	True	True	True	False	False	False	True	False	False	False	False	False	False	False	False	False	False	False	False	False	False	False	False	False	False	False	False	False	False
chrI	532895	533046	chrI	532892	533043	other_element	no_transcription	no_transcription	.	.	.	.	.	.	WBGene00022033	Y65B4BL.1	533030	532910	533027	532907	False	False	False	False	False	False	False	False	False	False	False	False	False	False	False	False	False	False	False	False	False	False	False	False	False	False	False	False	False
chrI	533218	533369	chrI	533215	533366	putative_enhancer	no_transcription	transcription_initiation	.	.	.	.	.	.	.	.	533353	533334	533350	533331	False	True	False	False	False	False	False	False	False	False	False	False	False	False	False	False	False	False	False	False	False	False	False	False	False	False	False	False	False
chrI	533479	533630	chrI	533476	533627	coding_promoter	coding_promoter	no_transcription	WBGene00022043	psf-3	protein_coding	.	.	.	.	.	533559	533494	533556	533491	True	False	False	True	False	False	False	False	False	False	False	False	False	False	True	False	False	False	False	False	False	False	False	False	False	False	False	False	False
chrI	534254	534405	chrI	534251	534402	coding_promoter	coding_promoter	transcription_initiation	WBGene00022043	psf-3	protein_coding	.	.	.	.	.	534341	534275	534338	534272	True	True	True	True	True	True	True	True	False	False	False	False	False	False	False	False	False	False	False	False	False	False	False	False	False	False	False	False	False
chrI	535378	535529	chrI	535375	535526	coding_promoter	coding_promoter	transcription_initiation	WBGene00022042	icd-2	protein_coding	.	.	.	.	.	535506	535465	535503	535462	True	True	True	True	True	True	True	True	True	False	True	True	True	False	False	False	True	False	False	True	False	True	True	True	False	False	False	False	False
chrI	536376	536527	chrI	536373	536524	putative_enhancer	transcription_initiation	transcription_initiation	.	.	.	.	.	.	WBGene00022042	icd-2	536372	536459	536369	536456	True	True	False	False	False	False	False	False	False	False	False	False	False	False	False	False	False	False	False	False	False	False	False	False	False	False	False	False	False
chrI	536800	536951	chrI	536797	536948	coding_promoter	coding_promoter	transcription_initiation	WBGene00007009	wwp-1	protein_coding	.	.	.	.	.	536932	536802	536929	536799	True	True	True	False	True	True	True	True	True	True	True	True	True	False	False	False	False	False	False	False	False	False	False	False	False	False	False	False	False
chrI	537278	537429	chrI	537275	537426	putative_enhancer	transcription_initiation	transcription_initiation	.	.	.	.	.	.	WBGene00007009	wwp-1	537378	537342	537375	537339	True	True	False	False	False	False	False	False	False	False	False	False	False	False	False	False	False	False	False	False	False	False	False	False	False	False	False	False	False
chrI	538712	538863	chrI	538709	538860	coding_promoter	coding_promoter	transcription_initiation	WBGene00007009	wwp-1	protein_coding	.	.	.	.	.	538760	538778	538757	538775	True	True	False	False	True	False	True	True	True	False	False	True	False	False	False	False	False	False	False	False	False	False	False	False	False	False	False	False	False
chrI	542266	542417	chrI	542263	542414	putative_enhancer	transcription_initiation	transcription_initiation	.	.	.	.	.	.	.	.	542390	542290	542387	542287	True	True	False	False	False	False	False	False	False	False	False	False	False	False	False	False	False	False	False	False	False	False	False	False	False	False	False	False	False
chrI	543376	543527	chrI	543373	543524	putative_enhancer	transcription_initiation	no_transcription	.	.	.	.	.	.	.	.	543486	543391	543483	543388	True	False	False	False	False	False	False	False	False	False	False	False	False	False	False	False	False	False	False	False	False	False	False	False	False	False	False	False	False
chrI	545603	545754	chrI	545600	545751	unassigned_promoter	transcription_initiation	unassigned_promoter	.	.	.	.	.	.	.	.	545752	545589	545749	545586	True	True	False	False	False	False	False	False	False	False	False	False	False	False	False	False	False	False	False	False	False	False	False	False	False	False	True	False	False
chrI	545768	545919	chrI	545765	545916	coding_promoter	coding_promoter	no_transcription	WBGene00004235	ptr-21	protein_coding	.	.	.	.	.	545895	545783	545892	545780	True	False	False	False	True	True	True	True	True	False	False	False	False	False	False	True	False	True	True	True	False	False	False	False	False	False	False	False	False
chrI	546615	546766	chrI	546612	546763	other_element	no_transcription	no_transcription	.	.	.	.	.	.	WBGene00004235	ptr-21	546750	546630	546747	546627	False	False	False	False	False	False	False	False	False	False	False	False	False	False	False	False	False	False	False	False	False	False	False	False	False	False	False	False	False
chrI	547202	547353	chrI	547199	547350	coding_promoter	coding_promoter	transcription_initiation	WBGene00004235	ptr-21	protein_coding	.	.	.	.	.	547307	547208	547304	547205	True	True	False	False	False	False	False	False	False	False	False	False	False	False	False	False	False	False	False	True	True	False	False	True	False	False	False	False	False
chrI	547514	547665	chrI	547511	547662	unassigned_promoter	no_transcription	unassigned_promoter	.	.	.	.	.	.	WBGene00004235	ptr-21	547649	547525	547646	547522	False	True	False	False	False	False	False	False	False	False	False	False	False	False	False	False	False	False	False	False	False	False	False	False	False	False	True	False	False
chrI	548093	548244	chrI	548090	548241	putative_enhancer	no_transcription	transcription_initiation	.	.	.	.	.	.	WBGene00004235	ptr-21	548228	548051	548225	548048	False	True	False	False	False	False	False	False	False	False	False	False	False	False	False	False	False	False	False	False	False	False	False	True	False	False	False	False	False
chrI	548412	548563	chrI	548409	548560	putative_enhancer	transcription_initiation	no_transcription	.	.	.	.	.	.	WBGene00004235	ptr-21	548510	548427	548507	548424	True	False	False	False	False	False	False	False	False	False	False	False	False	False	False	False	False	False	False	False	False	False	False	False	False	False	False	False	False
chrI	549325	549476	chrI	549322	549473	putative_enhancer	transcription_initiation	transcription_initiation	.	.	.	.	.	.	WBGene00004235	ptr-21	549462	549452	549459	549449	True	True	False	False	False	False	False	False	False	False	False	False	False	False	False	False	False	False	False	False	False	False	False	False	False	False	False	False	False
chrI	549967	550118	chrI	549964	550115	other_element	no_transcription	no_transcription	.	.	.	.	.	.	WBGene00004235	ptr-21	550102	549982	550099	549979	False	False	False	False	False	False	False	False	False	False	False	False	False	False	False	False	False	False	False	False	False	False	False	False	False	False	False	False	False
chrI	550456	550607	chrI	550453	550604	coding_promoter	coding_promoter	no_transcription	WBGene00004235	ptr-21	protein_coding	.	.	.	.	.	550454	550471	550451	550468	True	False	True	True	True	True	True	True	True	True	True	True	True	False	False	False	False	False	False	False	False	False	False	False	False	False	False	False	False
chrI	556118	556269	chrI	556115	556266	other_element	no_transcription	no_transcription	.	.	.	.	.	.	WBGene00004235	ptr-21	556253	556133	556250	556130	False	False	False	True	False	False	False	False	False	False	False	False	False	False	False	False	False	False	False	False	False	False	False	False	False	False	False	False	False
chrI	557289	557440	chrI	557286	557437	coding_promoter	coding_promoter	transcription_initiation	WBGene00002393	lpr-1	protein_coding	.	.	.	.	.	557425	557257	557422	557254	True	True	False	False	False	True	True	False	False	False	False	False	False	False	True	False	False	False	False	False	True	False	False	False	False	False	False	False	False
chrI	561140	561291	chrI	561137	561288	putative_enhancer	transcription_initiation	no_transcription	.	.	.	.	.	.	WBGene00002393	lpr-1	561236	561155	561233	561152	True	False	True	False	False	False	False	False	False	False	False	False	False	False	False	False	False	False	False	False	False	True	False	True	False	False	False	False	False
chrI	562622	562773	chrI	562619	562770	coding_promoter	coding_promoter	no_transcription	WBGene00022040	Y65B4BR.1	protein_coding	.	.	.	.	.	562738	562637	562735	562634	True	False	False	False	True	False	False	False	False	True	True	True	False	False	False	False	False	False	True	True	True	True	True	True	False	False	False	False	False
chrI	562987	563138	chrI	562984	563135	other_element	no_transcription	no_transcription	.	.	.	.	.	.	WBGene00022040	Y65B4BR.1	563122	563002	563119	562999	False	False	False	False	False	False	False	False	False	False	False	False	False	False	False	False	False	False	False	False	False	False	False	False	False	False	False	False	False
chrI	565066	565217	chrI	565063	565214	other_element	no_transcription	no_transcription	.	.	.	.	.	.	WBGene00022040	Y65B4BR.1	565201	565081	565198	565078	False	False	False	False	False	False	False	False	False	False	False	False	False	False	False	False	False	False	False	False	False	False	False	False	False	False	False	False	False
chrI	566552	566703	chrI	566549	566700	coding_promoter	no_transcription	coding_promoter	.	.	.	WBGene00000434	ceh-9	protein_coding	.	.	566687	566567	566684	566564	False	False	False	False	False	False	False	False	False	False	False	False	False	False	False	False	False	False	False	False	False	False	False	False	True	False	True	False	False
chrI	572756	572907	chrI	572753	572904	putative_enhancer	transcription_initiation	no_transcription	.	.	.	.	.	.	WBGene00001725	grl-16	572904	572771	572901	572768	True	False	False	False	False	False	False	False	False	False	False	False	False	False	False	False	True	False	False	False	False	False	False	False	False	False	False	False	False
chrI	575159	575310	chrI	575156	575307	coding_promoter	transcription_initiation	coding_promoter	.	.	.	WBGene00001725	grl-16	protein_coding	.	.	575302	575121	575299	575118	True	True	False	False	False	False	False	False	False	False	False	False	False	False	False	False	False	False	False	False	False	False	False	False	True	False	True	True	True
chrI	597055	597206	chrI	597052	597203	putative_enhancer	transcription_initiation	transcription_initiation	.	.	.	.	.	.	WBGene00002040	hum-7	597218	597018	597215	597015	True	True	False	False	False	False	False	False	False	False	False	False	False	False	False	False	False	False	False	False	False	False	False	False	True	True	True	False	True
chrI	606635	606786	chrI	606632	606783	putative_enhancer	transcription_initiation	transcription_initiation	.	.	.	.	.	.	WBGene00002040	hum-7	606732	606642	606729	606639	True	True	False	False	False	False	False	False	False	False	False	False	False	False	False	False	False	False	False	False	False	False	False	False	False	False	False	False	False
chrI	608904	609055	chrI	608901	609052	coding_promoter	no_transcription	coding_promoter	.	.	.	WBGene00002040	hum-7	protein_coding	.	.	609039	608929	609036	608926	False	True	False	False	False	False	False	False	False	False	False	False	False	False	False	True	False	False	False	False	False	False	False	False	False	False	False	False	False
chrI	611702	611853	chrI	611699	611850	putative_enhancer	transcription_initiation	transcription_initiation	.	.	.	.	.	.	.	.	611702	611735	611699	611732	True	True	False	False	False	False	False	False	False	False	False	False	False	False	False	False	False	False	False	False	False	False	False	False	False	False	False	False	False
chrI	613173	613324	chrI	613170	613321	unassigned_promoter	no_transcription	unassigned_promoter	.	.	.	.	.	.	.	.	613308	613132	613305	613129	False	True	False	False	False	False	False	False	False	False	False	False	False	False	False	False	False	False	False	False	False	False	False	False	False	True	True	False	False
chrI	613311	613462	chrI	613308	613459	putative_enhancer	transcription_initiation	no_transcription	.	.	.	.	.	.	.	.	613435	613326	613432	613323	True	False	False	False	False	False	False	False	False	False	False	False	False	False	False	False	False	False	False	False	False	False	False	False	False	False	False	False	False
chrI	618022	618173	chrI	618019	618170	coding_promoter	coding_promoter	no_transcription	WBGene00018921	sago-2	protein_coding	.	.	.	.	.	618162	618037	618159	618034	True	False	False	True	True	True	True	True	True	True	True	True	True	False	False	False	False	False	False	True	True	False	True	True	False	False	False	False	False
chrI	629589	629740	chrI	629586	629737	coding_promoter	transcription_initiation	coding_promoter	.	.	.	WBGene00018923	eme-1	protein_coding	.	.	629763	629666	629760	629663	True	True	False	False	False	False	False	False	False	False	False	False	False	False	False	False	False	False	False	False	False	False	False	False	False	False	False	False	False
chrI	630263	630414	chrI	630260	630411	non-coding_RNA	no_transcription	non-coding_RNA	.	.	.	WBGene00220188	Y65B4A.10	snoRNA	.	.	630398	630278	630395	630275	False	False	False	False	False	False	False	False	False	False	False	False	False	False	False	False	False	False	False	False	False	False	False	False	False	False	False	False	False
chrI	636763	636914	chrI	636760	636911	coding_promoter	coding_promoter	coding_promoter	WBGene00022027	vps-20	protein_coding	WBGene00022029	Y65B4A.6	protein_coding	.	.	636864	636778	636861	636775	True	True	True	True	True	True	True	True	True	True	True	True	True	False	False	False	True	False	False	False	True	False	False	False	False	True	True	True	True
chrI	638012	638163	chrI	638009	638160	coding_promoter	coding_promoter	transcription_initiation	WBGene00022026	Y65B4A.2	protein_coding	.	.	.	.	.	638136	638069	638133	638066	True	True	False	False	False	False	True	False	False	False	False	False	False	False	False	False	False	True	False	False	False	False	False	False	False	False	False	False	False
chrI	638324	638475	chrI	638321	638472	putative_enhancer	transcription_initiation	no_transcription	.	.	.	.	.	.	WBGene00022026	Y65B4A.2	638376	638339	638373	638336	True	False	False	False	False	False	False	False	False	False	False	False	False	False	False	False	False	False	False	False	False	False	False	False	False	False	False	False	False
chrI	640117	640268	chrI	640114	640265	coding_promoter	coding_promoter	transcription_initiation	WBGene00022026	Y65B4A.2	protein_coding	.	.	.	.	.	640274	640268	640271	640265	True	True	False	True	True	False	True	False	False	False	False	True	False	False	False	False	False	False	False	False	False	False	False	False	False	False	False	False	False
chrI	644881	645032	chrI	644878	645029	putative_enhancer	transcription_initiation	transcription_initiation	.	.	.	.	.	.	WBGene00022026	Y65B4A.2	645069	644933	645066	644930	True	True	False	False	False	False	False	False	False	False	False	False	False	False	False	False	False	False	False	False	False	False	False	False	False	False	False	False	False
chrI	649573	649724	chrI	649570	649721	other_element	no_transcription	no_transcription	.	.	.	.	.	.	WBGene00022026	Y65B4A.2	649708	649588	649705	649585	False	False	False	False	False	False	False	False	False	False	False	False	False	False	False	False	False	False	False	False	False	False	False	False	False	False	False	False	False
chrI	653957	654108	chrI	653954	654105	coding_promoter	coding_promoter	transcription_initiation	WBGene00022025	Y65B4A.1	protein_coding	.	.	.	.	.	654095	653996	654092	653993	True	True	True	True	True	True	True	True	True	False	True	False	False	False	False	False	False	False	False	False	False	False	False	False	False	False	False	False	False
chrI	663586	663737	chrI	663583	663734	coding_promoter	transcription_initiation	coding_promoter	.	.	.	WBGene00022031	Y65B4A.8	protein_coding	.	.	663771	663627	663768	663624	True	True	False	False	False	False	False	False	False	False	False	False	False	False	False	False	False	False	False	False	False	False	False	False	True	True	True	True	True
chrI	663971	664122	chrI	663968	664119	other_element	no_transcription	no_transcription	.	.	.	.	.	.	.	.	664106	663986	664103	663983	False	False	False	False	False	False	False	False	False	False	False	False	False	False	False	False	False	False	False	False	False	False	False	True	False	False	False	False	False
chrI	666417	666568	chrI	666414	666565	other_element	no_transcription	no_transcription	.	.	.	.	.	.	WBGene00022032	Y65B4A.9	666552	666432	666549	666429	False	False	False	False	False	False	False	False	False	False	False	False	False	False	False	False	False	False	False	False	False	False	False	False	False	False	False	False	False
chrI	670851	671002	chrI	670848	670999	other_element	no_transcription	no_transcription	.	.	.	.	.	.	WBGene00044461	Y18H1A.14	670986	670866	670983	670863	False	False	False	False	False	False	False	False	False	False	False	False	False	False	False	False	False	False	False	False	False	False	False	False	False	False	False	False	False
chrI	678257	678408	chrI	678254	678405	other_element	no_transcription	no_transcription	.	.	.	.	.	.	.	.	678392	678272	678389	678269	False	False	False	False	False	False	False	False	False	False	False	False	False	False	False	False	False	False	False	False	False	False	False	False	False	False	False	False	False
chrI	680054	680205	chrI	680051	680202	coding_promoter	coding_promoter	transcription_initiation	WBGene00021215	Y18H1A.11	protein_coding	.	.	.	.	.	680181	680087	680178	680084	True	True	False	True	True	True	True	False	False	False	True	False	True	False	True	True	False	True	False	True	True	True	False	True	False	False	False	False	False
chrI	681488	681639	chrI	681485	681636	other_element	no_transcription	no_transcription	.	.	.	.	.	.	WBGene00021215	Y18H1A.11	681623	681503	681620	681500	False	False	False	False	False	False	False	False	False	False	False	False	False	False	False	False	False	False	False	False	False	False	False	False	False	False	False	False	False
chrI	682941	683092	chrI	682938	683089	putative_enhancer	no_transcription	transcription_initiation	.	.	.	.	.	.	WBGene00021214,WBGene00021215	Y18H1A.11,hasp-2	683076	683046	683073	683043	False	True	True	True	False	False	False	True	False	False	False	False	False	False	False	False	False	False	True	False	False	False	False	False	False	False	False	False	False
chrI	691389	691540	chrI	691386	691537	other_element	no_transcription	no_transcription	.	.	.	.	.	.	.	.	691524	691404	691521	691401	False	False	False	False	False	False	False	False	False	False	False	False	False	False	False	False	False	False	False	False	False	False	False	False	False	False	False	False	False
chrI	716297	716448	chrI	716294	716445	other_element	no_transcription	no_transcription	.	.	.	.	.	.	WBGene00021209	hgap-1	716432	716312	716429	716309	False	False	False	False	False	False	False	False	False	False	False	False	False	False	False	False	False	False	False	False	False	False	False	False	False	False	False	False	False
chrI	716703	716854	chrI	716700	716851	coding_promoter	transcription_initiation	coding_promoter	.	.	.	WBGene00021209	hgap-1	protein_coding	.	.	716824	716723	716821	716720	True	True	False	False	False	False	False	False	False	False	False	False	False	False	False	False	False	False	False	False	False	False	False	False	True	True	True	True	True
chrI	717719	717870	chrI	717716	717867	putative_enhancer	no_transcription	transcription_initiation	.	.	.	.	.	.	.	.	717854	717731	717851	717728	False	True	False	False	False	False	False	False	False	False	False	False	False	False	False	False	False	False	False	False	False	False	False	False	False	False	False	False	False
chrI	719588	719739	chrI	719585	719736	coding_promoter	transcription_initiation	coding_promoter	.	.	.	WBGene00004332	rec-1	protein_coding	.	.	719730	719702	719727	719699	True	True	False	False	False	False	False	False	False	False	False	False	False	False	False	False	False	False	False	False	False	False	False	False	True	False	False	False	True
chrI	719921	720072	chrI	719918	720069	coding_promoter	coding_promoter	coding_promoter	WBGene00004028	pif-1	protein_coding	WBGene00004332	rec-1	protein_coding	.	.	720039	719967	720036	719964	True	True	True	True	True	True	True	True	False	False	False	False	False	True	False	False	False	False	False	True	False	False	False	False	False	True	True	True	True
chrI	720274	720425	chrI	720271	720422	putative_enhancer	transcription_initiation	transcription_initiation	.	.	.	.	.	.	WBGene00004028	pif-1	720420	720323	720417	720320	True	True	False	False	False	False	False	False	False	False	False	False	False	False	False	False	False	False	False	False	False	False	False	False	False	False	False	False	False
chrI	737588	737739	chrI	737585	737736	coding_promoter	coding_promoter	coding_promoter	WBGene00236789	Y18H1A.18	protein_coding	WBGene00044434	Y18H1A.15	protein_coding	.	.	737723	737655	737720	737652	False	True	False	True	True	False	False	False	False	False	False	False	False	False	True	True	True	True	False	False	False	False	False	False	False	False	False	False	False
chrI	744883	745034	chrI	744880	745031	other_element	no_transcription	no_transcription	.	.	.	.	.	.	WBGene00000623	col-46	745018	744898	745015	744895	False	False	False	False	False	False	False	False	False	False	False	False	False	False	False	False	False	False	False	False	False	False	False	False	False	False	False	False	False
chrI	745495	745646	chrI	745492	745643	coding_promoter	coding_promoter	coding_promoter	WBGene00000624	col-47	protein_coding	WBGene00000623	col-46	protein_coding	.	.	745630	745506	745627	745503	False	True	False	False	False	False	True	False	False	False	False	False	False	False	False	False	False	True	False	False	False	False	False	False	False	False	False	True	True
chrI	754147	754298	chrI	754144	754295	putative_enhancer	no_transcription	transcription_initiation	.	.	.	.	.	.	WBGene00021213	Y18H1A.9	754282	754146	754279	754143	False	True	False	False	False	False	False	False	False	False	False	False	False	False	False	False	False	False	False	False	False	False	False	False	True	False	False	False	False
chrI	754614	754765	chrI	754611	754762	non-coding_RNA	non-coding_RNA	no_transcription	WBGene00023169	Y18H1A.t1	tRNA	.	.	.	.	.	754730	754629	754727	754626	True	False	False	False	False	False	False	False	False	False	False	False	False	False	False	False	False	False	False	False	False	False	False	False	True	False	False	False	True
chrI	756959	757110	chrI	756956	757107	coding_promoter	coding_promoter	coding_promoter	WBGene00021212	Y18H1A.8	protein_coding	WBGene00021213	Y18H1A.9	protein_coding	.	.	757149	756948	757146	756945	True	True	False	False	True	True	True	False	False	False	False	False	False	True	False	False	True	False	False	False	False	False	False	False	True	False	True	True	True
chrI	762058	762209	chrI	762055	762206	coding_promoter	no_transcription	coding_promoter	.	.	.	WBGene00020282	mps-3	protein_coding	.	.	762193	762073	762190	762070	False	False	False	False	False	False	False	False	False	False	False	False	False	False	False	False	False	True	False	False	False	False	False	False	False	False	False	False	False
chrI	762430	762581	chrI	762427	762578	other_element	no_transcription	no_transcription	.	.	.	.	.	.	.	.	762565	762445	762562	762442	False	False	False	False	False	False	False	False	False	False	False	False	False	False	False	False	False	False	False	False	False	False	False	True	False	False	False	False	False
chrI	763453	763604	chrI	763450	763601	coding_promoter	coding_promoter	transcription_initiation	WBGene00020283	T06A4.3	protein_coding	.	.	.	.	.	763623	763426	763620	763423	True	True	True	False	True	True	True	False	False	False	False	False	False	False	False	False	False	False	True	True	False	False	False	False	False	False	False	False	False
chrI	766064	766215	chrI	766061	766212	other_element	no_transcription	no_transcription	.	.	.	.	.	.	WBGene00020283	T06A4.3	766199	766079	766196	766076	False	False	False	False	False	False	False	False	False	False	False	False	False	False	False	False	False	False	False	False	False	False	False	False	False	False	False	False	False
chrI	770779	770930	chrI	770776	770927	coding_promoter	coding_promoter	no_transcription	WBGene00020281	T06A4.1	protein_coding	.	.	.	.	.	770943	770794	770940	770791	True	False	True	False	False	True	False	False	False	False	False	False	False	False	False	False	False	False	False	False	False	False	False	False	False	False	False	False	False
chrI	781576	781727	chrI	781573	781724	putative_enhancer	no_transcription	transcription_initiation	.	.	.	.	.	.	.	.	781711	781624	781708	781621	False	True	False	False	False	False	False	False	False	False	False	False	False	False	False	False	False	False	False	False	False	False	False	False	False	False	False	False	False
chrI	784086	784237	chrI	784083	784234	unassigned_promoter	unassigned_promoter	transcription_initiation	.	.	.	.	.	.	.	.	784260	784037	784257	784034	True	True	False	False	True	False	False	False	False	False	False	False	False	False	False	True	True	True	False	False	False	False	False	False	False	False	False	False	False
chrI	784517	784668	chrI	784514	784665	other_element	no_transcription	no_transcription	.	.	.	.	.	.	.	.	784652	784532	784649	784529	False	False	False	False	False	False	False	False	False	False	False	False	False	False	False	False	False	False	False	False	False	False	False	False	False	False	False	False	False
chrI	785303	785454	chrI	785300	785451	putative_enhancer	transcription_initiation	no_transcription	.	.	.	.	.	.	.	.	785435	785318	785432	785315	True	False	False	False	False	False	False	False	False	False	False	False	False	False	False	False	False	False	False	False	False	False	False	False	False	False	False	False	False
chrI	788100	788251	chrI	788097	788248	putative_enhancer	transcription_initiation	no_transcription	.	.	.	.	.	.	.	.	788232	788115	788229	788112	True	False	False	False	False	False	False	False	False	False	False	False	False	False	False	False	False	False	False	False	False	False	False	False	False	False	False	False	False
chrI	788613	788764	chrI	788610	788761	putative_enhancer	transcription_initiation	transcription_initiation	.	.	.	.	.	.	.	.	788810	788609	788807	788606	True	True	False	False	False	False	False	False	False	False	False	False	False	False	False	False	True	False	False	False	False	False	False	False	False	False	False	False	False
chrI	789474	789625	chrI	789471	789622	putative_enhancer	transcription_initiation	transcription_initiation	.	.	.	.	.	.	.	.	789616	789497	789613	789494	True	True	False	False	False	False	False	False	False	False	False	False	False	False	False	False	False	False	False	False	False	False	False	False	False	False	False	False	False
chrI	794500	794651	chrI	794497	794648	putative_enhancer	transcription_initiation	no_transcription	.	.	.	.	.	.	.	.	794567	794515	794564	794512	True	False	False	False	False	False	False	False	False	False	False	False	False	False	False	False	False	False	False	False	False	False	False	True	False	False	False	False	False
chrI	796991	797142	chrI	796988	797139	putative_enhancer	transcription_initiation	transcription_initiation	.	.	.	.	.	.	.	.	797043	797092	797040	797089	True	True	False	False	False	False	False	False	False	False	False	False	False	False	False	False	False	False	False	False	False	False	False	False	False	False	False	False	False
chrI	798393	798544	chrI	798390	798541	putative_enhancer	no_transcription	transcription_initiation	.	.	.	.	.	.	.	.	798528	798352	798525	798349	False	True	False	False	False	False	False	False	False	False	False	False	False	False	False	False	False	False	False	False	False	False	False	False	False	False	False	False	False
chrI	801349	801500	chrI	801346	801497	putative_enhancer	no_transcription	transcription_initiation	.	.	.	.	.	.	.	.	801484	801342	801481	801339	False	True	False	False	False	False	False	False	False	False	False	False	False	False	False	False	False	False	False	False	False	False	False	False	False	False	False	False	False
chrI	801589	801740	chrI	801586	801737	putative_enhancer	transcription_initiation	transcription_initiation	.	.	.	.	.	.	.	.	801770	801592	801767	801589	True	True	False	False	False	False	False	False	False	False	False	False	False	False	False	False	False	False	False	False	False	False	False	False	False	False	False	False	False
chrI	802009	802160	chrI	802006	802157	other_element	no_transcription	no_transcription	.	.	.	.	.	.	.	.	802144	802024	802141	802021	False	False	False	False	False	False	False	False	False	False	False	False	False	False	False	False	False	False	False	False	False	False	False	False	False	False	False	False	False
chrI	803805	803956	chrI	803802	803953	putative_enhancer	no_transcription	transcription_initiation	.	.	.	.	.	.	WBGene00022518	zfh-2	803940	803905	803937	803902	False	True	False	False	False	False	False	False	False	False	False	False	False	False	False	False	False	False	False	False	False	False	False	False	False	False	False	False	False
chrI	806914	807065	chrI	806911	807062	putative_enhancer	no_transcription	transcription_initiation	.	.	.	.	.	.	WBGene00022518	zfh-2	807049	806910	807046	806907	False	True	False	False	False	False	False	False	False	False	False	False	False	False	False	False	False	False	False	False	False	False	False	False	False	False	False	False	False
chrI	807659	807810	chrI	807656	807807	putative_enhancer	transcription_initiation	no_transcription	.	.	.	.	.	.	WBGene00022518	zfh-2	807795	807674	807792	807671	True	False	False	False	False	False	False	False	False	False	False	False	False	False	False	False	False	False	False	False	False	False	True	False	False	False	False	False	False
chrI	809011	809162	chrI	809008	809159	putative_enhancer	transcription_initiation	transcription_initiation	.	.	.	.	.	.	WBGene00022518	zfh-2	809140	809038	809137	809035	True	True	False	False	False	False	False	False	False	False	False	False	False	False	False	False	False	False	False	False	False	False	False	False	False	False	False	False	False
chrI	809243	809394	chrI	809240	809391	putative_enhancer	transcription_initiation	transcription_initiation	.	.	.	.	.	.	WBGene00022518	zfh-2	809425	809404	809422	809401	True	True	False	False	False	False	False	False	False	False	False	False	False	False	False	False	False	False	False	False	False	False	False	False	False	False	False	False	False
chrI	810865	811016	chrI	810862	811013	putative_enhancer	transcription_initiation	no_transcription	.	.	.	.	.	.	WBGene00022518	zfh-2	810870	810880	810867	810877	True	False	False	False	False	False	False	False	False	False	False	False	False	False	False	False	False	False	False	False	False	False	False	False	False	False	False	False	False
chrI	812295	812446	chrI	812292	812443	putative_enhancer	transcription_initiation	transcription_initiation	.	.	.	.	.	.	WBGene00022518	zfh-2	812407	812440	812404	812437	True	True	False	False	False	False	False	False	False	False	False	False	False	False	False	False	False	False	False	False	False	False	False	False	False	False	False	False	False
chrI	812616	812767	chrI	812613	812764	putative_enhancer	transcription_initiation	transcription_initiation	.	.	.	.	.	.	WBGene00022518	zfh-2	812697	812623	812694	812620	True	True	False	False	True	True	False	False	False	False	True	False	False	False	False	False	False	False	False	False	False	True	True	True	False	False	False	False	False
chrI	814026	814177	chrI	814023	814174	putative_enhancer	transcription_initiation	no_transcription	.	.	.	.	.	.	WBGene00022518	zfh-2	814130	814041	814127	814038	True	False	False	False	False	False	False	False	False	False	False	False	False	False	False	False	False	False	False	False	False	False	False	False	False	False	False	False	False
chrI	815682	815833	chrI	815679	815830	putative_enhancer	transcription_initiation	no_transcription	.	.	.	.	.	.	WBGene00022518	zfh-2	815880	815697	815877	815694	True	False	False	False	False	False	True	False	False	False	False	False	False	False	False	False	False	False	False	False	False	False	False	False	False	False	False	False	False
chrI	816061	816212	chrI	816058	816209	putative_enhancer	transcription_initiation	transcription_initiation	.	.	.	.	.	.	WBGene00022518	zfh-2	816250	816249	816247	816246	True	True	False	False	False	False	False	False	False	False	False	False	False	False	False	False	False	False	False	False	False	False	False	False	False	False	False	False	False
chrI	818191	818342	chrI	818188	818339	putative_enhancer	no_transcription	transcription_initiation	.	.	.	.	.	.	WBGene00022518	zfh-2	818326	818242	818323	818239	False	True	False	False	False	False	False	False	False	False	False	False	False	False	False	False	False	False	False	False	False	False	False	False	False	False	False	False	False
chrI	819584	819735	chrI	819581	819732	putative_enhancer	transcription_initiation	no_transcription	.	.	.	.	.	.	WBGene00022518	zfh-2	819740	819599	819737	819596	True	False	False	False	False	False	False	False	False	False	False	False	False	False	False	False	False	False	False	False	False	False	False	False	False	False	False	False	False
chrI	820087	820238	chrI	820084	820235	putative_enhancer	transcription_initiation	no_transcription	.	.	.	.	.	.	WBGene00022518	zfh-2	820264	820102	820261	820099	True	False	True	True	True	True	True	True	False	False	True	False	False	False	False	False	False	False	False	False	False	False	False	False	False	False	False	False	False
chrI	821591	821742	chrI	821588	821739	other_element	no_transcription	no_transcription	.	.	.	.	.	.	WBGene00022518	zfh-2	821726	821606	821723	821603	False	False	False	False	False	False	False	False	False	False	False	False	False	False	False	False	False	False	False	False	False	False	False	False	False	False	False	False	False
chrI	822759	822910	chrI	822756	822907	other_element	no_transcription	no_transcription	.	.	.	.	.	.	WBGene00022518	zfh-2	822894	822774	822891	822771	False	False	False	False	False	False	False	False	False	False	False	False	False	False	False	False	False	False	False	False	False	False	False	False	False	False	False	False	False
chrI	824784	824935	chrI	824781	824932	other_element	no_transcription	no_transcription	.	.	.	.	.	.	WBGene00022518	zfh-2	824919	824799	824916	824796	False	False	False	False	False	False	False	False	False	False	False	False	False	False	False	False	False	False	False	False	False	False	False	False	False	False	False	False	False
chrI	826336	826487	chrI	826333	826484	putative_enhancer	transcription_initiation	no_transcription	.	.	.	.	.	.	WBGene00022518	zfh-2	826521	826351	826518	826348	True	False	False	False	False	False	False	False	False	False	False	False	False	False	False	False	False	False	False	False	False	False	False	False	False	False	False	False	False
chrI	828048	828199	chrI	828045	828196	putative_enhancer	transcription_initiation	no_transcription	.	.	.	.	.	.	WBGene00022518	zfh-2	828233	828063	828230	828060	True	False	True	True	False	True	False	True	True	True	True	True	True	False	False	False	False	False	False	False	False	False	False	False	False	False	False	False	False
chrI	828740	828891	chrI	828737	828888	putative_enhancer	transcription_initiation	transcription_initiation	.	.	.	.	.	.	WBGene00022518	zfh-2	828849	828745	828846	828742	True	True	False	False	False	False	False	False	False	False	False	False	False	False	False	False	False	False	False	False	False	False	False	False	False	False	False	False	False
chrI	830006	830157	chrI	830003	830154	putative_enhancer	transcription_initiation	no_transcription	.	.	.	.	.	.	WBGene00022518	zfh-2	830108	830021	830105	830018	True	False	False	False	False	False	False	False	False	False	False	False	False	False	False	False	False	False	False	False	False	False	False	False	False	False	False	False	False
chrI	833960	834111	chrI	833957	834108	other_element	no_transcription	no_transcription	.	.	.	.	.	.	WBGene00022518	zfh-2	834095	833975	834092	833972	False	False	True	True	True	False	True	False	False	False	False	False	False	True	False	False	False	False	False	False	False	False	False	False	False	False	False	False	False
chrI	834631	834782	chrI	834628	834779	other_element	no_transcription	no_transcription	.	.	.	.	.	.	WBGene00022518	zfh-2	834766	834646	834763	834643	False	False	False	False	False	False	False	False	False	False	False	False	False	False	False	False	False	False	False	False	False	False	False	False	False	False	False	False	False
chrI	834836	834987	chrI	834833	834984	other_element	no_transcription	no_transcription	.	.	.	.	.	.	WBGene00022518	zfh-2	834971	834851	834968	834848	False	False	False	False	False	False	False	False	False	False	False	False	False	False	False	False	False	False	False	False	False	False	False	False	False	True	True	False	False
chrI	835337	835488	chrI	835334	835485	other_element	no_transcription	no_transcription	.	.	.	.	.	.	.	.	835472	835352	835469	835349	False	False	False	False	False	False	False	False	False	False	False	False	False	False	False	False	False	False	False	False	False	False	False	False	False	False	False	False	False
chrI	836127	836278	chrI	836124	836275	coding_promoter	coding_promoter	transcription_initiation	WBGene00022517	ZC123.1	protein_coding	.	.	.	.	.	836292	836194	836289	836191	True	True	True	False	False	True	True	False	False	False	False	False	False	False	False	False	False	False	False	False	False	False	False	False	False	False	False	False	False
chrI	840513	840664	chrI	840510	840661	other_element	no_transcription	no_transcription	.	.	.	.	.	.	WBGene00022517	ZC123.1	840648	840528	840645	840525	False	False	False	False	False	False	False	False	False	False	False	False	False	False	False	False	False	False	False	False	False	False	True	False	False	False	False	False	False
chrI	843392	843543	chrI	843389	843540	putative_enhancer	transcription_initiation	no_transcription	.	.	.	.	.	.	WBGene00022519	ZC123.4	843485	843407	843482	843404	True	False	False	False	False	False	False	False	False	False	False	False	False	True	False	False	False	False	False	False	False	False	False	False	False	False	False	False	False
chrI	849311	849462	chrI	849308	849459	putative_enhancer	transcription_initiation	transcription_initiation	.	.	.	.	.	.	WBGene00022519	ZC123.4	849469	849325	849466	849322	True	True	False	False	False	False	False	False	False	False	False	False	False	True	False	False	False	True	False	False	False	False	False	False	False	False	False	False	False
chrI	851674	851825	chrI	851671	851822	coding_promoter	coding_promoter	coding_promoter	WBGene00022388	Y95B8A.8	protein_coding	WBGene00022519	ZC123.4	protein_coding	.	.	851774	851689	851771	851686	True	True	False	True	True	True	False	False	False	False	False	False	False	False	True	False	True	False	False	False	False	False	False	False	False	True	False	False	True
chrI	852093	852244	chrI	852090	852241	putative_enhancer	transcription_initiation	no_transcription	.	.	.	.	.	.	WBGene00022388,WBGene00022519	Y95B8A.8,ZC123.4	852166	852108	852163	852105	True	False	False	False	False	False	False	False	False	False	False	False	False	False	False	False	False	False	False	False	False	False	True	False	False	False	False	False	False
chrI	852412	852563	chrI	852409	852560	coding_promoter	transcription_initiation	coding_promoter	.	.	.	WBGene00022519	ZC123.4	protein_coding	.	.	852530	852391	852527	852388	True	True	False	False	False	False	False	False	False	False	False	False	False	False	False	False	False	False	False	False	False	False	False	False	True	True	True	True	True
chrI	852722	852873	chrI	852719	852870	coding_promoter	no_transcription	coding_promoter	.	.	.	WBGene00022519	ZC123.4	protein_coding	.	.	852857	852823	852854	852820	False	True	False	False	False	False	False	False	False	False	False	False	False	False	False	False	False	False	False	False	False	False	False	False	False	True	False	False	False
chrI	853245	853396	chrI	853242	853393	coding_promoter	coding_promoter	transcription_initiation	WBGene00022388	Y95B8A.8	protein_coding	.	.	.	.	.	853404	853279	853401	853276	True	True	True	True	True	True	True	True	True	True	True	True	True	True	False	False	False	False	True	True	True	True	True	False	False	False	False	False	False
chrI	872805	872956	chrI	872802	872953	other_element	no_transcription	no_transcription	.	.	.	.	.	.	.	.	872940	872820	872937	872817	False	False	False	False	False	False	False	False	False	False	False	False	False	False	False	False	False	False	False	False	False	False	False	False	False	False	False	False	False
chrI	873095	873246	chrI	873092	873243	other_element	no_transcription	no_transcription	.	.	.	.	.	.	WBGene00022389	pde-6	873230	873110	873227	873107	False	False	False	False	False	False	False	False	False	False	False	False	False	False	False	False	False	False	False	False	False	False	False	False	False	False	False	False	False
chrI	879863	880014	chrI	879860	880011	coding_promoter	coding_promoter	transcription_initiation	WBGene00022386	Y95B8A.6	protein_coding	.	.	.	.	.	880035	879971	880032	879968	True	True	False	True	True	True	False	False	True	False	False	False	False	False	False	False	True	False	False	True	False	False	True	False	False	False	False	False	False
chrI	880230	880381	chrI	880227	880378	other_element	no_transcription	no_transcription	.	.	.	.	.	.	WBGene00022386,WBGene00022389	Y95B8A.6,pde-6	880365	880245	880362	880242	False	False	False	False	False	False	False	False	False	False	False	False	False	False	False	False	False	False	False	False	True	False	False	False	False	False	False	False	False
chrI	881484	881635	chrI	881481	881632	coding_promoter	coding_promoter	transcription_initiation	WBGene00022386	Y95B8A.6	protein_coding	.	.	.	.	.	881584	881435	881581	881432	True	True	False	True	True	False	True	False	False	False	False	False	False	True	False	False	False	False	True	False	False	False	True	False	False	False	False	False	False
chrI	881830	881981	chrI	881827	881978	putative_enhancer	transcription_initiation	transcription_initiation	.	.	.	.	.	.	WBGene00022386,WBGene00022389	Y95B8A.6,pde-6	881948	881812	881945	881809	True	True	False	False	False	False	False	False	False	False	False	False	False	False	False	False	False	False	False	False	False	False	False	False	False	False	False	False	False
chrI	882557	882708	chrI	882554	882705	coding_promoter	coding_promoter	transcription_initiation	WBGene00022386	Y95B8A.6	protein_coding	.	.	.	.	.	882641	882557	882638	882554	True	True	False	False	False	False	False	False	False	False	False	False	False	False	False	False	False	False	True	False	False	False	False	False	True	True	True	True	True
chrI	882753	882904	chrI	882750	882901	coding_promoter	coding_promoter	coding_promoter	WBGene00022386	Y95B8A.6	protein_coding	WBGene00022389	pde-6	protein_coding	.	.	882919	882862	882916	882859	True	True	True	True	True	True	True	True	True	True	True	True	True	False	False	False	False	False	False	True	False	False	False	True	True	True	True	True	True
chrI	882949	883100	chrI	882946	883097	coding_promoter	coding_promoter	transcription_initiation	WBGene00022386	Y95B8A.6	protein_coding	.	.	.	.	.	883016	882935	883013	882932	True	True	False	True	True	True	True	True	True	False	False	False	True	False	False	False	False	False	False	False	False	False	False	False	False	False	False	False	False
chrI	884468	884619	chrI	884465	884616	putative_enhancer	transcription_initiation	transcription_initiation	.	.	.	.	.	.	WBGene00022386	Y95B8A.6	884637	884599	884634	884596	True	True	False	False	False	False	False	False	False	False	False	False	False	False	False	False	False	False	False	False	False	False	False	False	False	False	False	False	False
chrI	884726	884877	chrI	884723	884874	putative_enhancer	transcription_initiation	no_transcription	.	.	.	.	.	.	WBGene00022386	Y95B8A.6	884851	884741	884848	884738	True	False	False	False	False	False	False	False	False	False	False	False	False	False	False	False	False	False	False	False	False	False	False	False	False	True	False	False	False
chrI	885398	885549	chrI	885395	885546	other_element	no_transcription	no_transcription	.	.	.	.	.	.	WBGene00022386	Y95B8A.6	885533	885413	885530	885410	False	False	False	False	False	False	False	False	False	False	False	False	False	False	False	False	False	False	False	False	False	False	False	False	False	False	False	False	False
chrI	886380	886531	chrI	886377	886528	other_element	no_transcription	no_transcription	.	.	.	.	.	.	WBGene00022386	Y95B8A.6	886515	886395	886512	886392	False	False	False	False	False	False	False	False	False	False	True	False	False	False	False	False	False	False	False	False	False	False	False	False	False	False	False	False	False
chrI	887885	888036	chrI	887882	888033	putative_enhancer	no_transcription	transcription_initiation	.	.	.	.	.	.	WBGene00022386	Y95B8A.6	888020	887937	888017	887934	False	True	False	False	False	False	False	False	False	False	False	True	False	False	False	False	False	False	False	False	False	False	False	False	False	False	False	False	False
chrI	890325	890476	chrI	890322	890473	putative_enhancer	transcription_initiation	no_transcription	.	.	.	.	.	.	WBGene00022390	him-19	890483	890340	890480	890337	True	False	False	False	False	False	False	False	False	False	False	False	False	False	False	False	False	True	False	False	False	False	False	False	False	False	False	False	False
chrI	890777	890928	chrI	890774	890925	other_element	no_transcription	no_transcription	.	.	.	.	.	.	WBGene00022390	him-19	890912	890792	890909	890789	False	False	False	False	False	False	False	False	False	False	False	False	False	False	False	False	False	False	False	False	False	False	False	False	False	False	False	False	False
chrI	895033	895184	chrI	895030	895181	coding_promoter	transcription_initiation	coding_promoter	.	.	.	WBGene00022390	him-19	protein_coding	.	.	895177	895032	895174	895029	True	True	False	False	False	False	False	False	False	False	False	False	False	False	False	False	False	True	True	False	False	False	False	False	True	True	False	True	True
chrI	896002	896153	chrI	895999	896150	coding_promoter	transcription_initiation	coding_promoter	.	.	.	WBGene00022390	him-19	protein_coding	.	.	896088	896065	896085	896062	True	True	False	False	False	False	False	False	False	False	False	False	False	False	False	False	False	False	False	False	False	False	False	False	True	True	True	True	True
chrI	907034	907185	chrI	907031	907182	other_element	no_transcription	no_transcription	.	.	.	.	.	.	.	.	907169	907049	907166	907046	False	False	False	False	False	False	False	False	False	False	False	False	False	False	False	False	False	False	False	False	False	False	False	False	False	False	False	False	False
chrI	920499	920650	chrI	920496	920647	other_element	no_transcription	no_transcription	.	.	.	.	.	.	WBGene00022391	Y95B8A.12	920634	920514	920631	920511	False	False	False	False	False	False	False	False	False	False	False	False	False	False	False	False	False	False	False	False	False	False	False	False	False	False	False	False	False
chrI	927120	927271	chrI	927117	927268	putative_enhancer	transcription_initiation	transcription_initiation	.	.	.	.	.	.	WBGene00022391	Y95B8A.12	927146	927103	927143	927100	True	True	False	False	False	False	False	False	False	False	False	False	False	False	False	False	False	False	False	False	False	False	False	False	False	False	False	False	False
chrI	929718	929869	chrI	929715	929866	coding_promoter	transcription_initiation	coding_promoter	.	.	.	WBGene00022391	Y95B8A.12	protein_coding	.	.	929852	929716	929849	929713	True	True	False	False	False	False	False	False	False	False	False	False	False	False	False	False	False	False	False	False	False	False	False	False	True	True	True	True	True
chrI	935117	935268	chrI	935114	935265	coding_promoter	coding_promoter	transcription_initiation	WBGene00022383	Y95B8A.2	protein_coding	.	.	.	.	.	935260	935164	935257	935161	True	True	False	False	True	False	False	False	False	False	False	False	False	False	False	True	False	False	False	False	False	False	True	False	False	False	False	False	False
chrI	935782	935933	chrI	935779	935930	putative_enhancer	transcription_initiation	no_transcription	.	.	.	.	.	.	WBGene00022383,WBGene00022391	Y95B8A.12,Y95B8A.2	935932	935797	935929	935794	True	False	False	False	False	False	False	False	False	False	False	False	False	False	False	False	False	False	False	False	False	False	False	True	False	False	False	False	False
chrI	936633	936784	chrI	936630	936781	coding_promoter	coding_promoter	transcription_initiation	WBGene00022383	Y95B8A.2	protein_coding	.	.	.	.	.	936807	936613	936804	936610	True	True	False	False	True	False	False	False	False	False	False	False	False	False	False	False	False	False	False	True	False	False	False	False	False	False	False	False	False
chrI	938410	938561	chrI	938407	938558	coding_promoter	coding_promoter	no_transcription	WBGene00022383	Y95B8A.2	protein_coding	.	.	.	.	.	938496	938425	938493	938422	True	False	True	False	False	False	False	False	True	False	False	False	False	False	False	False	False	False	False	True	False	False	False	True	False	False	False	False	False
chrI	939603	939754	chrI	939600	939751	other_element	no_transcription	no_transcription	.	.	.	.	.	.	WBGene00022383,WBGene00022391	Y95B8A.12,Y95B8A.2	939738	939618	939735	939615	False	False	False	False	False	False	False	False	False	False	False	False	False	False	False	False	False	False	False	False	False	False	False	False	False	False	False	False	False
chrI	946069	946220	chrI	946066	946217	non-coding_RNA	no_transcription	non-coding_RNA	.	.	.	WBGene00023199	Y95B8A.t1	tRNA	.	.	946204	946084	946201	946081	False	False	False	False	False	False	False	False	False	False	False	False	False	False	False	False	False	False	False	False	False	False	False	False	False	False	False	False	False
chrI	946458	946609	chrI	946455	946606	other_element	no_transcription	no_transcription	.	.	.	.	.	.	WBGene00003548	nas-30	946593	946473	946590	946470	False	False	False	False	False	False	False	False	False	False	False	False	False	False	False	False	False	False	False	False	False	False	False	False	False	False	False	False	False
chrI	954459	954610	chrI	954456	954607	unassigned_promoter	unassigned_promoter	transcription_initiation	.	.	.	.	.	.	WBGene00003238	mig-1	954611	954590	954608	954587	True	True	False	False	True	False	False	False	False	False	False	False	False	False	False	True	False	False	False	False	False	False	False	True	False	False	False	False	False
chrI	954980	955131	chrI	954977	955128	putative_enhancer	no_transcription	transcription_initiation	.	.	.	.	.	.	WBGene00003238	mig-1	955115	954997	955112	954994	False	True	False	False	False	False	False	False	False	False	False	False	False	False	False	False	False	False	False	False	False	False	False	False	True	True	True	True	True
chrI	955271	955422	chrI	955268	955419	putative_enhancer	no_transcription	transcription_initiation	.	.	.	.	.	.	WBGene00003238	mig-1	955406	955314	955403	955311	False	True	False	False	False	False	False	False	False	False	False	False	False	False	False	True	False	False	False	False	False	False	False	False	False	False	False	False	False
chrI	955531	955682	chrI	955528	955679	putative_enhancer	transcription_initiation	no_transcription	.	.	.	.	.	.	WBGene00003238	mig-1	955672	955546	955669	955543	True	False	False	False	False	False	False	False	False	False	False	False	False	False	False	False	False	False	False	False	False	False	False	False	False	False	False	False	False
chrI	957437	957588	chrI	957434	957585	coding_promoter	transcription_initiation	coding_promoter	.	.	.	WBGene00003238	mig-1	protein_coding	.	.	957533	957469	957530	957466	True	True	False	False	False	False	False	False	False	False	False	False	False	False	False	True	False	False	False	False	False	False	False	False	True	True	True	True	True
chrI	959975	960126	chrI	959972	960123	other_element	no_transcription	no_transcription	.	.	.	.	.	.	.	.	960110	959990	960107	959987	False	False	False	False	False	False	False	False	False	False	False	False	False	False	False	False	False	False	False	False	False	False	False	False	False	False	False	False	False
chrI	961340	961491	chrI	961337	961488	unassigned_promoter	unassigned_promoter	transcription_initiation	.	.	.	.	.	.	.	.	961438	961298	961435	961295	True	True	False	False	True	False	False	False	False	False	False	False	False	False	False	True	False	False	False	False	False	False	False	False	False	False	False	False	False
chrI	961544	961695	chrI	961541	961692	unassigned_promoter	unassigned_promoter	transcription_initiation	.	.	.	.	.	.	.	.	961702	961622	961699	961619	True	True	False	True	True	True	True	False	False	False	True	True	True	False	False	False	False	True	True	False	False	True	True	True	False	False	False	False	False
chrI	963616	963767	chrI	963613	963764	putative_enhancer	transcription_initiation	transcription_initiation	.	.	.	.	.	.	WBGene00018787	cutl-20	963799	963637	963796	963634	True	True	False	False	False	False	False	False	False	False	False	False	False	False	False	False	False	False	False	False	False	False	False	False	False	False	False	False	False
chrI	963975	964126	chrI	963972	964123	putative_enhancer	transcription_initiation	transcription_initiation	.	.	.	.	.	.	WBGene00018787	cutl-20	964166	963956	964163	963953	True	True	False	False	False	False	False	False	False	False	False	False	False	False	False	False	False	False	False	False	False	False	False	False	False	False	False	False	False
chrI	969147	969298	chrI	969144	969295	putative_enhancer	no_transcription	transcription_initiation	.	.	.	.	.	.	WBGene00018787,WBGene00018788	cutl-20,shc-1	969282	969316	969279	969313	False	True	False	False	False	False	False	False	False	False	False	False	False	False	False	False	False	False	False	False	False	False	False	False	False	False	False	False	False
chrI	969423	969574	chrI	969420	969571	putative_enhancer	no_transcription	transcription_initiation	.	.	.	.	.	.	WBGene00018787,WBGene00018788	cutl-20,shc-1	969558	969454	969555	969451	False	True	False	False	False	False	False	False	False	False	False	False	False	False	False	False	False	False	False	False	False	False	False	False	False	False	False	False	False
chrI	973143	973294	chrI	973140	973291	coding_promoter	no_transcription	coding_promoter	.	.	.	WBGene00018788	shc-1	protein_coding	.	.	973278	973137	973275	973134	False	True	False	False	False	False	False	False	False	False	False	False	False	False	False	False	False	False	False	False	False	False	False	False	True	True	True	True	True
chrI	973786	973937	chrI	973783	973934	coding_promoter	transcription_initiation	coding_promoter	.	.	.	WBGene00018788	shc-1	protein_coding	.	.	973855	973801	973852	973798	True	False	False	False	False	False	False	False	False	False	False	False	False	False	False	False	False	False	False	False	False	False	False	False	False	False	True	True	True
chrI	978265	978416	chrI	978262	978413	coding_promoter	coding_promoter	transcription_initiation	WBGene00018786	hmbx-1	protein_coding	.	.	.	.	.	978412	978334	978409	978331	True	True	False	False	False	False	False	False	False	False	False	False	False	False	False	True	False	False	False	False	False	False	False	False	False	False	False	False	False
chrI	978675	978826	chrI	978672	978823	coding_promoter	coding_promoter	no_transcription	WBGene00018786	hmbx-1	protein_coding	.	.	.	.	.	978810	978690	978807	978687	False	False	False	False	False	True	False	False	False	False	False	False	False	False	False	False	True	False	False	False	False	False	False	False	False	False	False	True	False
chrI	979547	979698	chrI	979544	979695	putative_enhancer	transcription_initiation	transcription_initiation	.	.	.	.	.	.	WBGene00018786	hmbx-1	979656	979641	979653	979638	True	True	False	False	False	False	False	False	False	False	False	False	False	False	False	False	False	False	True	False	False	False	False	False	False	False	False	False	False
chrI	983080	983231	chrI	983077	983228	putative_enhancer	transcription_initiation	transcription_initiation	.	.	.	.	.	.	WBGene00018786	hmbx-1	983158	983130	983155	983127	True	True	False	False	False	False	False	False	False	False	False	False	False	False	False	False	False	False	False	False	False	False	False	False	False	False	False	False	False
chrI	984446	984597	chrI	984443	984594	coding_promoter	coding_promoter	transcription_initiation	WBGene00018786	hmbx-1	protein_coding	.	.	.	.	.	984563	984454	984560	984451	True	True	False	False	True	False	False	False	False	False	False	False	False	False	False	False	False	False	False	False	False	False	False	False	False	False	False	False	False
chrI	985074	985225	chrI	985071	985222	coding_promoter	coding_promoter	transcription_initiation	WBGene00018786	hmbx-1	protein_coding	.	.	.	.	.	985067	985167	985064	985164	True	True	False	False	True	False	False	False	False	False	False	False	False	False	False	False	False	False	False	False	False	False	False	False	False	False	False	False	False
chrI	985972	986123	chrI	985969	986120	other_element	no_transcription	no_transcription	.	.	.	.	.	.	WBGene00018786	hmbx-1	986107	985987	986104	985984	False	False	False	False	False	False	False	False	False	False	False	False	False	False	False	False	False	False	True	False	False	False	True	False	False	False	False	False	False
chrI	986797	986948	chrI	986794	986945	unassigned_promoter	transcription_initiation	unassigned_promoter	.	.	.	.	.	.	WBGene00018786	hmbx-1	986911	986837	986908	986834	True	True	False	False	False	False	False	False	False	False	False	False	False	False	False	False	False	False	False	False	False	False	False	False	False	False	True	False	False
chrI	987655	987806	chrI	987652	987803	coding_promoter	coding_promoter	transcription_initiation	WBGene00018786	hmbx-1	protein_coding	.	.	.	.	.	987812	987748	987809	987745	True	True	False	False	True	True	False	False	False	False	False	False	False	True	False	False	False	False	False	False	False	False	False	False	False	False	False	False	False
chrI	989005	989156	chrI	989002	989153	coding_promoter	coding_promoter	transcription_initiation	WBGene00018786	hmbx-1	protein_coding	.	.	.	.	.	989142	988981	989139	988978	True	True	False	False	True	False	False	False	False	False	False	False	False	False	False	False	False	False	False	False	False	False	False	False	False	False	False	False	False
chrI	990408	990559	chrI	990405	990556	other_element	no_transcription	no_transcription	.	.	.	.	.	.	WBGene00018786	hmbx-1	990543	990423	990540	990420	False	False	True	False	False	False	False	True	False	False	False	False	False	False	False	False	False	False	False	False	False	False	False	False	False	False	False	False	False
chrI	998486	998637	chrI	998483	998634	other_element	no_transcription	no_transcription	.	.	.	.	.	.	WBGene00016932	C54G6.3	998621	998501	998618	998498	False	False	False	False	False	False	False	False	False	False	False	False	False	False	False	False	False	False	False	False	False	False	False	False	False	False	False	False	False
chrI	999210	999361	chrI	999207	999358	putative_enhancer	transcription_initiation	no_transcription	.	.	.	.	.	.	WBGene00016932	C54G6.3	999361	999225	999358	999222	True	False	False	False	False	False	False	False	False	False	False	False	False	False	False	False	False	False	False	False	False	False	False	False	False	False	False	False	False
chrI	999994	1000145	chrI	999991	1000142	other_element	no_transcription	no_transcription	.	.	.	.	.	.	WBGene00016932	C54G6.3	1000129	1000009	1000126	1000006	False	False	False	False	False	False	False	False	False	False	False	False	False	False	False	False	False	False	False	False	False	False	False	False	False	False	False	False	False
chrI	1000900	1001051	chrI	1000897	1001048	putative_enhancer	no_transcription	transcription_initiation	.	.	.	.	.	.	WBGene00016932	C54G6.3	1001035	1001069	1001032	1001066	False	True	False	False	False	False	False	False	False	False	False	False	False	False	False	False	False	False	False	False	False	False	False	False	False	False	False	False	False
chrI	1006007	1006158	chrI	1006004	1006155	putative_enhancer	transcription_initiation	transcription_initiation	.	.	.	.	.	.	WBGene00016931	C54G6.2	1006162	1006058	1006159	1006055	True	True	True	True	True	True	False	False	False	False	False	False	False	True	False	False	False	True	False	False	False	False	False	False	False	False	False	False	False
chrI	1014420	1014571	chrI	1014417	1014568	coding_promoter	no_transcription	coding_promoter	.	.	.	WBGene00016930	madf-6	protein_coding	.	.	1014555	1014435	1014552	1014432	False	False	False	False	False	False	False	False	False	False	False	False	False	False	False	False	False	False	False	False	False	False	False	False	True	True	True	True	True
chrI	1014580	1014731	chrI	1014577	1014728	coding_promoter	coding_promoter	no_transcription	WBGene00005002	spp-17	protein_coding	.	.	.	.	.	1014668	1014595	1014665	1014592	True	False	False	False	False	False	False	False	False	False	False	False	False	False	False	True	True	False	False	False	False	False	False	False	False	False	False	False	False
chrI	1015051	1015202	chrI	1015048	1015199	coding_promoter	coding_promoter	no_transcription	WBGene00005002	spp-17	protein_coding	.	.	.	.	.	1015230	1015066	1015227	1015063	True	False	False	True	True	True	False	True	True	False	False	False	False	False	False	False	False	False	True	True	False	False	False	False	False	False	False	False	False
chrI	1016953	1017104	chrI	1016950	1017101	putative_enhancer	transcription_initiation	no_transcription	.	.	.	.	.	.	WBGene00005002	spp-17	1017074	1016968	1017071	1016965	True	False	False	False	False	False	False	False	False	False	False	False	False	False	False	False	False	False	False	False	False	False	False	False	False	False	False	False	False
chrI	1017495	1017646	chrI	1017492	1017643	coding_promoter	coding_promoter	transcription_initiation	WBGene00021335	spp-23	protein_coding	.	.	.	.	.	1017687	1017525	1017684	1017522	True	True	False	True	True	True	True	True	True	False	False	False	False	False	False	True	True	True	True	True	False	True	False	False	False	False	False	False	False
chrI	1018922	1019073	chrI	1018919	1019070	putative_enhancer	transcription_initiation	transcription_initiation	.	.	.	.	.	.	WBGene00021335	spp-23	1019054	1019052	1019051	1019049	True	True	False	False	False	False	False	False	False	False	False	False	False	False	False	False	False	False	False	False	False	False	False	False	False	False	False	False	False
chrI	1021518	1021669	chrI	1021515	1021666	other_element	no_transcription	no_transcription	.	.	.	.	.	.	WBGene00021327	mrpl-38	1021653	1021533	1021650	1021530	False	False	False	False	False	False	False	False	False	False	False	False	False	False	False	False	False	False	False	False	False	False	False	False	False	False	False	False	False
chrI	1022186	1022337	chrI	1022183	1022334	other_element	no_transcription	no_transcription	.	.	.	.	.	.	WBGene00021327	mrpl-38	1022321	1022201	1022318	1022198	False	False	False	False	False	False	False	False	False	False	False	False	False	False	False	False	False	False	False	False	False	False	False	False	False	False	False	False	False
chrI	1029726	1029877	chrI	1029723	1029874	putative_enhancer	transcription_initiation	transcription_initiation	.	.	.	.	.	.	WBGene00021327	mrpl-38	1029776	1029784	1029773	1029781	True	True	False	False	False	False	False	False	False	False	False	False	False	False	False	False	False	False	False	False	False	False	False	False	False	False	False	False	False
chrI	1030102	1030253	chrI	1030099	1030250	coding_promoter	coding_promoter	coding_promoter	WBGene00021329	Y34D9A.3	protein_coding	WBGene00021327	mrpl-38	protein_coding	.	.	1030167	1030112	1030164	1030109	True	True	False	False	True	False	False	False	False	False	False	False	False	False	True	True	True	False	True	False	False	False	False	False	False	False	False	True	False
chrI	1030886	1031037	chrI	1030883	1031034	putative_enhancer	transcription_initiation	transcription_initiation	.	.	.	.	.	.	WBGene00004952,WBGene00021329	Y34D9A.3,spd-1	1030979	1031007	1030976	1031004	True	True	False	False	False	False	False	False	False	False	False	False	False	False	False	False	False	False	False	False	False	True	False	False	False	False	False	False	False
chrI	1031895	1032046	chrI	1031892	1032043	coding_promoter	coding_promoter	transcription_initiation	WBGene00021329	Y34D9A.3	protein_coding	.	.	.	.	.	1031909	1032045	1031906	1032042	True	True	False	False	False	False	False	False	False	False	False	False	False	False	False	False	False	True	True	False	False	False	True	False	False	False	False	False	False
chrI	1033597	1033748	chrI	1033594	1033745	coding_promoter	coding_promoter	coding_promoter	WBGene00021329	Y34D9A.3	protein_coding	WBGene00004952	spd-1	protein_coding	.	.	1033699	1033594	1033696	1033591	True	True	False	False	False	False	False	False	False	False	False	False	False	False	False	False	False	False	False	False	False	True	False	False	True	True	True	True	True
chrI	1033945	1034096	chrI	1033942	1034093	coding_promoter	no_transcription	coding_promoter	.	.	.	WBGene00004952	spd-1	protein_coding	.	.	1034080	1033957	1034077	1033954	False	True	False	False	False	False	False	False	False	False	False	False	False	True	False	False	False	False	False	False	False	False	False	False	False	False	False	False	False
chrI	1034295	1034446	chrI	1034292	1034443	coding_promoter	coding_promoter	coding_promoter	WBGene00021329	Y34D9A.3	protein_coding	WBGene00004952	spd-1	protein_coding	.	.	1034455	1034296	1034452	1034293	True	True	True	True	True	True	True	True	False	False	True	True	False	False	False	False	False	False	False	False	False	False	True	False	False	True	True	True	False
chrI	1038262	1038413	chrI	1038259	1038410	putative_enhancer	transcription_initiation	transcription_initiation	.	.	.	.	.	.	WBGene00021329	Y34D9A.3	1038411	1038316	1038408	1038313	True	True	False	False	False	False	False	False	False	False	False	False	False	False	False	False	False	False	False	False	False	False	False	False	False	False	False	False	False
chrI	1041021	1041172	chrI	1041018	1041169	coding_promoter	coding_promoter	no_transcription	WBGene00021332	Y34D9A.7	protein_coding	.	.	.	.	.	1041156	1041036	1041153	1041033	False	False	False	False	False	False	False	False	False	False	False	False	False	False	False	False	False	False	False	False	False	False	False	False	False	False	False	False	False
chrI	1046390	1046541	chrI	1046387	1046538	putative_enhancer	transcription_initiation	no_transcription	.	.	.	.	.	.	WBGene00021332	Y34D9A.7	1046538	1046405	1046535	1046402	True	False	False	False	False	False	False	False	False	False	False	False	False	False	False	False	False	False	False	False	False	False	False	False	False	False	False	False	False
chrI	1049227	1049378	chrI	1049224	1049375	coding_promoter	coding_promoter	unassigned_promoter	WBGene00021331	glrx-10	protein_coding	.	.	.	.	.	1049408	1049377	1049405	1049374	True	True	False	False	False	False	False	False	False	True	False	False	True	False	False	False	False	False	False	False	True	False	False	False	False	False	False	True	False
chrI	1050439	1050590	chrI	1050436	1050587	putative_enhancer	transcription_initiation	no_transcription	.	.	.	.	.	.	WBGene00021331	glrx-10	1050420	1050454	1050417	1050451	True	False	False	False	False	False	False	False	False	False	False	False	False	False	False	False	False	False	False	False	False	False	False	False	False	False	False	False	False
chrI	1051893	1052044	chrI	1051890	1052041	putative_enhancer	transcription_initiation	transcription_initiation	.	.	.	.	.	.	WBGene00021333	Y34D9A.8	1051974	1051965	1051971	1051962	True	True	False	False	False	False	False	False	False	False	False	False	False	False	False	False	False	False	False	False	False	False	False	False	False	False	False	False	False
chrI	1052224	1052375	chrI	1052221	1052372	coding_promoter	no_transcription	coding_promoter	.	.	.	WBGene00021333	Y34D9A.8	protein_coding	.	.	1052359	1052210	1052356	1052207	False	True	False	False	True	False	False	False	False	False	False	False	True	True	False	False	True	False	True	False	True	True	False	True	False	False	False	False	False
chrI	1053703	1053854	chrI	1053700	1053851	putative_enhancer	transcription_initiation	transcription_initiation	.	.	.	.	.	.	WBGene00021333	Y34D9A.8	1053877	1053735	1053874	1053732	True	True	False	False	False	False	False	False	False	False	False	False	False	False	False	False	False	False	False	False	False	False	False	False	False	False	False	False	False
chrI	1062079	1062230	chrI	1062076	1062227	coding_promoter	coding_promoter	transcription_initiation	WBGene00021328	npr-23	protein_coding	.	.	.	.	.	1062276	1062105	1062273	1062102	True	True	True	True	True	True	True	False	False	False	False	True	False	True	False	False	False	False	False	False	False	True	True	False	False	False	False	False	False
chrI	1067065	1067216	chrI	1067062	1067213	coding_promoter	transcription_initiation	coding_promoter	.	.	.	WBGene00021334	vps-4	protein_coding	.	.	1067204	1067105	1067201	1067102	True	True	False	False	False	False	False	False	False	False	False	False	False	False	False	False	False	False	False	False	False	False	False	False	True	True	True	True	True
chrI	1068179	1068330	chrI	1068176	1068327	coding_promoter	coding_promoter	coding_promoter	WBGene00001745	gsa-1	protein_coding	WBGene00021334	vps-4	protein_coding	.	.	1068364	1068223	1068361	1068220	True	True	False	False	True	False	False	False	False	False	False	False	False	False	False	True	False	False	False	False	False	False	False	False	False	True	False	False	False
chrI	1068402	1068553	chrI	1068399	1068550	coding_promoter	coding_promoter	transcription_initiation	WBGene00001745	gsa-1	protein_coding	.	.	.	.	.	1068582	1068385	1068579	1068382	True	True	True	True	True	True	True	True	True	True	True	True	True	False	False	False	False	False	True	True	False	True	False	True	False	False	False	False	False
chrI	1069243	1069394	chrI	1069240	1069391	putative_enhancer	transcription_initiation	transcription_initiation	.	.	.	.	.	.	WBGene00001745,WBGene00021334	gsa-1,vps-4	1069406	1069228	1069403	1069225	True	True	True	False	False	False	False	True	True	False	True	True	False	False	False	False	False	False	False	False	False	False	False	False	False	False	False	False	False
chrI	1069666	1069817	chrI	1069663	1069814	coding_promoter	transcription_initiation	coding_promoter	.	.	.	WBGene00021334	vps-4	protein_coding	.	.	1069842	1069710	1069839	1069707	True	True	False	False	False	False	False	False	False	False	False	False	False	False	False	False	False	False	False	False	False	False	False	False	False	True	True	False	True
chrI	1070008	1070159	chrI	1070005	1070156	putative_enhancer	transcription_initiation	transcription_initiation	.	.	.	.	.	.	WBGene00001745	gsa-1	1070164	1070049	1070161	1070046	True	True	True	False	False	False	False	False	False	False	False	False	True	False	False	False	False	False	False	False	False	False	False	False	False	False	False	False	False
chrI	1077334	1077485	chrI	1077331	1077482	putative_enhancer	transcription_initiation	transcription_initiation	.	.	.	.	.	.	.	.	1077499	1077352	1077496	1077349	True	True	False	False	False	False	False	False	False	False	False	False	False	False	False	False	False	False	False	False	False	False	False	False	False	False	False	False	False
chrI	1082504	1082655	chrI	1082501	1082652	unassigned_promoter	no_transcription	unassigned_promoter	.	.	.	.	.	.	.	.	1082639	1082522	1082636	1082519	False	True	False	False	False	False	False	False	False	False	False	False	False	False	False	False	False	False	False	False	False	False	False	False	False	False	True	True	True
chrI	1090418	1090569	chrI	1090415	1090566	other_element	no_transcription	no_transcription	.	.	.	.	.	.	WBGene00019911	R06A10.4	1090553	1090433	1090550	1090430	False	False	False	False	False	False	False	False	False	False	False	False	False	False	False	False	False	False	False	False	False	False	False	False	False	False	False	False	False
chrI	1095642	1095793	chrI	1095639	1095790	putative_enhancer	no_transcription	transcription_initiation	.	.	.	.	.	.	WBGene00019911	R06A10.4	1095777	1095743	1095774	1095740	False	True	False	False	False	False	False	False	False	False	False	False	False	False	False	False	False	False	False	False	False	False	False	False	False	False	False	False	False
chrI	1096048	1096199	chrI	1096045	1096196	putative_enhancer	no_transcription	transcription_initiation	.	.	.	.	.	.	WBGene00019911	R06A10.4	1096183	1096020	1096180	1096017	False	True	False	False	False	False	False	False	False	False	False	False	False	False	False	False	False	False	False	False	False	False	False	False	False	False	False	False	False
chrI	1099193	1099344	chrI	1099190	1099341	putative_enhancer	transcription_initiation	no_transcription	.	.	.	.	.	.	WBGene00019911	R06A10.4	1099280	1099208	1099277	1099205	True	False	False	False	False	False	False	False	False	False	False	False	False	False	True	True	False	False	False	False	False	False	True	False	False	False	False	False	False
chrI	1100709	1100860	chrI	1100706	1100857	coding_promoter	transcription_initiation	coding_promoter	.	.	.	WBGene00019911	R06A10.4	protein_coding	.	.	1100809	1100700	1100806	1100697	True	True	False	False	False	False	False	False	False	False	False	False	False	True	False	False	False	False	False	False	False	False	False	False	False	False	True	False	False
chrI	1102268	1102419	chrI	1102265	1102416	putative_enhancer	no_transcription	transcription_initiation	.	.	.	.	.	.	WBGene00019911	R06A10.4	1102403	1102280	1102400	1102277	False	True	False	False	False	False	False	False	False	False	False	False	False	False	False	False	False	False	False	False	False	False	False	False	False	False	False	False	False
chrI	1103392	1103543	chrI	1103389	1103540	putative_enhancer	no_transcription	transcription_initiation	.	.	.	.	.	.	WBGene00019911	R06A10.4	1103527	1103364	1103524	1103361	False	True	False	False	False	False	False	False	False	False	False	False	False	False	False	False	False	False	False	False	False	False	False	False	False	False	False	False	False
chrI	1106517	1106668	chrI	1106514	1106665	coding_promoter	coding_promoter	coding_promoter	WBGene00022838	ZK993.2	protein_coding	WBGene00019911	R06A10.4	protein_coding	.	.	1106623	1106532	1106620	1106529	True	False	False	False	True	False	False	False	False	False	False	False	False	False	False	True	False	False	False	False	False	False	False	False	False	True	True	True	True
chrI	1110597	1110748	chrI	1110594	1110745	putative_enhancer	transcription_initiation	transcription_initiation	.	.	.	.	.	.	WBGene00022838	ZK993.2	1110739	1110603	1110736	1110600	True	True	False	False	False	False	False	False	False	False	False	False	False	False	False	False	False	False	False	False	False	False	False	False	False	False	False	False	False
chrI	1112332	1112483	chrI	1112329	1112480	coding_promoter	coding_promoter	no_transcription	WBGene00236809	ZK993.5	protein_coding	.	.	.	.	.	1112403	1112347	1112400	1112344	True	False	False	False	False	False	False	False	False	False	False	False	False	False	False	False	False	False	False	False	False	False	False	False	False	False	False	False	False
chrI	1119269	1119420	chrI	1119266	1119417	other_element	no_transcription	no_transcription	.	.	.	.	.	.	.	.	1119404	1119284	1119401	1119281	False	False	False	False	False	False	False	False	False	False	False	False	False	False	False	False	False	False	False	False	False	False	False	False	False	False	False	False	False
chrI	1125001	1125152	chrI	1124998	1125149	other_element	no_transcription	no_transcription	.	.	.	.	.	.	.	.	1125136	1125016	1125133	1125013	False	False	False	False	False	False	False	False	False	False	False	False	False	False	False	False	False	False	False	False	False	False	False	False	False	False	False	False	False
chrI	1126314	1126465	chrI	1126311	1126462	putative_enhancer	transcription_initiation	no_transcription	.	.	.	.	.	.	.	.	1126475	1126329	1126472	1126326	True	False	False	False	False	False	False	False	False	False	False	False	False	False	False	False	False	False	False	False	False	False	False	False	False	False	False	False	False
chrI	1127094	1127245	chrI	1127091	1127242	putative_enhancer	transcription_initiation	no_transcription	.	.	.	.	.	.	.	.	1127227	1127109	1127224	1127106	True	False	False	False	False	False	False	False	False	False	False	False	False	False	False	False	False	False	False	False	False	False	False	False	False	False	False	False	False
chrI	1128200	1128351	chrI	1128197	1128348	putative_enhancer	transcription_initiation	transcription_initiation	.	.	.	.	.	.	WBGene00022837	ceh-45	1128381	1128194	1128378	1128191	True	True	True	True	True	False	False	False	False	False	False	False	False	False	True	True	True	False	False	False	False	False	False	False	False	False	False	False	False
chrI	1130854	1131005	chrI	1130851	1131002	putative_enhancer	no_transcription	transcription_initiation	.	.	.	.	.	.	WBGene00022837	ceh-45	1130989	1131006	1130986	1131003	False	True	False	False	False	False	False	False	False	False	False	False	False	False	False	False	False	False	False	False	False	False	False	False	False	False	False	False	False
chrI	1132012	1132163	chrI	1132009	1132160	other_element	no_transcription	no_transcription	.	.	.	.	.	.	.	.	1132147	1132027	1132144	1132024	False	False	False	False	False	False	False	False	False	False	False	False	False	False	False	False	False	False	False	False	False	False	False	False	False	False	False	False	False
chrI	1135517	1135668	chrI	1135514	1135665	other_element	no_transcription	no_transcription	.	.	.	.	.	.	.	.	1135652	1135532	1135649	1135529	False	False	False	False	False	False	False	False	False	False	False	False	False	False	False	False	False	False	False	False	False	False	False	False	False	False	False	False	False
chrI	1139911	1140062	chrI	1139908	1140059	putative_enhancer	no_transcription	transcription_initiation	.	.	.	.	.	.	WBGene00021689	Y48G8AL.10	1140046	1139875	1140043	1139872	False	True	False	False	False	False	False	False	False	False	False	False	False	False	False	False	False	False	False	False	False	False	False	False	False	False	False	False	False
chrI	1150223	1150374	chrI	1150220	1150371	unassigned_promoter	unassigned_promoter	transcription_initiation	.	.	.	.	.	.	WBGene00021689	Y48G8AL.10	1150360	1150219	1150357	1150216	True	True	True	False	False	False	False	False	False	False	False	False	False	False	False	False	False	False	False	False	False	False	False	False	False	False	False	False	False
chrI	1153156	1153307	chrI	1153153	1153304	putative_enhancer	no_transcription	transcription_initiation	.	.	.	.	.	.	WBGene00021689	Y48G8AL.10	1153291	1153178	1153288	1153175	False	True	False	False	False	False	False	False	False	False	False	False	False	False	False	False	False	False	False	False	False	False	False	False	True	True	True	True	True
chrI	1153392	1153543	chrI	1153389	1153540	putative_enhancer	transcription_initiation	no_transcription	.	.	.	.	.	.	WBGene00021689	Y48G8AL.10	1153531	1153407	1153528	1153404	True	False	False	False	False	False	False	False	False	False	False	False	False	True	False	True	False	False	False	False	False	False	False	False	False	False	False	False	False
chrI	1156107	1156258	chrI	1156104	1156255	coding_promoter	coding_promoter	coding_promoter	WBGene00004429	rpl-17	protein_coding	WBGene00000165	aps-3	protein_coding	.	.	1156223	1156126	1156220	1156123	True	True	False	True	True	True	True	True	False	False	False	False	True	False	False	True	True	False	True	False	False	True	True	True	True	True	True	True	True
chrI	1156703	1156854	chrI	1156700	1156851	putative_enhancer	transcription_initiation	transcription_initiation	.	.	.	.	.	.	WBGene00004429	rpl-17	1156844	1156826	1156841	1156823	True	True	False	False	False	False	False	False	False	False	False	False	False	False	False	False	False	False	False	False	False	False	False	False	False	False	False	False	False
chrI	1157560	1157711	chrI	1157557	1157708	other_element	no_transcription	no_transcription	.	.	.	.	.	.	WBGene00021687	Y48G8AL.7	1157695	1157575	1157692	1157572	False	False	True	False	False	True	True	True	False	False	False	False	False	False	False	False	False	False	False	False	False	False	False	False	False	False	False	False	False
chrI	1159118	1159269	chrI	1159115	1159266	putative_enhancer	no_transcription	transcription_initiation	.	.	.	.	.	.	WBGene00021687	Y48G8AL.7	1159253	1159196	1159250	1159193	False	True	False	False	False	False	False	True	False	False	False	False	False	False	False	False	False	False	False	False	False	False	False	False	False	False	False	False	False
chrI	1161681	1161832	chrI	1161678	1161829	putative_enhancer	transcription_initiation	transcription_initiation	.	.	.	.	.	.	WBGene00021687	Y48G8AL.7	1161744	1161677	1161741	1161674	True	True	False	False	False	False	False	False	False	False	False	False	False	False	False	False	False	False	False	False	True	False	False	False	False	False	False	False	False
chrI	1166356	1166507	chrI	1166353	1166504	putative_enhancer	transcription_initiation	transcription_initiation	.	.	.	.	.	.	WBGene00001816	haf-6	1166456	1166483	1166453	1166480	True	True	False	False	False	False	False	False	False	False	False	False	False	False	False	False	False	False	False	False	False	False	False	False	False	False	False	False	False
chrI	1174913	1175064	chrI	1174910	1175061	putative_enhancer	no_transcription	transcription_initiation	.	.	.	.	.	.	WBGene00001816	haf-6	1175048	1174939	1175045	1174936	False	True	False	False	False	False	False	False	False	False	False	False	False	False	False	False	False	False	False	False	False	False	False	False	False	False	False	False	False
chrI	1175406	1175557	chrI	1175403	1175554	putative_enhancer	no_transcription	transcription_initiation	.	.	.	.	.	.	WBGene00001816	haf-6	1175541	1175462	1175538	1175459	False	True	False	False	False	False	False	False	False	False	False	False	False	False	False	False	False	False	True	False	False	False	False	False	False	False	False	False	False
chrI	1175792	1175943	chrI	1175789	1175940	coding_promoter	coding_promoter	coding_promoter	WBGene00004880	smg-2	protein_coding	WBGene00001816	haf-6	protein_coding	.	.	1175922	1175836	1175919	1175833	True	True	False	False	True	False	False	False	False	False	False	False	False	False	True	True	False	False	False	False	False	False	False	False	True	True	True	True	True
chrI	1183916	1184067	chrI	1183913	1184064	other_element	no_transcription	no_transcription	.	.	.	.	.	.	WBGene00004880	smg-2	1184051	1183931	1184048	1183928	False	False	False	False	False	False	False	False	False	False	False	False	False	False	False	False	False	False	False	False	False	False	False	False	False	False	False	False	False
chrI	1199481	1199632	chrI	1199478	1199629	other_element	no_transcription	no_transcription	.	.	.	.	.	.	WBGene00021686	Y48G8AL.5	1199616	1199496	1199613	1199493	False	False	False	False	False	False	False	False	False	False	False	False	False	False	False	False	False	False	False	False	False	False	False	False	False	False	False	False	False
chrI	1217333	1217484	chrI	1217330	1217481	coding_promoter	transcription_initiation	coding_promoter	.	.	.	WBGene00195068	Y48G8AL.16	protein_coding	.	.	1217431	1217293	1217428	1217290	True	True	False	False	False	False	False	False	False	False	False	False	False	False	False	False	False	False	False	False	False	False	False	False	True	False	True	True	True
chrI	1218551	1218702	chrI	1218548	1218699	other_element	no_transcription	no_transcription	.	.	.	.	.	.	WBGene00021685,WBGene00021690	Y48G8AL.12,herc-1	1218686	1218566	1218683	1218563	False	False	False	False	False	False	False	False	False	False	False	False	False	False	False	False	False	False	False	False	False	False	False	False	False	False	False	False	False
chrI	1226276	1226427	chrI	1226274	1226425	putative_enhancer	transcription_initiation	transcription_initiation	.	.	.	.	.	.	WBGene00021685,WBGene00021691	Y48G8AL.13,herc-1	1226387	1226274	1226385	1226272	True	True	False	False	False	False	False	False	False	False	False	False	False	False	False	False	False	False	False	False	False	False	False	False	False	False	False	False	False
chrI	1226645	1226796	chrI	1226643	1226794	putative_enhancer	transcription_initiation	transcription_initiation	.	.	.	.	.	.	WBGene00021685,WBGene00021691	Y48G8AL.13,herc-1	1226706	1226832	1226704	1226830	True	True	False	False	False	False	False	False	False	False	False	False	False	False	False	False	False	False	False	False	False	False	False	False	False	False	False	False	False
chrI	1227880	1228031	chrI	1227878	1228029	putative_enhancer	transcription_initiation	transcription_initiation	.	.	.	.	.	.	WBGene00021685,WBGene00021691	Y48G8AL.13,herc-1	1228002	1228055	1228000	1228053	True	True	False	False	False	False	False	False	False	False	False	False	False	False	False	False	False	False	False	False	False	False	False	False	False	False	False	False	False
chrI	1228613	1228764	chrI	1228611	1228762	other_element	no_transcription	no_transcription	.	.	.	.	.	.	WBGene00021685,WBGene00021691	Y48G8AL.13,herc-1	1228748	1228628	1228746	1228626	False	False	False	False	False	False	False	False	False	False	False	False	False	False	False	False	False	False	False	False	False	False	False	False	False	False	False	False	False
chrI	1229334	1229485	chrI	1229332	1229483	coding_promoter	transcription_initiation	coding_promoter	.	.	.	WBGene00021691	Y48G8AL.13	protein_coding	.	.	1229474	1229299	1229472	1229297	True	True	False	False	False	False	False	False	False	False	False	False	True	False	False	False	False	False	False	False	False	False	False	False	True	False	True	True	False
chrI	1229733	1229884	chrI	1229731	1229882	putative_enhancer	no_transcription	transcription_initiation	.	.	.	.	.	.	WBGene00021685,WBGene00021691	Y48G8AL.13,herc-1	1229868	1229697	1229866	1229695	False	True	False	False	False	False	False	False	False	False	False	False	False	False	False	False	False	False	False	False	False	False	False	False	False	False	False	False	False
chrI	1230479	1230630	chrI	1230477	1230628	coding_promoter	transcription_initiation	coding_promoter	.	.	.	WBGene00021691	Y48G8AL.13	protein_coding	.	.	1230620	1230494	1230618	1230492	True	True	False	False	False	False	False	False	False	False	False	False	False	False	False	False	False	False	False	False	True	False	False	False	True	True	True	True	True
chrI	1230849	1231000	chrI	1230847	1230998	coding_promoter	transcription_initiation	coding_promoter	.	.	.	WBGene00021691	Y48G8AL.13	protein_coding	.	.	1230977	1230944	1230975	1230942	True	True	False	False	False	False	False	False	False	False	False	False	False	False	False	False	False	False	False	False	False	False	False	False	False	True	True	False	False
chrI	1231507	1231658	chrI	1231505	1231656	other_element	no_transcription	no_transcription	.	.	.	.	.	.	WBGene00021685	herc-1	1231642	1231522	1231640	1231520	False	False	False	False	False	False	False	False	False	False	False	False	False	False	False	False	False	False	False	False	False	False	False	False	False	False	False	False	False
chrI	1241388	1241539	chrI	1241386	1241537	other_element	no_transcription	no_transcription	.	.	.	.	.	.	WBGene00021685	herc-1	1241523	1241403	1241521	1241401	False	False	False	False	False	False	False	False	False	False	False	False	False	False	False	False	False	False	False	False	False	False	False	False	False	False	False	False	False
chrI	1251575	1251726	chrI	1251573	1251724	putative_enhancer	transcription_initiation	transcription_initiation	.	.	.	.	.	.	WBGene00021685	herc-1	1251763	1251551	1251761	1251549	True	True	False	False	False	False	False	False	False	False	False	False	False	False	False	False	False	False	False	False	False	False	False	False	False	False	False	False	False
chrI	1256066	1256217	chrI	1256064	1256215	putative_enhancer	transcription_initiation	transcription_initiation	.	.	.	.	.	.	WBGene00021692	Y48G8AL.15	1256088	1256120	1256086	1256118	True	True	False	False	False	False	False	False	False	False	False	False	False	False	False	False	False	False	False	False	False	False	False	True	False	False	False	False	False
chrI	1257881	1258032	chrI	1257879	1258030	putative_enhancer	transcription_initiation	transcription_initiation	.	.	.	.	.	.	WBGene00021692	Y48G8AL.15	1257912	1257895	1257910	1257893	True	True	False	False	False	False	False	False	False	False	False	False	False	False	False	False	False	False	False	False	False	False	False	False	False	False	False	False	False
chrI	1258566	1258717	chrI	1258564	1258715	putative_enhancer	transcription_initiation	no_transcription	.	.	.	.	.	.	.	.	1258750	1258581	1258748	1258579	True	False	False	False	False	False	False	False	False	False	False	False	False	False	False	False	False	False	False	False	False	False	False	False	False	False	False	False	False
chrI	1259494	1259645	chrI	1259492	1259643	putative_enhancer	transcription_initiation	transcription_initiation	.	.	.	.	.	.	WBGene00001707	grh-1	1259613	1259516	1259611	1259514	True	True	False	False	False	False	False	False	False	False	False	False	False	False	False	False	False	False	False	False	False	False	False	False	False	False	False	False	False
chrI	1261628	1261779	chrI	1261626	1261777	putative_enhancer	transcription_initiation	transcription_initiation	.	.	.	.	.	.	WBGene00001707	grh-1	1261769	1261614	1261767	1261612	True	True	False	False	False	False	False	False	False	False	False	False	False	False	False	False	False	False	False	False	False	False	False	False	False	False	False	False	False
chrI	1264083	1264234	chrI	1264081	1264232	putative_enhancer	transcription_initiation	no_transcription	.	.	.	.	.	.	WBGene00001707	grh-1	1264205	1264098	1264203	1264096	True	False	False	False	False	False	False	False	False	False	False	False	False	False	False	False	False	False	False	False	False	False	False	False	False	False	False	False	False
chrI	1269328	1269479	chrI	1269326	1269477	other_element	no_transcription	no_transcription	.	.	.	.	.	.	WBGene00001707	grh-1	1269463	1269343	1269461	1269341	False	False	False	False	False	False	False	False	False	False	False	False	False	False	False	False	False	False	False	False	False	False	False	False	False	False	False	False	False
chrI	1271079	1271230	chrI	1271077	1271228	coding_promoter	coding_promoter	coding_promoter	WBGene00021693	Y48G8AR.2	protein_coding	WBGene00001707	grh-1	protein_coding	.	.	1271147	1271166	1271145	1271164	True	True	True	True	True	True	True	False	False	False	False	False	False	True	False	False	False	False	True	False	False	False	False	False	True	True	True	True	True
chrI	1271436	1271587	chrI	1271434	1271585	putative_enhancer	transcription_initiation	no_transcription	.	.	.	.	.	.	WBGene00021693	Y48G8AR.2	1271530	1271451	1271528	1271449	True	False	False	False	False	False	False	False	False	False	False	False	False	False	False	False	False	False	False	False	False	False	False	False	False	False	False	False	False
chrI	1272552	1272703	chrI	1272550	1272701	unassigned_promoter	transcription_initiation	unassigned_promoter	.	.	.	.	.	.	WBGene00021693	Y48G8AR.2	1272695	1272520	1272693	1272518	True	True	False	False	False	False	False	False	False	False	False	False	False	False	False	False	False	False	False	False	False	False	False	False	False	False	False	True	False
chrI	1273863	1274014	chrI	1273861	1274012	putative_enhancer	transcription_initiation	transcription_initiation	.	.	.	.	.	.	WBGene00021693	Y48G8AR.2	1274062	1273848	1274060	1273846	True	True	False	False	False	False	False	False	False	False	False	False	False	False	False	False	False	False	False	False	False	False	False	False	False	False	False	False	False
chrI	1274036	1274187	chrI	1274034	1274185	putative_enhancer	transcription_initiation	transcription_initiation	.	.	.	.	.	.	WBGene00021693	Y48G8AR.2	1274092	1274082	1274090	1274080	True	True	False	False	False	False	False	False	False	False	False	False	False	False	False	False	False	False	False	False	False	False	False	False	False	False	False	False	False
chrI	1288804	1288955	chrI	1288802	1288953	unassigned_promoter	unassigned_promoter	transcription_initiation	.	.	.	.	.	.	.	.	1288980	1288831	1288978	1288829	True	True	True	False	False	False	False	False	False	False	False	False	False	False	False	False	False	False	False	False	False	False	False	False	False	False	False	False	False
chrI	1290465	1290616	chrI	1290463	1290614	putative_enhancer	transcription_initiation	transcription_initiation	.	.	.	.	.	.	.	.	1290581	1290525	1290579	1290523	True	True	False	False	False	False	False	False	False	False	False	False	False	False	False	False	False	False	False	False	False	False	False	False	False	False	False	False	False
chrI	1291281	1291432	chrI	1291279	1291430	other_element	no_transcription	no_transcription	.	.	.	.	.	.	.	.	1291416	1291296	1291414	1291294	False	False	False	False	False	False	False	False	False	False	False	False	False	False	False	False	False	False	False	False	False	False	False	True	False	False	False	False	False
chrI	1294230	1294381	chrI	1294228	1294379	putative_enhancer	transcription_initiation	transcription_initiation	.	.	.	.	.	.	.	.	1294353	1294268	1294351	1294266	True	True	False	False	False	False	False	False	False	False	False	False	False	False	False	False	False	False	False	False	False	False	False	False	False	False	False	False	False
chrI	1295550	1295701	chrI	1295548	1295699	putative_enhancer	transcription_initiation	transcription_initiation	.	.	.	.	.	.	.	.	1295648	1295545	1295646	1295543	True	True	False	False	False	False	False	False	False	False	False	False	False	False	False	False	False	False	False	False	False	False	False	False	False	False	False	False	False
chrI	1296640	1296791	chrI	1296638	1296789	putative_enhancer	transcription_initiation	transcription_initiation	.	.	.	.	.	.	.	.	1296819	1296650	1296817	1296648	True	True	False	False	False	False	False	False	False	False	False	False	False	False	False	False	False	False	False	False	False	False	False	False	False	False	False	False	False
chrI	1298908	1299059	chrI	1298906	1299057	putative_enhancer	transcription_initiation	transcription_initiation	.	.	.	.	.	.	.	.	1299020	1298971	1299018	1298969	True	True	False	False	False	False	False	False	False	False	False	False	False	False	False	False	False	False	False	False	False	False	False	False	False	False	False	False	False
chrI	1300092	1300243	chrI	1300090	1300241	putative_enhancer	transcription_initiation	transcription_initiation	.	.	.	.	.	.	.	.	1300282	1300111	1300280	1300109	True	True	False	False	False	False	False	False	False	False	False	False	False	False	False	False	False	False	False	False	False	False	False	False	False	False	False	False	False
chrI	1301568	1301719	chrI	1301566	1301717	unassigned_promoter	transcription_initiation	unassigned_promoter	.	.	.	.	.	.	.	.	1301724	1301583	1301722	1301581	True	True	False	False	False	False	False	False	False	False	False	False	False	False	False	False	False	False	False	False	False	False	False	False	False	False	True	False	False
chrI	1303014	1303165	chrI	1303012	1303163	putative_enhancer	transcription_initiation	transcription_initiation	.	.	.	.	.	.	.	.	1303095	1303004	1303093	1303002	True	True	False	False	False	False	False	False	False	False	False	False	False	False	False	False	False	False	False	False	False	False	False	False	False	False	False	False	False
chrI	1304082	1304233	chrI	1304080	1304231	other_element	no_transcription	no_transcription	.	.	.	.	.	.	.	.	1304217	1304097	1304215	1304095	False	False	False	False	False	False	False	False	False	False	False	False	False	False	False	False	False	False	False	False	False	False	False	False	False	False	False	False	False
chrI	1304333	1304484	chrI	1304331	1304482	putative_enhancer	no_transcription	transcription_initiation	.	.	.	.	.	.	.	.	1304468	1304348	1304466	1304346	False	True	False	False	False	False	False	False	False	False	False	False	False	False	False	False	False	False	False	False	False	False	False	False	False	False	False	False	False
chrI	1305334	1305485	chrI	1305332	1305483	coding_promoter	coding_promoter	no_transcription	WBGene00003400	dapk-1	protein_coding	.	.	.	.	.	1305444	1305349	1305442	1305347	True	False	True	True	True	True	True	True	False	False	True	False	False	False	False	False	False	False	False	False	False	False	False	False	False	False	False	False	False
chrI	1305727	1305878	chrI	1305725	1305876	putative_enhancer	transcription_initiation	transcription_initiation	.	.	.	.	.	.	WBGene00003400	dapk-1	1305866	1305749	1305864	1305747	True	True	False	False	False	False	False	False	False	False	False	False	False	False	False	False	False	False	False	False	False	False	False	False	False	False	False	False	False
chrI	1311072	1311223	chrI	1311070	1311221	putative_enhancer	transcription_initiation	no_transcription	.	.	.	.	.	.	WBGene00003400	dapk-1	1311223	1311087	1311221	1311085	True	False	False	False	False	False	False	False	False	False	False	False	False	False	False	False	False	False	False	False	False	False	False	False	False	False	False	False	False
chrI	1312905	1313056	chrI	1312903	1313054	other_element	no_transcription	no_transcription	.	.	.	.	.	.	WBGene00003400	dapk-1	1313040	1312920	1313038	1312918	False	False	False	False	False	False	False	False	False	False	False	False	False	False	False	False	False	False	False	False	False	False	False	False	False	False	False	False	False
chrI	1313681	1313832	chrI	1313679	1313830	putative_enhancer	transcription_initiation	transcription_initiation	.	.	.	.	.	.	WBGene00003400	dapk-1	1313817	1313739	1313815	1313737	True	True	False	False	False	False	False	False	False	False	False	False	False	False	False	False	False	False	False	False	False	False	False	False	False	False	False	False	False
chrI	1315549	1315700	chrI	1315547	1315698	putative_enhancer	transcription_initiation	transcription_initiation	.	.	.	.	.	.	WBGene00003400	dapk-1	1315709	1315529	1315707	1315527	True	True	False	False	False	False	False	False	False	False	False	False	False	False	False	False	False	False	False	False	False	False	False	False	False	False	False	False	False
chrI	1316145	1316296	chrI	1316143	1316294	putative_enhancer	no_transcription	transcription_initiation	.	.	.	.	.	.	WBGene00003400	dapk-1	1316280	1316120	1316278	1316118	False	True	False	False	False	False	False	False	False	False	False	False	False	False	False	False	False	False	False	False	False	False	False	False	False	False	False	False	False
chrI	1317086	1317237	chrI	1317084	1317235	putative_enhancer	transcription_initiation	transcription_initiation	.	.	.	.	.	.	WBGene00003400	dapk-1	1317159	1317245	1317157	1317243	True	True	False	False	False	False	False	False	False	False	False	False	False	False	False	False	False	False	False	False	False	False	False	False	False	False	False	False	False
chrI	1322043	1322194	chrI	1322041	1322192	putative_enhancer	no_transcription	transcription_initiation	.	.	.	.	.	.	WBGene00003400	dapk-1	1322178	1322167	1322176	1322165	False	True	False	False	False	False	False	False	False	False	False	False	False	False	False	False	False	False	False	False	False	False	False	False	False	False	False	False	False
chrI	1327936	1328087	chrI	1327934	1328085	putative_enhancer	transcription_initiation	no_transcription	.	.	.	.	.	.	WBGene00003400	dapk-1	1327962	1327951	1327960	1327949	True	False	False	False	False	False	False	False	False	False	False	False	False	False	False	False	False	False	False	False	False	False	False	False	False	False	False	False	False
chrI	1331184	1331335	chrI	1331182	1331333	putative_enhancer	transcription_initiation	no_transcription	.	.	.	.	.	.	.	.	1331242	1331199	1331240	1331197	True	False	False	False	False	False	False	False	False	False	False	False	False	False	False	False	False	False	False	False	False	False	False	False	False	False	False	False	False
chrI	1335234	1335385	chrI	1335232	1335383	coding_promoter	coding_promoter	no_transcription	WBGene00019674	K12C11.3	protein_coding	.	.	.	.	.	1335346	1335249	1335344	1335247	True	False	True	True	True	True	True	True	True	True	True	True	True	True	True	True	True	False	True	True	True	True	True	True	False	False	False	False	False
chrI	1336773	1336924	chrI	1336771	1336922	coding_promoter	coding_promoter	no_transcription	WBGene00045052	K12C11.6	protein_coding	.	.	.	.	.	1336867	1336788	1336865	1336786	True	False	True	False	True	True	True	False	True	True	True	True	True	False	False	False	False	False	False	False	False	False	False	False	False	False	False	False	False
chrI	1339709	1339860	chrI	1339707	1339858	putative_enhancer	transcription_initiation	no_transcription	.	.	.	.	.	.	WBGene00045053	K12C11.7	1339833	1339724	1339831	1339722	True	False	False	False	False	False	False	False	False	False	False	False	False	False	False	False	False	False	False	False	False	False	False	False	False	False	False	False	False
chrI	1340096	1340247	chrI	1340094	1340245	coding_promoter	coding_promoter	transcription_initiation	WBGene00004888	smo-1	protein_coding	.	.	.	.	.	1340216	1340123	1340214	1340121	True	True	True	True	True	True	True	True	False	False	False	False	False	False	False	False	False	False	False	False	False	False	False	False	False	False	False	False	False
chrI	1340525	1340676	chrI	1340523	1340674	coding_promoter	coding_promoter	transcription_initiation	WBGene00004888	smo-1	protein_coding	.	.	.	.	.	1340684	1340609	1340682	1340607	True	True	True	True	True	True	True	True	True	True	True	True	True	False	False	False	False	False	False	True	True	False	True	True	False	False	False	False	False
chrI	1340986	1341137	chrI	1340984	1341135	putative_enhancer	transcription_initiation	transcription_initiation	.	.	.	.	.	.	WBGene00004888	smo-1	1341146	1341004	1341144	1341002	True	True	False	False	False	False	False	False	False	False	False	False	False	False	False	False	False	False	False	False	False	False	False	False	False	False	False	False	False
chrI	1341378	1341529	chrI	1341376	1341527	putative_enhancer	transcription_initiation	transcription_initiation	.	.	.	.	.	.	WBGene00019673	K12C11.1	1341539	1341490	1341537	1341488	True	True	False	False	False	False	False	False	False	False	False	False	False	False	False	False	False	False	False	False	False	False	False	False	False	False	False	False	False
chrI	1342174	1342325	chrI	1342172	1342323	putative_enhancer	transcription_initiation	transcription_initiation	.	.	.	.	.	.	WBGene00019673	K12C11.1	1342174	1342304	1342172	1342302	True	True	False	False	False	False	False	False	False	False	False	False	False	False	False	False	False	False	False	False	False	False	False	False	False	False	False	False	False
chrI	1346214	1346365	chrI	1346212	1346363	putative_enhancer	transcription_initiation	transcription_initiation	.	.	.	.	.	.	.	.	1346304	1346229	1346302	1346227	True	True	False	False	False	False	False	False	False	False	False	False	False	False	False	False	False	False	False	False	False	False	False	False	False	False	False	False	False
chrI	1356523	1356674	chrI	1356521	1356672	other_element	no_transcription	no_transcription	.	.	.	.	.	.	WBGene00022363	Y92H12BL.1	1356658	1356538	1356656	1356536	False	False	False	False	False	False	False	False	False	False	False	False	False	False	False	False	False	False	False	False	False	False	False	False	False	False	False	False	False
chrI	1359580	1359731	chrI	1359578	1359729	putative_enhancer	no_transcription	transcription_initiation	.	.	.	.	.	.	WBGene00022363	Y92H12BL.1	1359715	1359599	1359713	1359597	False	True	False	False	False	False	False	False	False	False	False	False	False	False	False	False	False	False	False	False	False	False	False	False	False	False	False	False	False
chrI	1360192	1360343	chrI	1360190	1360341	putative_enhancer	transcription_initiation	transcription_initiation	.	.	.	.	.	.	.	.	1360335	1360202	1360333	1360200	True	True	False	False	False	False	False	False	False	False	False	False	False	False	False	False	False	False	False	False	False	False	False	False	False	False	False	False	False
chrI	1361301	1361452	chrI	1361299	1361450	coding_promoter	coding_promoter	transcription_initiation	WBGene00022366	Y92H12BL.5	protein_coding	.	.	.	.	.	1361451	1361392	1361449	1361390	True	True	False	False	True	False	False	False	True	False	False	True	False	False	False	False	False	False	False	False	False	False	False	True	False	False	False	False	False
chrI	1363708	1363859	chrI	1363706	1363857	putative_enhancer	no_transcription	transcription_initiation	.	.	.	.	.	.	WBGene00022366	Y92H12BL.5	1363843	1363748	1363841	1363746	False	True	False	False	False	False	False	False	False	False	False	False	False	False	False	False	False	False	False	False	False	False	False	False	False	False	False	False	False
chrI	1365425	1365576	chrI	1365423	1365574	putative_enhancer	transcription_initiation	transcription_initiation	.	.	.	.	.	.	WBGene00022366	Y92H12BL.5	1365577	1365446	1365575	1365444	True	True	False	False	False	False	False	False	False	False	False	False	False	False	False	False	False	False	False	False	False	False	False	False	False	False	False	False	False
chrI	1368822	1368973	chrI	1368820	1368971	putative_enhancer	transcription_initiation	transcription_initiation	.	.	.	.	.	.	WBGene00022366	Y92H12BL.5	1368945	1368823	1368943	1368821	True	True	False	False	False	False	False	False	False	False	False	False	False	False	False	False	False	False	False	False	False	False	False	False	False	False	False	False	False
chrI	1371187	1371338	chrI	1371185	1371336	putative_enhancer	no_transcription	transcription_initiation	.	.	.	.	.	.	WBGene00022366	Y92H12BL.5	1371322	1371358	1371320	1371356	False	True	False	False	False	False	False	False	False	False	False	False	False	False	False	False	False	False	False	False	False	False	False	False	False	False	False	False	False
chrI	1392560	1392711	chrI	1392558	1392709	putative_enhancer	transcription_initiation	no_transcription	.	.	.	.	.	.	WBGene00022367	Y92H12BM.1	1392639	1392575	1392637	1392573	True	False	False	False	False	False	False	False	False	False	False	False	False	False	True	False	False	False	False	False	False	False	False	False	False	False	False	False	False
chrI	1392915	1393066	chrI	1392913	1393064	coding_promoter	transcription_initiation	coding_promoter	.	.	.	WBGene00022367	Y92H12BM.1	protein_coding	.	.	1393029	1392991	1393027	1392989	True	True	False	False	False	False	False	False	False	False	False	False	False	False	False	False	False	False	False	False	False	False	False	False	True	True	True	True	True
chrI	1394261	1394412	chrI	1394259	1394410	coding_promoter	coding_promoter	coding_promoter	WBGene00022372	Y92H12BR.7	protein_coding	WBGene00022367	Y92H12BM.1	protein_coding	.	.	1394451	1394417	1394449	1394415	True	True	True	True	True	True	True	True	False	False	False	False	False	False	False	False	False	False	False	False	True	False	False	False	False	False	True	False	True
chrI	1410014	1410165	chrI	1410012	1410163	putative_enhancer	no_transcription	transcription_initiation	.	.	.	.	.	.	WBGene00022371	set-29	1410149	1410066	1410147	1410064	False	True	False	False	False	False	False	False	False	False	False	False	False	False	False	False	False	False	False	False	False	False	False	False	False	False	False	False	False
chrI	1415520	1415671	chrI	1415518	1415669	other_element	no_transcription	no_transcription	.	.	.	.	.	.	WBGene00022368	Y92H12BR.2	1415655	1415535	1415653	1415533	False	False	False	False	False	False	False	False	False	False	False	False	False	False	False	False	False	False	False	False	False	False	False	False	False	False	False	False	False
chrI	1415944	1416095	chrI	1415942	1416093	coding_promoter	coding_promoter	coding_promoter	WBGene00022369	Y92H12BR.3	protein_coding	WBGene00022368	Y92H12BR.2	protein_coding	.	.	1416079	1415932	1416077	1415930	False	True	False	True	True	True	False	True	False	False	False	False	False	True	False	True	True	False	True	False	False	False	True	True	True	True	True	True	True
chrI	1416102	1416253	chrI	1416100	1416251	coding_promoter	coding_promoter	coding_promoter	WBGene00022369	Y92H12BR.3	protein_coding	WBGene00022368	Y92H12BR.2	protein_coding	.	.	1416225	1416179	1416223	1416177	True	True	True	True	True	True	True	True	False	False	False	False	False	True	True	True	True	True	True	False	False	True	False	True	False	False	False	False	False
chrI	1425242	1425393	chrI	1425240	1425391	other_element	no_transcription	no_transcription	.	.	.	.	.	.	.	.	1425377	1425257	1425375	1425255	False	False	False	False	False	False	False	False	False	False	False	False	False	False	False	False	False	False	False	False	False	False	False	False	False	False	False	False	False
chrI	1426162	1426313	chrI	1426160	1426311	other_element	no_transcription	no_transcription	.	.	.	.	.	.	.	.	1426297	1426177	1426295	1426175	False	False	False	False	False	False	False	False	False	False	False	False	False	False	False	False	False	False	False	False	False	False	False	True	True	True	True	False	False
chrI	1435235	1435386	chrI	1435233	1435384	coding_promoter	coding_promoter	transcription_initiation	WBGene00022373	mrpl-15	protein_coding	.	.	.	.	.	1435377	1435251	1435375	1435249	True	True	False	False	True	False	True	False	True	False	False	False	False	True	False	False	False	True	False	True	False	True	True	False	False	False	False	False	False
chrI	1435592	1435743	chrI	1435590	1435741	pseudogene_promoter	transcription_initiation	pseudogene_promoter	.	.	.	WBGene00022370	Y92H12BR.4	pseudogene	.	.	1435768	1435626	1435766	1435624	True	True	False	False	False	False	False	False	False	False	False	False	False	False	False	False	False	False	False	False	False	False	False	False	True	True	True	True	False
chrI	1444209	1444360	chrI	1444207	1444358	coding_promoter	coding_promoter	coding_promoter	WBGene00004969	spe-15	protein_coding	WBGene00018159	F37F2.2	protein_coding	.	.	1444266	1444167	1444264	1444165	True	True	False	False	True	False	False	False	False	False	False	False	False	False	False	False	False	False	True	False	False	False	False	False	False	True	True	True	True
chrI	1447004	1447155	chrI	1447002	1447153	non-coding_RNA	non-coding_RNA	transcription_initiation	WBGene00023055	F47G6.t1	tRNA	.	.	.	.	.	1447139	1447032	1447137	1447030	False	True	False	False	False	False	False	False	False	False	False	False	False	False	False	False	False	False	False	False	False	False	False	False	False	False	False	False	False
chrI	1451574	1451725	chrI	1451572	1451723	putative_enhancer	transcription_initiation	no_transcription	.	.	.	.	.	.	WBGene00001773,WBGene00004969	gst-25,spe-15	1451738	1451589	1451736	1451587	True	False	False	False	False	False	False	False	False	False	False	False	False	False	False	False	False	False	False	False	False	False	False	False	False	False	False	False	False
chrI	1453076	1453227	chrI	1453074	1453225	coding_promoter	no_transcription	coding_promoter	.	.	.	WBGene00001773	gst-25	protein_coding	.	.	1453211	1453091	1453209	1453089	False	False	False	False	False	False	False	False	False	False	False	False	False	False	False	False	False	False	False	False	False	False	False	False	False	False	False	False	False
chrI	1455334	1455485	chrI	1455332	1455483	putative_enhancer	transcription_initiation	no_transcription	.	.	.	.	.	.	WBGene00004969	spe-15	1455448	1455349	1455446	1455347	True	False	False	False	False	False	False	False	False	False	False	False	False	False	False	False	False	False	False	False	False	False	False	False	False	False	False	False	False
chrI	1459069	1459220	chrI	1459067	1459218	other_element	no_transcription	no_transcription	.	.	.	.	.	.	WBGene00004969	spe-15	1459204	1459084	1459202	1459082	False	False	False	False	False	False	False	False	False	False	False	False	False	False	False	False	False	False	False	False	False	False	False	False	False	False	False	False	False
chrI	1471123	1471274	chrI	1471121	1471272	coding_promoter	coding_promoter	no_transcription	WBGene00018579	acs-16	protein_coding	.	.	.	.	.	1471277	1471138	1471275	1471136	True	False	False	True	True	True	False	False	False	False	False	False	True	True	True	True	True	True	False	True	False	True	False	True	False	False	False	False	False
chrI	1476656	1476807	chrI	1476654	1476805	putative_enhancer	no_transcription	transcription_initiation	.	.	.	.	.	.	WBGene00018579	acs-16	1476791	1476681	1476789	1476679	False	True	False	False	False	False	False	False	False	False	False	False	False	False	False	False	False	False	False	False	False	False	False	False	False	False	False	False	False
chrI	1479352	1479503	chrI	1479350	1479501	other_element	no_transcription	no_transcription	.	.	.	.	.	.	WBGene00018579	acs-16	1479487	1479367	1479485	1479365	False	False	False	False	False	False	False	False	False	False	False	False	False	False	False	False	False	False	False	False	False	False	False	False	False	False	False	False	False
chrI	1481610	1481761	chrI	1481608	1481759	coding_promoter	coding_promoter	transcription_initiation	WBGene00001115	dyb-1	protein_coding	.	.	.	.	.	1481682	1481587	1481680	1481585	True	True	True	True	True	False	False	False	False	False	False	False	False	False	False	False	False	False	False	False	False	False	False	False	False	False	False	False	False
chrI	1482827	1482978	chrI	1482825	1482976	putative_enhancer	transcription_initiation	no_transcription	.	.	.	.	.	.	WBGene00001115	dyb-1	1482990	1482842	1482988	1482840	True	False	False	False	False	False	False	False	False	False	False	False	False	False	False	False	False	False	False	False	False	False	False	False	False	False	False	False	False
chrI	1493530	1493681	chrI	1493528	1493679	other_element	no_transcription	no_transcription	.	.	.	.	.	.	WBGene00022361	Y92H12A.5	1493665	1493545	1493663	1493543	False	False	False	False	False	False	False	False	False	False	False	False	False	False	False	False	False	False	False	False	False	False	False	False	False	False	False	False	False
chrI	1508675	1508826	chrI	1508673	1508824	other_element	no_transcription	no_transcription	.	.	.	.	.	.	WBGene00022361	Y92H12A.5	1508810	1508690	1508808	1508688	False	False	True	False	False	False	False	False	False	False	False	False	False	False	False	False	False	False	False	False	False	False	False	False	False	False	False	False	False
chrI	1514521	1514672	chrI	1514519	1514670	coding_promoter	coding_promoter	coding_promoter	WBGene00022360	Y92H12A.4	protein_coding	WBGene00022361	Y92H12A.5	protein_coding	.	.	1514656	1514562	1514654	1514560	False	True	True	True	True	True	True	True	True	True	True	True	True	False	True	False	False	False	True	True	False	False	True	False	True	True	True	True	True
chrI	1535737	1535888	chrI	1535735	1535886	other_element	no_transcription	no_transcription	.	.	.	.	.	.	WBGene00022360	Y92H12A.4	1535872	1535752	1535870	1535750	False	False	False	False	False	False	False	False	False	False	False	False	False	False	False	False	False	False	False	False	False	False	False	False	False	False	False	False	False
chrI	1537259	1537410	chrI	1537257	1537408	putative_enhancer	transcription_initiation	no_transcription	.	.	.	.	.	.	WBGene00022360	Y92H12A.4	1537403	1537274	1537401	1537272	True	False	False	False	False	False	False	False	False	False	False	False	True	False	False	False	False	False	False	False	True	False	False	False	False	False	False	False	False
chrI	1537928	1538079	chrI	1537926	1538077	other_element	no_transcription	no_transcription	.	.	.	.	.	.	WBGene00022360	Y92H12A.4	1538063	1537943	1538061	1537941	False	False	False	False	False	False	False	False	False	False	False	False	False	False	False	False	False	False	False	False	False	False	False	False	False	False	False	False	False
chrI	1539006	1539157	chrI	1539004	1539155	putative_enhancer	transcription_initiation	no_transcription	.	.	.	.	.	.	WBGene00022360	Y92H12A.4	1539162	1539021	1539160	1539019	True	False	False	False	False	False	False	False	False	False	False	False	False	False	False	False	False	False	False	False	False	False	False	False	False	False	False	False	False
chrI	1540594	1540745	chrI	1540592	1540743	putative_enhancer	transcription_initiation	transcription_initiation	.	.	.	.	.	.	WBGene00022360	Y92H12A.4	1540779	1540546	1540777	1540544	True	True	False	False	False	False	False	False	False	True	False	False	False	False	False	False	False	False	False	False	True	False	False	False	False	False	False	False	False
chrI	1540896	1541047	chrI	1540894	1541045	putative_enhancer	transcription_initiation	transcription_initiation	.	.	.	.	.	.	.	.	1541031	1540983	1541029	1540981	True	True	False	False	False	False	False	False	False	False	False	False	False	False	False	False	False	False	False	False	False	False	False	False	False	False	False	False	False
chrI	1541460	1541611	chrI	1541458	1541609	putative_enhancer	no_transcription	transcription_initiation	.	.	.	.	.	.	.	.	1541595	1541467	1541593	1541465	False	True	False	False	False	False	False	False	False	False	False	False	False	False	False	False	False	False	False	False	False	False	False	False	False	False	False	False	False
chrI	1548249	1548400	chrI	1548247	1548398	putative_enhancer	transcription_initiation	transcription_initiation	.	.	.	.	.	.	WBGene00022358	Y92H12A.2	1548370	1548263	1548368	1548261	True	True	False	False	False	False	False	False	False	False	False	False	False	False	False	False	False	False	False	False	False	False	False	False	False	False	False	False	False
chrI	1557436	1557587	chrI	1557434	1557585	putative_enhancer	transcription_initiation	no_transcription	.	.	.	.	.	.	.	.	1557443	1557451	1557441	1557449	True	False	False	False	False	False	False	False	False	False	False	False	False	False	False	False	False	False	False	False	False	False	False	False	False	False	False	False	False
chrI	1558571	1558722	chrI	1558569	1558720	putative_enhancer	no_transcription	transcription_initiation	.	.	.	.	.	.	.	.	1558706	1558642	1558704	1558640	False	True	False	False	False	False	False	False	False	False	False	False	False	False	False	False	False	False	False	False	False	False	False	False	False	False	False	False	False
chrI	1559174	1559325	chrI	1559172	1559323	coding_promoter	coding_promoter	transcription_initiation	WBGene00005077	src-1	protein_coding	.	.	.	.	.	1559345	1559216	1559343	1559214	True	True	True	False	True	False	False	False	True	False	False	False	False	False	False	False	False	False	False	True	False	False	False	False	False	False	False	False	False
chrI	1562641	1562792	chrI	1562639	1562790	coding_promoter	coding_promoter	transcription_initiation	WBGene00005077	src-1	protein_coding	.	.	.	.	.	1562692	1562620	1562690	1562618	True	True	False	False	True	False	False	False	False	True	False	False	True	False	False	False	False	False	False	False	True	False	False	False	False	False	False	False	False
chrI	1564114	1564265	chrI	1564112	1564263	putative_enhancer	transcription_initiation	transcription_initiation	.	.	.	.	.	.	WBGene00005077	src-1	1564300	1564116	1564298	1564114	True	True	False	False	False	False	False	False	False	False	False	False	False	False	False	False	False	False	False	False	False	False	False	False	False	False	False	False	False
chrI	1565223	1565374	chrI	1565221	1565372	putative_enhancer	no_transcription	transcription_initiation	.	.	.	.	.	.	WBGene00005077	src-1	1565358	1565174	1565356	1565172	False	True	False	False	False	False	False	False	False	False	False	False	False	False	False	False	False	False	False	False	False	False	False	False	False	False	False	False	False
chrI	1574235	1574386	chrI	1574233	1574384	other_element	no_transcription	no_transcription	.	.	.	.	.	.	WBGene00005077	src-1	1574370	1574250	1574368	1574248	False	False	False	False	False	False	False	False	False	False	False	False	False	False	False	False	False	False	False	False	False	False	False	False	False	False	False	False	False
chrI	1575622	1575773	chrI	1575620	1575771	non-coding_RNA	non-coding_RNA	transcription_initiation	WBGene00023198	Y92H12A.t1	tRNA	.	.	.	.	.	1575757	1575657	1575755	1575655	False	True	False	False	False	False	False	False	False	False	False	False	False	False	False	False	False	False	False	False	False	False	False	False	False	False	False	False	False
chrI	1581221	1581372	chrI	1581219	1581370	putative_enhancer	transcription_initiation	transcription_initiation	.	.	.	.	.	.	.	.	1581336	1581258	1581334	1581256	True	True	False	False	False	False	False	False	False	False	False	False	False	False	False	False	False	False	False	False	False	False	False	False	False	False	False	False	False
chrI	1582021	1582172	chrI	1582019	1582170	putative_enhancer	transcription_initiation	transcription_initiation	.	.	.	.	.	.	WBGene00022270	Y73E7A.3	1582216	1582068	1582214	1582066	True	True	False	False	True	False	False	False	False	False	False	False	False	False	False	False	False	False	False	False	True	False	False	False	False	False	False	False	False
chrI	1583400	1583551	chrI	1583398	1583549	putative_enhancer	no_transcription	transcription_initiation	.	.	.	.	.	.	WBGene00022270	Y73E7A.3	1583535	1583442	1583533	1583440	False	True	False	False	False	False	False	False	False	False	False	False	False	False	False	False	False	False	False	False	False	False	False	False	False	False	False	False	False
chrI	1585153	1585304	chrI	1585151	1585302	putative_enhancer	transcription_initiation	transcription_initiation	.	.	.	.	.	.	WBGene00022270	Y73E7A.3	1585279	1585127	1585277	1585125	True	True	False	False	True	True	True	False	False	True	True	False	True	False	False	False	False	False	False	True	True	False	False	False	False	False	False	False	False
chrI	1588221	1588372	chrI	1588219	1588370	coding_promoter	coding_promoter	no_transcription	WBGene00022270	Y73E7A.3	protein_coding	.	.	.	.	.	1588362	1588236	1588360	1588234	True	False	False	False	False	False	False	True	True	True	False	True	False	False	False	False	False	False	False	False	True	False	True	False	False	False	False	False	False
chrI	1596598	1596749	chrI	1596596	1596747	other_element	no_transcription	no_transcription	.	.	.	.	.	.	WBGene00022271	cpx-1	1596733	1596613	1596731	1596611	False	False	False	False	False	False	False	False	False	False	False	False	False	False	False	False	False	False	False	False	False	False	False	False	False	False	False	False	False
chrI	1598560	1598711	chrI	1598558	1598709	coding_promoter	transcription_initiation	coding_promoter	.	.	.	WBGene00022271	cpx-1	protein_coding	.	.	1598725	1598528	1598723	1598526	True	True	False	False	False	False	False	False	False	False	False	False	False	False	False	False	True	False	False	False	False	False	False	False	False	True	True	True	True
chrI	1610116	1610267	chrI	1610114	1610265	coding_promoter	coding_promoter	coding_promoter	WBGene00044440	adpr-1	protein_coding	WBGene00022273	Y73E7A.6	protein_coding	.	.	1610242	1610123	1610240	1610121	True	True	True	True	True	True	True	True	True	True	True	True	True	False	True	True	True	True	True	True	True	True	True	True	True	True	True	True	True
chrI	1626490	1626641	chrI	1626488	1626639	other_element	no_transcription	no_transcription	.	.	.	.	.	.	WBGene00000269	bre-4	1626625	1626505	1626623	1626503	False	False	False	False	False	False	False	False	False	False	False	False	False	False	False	False	False	False	False	False	False	False	False	False	False	False	True	False	False
chrI	1628637	1628788	chrI	1628635	1628786	coding_promoter	coding_promoter	coding_promoter	WBGene00022268	Y73E7A.1	protein_coding	WBGene00000269	bre-4	protein_coding	.	.	1628731	1628636	1628729	1628634	True	True	False	False	False	True	False	False	False	False	False	False	False	True	False	True	True	False	False	False	False	False	False	True	False	True	True	False	True
chrI	1634527	1634678	chrI	1634525	1634676	coding_promoter	coding_promoter	transcription_initiation	WBGene00022274	Y73E7A.8	protein_coding	.	.	.	.	.	1634694	1634509	1634692	1634507	True	True	True	False	False	True	True	False	False	False	False	False	False	True	False	False	True	False	False	False	False	False	False	False	False	False	False	False	False
chrI	1636521	1636672	chrI	1636519	1636670	putative_enhancer	no_transcription	transcription_initiation	.	.	.	.	.	.	WBGene00022274	Y73E7A.8	1636656	1636556	1636654	1636554	False	True	False	False	False	False	False	False	False	False	False	False	False	False	False	False	False	False	False	False	False	False	False	False	False	False	False	False	False
chrI	1641390	1641541	chrI	1641388	1641539	putative_enhancer	transcription_initiation	transcription_initiation	.	.	.	.	.	.	WBGene00022274	Y73E7A.8	1641490	1641561	1641488	1641559	True	True	False	False	False	False	False	False	False	False	False	False	False	False	False	False	False	False	False	False	False	False	False	False	False	False	False	False	False
chrI	1651382	1651533	chrI	1651380	1651531	coding_promoter	transcription_initiation	coding_promoter	.	.	.	WBGene00003111	mab-20	protein_coding	.	.	1651479	1651379	1651477	1651377	True	True	False	False	False	False	False	False	False	False	False	False	False	True	True	False	False	False	False	False	False	False	False	False	True	True	True	True	False
chrI	1656779	1656930	chrI	1656777	1656928	coding_promoter	transcription_initiation	coding_promoter	.	.	.	WBGene00004168	pqn-88	protein_coding	.	.	1656902	1656745	1656900	1656743	True	True	False	False	False	False	False	False	False	False	False	False	False	False	False	False	False	False	False	False	False	False	False	False	False	True	True	False	True
chrI	1667364	1667515	chrI	1667362	1667513	coding_promoter	coding_promoter	transcription_initiation	WBGene00022155	Y71G12B.17	protein_coding	.	.	.	.	.	1667499	1667366	1667497	1667364	False	True	True	True	False	True	True	False	False	False	False	False	False	False	False	False	False	True	False	False	False	True	False	True	False	False	False	False	False
chrI	1669118	1669269	chrI	1669116	1669267	putative_enhancer	transcription_initiation	no_transcription	.	.	.	.	.	.	WBGene00022155	Y71G12B.17	1669200	1669133	1669198	1669131	True	False	False	False	False	False	False	False	False	False	False	False	False	False	False	False	False	False	False	False	False	False	False	False	False	False	False	False	False
chrI	1672398	1672549	chrI	1672396	1672547	putative_enhancer	transcription_initiation	no_transcription	.	.	.	.	.	.	WBGene00022158	Y71G12B.23	1672517	1672413	1672515	1672411	True	False	False	False	False	False	False	False	False	False	False	False	False	False	False	False	False	False	False	False	False	False	False	False	False	True	False	False	False
chrI	1676588	1676739	chrI	1676586	1676737	coding_promoter	no_transcription	coding_promoter	.	.	.	WBGene00185098	Y71G12B.35	protein_coding	.	.	1676723	1676580	1676721	1676578	False	True	True	False	False	False	False	False	False	False	False	False	False	True	True	True	True	False	False	False	False	False	False	False	True	True	True	True	False
chrI	1677539	1677690	chrI	1677537	1677688	putative_enhancer	no_transcription	transcription_initiation	.	.	.	.	.	.	.	.	1677674	1677535	1677672	1677533	False	True	False	False	False	False	False	False	False	False	False	False	False	False	False	False	False	False	False	False	False	False	False	False	False	False	False	False	False
chrI	1678984	1679135	chrI	1678982	1679133	coding_promoter	coding_promoter	transcription_initiation	WBGene00022154	drag-1	protein_coding	.	.	.	.	.	1679118	1679085	1679116	1679083	True	True	False	False	False	False	False	False	False	False	False	False	False	False	False	False	False	False	False	False	False	False	False	False	False	False	False	False	False
chrI	1680384	1680535	chrI	1680382	1680533	other_element	no_transcription	no_transcription	.	.	.	.	.	.	WBGene00022154	drag-1	1680519	1680399	1680517	1680397	False	False	False	False	False	False	False	False	False	False	False	False	False	False	False	False	False	False	False	False	False	False	False	False	False	False	False	False	False
chrI	1686251	1686402	chrI	1686249	1686400	coding_promoter	coding_promoter	transcription_initiation	WBGene00006702	ubc-3	protein_coding	.	.	.	.	.	1686373	1686275	1686371	1686273	True	True	False	False	False	False	False	False	False	False	True	False	False	False	False	False	False	False	False	False	False	True	False	False	False	False	False	False	False
chrI	1687744	1687895	chrI	1687742	1687893	coding_promoter	coding_promoter	transcription_initiation	WBGene00006702	ubc-3	protein_coding	.	.	.	.	.	1687939	1687806	1687937	1687804	True	True	True	True	True	True	True	True	True	False	True	False	True	False	False	False	False	False	True	False	False	False	False	False	False	False	False	False	False
chrI	1688945	1689096	chrI	1688943	1689094	coding_promoter	coding_promoter	transcription_initiation	WBGene00006702	ubc-3	protein_coding	.	.	.	.	.	1689103	1688952	1689101	1688950	True	True	True	True	True	True	True	True	True	False	True	True	True	False	False	False	False	False	False	False	False	False	False	False	False	False	False	False	False
chrI	1691112	1691263	chrI	1691110	1691261	putative_enhancer	transcription_initiation	transcription_initiation	.	.	.	.	.	.	WBGene00006702,WBGene00044348	Y71G12B.31,ubc-3	1691298	1691126	1691296	1691124	True	True	False	False	False	False	False	False	False	False	False	False	False	False	False	False	False	False	False	False	False	False	False	False	False	False	False	False	False
chrI	1691395	1691546	chrI	1691393	1691544	putative_enhancer	transcription_initiation	transcription_initiation	.	.	.	.	.	.	WBGene00006702,WBGene00044348	Y71G12B.31,ubc-3	1691511	1691467	1691509	1691465	True	True	False	False	False	False	False	False	False	False	False	False	False	False	False	False	False	False	False	False	False	False	False	False	False	False	False	False	False
chrI	1693025	1693176	chrI	1693023	1693174	non-coding_RNA	non-coding_RNA	transcription_initiation	WBGene00220197	Y71G12B.41	snoRNA	.	.	.	.	.	1693160	1693103	1693158	1693101	True	True	False	False	False	False	False	False	False	False	False	False	False	False	False	False	False	False	False	False	False	False	False	False	False	False	False	False	False
chrI	1693242	1693393	chrI	1693240	1693391	putative_enhancer	transcription_initiation	transcription_initiation	.	.	.	.	.	.	WBGene00006702,WBGene00044348,WBGene00220197	Y71G12B.31,Y71G12B.41,ubc-3	1693393	1693250	1693391	1693248	True	True	False	False	False	False	False	False	False	False	False	False	False	False	False	False	False	False	False	False	False	False	False	False	False	False	False	False	False
chrI	1695158	1695309	chrI	1695156	1695307	coding_promoter	coding_promoter	transcription_initiation	WBGene00006702	ubc-3	protein_coding	.	.	.	.	.	1695346	1695177	1695344	1695175	True	True	False	False	False	False	True	False	False	False	False	False	False	False	False	False	False	False	False	False	False	False	False	False	False	False	False	False	False
chrI	1697076	1697227	chrI	1697074	1697225	putative_enhancer	transcription_initiation	transcription_initiation	.	.	.	.	.	.	WBGene00006702	ubc-3	1697156	1697148	1697154	1697146	True	True	False	False	False	False	False	False	False	False	False	False	False	False	False	False	False	False	False	False	False	False	False	False	False	False	False	False	False
chrI	1697993	1698144	chrI	1697991	1698142	coding_promoter	coding_promoter	transcription_initiation	WBGene00006702	ubc-3	protein_coding	.	.	.	.	.	1698176	1697967	1698174	1697965	True	True	True	False	False	False	False	False	False	False	False	False	False	False	False	False	False	False	False	False	False	False	False	False	False	False	False	False	False
chrI	1701838	1701989	chrI	1701836	1701987	coding_promoter	coding_promoter	unassigned_promoter	WBGene00022153	Y71G12B.13	protein_coding	.	.	.	.	.	1701975	1701885	1701973	1701883	True	True	True	True	True	True	True	True	True	True	True	True	True	False	False	False	False	False	False	False	True	False	False	False	False	False	True	True	False
chrI	1715207	1715358	chrI	1715205	1715356	putative_enhancer	no_transcription	transcription_initiation	.	.	.	.	.	.	WBGene00022152	atg-5	1715342	1715271	1715340	1715269	False	True	False	False	False	False	False	False	False	False	False	False	False	False	False	False	False	False	False	False	False	False	False	False	False	False	False	False	False
chrI	1717510	1717661	chrI	1717508	1717659	coding_promoter	coding_promoter	transcription_initiation	WBGene00006771	tln-1	protein_coding	.	.	.	.	.	1717640	1717649	1717638	1717647	True	True	True	False	False	False	False	False	False	False	False	False	False	False	False	False	False	False	False	False	False	True	False	False	False	False	False	False	False
chrI	1719151	1719302	chrI	1719149	1719300	coding_promoter	coding_promoter	transcription_initiation	WBGene00006771	tln-1	protein_coding	.	.	.	.	.	1719268	1719121	1719266	1719119	True	True	False	True	True	False	False	False	False	False	False	False	False	False	False	False	False	False	False	True	False	False	False	False	False	False	False	False	False
chrI	1720665	1720816	chrI	1720663	1720814	unassigned_promoter	transcription_initiation	unassigned_promoter	.	.	.	.	.	.	WBGene00006771	tln-1	1720841	1720684	1720839	1720682	True	True	False	False	False	False	False	False	False	False	False	False	False	False	False	False	False	False	False	False	False	False	False	True	True	True	True	True	True
chrI	1721587	1721738	chrI	1721585	1721736	putative_enhancer	transcription_initiation	no_transcription	.	.	.	.	.	.	WBGene00006771	tln-1	1721603	1721602	1721601	1721600	True	False	False	False	False	False	False	False	False	False	False	False	False	False	False	False	False	False	False	False	False	True	False	False	False	False	False	False	False
chrI	1722650	1722801	chrI	1722648	1722799	putative_enhancer	transcription_initiation	transcription_initiation	.	.	.	.	.	.	WBGene00006771	tln-1	1722771	1722612	1722769	1722610	True	True	False	False	False	False	False	False	False	False	False	False	False	False	False	False	False	False	False	False	False	False	False	False	False	False	False	False	False
chrI	1728929	1729080	chrI	1728927	1729078	other_element	no_transcription	no_transcription	.	.	.	.	.	.	WBGene00006771	tln-1	1729064	1728944	1729062	1728942	False	False	False	False	False	False	False	False	False	False	False	False	False	False	False	False	False	False	False	False	False	False	False	False	False	False	False	False	False
chrI	1729647	1729798	chrI	1729645	1729796	coding_promoter	coding_promoter	transcription_initiation	WBGene00006771	tln-1	protein_coding	.	.	.	.	.	1729795	1729697	1729793	1729695	True	True	False	False	False	True	True	False	False	False	False	False	False	False	False	False	False	False	False	False	False	False	False	False	False	False	False	False	False
chrI	1731062	1731213	chrI	1731060	1731211	putative_enhancer	transcription_initiation	transcription_initiation	.	.	.	.	.	.	WBGene00006771	tln-1	1731194	1731087	1731192	1731085	True	True	False	False	False	False	False	False	False	False	False	False	False	False	False	False	False	False	False	False	False	False	False	False	False	False	False	False	False
chrI	1740765	1740916	chrI	1740763	1740914	putative_enhancer	transcription_initiation	transcription_initiation	.	.	.	.	.	.	WBGene00022159	mppa-1	1740789	1740739	1740787	1740737	True	True	False	False	False	False	False	False	False	False	False	False	False	False	False	False	False	False	False	False	False	False	False	False	False	False	False	False	False
chrI	1751082	1751233	chrI	1751080	1751231	coding_promoter	coding_promoter	coding_promoter	WBGene00022150	Y71G12B.10	protein_coding	WBGene00022159	mppa-1	protein_coding	.	.	1751178	1751097	1751176	1751095	True	False	False	False	True	False	True	False	False	False	False	False	False	True	True	True	True	True	False	False	False	False	False	False	True	True	True	True	True
chrI	1774660	1774811	chrI	1774658	1774809	other_element	no_transcription	no_transcription	.	.	.	.	.	.	WBGene00022148,WBGene00022160	Y71G12B.25,ddx-27	1774795	1774675	1774793	1774673	False	False	False	False	False	False	False	False	False	False	False	False	False	False	False	False	False	False	False	False	False	False	False	False	False	False	False	False	False
chrI	1777441	1777592	chrI	1777439	1777590	putative_enhancer	transcription_initiation	transcription_initiation	.	.	.	.	.	.	WBGene00022148,WBGene00022160	Y71G12B.25,ddx-27	1777508	1777413	1777506	1777411	True	True	False	False	False	False	False	False	False	False	False	False	False	False	False	False	False	False	False	False	False	False	False	False	False	False	False	False	False
chrI	1778779	1778930	chrI	1778777	1778928	coding_promoter	transcription_initiation	coding_promoter	.	.	.	WBGene00022160	Y71G12B.25	protein_coding	.	.	1778884	1778734	1778882	1778732	True	True	False	False	False	False	False	False	False	False	False	False	False	False	False	False	False	False	False	False	False	False	False	False	True	True	True	True	True
chrI	1791809	1791960	chrI	1791807	1791958	other_element	no_transcription	no_transcription	.	.	.	.	.	.	.	.	1791944	1791824	1791942	1791822	False	False	False	False	False	False	False	False	False	False	False	False	False	False	False	False	False	False	False	False	False	False	False	False	False	False	False	False	False
chrI	1792634	1792785	chrI	1792632	1792783	coding_promoter	coding_promoter	unassigned_promoter	WBGene00022146	Y71G12B.6	protein_coding	.	.	.	.	.	1792782	1792646	1792780	1792644	True	True	True	False	False	False	False	False	False	False	False	False	False	False	False	False	False	False	False	False	False	False	False	False	True	False	False	False	False
chrI	1793072	1793223	chrI	1793070	1793221	other_element	no_transcription	no_transcription	.	.	.	.	.	.	WBGene00022146	Y71G12B.6	1793207	1793087	1793205	1793085	False	False	True	True	False	True	True	True	True	True	True	True	True	False	False	False	False	False	False	False	False	False	False	False	False	False	False	False	False
chrI	1797275	1797426	chrI	1797273	1797424	other_element	no_transcription	no_transcription	.	.	.	.	.	.	.	.	1797410	1797290	1797408	1797288	False	False	False	False	False	False	False	False	False	False	False	False	False	False	False	False	False	False	False	False	False	False	False	True	False	False	False	False	False
chrI	1800166	1800317	chrI	1800164	1800315	putative_enhancer	transcription_initiation	no_transcription	.	.	.	.	.	.	WBGene00022145	Y71G12B.5	1800309	1800181	1800307	1800179	True	False	False	False	False	False	False	False	False	False	False	False	False	True	False	False	False	False	False	False	False	False	False	False	False	False	False	False	False
chrI	1807963	1808114	chrI	1807961	1808112	coding_promoter	coding_promoter	unassigned_promoter	WBGene00022144	pghm-1	protein_coding	.	.	.	.	.	1808097	1807944	1808095	1807942	True	True	False	True	True	True	True	True	True	True	True	True	True	True	True	True	True	True	True	True	True	True	True	True	False	False	True	False	False
chrI	1808646	1808797	chrI	1808644	1808795	other_element	no_transcription	no_transcription	.	.	.	.	.	.	WBGene00022144	pghm-1	1808781	1808661	1808779	1808659	False	False	False	False	False	False	False	False	False	False	False	False	False	False	False	False	False	False	False	False	False	False	False	False	False	False	False	False	False
chrI	1809754	1809905	chrI	1809752	1809903	unassigned_promoter	no_transcription	unassigned_promoter	.	.	.	.	.	.	WBGene00022144	pghm-1	1809889	1809795	1809887	1809793	False	True	False	False	False	False	False	False	False	False	False	False	False	False	False	False	False	False	False	False	False	False	False	False	True	False	False	False	False
chrI	1815939	1816090	chrI	1815937	1816088	coding_promoter	coding_promoter	coding_promoter	WBGene00022142	Y71G12B.2	protein_coding	WBGene00044349	Y71G12B.32	protein_coding	.	.	1816130	1816077	1816128	1816075	True	True	False	True	True	True	True	False	True	True	True	True	True	False	False	True	True	True	False	True	True	True	True	True	False	False	True	False	False
chrI	1823038	1823189	chrI	1823036	1823187	coding_promoter	no_transcription	coding_promoter	.	.	.	WBGene00044347	Y71G12B.30	protein_coding	.	.	1823173	1823041	1823171	1823039	False	True	False	False	False	False	False	False	False	False	False	False	False	True	False	True	False	False	True	False	False	False	False	False	False	False	False	False	True
chrI	1823210	1823361	chrI	1823208	1823359	coding_promoter	coding_promoter	transcription_initiation	WBGene00022141	chaf-2	protein_coding	.	.	.	.	.	1823328	1823259	1823326	1823257	True	True	True	True	True	True	True	True	False	False	False	False	False	False	False	True	True	False	False	True	False	False	False	False	False	False	False	False	False
chrI	1825964	1826115	chrI	1825962	1826113	other_element	no_transcription	no_transcription	.	.	.	.	.	.	WBGene00022141	chaf-2	1826099	1825979	1826097	1825977	False	False	False	False	False	False	False	False	False	False	False	False	False	False	False	False	False	False	False	False	False	False	False	False	False	False	False	False	False
chrI	1826205	1826356	chrI	1826203	1826354	other_element	no_transcription	no_transcription	.	.	.	.	.	.	.	.	1826340	1826220	1826338	1826218	False	False	False	False	False	False	False	False	False	False	False	False	False	False	False	False	False	False	False	False	False	False	False	False	False	False	False	False	False
chrI	1832205	1832356	chrI	1832203	1832354	putative_enhancer	transcription_initiation	transcription_initiation	.	.	.	.	.	.	WBGene00044746	C53H9.3	1832245	1832385	1832243	1832383	True	True	False	False	False	False	False	False	False	False	False	False	False	False	False	False	False	False	False	False	False	False	False	False	False	False	False	False	False
chrI	1832613	1832764	chrI	1832611	1832762	coding_promoter	coding_promoter	coding_promoter	WBGene00016907	C53H9.2	protein_coding	WBGene00044746	C53H9.3	protein_coding	.	.	1832740	1832625	1832738	1832623	True	True	True	True	True	True	True	True	True	True	True	True	True	True	True	True	True	True	True	True	True	True	True	True	False	True	True	False	True
chrI	1834889	1835040	chrI	1834887	1835038	putative_enhancer	transcription_initiation	transcription_initiation	.	.	.	.	.	.	WBGene00004441,WBGene00044746	C53H9.3,rpl-27	1834982	1834943	1834980	1834941	True	True	False	False	False	False	False	False	False	False	False	False	False	False	False	False	False	False	False	False	False	False	False	False	False	False	False	False	False
chrI	1835095	1835246	chrI	1835093	1835244	putative_enhancer	transcription_initiation	transcription_initiation	.	.	.	.	.	.	WBGene00004441,WBGene00044746	C53H9.3,rpl-27	1835146	1835143	1835144	1835141	True	True	False	False	False	False	False	False	False	False	False	False	False	False	False	False	False	False	False	False	False	False	False	False	False	False	False	False	False
chrI	1835533	1835684	chrI	1835531	1835682	coding_promoter	coding_promoter	coding_promoter	WBGene00001196	egl-30	protein_coding	WBGene00044746	C53H9.3	protein_coding	.	.	1835683	1835525	1835681	1835523	True	True	True	True	True	True	True	True	True	True	True	True	True	False	False	False	False	False	False	False	False	False	False	False	True	True	True	True	True
chrI	1836212	1836363	chrI	1836210	1836361	putative_enhancer	transcription_initiation	transcription_initiation	.	.	.	.	.	.	WBGene00001196	egl-30	1836339	1836411	1836337	1836409	True	True	False	False	False	False	False	False	False	False	False	False	False	False	False	False	False	False	False	False	False	False	False	False	False	False	False	False	False
chrI	1836350	1836501	chrI	1836348	1836499	putative_enhancer	transcription_initiation	transcription_initiation	.	.	.	.	.	.	WBGene00001196	egl-30	1836339	1836427	1836337	1836425	True	True	False	False	False	False	False	False	False	False	False	False	False	False	False	False	False	False	False	False	False	False	False	False	False	False	False	False	False
chrI	1836469	1836620	chrI	1836467	1836618	unassigned_promoter	transcription_initiation	unassigned_promoter	.	.	.	.	.	.	WBGene00001196	egl-30	1836529	1836427	1836527	1836425	True	True	False	False	False	False	False	False	False	False	False	False	False	False	False	False	False	False	False	False	False	False	False	False	False	True	True	True	False
chrI	1836782	1836933	chrI	1836780	1836931	putative_enhancer	transcription_initiation	transcription_initiation	.	.	.	.	.	.	WBGene00001196	egl-30	1836777	1836889	1836775	1836887	True	True	False	False	False	False	False	False	False	False	False	False	False	False	False	False	False	False	False	False	False	False	False	False	False	False	False	False	False
chrI	1836993	1837144	chrI	1836991	1837142	putative_enhancer	transcription_initiation	transcription_initiation	.	.	.	.	.	.	WBGene00001196	egl-30	1837162	1837114	1837160	1837112	True	True	False	False	False	False	False	False	False	False	False	False	False	False	False	False	False	False	False	False	False	False	False	False	False	False	False	False	False
chrI	1837679	1837830	chrI	1837677	1837828	other_element	no_transcription	no_transcription	.	.	.	.	.	.	WBGene00001196	egl-30	1837814	1837694	1837812	1837692	False	False	False	False	False	False	False	False	False	False	False	False	False	False	False	False	False	False	False	False	False	False	False	False	False	False	False	False	False
chrI	1839749	1839900	chrI	1839747	1839898	unassigned_promoter	no_transcription	unassigned_promoter	.	.	.	.	.	.	WBGene00001196	egl-30	1839884	1839802	1839882	1839800	False	True	False	False	False	False	False	False	False	False	False	False	False	False	False	False	False	False	False	False	False	False	False	False	False	True	False	False	False
chrI	1840860	1841011	chrI	1840858	1841009	putative_enhancer	transcription_initiation	transcription_initiation	.	.	.	.	.	.	WBGene00001196	egl-30	1840897	1840857	1840895	1840855	True	True	False	False	False	False	False	False	False	False	False	False	False	False	False	False	False	False	False	False	False	False	False	False	False	False	False	False	False
chrI	1841203	1841354	chrI	1841201	1841352	putative_enhancer	transcription_initiation	no_transcription	.	.	.	.	.	.	WBGene00001196	egl-30	1841304	1841218	1841302	1841216	True	False	False	False	False	False	False	False	False	False	False	False	False	False	False	False	False	False	False	False	False	False	False	False	False	False	False	False	False
chrI	1842009	1842160	chrI	1842007	1842158	putative_enhancer	transcription_initiation	transcription_initiation	.	.	.	.	.	.	.	.	1842156	1842020	1842154	1842018	True	True	False	False	False	False	False	False	False	False	False	False	False	False	False	False	False	False	False	False	False	False	False	False	False	False	False	False	False
chrI	1842435	1842586	chrI	1842433	1842584	coding_promoter	coding_promoter	no_transcription	WBGene00001309	emr-1	protein_coding	.	.	.	.	.	1842449	1842450	1842447	1842448	True	False	True	True	True	True	True	True	False	False	False	False	False	False	False	False	False	False	False	False	False	False	False	False	False	False	False	False	False
chrI	1845024	1845175	chrI	1845022	1845173	coding_promoter	coding_promoter	transcription_initiation	WBGene00006461	tag-96	protein_coding	.	.	.	.	.	1845194	1845071	1845192	1845069	True	True	False	False	False	False	True	False	False	False	False	False	False	False	False	False	False	False	False	False	False	False	False	False	False	False	False	False	False
chrI	1852707	1852858	chrI	1852705	1852856	putative_enhancer	transcription_initiation	no_transcription	.	.	.	.	.	.	WBGene00044897	M01D7.9	1852843	1852722	1852841	1852720	True	False	False	False	False	False	False	False	False	False	False	False	False	False	False	False	False	False	False	False	False	False	False	False	False	False	False	False	False
chrI	1853010	1853161	chrI	1853008	1853159	coding_promoter	no_transcription	coding_promoter	.	.	.	WBGene00044897	M01D7.9	protein_coding	.	.	1853145	1853093	1853143	1853091	False	True	False	False	False	False	False	False	False	False	False	False	False	False	False	False	False	False	False	False	False	False	False	False	True	False	False	True	True
chrI	1861842	1861993	chrI	1861840	1861991	putative_enhancer	transcription_initiation	transcription_initiation	.	.	.	.	.	.	.	.	1861847	1861843	1861845	1861841	True	True	False	False	False	False	False	False	False	False	False	False	False	False	False	False	False	False	False	False	False	False	False	False	False	False	False	False	False
chrI	1869124	1869275	chrI	1869122	1869273	putative_enhancer	transcription_initiation	transcription_initiation	.	.	.	.	.	.	WBGene00004743	scm-1	1869231	1869272	1869229	1869270	True	True	False	False	False	False	False	False	False	False	False	False	False	False	False	False	False	False	False	False	False	False	False	False	False	False	False	False	False
chrI	1870848	1870999	chrI	1870846	1870997	putative_enhancer	transcription_initiation	transcription_initiation	.	.	.	.	.	.	WBGene00004743	scm-1	1870935	1870978	1870933	1870976	True	True	False	False	False	False	False	False	False	False	False	False	False	False	False	False	False	False	False	False	False	False	False	False	False	False	False	False	False
chrI	1872350	1872501	chrI	1872348	1872499	putative_enhancer	transcription_initiation	transcription_initiation	.	.	.	.	.	.	WBGene00004743	scm-1	1872534	1872419	1872532	1872417	True	True	False	False	False	False	False	False	False	False	False	False	False	False	False	False	False	False	False	False	False	False	True	False	False	False	False	False	False
chrI	1872572	1872723	chrI	1872570	1872721	coding_promoter	transcription_initiation	coding_promoter	.	.	.	WBGene00004743	scm-1	protein_coding	.	.	1872534	1872587	1872532	1872585	True	False	False	False	False	False	False	False	False	False	False	False	False	False	False	False	False	False	False	False	False	False	False	False	False	False	False	False	True
chrI	1873860	1874011	chrI	1873858	1874009	coding_promoter	coding_promoter	unassigned_promoter	WBGene00022139	tub-2	protein_coding	.	.	.	.	.	1874039	1873937	1874037	1873935	True	True	True	True	True	True	True	True	True	True	True	True	True	False	False	False	False	False	False	False	True	False	False	False	True	True	True	True	True
chrI	1874544	1874695	chrI	1874542	1874693	putative_enhancer	transcription_initiation	transcription_initiation	.	.	.	.	.	.	WBGene00022139	tub-2	1874639	1874521	1874637	1874519	True	True	False	False	False	False	False	False	False	False	False	False	False	False	False	False	False	False	False	False	False	False	False	False	False	False	False	False	False
chrI	1876526	1876677	chrI	1876524	1876675	other_element	no_transcription	no_transcription	.	.	.	.	.	.	WBGene00022139	tub-2	1876661	1876541	1876659	1876539	False	False	False	False	False	False	False	False	False	False	False	False	False	False	False	False	False	False	False	False	False	False	False	False	False	False	False	False	False
chrI	1877774	1877925	chrI	1877772	1877923	unassigned_promoter	transcription_initiation	unassigned_promoter	.	.	.	.	.	.	WBGene00022139	tub-2	1877884	1877728	1877882	1877726	True	True	False	False	False	False	False	False	False	False	False	False	False	False	False	False	False	False	False	False	False	False	False	False	False	True	True	True	False
chrI	1878110	1878261	chrI	1878108	1878259	other_element	no_transcription	no_transcription	.	.	.	.	.	.	WBGene00022139	tub-2	1878245	1878125	1878243	1878123	False	False	False	False	False	False	False	False	False	False	False	False	False	False	False	False	False	False	False	False	False	False	False	False	False	False	False	False	False
chrI	1878915	1879066	chrI	1878913	1879064	other_element	no_transcription	no_transcription	.	.	.	.	.	.	WBGene00022139	tub-2	1879050	1878930	1879048	1878928	False	False	False	False	False	False	False	False	False	False	False	False	False	False	False	False	False	False	False	False	False	False	False	False	False	False	False	False	False
chrI	1888646	1888797	chrI	1888644	1888795	other_element	no_transcription	no_transcription	.	.	.	.	.	.	WBGene00022140	Y71G12A.4	1888781	1888661	1888779	1888659	False	False	False	False	False	False	False	False	False	False	False	False	False	False	False	False	False	False	False	False	False	False	False	False	False	False	False	False	False
chrI	1895052	1895203	chrI	1895050	1895201	coding_promoter	coding_promoter	coding_promoter	WBGene00022138	trpp-10	protein_coding	WBGene00022140	Y71G12A.4	protein_coding	.	.	1895188	1895067	1895186	1895065	True	False	True	True	True	True	True	True	True	True	True	True	True	True	True	True	True	True	False	True	True	True	True	True	False	False	False	False	False
chrI	1911723	1911874	chrI	1911721	1911872	putative_enhancer	transcription_initiation	transcription_initiation	.	.	.	.	.	.	WBGene00021768,WBGene00022138	Y51F10.7,trpp-10	1911707	1911867	1911705	1911865	True	True	True	True	False	False	False	False	False	False	False	False	False	False	False	False	False	False	False	False	False	False	False	False	False	False	False	False	False
chrI	1913986	1914137	chrI	1913984	1914135	coding_promoter	transcription_initiation	coding_promoter	.	.	.	WBGene00021768	Y51F10.7	protein_coding	.	.	1914179	1913936	1914177	1913934	True	True	False	False	False	False	False	False	False	False	False	False	False	False	False	False	False	False	False	False	False	False	True	False	True	True	True	True	True
chrI	1915963	1916114	chrI	1915961	1916112	putative_enhancer	transcription_initiation	transcription_initiation	.	.	.	.	.	.	WBGene00021768,WBGene00022138	Y51F10.7,trpp-10	1916010	1916042	1916008	1916040	True	True	False	False	False	False	False	False	False	False	False	False	False	False	False	False	False	False	False	False	False	False	False	False	False	False	False	False	False
chrI	1916802	1916953	chrI	1916800	1916951	putative_enhancer	transcription_initiation	no_transcription	.	.	.	.	.	.	WBGene00021768,WBGene00022138	Y51F10.7,trpp-10	1916963	1916817	1916961	1916815	True	False	False	False	False	True	True	True	False	False	True	False	True	False	False	False	False	False	False	False	False	False	False	False	False	False	False	False	False
chrI	1919287	1919438	chrI	1919285	1919436	coding_promoter	transcription_initiation	coding_promoter	.	.	.	WBGene00021768	Y51F10.7	protein_coding	.	.	1919453	1919313	1919451	1919311	True	True	False	False	False	False	False	False	False	False	False	False	False	False	False	False	False	False	False	False	False	False	False	False	False	True	True	False	False
chrI	1943238	1943389	chrI	1943236	1943387	other_element	no_transcription	no_transcription	.	.	.	.	.	.	WBGene00021765	Y51F10.4	1943373	1943253	1943371	1943251	False	False	True	True	True	False	True	True	True	False	False	True	True	False	False	False	False	False	True	False	True	False	True	False	False	False	False	False	False
chrI	1958475	1958626	chrI	1958472	1958623	coding_promoter	coding_promoter	coding_promoter	WBGene00044438	Y51F10.11	protein_coding	WBGene00021771	spe-48	protein_coding	.	.	1958626	1958505	1958623	1958502	True	True	True	True	True	True	True	True	False	False	True	True	True	False	False	False	False	False	False	False	True	True	True	True	True	True	True	True	True
chrI	1972698	1972849	chrI	1972695	1972846	putative_enhancer	transcription_initiation	no_transcription	.	.	.	.	.	.	WBGene00021764	Y51F10.3	1972837	1972713	1972834	1972710	True	False	False	False	False	False	False	False	False	False	False	False	False	False	False	False	False	False	False	False	False	False	False	False	False	False	False	False	False
chrI	1977982	1978133	chrI	1977979	1978130	putative_enhancer	transcription_initiation	no_transcription	.	.	.	.	.	.	WBGene00021763	Y51F10.2	1978019	1977997	1978016	1977994	True	False	False	False	False	False	False	False	False	False	False	False	False	False	False	False	False	False	False	False	False	False	False	False	False	False	False	False	False
chrI	1978249	1978400	chrI	1978246	1978397	coding_promoter	coding_promoter	transcription_initiation	WBGene00021763	Y51F10.2	protein_coding	.	.	.	.	.	1978384	1978315	1978381	1978312	False	True	False	False	True	True	True	True	False	False	False	False	True	False	False	False	False	False	False	False	False	False	True	True	False	False	False	False	False
chrI	1978567	1978718	chrI	1978564	1978715	putative_enhancer	transcription_initiation	transcription_initiation	.	.	.	.	.	.	WBGene00021763	Y51F10.2	1978600	1978645	1978597	1978642	True	True	False	False	False	False	False	False	False	False	False	False	False	False	False	False	False	False	False	False	False	False	False	False	False	False	False	False	False
chrI	1978817	1978968	chrI	1978814	1978965	putative_enhancer	transcription_initiation	no_transcription	.	.	.	.	.	.	WBGene00021763	Y51F10.2	1978859	1978832	1978856	1978829	True	False	False	False	False	False	False	False	False	False	False	False	False	False	False	False	False	False	False	False	True	False	False	False	False	False	False	False	False
chrI	1979491	1979642	chrI	1979488	1979639	putative_enhancer	transcription_initiation	transcription_initiation	.	.	.	.	.	.	WBGene00021763	Y51F10.2	1979556	1979547	1979553	1979544	True	True	False	False	False	False	False	False	False	False	False	False	False	False	False	False	False	False	False	False	False	False	False	False	False	False	False	False	False
chrI	2002398	2002549	chrI	2002395	2002546	unassigned_promoter	unassigned_promoter	no_transcription	.	.	.	.	.	.	WBGene00021238	gap-3	2002578	2002413	2002575	2002410	True	False	True	False	False	False	True	True	False	False	False	False	False	True	False	False	True	True	True	False	False	False	False	False	False	False	False	False	False
chrI	2011299	2011450	chrI	2011296	2011447	coding_promoter	transcription_initiation	coding_promoter	.	.	.	WBGene00021238	gap-3	protein_coding	.	.	2011465	2011319	2011462	2011316	True	True	False	False	False	False	False	False	False	False	False	False	False	False	False	True	False	False	True	False	False	False	False	False	True	False	False	False	False
chrI	2016804	2016955	chrI	2016801	2016952	putative_enhancer	transcription_initiation	no_transcription	.	.	.	.	.	.	.	.	2016869	2016819	2016866	2016816	True	False	False	False	False	False	False	False	False	False	False	False	False	False	False	False	False	False	False	False	False	False	False	False	False	False	False	False	False
chrI	2019505	2019656	chrI	2019502	2019653	coding_promoter	coding_promoter	transcription_initiation	WBGene00021237	crtc-1	protein_coding	.	.	.	.	.	2019655	2019575	2019652	2019572	True	True	False	False	True	True	False	False	False	False	False	False	False	False	False	False	False	False	False	False	False	False	False	False	False	False	False	False	False
chrI	2020052	2020203	chrI	2020049	2020200	unassigned_promoter	transcription_initiation	unassigned_promoter	.	.	.	.	.	.	WBGene00021237	crtc-1	2020174	2020062	2020171	2020059	True	True	False	False	False	False	False	False	False	False	False	False	False	False	False	False	False	False	False	False	False	False	False	False	False	False	False	False	False
chrI	2021311	2021462	chrI	2021308	2021459	unassigned_promoter	transcription_initiation	unassigned_promoter	.	.	.	.	.	.	WBGene00021237	crtc-1	2021452	2021328	2021449	2021325	True	True	False	False	False	False	False	False	False	False	False	False	False	False	False	False	False	False	False	False	False	False	False	False	False	True	True	False	False
chrI	2023322	2023473	chrI	2023319	2023470	putative_enhancer	transcription_initiation	transcription_initiation	.	.	.	.	.	.	WBGene00021237	crtc-1	2023480	2023320	2023477	2023317	True	True	False	False	False	False	False	False	False	False	False	False	False	False	False	False	False	False	False	False	False	False	False	False	False	False	False	False	False
chrI	2024698	2024849	chrI	2024695	2024846	unassigned_promoter	transcription_initiation	unassigned_promoter	.	.	.	.	.	.	WBGene00021237	crtc-1	2024857	2024692	2024854	2024689	True	True	False	False	False	False	False	False	False	False	False	False	False	False	False	False	False	False	False	False	False	False	False	False	False	False	True	False	False
chrI	2026128	2026279	chrI	2026125	2026276	coding_promoter	coding_promoter	transcription_initiation	WBGene00021237	crtc-1	protein_coding	.	.	.	.	.	2026244	2026117	2026241	2026114	True	True	True	True	True	True	True	True	True	True	True	True	True	False	False	False	False	False	False	False	False	False	False	False	False	False	False	False	False
chrI	2034184	2034335	chrI	2034181	2034332	other_element	no_transcription	no_transcription	.	.	.	.	.	.	.	.	2034319	2034199	2034316	2034196	False	False	False	False	False	False	False	False	False	False	False	False	False	False	False	False	False	False	False	False	False	False	False	False	False	False	False	False	False
chrI	2034550	2034701	chrI	2034547	2034698	other_element	no_transcription	no_transcription	.	.	.	.	.	.	WBGene00021239	Y20F4.4	2034685	2034565	2034682	2034562	False	False	False	False	False	False	False	False	False	False	False	False	False	False	False	False	False	False	False	False	False	False	False	False	False	False	False	False	False
chrI	2041159	2041310	chrI	2041156	2041307	putative_enhancer	transcription_initiation	no_transcription	.	.	.	.	.	.	WBGene00021239	Y20F4.4	2041235	2041174	2041232	2041171	True	False	False	False	False	False	False	False	False	False	False	False	False	False	False	False	True	False	False	False	False	False	False	True	False	False	False	False	False
chrI	2045036	2045187	chrI	2045033	2045184	coding_promoter	transcription_initiation	coding_promoter	.	.	.	WBGene00021239	Y20F4.4	protein_coding	.	.	2045176	2045073	2045173	2045070	True	True	False	False	False	False	False	False	False	False	False	False	False	False	False	False	False	False	False	False	False	False	False	False	True	False	True	False	False
chrI	2045218	2045369	chrI	2045215	2045366	putative_enhancer	transcription_initiation	no_transcription	.	.	.	.	.	.	.	.	2045176	2045233	2045173	2045230	True	False	False	False	False	False	False	False	False	False	False	False	False	False	False	False	False	False	False	False	False	False	False	False	True	False	True	False	False
chrI	2047168	2047319	chrI	2047165	2047316	putative_enhancer	transcription_initiation	transcription_initiation	.	.	.	.	.	.	.	.	2047306	2047226	2047303	2047223	True	True	False	False	False	False	False	False	False	False	False	False	False	False	False	False	False	False	False	False	False	False	False	False	False	False	False	False	False
chrI	2049152	2049303	chrI	2049149	2049300	putative_enhancer	transcription_initiation	no_transcription	.	.	.	.	.	.	WBGene00044435	Y20F4.8	2049254	2049167	2049251	2049164	True	False	False	False	False	False	False	False	False	False	False	False	False	False	False	False	False	False	False	False	False	False	False	False	False	False	False	False	False
chrI	2050077	2050228	chrI	2050074	2050225	putative_enhancer	no_transcription	transcription_initiation	.	.	.	.	.	.	WBGene00044435	Y20F4.8	2050212	2050123	2050209	2050120	False	True	False	False	False	False	False	False	False	False	False	False	False	False	False	False	False	False	False	False	False	False	False	False	True	True	True	True	True
chrI	2054726	2054877	chrI	2054723	2054874	putative_enhancer	transcription_initiation	no_transcription	.	.	.	.	.	.	.	.	2054884	2054741	2054881	2054738	True	False	False	False	False	False	False	False	False	False	False	False	False	False	False	False	False	False	False	False	False	False	False	False	False	False	False	False	False
chrI	2061357	2061508	chrI	2061354	2061505	putative_enhancer	transcription_initiation	transcription_initiation	.	.	.	.	.	.	.	.	2061539	2061381	2061536	2061378	True	True	False	False	False	False	False	False	False	False	False	False	False	False	True	False	True	True	True	False	False	False	False	False	False	False	False	False	False
chrI	2062627	2062778	chrI	2062624	2062775	putative_enhancer	transcription_initiation	transcription_initiation	.	.	.	.	.	.	WBGene00021346	Y37E3.1	2062799	2062800	2062796	2062797	True	True	False	False	False	False	False	False	False	False	False	False	False	False	False	False	False	False	True	False	False	False	False	False	False	False	False	False	False
chrI	2064000	2064151	chrI	2063997	2064148	coding_promoter	coding_promoter	coding_promoter	WBGene00021347	rpb-10	protein_coding	WBGene00021346	Y37E3.1	protein_coding	.	.	2064124	2064000	2064121	2063997	True	True	True	True	True	True	True	True	True	False	True	True	True	False	False	False	False	False	False	True	False	False	True	True	True	True	True	True	True
chrI	2064388	2064539	chrI	2064385	2064536	other_element	no_transcription	no_transcription	.	.	.	.	.	.	WBGene00021347	rpb-10	2064523	2064403	2064520	2064400	False	False	False	False	False	False	False	False	False	False	False	False	False	False	False	False	False	False	False	False	False	False	False	False	False	False	False	False	False
chrI	2064820	2064971	chrI	2064817	2064968	coding_promoter	coding_promoter	transcription_initiation	WBGene00021348	moag-4	protein_coding	.	.	.	.	.	2064911	2064870	2064908	2064867	True	True	True	True	True	True	True	True	True	True	True	True	True	False	False	False	False	False	False	False	False	False	False	False	False	False	False	False	False
chrI	2065560	2065711	chrI	2065557	2065708	putative_enhancer	transcription_initiation	transcription_initiation	.	.	.	.	.	.	.	.	2065689	2065547	2065686	2065544	True	True	False	False	False	False	False	False	False	False	False	False	False	False	False	False	False	False	False	False	False	False	False	False	False	False	False	False	False
chrI	2066860	2067011	chrI	2066857	2067008	other_element	no_transcription	no_transcription	.	.	.	.	.	.	WBGene00021349	arl-13	2066995	2066875	2066992	2066872	False	False	False	False	False	False	False	False	False	False	False	False	False	False	False	False	False	False	False	False	False	False	False	False	False	False	False	False	False
chrI	2068962	2069113	chrI	2068959	2069110	putative_enhancer	no_transcription	transcription_initiation	.	.	.	.	.	.	WBGene00004409,WBGene00021349	arl-13,rla-1	2069097	2069147	2069094	2069144	False	True	False	False	False	False	False	False	False	False	False	False	False	False	False	False	False	False	False	False	False	False	False	False	False	False	False	False	False
chrI	2069318	2069469	chrI	2069315	2069466	putative_enhancer	transcription_initiation	transcription_initiation	.	.	.	.	.	.	WBGene00004409	rla-1	2069417	2069386	2069414	2069383	True	True	False	False	False	False	False	False	False	False	False	False	False	False	False	False	False	False	False	False	False	False	False	False	False	False	False	False	False
chrI	2070004	2070155	chrI	2070001	2070152	non-coding_RNA	transcription_initiation	non-coding_RNA	.	.	.	WBGene00044932	Y37E3.22	snoRNA	.	.	2070098	2069970	2070095	2069967	True	True	False	False	False	False	False	False	False	False	False	False	False	False	False	False	True	False	False	False	False	False	False	False	False	False	False	False	False
chrI	2070371	2070522	chrI	2070368	2070519	non-coding_RNA	no_transcription	non-coding_RNA	.	.	.	WBGene00044931	Y37E3.21	snoRNA	.	.	2070506	2070484	2070503	2070481	False	True	False	False	False	False	False	False	False	False	False	False	False	False	False	False	False	False	False	False	False	False	False	False	False	False	False	False	False
chrI	2070822	2070973	chrI	2070819	2070970	coding_promoter	coding_promoter	coding_promoter	WBGene00004014	phb-1	protein_coding	WBGene00021350	Y37E3.8	protein_coding	.	.	2070959	2070829	2070956	2070826	True	True	False	True	True	True	False	False	False	False	False	False	False	False	True	False	True	True	False	False	False	True	False	True	True	True	True	True	True
chrI	2074564	2074715	chrI	2074561	2074712	putative_enhancer	transcription_initiation	no_transcription	.	.	.	.	.	.	WBGene00021351	eif-2alpha	2074734	2074579	2074731	2074576	True	False	True	True	True	True	True	True	True	True	True	True	True	False	False	False	False	False	False	False	False	False	False	False	False	False	False	False	False
chrI	2076964	2077115	chrI	2076961	2077112	putative_enhancer	transcription_initiation	transcription_initiation	.	.	.	.	.	.	.	.	2077088	2076982	2077085	2076979	True	True	False	False	False	False	False	False	False	False	False	False	False	False	False	False	False	False	False	False	False	False	False	False	False	False	False	False	False
chrI	2078149	2078300	chrI	2078146	2078297	putative_enhancer	transcription_initiation	transcription_initiation	.	.	.	.	.	.	.	.	2078254	2078156	2078251	2078153	True	True	False	False	False	False	False	False	False	False	False	False	False	False	False	False	False	False	False	False	False	False	False	False	False	False	False	False	False
chrI	2084302	2084453	chrI	2084299	2084450	coding_promoter	coding_promoter	unassigned_promoter	WBGene00021352	Y37E3.11	protein_coding	.	.	.	.	.	2084374	2084321	2084371	2084318	True	True	False	False	False	True	True	True	False	False	True	False	False	False	False	False	False	False	False	False	False	False	False	False	False	False	True	False	False
chrI	2084936	2085087	chrI	2084933	2085084	non-coding_RNA	non-coding_RNA	transcription_initiation	WBGene00044925	Y37E3.20	snoRNA	.	.	.	.	.	2085040	2085045	2085037	2085042	True	True	True	False	True	True	True	True	True	True	True	True	True	False	False	False	False	False	False	False	False	False	False	False	False	False	False	False	False
chrI	2086445	2086596	chrI	2086442	2086593	other_element	no_transcription	no_transcription	.	.	.	.	.	.	WBGene00003799,WBGene00021353	iglr-3,npp-13	2086580	2086460	2086577	2086457	False	False	False	False	False	False	False	False	False	False	False	False	False	False	False	False	False	False	False	False	False	False	False	False	False	False	False	False	False
chrI	2088931	2089082	chrI	2088928	2089079	putative_enhancer	no_transcription	transcription_initiation	.	.	.	.	.	.	WBGene00003799,WBGene00021353	iglr-3,npp-13	2089066	2089050	2089063	2089047	False	True	False	False	False	False	False	False	False	False	False	False	False	False	False	True	False	False	False	False	False	False	False	False	False	False	False	False	False
chrI	2095190	2095341	chrI	2095187	2095338	coding_promoter	transcription_initiation	coding_promoter	.	.	.	WBGene00021353	iglr-3	protein_coding	.	.	2095363	2095240	2095360	2095237	True	True	False	False	False	False	False	False	False	False	False	False	False	True	False	False	False	False	False	False	False	False	False	False	False	True	True	False	False
chrI	2097021	2097172	chrI	2097018	2097169	coding_promoter	coding_promoter	transcription_initiation	WBGene00003799	npp-13	protein_coding	.	.	.	.	.	2097118	2097045	2097115	2097042	True	True	True	True	True	True	True	True	True	False	False	False	False	False	False	False	False	False	False	True	False	False	False	False	False	False	False	False	False
chrI	2100043	2100194	chrI	2100040	2100191	other_element	no_transcription	no_transcription	.	.	.	.	.	.	WBGene00003799	npp-13	2100178	2100058	2100175	2100055	False	False	False	False	False	False	False	False	False	False	False	False	False	False	False	False	False	False	False	False	False	False	False	False	False	False	False	False	False
chrI	2118329	2118480	chrI	2118326	2118477	putative_enhancer	transcription_initiation	transcription_initiation	.	.	.	.	.	.	WBGene00003799,WBGene00021354	fpn-1.1,npp-13	2118489	2118376	2118486	2118373	True	True	False	False	False	False	False	False	False	False	False	False	False	False	False	False	False	False	False	False	False	False	False	False	False	False	False	False	False
chrI	2119381	2119532	chrI	2119378	2119529	coding_promoter	transcription_initiation	coding_promoter	.	.	.	WBGene00021354	fpn-1.1	protein_coding	.	.	2119484	2119430	2119481	2119427	True	True	False	False	False	False	False	False	False	False	False	False	False	False	False	False	False	False	False	False	False	False	False	False	False	False	False	False	True
chrI	2120743	2120894	chrI	2120740	2120891	putative_enhancer	transcription_initiation	transcription_initiation	.	.	.	.	.	.	WBGene00003799	npp-13	2120844	2120783	2120841	2120780	True	True	False	False	False	False	False	False	False	False	False	False	False	False	False	False	False	False	False	False	False	False	False	False	False	False	False	False	False
chrI	2125222	2125373	chrI	2125219	2125370	putative_enhancer	transcription_initiation	transcription_initiation	.	.	.	.	.	.	.	.	2125335	2125192	2125332	2125189	True	True	False	False	False	False	False	False	False	False	False	False	False	False	False	False	False	False	False	False	False	False	False	False	False	False	False	False	False
chrI	2126823	2126974	chrI	2126820	2126971	coding_promoter	coding_promoter	transcription_initiation	WBGene00021355	Y37E3.17	protein_coding	.	.	.	.	.	2126948	2126830	2126945	2126827	True	True	False	False	True	False	False	False	False	False	False	False	False	False	False	False	False	False	False	False	False	False	False	False	False	False	False	False	False
chrI	2143633	2143784	chrI	2143630	2143781	other_element	no_transcription	no_transcription	.	.	.	.	.	.	WBGene00021355	Y37E3.17	2143768	2143648	2143765	2143645	False	False	False	False	False	False	False	False	False	False	False	False	False	False	False	False	False	False	False	False	False	False	False	False	False	False	False	False	False
chrI	2147831	2147982	chrI	2147828	2147979	putative_enhancer	no_transcription	transcription_initiation	.	.	.	.	.	.	.	.	2147966	2147889	2147963	2147886	False	True	False	False	False	False	False	False	False	False	False	False	False	False	False	False	False	False	False	False	False	False	False	False	False	False	False	False	False
chrI	2151768	2151919	chrI	2151765	2151916	coding_promoter	transcription_initiation	coding_promoter	.	.	.	WBGene00235158	Y37E3.30	protein_coding	.	.	2151947	2151801	2151944	2151798	True	True	False	False	False	False	False	False	False	False	False	False	False	False	False	False	False	False	False	False	False	False	False	False	False	False	False	False	False
chrI	2154007	2154158	chrI	2154004	2154155	putative_enhancer	transcription_initiation	transcription_initiation	.	.	.	.	.	.	WBGene00235158	Y37E3.30	2154120	2154001	2154117	2153998	True	True	False	False	False	False	False	False	False	False	False	False	False	False	False	False	False	False	False	False	False	False	False	False	False	False	False	False	False
chrI	2155581	2155732	chrI	2155578	2155729	unassigned_promoter	unassigned_promoter	transcription_initiation	.	.	.	.	.	.	WBGene00235158	Y37E3.30	2155764	2155607	2155761	2155604	True	True	True	True	True	True	False	True	False	False	False	False	False	False	False	True	True	False	True	False	False	False	False	False	False	False	False	False	False
chrI	2155984	2156135	chrI	2155981	2156132	putative_enhancer	transcription_initiation	transcription_initiation	.	.	.	.	.	.	WBGene00235158	Y37E3.30	2156077	2155962	2156074	2155959	True	True	False	False	False	False	False	False	False	False	False	False	False	False	False	False	False	False	False	False	False	False	False	False	False	False	False	False	False
chrI	2156240	2156391	chrI	2156237	2156388	other_element	no_transcription	no_transcription	.	.	.	.	.	.	WBGene00235158	Y37E3.30	2156375	2156255	2156372	2156252	False	False	False	False	False	False	False	False	False	False	False	False	False	False	False	False	False	False	False	False	False	False	False	False	False	False	False	False	False
chrI	2156657	2156808	chrI	2156654	2156805	other_element	no_transcription	no_transcription	.	.	.	.	.	.	WBGene00235158	Y37E3.30	2156792	2156672	2156789	2156669	False	False	True	True	False	False	False	True	False	False	False	False	False	False	False	False	False	False	False	False	False	False	False	True	False	True	False	False	False
chrI	2157137	2157288	chrI	2157134	2157285	coding_promoter	transcription_initiation	coding_promoter	.	.	.	WBGene00235158	Y37E3.30	protein_coding	.	.	2157273	2157174	2157270	2157171	True	True	False	False	False	False	False	False	False	False	False	False	False	False	False	False	False	False	False	False	False	False	False	False	False	True	True	True	False
chrI	2167905	2168056	chrI	2167903	2168054	putative_enhancer	transcription_initiation	transcription_initiation	.	.	.	.	.	.	WBGene00021009	afd-1	2168042	2167942	2168040	2167940	True	True	False	False	True	False	False	True	True	True	True	True	True	False	False	False	False	False	False	False	False	False	True	False	False	False	False	False	False
chrI	2169913	2170064	chrI	2169911	2170062	unassigned_promoter	transcription_initiation	unassigned_promoter	.	.	.	.	.	.	WBGene00021009	afd-1	2170023	2169937	2170021	2169935	True	True	False	False	False	False	False	False	False	False	False	False	False	False	False	False	False	False	False	False	False	False	False	False	False	False	False	True	False
chrI	2170463	2170614	chrI	2170461	2170612	putative_enhancer	transcription_initiation	no_transcription	.	.	.	.	.	.	WBGene00021009	afd-1	2170595	2170478	2170593	2170476	True	False	False	False	False	False	False	False	False	False	False	False	False	False	False	False	False	False	False	False	False	False	False	False	False	False	False	False	False
chrI	2176886	2177037	chrI	2176884	2177035	putative_enhancer	transcription_initiation	no_transcription	.	.	.	.	.	.	WBGene00021009	afd-1	2177044	2176901	2177042	2176899	True	False	False	False	False	False	False	False	False	False	False	False	False	False	False	False	False	False	False	False	False	False	False	False	False	False	False	False	False
chrI	2178145	2178296	chrI	2178143	2178294	putative_enhancer	transcription_initiation	transcription_initiation	.	.	.	.	.	.	WBGene00021009	afd-1	2178325	2178156	2178323	2178154	True	True	False	False	False	False	False	False	False	False	False	False	False	False	False	False	False	False	False	False	False	False	False	False	False	False	False	False	False
chrI	2179962	2180113	chrI	2179960	2180111	putative_enhancer	transcription_initiation	transcription_initiation	.	.	.	.	.	.	WBGene00021009	afd-1	2180150	2180097	2180148	2180095	True	True	False	False	False	False	False	False	False	False	False	False	False	False	False	False	False	False	False	True	False	False	False	False	False	False	False	False	False
chrI	2182926	2183077	chrI	2182924	2183075	putative_enhancer	transcription_initiation	no_transcription	.	.	.	.	.	.	WBGene00021009	afd-1	2182992	2182941	2182990	2182939	True	False	False	False	False	False	False	False	False	False	False	False	False	False	False	False	False	False	False	False	False	False	False	False	False	False	False	False	False
chrI	2184917	2185068	chrI	2184915	2185066	putative_enhancer	transcription_initiation	transcription_initiation	.	.	.	.	.	.	WBGene00021009	afd-1	2185017	2185008	2185015	2185006	True	True	False	False	False	False	False	False	False	False	False	False	False	False	False	False	False	False	False	False	False	False	False	False	False	False	False	False	False
chrI	2186553	2186704	chrI	2186551	2186702	putative_enhancer	transcription_initiation	no_transcription	.	.	.	.	.	.	WBGene00021009	afd-1	2186635	2186568	2186633	2186566	True	False	False	False	False	False	False	False	False	False	False	False	False	False	False	False	False	False	False	False	False	False	False	False	False	False	False	False	False
chrI	2187265	2187416	chrI	2187263	2187414	putative_enhancer	transcription_initiation	no_transcription	.	.	.	.	.	.	WBGene00021009	afd-1	2187360	2187280	2187358	2187278	True	False	False	False	False	False	False	False	False	False	False	False	False	False	False	False	False	False	False	False	False	False	False	False	False	False	False	False	False
chrI	2189464	2189615	chrI	2189462	2189613	putative_enhancer	transcription_initiation	transcription_initiation	.	.	.	.	.	.	WBGene00021009	afd-1	2189578	2189480	2189576	2189478	True	True	False	False	False	False	False	False	False	False	False	False	False	False	False	False	False	False	False	False	False	False	False	False	False	False	False	False	False
chrI	2190534	2190685	chrI	2190532	2190683	unassigned_promoter	transcription_initiation	unassigned_promoter	.	.	.	.	.	.	WBGene00021009	afd-1	2190714	2190551	2190712	2190549	True	True	False	False	False	False	False	False	False	False	False	False	False	False	False	False	False	False	False	False	False	False	False	False	False	False	True	False	False
chrI	2191352	2191503	chrI	2191350	2191501	putative_enhancer	transcription_initiation	transcription_initiation	.	.	.	.	.	.	WBGene00021009	afd-1	2191465	2191366	2191463	2191364	True	True	False	False	False	False	False	False	False	False	False	False	False	False	False	False	False	False	False	False	False	False	False	False	False	False	False	False	False
chrI	2192526	2192677	chrI	2192524	2192675	other_element	no_transcription	no_transcription	.	.	.	.	.	.	WBGene00021009	afd-1	2192661	2192541	2192659	2192539	False	False	False	False	False	False	False	False	False	False	False	False	False	False	False	False	False	False	False	False	False	False	False	False	False	False	False	False	False
chrI	2210397	2210548	chrI	2210395	2210546	other_element	no_transcription	no_transcription	.	.	.	.	.	.	.	.	2210532	2210412	2210530	2210410	False	False	False	False	False	False	False	False	False	False	False	False	False	False	False	False	False	False	False	False	False	False	False	False	False	False	False	False	False
chrI	2211703	2211854	chrI	2211701	2211852	unassigned_promoter	unassigned_promoter	no_transcription	.	.	.	.	.	.	.	.	2211702	2211718	2211700	2211716	True	False	False	True	False	False	True	False	False	False	False	False	False	False	False	True	True	False	False	False	False	False	False	False	False	False	False	False	False
chrI	2212179	2212330	chrI	2212177	2212328	putative_enhancer	transcription_initiation	no_transcription	.	.	.	.	.	.	.	.	2212238	2212194	2212236	2212192	True	False	False	False	False	False	False	False	False	False	False	False	False	False	False	False	False	False	False	True	False	True	False	False	False	False	False	False	False
chrI	2219109	2219260	chrI	2219107	2219258	other_element	no_transcription	no_transcription	.	.	.	.	.	.	WBGene00021008	W03F11.5	2219244	2219124	2219242	2219122	False	False	False	False	False	False	False	False	False	False	False	False	False	False	False	False	False	False	False	False	False	False	False	False	False	False	False	False	False
chrI	2219608	2219759	chrI	2219606	2219757	other_element	no_transcription	no_transcription	.	.	.	.	.	.	WBGene00021005	ule-1	2219743	2219623	2219741	2219621	False	False	False	False	False	False	False	False	False	False	False	False	False	False	False	False	False	False	False	False	False	False	False	False	False	False	False	False	False
chrI	2220779	2220930	chrI	2220777	2220928	other_element	no_transcription	no_transcription	.	.	.	.	.	.	WBGene00021005	ule-1	2220914	2220794	2220912	2220792	False	False	False	False	False	False	False	False	False	False	False	False	False	False	False	False	False	False	False	False	False	False	False	False	False	False	False	False	False
chrI	2247717	2247868	chrI	2247715	2247866	coding_promoter	coding_promoter	no_transcription	WBGene00017398	slc-17.6	protein_coding	.	.	.	.	.	2247808	2247732	2247806	2247730	True	False	False	True	True	True	False	False	True	False	False	True	True	True	True	True	True	True	False	True	False	True	True	True	False	False	False	False	False
chrI	2249233	2249384	chrI	2249231	2249382	coding_promoter	coding_promoter	transcription_initiation	WBGene00017398	slc-17.6	protein_coding	.	.	.	.	.	2249332	2249238	2249330	2249236	True	True	False	True	True	False	False	False	False	True	True	False	False	False	False	False	False	False	False	False	False	False	False	False	False	False	False	False	False
chrI	2250775	2250926	chrI	2250773	2250924	unassigned_promoter	transcription_initiation	unassigned_promoter	.	.	.	.	.	.	WBGene00017398,WBGene00021007	W03F11.4,slc-17.6	2250896	2250882	2250894	2250880	True	True	False	False	False	False	False	False	False	False	False	False	False	False	False	False	False	False	False	False	False	False	False	False	False	False	False	False	False
chrI	2253966	2254117	chrI	2253964	2254115	putative_enhancer	no_transcription	transcription_initiation	.	.	.	.	.	.	WBGene00017398,WBGene00021007	W03F11.4,slc-17.6	2254101	2253974	2254099	2253972	False	True	False	False	False	False	False	False	False	False	False	False	False	False	False	False	False	False	False	False	False	False	False	False	False	False	False	False	False
chrI	2272376	2272527	chrI	2272374	2272525	non-coding_RNA	no_transcription	non-coding_RNA	.	.	.	WBGene00023176	Y39G10AL.t1	tRNA	.	.	2272511	2272441	2272509	2272439	False	True	False	False	False	False	False	False	False	False	False	False	False	False	False	False	False	False	False	False	False	False	False	False	False	False	False	False	False
chrI	2273066	2273217	chrI	2273064	2273215	putative_enhancer	no_transcription	transcription_initiation	.	.	.	.	.	.	WBGene00000020	abt-2	2273201	2273052	2273199	2273050	False	True	False	False	False	False	False	False	False	False	False	False	False	False	False	False	False	False	False	False	False	False	False	False	False	False	False	False	False
chrI	2277048	2277199	chrI	2277046	2277197	coding_promoter	transcription_initiation	coding_promoter	.	.	.	WBGene00000020	abt-2	protein_coding	.	.	2277175	2277057	2277173	2277055	True	True	False	False	False	False	False	False	False	False	False	False	False	False	False	True	False	False	True	False	False	False	False	False	False	True	True	True	False
chrI	2280408	2280559	chrI	2280406	2280557	coding_promoter	coding_promoter	transcription_initiation	WBGene00021458	Y39G10AL.1	protein_coding	.	.	.	.	.	2280427	2280504	2280425	2280502	True	True	True	False	False	False	False	False	False	False	True	False	False	False	False	False	False	False	False	False	False	False	False	True	False	False	False	False	False
chrI	2291155	2291306	chrI	2291153	2291304	coding_promoter	coding_promoter	coding_promoter	WBGene00021469	Y39G10AR.11	protein_coding	WBGene00000408	cdk-7	protein_coding	.	.	2291313	2291130	2291311	2291128	True	True	True	True	True	True	True	False	True	False	False	True	False	False	False	False	True	False	True	True	True	False	False	False	True	False	True	False	False
chrI	2291504	2291655	chrI	2291502	2291653	putative_enhancer	transcription_initiation	transcription_initiation	.	.	.	.	.	.	WBGene00021469	Y39G10AR.11	2291657	2291558	2291655	2291556	True	True	False	False	False	False	False	False	False	False	False	False	False	False	False	False	False	False	False	False	False	False	False	False	False	False	False	False	False
chrI	2292871	2293022	chrI	2292869	2293020	coding_promoter	coding_promoter	unassigned_promoter	WBGene00021469	Y39G10AR.11	protein_coding	.	.	.	.	.	2292974	2292857	2292972	2292855	True	True	True	True	True	True	True	True	True	True	True	True	True	False	False	False	False	False	False	False	False	False	False	False	False	False	False	False	False
chrI	2296033	2296184	chrI	2296031	2296182	other_element	no_transcription	no_transcription	.	.	.	.	.	.	WBGene00021469	Y39G10AR.11	2296168	2296048	2296166	2296046	False	False	True	True	True	True	True	True	True	True	True	True	True	False	False	False	False	False	False	False	False	False	False	False	False	False	False	False	False
chrI	2299698	2299849	chrI	2299696	2299847	coding_promoter	coding_promoter	transcription_initiation	WBGene00021468	epg-2	protein_coding	.	.	.	.	.	2299863	2299701	2299861	2299699	True	True	True	True	True	False	False	False	False	False	False	False	False	False	False	True	False	False	False	False	False	False	False	False	False	False	False	False	False
chrI	2302824	2302975	chrI	2302822	2302973	putative_enhancer	transcription_initiation	transcription_initiation	.	.	.	.	.	.	WBGene00021468,WBGene00021470	epg-2,tpxl-1	2302824	2302817	2302822	2302815	True	True	False	False	False	False	False	False	False	False	False	False	False	False	False	False	False	False	False	False	False	False	False	False	False	False	False	False	False
chrI	2304234	2304385	chrI	2304232	2304383	coding_promoter	no_transcription	coding_promoter	.	.	.	WBGene00021470	tpxl-1	protein_coding	.	.	2304369	2304409	2304367	2304407	False	True	False	False	False	False	False	False	False	False	False	False	False	False	False	False	False	False	False	False	False	False	False	False	False	False	False	False	False
chrI	2306051	2306202	chrI	2306049	2306200	putative_enhancer	transcription_initiation	transcription_initiation	.	.	.	.	.	.	WBGene00002047	icp-1	2306107	2306037	2306105	2306035	True	True	False	False	False	False	False	False	False	False	False	False	False	False	False	False	False	False	False	False	False	False	False	False	False	False	False	False	False
chrI	2306843	2306994	chrI	2306841	2306992	coding_promoter	coding_promoter	coding_promoter	WBGene00021467	Y39G10AR.9	protein_coding	WBGene00002047	icp-1	protein_coding	.	.	2306959	2306891	2306957	2306889	True	True	True	True	True	True	True	True	True	False	True	True	True	False	False	True	False	False	False	True	True	True	True	True	True	True	True	True	True
chrI	2307202	2307353	chrI	2307200	2307351	coding_promoter	transcription_initiation	coding_promoter	.	.	.	WBGene00002047	icp-1	protein_coding	.	.	2307283	2307195	2307281	2307193	True	True	True	True	False	True	True	True	True	True	True	True	True	False	False	False	False	False	False	False	True	False	False	False	False	False	True	True	True
chrI	2308623	2308774	chrI	2308621	2308772	other_element	no_transcription	no_transcription	.	.	.	.	.	.	WBGene00021467	Y39G10AR.9	2308758	2308638	2308756	2308636	False	False	False	False	False	False	False	False	False	False	False	False	False	False	False	False	False	False	False	False	False	False	False	False	False	False	False	False	False
chrI	2309309	2309460	chrI	2309307	2309458	unassigned_promoter	transcription_initiation	unassigned_promoter	.	.	.	.	.	.	WBGene00021476	nsun-4	2309438	2309340	2309436	2309338	True	True	False	False	False	False	False	True	False	False	False	False	True	False	False	False	False	False	False	False	False	False	False	False	False	False	False	False	True
chrI	2311816	2311967	chrI	2311814	2311965	putative_enhancer	transcription_initiation	transcription_initiation	.	.	.	.	.	.	WBGene00021476	nsun-4	2311995	2311878	2311993	2311876	True	True	False	False	False	False	False	False	False	False	False	False	False	False	False	False	False	False	False	False	False	False	False	False	False	False	False	False	False
chrI	2312235	2312386	chrI	2312233	2312384	coding_promoter	coding_promoter	transcription_initiation	WBGene00021475	tbca-1	protein_coding	.	.	.	.	.	2312392	2312326	2312390	2312324	True	True	True	True	True	True	True	True	False	True	True	True	True	False	False	False	False	False	True	False	False	False	False	False	False	False	False	False	False
chrI	2313049	2313200	chrI	2313047	2313198	coding_promoter	coding_promoter	unassigned_promoter	WBGene00021466	eif-2gamma	protein_coding	.	.	.	.	.	2313181	2313067	2313179	2313065	True	True	True	True	True	True	True	True	True	True	True	True	True	False	False	False	False	False	False	False	True	False	False	False	True	True	True	True	True
chrI	2316036	2316187	chrI	2316034	2316185	coding_promoter	coding_promoter	transcription_initiation	WBGene00021465	ekl-7	protein_coding	.	.	.	.	.	2316181	2316042	2316179	2316040	True	True	True	True	True	True	True	True	False	False	False	False	False	False	False	False	False	False	False	False	False	False	False	False	False	False	False	False	False
chrI	2318516	2318667	chrI	2318514	2318665	putative_enhancer	transcription_initiation	transcription_initiation	.	.	.	.	.	.	WBGene00003156	mcm-4	2318673	2318713	2318671	2318711	True	True	False	False	False	False	False	False	False	False	False	False	False	False	False	False	False	False	False	False	False	False	False	False	False	False	False	False	False
chrI	2318812	2318963	chrI	2318810	2318961	putative_enhancer	transcription_initiation	transcription_initiation	.	.	.	.	.	.	WBGene00003156	mcm-4	2318998	2318808	2318996	2318806	True	True	False	False	False	False	False	False	False	False	False	False	False	False	False	True	False	False	True	False	False	False	False	False	False	False	False	False	False
chrI	2321888	2322039	chrI	2321886	2322037	coding_promoter	unassigned_promoter	coding_promoter	.	.	.	WBGene00003156	mcm-4	protein_coding	.	.	2322036	2321914	2322034	2321912	True	True	False	True	False	False	False	False	False	False	False	False	False	False	True	True	False	True	False	False	False	False	False	False	True	True	True	True	True
chrI	2322682	2322833	chrI	2322680	2322831	coding_promoter	no_transcription	coding_promoter	.	.	.	WBGene00219275	Y39G10AR.32	protein_coding	.	.	2322817	2322755	2322815	2322753	False	True	False	False	False	False	False	False	False	False	False	False	False	False	False	False	False	False	True	False	False	False	False	False	True	True	True	True	True
chrI	2322933	2323084	chrI	2322931	2323082	putative_enhancer	transcription_initiation	no_transcription	.	.	.	.	.	.	.	.	2322953	2322948	2322951	2322946	True	False	False	False	False	False	False	False	False	False	False	False	False	False	False	False	False	False	False	False	False	False	False	False	False	False	False	False	False
chrI	2333146	2333297	chrI	2333144	2333295	coding_promoter	coding_promoter	no_transcription	WBGene00021464	ugt-31	protein_coding	.	.	.	.	.	2333327	2333161	2333325	2333159	True	False	False	True	False	True	True	True	False	True	False	False	True	False	False	False	True	True	True	False	True	False	False	True	False	False	False	False	False
chrI	2335476	2335627	chrI	2335474	2335625	putative_enhancer	transcription_initiation	transcription_initiation	.	.	.	.	.	.	WBGene00021464	ugt-31	2335540	2335550	2335538	2335548	True	True	False	False	False	False	False	False	False	False	False	False	False	False	False	False	False	False	False	False	False	False	False	False	False	False	False	False	False
chrI	2339860	2340011	chrI	2339858	2340009	other_element	no_transcription	no_transcription	.	.	.	.	.	.	.	.	2339995	2339875	2339993	2339873	False	False	False	False	False	False	False	False	False	False	False	False	False	False	False	False	False	False	False	False	False	False	False	False	False	False	False	False	False
chrI	2342137	2342288	chrI	2342135	2342286	coding_promoter	coding_promoter	transcription_initiation	WBGene00021463	zeel-1	protein_coding	.	.	.	.	.	2342292	2342148	2342290	2342146	True	True	True	False	False	False	False	True	False	False	False	False	False	False	False	False	False	False	True	False	False	False	False	False	False	False	False	False	False
chrI	2354931	2355082	chrI	2354929	2355080	putative_enhancer	no_transcription	transcription_initiation	.	.	.	.	.	.	WBGene00077563	peel-1	2355066	2354919	2355064	2354917	False	True	False	False	False	False	False	False	False	False	False	False	False	False	False	False	False	False	False	False	False	False	False	False	False	False	False	False	False
chrI	2385119	2385270	chrI	2385117	2385268	putative_enhancer	no_transcription	transcription_initiation	.	.	.	.	.	.	WBGene00021474	dot-1.1	2385254	2385243	2385252	2385241	False	True	False	False	False	False	False	False	False	False	False	False	False	False	False	False	False	False	False	False	False	False	False	False	True	True	False	True	True
chrI	2385959	2386110	chrI	2385957	2386108	other_element	no_transcription	no_transcription	.	.	.	.	.	.	WBGene00021474	dot-1.1	2386094	2385974	2386092	2385972	False	False	False	False	False	False	False	False	False	False	False	False	False	False	False	False	False	False	False	False	False	False	False	True	False	False	False	False	False
chrI	2390938	2391089	chrI	2390936	2391087	putative_enhancer	no_transcription	transcription_initiation	.	.	.	.	.	.	WBGene00021474	dot-1.1	2391073	2390937	2391071	2390935	False	True	False	False	False	False	False	False	False	False	False	False	False	False	False	False	False	False	False	False	False	False	False	False	False	False	False	False	False
chrI	2393447	2393598	chrI	2393445	2393596	coding_promoter	unassigned_promoter	coding_promoter	.	.	.	WBGene00021474	dot-1.1	protein_coding	.	.	2393575	2393407	2393573	2393405	True	True	True	False	False	False	False	False	False	False	False	False	False	True	False	True	False	False	False	False	False	False	False	False	True	True	True	True	True
chrI	2395055	2395206	chrI	2395053	2395204	other_element	no_transcription	no_transcription	.	.	.	.	.	.	WBGene00021474	dot-1.1	2395190	2395070	2395188	2395068	False	False	False	False	False	False	False	False	False	False	False	False	False	False	False	False	False	False	False	False	False	False	False	False	False	False	False	False	False
chrI	2401583	2401734	chrI	2401581	2401732	coding_promoter	coding_promoter	coding_promoter	WBGene00021460	zwl-1	protein_coding	WBGene00021474	dot-1.1	protein_coding	.	.	2401693	2401605	2401691	2401603	True	True	False	False	False	False	False	False	False	False	False	False	False	False	False	False	False	False	False	False	False	False	False	False	True	True	True	True	True
chrI	2404739	2404890	chrI	2404737	2404888	putative_enhancer	transcription_initiation	transcription_initiation	.	.	.	.	.	.	WBGene00021460	zwl-1	2404724	2404811	2404722	2404809	True	True	False	False	False	False	False	False	False	False	False	False	False	False	False	False	False	False	False	False	False	False	False	False	False	False	False	False	False
chrI	2405034	2405185	chrI	2405032	2405183	other_element	no_transcription	no_transcription	.	.	.	.	.	.	WBGene00021460	zwl-1	2405169	2405049	2405167	2405047	False	False	False	False	False	False	False	False	False	False	False	False	False	False	False	False	False	False	False	False	False	False	False	False	False	False	False	False	False
chrI	2405522	2405673	chrI	2405520	2405671	other_element	no_transcription	no_transcription	.	.	.	.	.	.	WBGene00021460	zwl-1	2405657	2405537	2405655	2405535	False	False	False	False	False	False	False	False	False	False	False	False	False	False	False	False	False	False	False	False	False	False	False	False	False	False	False	False	False
chrI	2410072	2410223	chrI	2410070	2410221	non-coding_RNA	non-coding_RNA	no_transcription	WBGene00044926	Y39G10AR.24	snoRNA	.	.	.	.	.	2410191	2410087	2410189	2410085	True	False	False	False	False	False	False	False	False	False	False	False	False	False	False	False	False	False	False	False	False	False	False	False	False	False	False	False	False
chrI	2411717	2411868	chrI	2411715	2411866	putative_enhancer	transcription_initiation	transcription_initiation	.	.	.	.	.	.	WBGene00017741	F23C8.13	2411798	2411854	2411796	2411852	True	True	False	False	False	False	False	False	False	False	False	False	False	False	False	False	True	True	True	False	False	False	False	False	False	False	False	False	False
chrI	2413090	2413241	chrI	2413088	2413239	other_element	no_transcription	no_transcription	.	.	.	.	.	.	WBGene00017741	F23C8.13	2413225	2413105	2413223	2413103	False	False	False	False	False	False	False	False	False	False	False	False	False	False	False	False	False	False	False	False	False	False	False	False	False	False	False	False	False
chrI	2413570	2413721	chrI	2413568	2413719	putative_enhancer	transcription_initiation	transcription_initiation	.	.	.	.	.	.	WBGene00017741	F23C8.13	2413709	2413555	2413707	2413553	True	True	False	False	False	False	False	False	False	False	False	False	False	False	False	False	False	False	False	False	False	False	False	False	False	False	False	False	False
chrI	2414160	2414311	chrI	2414158	2414309	putative_enhancer	transcription_initiation	transcription_initiation	.	.	.	.	.	.	WBGene00017741	F23C8.13	2414252	2414237	2414250	2414235	True	True	False	False	False	False	False	False	False	False	False	False	False	False	False	False	False	False	False	False	False	False	False	False	False	False	False	False	False
chrI	2420299	2420450	chrI	2420297	2420448	coding_promoter	no_transcription	coding_promoter	.	.	.	WBGene00017734	F23C8.5	protein_coding	.	.	2420434	2420374	2420432	2420372	False	True	False	False	False	False	False	False	False	False	False	False	False	False	False	False	False	False	False	False	False	False	False	False	True	True	True	True	False
chrI	2420602	2420753	chrI	2420600	2420751	coding_promoter	unassigned_promoter	coding_promoter	.	.	.	WBGene00017734	F23C8.5	protein_coding	.	.	2420720	2420608	2420718	2420606	True	True	False	True	True	False	False	False	False	False	False	False	False	False	True	True	False	True	False	False	False	False	False	False	False	False	False	False	True
chrI	2421001	2421152	chrI	2420999	2421150	putative_enhancer	transcription_initiation	transcription_initiation	.	.	.	.	.	.	WBGene00017735	did-2	2421041	2420995	2421039	2420993	True	True	False	False	False	False	False	False	False	False	False	False	False	False	False	False	False	False	False	False	True	False	True	False	False	False	False	False	False
chrI	2421223	2421374	chrI	2421221	2421372	putative_enhancer	transcription_initiation	transcription_initiation	.	.	.	.	.	.	WBGene00017735	did-2	2421300	2421289	2421298	2421287	True	True	False	False	False	False	False	False	False	False	False	False	False	False	False	False	False	False	False	False	False	False	False	False	False	False	False	False	False
chrI	2421775	2421926	chrI	2421773	2421924	coding_promoter	transcription_initiation	coding_promoter	.	.	.	WBGene00017735	did-2	protein_coding	.	.	2421899	2421817	2421897	2421815	True	True	False	False	False	False	False	False	False	False	False	False	False	False	False	False	False	False	False	False	False	False	False	False	True	True	True	True	True
chrI	2427735	2427886	chrI	2427733	2427884	other_element	no_transcription	no_transcription	.	.	.	.	.	.	WBGene00017736	F23C8.7	2427870	2427750	2427868	2427748	False	False	False	False	False	False	True	False	False	False	True	True	True	False	False	True	False	True	False	True	False	True	False	True	False	False	False	False	False
chrI	2428010	2428161	chrI	2428008	2428159	putative_enhancer	transcription_initiation	no_transcription	.	.	.	.	.	.	WBGene00017736	F23C8.7	2428177	2428025	2428175	2428023	True	False	False	False	False	False	False	False	False	False	False	False	False	False	False	False	False	False	False	False	False	False	False	False	False	False	False	False	False
chrI	2428670	2428821	chrI	2428668	2428819	coding_promoter	transcription_initiation	coding_promoter	.	.	.	WBGene00017736	F23C8.7	protein_coding	.	.	2428728	2428822	2428726	2428820	True	True	False	False	False	False	False	False	False	False	False	False	False	False	False	False	False	False	False	False	False	False	False	False	False	False	True	True	False
chrI	2432030	2432181	chrI	2432028	2432179	putative_enhancer	no_transcription	transcription_initiation	.	.	.	.	.	.	WBGene00017737	F23C8.8	2432165	2432126	2432163	2432124	False	True	False	False	False	False	False	False	False	False	False	False	False	False	False	False	False	False	False	False	False	False	False	False	False	False	False	False	True
chrI	2432279	2432430	chrI	2432277	2432428	putative_enhancer	transcription_initiation	no_transcription	.	.	.	.	.	.	WBGene00017737	F23C8.8	2432429	2432294	2432427	2432292	True	False	False	False	False	False	False	False	False	False	False	False	False	False	False	False	False	False	True	False	False	False	False	False	False	False	False	False	False
chrI	2433683	2433834	chrI	2433681	2433832	coding_promoter	coding_promoter	coding_promoter	WBGene00017733	ubxn-1	protein_coding	WBGene00017738	tipn-1	protein_coding	.	.	2433789	2433679	2433787	2433677	True	True	True	True	True	True	True	True	True	False	False	True	True	True	True	True	True	True	False	True	True	True	True	True	True	True	True	True	True
chrI	2434067	2434218	chrI	2434065	2434216	other_element	no_transcription	no_transcription	.	.	.	.	.	.	WBGene00017733	ubxn-1	2434202	2434082	2434200	2434080	False	False	False	False	False	False	False	False	False	False	False	False	False	False	False	False	False	False	False	False	False	False	False	False	False	False	False	False	False
chrI	2436048	2436199	chrI	2436046	2436197	putative_enhancer	transcription_initiation	no_transcription	.	.	.	.	.	.	.	.	2436208	2436063	2436206	2436061	True	False	False	False	False	False	False	False	False	False	False	False	False	False	False	False	False	False	False	False	False	False	False	False	False	False	False	False	False
chrI	2436820	2436971	chrI	2436818	2436969	coding_promoter	coding_promoter	transcription_initiation	WBGene00017732	F23C8.3	protein_coding	.	.	.	.	.	2436908	2436822	2436906	2436820	True	True	False	False	False	False	False	False	False	False	False	False	False	False	False	True	False	False	False	False	False	False	False	False	True	False	False	False	True
chrI	2437030	2437181	chrI	2437028	2437179	putative_enhancer	transcription_initiation	transcription_initiation	.	.	.	.	.	.	WBGene00017732,WBGene00255457	F23C8.14,F23C8.3	2437160	2437057	2437158	2437055	True	True	False	False	False	False	False	False	False	False	False	False	False	False	False	False	False	False	False	False	False	False	False	False	True	False	False	False	False
chrI	2437571	2437722	chrI	2437569	2437720	coding_promoter	transcription_initiation	coding_promoter	.	.	.	WBGene00255457	F23C8.14	protein_coding	.	.	2437702	2437593	2437700	2437591	True	True	False	False	False	False	False	False	False	False	False	False	False	False	False	False	False	False	False	False	False	False	False	False	False	False	False	False	False
chrI	2464683	2464834	chrI	2464681	2464832	coding_promoter	transcription_initiation	coding_promoter	.	.	.	WBGene00002141	inx-19	protein_coding	.	.	2464821	2464794	2464819	2464792	True	True	False	False	False	False	False	False	False	False	False	False	False	False	False	False	False	False	False	False	False	False	False	False	False	False	False	False	False
chrI	2470920	2471071	chrI	2470918	2471069	putative_enhancer	no_transcription	transcription_initiation	.	.	.	.	.	.	WBGene00022280	Y74C10AL.2	2471055	2470987	2471053	2470985	False	True	False	False	False	False	False	False	False	False	False	False	False	False	False	False	False	False	False	False	False	False	False	False	False	False	False	False	False
chrI	2485218	2485369	chrI	2485216	2485367	putative_enhancer	no_transcription	transcription_initiation	.	.	.	.	.	.	WBGene00022281	abtm-1	2485353	2485335	2485351	2485333	False	True	False	False	False	False	False	False	False	False	False	False	False	False	False	False	False	False	False	False	False	False	False	False	False	False	False	False	False
chrI	2485573	2485724	chrI	2485571	2485722	coding_promoter	coding_promoter	coding_promoter	WBGene00001232	eif-3.I	protein_coding	WBGene00022281	abtm-1	protein_coding	.	.	2485712	2485621	2485710	2485619	True	True	True	True	True	True	True	True	True	True	True	True	True	True	False	True	False	True	True	True	True	True	True	False	True	True	True	True	True
chrI	2487836	2487987	chrI	2487834	2487985	other_element	no_transcription	no_transcription	.	.	.	.	.	.	WBGene00001232	eif-3.I	2487971	2487851	2487969	2487849	False	False	False	False	False	False	False	False	False	False	False	False	False	False	False	False	False	False	False	False	False	False	False	False	False	False	False	False	False
chrI	2489847	2489998	chrI	2489845	2489996	coding_promoter	coding_promoter	no_transcription	WBGene00021277	Y23H5B.6	protein_coding	.	.	.	.	.	2489975	2489862	2489973	2489860	True	False	True	True	True	True	True	True	True	False	True	True	True	False	False	False	True	False	True	False	False	False	False	False	False	False	False	False	False
chrI	2513775	2513926	chrI	2513773	2513924	pseudogene_promoter	no_transcription	pseudogene_promoter	.	.	.	WBGene00021278	Y23H5B.7	pseudogene	.	.	2513910	2513827	2513908	2513825	False	True	False	False	False	False	False	False	False	False	False	False	False	True	False	False	False	False	True	False	False	False	False	False	False	False	False	False	False
chrI	2514247	2514398	chrI	2514245	2514396	pseudogene_promoter	no_transcription	pseudogene_promoter	.	.	.	WBGene00021278	Y23H5B.7	pseudogene	.	.	2514382	2514311	2514380	2514309	False	True	False	False	False	False	False	False	False	False	False	False	False	False	False	False	False	False	False	False	False	False	False	False	False	True	False	False	False
chrI	2516682	2516833	chrI	2516680	2516831	unassigned_promoter	unassigned_promoter	transcription_initiation	.	.	.	.	.	.	.	.	2516864	2516820	2516862	2516818	True	True	False	False	False	True	False	False	False	False	False	True	True	False	False	False	True	True	False	False	False	True	True	True	False	False	False	False	False
chrI	2517800	2517951	chrI	2517798	2517949	other_element	no_transcription	no_transcription	.	.	.	.	.	.	.	.	2517935	2517815	2517933	2517813	False	False	False	False	False	False	False	False	False	False	False	False	False	True	False	False	False	False	False	False	False	False	False	False	False	False	False	False	False
chrI	2519027	2519178	chrI	2519025	2519176	putative_enhancer	transcription_initiation	no_transcription	.	.	.	.	.	.	.	.	2519135	2519042	2519133	2519040	True	False	False	False	False	False	False	False	False	False	False	False	False	False	False	False	False	False	False	False	False	False	False	False	False	False	False	False	False
chrI	2552937	2553088	chrI	2552935	2553086	coding_promoter	coding_promoter	transcription_initiation	WBGene00021272	Y23H5B.1	protein_coding	.	.	.	.	.	2553033	2552893	2553031	2552891	True	True	True	True	True	False	True	False	False	True	True	True	True	False	False	True	False	True	False	False	True	True	True	True	False	False	False	False	False
chrI	2565291	2565442	chrI	2565289	2565440	putative_enhancer	transcription_initiation	no_transcription	.	.	.	.	.	.	.	.	2565417	2565306	2565415	2565304	True	False	False	False	False	False	False	False	False	False	False	False	False	False	False	False	False	False	False	False	False	False	False	False	False	False	False	False	False
chrI	2571143	2571294	chrI	2571141	2571292	other_element	no_transcription	no_transcription	.	.	.	.	.	.	.	.	2571278	2571158	2571276	2571156	False	False	False	False	False	False	False	False	False	False	False	False	False	False	False	False	False	False	False	False	False	False	False	False	False	False	False	False	False
chrI	2571453	2571604	chrI	2571451	2571602	other_element	no_transcription	no_transcription	.	.	.	.	.	.	.	.	2571588	2571468	2571586	2571466	False	False	False	False	False	False	False	False	False	False	False	False	False	False	False	False	False	False	False	False	False	False	False	False	False	False	False	False	False
chrI	2574060	2574211	chrI	2574058	2574209	putative_enhancer	no_transcription	transcription_initiation	.	.	.	.	.	.	WBGene00000006	aat-5	2574195	2574097	2574193	2574095	False	True	False	False	False	False	False	False	False	False	False	False	False	False	False	False	False	False	False	False	False	False	False	False	False	False	False	False	False
chrI	2577197	2577348	chrI	2577195	2577346	putative_enhancer	transcription_initiation	transcription_initiation	.	.	.	.	.	.	WBGene00000006	aat-5	2577211	2577231	2577209	2577229	True	True	False	False	False	False	False	False	False	False	False	False	False	False	False	False	False	False	False	False	False	False	False	False	False	False	False	False	False
chrI	2577429	2577580	chrI	2577427	2577578	coding_promoter	unassigned_promoter	coding_promoter	.	.	.	WBGene00000006	aat-5	protein_coding	.	.	2577568	2577414	2577566	2577412	True	True	False	False	False	False	False	False	False	False	True	False	False	False	False	True	False	False	False	False	False	True	False	False	False	False	False	True	False
chrI	2580167	2580318	chrI	2580165	2580316	coding_promoter	unassigned_promoter	coding_promoter	.	.	.	WBGene00000006	aat-5	protein_coding	.	.	2580322	2580166	2580320	2580164	True	True	False	False	True	False	False	False	False	False	False	False	False	False	False	False	False	False	False	False	False	False	False	True	False	True	True	True	True
chrI	2584092	2584243	chrI	2584090	2584241	putative_enhancer	no_transcription	transcription_initiation	.	.	.	.	.	.	WBGene00001404	fbp-1	2584227	2584146	2584225	2584144	False	True	False	False	False	False	False	False	False	False	False	False	False	False	False	False	False	False	False	False	False	False	False	False	False	False	False	False	False
chrI	2585952	2586103	chrI	2585950	2586101	putative_enhancer	transcription_initiation	transcription_initiation	.	.	.	.	.	.	WBGene00001404	fbp-1	2586028	2586107	2586026	2586105	True	True	False	False	False	False	False	False	False	False	False	False	False	False	False	False	False	False	False	False	False	False	False	False	False	False	False	False	False
chrI	2586260	2586411	chrI	2586258	2586409	coding_promoter	unassigned_promoter	coding_promoter	.	.	.	WBGene00001404	fbp-1	protein_coding	.	.	2586380	2586276	2586378	2586274	True	True	False	False	True	False	False	False	False	False	False	False	False	False	False	False	True	True	True	False	False	False	False	False	True	True	True	False	True
chrI	2586856	2587007	chrI	2586854	2587005	other_element	no_transcription	no_transcription	.	.	.	.	.	.	WBGene00001404	fbp-1	2586991	2586871	2586989	2586869	False	False	False	False	False	False	False	False	False	False	False	False	False	True	False	False	False	False	False	False	False	False	False	False	False	False	False	False	False
chrI	2587105	2587256	chrI	2587103	2587254	unassigned_promoter	unassigned_promoter	no_transcription	.	.	.	.	.	.	WBGene00001404	fbp-1	2587116	2587120	2587114	2587118	True	False	True	False	False	False	False	False	False	False	False	False	False	True	True	False	False	False	False	False	False	False	False	False	False	False	False	False	False
chrI	2587351	2587502	chrI	2587349	2587500	coding_promoter	transcription_initiation	coding_promoter	.	.	.	WBGene00001404	fbp-1	protein_coding	.	.	2587473	2587340	2587471	2587338	True	True	False	False	False	False	False	False	False	False	False	False	False	False	False	False	False	False	False	False	False	False	False	False	True	False	False	True	True
chrI	2587650	2587801	chrI	2587648	2587799	putative_enhancer	transcription_initiation	transcription_initiation	.	.	.	.	.	.	WBGene00004226	ptr-12	2587709	2587743	2587707	2587741	True	True	False	False	False	False	False	False	False	False	False	False	False	False	False	False	False	False	False	True	False	False	False	False	False	False	False	False	False
chrI	2589121	2589272	chrI	2589119	2589270	putative_enhancer	transcription_initiation	transcription_initiation	.	.	.	.	.	.	WBGene00004226	ptr-12	2589217	2589151	2589215	2589149	True	True	False	False	False	False	False	False	False	False	False	False	False	False	False	False	False	False	False	False	False	False	False	False	True	False	False	False	False
chrI	2591554	2591705	chrI	2591552	2591703	unassigned_promoter	unassigned_promoter	transcription_initiation	.	.	.	.	.	.	WBGene00004226	ptr-12	2591729	2591572	2591727	2591570	True	True	False	False	True	False	False	False	False	False	False	False	False	False	False	False	False	False	True	False	False	False	False	True	False	False	False	False	False
chrI	2594346	2594497	chrI	2594344	2594495	putative_enhancer	transcription_initiation	transcription_initiation	.	.	.	.	.	.	WBGene00004226	ptr-12	2594479	2594437	2594477	2594435	True	True	False	False	False	False	False	False	False	False	False	False	False	False	False	False	False	False	False	False	False	False	False	False	False	False	False	False	False
chrI	2595465	2595616	chrI	2595463	2595614	coding_promoter	transcription_initiation	coding_promoter	.	.	.	WBGene00004226	ptr-12	protein_coding	.	.	2595564	2595480	2595562	2595478	True	False	False	False	False	False	False	False	False	False	False	False	False	False	False	False	False	False	False	False	False	False	False	False	False	False	False	False	False
chrI	2596502	2596653	chrI	2596500	2596651	other_element	no_transcription	no_transcription	.	.	.	.	.	.	.	.	2596637	2596517	2596635	2596515	False	False	False	False	False	False	False	False	False	False	False	False	False	False	False	False	False	False	False	False	False	False	True	False	False	False	False	False	False
chrI	2597483	2597634	chrI	2597481	2597632	putative_enhancer	transcription_initiation	no_transcription	.	.	.	.	.	.	.	.	2597489	2597498	2597487	2597496	True	False	False	False	False	False	False	False	False	False	False	False	False	False	False	False	False	False	False	False	False	False	False	False	False	False	False	False	False
chrI	2598526	2598677	chrI	2598524	2598675	coding_promoter	coding_promoter	unassigned_promoter	WBGene00019461	K07A3.3	protein_coding	.	.	.	.	.	2598704	2598547	2598702	2598545	True	True	False	False	True	False	False	False	False	False	False	False	False	False	False	False	True	False	False	False	False	False	False	False	False	True	True	False	False
chrI	2598841	2598992	chrI	2598839	2598990	putative_enhancer	transcription_initiation	no_transcription	.	.	.	.	.	.	WBGene00019461	K07A3.3	2598808	2598856	2598806	2598854	True	False	False	False	False	False	False	False	False	False	False	False	False	False	False	False	False	False	False	False	False	False	False	False	False	False	False	False	False
chrI	2601713	2601864	chrI	2601711	2601862	putative_enhancer	transcription_initiation	transcription_initiation	.	.	.	.	.	.	WBGene00019461	K07A3.3	2601866	2601749	2601864	2601747	True	True	False	False	False	False	False	False	False	False	False	False	False	False	False	False	False	False	False	False	False	False	False	False	False	False	False	False	False
chrI	2603724	2603875	chrI	2603722	2603873	coding_promoter	coding_promoter	transcription_initiation	WBGene00000832	ctn-1	protein_coding	.	.	.	.	.	2603890	2603712	2603888	2603710	True	True	True	True	True	False	False	False	False	False	False	False	False	True	True	True	True	True	True	False	False	False	False	True	False	False	False	False	False
chrI	2605395	2605546	chrI	2605393	2605544	coding_promoter	coding_promoter	transcription_initiation	WBGene00000832	ctn-1	protein_coding	.	.	.	.	.	2605577	2605358	2605575	2605356	True	True	False	False	True	False	False	False	False	False	False	False	False	False	False	False	False	False	False	False	False	True	False	False	False	False	False	False	False
chrI	2608599	2608750	chrI	2608597	2608748	other_element	no_transcription	no_transcription	.	.	.	.	.	.	WBGene00000832	ctn-1	2608734	2608614	2608732	2608612	False	False	True	False	False	True	False	False	True	False	True	True	True	False	False	False	False	False	False	False	False	False	False	False	False	False	False	False	False
chrI	2620403	2620554	chrI	2620401	2620552	coding_promoter	coding_promoter	transcription_initiation	WBGene00021270	Y23H5A.3	protein_coding	.	.	.	.	.	2620554	2620478	2620552	2620476	True	True	True	True	True	True	True	True	False	False	False	False	True	False	False	False	False	False	False	False	True	False	False	True	False	False	False	False	False
chrI	2622948	2623099	chrI	2622946	2623097	putative_enhancer	transcription_initiation	transcription_initiation	.	.	.	.	.	.	WBGene00021269	Y23H5A.2	2623036	2622966	2623034	2622964	True	True	False	False	False	False	False	False	False	False	False	False	False	False	False	False	False	False	False	False	False	False	False	False	False	False	False	False	False
chrI	2628239	2628390	chrI	2628237	2628388	coding_promoter	transcription_initiation	coding_promoter	.	.	.	WBGene00000800	cars-1	protein_coding	.	.	2628387	2628264	2628385	2628262	True	True	False	False	False	False	False	False	False	False	False	False	False	False	False	False	False	False	False	False	False	False	False	False	True	False	False	True	True
chrI	2628633	2628784	chrI	2628631	2628782	unassigned_promoter	unassigned_promoter	transcription_initiation	.	.	.	.	.	.	WBGene00000800	cars-1	2628819	2628743	2628817	2628741	True	True	False	False	False	False	False	False	False	False	False	False	True	False	False	False	False	False	False	False	True	False	False	True	False	False	False	False	False
chrI	2628796	2628947	chrI	2628794	2628945	unassigned_promoter	unassigned_promoter	transcription_initiation	.	.	.	.	.	.	WBGene00000800	cars-1	2628819	2628840	2628817	2628838	True	True	False	False	False	False	False	True	False	False	False	False	False	False	False	False	False	False	True	False	False	False	False	False	False	False	False	False	False
chrI	2629175	2629326	chrI	2629173	2629324	putative_enhancer	transcription_initiation	transcription_initiation	.	.	.	.	.	.	WBGene00000800	cars-1	2629315	2629150	2629313	2629148	True	True	False	False	False	False	False	False	False	False	False	False	False	False	False	False	False	False	False	False	False	False	False	False	False	False	False	False	False
chrI	2629367	2629518	chrI	2629365	2629516	coding_promoter	pseudogene_promoter	coding_promoter	WBGene00000801	cars-2	pseudogene	WBGene00000800	cars-1	protein_coding	.	.	2629500	2629382	2629498	2629380	True	False	True	True	True	True	True	True	False	False	False	False	False	False	False	False	False	False	False	False	False	True	False	False	True	True	True	True	True
chrI	2632611	2632762	chrI	2632609	2632760	coding_promoter	coding_promoter	transcription_initiation	WBGene00023172	Y23H5A.8	protein_coding	.	.	.	.	.	2632746	2632794	2632744	2632792	False	True	False	False	False	False	False	False	False	False	False	False	False	False	False	False	False	False	False	False	False	False	False	False	False	False	False	False	False
chrI	2634635	2634786	chrI	2634633	2634784	putative_enhancer	transcription_initiation	transcription_initiation	.	.	.	.	.	.	.	.	2634740	2634684	2634738	2634682	True	True	False	False	False	False	False	False	False	False	False	False	False	False	False	False	False	False	False	False	False	False	False	False	False	False	False	False	False
chrI	2634931	2635082	chrI	2634929	2635080	putative_enhancer	no_transcription	transcription_initiation	.	.	.	.	.	.	.	.	2635066	2634986	2635064	2634984	False	True	False	False	False	False	False	False	False	False	False	False	False	False	False	False	False	False	False	False	False	False	False	False	False	False	False	False	False
chrI	2636133	2636284	chrI	2636131	2636282	other_element	no_transcription	no_transcription	.	.	.	.	.	.	.	.	2636268	2636148	2636266	2636146	False	False	False	False	False	False	False	False	False	False	False	False	False	False	False	False	False	False	False	False	False	False	False	False	False	False	False	False	False
chrI	2636415	2636566	chrI	2636413	2636564	pseudogene_promoter	pseudogene_promoter	no_transcription	WBGene00077781	F40E3.7	pseudogene	.	.	.	.	.	2636550	2636430	2636548	2636428	False	False	False	False	False	False	False	False	False	False	False	False	False	False	False	False	False	False	False	False	False	False	False	False	False	False	False	False	False
chrI	2639743	2639894	chrI	2639741	2639892	putative_enhancer	transcription_initiation	transcription_initiation	.	.	.	.	.	.	.	.	2639782	2639816	2639780	2639814	True	True	False	False	False	False	False	False	False	False	False	False	False	False	True	False	False	False	False	False	False	False	False	False	False	False	False	False	False
chrI	2642414	2642565	chrI	2642412	2642563	coding_promoter	coding_promoter	no_transcription	WBGene00018230	mage-1	protein_coding	.	.	.	.	.	2642511	2642429	2642509	2642427	True	False	True	True	True	True	True	True	True	True	True	True	True	True	True	True	True	True	True	True	True	True	True	True	True	True	True	True	True
chrI	2648390	2648541	chrI	2648388	2648539	putative_enhancer	no_transcription	transcription_initiation	.	.	.	.	.	.	WBGene00018232	F40E3.5	2648525	2648411	2648523	2648409	False	True	False	False	True	False	False	False	False	False	False	False	False	False	True	True	True	True	False	False	False	True	True	False	False	False	False	False	False
chrI	2648918	2649069	chrI	2648916	2649067	putative_enhancer	transcription_initiation	transcription_initiation	.	.	.	.	.	.	WBGene00018232	F40E3.5	2649092	2648876	2649090	2648874	True	True	False	False	False	False	False	False	False	False	False	False	False	False	False	False	False	False	False	False	False	False	False	False	False	False	False	False	False
chrI	2653302	2653453	chrI	2653300	2653451	other_element	no_transcription	no_transcription	.	.	.	.	.	.	WBGene00018232	F40E3.5	2653437	2653317	2653435	2653315	False	False	False	False	False	False	False	False	False	False	False	False	False	False	False	False	False	False	False	False	False	False	False	True	False	False	False	False	False
chrI	2654532	2654683	chrI	2654530	2654681	unassigned_promoter	unassigned_promoter	transcription_initiation	.	.	.	.	.	.	WBGene00018232	F40E3.5	2654709	2654631	2654707	2654629	True	True	False	False	False	False	True	False	False	False	False	False	False	False	False	False	False	True	False	False	False	False	False	False	False	False	False	False	False
chrI	2655801	2655952	chrI	2655799	2655950	putative_enhancer	transcription_initiation	transcription_initiation	.	.	.	.	.	.	WBGene00018232	F40E3.5	2655877	2655797	2655875	2655795	True	True	False	False	False	False	False	False	False	False	False	False	False	False	False	False	False	False	False	False	False	False	False	False	False	False	False	False	False
chrI	2655998	2656149	chrI	2655996	2656147	putative_enhancer	transcription_initiation	transcription_initiation	.	.	.	.	.	.	WBGene00018232	F40E3.5	2655952	2655992	2655950	2655990	True	True	False	False	False	False	False	False	False	False	False	False	False	False	False	False	False	False	False	False	False	False	False	False	False	False	False	False	False
chrI	2657121	2657272	chrI	2657119	2657270	coding_promoter	coding_promoter	coding_promoter	WBGene00017979	F32B5.6	protein_coding	WBGene00018232	F40E3.5	protein_coding	.	.	2657121	2657235	2657119	2657233	True	True	False	False	True	True	True	True	False	False	True	True	True	False	False	False	False	False	True	False	False	False	True	False	False	True	True	True	True
chrI	2658650	2658801	chrI	2658648	2658799	putative_enhancer	transcription_initiation	no_transcription	.	.	.	.	.	.	WBGene00017979	F32B5.6	2658608	2658665	2658606	2658663	True	False	False	False	False	False	False	False	False	False	False	False	False	False	False	False	False	False	False	False	False	False	False	False	False	False	False	False	False
chrI	2659322	2659473	chrI	2659320	2659471	other_element	no_transcription	no_transcription	.	.	.	.	.	.	WBGene00017979	F32B5.6	2659457	2659337	2659455	2659335	False	False	False	False	False	False	False	False	False	False	False	False	False	False	False	False	False	False	False	False	False	False	False	False	False	False	False	False	False
chrI	2659632	2659783	chrI	2659630	2659781	unassigned_promoter	unassigned_promoter	transcription_initiation	.	.	.	.	.	.	WBGene00017979	F32B5.6	2659725	2659708	2659723	2659706	True	True	False	False	False	False	False	True	False	False	False	False	False	False	False	False	False	False	False	False	False	False	False	False	False	False	False	False	False
chrI	2659898	2660049	chrI	2659896	2660047	putative_enhancer	transcription_initiation	transcription_initiation	.	.	.	.	.	.	WBGene00017979	F32B5.6	2659926	2660085	2659924	2660083	True	True	False	False	False	False	False	False	False	False	False	False	False	False	False	False	False	False	False	False	False	False	False	False	False	False	False	False	False
chrI	2660030	2660181	chrI	2660028	2660179	putative_enhancer	transcription_initiation	transcription_initiation	.	.	.	.	.	.	WBGene00017979	F32B5.6	2660032	2660085	2660030	2660083	True	True	False	False	False	False	False	False	False	False	False	False	False	False	False	False	False	False	False	False	False	False	False	False	False	False	False	False	False
chrI	2661319	2661470	chrI	2661317	2661468	other_element	no_transcription	no_transcription	.	.	.	.	.	.	WBGene00017979	F32B5.6	2661454	2661334	2661452	2661332	False	False	False	False	False	False	False	False	False	False	False	False	False	False	False	False	False	False	False	False	False	False	False	False	False	False	False	False	False
chrI	2662590	2662741	chrI	2662588	2662739	putative_enhancer	transcription_initiation	transcription_initiation	.	.	.	.	.	.	WBGene00017979	F32B5.6	2662699	2662594	2662697	2662592	True	True	False	False	False	False	False	False	False	False	False	False	False	False	False	False	False	False	False	False	False	False	False	False	False	False	False	False	False
chrI	2663267	2663418	chrI	2663265	2663416	other_element	no_transcription	no_transcription	.	.	.	.	.	.	WBGene00017979	F32B5.6	2663402	2663282	2663400	2663280	False	False	False	False	False	False	False	False	False	False	False	False	False	False	False	False	False	False	False	False	False	False	False	False	False	False	False	False	False
chrI	2663692	2663843	chrI	2663690	2663841	other_element	no_transcription	no_transcription	.	.	.	.	.	.	WBGene00017979	F32B5.6	2663827	2663707	2663825	2663705	False	False	False	False	False	False	False	False	False	False	False	False	False	False	False	False	False	False	False	False	False	False	False	False	False	False	False	False	False
chrI	2664172	2664323	chrI	2664170	2664321	unassigned_promoter	no_transcription	unassigned_promoter	.	.	.	.	.	.	WBGene00017979	F32B5.6	2664307	2664195	2664305	2664193	False	True	False	False	False	False	False	False	False	False	False	False	False	False	False	False	False	False	False	False	False	False	False	False	False	False	False	False	False
chrI	2664977	2665128	chrI	2664975	2665126	putative_enhancer	transcription_initiation	transcription_initiation	.	.	.	.	.	.	WBGene00017979	F32B5.6	2665110	2665136	2665108	2665134	True	True	False	False	False	False	False	False	False	False	False	False	False	False	False	False	False	False	False	False	True	False	False	False	False	False	False	False	False
chrI	2665323	2665474	chrI	2665321	2665472	putative_enhancer	transcription_initiation	transcription_initiation	.	.	.	.	.	.	WBGene00017979	F32B5.6	2665442	2665332	2665440	2665330	True	True	False	False	False	False	False	False	False	False	False	False	False	False	False	False	False	False	False	False	False	False	False	False	False	False	False	False	False
chrI	2665892	2666043	chrI	2665890	2666041	putative_enhancer	no_transcription	transcription_initiation	.	.	.	.	.	.	WBGene00017979	F32B5.6	2666027	2665871	2666025	2665869	False	True	False	False	False	False	False	False	False	False	False	False	True	False	False	False	False	False	False	False	False	False	False	False	False	False	False	False	False
chrI	2666718	2666869	chrI	2666716	2666867	coding_promoter	coding_promoter	transcription_initiation	WBGene00017979	F32B5.6	protein_coding	.	.	.	.	.	2666776	2666700	2666774	2666698	True	True	False	False	False	False	False	False	False	False	False	False	False	False	False	False	False	False	False	True	False	False	False	False	False	False	False	False	False
chrI	2667914	2668065	chrI	2667912	2668063	coding_promoter	coding_promoter	unassigned_promoter	WBGene00017979	F32B5.6	protein_coding	.	.	.	.	.	2668041	2667913	2668039	2667911	True	True	True	True	True	True	True	True	True	True	True	True	True	False	False	False	False	False	False	False	False	False	False	False	False	False	False	True	True
chrI	2668264	2668415	chrI	2668262	2668413	putative_enhancer	transcription_initiation	transcription_initiation	.	.	.	.	.	.	WBGene00017979	F32B5.6	2668406	2668295	2668404	2668293	True	True	False	False	False	False	False	False	False	False	False	False	False	False	False	False	False	False	False	False	False	False	False	False	False	False	False	False	False
chrI	2668692	2668843	chrI	2668690	2668841	coding_promoter	coding_promoter	transcription_initiation	WBGene00017979	F32B5.6	protein_coding	.	.	.	.	.	2668775	2668670	2668773	2668668	True	True	True	False	False	True	False	True	True	True	True	True	True	False	False	False	False	False	False	False	False	False	False	False	False	False	False	False	False
chrI	2669305	2669456	chrI	2669303	2669454	other_element	no_transcription	no_transcription	.	.	.	.	.	.	WBGene00017979	F32B5.6	2669440	2669320	2669438	2669318	False	False	False	False	False	False	False	False	False	False	False	False	False	False	False	False	False	False	False	False	False	False	False	False	False	False	False	False	False
chrI	2669742	2669893	chrI	2669740	2669891	other_element	no_transcription	no_transcription	.	.	.	.	.	.	WBGene00017979	F32B5.6	2669877	2669757	2669875	2669755	False	False	False	False	False	False	False	False	False	False	False	False	False	False	False	False	False	False	False	False	False	False	False	False	False	False	False	False	False
chrI	2670568	2670719	chrI	2670566	2670717	putative_enhancer	transcription_initiation	transcription_initiation	.	.	.	.	.	.	WBGene00017979	F32B5.6	2670766	2670567	2670764	2670565	True	True	False	False	False	False	False	False	False	False	False	False	False	False	False	False	False	False	False	False	False	False	False	False	False	False	False	False	False
chrI	2672067	2672218	chrI	2672065	2672216	putative_enhancer	transcription_initiation	transcription_initiation	.	.	.	.	.	.	WBGene00017979	F32B5.6	2672207	2672022	2672205	2672020	True	True	False	False	False	False	False	False	False	False	False	False	False	False	False	False	False	False	False	False	False	False	False	False	False	False	False	False	False
chrI	2673038	2673189	chrI	2673036	2673187	other_element	no_transcription	no_transcription	.	.	.	.	.	.	WBGene00017980	F32B5.7	2673173	2673053	2673171	2673051	False	False	False	False	False	False	False	False	False	False	False	False	False	False	False	False	False	False	False	False	False	False	False	False	False	False	False	False	False
chrI	2678152	2678303	chrI	2678150	2678301	putative_enhancer	transcription_initiation	transcription_initiation	.	.	.	.	.	.	WBGene00017980	F32B5.7	2678350	2678117	2678348	2678115	True	True	False	False	False	False	False	False	False	False	False	False	False	False	False	False	False	False	False	False	False	False	False	False	False	False	False	False	False
chrI	2679544	2679695	chrI	2679542	2679693	unassigned_promoter	unassigned_promoter	transcription_initiation	.	.	.	.	.	.	WBGene00017980	F32B5.7	2679710	2679552	2679708	2679550	True	True	False	True	True	False	False	False	False	False	False	False	False	False	False	True	False	False	False	False	False	False	False	False	False	False	False	False	False
chrI	2680782	2680933	chrI	2680780	2680931	putative_enhancer	transcription_initiation	transcription_initiation	.	.	.	.	.	.	WBGene00017980	F32B5.7	2680887	2680781	2680885	2680779	True	True	False	False	False	False	False	False	False	False	False	False	False	False	False	False	False	False	False	False	False	False	False	False	False	False	False	False	False
chrI	2681502	2681653	chrI	2681500	2681651	putative_enhancer	transcription_initiation	transcription_initiation	.	.	.	.	.	.	WBGene00017980	F32B5.7	2681639	2681499	2681637	2681497	True	True	False	False	False	False	False	False	False	False	False	False	False	False	False	False	False	False	False	False	False	False	False	False	False	False	False	False	False
chrI	2682533	2682684	chrI	2682531	2682682	putative_enhancer	transcription_initiation	no_transcription	.	.	.	.	.	.	WBGene00017980	F32B5.7	2682689	2682548	2682687	2682546	True	False	False	False	False	False	False	False	False	False	False	False	False	True	False	False	False	False	False	False	False	False	False	False	False	False	False	False	False
chrI	2682978	2683129	chrI	2682976	2683127	coding_promoter	transcription_initiation	coding_promoter	.	.	.	WBGene00017980	F32B5.7	protein_coding	.	.	2683119	2682957	2683117	2682955	True	True	False	False	False	False	False	False	False	False	False	False	False	False	False	False	False	False	False	False	False	False	False	True	True	True	True	True	True
chrI	2684496	2684647	chrI	2684494	2684645	other_element	no_transcription	no_transcription	.	.	.	.	.	.	.	.	2684631	2684511	2684629	2684509	False	False	False	False	False	False	False	False	False	False	False	False	False	False	False	False	False	False	False	False	False	False	False	False	False	False	False	False	False
chrI	2684843	2684994	chrI	2684841	2684992	putative_enhancer	transcription_initiation	no_transcription	.	.	.	.	.	.	.	.	2684931	2684858	2684929	2684856	True	False	False	False	False	False	False	False	False	False	False	False	False	False	False	False	False	False	False	False	False	False	False	False	False	False	False	False	False
chrI	2686459	2686610	chrI	2686457	2686608	unassigned_promoter	unassigned_promoter	transcription_initiation	.	.	.	.	.	.	.	.	2686576	2686493	2686574	2686491	True	True	False	False	False	False	True	True	True	True	True	True	True	True	False	False	False	True	True	True	True	True	True	True	False	False	False	False	False
chrI	2686861	2687012	chrI	2686859	2687010	putative_enhancer	transcription_initiation	transcription_initiation	.	.	.	.	.	.	WBGene00000788	cpz-1	2686830	2686840	2686828	2686838	True	True	False	False	False	False	False	False	False	False	False	False	False	False	False	False	False	False	False	False	False	False	False	False	False	False	False	False	False
chrI	2687299	2687450	chrI	2687297	2687448	other_element	no_transcription	no_transcription	.	.	.	.	.	.	WBGene00000788	cpz-1	2687434	2687314	2687432	2687312	False	False	False	False	False	False	False	False	False	False	False	False	False	False	False	False	False	False	False	False	False	False	False	False	False	False	False	False	False
chrI	2687696	2687847	chrI	2687694	2687845	putative_enhancer	transcription_initiation	transcription_initiation	.	.	.	.	.	.	WBGene00000788	cpz-1	2687713	2687726	2687711	2687724	True	True	False	False	False	False	False	False	False	False	False	False	False	False	False	False	False	False	False	False	False	False	False	False	False	False	False	False	False
chrI	2688108	2688259	chrI	2688106	2688257	coding_promoter	no_transcription	coding_promoter	.	.	.	WBGene00000788	cpz-1	protein_coding	.	.	2688243	2688188	2688241	2688186	False	True	False	False	False	False	False	False	False	False	False	False	False	False	False	False	False	False	False	False	False	False	True	False	False	False	False	False	False
chrI	2688869	2689020	chrI	2688867	2689018	non-coding_RNA	non-coding_RNA	no_transcription	WBGene00044927	F32B5.9	snRNA	.	.	.	.	.	2689030	2688884	2689028	2688882	True	False	False	False	True	False	False	False	False	False	False	True	True	True	True	True	False	True	True	True	False	False	True	True	False	False	False	False	False
chrI	2689408	2689559	chrI	2689406	2689557	coding_promoter	unassigned_promoter	coding_promoter	.	.	.	WBGene00000788	cpz-1	protein_coding	.	.	2689548	2689444	2689546	2689442	True	True	False	False	False	False	False	False	False	True	False	False	False	False	False	False	False	False	False	False	True	False	False	False	True	True	True	True	True
chrI	2690171	2690322	chrI	2690169	2690320	putative_enhancer	transcription_initiation	no_transcription	.	.	.	.	.	.	WBGene00017978	msrp-1	2690291	2690186	2690289	2690184	True	False	False	False	False	False	False	False	False	False	False	False	False	False	False	False	False	False	False	False	False	False	False	False	False	False	False	False	False
chrI	2690432	2690583	chrI	2690430	2690581	unassigned_promoter	transcription_initiation	unassigned_promoter	.	.	.	.	.	.	WBGene00017978	msrp-1	2690619	2690432	2690617	2690430	True	True	False	False	False	False	False	False	False	False	False	False	False	False	False	True	False	True	False	False	False	False	False	False	False	False	False	True	False
chrI	2697139	2697290	chrI	2697137	2697288	coding_promoter	coding_promoter	no_transcription	WBGene00017976	F32B5.2	protein_coding	.	.	.	.	.	2697276	2697154	2697274	2697152	True	False	True	False	True	True	True	False	False	False	False	False	False	False	False	False	True	True	False	False	False	False	True	True	False	False	False	False	False
chrI	2703291	2703442	chrI	2703289	2703440	coding_promoter	coding_promoter	transcription_initiation	WBGene00003006	lin-17	protein_coding	.	.	.	.	.	2703463	2703287	2703461	2703285	True	True	True	True	True	True	True	False	False	False	False	False	False	True	True	True	True	True	False	False	False	False	False	False	False	False	False	False	False
chrI	2704476	2704627	chrI	2704474	2704625	putative_enhancer	transcription_initiation	no_transcription	.	.	.	.	.	.	WBGene00003006	lin-17	2704561	2704491	2704559	2704489	True	False	False	False	False	False	False	False	False	False	False	False	False	False	False	False	False	False	False	True	False	False	True	False	False	False	False	False	False
chrI	2705762	2705913	chrI	2705760	2705911	other_element	no_transcription	no_transcription	.	.	.	.	.	.	WBGene00003006	lin-17	2705897	2705777	2705895	2705775	False	False	False	False	False	False	False	False	False	False	False	False	False	False	False	False	False	False	False	False	False	False	False	False	False	False	False	False	False
chrI	2706138	2706289	chrI	2706136	2706287	coding_promoter	coding_promoter	transcription_initiation	WBGene00003006	lin-17	protein_coding	.	.	.	.	.	2706324	2706168	2706322	2706166	True	True	False	False	False	False	False	False	True	False	False	False	False	False	False	False	False	False	False	True	False	False	False	True	False	False	False	False	False
chrI	2707211	2707362	chrI	2707209	2707360	putative_enhancer	transcription_initiation	transcription_initiation	.	.	.	.	.	.	WBGene00003006	lin-17	2707334	2707203	2707332	2707201	True	True	False	False	False	False	False	False	False	False	False	False	False	False	False	False	False	False	False	False	False	False	False	False	False	False	False	False	False
chrI	2708326	2708477	chrI	2708324	2708475	putative_enhancer	transcription_initiation	transcription_initiation	.	.	.	.	.	.	WBGene00003006	lin-17	2708469	2708351	2708467	2708349	True	True	False	False	False	False	False	False	False	False	False	False	False	False	False	False	False	False	False	False	False	False	False	False	False	False	False	False	False
chrI	2709607	2709758	chrI	2709605	2709756	putative_enhancer	transcription_initiation	transcription_initiation	.	.	.	.	.	.	WBGene00003006	lin-17	2709784	2709725	2709782	2709723	True	True	False	False	False	False	False	False	False	False	False	False	False	False	False	False	False	False	False	False	False	False	False	False	False	False	False	False	False
chrI	2710926	2711077	chrI	2710924	2711075	putative_enhancer	transcription_initiation	no_transcription	.	.	.	.	.	.	WBGene00003006	lin-17	2711115	2710941	2711113	2710939	True	False	False	False	False	False	False	False	False	True	False	False	False	False	False	False	False	False	False	False	False	False	False	False	False	False	False	False	False
chrI	2711280	2711431	chrI	2711278	2711429	putative_enhancer	transcription_initiation	no_transcription	.	.	.	.	.	.	WBGene00003006	lin-17	2711357	2711295	2711355	2711293	True	False	False	False	False	False	False	False	False	False	False	False	False	False	False	False	False	False	False	False	False	False	False	False	False	False	False	False	False
chrI	2722881	2723032	chrI	2722879	2723030	other_element	no_transcription	no_transcription	.	.	.	.	.	.	WBGene00022128	Y71F9B.6	2723016	2722896	2723014	2722894	False	False	False	False	False	False	False	False	False	False	False	False	False	True	False	False	False	False	False	False	False	False	False	False	True	True	True	True	True
chrI	2723200	2723351	chrI	2723198	2723349	other_element	no_transcription	no_transcription	.	.	.	.	.	.	WBGene00022128	Y71F9B.6	2723335	2723215	2723333	2723213	False	False	False	False	False	False	True	False	False	False	False	False	False	False	False	False	False	False	False	False	False	False	False	False	False	False	False	False	False
chrI	2723534	2723685	chrI	2723532	2723683	other_element	no_transcription	no_transcription	.	.	.	.	.	.	WBGene00022128	Y71F9B.6	2723669	2723549	2723667	2723547	False	False	False	False	False	False	False	False	False	False	False	False	False	False	False	False	False	False	False	False	False	False	False	False	False	False	False	False	False
chrI	2726291	2726442	chrI	2726289	2726440	other_element	no_transcription	no_transcription	.	.	.	.	.	.	WBGene00022128	Y71F9B.6	2726426	2726306	2726424	2726304	False	False	False	False	False	False	False	False	False	False	False	False	False	False	False	False	False	False	False	False	False	False	False	False	False	False	False	False	False
chrI	2726656	2726807	chrI	2726654	2726805	coding_promoter	coding_promoter	coding_promoter	WBGene00004920	snr-7	protein_coding	WBGene00022128	Y71F9B.6	protein_coding	.	.	2726774	2726694	2726772	2726692	True	True	True	True	True	True	False	True	False	False	False	False	False	True	True	False	True	False	True	False	True	False	False	False	True	True	True	True	True
chrI	2727063	2727214	chrI	2727061	2727212	putative_enhancer	transcription_initiation	no_transcription	.	.	.	.	.	.	WBGene00004920,WBGene00022128	Y71F9B.6,snr-7	2727054	2727078	2727052	2727076	True	False	False	False	False	False	False	False	False	False	False	False	False	False	False	False	False	False	False	False	False	False	False	False	False	False	False	False	False
chrI	2727643	2727794	chrI	2727641	2727792	coding_promoter	transcription_initiation	coding_promoter	.	.	.	WBGene00022128	Y71F9B.6	protein_coding	.	.	2727712	2727674	2727710	2727672	True	True	False	False	False	False	False	False	False	False	False	False	False	False	False	False	False	False	False	False	False	False	False	False	False	True	False	False	False
chrI	2728779	2728930	chrI	2728777	2728928	coding_promoter	coding_promoter	transcription_initiation	WBGene00022127	yop-1	protein_coding	.	.	.	.	.	2728931	2728909	2728929	2728907	True	True	False	False	False	False	False	False	True	False	False	True	False	False	False	False	False	False	False	False	False	False	True	False	False	False	False	False	False
chrI	2738315	2738466	chrI	2738313	2738464	putative_enhancer	transcription_initiation	transcription_initiation	.	.	.	.	.	.	WBGene00022129	lron-11	2738404	2738346	2738402	2738344	True	True	False	False	False	False	False	False	False	False	False	False	False	False	False	False	False	False	False	False	False	False	False	False	False	False	False	False	False
chrI	2739474	2739625	chrI	2739472	2739623	putative_enhancer	transcription_initiation	transcription_initiation	.	.	.	.	.	.	WBGene00022129	lron-11	2739624	2739671	2739622	2739669	True	True	False	False	False	False	False	False	False	False	False	False	False	False	False	False	False	False	False	False	False	False	False	False	False	False	False	False	False
chrI	2740063	2740214	chrI	2740061	2740212	putative_enhancer	transcription_initiation	no_transcription	.	.	.	.	.	.	WBGene00022129	lron-11	2740082	2740078	2740080	2740076	True	False	False	False	False	False	False	False	False	False	False	False	False	False	False	False	False	False	False	False	False	False	False	False	False	False	False	False	False
chrI	2740945	2741096	chrI	2740943	2741094	putative_enhancer	transcription_initiation	transcription_initiation	.	.	.	.	.	.	WBGene00022129	lron-11	2741070	2741094	2741068	2741092	True	True	False	False	False	False	False	False	False	False	False	False	False	False	False	False	False	False	False	False	False	False	False	False	False	False	False	False	False
chrI	2741210	2741361	chrI	2741208	2741359	putative_enhancer	transcription_initiation	transcription_initiation	.	.	.	.	.	.	WBGene00022129	lron-11	2741399	2741210	2741397	2741208	True	True	False	False	False	False	False	False	False	False	False	False	False	False	False	False	False	False	False	False	False	False	False	False	False	False	False	False	False
chrI	2742314	2742465	chrI	2742312	2742463	putative_enhancer	transcription_initiation	transcription_initiation	.	.	.	.	.	.	WBGene00022129	lron-11	2742434	2742479	2742432	2742477	True	True	False	False	False	False	False	False	False	False	False	False	False	False	False	False	False	False	False	False	False	False	False	False	False	False	False	False	False
chrI	2742966	2743117	chrI	2742964	2743115	putative_enhancer	transcription_initiation	transcription_initiation	.	.	.	.	.	.	WBGene00022129	lron-11	2743105	2742992	2743103	2742990	True	True	False	False	False	False	False	False	False	False	False	False	False	False	False	False	False	False	False	False	False	False	False	False	False	False	False	False	False
chrI	2744956	2745107	chrI	2744954	2745105	putative_enhancer	transcription_initiation	no_transcription	.	.	.	.	.	.	WBGene00022129	lron-11	2745023	2744971	2745021	2744969	True	False	False	False	False	False	False	False	False	False	False	False	False	False	False	False	False	False	False	False	False	False	False	False	False	False	False	False	False
chrI	2745975	2746126	chrI	2745973	2746124	putative_enhancer	transcription_initiation	transcription_initiation	.	.	.	.	.	.	WBGene00022129	lron-11	2746112	2745990	2746110	2745988	True	True	False	False	False	False	False	False	False	False	False	False	False	False	False	False	False	False	False	False	False	False	False	False	False	False	False	False	False
chrI	2746631	2746782	chrI	2746629	2746780	other_element	no_transcription	no_transcription	.	.	.	.	.	.	WBGene00022129	lron-11	2746766	2746646	2746764	2746644	False	False	False	False	False	False	False	False	False	False	False	False	False	False	False	False	False	False	False	False	False	False	False	False	False	False	False	False	False
chrI	2746828	2746979	chrI	2746826	2746977	other_element	no_transcription	no_transcription	.	.	.	.	.	.	WBGene00022129	lron-11	2746963	2746843	2746961	2746841	False	False	False	False	False	False	False	False	False	False	False	False	False	False	False	False	False	False	False	False	False	False	False	False	False	False	False	False	False
chrI	2747652	2747803	chrI	2747650	2747801	putative_enhancer	transcription_initiation	transcription_initiation	.	.	.	.	.	.	WBGene00022129	lron-11	2747810	2747838	2747808	2747836	True	True	False	False	False	False	False	False	False	False	False	False	False	True	False	False	False	False	False	False	False	False	False	False	False	False	False	False	False
chrI	2747795	2747946	chrI	2747793	2747944	coding_promoter	transcription_initiation	coding_promoter	.	.	.	WBGene00022129	lron-11	protein_coding	.	.	2747889	2747838	2747887	2747836	True	True	False	False	False	False	False	False	False	False	False	False	False	True	True	False	False	False	False	False	False	False	False	False	False	False	False	False	False
chrI	2749182	2749333	chrI	2749180	2749331	putative_enhancer	no_transcription	transcription_initiation	.	.	.	.	.	.	.	.	2749317	2749195	2749315	2749193	False	True	False	False	False	False	False	False	False	False	False	False	False	False	False	False	False	False	False	False	False	False	False	False	False	False	False	False	False
chrI	2749464	2749615	chrI	2749462	2749613	putative_enhancer	transcription_initiation	transcription_initiation	.	.	.	.	.	.	.	.	2749602	2749474	2749600	2749472	True	True	False	False	False	False	False	False	False	False	False	False	False	False	False	False	False	False	False	False	False	False	False	False	False	False	False	False	False
chrI	2750849	2751000	chrI	2750847	2750998	putative_enhancer	transcription_initiation	transcription_initiation	.	.	.	.	.	.	.	.	2750972	2750904	2750970	2750902	True	True	False	False	False	False	False	False	False	False	False	False	False	False	False	False	False	False	False	False	False	False	False	False	False	False	False	False	False
chrI	2751117	2751268	chrI	2751115	2751266	putative_enhancer	transcription_initiation	transcription_initiation	.	.	.	.	.	.	.	.	2751241	2751119	2751239	2751117	True	True	False	False	False	False	False	False	False	False	False	False	False	False	False	False	False	False	False	False	False	False	False	False	False	False	False	False	False
chrI	2752179	2752330	chrI	2752177	2752328	putative_enhancer	transcription_initiation	transcription_initiation	.	.	.	.	.	.	.	.	2752323	2752261	2752321	2752259	True	True	False	False	False	False	False	False	False	False	False	False	False	False	False	False	False	False	False	False	False	False	False	False	False	False	False	False	False
chrI	2753044	2753195	chrI	2753042	2753193	putative_enhancer	transcription_initiation	transcription_initiation	.	.	.	.	.	.	.	.	2753171	2753063	2753169	2753061	True	True	False	False	False	False	False	False	False	False	False	False	False	False	False	False	False	False	False	False	False	False	False	False	False	False	False	False	False
chrI	2754167	2754318	chrI	2754165	2754316	putative_enhancer	transcription_initiation	transcription_initiation	.	.	.	.	.	.	.	.	2754182	2754130	2754180	2754128	True	True	False	False	False	False	False	False	False	False	False	False	False	False	False	False	False	False	False	False	False	False	False	False	False	False	False	False	False
chrI	2755207	2755358	chrI	2755205	2755356	putative_enhancer	transcription_initiation	transcription_initiation	.	.	.	.	.	.	.	.	2755343	2755212	2755341	2755210	True	True	False	False	False	False	False	False	False	False	False	False	False	False	True	False	False	False	False	False	False	False	False	False	False	False	False	False	False
chrI	2755506	2755657	chrI	2755504	2755655	putative_enhancer	transcription_initiation	no_transcription	.	.	.	.	.	.	WBGene00004043	plk-2	2755598	2755521	2755596	2755519	True	False	False	False	False	False	False	False	False	False	False	False	False	False	False	False	False	False	True	False	False	False	False	False	False	False	False	False	False
chrI	2758266	2758417	chrI	2758264	2758415	coding_promoter	transcription_initiation	coding_promoter	.	.	.	WBGene00004043	plk-2	protein_coding	.	.	2758364	2758220	2758362	2758218	True	True	False	False	False	False	False	False	False	False	False	False	False	False	False	False	False	False	False	False	False	False	False	False	True	True	True	True	True
chrI	2758665	2758816	chrI	2758663	2758814	coding_promoter	transcription_initiation	coding_promoter	.	.	.	WBGene00004043	plk-2	protein_coding	.	.	2758745	2758735	2758743	2758733	True	True	False	False	False	False	False	False	False	False	False	False	False	False	False	False	False	True	False	False	False	False	False	False	False	True	True	True	True
chrI	2761001	2761152	chrI	2760999	2761150	coding_promoter	transcription_initiation	coding_promoter	.	.	.	WBGene00022130	Y71F9B.9	protein_coding	.	.	2761139	2761016	2761137	2761014	True	True	False	False	False	False	False	False	False	False	False	False	False	False	False	False	False	False	False	True	False	False	False	False	True	True	False	False	False
chrI	2762188	2762339	chrI	2762186	2762337	putative_enhancer	transcription_initiation	no_transcription	.	.	.	.	.	.	WBGene00004946	sop-3	2762212	2762203	2762210	2762201	True	False	False	False	False	False	False	False	False	False	False	False	False	True	False	False	False	False	False	False	False	False	False	False	False	False	False	False	False
chrI	2773894	2774045	chrI	2773892	2774043	coding_promoter	coding_promoter	transcription_initiation	WBGene00022125	Y71F9B.1	protein_coding	.	.	.	.	.	2773971	2773894	2773969	2773892	True	True	False	False	False	False	False	False	False	False	False	False	False	False	False	False	False	False	False	False	True	False	False	True	False	False	False	False	False
chrI	2774998	2775149	chrI	2774996	2775147	putative_enhancer	transcription_initiation	no_transcription	.	.	.	.	.	.	WBGene00004946,WBGene00022125	Y71F9B.1,sop-3	2775151	2775013	2775149	2775011	True	False	False	False	False	False	False	False	False	False	False	False	False	False	False	False	False	False	False	False	False	False	False	False	False	False	False	False	False
chrI	2776204	2776355	chrI	2776202	2776353	coding_promoter	transcription_initiation	coding_promoter	.	.	.	WBGene00004946	sop-3	protein_coding	.	.	2776318	2776243	2776316	2776241	True	True	False	False	False	False	False	False	False	False	False	False	False	False	False	True	False	False	False	False	False	False	False	False	True	True	True	True	True
chrI	2777470	2777621	chrI	2777468	2777619	coding_promoter	no_transcription	coding_promoter	.	.	.	WBGene00022131	Y71F9B.13	protein_coding	.	.	2777605	2777452	2777603	2777450	False	True	False	False	False	False	False	False	False	False	False	False	False	False	False	False	False	False	False	False	False	False	False	True	True	False	False	True	True
chrI	2778151	2778302	chrI	2778149	2778300	putative_enhancer	transcription_initiation	transcription_initiation	.	.	.	.	.	.	WBGene00022131	Y71F9B.13	2778178	2778275	2778176	2778273	True	True	False	False	False	False	False	False	False	False	False	False	False	False	False	False	False	True	False	False	False	False	False	False	False	False	False	False	False
chrI	2778412	2778563	chrI	2778410	2778561	unassigned_promoter	unassigned_promoter	no_transcription	.	.	.	.	.	.	WBGene00022131	Y71F9B.13	2778436	2778427	2778434	2778425	True	False	False	False	False	False	False	False	False	False	False	False	True	False	True	False	False	False	True	False	False	False	False	True	False	False	False	False	False
chrI	2778782	2778933	chrI	2778780	2778931	coding_promoter	transcription_initiation	coding_promoter	.	.	.	WBGene00022131	Y71F9B.13	protein_coding	.	.	2778884	2778825	2778882	2778823	True	True	False	False	False	False	False	False	False	False	False	False	False	False	False	False	False	False	False	False	False	False	False	False	True	True	True	True	True
chrI	2780095	2780246	chrI	2780093	2780244	coding_promoter	transcription_initiation	coding_promoter	.	.	.	WBGene00022131	Y71F9B.13	protein_coding	.	.	2780213	2780116	2780211	2780114	True	True	False	False	False	False	False	False	False	False	False	False	False	False	False	False	False	False	False	False	False	False	False	False	False	False	False	False	False
chrI	2785983	2786134	chrI	2785981	2786132	coding_promoter	no_transcription	coding_promoter	.	.	.	WBGene00020990	W03D8.9	protein_coding	.	.	2786118	2786069	2786116	2786067	False	True	False	False	False	False	False	False	False	False	False	False	False	False	False	False	False	False	False	False	False	False	False	False	False	False	False	False	True
chrI	2791501	2791652	chrI	2791499	2791650	coding_promoter	coding_promoter	coding_promoter	WBGene00020989	W03D8.8	protein_coding	WBGene00020984	W03D8.1	protein_coding	.	.	2791615	2791515	2791613	2791513	True	True	False	True	True	True	True	False	True	True	True	False	False	False	True	True	True	True	False	True	True	True	False	False	False	False	False	False	False
chrI	2800856	2801007	chrI	2800854	2801005	coding_promoter	coding_promoter	coding_promoter	WBGene00002174	itx-1	protein_coding	WBGene00020985	W03D8.2	protein_coding	.	.	2800972	2800919	2800970	2800917	True	True	False	True	True	False	True	False	True	False	False	False	False	False	False	False	False	True	False	False	False	False	False	True	True	True	True	True	True
chrI	2801867	2802018	chrI	2801865	2802016	putative_enhancer	transcription_initiation	transcription_initiation	.	.	.	.	.	.	WBGene00002174	itx-1	2801988	2801876	2801986	2801874	True	True	False	False	False	False	False	False	False	False	False	False	False	False	False	False	False	False	False	False	False	False	False	False	False	False	False	False	False
chrI	2803632	2803783	chrI	2803630	2803781	putative_enhancer	transcription_initiation	transcription_initiation	.	.	.	.	.	.	WBGene00002174	itx-1	2803825	2803664	2803823	2803662	True	True	False	False	False	False	False	False	False	False	False	False	False	False	False	False	False	False	False	False	False	False	False	False	False	False	False	False	False
chrI	2818602	2818753	chrI	2818600	2818751	coding_promoter	coding_promoter	no_transcription	WBGene00044796	W03D8.11	protein_coding	.	.	.	.	.	2818776	2818617	2818774	2818615	True	False	True	False	False	True	True	False	False	False	False	False	False	True	False	False	True	True	False	False	True	False	False	False	False	False	False	False	False
chrI	2825829	2825980	chrI	2825827	2825978	other_element	no_transcription	no_transcription	.	.	.	.	.	.	WBGene00004077,WBGene00020986	W03D8.3,pop-1	2825964	2825844	2825962	2825842	False	False	False	False	False	False	False	False	False	False	False	False	False	False	False	False	False	False	False	False	False	False	True	False	False	False	False	False	False
chrI	2826981	2827132	chrI	2826979	2827130	non-coding_RNA	transcription_initiation	non-coding_RNA	.	.	.	WBGene00220126	W10C8.17	snoRNA	.	.	2827169	2826975	2827167	2826973	True	True	False	False	False	False	False	False	False	False	False	False	False	False	False	False	False	False	False	False	False	False	False	False	False	False	False	False	False
chrI	2827494	2827645	chrI	2827492	2827643	other_element	no_transcription	no_transcription	.	.	.	.	.	.	WBGene00004077	pop-1	2827629	2827509	2827627	2827507	False	False	False	False	False	False	False	False	False	False	False	False	False	False	False	False	False	False	False	False	False	False	False	False	False	False	False	False	False
chrI	2829186	2829337	chrI	2829184	2829335	putative_enhancer	transcription_initiation	transcription_initiation	.	.	.	.	.	.	WBGene00004077	pop-1	2829322	2829184	2829320	2829182	True	True	False	False	False	False	False	False	False	False	False	False	False	False	False	False	False	False	False	False	False	False	False	False	False	False	False	False	False
chrI	2830355	2830506	chrI	2830353	2830504	coding_promoter	no_transcription	coding_promoter	.	.	.	WBGene00004077	pop-1	protein_coding	.	.	2830490	2830370	2830488	2830368	False	False	False	False	False	False	False	False	False	False	False	False	False	False	False	False	False	False	False	False	False	False	False	False	True	True	True	True	True
chrI	2830805	2830956	chrI	2830803	2830954	other_element	no_transcription	no_transcription	.	.	.	.	.	.	WBGene00004077	pop-1	2830940	2830820	2830938	2830818	False	False	False	False	False	False	False	False	False	False	False	False	False	False	False	False	False	False	False	False	False	False	False	False	False	False	False	False	False
chrI	2831508	2831659	chrI	2831506	2831657	coding_promoter	unassigned_promoter	coding_promoter	.	.	.	WBGene00004077	pop-1	protein_coding	.	.	2831624	2831458	2831622	2831456	True	True	True	False	False	False	False	False	False	False	False	False	False	True	False	False	False	False	False	False	False	False	False	False	True	False	False	False	False
chrI	2831839	2831990	chrI	2831837	2831988	putative_enhancer	transcription_initiation	transcription_initiation	.	.	.	.	.	.	.	.	2831960	2831967	2831958	2831965	True	True	False	False	False	False	False	False	False	False	False	False	False	False	False	False	False	False	False	False	False	False	False	False	False	False	False	False	False
chrI	2833318	2833469	chrI	2833316	2833467	putative_enhancer	transcription_initiation	transcription_initiation	.	.	.	.	.	.	WBGene00021126	W10C8.3	2833321	2833310	2833319	2833308	True	True	False	False	False	False	False	False	False	False	False	False	False	False	False	True	False	False	False	False	False	False	False	True	False	False	False	False	False
chrI	2834251	2834402	chrI	2834249	2834400	putative_enhancer	transcription_initiation	transcription_initiation	.	.	.	.	.	.	WBGene00021126	W10C8.3	2834284	2834294	2834282	2834292	True	True	False	False	False	False	False	False	False	False	False	False	False	False	False	False	False	False	False	False	False	False	False	False	False	False	False	False	False
chrI	2835356	2835507	chrI	2835354	2835505	putative_enhancer	transcription_initiation	transcription_initiation	.	.	.	.	.	.	WBGene00021126	W10C8.3	2835499	2835380	2835497	2835378	True	True	False	False	False	False	False	False	False	False	False	False	False	False	False	False	False	False	False	False	False	False	False	True	False	False	False	False	False
chrI	2835759	2835910	chrI	2835757	2835908	putative_enhancer	transcription_initiation	transcription_initiation	.	.	.	.	.	.	WBGene00021126	W10C8.3	2835851	2835720	2835849	2835718	True	True	False	False	False	False	False	False	False	False	False	False	False	True	False	False	False	False	False	False	False	False	False	False	False	False	False	False	False
chrI	2836926	2837077	chrI	2836924	2837075	coding_promoter	no_transcription	coding_promoter	.	.	.	WBGene00021126	W10C8.3	protein_coding	.	.	2837061	2836900	2837059	2836898	False	True	False	False	False	False	False	False	False	False	False	False	False	False	False	False	False	False	False	False	False	False	False	False	False	False	False	False	False
chrI	2837867	2838018	chrI	2837865	2838016	putative_enhancer	transcription_initiation	transcription_initiation	.	.	.	.	.	.	.	.	2838005	2837921	2838003	2837919	True	True	False	False	False	False	False	False	False	False	False	False	False	False	False	False	False	False	False	False	False	False	False	False	False	False	False	False	False
chrI	2838436	2838587	chrI	2838434	2838585	other_element	no_transcription	no_transcription	.	.	.	.	.	.	.	.	2838571	2838451	2838569	2838449	False	False	False	False	False	False	False	False	False	False	False	False	False	False	False	False	False	False	False	False	False	False	False	False	False	False	False	False	False
chrI	2839724	2839875	chrI	2839722	2839873	putative_enhancer	transcription_initiation	transcription_initiation	.	.	.	.	.	.	.	.	2839896	2839693	2839894	2839691	True	True	False	False	False	False	False	False	False	False	False	False	False	False	False	False	False	False	False	False	False	False	False	False	False	False	False	False	False
chrI	2841022	2841173	chrI	2841020	2841171	unassigned_promoter	transcription_initiation	unassigned_promoter	.	.	.	.	.	.	.	.	2841067	2841197	2841065	2841195	True	True	False	False	False	False	False	False	False	False	False	False	False	False	False	False	False	False	False	False	False	False	False	False	False	False	False	False	False
chrI	2842176	2842327	chrI	2842174	2842325	putative_enhancer	transcription_initiation	transcription_initiation	.	.	.	.	.	.	.	.	2842282	2842147	2842280	2842145	True	True	False	False	False	False	False	False	False	False	False	False	False	False	False	False	False	False	False	False	False	False	False	False	False	False	False	False	False
chrI	2844236	2844387	chrI	2844234	2844385	putative_enhancer	transcription_initiation	transcription_initiation	.	.	.	.	.	.	.	.	2844372	2844309	2844370	2844307	True	True	False	False	False	False	False	False	False	False	False	False	False	False	False	False	False	False	False	False	False	False	False	False	False	False	False	False	False
chrI	2844483	2844634	chrI	2844481	2844632	unassigned_promoter	transcription_initiation	unassigned_promoter	.	.	.	.	.	.	.	.	2844611	2844489	2844609	2844487	True	True	False	False	False	False	False	False	False	False	False	False	False	False	False	False	False	False	False	False	False	False	False	False	False	True	False	False	False
chrI	2845625	2845776	chrI	2845623	2845774	coding_promoter	coding_promoter	transcription_initiation	WBGene00021125	ccb-2	protein_coding	.	.	.	.	.	2845691	2845617	2845689	2845615	True	True	False	False	False	False	False	False	False	False	False	False	False	False	False	False	False	False	False	False	False	False	False	False	False	False	False	False	False
chrI	2848485	2848636	chrI	2848483	2848634	unassigned_promoter	no_transcription	unassigned_promoter	.	.	.	.	.	.	WBGene00021125	ccb-2	2848620	2848531	2848618	2848529	False	True	False	False	False	False	False	False	False	False	False	False	False	False	False	False	False	False	False	False	False	False	False	False	True	False	False	False	False
chrI	2850850	2851001	chrI	2850848	2850999	unassigned_promoter	no_transcription	unassigned_promoter	.	.	.	.	.	.	.	.	2850985	2850828	2850983	2850826	False	True	False	False	False	False	False	False	False	False	False	False	False	False	False	False	False	False	False	False	False	False	True	False	False	False	True	True	False
chrI	2853811	2853962	chrI	2853809	2853960	coding_promoter	no_transcription	coding_promoter	.	.	.	WBGene00021127	W10C8.4	protein_coding	.	.	2853946	2853841	2853944	2853839	False	True	False	False	False	False	False	False	False	False	False	False	False	False	False	False	False	False	False	False	True	False	False	False	True	False	False	False	False
chrI	2855020	2855171	chrI	2855018	2855169	putative_enhancer	no_transcription	transcription_initiation	.	.	.	.	.	.	WBGene00021128	W10C8.5	2855155	2855138	2855153	2855136	False	True	False	False	False	False	False	False	False	False	False	False	False	False	False	False	False	False	False	False	False	False	False	False	False	False	False	False	False
chrI	2856446	2856597	chrI	2856444	2856595	putative_enhancer	transcription_initiation	transcription_initiation	.	.	.	.	.	.	WBGene00021128	W10C8.5	2856643	2856558	2856641	2856556	True	True	False	False	False	False	False	False	False	False	False	False	False	False	False	False	False	False	False	False	False	False	False	False	False	False	False	False	False
chrI	2857703	2857854	chrI	2857701	2857852	coding_promoter	coding_promoter	coding_promoter	WBGene00022116	Y71F9AL.11	protein_coding	WBGene00021128	W10C8.5	protein_coding	.	.	2857861	2857762	2857859	2857760	True	True	False	True	True	True	True	True	True	False	False	False	False	False	False	False	False	False	True	False	False	False	False	False	True	True	True	True	True
chrI	2859858	2860009	chrI	2859856	2860007	coding_promoter	coding_promoter	coding_promoter	WBGene00022116	Y71F9AL.11	protein_coding	WBGene00044433	W10C8.6	protein_coding	.	.	2859974	2859862	2859972	2859860	True	True	False	False	False	False	False	False	False	False	False	False	False	False	False	False	False	False	False	False	True	False	True	True	False	True	True	True	False
chrI	2861128	2861279	chrI	2861126	2861277	coding_promoter	coding_promoter	transcription_initiation	WBGene00022116	Y71F9AL.11	protein_coding	.	.	.	.	.	2861283	2861102	2861281	2861100	True	True	True	False	False	False	False	False	False	False	False	False	False	False	False	False	False	False	False	False	False	False	False	False	False	False	False	False	False
chrI	2861651	2861802	chrI	2861649	2861800	coding_promoter	coding_promoter	transcription_initiation	WBGene00022116	Y71F9AL.11	protein_coding	.	.	.	.	.	2861808	2861664	2861806	2861662	True	True	False	False	False	False	False	True	False	False	False	False	False	False	False	False	False	False	False	False	False	False	False	False	False	False	False	False	False
chrI	2861885	2862036	chrI	2861883	2862034	coding_promoter	coding_promoter	transcription_initiation	WBGene00022116	Y71F9AL.11	protein_coding	.	.	.	.	.	2861996	2861904	2861994	2861902	True	True	False	False	True	False	False	True	True	True	True	True	True	False	False	False	False	False	False	False	False	False	False	False	False	False	False	False	False
chrI	2864082	2864233	chrI	2864080	2864231	putative_enhancer	transcription_initiation	transcription_initiation	.	.	.	.	.	.	WBGene00022116	Y71F9AL.11	2864199	2864096	2864197	2864094	True	True	False	False	True	False	False	False	False	False	False	True	False	False	False	False	False	False	False	False	False	False	True	False	False	False	False	False	False
chrI	2866288	2866439	chrI	2866286	2866437	coding_promoter	coding_promoter	no_transcription	WBGene00022115	Y71F9AL.10	protein_coding	.	.	.	.	.	2866421	2866303	2866419	2866301	True	False	True	True	True	True	True	True	True	True	True	True	True	False	False	False	False	False	False	False	False	False	False	False	False	False	False	False	False
chrI	2869937	2870088	chrI	2869935	2870086	putative_enhancer	transcription_initiation	transcription_initiation	.	.	.	.	.	.	WBGene00022115	Y71F9AL.10	2869902	2869939	2869900	2869937	True	True	False	False	False	False	False	False	False	False	False	False	False	False	False	False	False	False	False	False	False	False	False	False	False	False	False	False	False
chrI	2875199	2875350	chrI	2875197	2875348	coding_promoter	no_transcription	coding_promoter	.	.	.	WBGene00022117	Y71F9AL.12	protein_coding	.	.	2875334	2875364	2875332	2875362	False	True	False	False	False	False	False	False	False	False	False	False	False	False	True	False	False	False	False	False	False	False	False	False	False	False	False	False	False
chrI	2875482	2875633	chrI	2875480	2875631	putative_enhancer	transcription_initiation	transcription_initiation	.	.	.	.	.	.	WBGene00004412	rpl-1	2875510	2875587	2875508	2875585	True	True	False	False	False	False	False	False	False	False	False	False	False	False	False	False	False	False	False	False	False	False	True	False	False	False	False	False	False
chrI	2876077	2876228	chrI	2876075	2876226	putative_enhancer	no_transcription	transcription_initiation	.	.	.	.	.	.	WBGene00004412	rpl-1	2876212	2876234	2876210	2876232	False	True	False	False	False	False	False	False	False	False	False	False	False	False	False	False	False	False	False	False	False	False	False	False	False	False	False	False	False
chrI	2876503	2876654	chrI	2876501	2876652	coding_promoter	coding_promoter	coding_promoter	WBGene00022114	Y71F9AL.9	protein_coding	WBGene00004412	rpl-1	protein_coding	.	.	2876570	2876467	2876568	2876465	True	True	True	True	True	True	True	True	False	False	False	False	False	False	True	True	True	True	True	True	True	True	False	True	True	True	True	True	True
chrI	2876648	2876799	chrI	2876646	2876797	coding_promoter	coding_promoter	coding_promoter	WBGene00022114	Y71F9AL.9	protein_coding	WBGene00004412	rpl-1	protein_coding	.	.	2876835	2876738	2876833	2876736	True	True	True	True	True	True	True	True	True	True	True	True	True	False	False	False	False	False	False	False	False	False	False	False	False	False	False	False	False
chrI	2878650	2878801	chrI	2878648	2878799	putative_enhancer	no_transcription	transcription_initiation	.	.	.	.	.	.	WBGene00022113	Y71F9AL.8	2878785	2878764	2878783	2878762	False	True	False	False	False	False	False	False	False	False	False	False	False	False	False	False	False	False	False	False	False	False	False	False	False	False	False	False	False
chrI	2887301	2887452	chrI	2887299	2887450	unassigned_promoter	unassigned_promoter	transcription_initiation	.	.	.	.	.	.	WBGene00000199,WBGene00022118	arx-1,dnc-5	2887435	2887277	2887433	2887275	True	True	True	False	False	False	False	False	False	True	False	False	False	True	True	False	True	False	False	False	False	True	False	False	False	False	False	False	False
chrI	2887714	2887865	chrI	2887712	2887863	coding_promoter	coding_promoter	transcription_initiation	WBGene00022112	Y71F9AL.7	protein_coding	.	.	.	.	.	2887785	2887802	2887783	2887800	True	True	True	False	False	False	False	True	False	False	False	False	False	False	True	False	True	False	True	False	False	False	False	False	False	False	False	False	False
chrI	2888792	2888943	chrI	2888790	2888941	non-coding_RNA	transcription_initiation	non-coding_RNA	.	.	.	WBGene00220195	Y71F9AL.24	snoRNA	.	.	2888946	2888747	2888944	2888745	True	True	True	False	False	False	False	True	False	False	False	False	False	False	False	False	False	False	True	False	False	False	False	False	False	False	False	False	False
chrI	2889520	2889671	chrI	2889518	2889669	putative_enhancer	transcription_initiation	no_transcription	.	.	.	.	.	.	WBGene00000199	arx-1	2889631	2889535	2889629	2889533	True	False	False	False	False	False	False	False	False	False	False	False	False	False	False	False	False	False	False	False	False	False	False	False	False	False	False	False	False
chrI	2890357	2890508	chrI	2890355	2890506	putative_enhancer	transcription_initiation	transcription_initiation	.	.	.	.	.	.	WBGene00000199,WBGene00022111	Y71F9AL.6,arx-1	2890473	2890380	2890471	2890378	True	True	False	False	False	False	False	False	False	False	False	False	False	False	False	False	False	False	False	False	False	False	False	False	False	False	False	False	False
chrI	2890690	2890841	chrI	2890688	2890839	putative_enhancer	transcription_initiation	transcription_initiation	.	.	.	.	.	.	WBGene00000199,WBGene00022111	Y71F9AL.6,arx-1	2890824	2890661	2890822	2890659	True	True	True	False	False	False	False	True	False	False	False	False	False	False	False	False	False	False	False	False	False	False	False	False	False	False	False	False	False
chrI	2895108	2895259	chrI	2895106	2895257	putative_enhancer	transcription_initiation	transcription_initiation	.	.	.	.	.	.	.	.	2895226	2895140	2895224	2895138	True	True	False	False	False	False	False	False	False	False	False	False	False	False	False	False	False	False	False	False	False	False	False	True	False	False	False	False	False
chrI	2901021	2901172	chrI	2901019	2901170	coding_promoter	coding_promoter	coding_promoter	WBGene00001791	gst-43	protein_coding	WBGene00022119	copa-1	protein_coding	.	.	2901120	2901030	2901118	2901028	True	True	True	True	True	True	True	True	False	True	True	True	True	True	True	True	True	True	True	False	True	False	True	True	True	True	True	True	True
chrI	2904170	2904321	chrI	2904168	2904319	putative_enhancer	transcription_initiation	no_transcription	.	.	.	.	.	.	WBGene00022110	Y71F9AL.4	2904350	2904185	2904348	2904183	True	False	False	False	False	False	False	False	False	False	False	False	False	False	False	False	False	False	False	False	False	False	False	False	False	False	False	False	False
chrI	2905738	2905889	chrI	2905736	2905887	putative_enhancer	transcription_initiation	no_transcription	.	.	.	.	.	.	WBGene00022110	Y71F9AL.4	2905878	2905753	2905876	2905751	True	False	True	True	True	True	False	True	False	False	False	False	False	False	False	False	False	False	False	False	False	False	False	False	True	True	False	True	True
chrI	2924781	2924932	chrI	2924779	2924930	coding_promoter	coding_promoter	coding_promoter	WBGene00022107	Y71F9AL.1	protein_coding	WBGene00004049	parp-1	protein_coding	.	.	2924950	2924836	2924948	2924834	True	True	True	True	True	True	True	True	False	False	False	False	False	True	True	True	True	True	True	False	True	True	False	True	True	True	True	True	True
chrI	2925100	2925251	chrI	2925098	2925249	putative_enhancer	transcription_initiation	transcription_initiation	.	.	.	.	.	.	WBGene00022107	Y71F9AL.1	2925296	2925132	2925294	2925130	True	True	True	True	True	True	True	True	False	False	False	False	True	False	False	False	False	False	False	False	False	False	False	False	False	False	False	False	False
chrI	2928125	2928276	chrI	2928123	2928274	coding_promoter	coding_promoter	unassigned_promoter	WBGene00022122	trap-1	protein_coding	.	.	.	.	.	2928233	2928140	2928231	2928138	True	True	True	True	True	True	True	True	True	True	True	True	True	False	False	False	False	False	False	False	True	True	False	False	False	True	True	True	True
chrI	2929661	2929812	chrI	2929659	2929810	coding_promoter	coding_promoter	transcription_initiation	WBGene00003836	nxt-1	protein_coding	.	.	.	.	.	2929814	2929713	2929812	2929711	True	True	True	True	False	False	True	True	False	False	True	False	True	False	False	False	False	False	False	False	False	False	False	False	False	False	False	False	False
chrI	2935661	2935812	chrI	2935659	2935810	coding_promoter	coding_promoter	transcription_initiation	WBGene00022121	cogc-3	protein_coding	.	.	.	.	.	2935786	2935643	2935784	2935641	True	True	False	False	False	False	False	False	True	True	False	False	False	False	False	False	False	False	False	False	False	False	False	False	False	False	False	False	False
chrI	2944686	2944837	chrI	2944684	2944835	putative_enhancer	no_transcription	transcription_initiation	.	.	.	.	.	.	WBGene00022121	cogc-3	2944821	2944829	2944819	2944827	False	True	False	False	False	False	False	False	False	False	False	False	False	False	False	False	False	False	False	False	False	False	False	False	False	False	False	False	False
chrI	2944866	2945017	chrI	2944864	2945015	putative_enhancer	transcription_initiation	transcription_initiation	.	.	.	.	.	.	WBGene00022121	cogc-3	2945028	2944829	2945026	2944827	True	True	True	True	True	True	True	True	True	False	False	True	True	False	False	False	True	True	True	True	True	False	False	True	False	False	False	False	False
chrI	2945479	2945630	chrI	2945477	2945628	putative_enhancer	transcription_initiation	transcription_initiation	.	.	.	.	.	.	WBGene00022121	cogc-3	2945649	2945529	2945647	2945527	True	True	False	False	False	False	False	False	False	False	False	False	False	False	False	False	False	False	False	False	False	False	False	False	False	False	False	False	False
chrI	2945811	2945962	chrI	2945809	2945960	putative_enhancer	transcription_initiation	no_transcription	.	.	.	.	.	.	WBGene00022121	cogc-3	2946010	2945826	2946008	2945824	True	False	False	False	False	False	False	False	False	False	False	False	False	False	False	False	False	False	False	False	False	False	False	False	True	False	False	False	False
chrI	2959264	2959415	chrI	2959262	2959413	other_element	no_transcription	no_transcription	.	.	.	.	.	.	WBGene00000237	bam-2	2959399	2959279	2959397	2959277	False	False	False	False	False	False	False	False	False	False	False	False	False	False	False	False	False	False	False	False	False	False	True	False	False	False	False	False	False
chrI	2960618	2960769	chrI	2960616	2960767	putative_enhancer	no_transcription	transcription_initiation	.	.	.	.	.	.	WBGene00000237	bam-2	2960753	2960633	2960751	2960631	False	True	False	False	False	False	False	False	False	False	False	False	False	False	False	False	False	False	False	False	False	False	False	False	False	False	False	False	False
chrI	2962106	2962257	chrI	2962104	2962255	putative_enhancer	transcription_initiation	transcription_initiation	.	.	.	.	.	.	WBGene00000237	bam-2	2962275	2962212	2962273	2962210	True	True	False	False	False	False	False	False	False	False	False	False	False	False	False	False	False	False	False	False	False	False	False	False	False	False	False	False	False
chrI	2962421	2962572	chrI	2962419	2962570	coding_promoter	transcription_initiation	coding_promoter	.	.	.	WBGene00000237	bam-2	protein_coding	.	.	2962530	2962436	2962528	2962434	True	False	False	False	False	False	False	False	False	False	False	False	False	False	False	False	False	False	False	False	False	True	False	True	False	True	True	True	True
chrI	2964485	2964636	chrI	2964483	2964634	putative_enhancer	transcription_initiation	transcription_initiation	.	.	.	.	.	.	.	.	2964658	2964481	2964656	2964479	True	True	False	False	False	False	False	False	False	False	False	False	False	False	False	False	False	False	False	False	False	False	False	False	False	False	False	False	False
chrI	2965537	2965688	chrI	2965535	2965686	putative_enhancer	transcription_initiation	transcription_initiation	.	.	.	.	.	.	.	.	2965655	2965567	2965653	2965565	True	True	False	False	False	False	False	False	False	False	False	False	False	False	False	False	False	False	False	False	False	False	False	False	False	False	False	False	False
chrI	2966471	2966622	chrI	2966469	2966620	putative_enhancer	no_transcription	transcription_initiation	.	.	.	.	.	.	.	.	2966606	2966459	2966604	2966457	False	True	False	False	False	False	False	False	False	False	False	False	False	False	False	False	False	False	False	False	False	False	False	False	False	False	False	False	False
chrI	2967169	2967320	chrI	2967167	2967318	other_element	no_transcription	no_transcription	.	.	.	.	.	.	.	.	2967304	2967184	2967302	2967182	False	False	False	False	False	False	False	False	False	False	False	False	False	False	False	False	False	False	False	False	False	False	False	False	False	False	False	False	False
chrI	2967716	2967867	chrI	2967714	2967865	putative_enhancer	no_transcription	transcription_initiation	.	.	.	.	.	.	.	.	2967851	2967684	2967849	2967682	False	True	False	False	False	False	False	False	False	False	False	False	False	False	False	False	False	False	False	False	False	False	False	False	False	False	False	False	False
chrI	2969656	2969807	chrI	2969654	2969805	putative_enhancer	transcription_initiation	transcription_initiation	.	.	.	.	.	.	.	.	2969721	2969760	2969719	2969758	True	True	False	False	False	False	False	False	False	False	False	False	False	False	False	False	False	False	False	False	False	False	False	False	False	False	False	False	False
chrI	2970732	2970883	chrI	2970730	2970881	putative_enhancer	no_transcription	transcription_initiation	.	.	.	.	.	.	.	.	2970867	2970729	2970865	2970727	False	True	False	False	False	False	False	False	False	False	False	False	False	False	False	False	False	False	False	False	False	False	False	False	False	False	False	False	False
chrI	2971082	2971233	chrI	2971080	2971231	putative_enhancer	transcription_initiation	no_transcription	.	.	.	.	.	.	.	.	2971196	2971097	2971194	2971095	True	False	False	False	False	False	False	False	False	False	False	False	False	False	False	False	False	False	False	False	False	False	False	False	False	False	False	False	False
chrI	2974816	2974967	chrI	2974814	2974965	putative_enhancer	transcription_initiation	transcription_initiation	.	.	.	.	.	.	.	.	2975001	2974829	2974999	2974827	True	True	False	False	False	False	False	False	False	False	False	False	False	False	False	False	False	False	False	False	False	False	False	False	False	False	False	False	False
chrI	2976344	2976495	chrI	2976342	2976493	putative_enhancer	no_transcription	transcription_initiation	.	.	.	.	.	.	.	.	2976479	2976298	2976477	2976296	False	True	False	False	False	False	False	False	False	False	False	False	False	False	False	False	False	False	False	False	False	False	False	False	False	False	False	False	False
chrI	2978608	2978759	chrI	2978606	2978757	putative_enhancer	no_transcription	transcription_initiation	.	.	.	.	.	.	.	.	2978743	2978614	2978741	2978612	False	True	False	False	False	False	False	False	False	False	False	False	False	False	False	False	False	False	False	False	False	False	False	False	False	False	False	False	False
chrI	2979653	2979804	chrI	2979651	2979802	putative_enhancer	no_transcription	transcription_initiation	.	.	.	.	.	.	.	.	2979788	2979716	2979786	2979714	False	True	False	False	False	False	False	False	False	False	False	False	False	False	False	False	False	False	False	False	False	False	False	False	False	False	False	False	False
chrI	2984459	2984610	chrI	2984457	2984608	unassigned_promoter	unassigned_promoter	no_transcription	.	.	.	.	.	.	WBGene00022123	Y71F9AR.2	2984609	2984474	2984607	2984472	True	False	True	False	False	False	False	False	False	False	True	True	True	True	True	False	False	False	False	False	False	True	True	True	False	True	False	False	False
chrI	2985180	2985331	chrI	2985178	2985329	coding_promoter	transcription_initiation	coding_promoter	.	.	.	WBGene00022123	Y71F9AR.2	protein_coding	.	.	2985378	2985182	2985376	2985180	True	True	False	False	False	False	False	False	False	False	False	False	False	False	False	False	False	False	False	False	False	False	False	False	True	False	False	False	False
chrI	2995979	2996130	chrI	2995977	2996128	coding_promoter	coding_promoter	coding_promoter	WBGene00001046	dnj-28	protein_coding	WBGene00022124	supr-1	protein_coding	.	.	2996114	2996000	2996112	2995998	False	True	True	True	False	False	True	False	False	False	False	False	False	True	False	True	False	True	True	False	False	False	False	False	True	True	True	True	True
chrI	2996294	2996445	chrI	2996292	2996443	coding_promoter	coding_promoter	transcription_initiation	WBGene00001046	dnj-28	protein_coding	.	.	.	.	.	2996441	2996385	2996439	2996383	True	True	True	True	True	True	True	True	False	False	False	True	True	False	False	False	False	False	False	False	False	False	True	True	False	False	False	False	False
chrI	2996729	2996880	chrI	2996727	2996878	other_element	no_transcription	no_transcription	.	.	.	.	.	.	WBGene00001046	dnj-28	2996864	2996744	2996862	2996742	False	False	False	False	False	False	False	False	False	False	False	False	False	False	False	False	False	False	False	False	False	False	False	False	False	False	False	False	False
chrI	3004037	3004188	chrI	3004035	3004186	putative_enhancer	transcription_initiation	transcription_initiation	.	.	.	.	.	.	WBGene00021838	Y54E10BL.3	3004158	3004013	3004156	3004011	True	True	False	True	True	False	False	False	False	False	True	False	False	False	False	False	True	False	False	False	False	True	False	False	False	False	False	False	False
chrI	3010416	3010567	chrI	3010414	3010565	coding_promoter	coding_promoter	transcription_initiation	WBGene00000625	col-48	protein_coding	.	.	.	.	.	3010584	3010422	3010582	3010420	True	True	True	True	True	True	True	True	True	True	False	True	True	False	True	True	False	False	True	True	True	False	True	True	False	False	False	False	False
chrI	3011799	3011950	chrI	3011797	3011948	coding_promoter	coding_promoter	no_transcription	WBGene00021837	Y54E10BL.1	protein_coding	.	.	.	.	.	3011934	3011814	3011932	3011812	False	False	False	False	False	False	False	False	False	False	False	False	False	False	False	False	False	False	False	False	False	False	False	False	False	False	False	False	False
chrI	3014749	3014900	chrI	3014747	3014898	putative_enhancer	transcription_initiation	transcription_initiation	.	.	.	.	.	.	WBGene00003186	mek-2	3014785	3014804	3014783	3014802	True	True	False	False	False	False	False	False	False	False	False	False	False	False	False	False	False	False	False	False	False	False	False	False	False	False	False	False	False
chrI	3015399	3015550	chrI	3015397	3015548	coding_promoter	coding_promoter	coding_promoter	WBGene00021843	Y54E10BR.4	protein_coding	WBGene00003186	mek-2	protein_coding	.	.	3015540	3015454	3015538	3015452	True	True	True	True	True	True	True	True	True	True	False	False	True	False	False	False	True	True	True	True	True	True	False	True	True	True	True	True	True
chrI	3015708	3015859	chrI	3015706	3015857	coding_promoter	transcription_initiation	coding_promoter	.	.	.	WBGene00003186	mek-2	protein_coding	.	.	3015833	3015726	3015831	3015724	True	True	False	False	False	False	False	False	False	False	False	False	False	False	False	False	False	False	False	False	False	False	False	False	False	False	False	False	False
chrI	3019830	3019981	chrI	3019828	3019979	other_element	no_transcription	no_transcription	.	.	.	.	.	.	WBGene00021843	Y54E10BR.4	3019965	3019845	3019963	3019843	False	False	False	False	False	False	False	False	False	False	False	False	False	False	False	False	False	False	False	False	False	False	False	False	False	False	False	False	False
chrI	3023227	3023378	chrI	3023225	3023376	other_element	no_transcription	no_transcription	.	.	.	.	.	.	WBGene00021842	Y54E10BR.3	3023362	3023242	3023360	3023240	False	False	False	False	False	False	False	False	False	False	False	False	False	False	False	False	False	False	False	False	False	False	False	False	False	False	False	False	False
chrI	3032846	3032997	chrI	3032844	3032995	coding_promoter	coding_promoter	transcription_initiation	WBGene00021841	Y54E10BR.2	protein_coding	.	.	.	.	.	3032988	3032914	3032986	3032912	True	True	True	True	True	True	True	True	True	True	True	True	False	True	True	False	False	False	True	True	True	True	True	False	False	True	True	False	True
chrI	3035124	3035275	chrI	3035122	3035273	putative_enhancer	transcription_initiation	no_transcription	.	.	.	.	.	.	WBGene00003387	mod-5	3035222	3035139	3035220	3035137	True	False	False	False	False	False	False	False	False	False	False	False	False	False	False	False	False	False	False	False	False	False	False	False	False	False	False	False	False
chrI	3035947	3036098	chrI	3035945	3036096	other_element	no_transcription	no_transcription	.	.	.	.	.	.	WBGene00003387	mod-5	3036082	3035962	3036080	3035960	False	False	True	True	True	False	True	False	False	False	False	True	False	False	False	False	False	True	False	True	False	False	True	True	False	False	False	False	False
chrI	3038055	3038206	chrI	3038053	3038204	other_element	no_transcription	no_transcription	.	.	.	.	.	.	WBGene00003387	mod-5	3038190	3038070	3038188	3038068	False	False	False	False	False	False	False	False	False	False	False	False	False	False	False	False	False	False	False	False	False	False	False	False	False	False	False	False	False
chrI	3049445	3049596	chrI	3049443	3049594	coding_promoter	transcription_initiation	coding_promoter	.	.	.	WBGene00003387	mod-5	protein_coding	.	.	3049636	3049409	3049634	3049407	True	True	False	False	False	False	False	False	False	False	False	False	False	False	True	False	True	False	False	False	False	False	False	False	False	False	True	True	False
chrI	3059139	3059290	chrI	3059137	3059288	coding_promoter	coding_promoter	coding_promoter	WBGene00021840	pign-1	protein_coding	WBGene00021846	ztf-23	protein_coding	.	.	3059236	3059147	3059234	3059145	True	True	True	True	True	True	True	True	True	True	True	True	True	True	True	True	True	False	True	True	True	True	True	True	True	True	True	True	True
chrI	3070090	3070241	chrI	3070088	3070239	coding_promoter	transcription_initiation	coding_promoter	.	.	.	WBGene00000205	arx-7	protein_coding	.	.	3070064	3070244	3070062	3070242	True	True	False	False	False	False	False	False	False	False	False	False	False	True	False	False	True	True	False	False	False	False	False	False	True	True	True	True	True
chrI	3085144	3085295	chrI	3085142	3085293	other_element	no_transcription	no_transcription	.	.	.	.	.	.	WBGene00019698	riok-1	3085279	3085159	3085277	3085157	False	False	False	False	False	False	False	False	False	False	False	False	False	False	False	False	False	False	False	False	False	False	False	False	False	False	False	False	False
chrI	3085398	3085549	chrI	3085396	3085547	putative_enhancer	transcription_initiation	no_transcription	.	.	.	.	.	.	WBGene00019698	riok-1	3085537	3085413	3085535	3085411	True	False	False	False	False	False	False	False	False	False	False	False	False	False	False	False	False	False	False	False	False	False	False	False	True	True	True	True	True
chrI	3087190	3087341	chrI	3087188	3087339	putative_enhancer	transcription_initiation	transcription_initiation	.	.	.	.	.	.	WBGene00019698	riok-1	3087317	3087156	3087315	3087154	True	True	False	False	False	False	False	False	False	False	False	False	False	False	False	False	False	False	False	False	False	False	False	False	False	False	False	False	False
chrI	3089163	3089314	chrI	3089161	3089312	putative_enhancer	transcription_initiation	transcription_initiation	.	.	.	.	.	.	WBGene00019698	riok-1	3089258	3089222	3089256	3089220	True	True	False	False	False	False	False	False	False	False	False	False	False	False	False	False	False	False	False	False	False	False	False	False	False	False	False	False	False
chrI	3089791	3089942	chrI	3089789	3089940	putative_enhancer	transcription_initiation	no_transcription	.	.	.	.	.	.	WBGene00019698	riok-1	3089901	3089806	3089899	3089804	True	False	False	False	False	False	False	False	False	False	False	False	False	False	False	False	False	False	False	False	False	False	False	False	False	False	False	False	False
chrI	3094265	3094416	chrI	3094263	3094414	putative_enhancer	transcription_initiation	no_transcription	.	.	.	.	.	.	WBGene00019698	riok-1	3094430	3094280	3094428	3094278	True	False	False	False	False	False	False	False	False	False	False	False	False	False	False	False	False	False	False	False	False	False	False	False	False	False	False	False	False
chrI	3096263	3096414	chrI	3096261	3096412	coding_promoter	transcription_initiation	coding_promoter	.	.	.	WBGene00019698	riok-1	protein_coding	.	.	3096413	3096235	3096411	3096233	True	True	False	False	False	False	False	False	False	False	False	False	False	False	False	False	False	False	False	False	False	False	False	False	True	True	True	True	True
chrI	3097465	3097616	chrI	3097463	3097614	putative_enhancer	transcription_initiation	no_transcription	.	.	.	.	.	.	WBGene00003654	nhr-64	3097452	3097480	3097450	3097478	True	False	False	False	False	False	False	False	False	False	False	False	False	False	False	False	False	False	False	False	False	False	False	False	False	False	False	False	False
chrI	3098511	3098662	chrI	3098509	3098660	other_element	no_transcription	no_transcription	.	.	.	.	.	.	WBGene00003654	nhr-64	3098646	3098526	3098644	3098524	False	False	False	False	False	False	False	False	False	False	False	False	False	False	False	False	False	False	False	False	False	False	False	False	False	False	False	False	False
chrI	3098785	3098936	chrI	3098783	3098934	putative_enhancer	transcription_initiation	transcription_initiation	.	.	.	.	.	.	WBGene00003654	nhr-64	3098775	3098818	3098773	3098816	True	True	False	False	False	False	False	False	False	False	False	False	False	False	False	False	False	False	False	False	False	False	False	False	False	False	False	False	False
chrI	3099949	3100100	chrI	3099947	3100098	putative_enhancer	transcription_initiation	transcription_initiation	.	.	.	.	.	.	WBGene00003654	nhr-64	3100058	3099947	3100056	3099945	True	True	False	False	False	False	False	False	False	False	False	False	False	False	False	False	False	False	False	False	False	False	False	False	False	False	False	False	False
chrI	3100924	3101075	chrI	3100922	3101073	putative_enhancer	transcription_initiation	transcription_initiation	.	.	.	.	.	.	WBGene00003654	nhr-64	3101042	3100942	3101040	3100940	True	True	False	False	False	False	False	False	False	False	False	False	False	False	False	False	False	False	False	False	False	False	False	False	False	False	False	False	False
chrI	3101801	3101952	chrI	3101799	3101950	unassigned_promoter	transcription_initiation	unassigned_promoter	.	.	.	.	.	.	WBGene00003654	nhr-64	3101959	3101773	3101957	3101771	True	True	False	False	False	False	False	False	False	False	False	False	False	False	False	False	False	False	False	False	False	False	False	False	False	False	True	False	False
chrI	3102199	3102350	chrI	3102197	3102348	unassigned_promoter	transcription_initiation	unassigned_promoter	.	.	.	.	.	.	WBGene00003654	nhr-64	3102309	3102265	3102307	3102263	True	True	False	False	False	False	False	False	False	False	False	False	False	False	False	False	False	False	False	False	False	False	False	False	False	True	False	False	False
chrI	3103188	3103339	chrI	3103186	3103337	coding_promoter	coding_promoter	unassigned_promoter	WBGene00003654	nhr-64	protein_coding	.	.	.	.	.	3103253	3103202	3103251	3103200	True	True	False	False	True	False	False	False	False	False	False	False	False	False	False	False	False	False	False	False	False	False	False	False	False	False	False	False	False
chrI	3105186	3105337	chrI	3105184	3105335	putative_enhancer	transcription_initiation	transcription_initiation	.	.	.	.	.	.	WBGene00003654	nhr-64	3105223	3105226	3105221	3105224	True	True	False	False	False	False	False	False	False	False	False	False	False	False	False	False	False	False	False	False	False	False	False	False	False	False	False	False	False
chrI	3105536	3105687	chrI	3105534	3105685	unassigned_promoter	no_transcription	unassigned_promoter	.	.	.	.	.	.	WBGene00003654	nhr-64	3105671	3105596	3105669	3105594	False	True	False	False	False	False	False	False	False	False	False	False	False	False	False	False	False	False	False	False	False	False	False	False	False	True	True	True	True
chrI	3105783	3105934	chrI	3105781	3105932	other_element	no_transcription	no_transcription	.	.	.	.	.	.	WBGene00003654	nhr-64	3105918	3105798	3105916	3105796	False	False	False	False	False	False	False	False	False	False	False	False	False	False	False	False	False	False	False	False	False	False	False	False	False	False	False	False	False
chrI	3106566	3106717	chrI	3106564	3106715	putative_enhancer	transcription_initiation	transcription_initiation	.	.	.	.	.	.	WBGene00003654	nhr-64	3106720	3106573	3106718	3106571	True	True	False	False	False	False	False	False	False	False	False	False	False	False	False	False	False	False	False	False	False	False	False	False	False	False	False	False	False
chrI	3110728	3110879	chrI	3110726	3110877	coding_promoter	transcription_initiation	coding_promoter	.	.	.	WBGene00195056	C45E1.5	protein_coding	.	.	3110837	3110727	3110835	3110725	True	True	False	False	False	False	False	False	False	False	False	False	False	False	False	False	False	False	False	False	False	False	False	False	False	False	False	False	False
chrI	3113687	3113838	chrI	3113685	3113836	other_element	no_transcription	no_transcription	.	.	.	.	.	.	.	.	3113822	3113702	3113820	3113700	False	False	False	False	False	False	False	False	False	False	False	False	False	False	False	False	True	False	False	False	False	False	False	False	False	False	False	False	False
chrI	3114017	3114168	chrI	3114015	3114166	other_element	no_transcription	no_transcription	.	.	.	.	.	.	.	.	3114152	3114032	3114150	3114030	False	False	False	False	False	False	False	False	False	False	False	False	False	False	False	False	False	False	False	False	False	False	False	False	False	False	False	False	False
chrI	3117412	3117563	chrI	3117410	3117561	putative_enhancer	transcription_initiation	no_transcription	.	.	.	.	.	.	WBGene00016663	C45E1.4	3117516	3117427	3117514	3117425	True	False	False	False	False	False	False	False	False	False	False	False	False	False	False	False	False	False	False	False	False	False	False	False	False	False	False	False	False
chrI	3119100	3119251	chrI	3119098	3119249	coding_promoter	transcription_initiation	coding_promoter	.	.	.	WBGene00016663	C45E1.4	protein_coding	.	.	3119294	3119116	3119292	3119114	True	True	False	False	False	False	False	False	False	False	False	False	False	False	False	False	False	False	False	False	False	False	False	False	False	False	True	False	False
chrI	3121751	3121902	chrI	3121749	3121900	putative_enhancer	transcription_initiation	transcription_initiation	.	.	.	.	.	.	.	.	3121847	3121755	3121845	3121753	True	True	False	False	False	False	False	False	False	False	False	False	False	False	False	True	False	False	False	False	False	False	False	False	False	False	False	False	False
chrI	3122057	3122208	chrI	3122055	3122206	putative_enhancer	transcription_initiation	transcription_initiation	.	.	.	.	.	.	.	.	3122231	3122150	3122229	3122148	True	True	False	False	False	False	False	False	False	False	False	False	False	False	False	False	False	False	False	False	False	False	False	False	False	False	False	False	False
chrI	3123715	3123866	chrI	3123713	3123864	putative_enhancer	transcription_initiation	no_transcription	.	.	.	.	.	.	.	.	3123839	3123730	3123837	3123728	True	False	False	False	False	False	False	False	False	False	False	False	False	False	False	False	False	False	False	False	False	False	False	False	False	False	False	False	False
chrI	3129734	3129885	chrI	3129732	3129883	putative_enhancer	no_transcription	transcription_initiation	.	.	.	.	.	.	.	.	3129869	3129737	3129867	3129735	False	True	False	False	False	False	False	False	False	False	False	False	False	False	False	False	False	False	False	False	False	False	False	False	False	False	False	False	False
chrI	3137053	3137204	chrI	3137051	3137202	coding_promoter	coding_promoter	no_transcription	WBGene00000626	col-49	protein_coding	.	.	.	.	.	3137194	3137068	3137192	3137066	True	False	False	False	False	False	True	True	True	False	False	False	False	False	False	False	False	False	True	True	False	False	False	False	False	False	False	False	False
chrI	3140605	3140756	chrI	3140603	3140754	coding_promoter	unassigned_promoter	coding_promoter	.	.	.	WBGene00045387	K09H9.8	protein_coding	.	.	3140753	3140577	3140751	3140575	True	True	False	False	True	False	False	False	False	False	False	False	False	False	False	True	False	False	False	False	False	False	False	True	False	True	True	True	True
chrI	3143151	3143302	chrI	3143149	3143300	coding_promoter	transcription_initiation	coding_promoter	.	.	.	WBGene00019597	K09H9.5	protein_coding	.	.	3143289	3143176	3143287	3143174	True	True	False	False	False	False	False	False	False	False	False	False	False	False	False	True	False	False	False	False	False	False	False	False	False	True	True	True	True
chrI	3147847	3147998	chrI	3147845	3147996	coding_promoter	coding_promoter	coding_promoter	WBGene00019595	K09H9.2	protein_coding	WBGene00003062	lpd-6	protein_coding	.	.	3147976	3147860	3147974	3147858	True	True	True	True	True	True	True	True	False	False	False	False	False	False	True	False	True	True	True	False	False	True	False	False	True	True	True	True	True
chrI	3148091	3148242	chrI	3148089	3148240	other_element	no_transcription	no_transcription	.	.	.	.	.	.	WBGene00019595	K09H9.2	3148226	3148106	3148224	3148104	False	False	False	False	False	False	False	False	False	False	False	False	False	False	False	False	False	False	False	False	False	False	False	False	False	False	False	False	False
chrI	3151342	3151493	chrI	3151340	3151491	putative_enhancer	transcription_initiation	transcription_initiation	.	.	.	.	.	.	WBGene00006888,WBGene00019598	K09H9.7,vbh-1	3151486	3151365	3151484	3151363	True	True	False	False	False	False	False	False	False	False	False	False	False	False	False	False	False	False	False	False	False	False	False	False	True	False	True	True	False
chrI	3152117	3152268	chrI	3152115	3152266	coding_promoter	coding_promoter	coding_promoter	WBGene00019594	K09H9.1	protein_coding	WBGene00019598	K09H9.7	protein_coding	.	.	3152212	3152090	3152210	3152088	True	True	False	False	False	False	False	False	False	False	False	False	False	False	False	False	False	True	False	False	False	False	False	False	True	True	True	True	True
chrI	3152489	3152640	chrI	3152487	3152638	coding_promoter	coding_promoter	transcription_initiation	WBGene00019594	K09H9.1	protein_coding	.	.	.	.	.	3152555	3152603	3152553	3152601	True	True	False	False	False	False	False	False	False	False	False	False	False	True	False	False	False	False	False	False	False	False	False	False	False	False	False	False	False
chrI	3154658	3154809	chrI	3154656	3154807	putative_enhancer	no_transcription	transcription_initiation	.	.	.	.	.	.	WBGene00006888,WBGene00019594	K09H9.1,vbh-1	3154793	3154635	3154791	3154633	False	True	False	False	False	False	False	False	False	False	False	False	False	False	False	False	False	False	True	False	False	False	False	False	False	False	False	False	False
chrI	3156731	3156882	chrI	3156729	3156880	putative_enhancer	no_transcription	transcription_initiation	.	.	.	.	.	.	WBGene00006888	vbh-1	3156866	3156745	3156864	3156743	False	True	False	False	False	False	False	False	False	False	False	False	False	False	False	False	False	False	False	False	False	False	False	False	False	False	False	False	False
chrI	3158358	3158509	chrI	3158356	3158507	putative_enhancer	no_transcription	transcription_initiation	.	.	.	.	.	.	WBGene00006888	vbh-1	3158493	3158322	3158491	3158320	False	True	False	False	False	False	False	False	False	False	False	False	False	False	False	False	False	False	False	False	False	False	False	False	False	False	False	False	False
chrI	3158745	3158896	chrI	3158743	3158894	putative_enhancer	transcription_initiation	no_transcription	.	.	.	.	.	.	WBGene00006888	vbh-1	3158714	3158760	3158712	3158758	True	False	False	False	False	False	False	False	False	False	False	False	False	False	False	False	False	False	False	False	False	False	False	False	False	False	False	False	False
chrI	3162537	3162688	chrI	3162535	3162686	coding_promoter	coding_promoter	coding_promoter	WBGene00021829	mrpl-17	protein_coding	WBGene00006888	vbh-1	protein_coding	.	.	3162731	3162524	3162729	3162522	True	True	True	True	True	True	True	True	True	True	True	True	True	False	True	True	True	True	True	True	True	True	False	True	True	True	True	True	True
chrI	3176524	3176675	chrI	3176522	3176673	putative_enhancer	transcription_initiation	transcription_initiation	.	.	.	.	.	.	WBGene00021831	Y54E10A.11	3176652	3176550	3176650	3176548	True	True	False	False	False	False	False	False	False	False	False	False	False	False	False	False	False	False	False	False	False	False	False	False	True	False	True	False	False
chrI	3192543	3192694	chrI	3192541	3192692	putative_enhancer	transcription_initiation	transcription_initiation	.	.	.	.	.	.	WBGene00021831	Y54E10A.11	3192559	3192729	3192557	3192727	True	True	False	False	False	False	False	False	False	False	False	False	False	False	False	False	False	False	True	False	False	False	False	False	False	False	False	False	False
chrI	3192681	3192832	chrI	3192679	3192830	coding_promoter	transcription_initiation	coding_promoter	.	.	.	WBGene00021831	Y54E10A.11	protein_coding	.	.	3192829	3192729	3192827	3192727	True	True	False	False	False	False	False	False	False	False	False	False	False	False	False	False	False	False	False	False	False	False	False	False	False	False	False	False	False
chrI	3194864	3195015	chrI	3194862	3195013	putative_enhancer	transcription_initiation	transcription_initiation	.	.	.	.	.	.	WBGene00021832	Y54E10A.12	3194935	3194885	3194933	3194883	True	True	False	False	False	False	False	False	False	False	False	False	False	False	False	False	False	False	False	False	False	False	False	False	False	False	False	False	False
chrI	3195955	3196106	chrI	3195953	3196104	putative_enhancer	transcription_initiation	no_transcription	.	.	.	.	.	.	WBGene00021832	Y54E10A.12	3196052	3195970	3196050	3195968	True	False	False	False	False	False	False	False	False	False	False	False	False	False	False	False	False	False	False	False	False	True	False	False	False	False	False	False	False
chrI	3198968	3199119	chrI	3198966	3199117	coding_promoter	transcription_initiation	coding_promoter	.	.	.	WBGene00021832	Y54E10A.12	protein_coding	.	.	3199147	3198983	3199145	3198981	True	False	False	False	False	False	False	False	False	False	False	False	False	False	False	False	False	False	False	False	False	False	False	False	True	True	True	True	True
chrI	3205123	3205274	chrI	3205121	3205272	coding_promoter	coding_promoter	transcription_initiation	WBGene00021835	Y54E10A.17	protein_coding	.	.	.	.	.	3205248	3205150	3205246	3205148	True	True	False	True	True	True	True	False	False	False	False	False	False	False	True	True	True	True	False	False	False	False	True	False	False	False	False	False	False
chrI	3205457	3205608	chrI	3205455	3205606	other_element	no_transcription	no_transcription	.	.	.	.	.	.	WBGene00021835	Y54E10A.17	3205592	3205472	3205590	3205470	False	False	False	False	False	False	False	False	False	False	False	False	False	False	False	False	False	False	False	False	False	False	False	False	False	False	False	False	False
chrI	3206478	3206629	chrI	3206476	3206627	coding_promoter	coding_promoter	transcription_initiation	WBGene00021835	Y54E10A.17	protein_coding	.	.	.	.	.	3206576	3206474	3206574	3206472	True	True	True	False	True	True	True	True	True	True	True	True	False	False	False	False	False	False	True	False	True	True	True	False	False	False	False	False	False
chrI	3207790	3207941	chrI	3207788	3207939	putative_enhancer	no_transcription	transcription_initiation	.	.	.	.	.	.	WBGene00021835	Y54E10A.17	3207925	3207849	3207923	3207847	False	True	True	False	True	True	True	True	True	True	True	True	True	False	False	False	False	False	True	False	True	False	False	False	False	False	False	False	False
chrI	3210403	3210554	chrI	3210401	3210552	coding_promoter	coding_promoter	no_transcription	WBGene00001481	fog-1	protein_coding	.	.	.	.	.	3210538	3210418	3210536	3210416	False	False	False	False	False	False	False	False	False	False	False	False	False	False	False	False	False	True	False	False	False	False	False	False	False	False	False	False	False
chrI	3212428	3212579	chrI	3212426	3212577	other_element	no_transcription	no_transcription	.	.	.	.	.	.	WBGene00001481	fog-1	3212563	3212443	3212561	3212441	False	False	False	False	False	False	False	False	False	False	False	False	False	False	False	False	False	False	False	False	False	False	False	False	False	False	False	False	False
chrI	3216838	3216989	chrI	3216836	3216987	other_element	no_transcription	no_transcription	.	.	.	.	.	.	WBGene00001481	fog-1	3216973	3216853	3216971	3216851	False	False	False	False	False	False	False	False	False	False	False	False	False	False	False	False	False	False	False	False	False	False	False	False	False	False	False	False	False
chrI	3218826	3218977	chrI	3218824	3218975	putative_enhancer	transcription_initiation	transcription_initiation	.	.	.	.	.	.	WBGene00004404	rom-5	3218949	3218873	3218947	3218871	True	True	False	False	False	False	False	False	False	False	False	False	False	False	False	False	False	False	False	False	False	False	False	False	False	False	False	False	False
chrI	3222774	3222925	chrI	3222772	3222923	putative_enhancer	transcription_initiation	transcription_initiation	.	.	.	.	.	.	WBGene00004404	rom-5	3222905	3222876	3222903	3222874	True	True	False	False	False	False	False	False	False	False	False	False	False	False	False	False	False	False	False	False	False	False	False	False	False	False	False	False	False
chrI	3223002	3223153	chrI	3223000	3223151	coding_promoter	no_transcription	coding_promoter	.	.	.	WBGene00004404	rom-5	protein_coding	.	.	3223137	3223059	3223135	3223057	False	True	False	False	False	False	False	False	False	False	False	False	False	False	False	False	False	False	False	False	False	False	False	False	True	True	True	True	True
chrI	3228023	3228174	chrI	3228021	3228172	coding_promoter	unassigned_promoter	coding_promoter	.	.	.	WBGene00000413	cdt-1	protein_coding	.	.	3228155	3228043	3228153	3228041	True	True	True	True	True	True	True	True	True	False	True	False	True	True	False	True	True	True	True	True	False	True	True	True	True	True	True	True	True
chrI	3246257	3246408	chrI	3246255	3246406	putative_enhancer	transcription_initiation	transcription_initiation	.	.	.	.	.	.	WBGene00003258,WBGene00021834	cogc-1,mab-31	3246407	3246289	3246405	3246287	True	True	False	False	False	False	False	False	False	False	False	False	False	False	False	False	False	False	False	False	False	False	False	False	False	False	False	False	False
chrI	3246547	3246698	chrI	3246545	3246696	putative_enhancer	transcription_initiation	transcription_initiation	.	.	.	.	.	.	WBGene00003258,WBGene00021834	cogc-1,mab-31	3246728	3246552	3246726	3246550	True	True	False	False	False	False	False	False	False	False	False	False	False	False	False	False	False	False	False	False	False	False	False	False	False	False	False	False	False
chrI	3247098	3247249	chrI	3247096	3247247	putative_enhancer	transcription_initiation	transcription_initiation	.	.	.	.	.	.	WBGene00003258,WBGene00021834	cogc-1,mab-31	3247230	3247116	3247228	3247114	True	True	False	False	False	False	False	False	False	False	False	False	False	False	False	False	False	False	False	False	False	False	False	False	False	False	False	False	False
chrI	3247419	3247570	chrI	3247417	3247568	putative_enhancer	transcription_initiation	transcription_initiation	.	.	.	.	.	.	WBGene00003258,WBGene00021834	cogc-1,mab-31	3247595	3247428	3247593	3247426	True	True	False	False	False	False	False	False	False	False	False	False	False	False	False	False	False	False	False	False	False	False	False	False	False	False	False	False	False
chrI	3247899	3248050	chrI	3247897	3248048	putative_enhancer	transcription_initiation	transcription_initiation	.	.	.	.	.	.	WBGene00003258,WBGene00021834	cogc-1,mab-31	3248057	3247911	3248055	3247909	True	True	False	False	False	False	False	False	False	False	False	False	False	False	False	False	False	False	False	False	False	False	False	False	False	False	False	False	False
[truncated: 41,075 more rows]
[truncated: 17 more columns]
