# Supplementary material for: Chromatin accessibility dynamics across C. elegans development and ageing
Source: eLife journal article supplement (doi:10.7554/elife.37344), 2018-10-26

Figure 4 - figure supplement 1

## Developmental promoter clusters - (continued in Figure 4 - figure supplement 2)

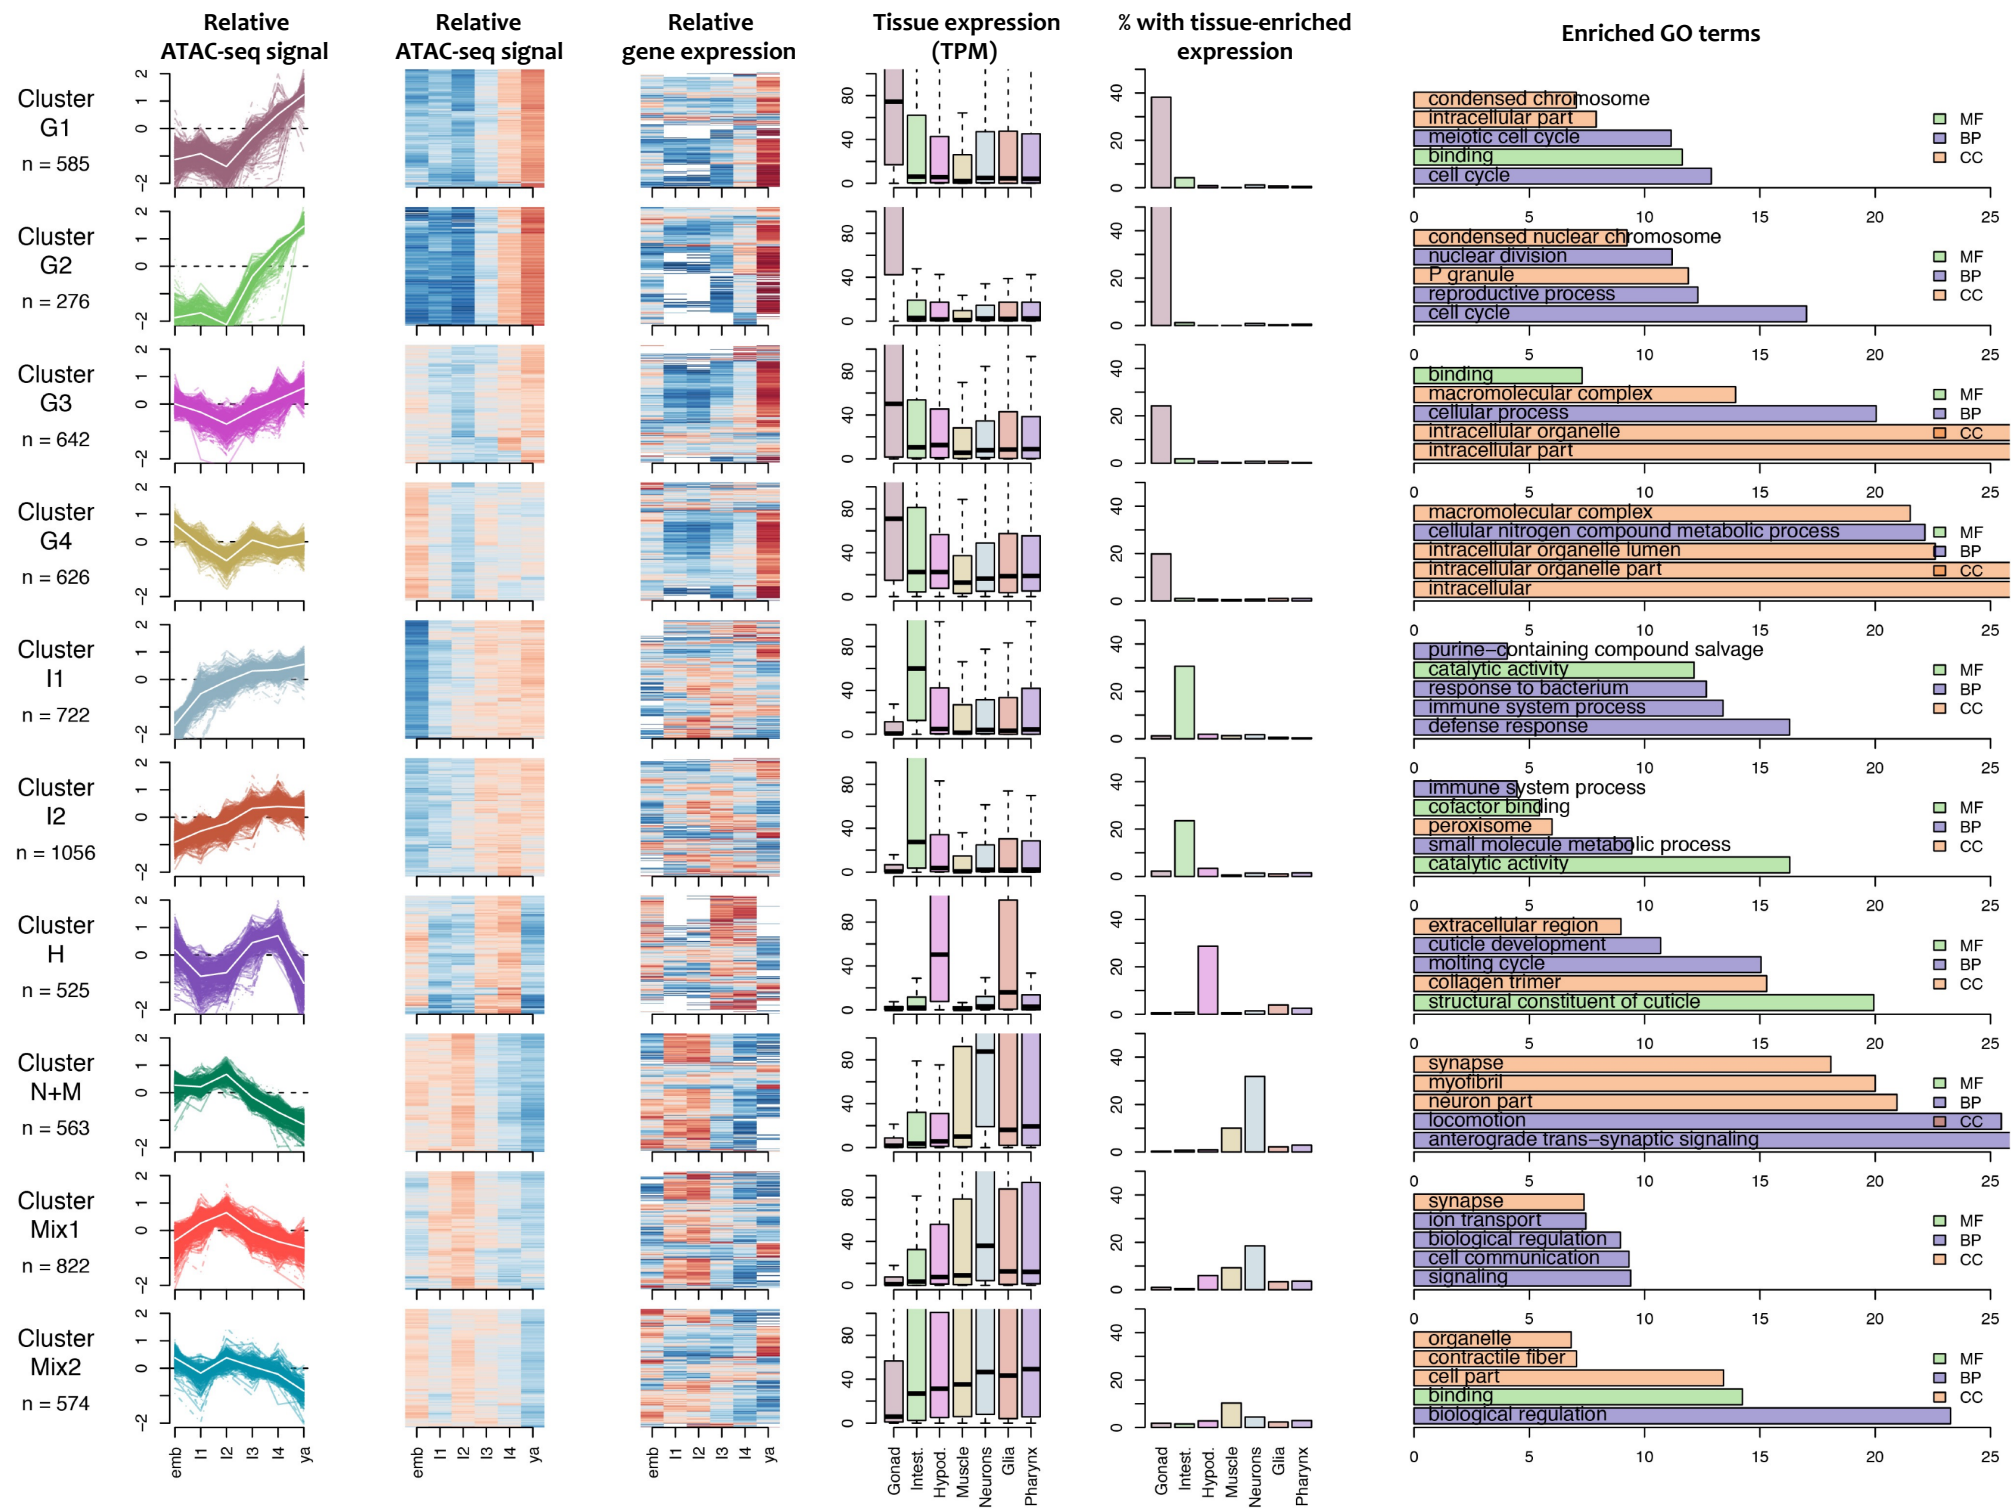

Supplement: supp [file elife-37344-supp-v1.zip › elife_poa_e37344_Figure_4_figure_supplement_1.pdf]
