# Supplementary material for: Chromatin accessibility dynamics across C. elegans development and ageing
Source: eLife journal article supplement (doi:10.7554/elife.37344), 2018-10-26
Supplement: supp [file elife-37344-supp-v1.zip › elife_poa_e37344_Figure_4_source_data_1.txt]

chrom_ce10	start_ce10	end_ce10	devel_is_dynamic	ageing_is_dynamic	devel_prom_cluster_label	ageing_prom_cluster_label	HOTness	factor_count	factor_names
chrI	1900	2051	True	False	.	.	none	0	.
chrI	3826	3977	True	False	.	.	HOT	92	B0035.1,B0261.1,C16A3.4,C34F6.9,F13H6.1,F23B12.7,F37D6.2,F49E8.2,F52B5.7,T07F8.4,T26A5.8,ZK546.5,aha-1,atf-7,athp-1,blmp-1,cebp-1,ceh-28,ceh-31,ceh-82,crh-2,daf-16,dao-5,die-1,dpl-1,dsc-1,duxl-1,dve-1,efl-1,egl-13,elt-1,elt-2,elt-3,eor-1,fkh-8,fos-1,hif-1,him-1,hlh-1,hlh-30,hlh-4,irx-1,jun-1,let-607,lin-35,lir-3,lsy-12,lsy-2,madf-10,mdl-1,mls-2,nfya-1,nhr-102,nhr-12,nhr-20,nhr-21,nhr-23,nhr-25,nh…
chrI	4276	4427	True	False	.	.	none	0	.
chrI	11272	11423	True	False	I1	stable	cold	14	atf-7,cebp-1,daf-16,dve-1,elt-2,hlh-30,let-607,lsy-12,nhr-71,nhr-80,pqm-1,snpc-4,zip-8,ztf-18
chrI	13070	13221	True	False	.	.	cold	2	nhr-90,repo-1
chrI	15430	15581	True	False	.	.	cold	11	ceh-28,crh-2,daf-16,dve-1,elt-2,eor-1,fos-1,nhr-80,pha-4,pqm-1,ztf-18
chrI	15722	15873	True	False	.	.	cold	2	snpc-1.1,snpc-4
chrI	16958	17109	True	False	.	.	HOT	124	B0035.1,C04F5.9,C16A3.4,C34F6.9,F13H6.1,F22D6.2,F23B12.7,F37D6.2,F52B5.7,M03D4.4,R02D3.7,T07F8.4,T26A5.8,ZK546.5,aha-1,aly-2,atf-7,athp-1,blmp-1,cebp-1,ceh-14,ceh-16,ceh-18,ceh-28,ceh-30,ceh-31,ceh-32,ceh-34,ceh-48,ceh-79,ceh-82,ceh-90,ces-1,cog-1,crh-2,daf-16,dao-5,die-1,dmd-4,dpff-1,dpl-1,dsc-1,duxl-1,dve-1,efl-1,egl-13,egl-5,elt-1,elt-2,elt-3,eor-1,ets-4,fkh-10,fkh-8,fos-1,hif-1,him-1,hlh-1,hl…
chrI	22266	22417	True	False	.	.	cold	14	cebp-1,dsc-1,efl-1,eor-1,let-607,lsy-2,nhr-47,nhr-71,nhr-90,rbr-2,snpc-4,snu-23,swsn-7,ztf-18
chrI	22895	23046	False	False	.	.	none	0	.
chrI	24452	24603	False	True	.	.	none	0	.
chrI	26902	27053	True	False	I2	stable	HOT	88	C04F5.9,C16A3.4,C34F6.9,F13H6.1,F23B12.7,F37D6.2,ahr-1,cebp-1,ceh-14,ceh-18,ceh-2,ceh-31,ceh-34,ceh-82,ceh-90,ces-1,che-1,cog-1,crh-2,daf-16,dpl-1,dsc-1,dve-1,efl-1,egl-13,egl-5,elt-1,elt-2,elt-3,eor-1,ets-4,ets-7,fax-1,fkh-10,fkh-8,fos-1,hif-1,him-1,hlh-15,hlh-30,hlh-8,irx-1,jun-1,let-607,lim-6,lin-35,lir-3,lsy-2,madf-10,mdl-1,mef-2,mls-2,nfya-1,nhr-20,nhr-21,nhr-23,nhr-25,nhr-47,nhr-71,nhr-85,n…
chrI	27082	27233	True	False	.	.	HOT	93	C04F5.9,C16A3.4,C34F6.9,F13H6.1,F23B12.7,F37D6.2,ahr-1,atf-7,cebp-1,ceh-14,ceh-18,ceh-2,ceh-31,ceh-34,ceh-82,ceh-90,ces-1,che-1,cog-1,crh-2,daf-16,dpl-1,dsc-1,dve-1,efl-1,egl-13,egl-5,elt-1,elt-2,elt-3,eor-1,ets-4,ets-7,fax-1,fkh-10,fkh-8,fos-1,hif-1,him-1,hlh-1,hlh-15,hlh-30,hlh-8,hmg-11,irx-1,jun-1,let-607,lim-6,lin-35,lir-3,lsy-2,madf-10,mdl-1,mef-2,mls-2,nfya-1,nhr-20,nhr-21,nhr-23,nhr-25,nhr…
chrI	28163	28314	True	False	.	.	none	0	.
chrI	30271	30422	False	False	.	.	none	0	.
chrI	31958	32109	False	False	.	.	none	0	.
chrI	33340	33491	False	False	.	.	cold	1	eor-1
chrI	33764	33915	True	False	.	.	cold	4	dve-1,lsy-2,pha-4,spr-1
chrI	34239	34390	False	False	.	.	none	0	.
chrI	34626	34777	False	False	.	.	cold	2	nhr-23,nhr-25
chrI	35381	35532	True	False	.	.	cold	16	C34F6.9,F13H6.1,ces-1,dsc-1,elt-1,eor-1,hmg-11,lin-35,lsy-2,nfya-1,nhr-71,rnt-1,snu-23,swsn-7,unc-42,unc-55
chrI	36018	36169	True	False	Mix8	stable	cold	1	nhr-80
chrI	36471	36622	True	False	.	.	cold	6	daf-16,dve-1,elt-2,fos-1,lsy-2,nhr-80
chrI	37988	38139	False	False	.	.	none	0	.
chrI	38986	39137	True	False	.	.	cold	10	crh-2,daf-16,dsc-1,dve-1,elt-2,fos-1,lsy-2,nhr-80,pqm-1,sma-9
chrI	39776	39927	True	False	.	.	HOT	46	C16A3.4,C34F6.9,F13H6.1,R02D3.7,blmp-1,cebp-1,ceh-18,ceh-31,ces-1,crh-2,dpl-1,dve-1,efl-1,egl-13,elt-3,eor-1,fkh-8,fos-1,hlh-30,hmg-11,lin-35,lir-3,lsy-2,nfya-1,nhr-20,nhr-21,nhr-23,nhr-25,nhr-47,nhr-71,nhr-80,nhr-85,pha-4,rbr-2,rnt-1,sem-4,skn-1,sma-9,snpc-4,snu-23,swsn-7,tbx-2,unc-42,unc-55,unc-86,xbp-1
chrI	40327	40478	True	False	.	.	cold	3	fkh-8,hlh-4,unc-55
chrI	40869	41020	True	False	.	.	cold	2	ceh-28,hif-1
chrI	41422	41573	True	False	.	.	cold	3	F13H6.1,eor-1,pha-4
chrI	42126	42277	True	True	I2	I	HOT	41	C34F6.9,F13H6.1,R02D3.7,blmp-1,cebp-1,crh-2,dpl-1,dve-1,efl-1,egl-5,elt-1,elt-2,elt-3,fos-1,hif-1,hlh-30,hmg-11,irx-1,lin-35,lsy-2,madf-10,mdl-1,nfya-1,nhr-20,nhr-23,nhr-25,nhr-48,nhr-71,nhr-80,nhr-85,nhr-90,pqm-1,rnt-1,sem-4,sma-3,sma-9,snu-23,swsn-7,unc-55,vab-15,xbp-1
chrI	42692	42843	False	False	.	.	none	0	.
chrI	43008	43159	False	True	.	.	cold	1	nhr-80
chrI	44817	44968	False	True	.	.	none	0	.
chrI	45122	45273	True	True	.	.	cold	2	let-607,nhr-80
chrI	46405	46556	False	False	.	.	none	0	.
chrI	46676	46827	False	False	.	.	cold	1	efl-1
chrI	47053	47204	True	False	G3	stable	cold	10	C34F6.9,ces-1,efl-1,lin-35,lsy-2,pha-4,snu-23,unc-42,unc-55,xnd-1
chrI	47460	47611	False	False	.	.	none	0	.
chrI	56726	56877	True	False	.	.	none	0	.
chrI	65751	65902	False	False	.	.	none	0	.
chrI	67780	67931	True	False	.	.	none	0	.
chrI	70044	70195	True	False	Mix2	stable	HOT	56	C04F5.9,C34F6.9,F13H6.1,cebp-1,ceh-14,ceh-18,ceh-2,ceh-31,ceh-34,ceh-82,ces-1,cog-1,crh-2,daf-16,dpl-1,dsc-1,dve-1,efl-1,egl-5,elt-2,elt-3,eor-1,fkh-8,fos-1,hlh-1,hlh-30,hlh-8,hmg-11,irx-1,jun-1,lin-35,lsy-2,mdl-1,nfya-1,nhr-20,nhr-23,nhr-25,nhr-47,nhr-71,nhr-80,nhr-90,pax-1,pha-4,pros-1,rbr-2,ref-2,rnt-1,sma-3,snpc-4,snu-23,swsn-7,tbx-2,unc-42,unc-55,unc-86,xbp-1
chrI	71234	71385	False	False	.	.	cold	1	ceh-34
chrI	71851	72002	False	False	.	.	none	0	.
chrI	72362	72513	True	False	G3	stable	none	0	.
chrI	74706	74857	True	True	.	.	cold	2	hlh-1,nhr-23
chrI	75217	75368	False	True	.	.	none	0	.
chrI	86364	86515	True	False	Mix6	stable	cold	1	ces-1
chrI	90438	90589	False	False	.	.	none	0	.
chrI	91353	91504	True	False	.	.	none	0	.
chrI	91714	91865	False	False	.	.	none	0	.
chrI	92221	92372	True	False	.	.	cold	1	efl-1
chrI	92875	93026	True	False	G1	stable	cold	3	efl-1,him-1,snpc-3.4
chrI	96523	96674	False	False	.	.	cold	4	ceh-90,crh-2,let-607,unc-55
chrI	98075	98226	False	False	.	.	none	0	.
chrI	108262	108413	True	False	Mix6	stable	HOT	29	C34F6.9,F13H6.1,ZK546.5,blmp-1,ceh-34,ces-1,cog-1,crh-2,dpl-1,efl-1,eor-1,hlh-30,hmg-11,lin-35,lsy-2,nfya-1,nhr-25,nhr-71,pax-1,pha-4,rbr-2,snu-23,swsn-7,tra-4,unc-55,unc-86,xbp-1,ztf-18,ztf-26
chrI	109603	109754	False	False	.	.	cold	2	atf-7,ceh-79
chrI	110120	110271	True	False	I2	stable	cold	12	daf-16,duxl-1,dve-1,eor-1,hlh-30,mdl-1,nhr-23,nhr-84,pha-4,snpc-4,snu-23,ztf-4
chrI	110331	110482	True	True	I2	Mix5	cold	6	cebp-1,duxl-1,eor-1,mdl-1,nhr-84,snpc-4
chrI	110635	110786	False	False	stable	stable	HOT	85	C04F5.9,C16A3.4,C34F6.9,F13H6.1,F23B12.7,F37D6.2,F49E8.2,M03D4.4,R02D3.7,ZK546.5,aly-2,athp-1,blmp-1,cebp-1,ceh-14,ceh-18,ceh-28,ceh-31,ceh-34,ceh-82,ces-1,cog-1,crh-2,daf-16,dpl-1,dsc-1,dve-1,efl-1,egl-5,elt-2,elt-3,ets-4,fkh-10,fkh-8,fos-1,hif-1,hlh-1,hlh-30,hmg-11,jun-1,let-607,lin-35,lir-3,lsy-12,lsy-2,madf-10,madf-2,mdl-1,nfya-1,nhr-20,nhr-21,nhr-23,nhr-25,nhr-47,nhr-71,nhr-80,nhr-85,nhr-90,…
chrI	111206	111357	True	False	.	.	cold	4	F49E8.2,cebp-1,efl-1,mxl-1
chrI	112379	112530	True	False	.	.	cold	7	F49E8.2,him-1,lsy-2,nhr-90,repo-1,snpc-3.4,unc-130
chrI	112713	112864	True	False	.	.	cold	1	ceh-28
chrI	114694	114845	True	False	.	.	cold	1	efl-1
chrI	122407	122558	True	False	Mix2	stable	cold	4	ceh-34,ets-4,pha-4,ref-2
chrI	123900	124051	True	False	.	.	none	0	.
chrI	124768	124919	True	True	.	.	cold	4	M03D4.4,cebp-1,sptf-1,unc-55
chrI	126632	126783	True	False	Mix6	stable	none	0	.
chrI	128237	128388	True	False	G1	stable	cold	7	F49E8.2,efl-1,him-1,lsy-2,snpc-3.4,unc-130,xnd-1
chrI	128403	128554	True	False	Mix7	stable	cold	6	F49E8.2,efl-1,lsy-2,snpc-3.4,unc-130,xnd-1
chrI	128676	128827	True	False	.	.	none	0	.
chrI	129895	130046	True	False	.	.	cold	1	dsc-1
chrI	130436	130587	True	False	.	.	cold	8	ces-1,dsc-1,mls-2,rnt-1,snu-23,unc-130,unc-42,vab-15
chrI	130843	130994	True	False	.	.	cold	2	mls-2,sptf-1
chrI	134015	134166	True	False	.	.	cold	2	atf-7,athp-1
chrI	134218	134369	True	False	Mix7	stable	cold	6	F52B5.7,T26A5.8,atf-7,athp-1,rec-8,unc-130
chrI	144716	144867	True	False	.	.	none	0	.
chrI	153759	153910	True	False	.	.	none	0	.
chrI	154098	154249	False	False	.	.	cold	2	daf-16,pha-4
chrI	156031	156182	False	False	.	.	cold	2	eor-1,nhr-23
chrI	159357	159508	True	False	.	.	cold	6	blmp-1,ceh-28,elt-3,nhr-25,pag-3,zip-8
chrI	160122	160273	True	False	.	.	cold	5	elt-1,eor-1,nhr-20,pha-4,snu-23
chrI	160806	160957	False	False	.	.	none	0	.
chrI	165888	166039	False	False	.	.	cold	2	blmp-1,nhr-25
chrI	166970	167121	True	False	H	stable	cold	1	snu-23
chrI	168012	168163	True	False	.	.	cold	1	zip-8
chrI	168681	168832	False	True	.	.	cold	1	elt-3
chrI	169733	169884	True	False	Mix6	stable	none	0	.
chrI	170648	170799	True	False	.	.	none	0	.
chrI	171122	171273	True	False	I1	stable	cold	5	elt-2,mdl-1,nhr-80,pha-4,pqm-1
chrI	171775	171926	True	False	.	.	cold	2	elt-1,snu-23
chrI	172087	172238	False	False	.	.	none	0	.
chrI	172376	172527	True	True	I2	Mix4	none	0	.
chrI	172819	172970	True	True	.	.	cold	3	cebp-1,elt-3,pag-3
chrI	173207	173358	True	True	Mix6	Mix3	cold	1	zip-8
chrI	176780	176931	True	True	.	.	none	0	.
chrI	177363	177514	True	False	I2	stable	cold	3	elt-3,hlh-30,sma-3
chrI	178073	178224	True	False	.	.	none	0	.
chrI	178419	178570	True	False	.	.	none	0	.
chrI	179271	179422	True	False	.	.	cold	2	nhr-23,nhr-25
chrI	180176	180327	False	False	stable	stable	cold	7	eor-1,fos-1,lsy-2,nhr-23,nhr-25,snu-23,xnd-1
chrI	182144	182295	False	False	.	.	none	0	.
chrI	182927	183078	True	False	G4	stable	HOT	48	C16A3.4,C34F6.9,F49E8.2,R02D3.7,cebp-1,ceh-28,ceh-82,ceh-90,ces-1,crh-2,dpl-1,dsc-1,efl-1,elt-3,eor-1,fkh-8,fos-1,him-1,hlh-30,hmg-11,irx-1,jun-1,lin-35,lsy-2,mdl-1,mls-2,nfya-1,nhr-20,nhr-23,nhr-25,nhr-47,nhr-71,nhr-90,pha-4,rbr-2,rnt-1,sma-3,sma-9,snpc-3.4,snpc-4,snu-23,swsn-7,tbx-2,unc-130,unc-55,unc-86,xbp-1,xnd-1
chrI	183261	183412	False	False	stable	stable	none	0	.
chrI	183416	183567	False	False	.	.	none	0	.
chrI	184785	184936	True	True	.	.	cold	1	rpc-1
chrI	188566	188717	True	False	.	.	none	0	.
chrI	196825	196976	True	False	.	.	cold	1	rpc-1
chrI	202163	202314	True	False	.	.	none	0	.
chrI	204401	204552	True	True	.	.	none	0	.
chrI	206007	206158	False	False	.	.	cold	2	ceh-36,rpc-1
chrI	215667	215818	True	False	.	.	cold	1	xnd-1
chrI	215836	215987	True	False	G2	stable	cold	1	xnd-1
chrI	217734	217885	True	False	Mix8	stable	none	0	.
chrI	226835	226986	True	False	.	.	none	0	.
chrI	230511	230662	True	False	.	.	cold	1	sptf-1
chrI	231335	231486	True	False	.	.	none	0	.
chrI	231966	232117	False	False	.	.	cold	1	aly-1
chrI	232644	232795	False	False	.	.	none	0	.
chrI	237724	237875	True	False	.	.	none	0	.
chrI	238032	238183	False	False	.	.	cold	1	sptf-1
chrI	238435	238586	False	False	.	.	none	0	.
chrI	240340	240491	True	False	.	.	none	0	.
chrI	240779	240930	True	False	.	.	none	0	.
chrI	251745	251896	True	False	.	.	cold	2	efl-1,xnd-1
chrI	251910	252061	True	False	G2	stable	cold	2	efl-1,xnd-1
chrI	257942	258093	True	False	.	.	cold	1	zip-8
chrI	258518	258669	False	False	.	.	none	0	.
chrI	260242	260393	True	False	.	.	none	0	.
chrI	260864	261015	True	False	.	.	cold	1	blmp-1
chrI	262026	262177	True	False	.	.	none	0	.
chrI	262814	262965	False	False	.	.	none	0	.
chrI	267240	267391	True	False	Mix8	stable	none	0	.
chrI	268137	268288	True	False	.	.	none	0	.
chrI	270330	270481	True	False	.	.	cold	1	ceh-34
chrI	270973	271124	True	False	.	.	cold	4	hlh-1,hlh-30,snu-23,unc-55
chrI	272558	272709	True	False	.	.	cold	1	ces-1
chrI	273598	273749	True	False	.	.	cold	3	ces-1,lim-6,unc-42
chrI	274470	274621	True	False	.	.	cold	1	ces-1
chrI	275718	275869	True	False	.	.	cold	2	ceh-31,ces-1
chrI	276570	276721	True	False	.	.	none	0	.
chrI	277106	277257	True	False	Mix4	stable	cold	5	ces-1,rbr-2,sma-9,sptf-1,unc-42
chrI	278092	278243	False	False	.	.	none	0	.
chrI	279892	280043	False	False	stable	stable	cold	1	rbr-2
chrI	280353	280504	False	False	.	.	none	0	.
chrI	282027	282178	True	False	Mix3	stable	none	0	.
chrI	287791	287942	True	False	.	.	none	0	.
chrI	288130	288281	True	False	.	.	cold	5	F49E8.2,efl-1,him-1,lsy-2,xnd-1
chrI	289111	289262	False	False	stable	stable	HOT	43	C16A3.4,C34F6.9,F13H6.1,aly-2,cebp-1,ceh-28,ceh-48,ceh-82,ces-1,crh-2,dpl-1,dsc-1,efl-1,elt-3,eor-1,fkh-8,fos-1,hlh-30,hmg-11,jun-1,lin-35,lsy-2,nfya-1,nhr-20,nhr-21,nhr-23,nhr-25,nhr-47,nhr-71,nhr-90,pha-4,rbr-2,rnt-1,sma-3,snu-23,sptf-1,swsn-7,unc-130,unc-42,unc-55,unc-86,xbp-1,ztf-16
chrI	290377	290528	False	False	.	.	cold	2	pha-4,snu-23
chrI	293197	293348	True	False	Mix4	stable	cold	3	hlh-1,rnt-1,unc-55
chrI	295960	296111	True	False	.	.	cold	4	eor-1,hlh-1,rnt-1,unc-55
chrI	296237	296388	True	False	.	.	cold	9	C34F6.9,egl-13,eor-1,fkh-8,nhr-47,nhr-71,unc-55,unc-86,ztf-11
chrI	297434	297585	True	False	.	.	cold	3	ces-1,lin-35,unc-55
chrI	297619	297770	True	False	.	.	cold	2	ces-1,lin-35
chrI	298430	298581	True	False	.	.	cold	4	elt-1,eor-1,nhr-25,snu-23
chrI	299772	299923	True	False	.	.	cold	16	C34F6.9,blmp-1,ces-1,crh-2,egl-13,eor-1,fkh-8,hmg-11,lin-35,lsy-2,mdl-1,nhr-23,nhr-25,nhr-71,snu-23,unc-55
chrI	300739	300890	False	False	.	.	none	0	.
chrI	301309	301460	False	False	.	.	none	0	.
chrI	301548	301699	False	False	.	.	none	0	.
chrI	302102	302253	True	False	Mix1	stable	none	0	.
chrI	305684	305835	False	False	.	.	none	0	.
chrI	305916	306067	False	False	.	.	none	0	.
chrI	308035	308186	False	False	.	.	none	0	.
chrI	308884	309035	False	False	.	.	none	0	.
chrI	310902	311053	True	False	.	.	HOT	26	F52B5.7,F57C9.4,atf-7,athp-1,cebp-1,daf-16,die-1,dve-1,elt-2,eor-1,let-607,lin-35,lsy-2,madf-10,nfya-1,nhr-102,nhr-80,nhr-90,pqm-1,ref-2,rnt-1,snpc-3.4,snpc-4,snu-23,tbx-2,unc-62
chrI	311293	311444	True	False	.	.	cold	1	F49E8.2
chrI	314281	314432	False	False	.	.	none	0	.
chrI	315227	315378	False	False	stable	stable	HOT	106	B0035.1,B0261.1,C04F5.9,C16A3.4,C34F6.9,F13H6.1,F22D6.2,F23B12.7,F37D6.2,F49E8.2,F52B5.7,M03D4.4,R02D3.7,ZK546.5,aha-1,aly-2,atf-7,athp-1,blmp-1,cebp-1,ceh-18,ceh-28,ceh-31,ceh-34,ceh-48,ceh-82,ceh-90,ces-1,cog-1,crh-2,daf-16,dpl-1,dsc-1,duxl-1,dve-1,efl-1,egl-13,egl-5,elt-1,elt-2,elt-3,eor-1,ets-4,fkh-10,fkh-8,fos-1,hif-1,hlh-1,hlh-30,irx-1,jun-1,let-607,lin-35,lir-3,lsy-12,lsy-2,madf-10,madf-2,…
chrI	315487	315638	True	False	.	.	cold	3	ceh-28,daf-16,pha-4
chrI	316147	316298	True	False	.	.	HOT	40	C16A3.4,F37D6.2,F49E8.2,athp-1,cebp-1,ces-1,crh-2,dpl-1,dsc-1,dve-1,efl-1,elt-2,eor-1,fkh-8,hif-1,hlh-30,let-607,lin-35,lir-3,lsy-2,madf-10,nfya-1,nhr-21,nhr-23,nhr-47,nhr-71,nhr-80,nhr-90,rbr-2,ref-2,rnt-1,sma-3,snpc-4,snu-23,swsn-7,unc-130,unc-55,unc-86,xnd-1,ztf-18
chrI	316681	316832	False	False	.	.	cold	1	rbr-2
chrI	318178	318329	False	False	.	.	cold	1	lsy-2
chrI	321003	321154	False	False	stable	stable	none	0	.
chrI	323569	323720	True	False	G4	stable	HOT	32	C04F5.9,C34F6.9,F13H6.1,cebp-1,ces-1,crh-2,dpl-1,dsc-1,efl-1,egl-13,elt-3,eor-1,fkh-8,hif-1,hmg-11,irx-1,lin-35,lsy-2,nfya-1,nhr-20,nhr-47,nhr-71,nhr-85,pha-4,sma-3,snu-23,swsn-7,ttx-3,unc-55,unc-86,xbp-1,xnd-1
chrI	335039	335190	True	False	.	.	none	0	.
chrI	342946	343097	False	False	.	.	cold	7	dpl-1,efl-1,lin-35,lsy-2,snu-23,unc-55,xnd-1
chrI	347231	347382	True	False	G2	stable	cold	5	efl-1,lsy-2,snpc-3.4,unc-130,xnd-1
chrI	347475	347626	True	False	G1	stable	cold	1	efl-1
chrI	348358	348509	False	False	stable	stable	cold	7	dpl-1,efl-1,eor-1,lin-35,lsy-2,pha-4,unc-55
chrI	354499	354650	False	False	.	.	cold	1	ceh-28
chrI	363984	364135	True	False	.	.	cold	2	F49E8.2,unc-130
chrI	364271	364422	True	False	G2	stable	cold	7	F49E8.2,athp-1,efl-1,lsy-2,snpc-3.4,unc-130,xnd-1
chrI	377324	377475	False	False	.	.	none	0	.
chrI	378953	379104	False	False	.	.	HOT	35	B0035.1,F49E8.2,F52B5.7,R02D3.7,aly-1,aly-2,atf-7,athp-1,cebp-1,ceh-79,crh-2,daf-16,die-1,elt-2,hif-1,let-607,lsy-12,lsy-2,madf-10,nhr-102,nhr-21,nhr-25,nhr-47,nhr-71,nhr-90,pha-4,rec-8,sma-3,snpc-3.4,snpc-4,unc-130,xnd-1,zfp-2,zip-8,ztf-18
chrI	381581	381732	True	False	.	.	cold	15	F49E8.2,cebp-1,ces-1,daf-16,eor-1,hlh-30,lsy-2,madf-10,mdl-1,nhr-80,nhr-90,pha-4,rnt-1,snu-23,ztf-26
chrI	381912	382063	True	False	.	.	cold	2	hlh-30,lsy-2
chrI	382446	382597	False	False	stable	stable	HOT	98	C04F5.9,C16A3.4,C34F6.9,F13H6.1,F23B12.7,F37D6.2,F49E8.2,M03D4.4,R02D3.7,ZK546.5,aha-1,aly-2,athp-1,blmp-1,cebp-1,ceh-18,ceh-28,ceh-31,ceh-34,ceh-82,ces-1,che-1,cog-1,crh-2,daf-16,die-1,dpl-1,dsc-1,duxl-1,dve-1,efl-1,egl-13,egl-5,elt-2,elt-3,ets-4,ets-7,fkh-10,fkh-8,fos-1,hif-1,him-1,hlh-1,hlh-30,hmg-11,irx-1,jun-1,let-607,lin-35,lsy-12,lsy-2,madf-10,madf-2,mdl-1,mef-2,mls-2,nfya-1,nhr-10,nhr-102…
chrI	382794	382945	False	False	.	.	cold	9	T26A5.8,cebp-1,ceh-48,die-1,elt-2,eor-1,hmg-11,mls-2,pha-2
chrI	389663	389814	False	False	.	.	none	0	.
chrI	390631	390782	False	False	.	.	none	0	.
chrI	395264	395415	True	False	Mix2	stable	HOT	26	C34F6.9,cebp-1,ceh-28,dve-1,efl-1,eor-1,fkh-8,fos-1,hlh-1,hlh-30,hmg-11,lin-35,lsy-2,mdl-1,nfya-1,nhr-20,nhr-23,nhr-25,nhr-47,nhr-71,nhr-80,pha-4,snu-23,swsn-7,tbx-2,unc-55
chrI	395972	396123	True	False	.	.	cold	3	daf-16,dve-1,zip-8
chrI	397844	397995	True	False	Mix2	stable	HOT	111	B0035.1,C04F5.9,C16A3.4,C34F6.9,F13H6.1,F22D6.2,F37D6.2,M03D4.4,R02D3.7,ZK546.5,aha-1,aly-1,atf-7,athp-1,blmp-1,cebp-1,ceh-14,ceh-18,ceh-2,ceh-22,ceh-28,ceh-30,ceh-31,ceh-32,ceh-34,ceh-36,ceh-48,ceh-82,ces-1,cog-1,crh-2,daf-16,die-1,dpl-1,dsc-1,duxl-1,dve-1,efl-1,egl-13,egl-5,elt-1,elt-2,eor-1,ets-4,ets-7,fkh-10,fkh-8,fos-1,gmeb-2,hif-1,hlh-1,hlh-30,hlh-8,hmg-11,irx-1,jun-1,let-607,lin-35,lsy-12,…
chrI	398466	398617	True	False	G1	stable	cold	3	him-1,lsy-2,xnd-1
chrI	400529	400680	True	True	.	.	cold	4	B0261.1,M03D4.4,rpc-1,sptf-1
chrI	414422	414573	True	False	.	.	none	0	.
chrI	418846	418997	True	False	Mix4	stable	cold	2	fkh-8,lin-35
chrI	419191	419342	False	False	.	.	none	0	.
chrI	424601	424752	True	False	.	.	cold	2	ceh-31,fkh-10
chrI	426921	427072	True	False	.	.	cold	1	eor-1
chrI	429221	429372	True	False	.	.	cold	10	blmp-1,eor-1,fos-1,hlh-30,nhr-21,nhr-23,nhr-25,nhr-85,snu-23,ztf-11
chrI	430213	430364	True	False	.	.	none	0	.
chrI	432129	432280	True	True	G1	I+H [1]	cold	2	B0261.1,rpc-1
chrI	432661	432812	True	False	.	.	none	0	.
chrI	433647	433798	False	False	.	.	HOT	29	C16A3.4,C34F6.9,F13H6.1,ceh-18,cog-1,daf-16,egl-5,eor-1,fos-1,hlh-1,hlh-30,lin-35,lir-3,lsy-2,nfya-1,nhr-20,nhr-47,nhr-71,nhr-80,pag-3,rnt-1,sma-3,sma-9,snu-23,syd-9,tbx-2,unc-130,unc-55,ztf-4
chrI	434613	434764	True	False	.	.	cold	15	dsc-1,dve-1,elt-2,elt-3,fos-1,hlh-30,irx-1,nhr-71,nhr-80,pha-4,pqm-1,rnt-1,sma-3,snu-23,unc-55
chrI	435542	435693	True	False	.	.	HOT	20	C34F6.9,F13H6.1,ceh-18,crh-2,daf-16,dsc-1,egl-5,hlh-30,lsy-2,nfya-1,nhr-47,nhr-71,rbr-2,rnt-1,sma-9,snu-23,swsn-7,unc-55,xbp-1,ztf-11
chrI	436161	436312	False	False	.	.	cold	1	nfya-1
chrI	436926	437077	True	False	.	.	cold	4	dsc-1,hlh-8,mls-2,sptf-1
chrI	437716	437867	True	False	.	.	cold	2	ceh-34,ceh-36
chrI	438129	438280	True	False	.	.	cold	4	dsc-1,hlh-1,hlh-8,sdc-2
chrI	439436	439587	True	False	.	.	none	0	.
chrI	440513	440664	True	False	.	.	cold	2	ceh-31,hlh-1
chrI	440821	440972	True	False	.	.	cold	1	ceh-31
chrI	441380	441531	True	False	.	.	cold	1	zip-8
chrI	442170	442321	True	False	.	.	cold	2	egl-13,sdc-2
chrI	443208	443359	True	False	.	.	cold	2	hlh-1,nfya-1
chrI	445616	445767	True	False	.	.	cold	5	ceh-36,ces-1,dsc-1,sptf-1,zip-8
chrI	446369	446520	True	False	.	.	cold	1	ces-1
chrI	447650	447801	True	False	.	.	cold	2	ces-1,sptf-1
chrI	448663	448814	True	False	.	.	none	0	.
chrI	449466	449617	True	False	.	.	cold	3	ces-1,ttx-3,unc-42
chrI	452639	452790	True	False	.	.	cold	1	hlh-1
chrI	453529	453680	True	False	.	.	cold	2	ces-1,unc-42
chrI	454817	454968	True	False	.	.	none	0	.
chrI	461671	461822	True	False	G4	stable	HOT	121	B0035.1,B0261.1,C04F5.9,C16A3.4,C34F6.9,F13H6.1,F22D6.2,F23B12.7,F37D6.2,F52B5.7,F57C9.4,M03D4.4,R02D3.7,T07F8.4,T26A5.8,ZK546.5,aha-1,ahr-1,aly-2,atf-7,athp-1,cebp-1,ceh-14,ceh-16,ceh-2,ceh-28,ceh-31,ceh-32,ceh-34,ceh-79,ceh-82,ceh-90,ces-1,cog-1,crh-2,daf-16,dpff-1,dpl-1,dsc-1,duxl-1,dve-1,efl-1,egl-13,elt-1,elt-2,elt-3,eor-1,ets-4,ets-7,eyg-1,fax-1,fkh-10,fkh-8,fos-1,hif-1,him-1,hlh-30,hlh-4,h…
chrI	471046	471197	True	False	.	.	cold	7	ceh-31,ces-1,hlh-30,lin-35,snu-23,unc-86,ztf-11
chrI	475487	475638	True	False	.	.	none	0	.
chrI	476370	476521	True	False	.	.	none	0	.
chrI	477459	477610	True	False	Mix7	stable	none	0	.
chrI	488344	488495	False	False	stable	stable	HOT	107	B0035.1,C04F5.9,C16A3.4,C34F6.9,F13H6.1,F23B12.7,F37D6.2,F49E8.2,K02D7.2,M03D4.4,R02D3.7,T07F8.4,Y22D7AL.16,ZK546.5,aly-2,athp-1,cebp-1,ceh-14,ceh-18,ceh-2,ceh-28,ceh-31,ceh-34,ceh-36,ceh-48,ceh-82,ces-1,che-1,cog-1,crh-2,daf-16,die-1,dpl-1,dsc-1,duxl-1,dve-1,efl-1,egl-13,elt-2,elt-3,eor-1,ets-4,ets-7,fkh-10,fkh-8,gmeb-2,hif-1,him-1,hlh-30,hlh-8,hmg-11,hnd-1,irx-1,jun-1,lim-6,lin-35,lsy-12,lsy-2,…
chrI	489880	490031	True	True	I2	I	cold	9	ceh-28,daf-16,dve-1,elt-2,fos-1,nhr-80,pha-4,pqm-1,ztf-18
chrI	492427	492578	False	True	.	.	cold	1	cebp-1
chrI	492687	492838	False	False	.	.	cold	1	cebp-1
chrI	495554	495705	False	True	.	.	none	0	.
chrI	506274	506425	True	False	G1	stable	cold	3	efl-1,snpc-3.4,xnd-1
chrI	509951	510102	True	True	.	.	cold	4	dpl-1,efl-1,lin-35,nfya-1
chrI	510465	510616	False	False	.	.	none	0	.
chrI	510780	510931	True	False	Mix8	stable	cold	9	F52B5.7,atf-7,athp-1,cebp-1,efl-1,repo-1,sma-3,unc-130,xnd-1
chrI	511173	511324	True	False	.	.	cold	1	daf-16
chrI	515173	515324	True	True	.	.	cold	4	cebp-1,dve-1,eor-1,pha-4
chrI	516342	516493	True	False	.	.	none	0	.
chrI	516716	516867	True	False	Mix3	stable	HOT	28	R02D3.7,blmp-1,cebp-1,ceh-28,crh-2,die-1,dpl-1,elt-2,elt-3,eor-1,fos-1,hlh-30,lsy-2,mdl-1,nhr-20,nhr-21,nhr-23,nhr-25,nhr-71,nhr-80,nhr-85,pag-3,pha-4,pqm-1,sma-3,sma-9,snu-23,tbx-2
chrI	518192	518343	False	False	stable	stable	cold	12	daf-16,dve-1,elt-2,elt-3,fos-1,jun-1,nhr-20,nhr-80,pqm-1,skn-1,sma-9,unc-62
chrI	518546	518697	False	False	stable	stable	HOT	80	C16A3.4,C34F6.9,F13H6.1,F22D6.2,F37D6.2,F52B5.7,T07F8.4,aly-1,atf-7,athp-1,cebp-1,ceh-18,ceh-2,ceh-31,ceh-34,ces-1,che-1,cog-1,crh-2,daf-16,die-1,dpl-1,dsc-1,dve-1,efl-1,elt-2,elt-3,eor-1,ets-7,fax-1,fkh-8,fos-1,hif-1,hlh-30,hlh-6,hlh-8,hmg-11,let-607,lin-35,lsy-12,lsy-2,madf-10,mdl-1,mls-2,nfya-1,nhr-102,nhr-20,nhr-21,nhr-23,nhr-25,nhr-47,nhr-48,nhr-71,nhr-80,nhr-90,pax-1,pha-4,pqm-1,rbr-2,ref-2…
chrI	519500	519651	False	False	.	.	none	0	.
chrI	519880	520031	True	False	G1	stable	cold	10	F49E8.2,athp-1,dpl-1,efl-1,lin-35,lsy-2,snpc-3.4,unc-130,xnd-1,ztf-18
chrI	520355	520506	True	False	.	.	none	0	.
chrI	521439	521590	True	False	Mix4	stable	cold	1	ref-2
chrI	524261	524412	True	False	.	.	cold	3	fos-1,hlh-30,nhr-25
chrI	524577	524728	True	True	.	.	cold	14	blmp-1,crh-2,elt-1,eor-1,fos-1,lsy-2,nhr-21,nhr-23,nhr-25,nhr-71,nhr-85,sma-3,sma-9,snu-23
chrI	526200	526351	True	False	.	.	none	0	.
chrI	527268	527419	True	False	.	.	cold	3	nhr-25,rnt-1,snu-23
chrI	527540	527691	True	False	.	.	cold	3	peb-1,ref-2,rnt-1
chrI	528015	528166	True	False	.	.	cold	16	blmp-1,ceh-28,elt-1,elt-3,fos-1,lin-35,nfya-1,nhr-21,nhr-23,nhr-25,nhr-71,nhr-85,sem-4,sma-3,snu-23,swsn-7
chrI	529259	529410	True	False	H	stable	none	0	.
chrI	529557	529708	True	True	H	I+H [2]	cold	7	elt-3,nhr-21,nhr-23,nhr-85,ref-2,sma-3,ztf-11
chrI	529911	530062	True	False	.	.	cold	3	hlh-30,nhr-25,nhr-85
chrI	530211	530362	True	False	H	stable	cold	7	blmp-1,ceh-28,eor-1,hlh-30,nhr-23,sma-3,zip-8
chrI	530466	530617	True	False	H	stable	cold	3	aly-1,nhr-25,snu-23
chrI	531128	531279	True	False	.	.	cold	2	eor-1,nhr-25
chrI	531383	531534	True	False	.	.	cold	1	ceh-36
chrI	531635	531786	True	False	H	stable	none	0	.
chrI	532895	533046	True	False	.	.	none	0	.
chrI	533218	533369	True	False	.	.	cold	2	elt-3,nhr-25
chrI	533479	533630	True	False	H	stable	cold	3	nhr-21,sma-3,tbx-2
chrI	534254	534405	True	False	G3	stable	HOT	26	C16A3.4,C34F6.9,ZK546.5,ceh-82,ces-1,daf-16,dpl-1,efl-1,hlh-30,hmg-11,lin-35,lsy-2,mdl-1,nfya-1,nhr-20,nhr-23,nhr-47,nhr-71,rnt-1,snpc-4,snu-23,swsn-7,unc-130,unc-55,xbp-1,xnd-1
chrI	535378	535529	True	False	G4	stable	HOT	123	C04F5.9,C16A3.4,C34F6.9,F13H6.1,F22D6.2,F23B12.7,F37D6.2,F49E8.2,F52B5.7,M03D4.4,R02D3.7,ZK546.5,aha-1,aly-2,atf-7,athp-1,blmp-1,cebp-1,ceh-16,ceh-18,ceh-28,ceh-30,ceh-31,ceh-34,ceh-36,ceh-48,ceh-82,ceh-90,ces-1,che-1,cog-1,crh-2,daf-16,die-1,dpl-1,dsc-1,duxl-1,dve-1,efl-1,egl-13,egl-5,elt-1,elt-2,elt-3,eor-1,ets-4,fkh-10,fkh-2,fkh-8,fos-1,gmeb-2,hif-1,him-1,hlh-1,hlh-30,hmg-11,hnd-1,irx-1,jun-1,…
chrI	536376	536527	False	False	.	.	none	0	.
chrI	536800	536951	False	False	stable	stable	HOT	141	B0035.1,B0261.1,C04F5.9,C16A3.4,C34F6.9,F13H6.1,F22D6.2,F23B12.7,F37D6.2,F49E8.2,F52B5.7,F57C9.4,K02D7.2,M03D4.4,R02D3.7,T07F8.4,T26A5.8,ZK546.5,aha-1,alr-1,aly-1,aly-2,atf-7,athp-1,attf-4,blmp-1,cebp-1,ceh-16,ceh-18,ceh-28,ceh-30,ceh-31,ceh-32,ceh-34,ceh-48,ceh-79,ceh-82,ceh-90,ces-1,che-1,cog-1,crh-2,daf-12,daf-16,dao-5,die-1,dpff-1,dpl-1,dsc-1,duxl-1,dve-1,efl-1,egl-13,egl-5,elt-1,elt-2,elt-3,…
chrI	537278	537429	True	False	.	.	none	0	.
chrI	538712	538863	False	False	stable	stable	none	0	.
chrI	542266	542417	True	False	.	.	cold	12	C34F6.9,aly-1,ceh-48,ceh-79,ces-1,eor-1,hlh-30,let-607,lsy-2,nhr-47,repo-1,unc-55
chrI	543376	543527	True	False	.	.	cold	1	unc-55
chrI	545603	545754	True	False	.	.	cold	10	cebp-1,daf-16,dve-1,elt-2,eor-1,fos-1,hif-1,nhr-80,pha-4,pqm-1
chrI	545768	545919	True	False	I1	stable	cold	7	cebp-1,daf-16,dve-1,elt-2,fos-1,hif-1,pqm-1
chrI	546615	546766	False	False	.	.	cold	1	pha-4
chrI	547202	547353	False	False	stable	stable	none	0	.
chrI	547514	547665	False	False	.	.	cold	1	pha-4
chrI	548093	548244	True	False	.	.	cold	15	C34F6.9,R02D3.7,ceh-18,crh-2,daf-16,dsc-1,eor-1,lsy-2,nhr-20,nhr-47,nhr-71,rnt-1,snu-23,swsn-7,unc-55
chrI	548412	548563	True	False	.	.	none	0	.
chrI	549325	549476	True	False	.	.	cold	1	hlh-30
chrI	549967	550118	False	False	.	.	none	0	.
chrI	550456	550607	True	True	G3	I+H [2]	cold	7	daf-16,dve-1,elt-2,fos-1,lsy-2,nhr-80,pqm-1
chrI	556118	556269	False	True	.	.	none	0	.
chrI	557289	557440	True	False	H	stable	none	0	.
chrI	561140	561291	True	False	.	.	cold	1	eor-1
chrI	562622	562773	False	True	stable	Mix1	cold	1	elt-2
chrI	562987	563138	True	False	.	.	none	0	.
chrI	565066	565217	False	False	.	.	cold	2	daf-16,elt-2
chrI	566552	566703	True	False	Mix4	stable	cold	3	ces-1,unc-42,zip-8
chrI	572756	572907	True	False	.	.	cold	1	nhr-25
chrI	575159	575310	True	True	H	I+H [1]	cold	1	nhr-25
chrI	597055	597206	True	False	.	.	cold	1	snpc-4
chrI	606635	606786	True	False	.	.	none	0	.
chrI	608904	609055	True	False	Mix1	stable	cold	5	ceh-18,dsc-1,nhr-71,rnt-1,snu-23
chrI	611702	611853	False	False	.	.	cold	5	ceh-18,dsc-1,nhr-71,rnt-1,snu-23
chrI	613173	613324	True	False	.	.	cold	2	hlh-30,sptf-1
chrI	613311	613462	True	False	.	.	cold	2	hlh-30,sptf-1
chrI	618022	618173	True	True	I2	I+H [1]	cold	1	fos-1
chrI	629589	629740	True	False	Mix8	stable	none	0	.
chrI	630263	630414	True	False	.	.	none	0	.
chrI	636763	636914	True	False	G4	stable	HOT	36	C34F6.9,F13H6.1,R02D3.7,cebp-1,ceh-14,ceh-2,ceh-31,ceh-48,ceh-90,cog-1,daf-16,dpl-1,efl-1,ets-4,fkh-8,hif-1,hlh-30,hlh-8,hmg-11,irx-1,lim-6,lin-35,lsy-2,nhr-80,nhr-90,ref-2,snpc-4,snu-23,tbx-2,tbx-7,unc-130,unc-55,unc-86,xbp-1,zip-5,ztf-11
chrI	638012	638163	True	False	G3	stable	cold	2	pha-4,zip-8
chrI	638324	638475	True	True	.	.	HOT	19	B0261.1,T26A5.8,crh-2,daf-16,die-1,dsc-1,let-607,lsy-2,madf-10,nhr-47,nhr-71,nhr-90,rnt-1,rpc-1,snu-23,swsn-7,unc-55,xnd-1,zfp-2
chrI	640117	640268	False	False	stable	stable	cold	3	eor-1,hlh-1,rnt-1
chrI	644881	645032	True	False	.	.	none	0	.
chrI	649573	649724	False	False	.	.	none	0	.
chrI	653957	654108	True	False	G4	stable	cold	9	ceh-28,dpl-1,efl-1,eor-1,hmg-11,lsy-2,nhr-71,snu-23,unc-55
chrI	663586	663737	True	False	G4	stable	HOT	26	C34F6.9,F13H6.1,ceh-82,crh-2,dpl-1,dsc-1,efl-1,elt-2,eor-1,hlh-30,hmg-11,lin-35,lsy-2,mdl-1,nfya-1,nhr-20,nhr-21,nhr-47,nhr-71,nhr-90,pha-4,snu-23,swsn-7,unc-55,unc-86,xbp-1
chrI	663971	664122	True	False	.	.	none	0	.
chrI	666417	666568	False	False	.	.	cold	1	snpc-4
chrI	670851	671002	True	False	.	.	none	0	.
chrI	678257	678408	True	True	.	.	none	0	.
chrI	680054	680205	True	False	I2	stable	cold	8	daf-16,dve-1,elt-2,fos-1,nhr-80,pha-4,pqm-1,skn-1
chrI	681488	681639	True	False	.	.	none	0	.
chrI	682941	683092	True	False	.	.	none	0	.
chrI	691389	691540	False	False	.	.	none	0	.
chrI	716297	716448	False	False	.	.	none	0	.
chrI	716703	716854	False	False	stable	stable	HOT	26	C16A3.4,C34F6.9,cebp-1,ces-1,crh-2,daf-16,dpl-1,dve-1,efl-1,eor-1,hlh-30,hmg-11,lin-35,lsy-2,mdl-1,nfya-1,nhr-20,nhr-23,nhr-47,nhr-80,pha-4,snpc-4,snu-23,swsn-7,unc-55,xbp-1
chrI	717719	717870	True	False	.	.	none	0	.
chrI	719588	719739	True	False	G1	stable	none	0	.
chrI	719921	720072	True	False	G3	stable	HOT	27	C16A3.4,C34F6.9,athp-1,cebp-1,ceh-31,ces-1,daf-16,dpl-1,dve-1,efl-1,elt-3,eor-1,hlh-30,hmg-11,lin-35,lsy-2,mdl-1,nhr-20,nhr-23,nhr-47,pha-4,snpc-3.4,snu-23,swsn-7,unc-130,unc-55,xnd-1
chrI	720274	720425	True	False	.	.	cold	1	zip-8
chrI	737588	737739	False	False	stable	stable	none	0	.
chrI	744883	745034	True	False	.	.	none	0	.
chrI	745495	745646	True	True	H	I+H [2]	cold	1	nhr-23
chrI	754147	754298	False	True	.	.	none	0	.
chrI	754614	754765	True	True	.	.	cold	13	B0261.1,F23B12.7,daf-16,die-1,him-1,madf-10,nhr-80,nhr-90,rec-8,rpc-1,snpc-3.4,unc-130,ztf-18
chrI	756959	757110	True	False	H	stable	cold	6	ceh-2,nfya-1,nhr-25,ref-2,sma-3,tbx-2
chrI	762058	762209	True	False	Mix8	stable	cold	1	zip-8
chrI	762430	762581	True	True	.	.	none	0	.
chrI	763453	763604	True	True	H	I+H [2]	cold	3	blmp-1,nhr-23,nhr-25
chrI	766064	766215	True	False	.	.	none	0	.
chrI	770779	770930	True	False	Mix6	stable	none	0	.
chrI	781576	781727	True	False	.	.	none	0	.
chrI	784086	784237	True	False	.	.	cold	3	ceh-14,ces-1,unc-42
chrI	784517	784668	True	False	.	.	cold	1	ceh-36
chrI	785303	785454	True	False	.	.	cold	1	ces-1
chrI	788100	788251	True	False	.	.	cold	16	ceh-14,ceh-31,ceh-36,ceh-48,ces-1,cog-1,hlh-8,lim-6,mls-2,nfya-1,rnt-1,sptf-1,tbx-2,ttx-3,unc-42,unc-55
chrI	788613	788764	True	False	.	.	cold	1	snpc-4
chrI	789474	789625	True	False	.	.	cold	2	ces-1,unc-42
chrI	794500	794651	True	False	.	.	cold	3	ces-1,fkh-10,unc-42
chrI	796991	797142	True	False	.	.	cold	2	ceh-14,fkh-8
chrI	798393	798544	True	False	.	.	cold	1	fkh-8
chrI	801349	801500	True	False	.	.	cold	8	F13H6.1,ces-1,fkh-10,lsy-2,nhr-47,nhr-71,sma-9,unc-42
chrI	801589	801740	True	False	.	.	cold	6	ces-1,fkh-10,lsy-2,nhr-47,nhr-71,unc-42
chrI	802009	802160	True	False	.	.	cold	1	ceh-36
chrI	803805	803956	True	False	.	.	cold	1	rpc-1
chrI	806914	807065	True	False	.	.	none	0	.
chrI	807659	807810	True	False	.	.	none	0	.
chrI	809011	809162	True	False	.	.	cold	3	ces-1,nfya-1,unc-42
chrI	809243	809394	True	False	.	.	none	0	.
chrI	810865	811016	True	False	.	.	cold	2	ceh-36,mls-2
chrI	812295	812446	True	False	.	.	none	0	.
chrI	812616	812767	True	False	.	.	none	0	.
chrI	814026	814177	True	False	.	.	cold	6	ceh-14,ceh-31,ces-1,nfya-1,unc-42,xbp-1
chrI	815682	815833	True	False	.	.	none	0	.
chrI	816061	816212	True	False	.	.	cold	3	F13H6.1,elt-1,unc-3
chrI	818191	818342	True	False	.	.	cold	4	ces-1,elt-2,pha-4,sptf-1
chrI	819584	819735	True	False	.	.	cold	2	ceh-31,egl-5
chrI	820087	820238	False	False	.	.	cold	6	Y22D7AL.16,dve-1,elt-2,fos-1,nhr-80,pqm-1
chrI	821591	821742	True	False	.	.	cold	1	ceh-31
chrI	822759	822910	True	False	.	.	none	0	.
chrI	824784	824935	True	False	.	.	none	0	.
chrI	826336	826487	True	False	.	.	cold	2	ceh-18,pha-4
chrI	828048	828199	False	False	.	.	none	0	.
chrI	828740	828891	False	False	.	.	none	0	.
chrI	830006	830157	True	False	.	.	cold	1	pha-4
chrI	833960	834111	True	False	.	.	none	0	.
chrI	834631	834782	True	False	.	.	cold	1	sptf-1
chrI	834836	834987	True	False	.	.	cold	1	sptf-1
chrI	835337	835488	True	False	.	.	none	0	.
chrI	836127	836278	True	True	H	I+H [1]	cold	1	nhr-21
chrI	840513	840664	True	False	.	.	none	0	.
chrI	843392	843543	True	False	.	.	cold	1	snpc-4
chrI	849311	849462	True	False	.	.	cold	8	M03D4.4,cebp-1,ces-1,hlh-1,lin-35,rnt-1,sptf-1,unc-42
chrI	851674	851825	True	False	Mix1	stable	cold	2	ceh-90,rnt-1
chrI	852093	852244	True	False	.	.	HOT	60	B0035.1,B0261.1,F13H6.1,F22D6.2,F23B12.7,F37D6.2,F52B5.7,F57C9.4,T07F8.4,T26A5.8,atf-7,athp-1,attf-4,cebp-1,ceh-79,crh-2,daf-16,dao-5,die-1,duxl-1,dve-1,elt-2,eor-1,fos-1,hif-1,him-1,hlh-30,let-607,lir-3,lsy-12,lsy-2,madf-10,mdl-1,mxl-1,nhr-102,nhr-179,nhr-47,nhr-48,nhr-71,nhr-80,nhr-90,pha-4,pqm-1,rbr-2,rec-8,repo-1,rpc-1,sma-3,sma-9,snpc-1.1,snpc-3.4,snpc-4,snu-23,spr-1,unc-130,unc-55,unc-86,zf…
chrI	852412	852563	False	False	stable	stable	cold	1	B0261.1
chrI	852722	852873	False	False	stable	stable	none	0	.
chrI	853245	853396	False	False	stable	stable	HOT	73	C16A3.4,C34F6.9,F13H6.1,F23B12.7,ahr-1,aly-2,ceh-14,ceh-18,ceh-2,ceh-31,ceh-34,ceh-82,ces-1,cog-1,crh-2,daf-16,dpl-1,dsc-1,dve-1,efl-1,elt-2,elt-3,eor-1,ets-4,ets-7,fax-1,fkh-10,fkh-8,fos-1,hif-1,hlh-15,hlh-30,hlh-8,hmg-11,irx-1,jun-1,lim-6,lin-35,lsy-2,madf-10,mdl-1,mls-2,nfya-1,nhr-20,nhr-25,nhr-47,nhr-71,nhr-80,nhr-90,pha-4,pqm-1,rbr-2,ref-2,rnt-1,sdc-2,sma-3,snpc-4,snu-23,sptf-1,swsn-7,tbx-2,…
chrI	872805	872956	False	False	.	.	cold	3	ceh-28,crh-2,repo-1
chrI	873095	873246	False	False	.	.	cold	2	ceh-28,ceh-48
chrI	879863	880014	True	False	Mix1	stable	HOT	29	C34F6.9,F13H6.1,ceh-14,ces-1,crh-2,dsc-1,dve-1,egl-13,elt-2,eor-1,fkh-10,fkh-8,fos-1,hlh-30,jun-1,lin-35,lsy-2,madf-10,nhr-20,nhr-21,nhr-47,nhr-71,nhr-80,nhr-90,sma-9,snu-23,swsn-7,unc-86,xbp-1
chrI	880230	880381	True	False	.	.	none	0	.
chrI	881484	881635	True	False	Mix3	stable	HOT	36	C16A3.4,C34F6.9,F13H6.1,atf-7,cebp-1,ces-1,crh-2,daf-16,dve-1,egl-13,elt-2,eor-1,fos-1,hif-1,hlh-30,jun-1,let-607,lin-35,lsy-2,madf-10,mdl-1,nhr-102,nhr-48,nhr-71,nhr-80,nhr-84,nhr-90,pha-4,pqm-1,sma-3,sma-9,snpc-4,snu-23,swsn-7,unc-42,xbp-1
chrI	881830	881981	True	False	.	.	cold	16	cebp-1,eor-1,fkh-10,fkh-8,hmg-11,lin-35,madf-10,mdl-1,nfya-1,nhr-47,nhr-71,nhr-90,rnt-1,unc-42,unc-55,xbp-1
chrI	882557	882708	True	False	Mix1	stable	cold	10	M03D4.4,athp-1,ceh-79,che-1,fkh-8,lir-3,lsy-12,repo-1,rnt-1,sptf-1
chrI	882753	882904	True	False	Mix1	stable	HOT	77	B0261.1,C34F6.9,F13H6.1,F37D6.2,M03D4.4,atf-7,athp-1,cebp-1,ceh-14,ceh-18,ceh-2,ceh-28,ceh-31,ceh-34,ceh-79,ces-1,che-1,cog-1,crh-2,dao-5,dsc-1,dve-1,egl-13,egl-5,elt-1,elt-2,eor-1,ets-4,fax-1,fkh-10,fkh-8,fos-1,hif-1,him-1,hlh-6,hmg-11,irx-1,jun-1,let-607,lin-35,lir-3,lsy-12,lsy-2,madf-10,mdl-1,mls-2,nfya-1,nhr-102,nhr-20,nhr-21,nhr-47,nhr-71,nhr-80,nhr-90,pha-2,pqm-1,pros-1,rbr-2,repo-1,rnt-1,s…
chrI	882949	883100	True	False	Mix1	stable	HOT	79	B0261.1,C34F6.9,F13H6.1,F37D6.2,atf-7,cebp-1,ceh-14,ceh-18,ceh-2,ceh-28,ceh-31,ceh-34,ceh-48,ces-1,cog-1,crh-2,daf-16,dao-5,dpl-1,dsc-1,dve-1,efl-1,egl-13,egl-5,elt-1,elt-2,eor-1,ets-4,fax-1,fkh-10,fkh-8,fos-1,hif-1,him-1,hlh-1,hlh-30,hlh-6,hmg-11,irx-1,jun-1,let-607,lin-35,lir-3,lsy-2,madf-10,mdl-1,mls-2,nfya-1,nhr-102,nhr-20,nhr-21,nhr-47,nhr-48,nhr-71,nhr-80,nhr-90,pha-2,pha-4,pqm-1,pros-1,rbr…
chrI	884468	884619	True	False	.	.	cold	3	ceh-36,hlh-1,unc-55
chrI	884726	884877	False	False	.	.	cold	1	mdl-1
chrI	885398	885549	True	False	.	.	cold	1	ceh-36
chrI	886380	886531	False	True	.	.	none	0	.
chrI	887885	888036	True	False	.	.	none	0	.
chrI	890325	890476	True	True	.	.	none	0	.
chrI	890777	890928	False	True	.	.	cold	1	cebp-1
chrI	895033	895184	True	False	G3	stable	cold	7	F49E8.2,R02D3.7,efl-1,lsy-2,snpc-3.4,unc-55,xnd-1
chrI	896002	896153	False	False	stable	stable	cold	9	C34F6.9,ceh-14,ces-1,dpl-1,eor-1,lin-35,lsy-2,pha-4,unc-55
chrI	907034	907185	False	False	.	.	cold	1	xnd-1
chrI	920499	920650	True	False	.	.	cold	1	hnd-1
chrI	927120	927271	True	False	.	.	none	0	.
chrI	929718	929869	True	False	N+M	stable	cold	5	ces-1,egl-13,nhr-71,swsn-7,unc-86
chrI	935117	935268	False	True	stable	I+H [1]	cold	1	hlh-30
chrI	935782	935933	True	True	.	.	cold	5	eor-1,hlh-30,nhr-25,rpc-1,zip-8
chrI	936633	936784	True	True	Mix1	I+H [2]	cold	2	hlh-30,nhr-25
chrI	938410	938561	True	True	Mix1	I+H [1]	cold	1	nhr-25
chrI	939603	939754	True	True	.	.	cold	1	snu-23
chrI	946069	946220	True	False	.	.	HOT	20	B0261.1,F23B12.7,T07F8.4,cebp-1,daf-16,die-1,dve-1,elt-2,him-1,hlh-30,lsy-2,madf-10,nhr-80,nhr-90,rec-8,rpc-1,snpc-4,snu-23,unc-130,ztf-18
chrI	946458	946609	False	False	.	.	none	0	.
chrI	954459	954610	True	False	.	.	cold	10	dve-1,eor-1,hif-1,hlh-1,hlh-30,lsy-12,lsy-2,rnt-1,sma-9,unc-55
chrI	954980	955131	True	False	.	.	cold	1	rnt-1
chrI	955271	955422	True	False	.	.	none	0	.
chrI	955531	955682	True	False	.	.	cold	4	ces-1,hlh-1,hlh-8,rnt-1
chrI	957437	957588	True	True	Mix2	I+H [2]	cold	10	M03D4.4,cebp-1,daf-16,elt-2,eor-1,fos-1,nhr-80,pqm-1,rnt-1,sptf-1
chrI	959975	960126	True	False	.	.	cold	1	ztf-11
chrI	961340	961491	True	False	.	.	cold	8	daf-16,dve-1,elt-1,elt-2,eor-1,hlh-30,unc-3,unc-55
chrI	961544	961695	False	False	.	.	cold	8	daf-16,dve-1,elt-2,eor-1,fos-1,hlh-30,nhr-80,pqm-1
chrI	963616	963767	True	False	.	.	none	0	.
chrI	963975	964126	True	False	.	.	none	0	.
chrI	969147	969298	False	False	.	.	none	0	.
chrI	969423	969574	True	False	.	.	none	0	.
chrI	973143	973294	False	False	stable	stable	HOT	30	F13H6.1,ces-1,daf-16,dpl-1,dsc-1,efl-1,egl-13,elt-2,fos-1,hlh-30,hlh-6,hmg-11,jun-1,lsy-2,mdl-1,nhr-20,nhr-47,nhr-80,nhr-90,pha-4,pros-1,rbr-2,rnt-1,sma-3,sma-9,snu-23,swsn-7,unc-55,xbp-1,zip-8
chrI	973786	973937	True	True	G2	I+H [2]	cold	2	B0261.1,rpc-1
chrI	978265	978416	True	False	I1	stable	cold	2	nhr-23,nhr-25
chrI	978675	978826	True	False	H	stable	cold	1	eor-1
chrI	979547	979698	True	False	.	.	cold	3	fos-1,nhr-25,sma-3
chrI	983080	983231	True	False	.	.	cold	3	nhr-23,nhr-25,sma-9
chrI	984446	984597	True	False	Mix3	stable	cold	1	lsy-2
chrI	985074	985225	True	False	Mix1	stable	cold	1	elt-1
chrI	985972	986123	True	False	.	.	none	0	.
chrI	986797	986948	True	False	.	.	cold	15	crh-2,daf-16,dve-1,elt-2,eor-1,fos-1,hlh-30,madf-10,mdl-1,nhr-20,nhr-80,nhr-90,pha-4,pqm-1,sma-9
chrI	987655	987806	True	False	I2	stable	cold	6	daf-16,elt-2,fos-1,nhr-80,pqm-1,sma-9
chrI	989005	989156	True	False	Mix3	stable	cold	9	dpl-1,eor-1,fos-1,hlh-30,nhr-23,nhr-25,pha-4,rnt-1,sma-3
chrI	990408	990559	False	False	.	.	cold	2	rpc-1,zip-8
chrI	998486	998637	True	False	.	.	none	0	.
chrI	999210	999361	True	False	.	.	HOT	35	C34F6.9,F13H6.1,R02D3.7,blmp-1,ceh-28,crh-2,daf-16,dpl-1,dsc-1,efl-1,elt-3,eor-1,fos-1,hlh-30,hmg-11,jun-1,lsy-2,mdl-1,nhr-20,nhr-21,nhr-23,nhr-25,nhr-71,nhr-80,pag-3,pha-4,rbr-2,rnt-1,sem-4,sma-3,sma-9,snpc-4,snu-23,tbx-2,ztf-4
chrI	999994	1000145	True	False	.	.	none	0	.
chrI	1000900	1001051	True	False	.	.	cold	11	F13H6.1,blmp-1,eor-1,fos-1,lsy-2,nhr-23,nhr-25,peb-1,pha-4,sem-4,sma-3
chrI	1006007	1006158	True	False	.	.	cold	1	fkh-8
chrI	1014420	1014571	True	False	G1	stable	cold	5	athp-1,efl-1,him-1,unc-130,xnd-1
chrI	1014580	1014731	True	False	G2	stable	cold	4	athp-1,him-1,unc-130,xnd-1
chrI	1015051	1015202	True	True	I1	I+H [2]	cold	11	crh-2,daf-16,dve-1,elt-2,fos-1,hlh-30,nhr-48,nhr-80,pqm-1,sma-3,sma-9
chrI	1016953	1017104	True	True	.	.	none	0	.
chrI	1017495	1017646	True	True	I1	I+H [2]	cold	8	dve-1,elt-2,fos-1,hlh-30,nhr-80,nhr-90,pqm-1,sma-9
chrI	1018922	1019073	True	False	.	.	none	0	.
chrI	1021518	1021669	True	True	.	.	cold	3	elt-2,nhr-80,pqm-1
chrI	1022186	1022337	True	True	.	.	cold	6	daf-16,dve-1,elt-2,lsy-2,nhr-80,pqm-1
chrI	1029726	1029877	False	False	.	.	none	0	.
chrI	1030102	1030253	True	False	G4	stable	cold	10	C34F6.9,ces-1,dpl-1,dsc-1,hmg-11,lin-35,lsy-2,snu-23,unc-42,unc-55
chrI	1030886	1031037	False	False	.	.	cold	1	cebp-1
chrI	1031895	1032046	False	False	stable	stable	none	0	.
chrI	1033597	1033748	True	False	G3	stable	none	0	.
chrI	1033945	1034096	True	False	G1	stable	none	0	.
chrI	1034295	1034446	True	False	G4	stable	HOT	71	C04F5.9,C16A3.4,C34F6.9,F13H6.1,F37D6.2,F49E8.2,athp-1,cebp-1,ceh-14,ceh-18,ceh-2,ceh-28,ceh-31,ceh-34,ceh-48,ceh-90,ces-1,cog-1,crh-2,dpl-1,dsc-1,dve-1,efl-1,egl-13,elt-2,eor-1,ets-4,eyg-1,fax-1,fkh-8,hif-1,hlh-30,hlh-8,hmg-11,irx-1,jun-1,lim-6,lin-35,lsy-2,madf-10,nfya-1,nhr-102,nhr-23,nhr-25,nhr-80,nhr-85,nhr-90,pha-4,pqm-1,rbr-2,rec-8,ref-2,rnt-1,sma-3,snpc-4,snu-23,sptf-1,tbx-2,tbx-7,unc-130…
chrI	1038262	1038413	True	False	.	.	cold	1	xnd-1
chrI	1041021	1041172	True	False	Mix8	stable	cold	2	unc-130,xnd-1
chrI	1046390	1046541	False	True	.	.	none	0	.
chrI	1049227	1049378	True	False	I2	stable	HOT	27	C34F6.9,atf-7,cebp-1,ceh-28,daf-16,dve-1,efl-1,elt-2,eor-1,fos-1,hlh-30,hmg-11,lin-35,lsy-2,madf-10,nhr-20,nhr-47,nhr-71,nhr-80,nhr-90,pha-4,skn-1,sma-3,snu-23,swsn-7,unc-55,ztf-7
chrI	1050439	1050590	False	False	.	.	none	0	.
chrI	1051893	1052044	False	False	.	.	cold	2	ceh-28,ceh-48
chrI	1052224	1052375	True	False	G1	stable	cold	6	cebp-1,daf-16,elt-2,fos-1,nhr-80,pha-4
chrI	1053703	1053854	True	False	.	.	HOT	41	C34F6.9,F13H6.1,F37D6.2,cebp-1,ceh-18,ceh-31,ceh-34,ceh-48,ces-1,crh-2,efl-1,egl-13,egl-5,eor-1,fkh-10,fkh-8,him-1,hlh-30,hmg-11,lin-35,lsy-2,madf-10,mdl-1,mef-2,nfya-1,nhr-20,nhr-47,nhr-71,rbr-2,ref-2,skn-1,snpc-4,snu-23,sptf-1,swsn-7,tbx-2,unc-42,unc-55,unc-86,xbp-1,ztf-18
chrI	1062079	1062230	True	False	Mix1	stable	HOT	70	B0035.1,C04F5.9,C16A3.4,C34F6.9,F13H6.1,F37D6.2,F52B5.7,ZK546.5,cebp-1,ceh-14,ceh-18,ceh-28,ceh-31,ceh-48,ceh-82,ces-1,crh-2,daf-16,die-1,dpl-1,dsc-1,duxl-1,efl-1,egl-13,elt-1,eor-1,fkh-10,fkh-8,fos-1,hif-1,him-1,hlh-1,hlh-30,hlh-8,hmg-11,irx-1,jun-1,lin-35,lsy-2,madf-10,mdl-1,mef-2,mls-2,nfya-1,nhr-20,nhr-21,nhr-47,nhr-48,nhr-71,pros-1,rbr-2,ref-2,rnt-1,sem-4,skn-1,sma-9,snpc-4,snu-23,spr-1,sptf…
chrI	1067065	1067216	True	False	G4	stable	HOT	94	B0035.1,C04F5.9,C16A3.4,C34F6.9,F13H6.1,F22D6.2,F37D6.2,R02D3.7,ZK546.5,aha-1,aly-2,atf-7,cebp-1,ceh-18,ceh-28,ceh-31,ceh-34,ceh-82,ceh-90,ces-1,cog-1,crh-2,daf-16,dpl-1,dsc-1,duxl-1,dve-1,efl-1,egl-13,egl-5,elt-1,elt-2,elt-3,eor-1,fkh-10,fkh-8,fos-1,hif-1,him-1,hlh-1,hlh-30,hmg-11,irx-1,jun-1,let-607,lin-35,lir-3,lsy-12,lsy-2,madf-10,madf-2,mdl-1,mef-2,nfya-1,nhr-10,nhr-102,nhr-20,nhr-21,nhr-23,…
chrI	1068179	1068330	True	False	Mix1	stable	HOT	98	B0035.1,C04F5.9,F13H6.1,F37D6.2,F52B5.7,M03D4.4,R02D3.7,T07F8.4,Y22D7AL.16,aha-1,aly-1,atf-7,athp-1,cebp-1,ceh-14,ceh-18,ceh-2,ceh-22,ceh-28,ceh-31,ceh-32,ceh-34,ceh-82,ceh-9,ces-1,cog-1,daf-16,dpl-1,dsc-1,dve-1,efl-1,egl-13,elt-2,eor-1,ets-4,ets-7,fax-1,fkh-10,fkh-8,fos-1,hif-1,him-1,hlh-1,hlh-30,hlh-6,hlh-8,hmg-11,irx-1,jun-1,let-607,lim-6,lin-35,lir-3,lsy-12,lsy-2,madf-10,madf-2,mdl-1,mls-2,nf…
chrI	1068402	1068553	True	False	N+M	stable	HOT	93	B0035.1,C04F5.9,C16A3.4,C34F6.9,F13H6.1,F37D6.2,M03D4.4,R02D3.7,T07F8.4,Y22D7AL.16,atf-7,athp-1,blmp-1,cebp-1,ceh-14,ceh-18,ceh-2,ceh-22,ceh-28,ceh-30,ceh-31,ceh-32,ceh-34,ceh-82,ces-1,cog-1,crh-2,daf-16,dpl-1,dsc-1,dve-1,efl-1,egl-13,elt-2,eor-1,ets-4,ets-7,fax-1,fkh-10,fkh-8,fos-1,hif-1,him-1,hlh-30,hlh-8,hmg-11,jun-1,let-607,lim-6,lin-35,lir-3,lsy-12,lsy-2,mdl-1,mef-2,mls-2,nfya-1,nhr-102,nhr-…
chrI	1069243	1069394	True	False	.	.	cold	4	Y22D7AL.16,hlh-1,nfya-1,rnt-1
chrI	1069666	1069817	True	False	Mix3	stable	cold	11	athp-1,ceh-34,ceh-48,daf-16,elt-2,eor-1,jun-1,mdl-1,nhr-80,snpc-4,vab-15
chrI	1070008	1070159	True	False	.	.	HOT	71	C16A3.4,C34F6.9,F13H6.1,F37D6.2,M03D4.4,athp-1,cebp-1,ceh-14,ceh-18,ceh-28,ceh-31,ceh-34,ceh-36,ceh-82,ceh-90,ces-1,crh-2,dpl-1,dsc-1,dve-1,efl-1,egl-13,elt-2,fax-1,fkh-10,fkh-8,hif-1,him-1,hlh-15,hlh-30,hlh-8,hmg-11,irx-1,jun-1,lin-35,lir-3,lsy-2,madf-10,mdl-1,mef-2,mls-2,nfya-1,nhr-20,nhr-47,nhr-48,nhr-71,nhr-80,pha-2,pha-4,pros-1,rbr-2,ref-2,rnt-1,sma-9,snpc-4,snu-23,spr-1,sptf-1,swsn-7,syd-9,…
chrI	1077334	1077485	True	False	.	.	cold	7	ces-1,hmg-11,nhr-20,nhr-23,nhr-25,nhr-85,snu-23
chrI	1082504	1082655	True	False	.	.	cold	1	xnd-1
chrI	1090418	1090569	True	False	.	.	none	0	.
chrI	1095642	1095793	True	False	.	.	none	0	.
chrI	1096048	1096199	True	False	.	.	cold	16	blmp-1,ceh-31,dpl-1,efl-1,elt-3,lin-35,lsy-2,nhr-20,nhr-47,nhr-71,nhr-85,nhr-90,sma-3,snu-23,swsn-7,unc-86
chrI	1099193	1099344	False	False	.	.	none	0	.
chrI	1100709	1100860	True	False	Mix2	stable	cold	9	F13H6.1,M03D4.4,ceh-18,hlh-1,nhr-71,pha-2,rnt-1,sma-9,unc-55
chrI	1102268	1102419	False	False	.	.	cold	5	blmp-1,dsc-1,hlh-1,hlh-8,unc-55
chrI	1103392	1103543	True	False	.	.	none	0	.
chrI	1106517	1106668	True	False	I2	stable	cold	1	F13H6.1
chrI	1110597	1110748	True	False	.	.	none	0	.
chrI	1112332	1112483	True	True	Mix8	Mix3	none	0	.
chrI	1119269	1119420	True	True	.	.	none	0	.
chrI	1125001	1125152	True	False	.	.	cold	1	zip-8
chrI	1126314	1126465	True	False	.	.	none	0	.
chrI	1127094	1127245	True	False	.	.	none	0	.
chrI	1128200	1128351	True	False	.	.	cold	1	nfya-1
chrI	1130854	1131005	True	False	.	.	none	0	.
chrI	1132012	1132163	True	False	.	.	cold	3	ceh-34,nhr-85,ref-2
chrI	1135517	1135668	True	False	.	.	none	0	.
chrI	1139911	1140062	True	False	.	.	cold	1	efl-1
chrI	1150223	1150374	True	True	.	.	cold	2	hif-1,unc-55
chrI	1153156	1153307	True	False	.	.	cold	6	F49E8.2,athp-1,efl-1,snpc-3.4,unc-130,xnd-1
chrI	1153392	1153543	True	False	.	.	cold	6	F49E8.2,athp-1,efl-1,snpc-3.4,unc-130,xnd-1
chrI	1156107	1156258	False	False	stable	stable	HOT	60	C16A3.4,C34F6.9,F13H6.1,F23B12.7,F49E8.2,R02D3.7,ZK546.5,aly-2,cebp-1,ceh-28,ceh-30,ceh-31,ceh-34,ceh-48,ceh-82,ces-1,cog-1,crh-2,daf-16,dpl-1,dve-1,efl-1,egl-5,elt-2,elt-3,eor-1,fkh-8,fos-1,hif-1,hlh-30,hmg-11,irx-1,jun-1,lin-35,lsy-2,madf-10,mdl-1,nfya-1,nhr-20,nhr-23,nhr-25,nhr-47,nhr-71,nhr-80,nhr-90,pax-1,pha-4,rbr-2,sma-3,snpc-1.1,snpc-3.4,snpc-4,snu-23,swsn-7,tbx-2,unc-130,unc-42,unc-55,un…
chrI	1156703	1156854	True	False	.	.	none	0	.
chrI	1157560	1157711	True	False	.	.	cold	13	F49E8.2,F52B5.7,T26A5.8,atf-7,athp-1,cebp-1,ceh-79,die-1,nhr-90,repo-1,snpc-4,xnd-1,ztf-18
chrI	1159118	1159269	False	False	.	.	cold	1	cebp-1
chrI	1161681	1161832	False	False	.	.	none	0	.
chrI	1166356	1166507	True	False	.	.	none	0	.
chrI	1174913	1175064	True	True	.	.	cold	3	dpl-1,efl-1,lin-35
chrI	1175406	1175557	False	False	.	.	none	0	.
chrI	1175792	1175943	True	False	G3	stable	HOT	75	C34F6.9,F13H6.1,K02D7.2,M03D4.4,R02D3.7,Y22D7AL.16,ahr-1,cebp-1,ceh-14,ceh-2,ceh-24,ceh-28,ceh-31,ceh-34,ceh-36,ceh-48,ceh-82,ces-1,che-1,cog-1,crh-2,daf-16,dpl-1,dsc-1,duxl-1,dve-1,efl-1,elt-2,eor-1,eyg-1,fax-1,gmeb-2,hlh-1,hlh-15,hlh-8,hmbx-1,hmg-11,hnd-1,irx-1,lim-6,lin-35,lsy-2,madf-2,mls-2,nfya-1,nhr-21,nhr-232,nhr-76,nhr-80,npax-4,pha-2,pha-4,pop-1,pqm-1,rnt-1,rpc-1,skn-1,snpc-1.1,snpc-3.4,…
chrI	1183916	1184067	True	False	.	.	cold	5	R02D3.7,dpl-1,efl-1,lin-35,unc-55
chrI	1199481	1199632	False	False	.	.	none	0	.
chrI	1217333	1217484	True	False	H	stable	none	0	.
chrI	1218551	1218702	True	False	.	.	none	0	.
chrI	1226276	1226427	True	False	.	.	cold	10	atf-7,daf-16,dve-1,elt-2,eor-1,mdl-1,nhr-80,nhr-90,pha-4,sma-9
chrI	1226645	1226796	False	False	.	.	cold	4	atf-7,elt-2,nhr-80,nhr-90
chrI	1227880	1228031	True	False	.	.	HOT	22	atf-7,ceh-28,crh-2,daf-16,dve-1,elt-2,eor-1,fos-1,hlh-30,let-607,lin-35,lsy-12,lsy-2,madf-10,mdl-1,nhr-80,nhr-90,pha-4,pqm-1,sma-9,snu-23,unc-55
chrI	1228613	1228764	True	False	.	.	none	0	.
chrI	1229334	1229485	False	False	stable	stable	HOT	40	C34F6.9,F13H6.1,blmp-1,cebp-1,crh-2,daf-16,dpl-1,dve-1,efl-1,elt-2,elt-3,eor-1,fos-1,hif-1,hlh-1,hlh-30,hmg-11,jun-1,let-607,lin-35,lsy-2,madf-10,mdl-1,nhr-20,nhr-21,nhr-23,nhr-25,nhr-48,nhr-71,nhr-80,nhr-85,nhr-90,pha-4,pqm-1,sma-3,sma-9,snu-23,unc-130,unc-55,ztf-26
chrI	1229733	1229884	False	False	.	.	cold	1	nhr-80
chrI	1230479	1230630	False	False	stable	stable	cold	13	blmp-1,crh-2,elt-1,elt-3,eor-1,hlh-30,nhr-21,nhr-23,nhr-25,nhr-80,nhr-85,sma-3,snu-23
chrI	1230849	1231000	False	False	stable	stable	none	0	.
chrI	1231507	1231658	False	False	.	.	none	0	.
chrI	1241388	1241539	True	False	.	.	none	0	.
chrI	1251575	1251726	True	False	.	.	HOT	57	C04F5.9,C16A3.4,F13H6.1,M03D4.4,blmp-1,ceh-18,ceh-2,ceh-31,ceh-34,ceh-36,ceh-82,cog-1,dpl-1,dve-1,efl-1,elt-2,elt-3,eor-1,ets-4,fos-1,hif-1,hlh-30,hmg-11,jun-1,lin-35,lsy-12,lsy-2,madf-10,mdl-1,mls-2,nfya-1,nhr-102,nhr-20,nhr-21,nhr-23,nhr-25,nhr-47,nhr-71,nhr-80,nhr-85,nhr-90,peb-1,pha-2,pha-4,rbr-2,sma-3,snpc-4,snu-23,sptf-1,swsn-7,tbx-2,unc-130,vab-15,xbp-1,ztf-11,ztf-26,ztf-4
chrI	1256066	1256217	True	False	.	.	cold	17	blmp-1,ceh-31,eor-1,fos-1,jun-1,lsy-12,lsy-2,mdl-1,mls-2,nhr-21,nhr-23,nhr-25,nhr-48,ref-2,rnt-1,sma-9,tbx-2
chrI	1257881	1258032	True	False	.	.	none	0	.
chrI	1258566	1258717	True	False	.	.	none	0	.
chrI	1259494	1259645	True	False	.	.	none	0	.
chrI	1261628	1261779	True	False	.	.	cold	4	ceh-2,ceh-34,nhr-23,pha-4
chrI	1264083	1264234	False	False	.	.	cold	1	cebp-1
chrI	1269328	1269479	True	True	.	.	cold	3	blmp-1,lin-35,nhr-23
chrI	1271079	1271230	True	False	H	stable	HOT	45	F13H6.1,blmp-1,cebp-1,ceh-14,ceh-18,ceh-2,ceh-31,ceh-34,che-1,die-1,dpff-1,eor-1,ets-4,ets-7,hif-1,hlh-30,hlh-6,hlh-8,hmg-11,lsy-12,madf-2,mdl-1,mls-2,nfya-1,nhr-102,nhr-20,nhr-21,nhr-23,nhr-25,nhr-47,nhr-48,nhr-71,nhr-85,pros-1,rbr-2,ref-2,rnt-1,sma-3,sma-9,snu-23,spr-1,swsn-7,tbx-2,ztf-16,ztf-4
chrI	1271436	1271587	True	False	.	.	cold	1	mdl-1
chrI	1272552	1272703	True	False	.	.	cold	4	F13H6.1,blmp-1,nhr-25,nhr-85
chrI	1273863	1274014	True	False	.	.	HOT	57	C04F5.9,C16A3.4,C34F6.9,F13H6.1,R02D3.7,aha-1,aly-2,blmp-1,ceh-16,ceh-18,ceh-28,ceh-31,ceh-82,crh-2,dpl-1,duxl-1,dve-1,efl-1,elt-1,elt-3,eor-1,fos-1,hlh-30,irx-1,jun-1,lin-35,lir-3,lsy-12,lsy-2,mbf-1,mdl-1,nfya-1,nhr-102,nhr-20,nhr-21,nhr-23,nhr-237,nhr-25,nhr-47,nhr-48,nhr-71,nhr-85,nhr-90,pros-1,rbr-2,ref-2,rnt-1,sem-4,sma-3,sma-9,snu-23,swsn-7,tbx-2,vab-15,xbp-1,ztf-26,ztf-4
chrI	1274036	1274187	True	False	.	.	HOT	54	C04F5.9,C16A3.4,C34F6.9,F13H6.1,R02D3.7,aly-2,blmp-1,ceh-16,ceh-18,ceh-28,ceh-31,ceh-82,crh-2,dpl-1,duxl-1,dve-1,efl-1,elt-1,elt-3,eor-1,fos-1,irx-1,jun-1,lin-35,lir-3,lsy-12,lsy-2,mdl-1,nfya-1,nhr-102,nhr-20,nhr-21,nhr-23,nhr-237,nhr-25,nhr-47,nhr-48,nhr-71,nhr-85,nhr-90,pros-1,rbr-2,ref-2,rnt-1,sem-4,sma-3,sma-9,snu-23,swsn-7,tbx-2,vab-15,xbp-1,ztf-26,ztf-4
chrI	1288804	1288955	True	False	.	.	cold	7	ceh-31,efl-1,pha-4,snu-23,swsn-7,unc-86,zip-8
chrI	1290465	1290616	False	False	.	.	cold	1	pha-4
chrI	1291281	1291432	False	False	.	.	none	0	.
chrI	1294230	1294381	False	False	.	.	none	0	.
chrI	1295550	1295701	True	False	.	.	cold	11	ces-1,hmg-11,nhr-23,nhr-25,nhr-71,nhr-85,pax-1,sem-4,sma-3,snu-23,swsn-7
chrI	1296640	1296791	True	False	.	.	HOT	32	C34F6.9,F13H6.1,crh-2,daf-16,dpl-1,dve-1,efl-1,eor-1,fos-1,hif-1,hlh-30,hmg-11,let-607,lsy-12,lsy-2,mdl-1,nfya-1,nhr-20,nhr-23,nhr-25,nhr-48,nhr-71,nhr-85,nhr-90,pha-4,rbr-2,sem-4,sma-3,snu-23,spr-1,swsn-7,xbp-1
chrI	1298908	1299059	True	False	.	.	cold	9	ceh-28,crh-2,daf-16,dve-1,elt-2,fos-1,nhr-80,pha-4,pqm-1
chrI	1300092	1300243	True	False	.	.	cold	5	blmp-1,hmg-11,nhr-23,nhr-25,snu-23
chrI	1301568	1301719	True	False	.	.	cold	9	cebp-1,daf-16,dve-1,elt-2,fos-1,hlh-30,nhr-80,pha-4,pqm-1
chrI	1303014	1303165	False	True	.	.	cold	1	daf-16
chrI	1304082	1304233	False	False	.	.	cold	1	unc-55
chrI	1304333	1304484	True	False	.	.	none	0	.
chrI	1305334	1305485	True	False	Mix6	stable	none	0	.
chrI	1305727	1305878	True	False	.	.	none	0	.
chrI	1311072	1311223	True	False	.	.	none	0	.
chrI	1312905	1313056	False	False	.	.	none	0	.
chrI	1313681	1313832	True	False	.	.	cold	2	nfya-1,unc-55
chrI	1315549	1315700	True	False	.	.	cold	11	ceh-14,ceh-31,eor-1,fkh-8,hlh-1,hlh-6,nfya-1,nhr-47,nhr-71,snu-23,unc-55
chrI	1316145	1316296	False	False	.	.	cold	1	ceh-36
chrI	1317086	1317237	False	False	.	.	cold	2	ceh-36,snu-23
chrI	1322043	1322194	True	False	.	.	none	0	.
chrI	1327936	1328087	False	False	.	.	none	0	.
chrI	1331184	1331335	True	True	.	.	cold	1	rpc-1
chrI	1335234	1335385	False	False	stable	stable	cold	6	daf-16,dve-1,elt-2,fos-1,nhr-80,pqm-1
chrI	1336773	1336924	False	False	stable	stable	cold	6	daf-16,dve-1,elt-2,fos-1,nhr-80,pqm-1
chrI	1339709	1339860	True	False	.	.	none	0	.
chrI	1340096	1340247	True	False	G4	stable	HOT	64	C04F5.9,C16A3.4,C34F6.9,F13H6.1,F49E8.2,M03D4.4,R02D3.7,atf-7,cebp-1,ceh-31,ceh-34,ceh-82,ces-1,crh-2,daf-16,dpl-1,dsc-1,dve-1,efl-1,egl-13,egl-5,elt-2,elt-3,eor-1,fkh-8,fos-1,hif-1,him-1,hlh-30,hmg-11,irx-1,lin-35,lsy-12,lsy-2,mdl-1,mls-2,nfya-1,nhr-20,nhr-21,nhr-23,nhr-25,nhr-47,nhr-71,nhr-80,nhr-90,pha-4,rbr-2,rnt-1,skn-1,sma-3,snpc-1.1,snpc-3.4,snpc-4,snu-23,sptf-1,swsn-7,tbx-2,unc-130,unc-55…
chrI	1340525	1340676	False	False	stable	stable	none	0	.
chrI	1340986	1341137	True	False	.	.	cold	2	snpc-3.4,zip-8
chrI	1341378	1341529	True	False	.	.	cold	7	atf-7,cebp-1,him-1,rec-8,repo-1,xnd-1,zip-8
chrI	1342174	1342325	True	False	.	.	none	0	.
chrI	1346214	1346365	True	False	.	.	cold	7	crh-2,dve-1,elt-2,eor-1,fos-1,nhr-80,pqm-1
chrI	1356523	1356674	False	False	.	.	none	0	.
chrI	1359580	1359731	False	False	.	.	cold	1	cebp-1
chrI	1360192	1360343	True	False	.	.	cold	3	efl-1,snpc-3.4,xnd-1
chrI	1361301	1361452	True	False	Mix1	stable	HOT	53	C16A3.4,C34F6.9,F13H6.1,aly-2,blmp-1,cebp-1,ceh-18,ceh-31,ceh-82,ces-1,crh-2,daf-16,dpl-1,dsc-1,dve-1,efl-1,elt-2,elt-3,eor-1,fkh-10,fkh-8,fos-1,hif-1,hlh-1,hlh-30,hmg-11,irx-1,jun-1,lin-35,lsy-2,mdl-1,nfya-1,nhr-20,nhr-23,nhr-47,nhr-71,nhr-80,nhr-90,pha-4,rbr-2,rnt-1,sem-4,skn-1,sma-9,snpc-4,snu-23,swsn-7,tbx-2,unc-42,unc-55,xbp-1,ztf-26,ztf-4
chrI	1363708	1363859	True	False	.	.	cold	2	dsc-1,snu-23
chrI	1365425	1365576	False	False	.	.	cold	2	eor-1,hlh-1
chrI	1368822	1368973	True	False	.	.	cold	5	daf-16,elt-2,fos-1,nhr-80,snu-23
chrI	1371187	1371338	False	False	.	.	none	0	.
chrI	1392560	1392711	True	False	.	.	none	0	.
chrI	1392915	1393066	True	False	Mix4	stable	HOT	20	C34F6.9,F13H6.1,ceh-31,ceh-48,ces-1,cog-1,daf-16,dpl-1,efl-1,eor-1,hlh-30,hmg-11,lin-35,lsy-2,nfya-1,pha-4,rbr-2,snu-23,tbx-2,unc-55
chrI	1394261	1394412	True	False	G2	stable	cold	4	efl-1,snu-23,unc-55,xbp-1
chrI	1410014	1410165	True	True	.	.	cold	2	B0261.1,rpc-1
chrI	1415520	1415671	False	False	.	.	none	0	.
chrI	1415944	1416095	True	False	G3	stable	HOT	83	C04F5.9,C16A3.4,C34F6.9,F13H6.1,F37D6.2,K02D7.2,M03D4.4,Y22D7AL.16,ahr-1,ceh-14,ceh-18,ceh-2,ceh-24,ceh-31,ceh-34,ceh-48,ceh-9,ceh-90,ces-1,che-1,cog-1,crh-2,dpl-1,dsc-1,dve-1,efl-1,egl-13,elt-2,eor-1,ets-4,ets-7,eyg-1,fax-1,fkh-8,hif-1,hlh-15,hlh-30,hlh-6,hlh-8,hmbx-1,hmg-11,hnd-1,irx-1,jun-1,lim-6,lin-35,lsy-2,madf-10,madf-2,mls-2,nhr-20,nhr-23,nhr-232,nhr-47,nhr-71,nhr-85,nhr-90,npax-4,pha-2,p…
chrI	1416102	1416253	False	False	stable	stable	HOT	80	C04F5.9,C16A3.4,C34F6.9,F13H6.1,F37D6.2,K02D7.2,M03D4.4,Y22D7AL.16,ahr-1,ceh-14,ceh-18,ceh-2,ceh-24,ceh-31,ceh-34,ceh-90,ces-1,cog-1,crh-2,dpl-1,dsc-1,dve-1,efl-1,egl-13,elt-2,eor-1,ets-4,ets-7,eyg-1,fax-1,fkh-8,hif-1,hlh-15,hlh-30,hlh-6,hlh-8,hmbx-1,hmg-11,irx-1,jun-1,lim-6,lin-35,lsy-2,madf-10,madf-2,mls-2,nhr-20,nhr-23,nhr-232,nhr-47,nhr-71,nhr-80,nhr-85,nhr-90,npax-4,pha-2,pha-4,pqm-1,rbr-2,r…
chrI	1425242	1425393	True	False	.	.	cold	4	F49E8.2,atf-7,cebp-1,him-1
chrI	1426162	1426313	False	False	.	.	none	0	.
chrI	1435235	1435386	False	False	stable	stable	cold	8	ceh-28,ceh-48,daf-16,dpl-1,efl-1,egl-13,lin-35,rnt-1
chrI	1435592	1435743	False	False	.	.	HOT	97	B0261.1,C16A3.4,C34F6.9,F13H6.1,F23B12.7,F37D6.2,F49E8.2,M03D4.4,R02D3.7,ahr-1,aly-2,athp-1,blmp-1,cebp-1,ceh-14,ceh-18,ceh-2,ceh-28,ceh-31,ceh-34,ceh-82,ces-1,cog-1,crh-2,daf-16,dpl-1,dsc-1,dve-1,efl-1,elt-2,elt-3,eor-1,ets-4,fax-1,fkh-10,fkh-8,fos-1,hif-1,him-1,hlh-1,hlh-30,hlh-6,hlh-8,hmg-11,irx-1,jun-1,lim-6,lin-35,lir-3,lsy-12,lsy-2,madf-10,madf-2,mdl-1,mls-2,nfya-1,nhr-102,nhr-20,nhr-21,nhr…
chrI	1444209	1444360	False	False	stable	stable	HOT	91	B0035.1,B0261.1,C04F5.9,C16A3.4,C34F6.9,F13H6.1,F37D6.2,M03D4.4,R02D3.7,ZK546.5,aha-1,aly-2,cebp-1,ceh-14,ceh-16,ceh-18,ceh-2,ceh-28,ceh-31,ceh-34,ceh-48,ceh-82,ceh-90,ces-1,che-1,cog-1,crh-2,daf-16,dpl-1,dsc-1,duxl-1,dve-1,efl-1,egl-13,egl-5,eor-1,fax-1,fkh-10,fkh-8,fos-1,hif-1,him-1,hlh-15,hlh-30,hmg-11,hnd-1,irx-1,jun-1,let-607,lin-35,lsy-12,lsy-2,madf-10,mdl-1,mls-2,nfya-1,nhr-20,nhr-21,nhr-4…
chrI	1447004	1447155	True	False	.	.	HOT	133	B0035.1,B0261.1,C04F5.9,C16A3.4,C34F6.9,F13H6.1,F22D6.2,F23B12.7,F37D6.2,F49E8.2,F52B5.7,M03D4.4,R02D3.7,T07F8.4,T26A5.8,aly-2,atf-7,athp-1,blmp-1,ceh-14,ceh-18,ceh-2,ceh-28,ceh-31,ceh-32,ceh-34,ceh-36,ceh-79,ceh-82,ceh-90,ces-1,che-1,cog-1,crh-2,daf-16,die-1,dpl-1,dsc-1,duxl-1,efl-1,egl-13,egl-5,elt-2,elt-3,eor-1,ets-7,eyg-1,fax-1,fkh-10,fkh-8,fos-1,gmeb-2,hif-1,him-1,hlh-1,hlh-15,hlh-30,hlh-4,h…
chrI	1451574	1451725	True	False	.	.	cold	1	zip-8
chrI	1453076	1453227	True	False	Mix6	stable	none	0	.
chrI	1455334	1455485	True	False	.	.	cold	1	snpc-4
chrI	1459069	1459220	True	False	.	.	none	0	.
chrI	1471123	1471274	True	False	Mix1	stable	cold	18	F13H6.1,ceh-18,ceh-28,ceh-48,daf-16,egl-5,eor-1,hlh-1,hlh-30,lin-35,lsy-2,nfya-1,nhr-20,nhr-71,rnt-1,snu-23,swsn-7,unc-130
chrI	1476656	1476807	False	True	.	.	none	0	.
chrI	1479352	1479503	True	False	.	.	none	0	.
chrI	1481610	1481761	True	False	Mix4	stable	HOT	61	C04F5.9,C34F6.9,F13H6.1,F37D6.2,M03D4.4,R02D3.7,cebp-1,ceh-14,ceh-18,ceh-2,ceh-28,ceh-31,ceh-34,ceh-48,ceh-82,ces-1,cog-1,crh-2,daf-16,dpl-1,dsc-1,efl-1,egl-13,eor-1,fax-1,fkh-10,fkh-8,hif-1,him-1,hlh-1,hlh-30,hmg-11,irx-1,lin-35,lir-3,lsy-2,mls-2,nfya-1,nhr-20,nhr-47,nhr-71,pop-1,pros-1,rbr-2,ref-2,rnt-1,sem-4,sma-9,snpc-4,snu-23,sptf-1,swsn-7,syd-9,tbx-2,unc-42,unc-55,unc-86,vab-15,xbp-1,ztf-16…
chrI	1482827	1482978	True	False	.	.	cold	2	ces-1,dsc-1
chrI	1493530	1493681	False	False	.	.	none	0	.
chrI	1508675	1508826	True	False	.	.	none	0	.
chrI	1514521	1514672	True	False	G4	stable	cold	8	C34F6.9,dpl-1,eor-1,hmg-11,lin-35,lsy-2,pha-4,unc-55
chrI	1535737	1535888	True	False	.	.	none	0	.
chrI	1537259	1537410	False	True	.	.	cold	2	cebp-1,unc-55
chrI	1537928	1538079	True	False	.	.	none	0	.
chrI	1539006	1539157	False	False	.	.	none	0	.
chrI	1540594	1540745	True	False	.	.	HOT	27	C34F6.9,ceh-31,ces-1,crh-2,dve-1,efl-1,eor-1,fkh-8,fos-1,hlh-30,hmg-11,lin-35,lsy-2,nfya-1,nhr-20,nhr-21,nhr-47,nhr-71,pros-1,rbr-2,snpc-4,snu-23,sptf-1,swsn-7,tbx-2,unc-55,unc-86
chrI	1540896	1541047	True	False	.	.	cold	3	cebp-1,eor-1,mdl-1
chrI	1541460	1541611	True	False	.	.	none	0	.
chrI	1548249	1548400	False	False	.	.	cold	1	pha-4
chrI	1557436	1557587	False	False	.	.	cold	1	rpc-1
chrI	1558571	1558722	True	False	.	.	cold	1	efl-1
chrI	1559174	1559325	True	False	Mix6	stable	HOT	38	C34F6.9,F13H6.1,M03D4.4,aly-1,cebp-1,ceh-14,ceh-18,ceh-31,ceh-34,ceh-48,che-1,cog-1,daf-16,dsc-1,egl-5,eor-1,fkh-8,hif-1,hlh-1,hmg-11,lin-35,lsy-2,mls-2,nfya-1,nhr-47,nhr-80,ref-2,rnt-1,snpc-4,snu-23,sptf-1,swsn-7,syd-9,tbx-2,unc-42,unc-55,unc-86,ztf-11
chrI	1562641	1562792	True	False	Mix2	stable	cold	9	C34F6.9,blmp-1,cebp-1,ceh-31,hlh-1,hmg-11,nhr-23,pha-4,snu-23
chrI	1564114	1564265	True	False	.	.	cold	5	blmp-1,eor-1,lin-35,mdl-1,snu-23
chrI	1565223	1565374	True	False	.	.	none	0	.
chrI	1574235	1574386	False	True	.	.	none	0	.
chrI	1575622	1575773	False	False	.	.	HOT	74	B0261.1,C34F6.9,F13H6.1,F23B12.7,F37D6.2,M03D4.4,Y22D7AL.16,aly-1,cebp-1,ceh-14,ceh-18,ceh-2,ceh-24,ceh-34,ceh-36,ceh-48,che-1,cog-1,crh-2,daf-16,die-1,dsc-1,dve-1,elt-2,eor-1,eyg-1,fax-1,fkh-8,fos-1,gmeb-2,hif-1,him-1,hlh-1,hlh-15,hlh-30,hlh-8,hmbx-1,hmg-11,hnd-1,irx-1,let-607,lir-3,lsy-2,madf-10,madf-2,mdl-1,mls-2,nhr-20,nhr-232,nhr-47,nhr-80,nhr-90,npax-4,pha-2,pop-1,pqm-1,rbr-2,ref-2,rnt-1,rp…
chrI	1581221	1581372	True	False	.	.	cold	4	daf-16,elt-2,nhr-80,pqm-1
chrI	1582021	1582172	True	False	.	.	cold	3	eor-1,hmg-11,unc-42
chrI	1583400	1583551	True	False	.	.	cold	1	unc-55
chrI	1585153	1585304	True	False	.	.	cold	1	ceh-18
chrI	1588221	1588372	False	False	stable	stable	cold	4	elt-2,nhr-80,pqm-1,vab-15
chrI	1596598	1596749	False	False	.	.	cold	3	C34F6.9,lsy-2,unc-55
chrI	1598560	1598711	True	False	Mix1	stable	HOT	29	C34F6.9,F13H6.1,F37D6.2,cebp-1,ceh-14,ceh-31,ceh-48,ces-1,eor-1,fkh-10,fkh-8,hif-1,him-1,hlh-30,hlh-6,hmg-11,lin-35,lsy-2,mdl-1,nhr-47,nhr-71,rbr-2,snu-23,swsn-7,unc-3,unc-42,unc-55,unc-86,xbp-1
chrI	1610116	1610267	True	False	G4	stable	cold	16	C34F6.9,ceh-82,ces-1,dpl-1,hmg-11,lin-35,lsy-2,nhr-90,pha-4,snu-23,unc-130,unc-42,unc-55,unc-86,xbp-1,ztf-11
chrI	1626490	1626641	False	False	.	.	none	0	.
chrI	1628637	1628788	True	False	I2	stable	HOT	53	C34F6.9,F13H6.1,F23B12.7,F37D6.2,blmp-1,cebp-1,ceh-14,ceh-18,ceh-28,ceh-31,ceh-34,ceh-90,ces-1,crh-2,daf-16,dpl-1,dsc-1,dve-1,efl-1,egl-13,elt-2,eor-1,fkh-10,fos-1,hif-1,hlh-30,hmg-11,lsy-2,madf-10,mdl-1,nfya-1,nhr-20,nhr-23,nhr-47,nhr-71,nhr-80,nhr-90,pha-4,pqm-1,rbr-2,sma-3,snpc-4,snu-23,sptf-1,swsn-7,tbx-2,unc-130,unc-42,unc-55,unc-86,xbp-1,ztf-16,ztf-18
chrI	1634527	1634678	True	True	H	I+H [1]	cold	1	nhr-23
chrI	1636521	1636672	True	False	.	.	cold	2	blmp-1,nhr-23
chrI	1641390	1641541	True	False	.	.	cold	2	ceh-31,tbx-2
chrI	1651382	1651533	True	False	Mix4	stable	HOT	36	C34F6.9,F13H6.1,M03D4.4,ceh-31,ceh-36,ceh-48,ces-1,cog-1,dsc-1,efl-1,egl-5,eor-1,fax-1,hlh-1,hlh-8,hmg-11,lin-35,lsy-2,madf-2,nfya-1,nhr-47,pha-4,pop-1,pros-1,rbr-2,ref-2,sem-4,snu-23,sptf-1,swsn-7,syd-9,tbx-2,unc-42,unc-55,xbp-1,ztf-11
chrI	1656779	1656930	False	False	stable	stable	none	0	.
chrI	1667364	1667515	True	False	H	stable	none	0	.
chrI	1669118	1669269	True	False	.	.	cold	2	snpc-1.1,snpc-4
chrI	1672398	1672549	True	False	.	.	cold	11	ceh-28,nhr-47,nhr-71,nhr-90,rec-8,rnt-1,snpc-1.1,snpc-4,snu-23,swsn-7,tbx-2
chrI	1676588	1676739	True	False	Mix2	stable	HOT	57	C16A3.4,C34F6.9,F13H6.1,R02D3.7,ceh-18,ceh-28,ceh-31,ceh-34,ceh-82,ces-1,cog-1,crh-2,dpl-1,dsc-1,dve-1,efl-1,egl-13,elt-2,elt-3,eor-1,fkh-8,fos-1,hlh-30,hmg-11,jun-1,lin-35,lsy-2,mdl-1,nfya-1,nhr-20,nhr-21,nhr-23,nhr-25,nhr-47,nhr-71,nhr-80,nhr-90,pha-4,rbr-2,ref-2,rnt-1,sem-4,sma-3,snpc-4,snu-23,swsn-7,tbx-2,unc-130,unc-42,unc-55,unc-86,vab-15,xbp-1,ztf-11,ztf-16,ztf-18,ztf-4
chrI	1677539	1677690	False	False	.	.	cold	2	elt-2,fos-1
chrI	1678984	1679135	False	False	stable	stable	cold	5	daf-16,eor-1,fos-1,nhr-80,pha-4
chrI	1680384	1680535	False	False	.	.	cold	1	nhr-23
chrI	1686251	1686402	False	False	stable	stable	none	0	.
chrI	1687744	1687895	False	False	stable	stable	HOT	23	C16A3.4,atf-7,cebp-1,ceh-18,crh-2,daf-16,dve-1,elt-2,eor-1,fkh-8,fos-1,hif-1,hlh-30,hmg-11,let-607,lsy-2,mdl-1,nhr-48,nhr-80,pha-4,pqm-1,sma-9,snu-23
chrI	1688945	1689096	True	False	Mix3	stable	cold	8	cebp-1,elt-3,hlh-30,nhr-20,nhr-71,nhr-80,sma-3,snu-23
chrI	1691112	1691263	True	False	.	.	cold	11	daf-16,dve-1,elt-2,fos-1,jun-1,mdl-1,nhr-25,nhr-80,pqm-1,sma-3,zip-8
chrI	1691395	1691546	True	False	.	.	HOT	58	C34F6.9,F13H6.1,F37D6.2,F52B5.7,atf-7,cebp-1,ceh-82,crh-2,die-1,dsc-1,efl-1,egl-13,elt-2,eor-1,fkh-10,fkh-8,fos-1,hif-1,him-1,hlh-30,hlh-4,hlh-6,hmg-11,irx-1,jun-1,lin-35,lsy-12,lsy-2,madf-10,mdl-1,mef-2,nfya-1,nhr-20,nhr-21,nhr-47,nhr-48,nhr-71,nhr-80,nhr-90,pha-4,pqm-1,rbr-2,rnt-1,sdc-2,sem-4,sma-3,sma-9,snpc-4,snu-23,spr-1,sptf-1,swsn-7,tbx-2,unc-30,unc-55,unc-86,xbp-1,ztf-4
chrI	1693025	1693176	True	False	.	.	cold	3	ceh-48,ces-1,dve-1
chrI	1693242	1693393	True	False	.	.	cold	8	blmp-1,dve-1,elt-1,eor-1,hlh-30,mdl-1,nhr-23,nhr-25
chrI	1695158	1695309	True	False	Mix2	stable	HOT	28	C34F6.9,athp-1,cebp-1,ceh-18,dpl-1,elt-3,eor-1,fkh-8,hif-1,hlh-1,hlh-30,hlh-8,hmg-11,lin-35,lsy-2,mdl-1,nhr-20,nhr-25,nhr-71,rnt-1,sem-4,sma-9,snu-23,swsn-7,unc-130,unc-55,vab-15,ztf-4
chrI	1697076	1697227	True	False	.	.	cold	1	nhr-71
chrI	1697993	1698144	True	False	Mix2	stable	HOT	104	C04F5.9,C16A3.4,C34F6.9,F13H6.1,F22D6.2,F37D6.2,T07F8.4,aly-1,aly-2,atf-7,athp-1,blmp-1,cebp-1,ceh-18,ceh-2,ceh-28,ceh-30,ceh-31,ceh-34,ceh-82,ces-1,cog-1,crh-2,daf-16,dao-5,die-1,dpl-1,dsc-1,duxl-1,dve-1,efl-1,egl-13,egl-5,elt-1,elt-2,elt-3,eor-1,ets-4,fax-1,fkh-10,fkh-8,fos-1,hif-1,hlh-1,hlh-30,hlh-8,hmg-11,hnd-1,irx-1,jun-1,let-607,lim-6,lin-35,lir-3,lsy-12,lsy-2,madf-10,madf-2,mdl-1,nfya-1,nh…
chrI	1701838	1701989	False	False	stable	stable	HOT	31	C34F6.9,F23B12.7,ceh-31,ces-1,crh-2,daf-16,dpl-1,efl-1,elt-3,hif-1,hlh-30,hmg-11,lin-35,lsy-2,madf-10,mdl-1,nfya-1,nhr-23,nhr-25,nhr-47,nhr-71,nhr-85,pha-4,rnt-1,sma-3,snu-23,swsn-7,unc-42,unc-55,unc-86,xbp-1
chrI	1715207	1715358	False	False	.	.	none	0	.
chrI	1717510	1717661	True	False	G4	stable	HOT	30	C34F6.9,F13H6.1,cebp-1,ces-1,crh-2,daf-16,dpl-1,dve-1,efl-1,elt-2,eor-1,fos-1,hlh-30,hmg-11,lin-35,lsy-2,mdl-1,nfya-1,nhr-20,nhr-23,nhr-25,nhr-71,nhr-80,nhr-85,nhr-90,pha-4,rbr-2,snu-23,swsn-7,xbp-1
chrI	1719151	1719302	True	False	Mix4	stable	HOT	52	C16A3.4,C34F6.9,F13H6.1,aly-2,ceh-18,ceh-31,ceh-34,ces-1,cog-1,crh-2,daf-16,dsc-1,dve-1,efl-1,egl-5,elt-3,eor-1,ets-7,fax-1,hif-1,hlh-1,hlh-30,hlh-8,hmg-11,irx-1,lin-35,lsy-2,mdl-1,mls-2,nfya-1,nhr-20,nhr-47,nhr-71,nhr-80,pag-3,pha-4,rbr-2,rnt-1,sem-4,snpc-4,snu-23,sptf-1,swsn-7,syd-9,tbx-2,unc-130,unc-42,unc-55,xbp-1,zip-5,ztf-11,ztf-4
chrI	1720665	1720816	True	False	.	.	cold	11	M03D4.4,ceh-18,dsc-1,eor-1,hlh-1,nhr-71,pag-3,sma-9,snu-23,sptf-1,unc-55
chrI	1721587	1721738	True	False	.	.	none	0	.
chrI	1722650	1722801	False	False	.	.	cold	2	snpc-4,zip-8
chrI	1728929	1729080	True	False	.	.	none	0	.
chrI	1729647	1729798	True	False	H	stable	cold	1	nhr-23
chrI	1731062	1731213	True	False	.	.	cold	2	ceh-18,ref-2
chrI	1740765	1740916	True	True	.	.	cold	7	aly-2,athp-1,hnd-1,mls-2,snu-23,sptf-1,ztf-4
chrI	1751082	1751233	True	False	G4	stable	cold	12	C34F6.9,ceh-82,ces-1,dsc-1,egl-13,lin-35,lsy-2,pha-4,snu-23,unc-130,unc-55,xbp-1
chrI	1774660	1774811	True	False	.	.	none	0	.
chrI	1777441	1777592	True	False	.	.	cold	2	ceh-28,eor-1
chrI	1778779	1778930	False	False	stable	stable	cold	5	blmp-1,hlh-30,mdl-1,nhr-23,snu-23
chrI	1791809	1791960	False	False	.	.	none	0	.
chrI	1792634	1792785	False	False	stable	stable	cold	11	blmp-1,ceh-28,elt-1,hmg-11,nhr-23,nhr-25,nhr-85,rnt-1,sma-3,snu-23,unc-130
chrI	1793072	1793223	False	False	.	.	none	0	.
chrI	1797275	1797426	False	False	.	.	cold	4	ceh-28,ceh-48,snpc-1.1,snpc-4
chrI	1800166	1800317	True	False	.	.	cold	1	snpc-4
chrI	1807963	1808114	True	False	N+M	stable	HOT	27	C34F6.9,F13H6.1,F37D6.2,ceh-31,ceh-48,crh-2,dsc-1,efl-1,egl-13,eor-1,fkh-10,fkh-8,hif-1,him-1,hlh-30,hmg-11,lin-35,lsy-2,mdl-1,nhr-47,rbr-2,sma-9,snpc-4,swsn-7,unc-55,unc-86,xbp-1
chrI	1808646	1808797	False	False	.	.	cold	1	rpc-1
chrI	1809754	1809905	False	False	.	.	cold	6	ceh-36,dsc-1,fkh-8,nhr-47,snpc-4,swsn-7
chrI	1815939	1816090	False	False	stable	stable	cold	2	daf-16,pha-4
chrI	1823038	1823189	True	False	G3	stable	HOT	110	C04F5.9,C16A3.4,C34F6.9,F13H6.1,F23B12.7,F37D6.2,F49E8.2,M03D4.4,R02D3.7,Y22D7AL.16,ahr-1,aly-1,athp-1,cebp-1,ceh-14,ceh-18,ceh-2,ceh-24,ceh-31,ceh-34,ceh-82,ceh-9,ceh-90,ces-1,che-1,cog-1,crh-2,daf-16,dpl-1,dsc-1,dve-1,efl-1,egl-13,egl-5,elt-2,elt-3,eor-1,ets-4,ets-7,eyg-1,fax-1,fkh-10,fkh-8,fos-1,hif-1,him-1,hlh-1,hlh-15,hlh-4,hlh-6,hlh-8,hmbx-1,hmg-11,hnd-1,irx-1,jun-1,lim-6,lin-35,lir-3,lsy-1…
chrI	1823210	1823361	False	False	stable	stable	HOT	111	C04F5.9,C16A3.4,C34F6.9,F13H6.1,F23B12.7,F37D6.2,F49E8.2,M03D4.4,R02D3.7,Y22D7AL.16,ahr-1,aly-1,athp-1,cebp-1,ceh-14,ceh-18,ceh-2,ceh-24,ceh-31,ceh-34,ceh-82,ceh-9,ceh-90,ces-1,che-1,cog-1,crh-2,daf-16,dpl-1,dsc-1,dve-1,efl-1,egl-13,egl-5,elt-2,elt-3,eor-1,ets-4,ets-7,eyg-1,fax-1,fkh-10,fkh-8,fos-1,hif-1,him-1,hlh-1,hlh-15,hlh-30,hlh-4,hlh-6,hlh-8,hmbx-1,hmg-11,hnd-1,irx-1,jun-1,lim-6,lin-35,lir-…
chrI	1825964	1826115	True	True	.	.	none	0	.
chrI	1826205	1826356	False	False	.	.	none	0	.
chrI	1832205	1832356	False	False	.	.	cold	1	dsc-1
chrI	1832613	1832764	False	False	stable	stable	HOT	53	C16A3.4,C34F6.9,F13H6.1,F23B12.7,R02D3.7,ZK546.5,cebp-1,ceh-28,ceh-31,ceh-82,ces-1,crh-2,daf-16,dpl-1,dsc-1,dve-1,efl-1,egl-5,elt-2,elt-3,eor-1,fkh-8,him-1,hlh-1,hlh-30,hmg-11,irx-1,lin-35,lir-3,lsy-2,mdl-1,nfya-1,nhr-20,nhr-21,nhr-23,nhr-25,nhr-47,nhr-71,nhr-80,nhr-90,pha-4,rbr-2,rnt-1,skn-1,sma-3,snpc-4,snu-23,swsn-7,unc-130,unc-42,unc-55,unc-86,xbp-1
chrI	1834889	1835040	False	False	.	.	cold	6	F49E8.2,F52B5.7,T26A5.8,athp-1,daf-16,snpc-1.1
chrI	1835095	1835246	False	False	.	.	cold	4	F52B5.7,T26A5.8,athp-1,xnd-1
chrI	1835533	1835684	True	False	Mix2	stable	HOT	143	B0035.1,B0261.1,C04F5.9,C16A3.4,C34F6.9,F13H6.1,F22D6.2,F23B12.7,F37D6.2,F49E8.2,F52B5.7,F57C9.4,M03D4.4,R02D3.7,T07F8.4,Y22D7AL.16,ZK546.5,aha-1,ahr-1,aly-2,atf-7,athp-1,attf-4,blmp-1,cebp-1,ceh-14,ceh-18,ceh-2,ceh-22,ceh-28,ceh-31,ceh-32,ceh-34,ceh-36,ceh-48,ceh-79,ceh-82,ces-1,che-1,cog-1,crh-2,daf-16,dao-5,die-1,dpl-1,dsc-1,duxl-1,dve-1,efl-1,egl-13,egl-5,elt-1,elt-2,elt-3,ets-4,ets-7,eyg-1,f…
chrI	1836212	1836363	True	False	.	.	cold	11	daf-16,dve-1,elt-2,elt-3,eor-1,fos-1,nhr-80,nhr-90,pha-4,pqm-1,sma-9
chrI	1836350	1836501	True	False	.	.	cold	15	daf-16,dve-1,elt-2,elt-3,eor-1,fos-1,hlh-15,nhr-80,nhr-90,pha-4,pqm-1,skn-1,sma-9,ttx-3,ztf-16
chrI	1836469	1836620	True	False	.	.	cold	16	K02D7.2,ahr-1,cog-1,him-1,hlh-15,hmbx-1,hnd-1,madf-2,mls-2,nhr-80,nhr-85,nhr-90,skn-1,ttx-3,ztf-16,ztf-26
chrI	1836782	1836933	True	False	.	.	HOT	115	B0035.1,C04F5.9,C16A3.4,C34F6.9,F13H6.1,F37D6.2,K02D7.2,M03D4.4,R02D3.7,ZK546.5,aha-1,ahr-1,atf-7,athp-1,cebp-1,ceh-14,ceh-18,ceh-2,ceh-22,ceh-24,ceh-28,ceh-31,ceh-34,ceh-48,ceh-82,ces-1,che-1,cog-1,crh-2,daf-16,dpff-1,dpl-1,dsc-1,dve-1,efl-1,egl-13,egl-5,elt-2,elt-3,ets-4,ets-7,eyg-1,fax-1,fkh-10,fkh-8,fos-1,gmeb-2,hif-1,him-1,hlh-1,hlh-30,hlh-4,hlh-6,hlh-8,hmbx-1,hmg-11,hnd-1,irx-1,jun-1,let-60…
chrI	1836993	1837144	True	False	.	.	HOT	89	B0035.1,C04F5.9,C16A3.4,C34F6.9,F13H6.1,F37D6.2,F52B5.7,R02D3.7,ZK546.5,aha-1,cebp-1,ceh-14,ceh-18,ceh-22,ceh-31,ceh-34,ceh-82,ces-1,cog-1,daf-16,dpl-1,dsc-1,duxl-1,dve-1,efl-1,egl-13,elt-2,elt-3,ets-4,ets-7,fax-1,fkh-10,fkh-8,fos-1,hif-1,him-1,hlh-1,hlh-30,hlh-4,hlh-8,hmg-11,jun-1,let-607,lin-35,lsy-12,lsy-2,madf-10,mdl-1,mef-2,mls-2,nfya-1,nhr-102,nhr-20,nhr-21,nhr-23,nhr-47,nhr-48,nhr-71,nhr-7…
chrI	1837679	1837830	False	False	.	.	none	0	.
chrI	1839749	1839900	False	False	.	.	cold	1	efl-1
chrI	1840860	1841011	False	False	.	.	none	0	.
chrI	1841203	1841354	False	False	.	.	none	0	.
chrI	1842009	1842160	False	False	.	.	HOT	60	C04F5.9,C34F6.9,F13H6.1,F23B12.7,F37D6.2,R02D3.7,ZK546.5,cebp-1,ceh-28,ceh-31,ces-1,crh-2,daf-16,dpl-1,dsc-1,dve-1,efl-1,elt-2,elt-3,eor-1,fkh-8,fos-1,hif-1,him-1,hlh-30,hmg-11,jun-1,lin-35,lsy-12,lsy-2,mdl-1,mls-2,nfya-1,nhr-20,nhr-21,nhr-23,nhr-25,nhr-47,nhr-71,nhr-90,pax-1,pha-2,pha-4,rbr-2,rnt-1,sem-4,sma-3,sma-9,snpc-3.4,snu-23,swsn-7,tbx-2,tra-4,unc-130,unc-55,unc-86,vab-15,xbp-1,zfp-2,ztf-4
chrI	1842435	1842586	False	False	stable	stable	none	0	.
chrI	1845024	1845175	True	False	G4	stable	cold	11	F13H6.1,crh-2,daf-16,dve-1,elt-2,hlh-30,mdl-1,nhr-48,nhr-80,pha-4,sma-9
chrI	1852707	1852858	True	False	.	.	none	0	.
chrI	1853010	1853161	True	False	G3	stable	none	0	.
chrI	1861842	1861993	True	False	.	.	cold	2	efl-1,hmg-11
chrI	1869124	1869275	False	False	.	.	none	0	.
chrI	1870848	1870999	False	False	.	.	cold	7	C34F6.9,ceh-48,ces-1,eor-1,lsy-2,nfya-1,unc-55
chrI	1872350	1872501	True	False	.	.	cold	2	F23B12.7,unc-130
chrI	1872572	1872723	True	False	G2	stable	cold	11	F23B12.7,F49E8.2,athp-1,efl-1,him-1,lsy-2,snpc-1.1,snpc-3.4,snpc-4,unc-130,xnd-1
chrI	1873860	1874011	True	False	Mix2	stable	HOT	123	B0035.1,C04F5.9,C16A3.4,C34F6.9,F13H6.1,F22D6.2,F37D6.2,M03D4.4,R02D3.7,ZK546.5,aha-1,aly-2,atf-7,athp-1,attf-4,blmp-1,cebp-1,ceh-14,ceh-18,ceh-2,ceh-28,ceh-30,ceh-31,ceh-32,ceh-34,ceh-48,ceh-82,ceh-90,ces-1,cog-1,crh-2,daf-16,die-1,dpl-1,dsc-1,duxl-1,dve-1,efl-1,egl-13,egl-5,elt-1,elt-2,elt-3,eor-1,ets-4,ets-7,eyg-1,fax-1,fkh-10,fkh-8,fos-1,hif-1,him-1,hlh-1,hlh-30,hlh-6,hlh-8,hmg-11,hnd-1,irx-1…
chrI	1874544	1874695	True	False	.	.	none	0	.
chrI	1876526	1876677	False	False	.	.	none	0	.
chrI	1877774	1877925	True	False	.	.	HOT	31	blmp-1,crh-2,dpl-1,dve-1,elt-3,eor-1,fos-1,irx-1,jun-1,lsy-2,nfya-1,nhr-20,nhr-21,nhr-23,nhr-25,nhr-47,nhr-71,nhr-80,nhr-85,nhr-90,pha-4,sma-3,sma-9,snu-23,spr-1,swsn-7,tbx-2,unc-130,xbp-1,ztf-26,ztf-4
chrI	1878110	1878261	False	False	.	.	cold	1	nfya-1
chrI	1878915	1879066	True	False	.	.	cold	1	zip-8
chrI	1888646	1888797	True	False	.	.	none	0	.
chrI	1895052	1895203	True	False	G4	stable	HOT	22	C16A3.4,C34F6.9,R02D3.7,ceh-82,ces-1,dpl-1,dsc-1,efl-1,eor-1,hmg-11,lin-35,lsy-2,mdl-1,nfya-1,nhr-23,nhr-90,pha-4,snu-23,swsn-7,unc-130,unc-55,xbp-1
chrI	1911723	1911874	True	True	.	.	cold	6	daf-16,dve-1,elt-2,fos-1,nhr-80,pqm-1
chrI	1913986	1914137	True	True	I1	I+H [2]	cold	17	atf-7,cebp-1,crh-2,daf-16,dve-1,elt-2,fos-1,jun-1,let-607,madf-10,mdl-1,nhr-48,nhr-80,nhr-90,pha-4,pqm-1,sma-9
chrI	1915963	1916114	True	True	.	.	cold	7	daf-16,dve-1,elt-2,fos-1,nhr-80,nhr-90,pqm-1
chrI	1916802	1916953	False	True	.	.	cold	1	daf-16
chrI	1919287	1919438	True	True	Mix8	I+H [2]	cold	9	crh-2,daf-16,dve-1,elt-2,fos-1,hlh-30,nhr-80,pha-4,pqm-1
chrI	1943238	1943389	False	True	.	.	cold	1	cebp-1
chrI	1958475	1958626	True	False	I2	stable	HOT	128	C04F5.9,C16A3.4,C34F6.9,F13H6.1,F22D6.2,F23B12.7,F37D6.2,F49E8.2,K02D7.2,M03D4.4,R02D3.7,T07F8.4,Y22D7AL.16,ZK546.5,ahr-1,aly-1,atf-7,athp-1,cebp-1,ceh-14,ceh-18,ceh-2,ceh-22,ceh-24,ceh-28,ceh-30,ceh-31,ceh-32,ceh-34,ceh-36,ceh-48,ceh-82,ceh-9,ceh-90,ces-1,che-1,cog-1,crh-2,daf-16,dao-5,dpl-1,dsc-1,dve-1,efl-1,egl-13,egl-5,elt-2,elt-3,eor-1,ets-4,ets-7,eyg-1,fax-1,fkh-10,fos-1,gmeb-2,hif-1,him-1,…
chrI	1972698	1972849	True	False	.	.	none	0	.
chrI	1977982	1978133	True	False	.	.	cold	2	efl-1,xnd-1
chrI	1978249	1978400	True	False	G3	stable	cold	1	cebp-1
chrI	1978567	1978718	False	False	.	.	cold	1	lin-35
chrI	1978817	1978968	True	False	.	.	cold	3	dpl-1,efl-1,lin-35
chrI	1979491	1979642	False	False	.	.	none	0	.
chrI	2002398	2002549	True	False	.	.	cold	2	snpc-1.1,snpc-4
chrI	2011299	2011450	True	False	Mix2	stable	HOT	38	C16A3.4,C34F6.9,F13H6.1,blmp-1,ceh-18,ceh-31,ceh-34,cog-1,daf-16,dpl-1,dve-1,efl-1,elt-2,elt-3,eor-1,ets-7,fos-1,hif-1,hlh-1,hlh-30,lin-35,lsy-2,mdl-1,nfya-1,nhr-20,nhr-47,nhr-71,nhr-80,nhr-90,pha-4,rnt-1,sma-3,sma-9,snu-23,swsn-7,tbx-2,unc-55,ztf-16
chrI	2016804	2016955	False	True	.	.	none	0	.
chrI	2019505	2019656	True	False	I1	stable	cold	12	crh-2,daf-16,dve-1,elt-2,fos-1,hlh-30,lsy-2,nhr-80,pha-4,pqm-1,sma-9,ztf-7
chrI	2020052	2020203	True	False	.	.	HOT	19	F13H6.1,cebp-1,ceh-18,daf-16,dve-1,efl-1,elt-2,hlh-30,madf-10,mdl-1,nhr-20,nhr-48,nhr-71,nhr-80,nhr-90,pha-4,pqm-1,sma-3,sma-9
chrI	2021311	2021462	True	False	.	.	HOT	22	C34F6.9,F13H6.1,ceh-18,daf-16,dve-1,efl-1,elt-2,eor-1,fos-1,hmg-11,lin-35,lsy-2,nfya-1,nhr-71,nhr-80,pha-4,rnt-1,sma-9,snpc-4,snu-23,swsn-7,unc-55
chrI	2023322	2023473	True	False	.	.	cold	4	dve-1,hlh-30,nhr-80,unc-55
chrI	2024698	2024849	False	False	.	.	HOT	45	C34F6.9,F13H6.1,F23B12.7,F37D6.2,cebp-1,ceh-18,ceh-31,ces-1,crh-2,daf-16,dpl-1,dsc-1,dve-1,efl-1,egl-13,elt-2,eor-1,fkh-8,fos-1,hif-1,him-1,hlh-30,hmg-11,irx-1,let-607,lin-35,lsy-2,mdl-1,mef-2,nhr-20,nhr-47,nhr-71,nhr-80,pha-4,pqm-1,rbr-2,rnt-1,sem-4,sma-9,snpc-4,snu-23,swsn-7,unc-55,unc-86,xbp-1
chrI	2026128	2026279	True	False	Mix1	stable	cold	1	C34F6.9
chrI	2034184	2034335	True	False	.	.	cold	1	ceh-28
chrI	2034550	2034701	False	False	.	.	cold	1	cebp-1
chrI	2041159	2041310	True	False	.	.	cold	3	snpc-1.1,snpc-4,xnd-1
chrI	2045036	2045187	True	False	Mix4	stable	HOT	28	C34F6.9,F37D6.2,cebp-1,ceh-18,ceh-31,ces-1,crh-2,dsc-1,efl-1,eor-1,fkh-8,hlh-1,hlh-30,hlh-8,lin-35,lsy-2,mdl-1,nhr-47,nhr-71,pha-4,rnt-1,snu-23,swsn-7,unc-130,unc-42,unc-55,unc-86,xbp-1
chrI	2045218	2045369	True	False	.	.	HOT	27	C34F6.9,F37D6.2,cebp-1,ceh-18,ceh-31,ces-1,crh-2,dsc-1,efl-1,eor-1,hlh-1,hlh-30,hlh-8,lin-35,lsy-2,mdl-1,nhr-47,nhr-71,pha-4,rnt-1,snu-23,swsn-7,unc-130,unc-42,unc-55,unc-86,xbp-1
chrI	2047168	2047319	True	False	.	.	cold	1	lsy-2
chrI	2049152	2049303	True	False	.	.	none	0	.
chrI	2050077	2050228	False	False	.	.	none	0	.
chrI	2054726	2054877	True	False	.	.	cold	1	zip-8
chrI	2061357	2061508	True	False	.	.	cold	2	efl-1,ztf-18
chrI	2062627	2062778	False	False	.	.	cold	1	eor-1
chrI	2064000	2064151	True	False	G4	stable	HOT	30	C16A3.4,C34F6.9,F23B12.7,F49E8.2,R02D3.7,aly-2,ces-1,dpl-1,dsc-1,efl-1,elt-3,eor-1,hmg-11,lin-35,lsy-2,nfya-1,nhr-20,nhr-21,nhr-23,nhr-47,nhr-71,rnt-1,snpc-4,snu-23,swsn-7,unc-130,unc-55,unc-86,xbp-1,ztf-7
chrI	2064388	2064539	False	False	.	.	none	0	.
chrI	2064820	2064971	True	True	H	I+H [2]	cold	2	lsy-2,snpc-3.4
chrI	2065560	2065711	True	False	.	.	cold	4	cebp-1,fkh-8,nhr-47,swsn-7
chrI	2066860	2067011	False	False	.	.	none	0	.
chrI	2068962	2069113	True	False	.	.	cold	8	F49E8.2,die-1,duxl-1,him-1,nhr-90,snpc-3.4,unc-130,xnd-1
chrI	2069318	2069469	True	False	.	.	cold	18	F49E8.2,F52B5.7,T26A5.8,athp-1,cebp-1,dao-5,die-1,efl-1,mxl-1,nhr-80,rbr-2,sma-3,snpc-4,spr-1,unc-130,xnd-1,ztf-11,ztf-18
chrI	2070004	2070155	True	False	.	.	cold	1	lsy-2
chrI	2070371	2070522	True	False	.	.	none	0	.
chrI	2070822	2070973	False	False	stable	stable	HOT	65	C04F5.9,C16A3.4,C34F6.9,F13H6.1,F23B12.7,F37D6.2,R02D3.7,ZK546.5,aly-2,blmp-1,cebp-1,ceh-28,ceh-31,ceh-82,ces-1,crh-2,daf-16,dpl-1,dsc-1,dve-1,efl-1,egl-5,elt-1,elt-2,elt-3,eor-1,fkh-8,fos-1,hif-1,hlh-1,hlh-30,hmg-11,irx-1,jun-1,lin-35,lsy-2,mdl-1,nfya-1,nhr-20,nhr-21,nhr-23,nhr-25,nhr-47,nhr-71,nhr-80,nhr-90,pax-1,pha-4,rbr-2,rnt-1,skn-1,sma-3,snpc-1.1,snpc-3.4,snpc-4,snu-23,sptf-1,swsn-7,unc-13…
chrI	2074564	2074715	True	False	.	.	none	0	.
chrI	2076964	2077115	True	True	.	.	HOT	31	C34F6.9,F13H6.1,F23B12.7,cebp-1,crh-2,daf-16,dpl-1,dve-1,efl-1,elt-2,elt-3,eor-1,hlh-1,hlh-30,lin-35,lsy-2,madf-10,mdl-1,nhr-20,nhr-48,nhr-71,nhr-80,nhr-90,pag-3,pha-4,pqm-1,sma-3,sma-9,snpc-4,snu-23,ztf-26
chrI	2078149	2078300	True	False	.	.	cold	5	dve-1,elt-2,fos-1,nhr-80,pqm-1
chrI	2084302	2084453	True	False	I1	stable	cold	2	dve-1,nhr-80
chrI	2084936	2085087	False	False	.	.	HOT	129	B0035.1,B0261.1,C04F5.9,C16A3.4,C34F6.9,F13H6.1,F22D6.2,F23B12.7,F37D6.2,F49E8.2,F52B5.7,F57C9.4,K02D7.2,M03D4.4,R02D3.7,T07F8.4,Y22D7AL.16,aha-1,aly-2,atf-7,athp-1,blmp-1,cebp-1,ceh-14,ceh-18,ceh-2,ceh-28,ceh-31,ceh-34,ceh-36,ceh-48,ceh-79,ceh-82,ceh-90,ces-1,che-1,crh-2,daf-16,dao-5,die-1,dpff-1,dpl-1,dsc-1,duxl-1,dve-1,efl-1,egl-13,egl-5,elt-2,elt-3,eor-1,ets-7,eyg-1,fkh-8,fos-1,hif-1,him-1,hl…
chrI	2086445	2086596	True	False	.	.	none	0	.
chrI	2088931	2089082	True	False	.	.	cold	4	ces-1,dsc-1,hlh-8,ztf-11
chrI	2095190	2095341	True	False	Mix4	stable	cold	1	fkh-10
chrI	2097021	2097172	True	False	G4	stable	HOT	74	C04F5.9,C16A3.4,C34F6.9,F13H6.1,F23B12.7,F37D6.2,R02D3.7,athp-1,cebp-1,ceh-14,ceh-2,ceh-30,ceh-31,ceh-34,ceh-82,ceh-90,ces-1,crh-2,dpl-1,dsc-1,dve-1,efl-1,egl-13,egl-5,elt-2,elt-3,eor-1,ets-4,fax-1,fkh-10,fkh-8,fos-1,hif-1,him-1,hlh-30,irx-1,jun-1,let-607,lin-35,lir-3,lsy-2,mdl-1,nfya-1,nhr-20,nhr-21,nhr-23,nhr-25,nhr-47,nhr-71,nhr-85,nhr-90,pag-3,pha-4,rbr-2,rnt-1,sem-4,sma-3,sma-9,snpc-1.1,snpc…
chrI	2100043	2100194	True	False	.	.	cold	2	ceh-31,tbx-7
chrI	2118329	2118480	False	True	.	.	cold	2	elt-2,nhr-80
chrI	2119381	2119532	True	False	I2	stable	cold	6	daf-16,dve-1,elt-2,fos-1,nhr-80,pqm-1
chrI	2120743	2120894	False	False	.	.	cold	3	fos-1,nhr-80,pqm-1
chrI	2125222	2125373	True	False	.	.	cold	11	F23B12.7,daf-16,dve-1,elt-2,eor-1,hif-1,hlh-30,mdl-1,nhr-80,pha-4,snu-23
chrI	2126823	2126974	True	False	Mix3	stable	cold	15	C34F6.9,daf-16,dve-1,elt-2,eor-1,fos-1,hmg-11,lsy-2,nhr-80,pha-4,pqm-1,rbr-2,snu-23,unc-55,ztf-7
chrI	2143633	2143784	False	False	.	.	none	0	.
chrI	2147831	2147982	True	True	.	.	cold	1	rpc-1
chrI	2151768	2151919	True	False	Mix5	stable	cold	1	zip-8
chrI	2154007	2154158	True	False	.	.	cold	2	daf-16,unc-55
chrI	2155581	2155732	True	False	.	.	HOT	25	F13H6.1,ceh-31,ceh-34,elt-3,fos-1,hlh-30,mls-2,nfya-1,nhr-20,nhr-23,nhr-25,nhr-71,nhr-85,nhr-90,rbr-2,ref-2,sdc-2,sma-3,snu-23,tbx-2,unc-130,xbp-1,zip-8,ztf-11,ztf-16
chrI	2155984	2156135	True	False	.	.	none	0	.
chrI	2156240	2156391	True	False	.	.	none	0	.
chrI	2156657	2156808	True	False	.	.	cold	5	F49E8.2,efl-1,him-1,lsy-2,xnd-1
chrI	2157137	2157288	False	False	stable	stable	cold	3	ces-1,fkh-10,unc-42
chrI	2167905	2168056	True	False	.	.	cold	2	blmp-1,hlh-30
chrI	2169913	2170064	False	False	.	.	none	0	.
chrI	2170463	2170614	False	False	.	.	none	0	.
chrI	2176886	2177037	True	False	.	.	none	0	.
chrI	2178145	2178296	True	False	.	.	cold	1	zip-8
chrI	2179962	2180113	True	False	.	.	cold	3	efl-1,nhr-23,pax-1
chrI	2182926	2183077	True	False	.	.	cold	2	pha-4,tbx-2
chrI	2184917	2185068	True	False	.	.	none	0	.
chrI	2186553	2186704	True	False	.	.	cold	3	dve-1,lsy-2,pha-4
chrI	2187265	2187416	True	False	.	.	none	0	.
chrI	2189464	2189615	False	True	.	.	cold	6	dve-1,elt-2,fos-1,nhr-80,pha-4,pqm-1
chrI	2190534	2190685	True	False	.	.	cold	8	daf-16,dve-1,elt-2,fos-1,lsy-2,nhr-80,pha-4,pqm-1
chrI	2191352	2191503	False	False	.	.	cold	1	pha-4
chrI	2192526	2192677	True	False	.	.	none	0	.
chrI	2210397	2210548	True	False	.	.	cold	1	elt-3
chrI	2211703	2211854	True	False	.	.	none	0	.
chrI	2212179	2212330	True	False	.	.	none	0	.
chrI	2219109	2219260	True	False	.	.	cold	1	nfya-1
chrI	2219608	2219759	False	False	.	.	none	0	.
chrI	2220779	2220930	True	False	.	.	none	0	.
chrI	2247717	2247868	True	False	I2	stable	cold	5	daf-16,elt-2,fos-1,nhr-80,pqm-1
chrI	2249233	2249384	True	False	I2	stable	cold	8	dve-1,elt-2,fos-1,hif-1,hlh-30,nhr-80,pqm-1,skn-1
chrI	2250775	2250926	False	False	.	.	cold	3	elt-2,fos-1,nhr-80
chrI	2253966	2254117	False	False	.	.	cold	3	ceh-9,elt-2,nhr-80
chrI	2272376	2272527	True	False	.	.	cold	2	B0261.1,rpc-1
chrI	2273066	2273217	False	False	.	.	cold	4	fos-1,nhr-80,pha-4,zip-8
chrI	2277048	2277199	True	False	N+M	stable	cold	5	ces-1,hmg-11,snu-23,unc-42,unc-55
chrI	2280408	2280559	True	False	Mix6	stable	none	0	.
chrI	2291155	2291306	True	False	Mix2	stable	HOT	94	C04F5.9,C16A3.4,C34F6.9,F13H6.1,F22D6.2,F23B12.7,F37D6.2,M03D4.4,R02D3.7,ZK546.5,aha-1,aly-2,athp-1,blmp-1,cebp-1,ceh-14,ceh-18,ceh-2,ceh-28,ceh-30,ceh-31,ceh-34,ceh-82,ces-1,cog-1,crh-2,daf-16,dao-5,die-1,dpl-1,dsc-1,duxl-1,dve-1,efl-1,egl-13,egl-5,elt-2,elt-3,eor-1,ets-4,fkh-10,fkh-2,fkh-8,fos-1,hif-1,him-1,hlh-1,hlh-30,hmg-11,irx-1,jun-1,let-607,lin-35,lsy-12,lsy-2,madf-10,mdl-1,nfya-1,nhr-10,…
chrI	2291504	2291655	False	False	.	.	cold	6	dve-1,elt-2,nhr-80,nhr-90,pqm-1,sma-3
chrI	2292871	2293022	True	False	Mix2	stable	HOT	69	C04F5.9,C16A3.4,C34F6.9,F13H6.1,F23B12.7,F37D6.2,M03D4.4,aly-2,cebp-1,ceh-18,ceh-2,ceh-28,ceh-31,ceh-34,ceh-48,ceh-82,ces-1,cog-1,crh-2,daf-16,dpl-1,duxl-1,dve-1,efl-1,egl-13,egl-5,elt-2,eor-1,fkh-10,fkh-8,fos-1,hif-1,him-1,hlh-1,hlh-30,hmg-11,irx-1,jun-1,lin-35,lsy-12,lsy-2,mdl-1,mef-2,nfya-1,nhr-20,nhr-21,nhr-47,nhr-71,nhr-80,pha-4,rbr-2,rnt-1,sem-4,skn-1,sma-9,snpc-4,snu-23,sptf-1,swsn-7,tbx-2…
chrI	2296033	2296184	False	False	.	.	cold	1	ref-2
chrI	2299698	2299849	True	False	Mix4	stable	HOT	34	C34F6.9,F13H6.1,M03D4.4,aly-1,ceh-14,ceh-18,ceh-2,ceh-22,ceh-31,ceh-34,ces-1,cog-1,hlh-1,hlh-6,hlh-8,hmg-11,lin-35,lsy-2,mls-2,nfya-1,nhr-232,nhr-47,ref-2,rnt-1,snu-23,sptf-1,swsn-7,syd-9,tbx-2,tbx-7,tra-4,unc-42,unc-86,xbp-1
chrI	2302824	2302975	False	False	.	.	none	0	.
chrI	2304234	2304385	True	False	Mix8	stable	cold	8	F52B5.7,T26A5.8,athp-1,ceh-79,snpc-3.4,snpc-4,unc-130,xnd-1
chrI	2306051	2306202	True	False	.	.	cold	1	hlh-6
chrI	2306843	2306994	True	False	G3	stable	cold	18	C16A3.4,C34F6.9,crh-2,daf-16,dpl-1,dve-1,efl-1,eor-1,lin-35,lsy-2,mdl-1,nhr-23,nhr-25,nhr-80,pha-4,snu-23,unc-55,xnd-1
chrI	2307202	2307353	True	False	G1	stable	cold	1	efl-1
chrI	2308623	2308774	True	False	.	.	none	0	.
chrI	2309309	2309460	True	False	.	.	cold	3	efl-1,unc-55,xnd-1
chrI	2311816	2311967	False	False	.	.	cold	1	zip-8
chrI	2312235	2312386	False	True	stable	Mix3	cold	4	cebp-1,efl-1,unc-55,unc-86
chrI	2313049	2313200	False	False	stable	stable	HOT	36	C16A3.4,C34F6.9,F23B12.7,R02D3.7,cebp-1,ceh-28,ceh-90,ces-1,crh-2,daf-16,dpl-1,dve-1,efl-1,elt-2,elt-3,eor-1,fkh-8,lin-35,lsy-2,nhr-20,nhr-21,nhr-23,nhr-47,nhr-71,pha-4,rnt-1,skn-1,sma-3,snpc-3.4,snu-23,sptf-1,swsn-7,unc-130,unc-42,unc-55,xbp-1
chrI	2316036	2316187	True	False	G2	stable	cold	8	F49E8.2,efl-1,him-1,snpc-1.1,snpc-3.4,snpc-4,unc-130,xnd-1
chrI	2318516	2318667	True	False	.	.	cold	2	atf-7,ztf-26
chrI	2318812	2318963	True	True	.	.	cold	2	cebp-1,unc-55
chrI	2321888	2322039	True	False	G3	stable	HOT	72	C04F5.9,C16A3.4,C34F6.9,F13H6.1,F23B12.7,F37D6.2,R02D3.7,athp-1,blmp-1,cebp-1,ceh-31,ceh-82,ceh-90,crh-2,dpl-1,dsc-1,dve-1,efl-1,egl-13,egl-5,elt-2,elt-3,eor-1,fkh-10,fkh-8,fos-1,hif-1,him-1,hlh-30,hmg-11,irx-1,jun-1,lin-35,lir-3,lsy-12,lsy-2,madf-10,madf-2,mdl-1,nhr-102,nhr-20,nhr-21,nhr-23,nhr-25,nhr-47,nhr-71,nhr-80,nhr-85,nhr-90,pax-1,pha-4,rbr-2,rnt-1,sem-4,skn-1,sma-3,sma-9,snpc-1.1,snpc-3.…
chrI	2322682	2322833	True	False	G2	stable	cold	2	snpc-1.1,snpc-4
chrI	2322933	2323084	True	False	.	.	cold	1	snpc-4
chrI	2333146	2333297	False	False	stable	stable	cold	1	nhr-80
chrI	2335476	2335627	False	False	.	.	none	0	.
chrI	2339860	2340011	True	False	.	.	none	0	.
chrI	2342137	2342288	True	False	Mix5	stable	cold	1	zip-8
chrI	2354931	2355082	True	False	.	.	none	0	.
chrI	2385119	2385270	True	True	.	.	cold	11	ceh-31,ceh-90,dpl-1,efl-1,ets-4,nhr-47,nhr-71,rnt-1,snu-23,swsn-7,ztf-11
chrI	2385959	2386110	False	True	.	.	none	0	.
chrI	2390938	2391089	True	False	.	.	none	0	.
chrI	2393447	2393598	True	False	Mix2	stable	HOT	43	C16A3.4,C34F6.9,F13H6.1,cebp-1,ceh-18,ceh-28,ceh-31,ceh-48,ces-1,crh-2,dpl-1,dsc-1,dve-1,efl-1,elt-2,eor-1,fkh-8,hif-1,hlh-1,hlh-30,hmg-11,jun-1,lin-35,lsy-2,madf-10,mdl-1,nfya-1,nhr-20,nhr-23,nhr-47,nhr-71,nhr-80,nhr-90,pha-4,rnt-1,sma-3,snu-23,sptf-1,swsn-7,tbx-2,unc-55,unc-86,xbp-1
chrI	2395055	2395206	False	False	.	.	none	0	.
chrI	2401583	2401734	True	False	G4	stable	HOT	79	C04F5.9,C16A3.4,C34F6.9,F13H6.1,F23B12.7,F37D6.2,F49E8.2,R02D3.7,ZK546.5,aly-2,athp-1,blmp-1,cebp-1,ceh-2,ceh-28,ceh-48,ceh-82,ceh-90,ces-1,cog-1,crh-2,daf-16,dpl-1,dsc-1,dve-1,efl-1,egl-13,egl-5,elt-2,elt-3,eor-1,fkh-10,fkh-8,fos-1,hif-1,him-1,hlh-30,hmg-11,irx-1,jun-1,lin-35,lir-3,lsy-2,madf-10,mdl-1,nfya-1,nhr-102,nhr-20,nhr-21,nhr-23,nhr-25,nhr-47,nhr-71,nhr-80,nhr-90,pax-1,pha-4,rbr-2,ref-2,…
chrI	2404739	2404890	False	False	.	.	none	0	.
chrI	2405034	2405185	True	False	.	.	none	0	.
chrI	2405522	2405673	True	False	.	.	cold	1	efl-1
chrI	2410072	2410223	True	False	.	.	HOT	114	B0035.1,B0261.1,C16A3.4,F13H6.1,F22D6.2,F23B12.7,F37D6.2,F49E8.2,F52B5.7,F57C9.4,K02D7.2,M03D4.4,T07F8.4,T26A5.8,Y22D7AL.16,ahr-1,atf-7,athp-1,cebp-1,ceh-14,ceh-18,ceh-2,ceh-22,ceh-24,ceh-31,ceh-34,ceh-36,ceh-48,ceh-79,ceh-9,che-1,cog-1,daf-16,dao-5,die-1,dpl-1,duxl-1,dve-1,efl-1,elt-2,elt-3,eor-1,ets-4,ets-7,eyg-1,fax-1,fos-1,gmeb-2,hif-1,him-1,hlh-15,hlh-30,hlh-6,hlh-8,hmbx-1,hmg-11,hnd-1,jun-1…
chrI	2411717	2411868	True	False	.	.	cold	3	snpc-1.1,snpc-4,xnd-1
chrI	2413090	2413241	False	False	.	.	none	0	.
chrI	2413570	2413721	True	False	.	.	none	0	.
chrI	2414160	2414311	True	False	.	.	cold	5	fkh-8,nhr-71,snu-23,tbx-2,unc-86
chrI	2420299	2420450	True	False	I2	stable	cold	1	lsy-2
chrI	2420602	2420753	True	False	I2	stable	HOT	23	C34F6.9,cebp-1,crh-2,daf-16,dve-1,elt-2,eor-1,hmg-11,lsy-2,nhr-102,nhr-20,nhr-47,nhr-71,nhr-80,nhr-90,pha-4,sma-3,snpc-1.1,snpc-4,snu-23,swsn-7,xbp-1,ztf-4
chrI	2421001	2421152	False	False	.	.	none	0	.
chrI	2421223	2421374	False	False	.	.	none	0	.
chrI	2421775	2421926	False	False	stable	stable	HOT	43	C04F5.9,C16A3.4,C34F6.9,F13H6.1,cebp-1,ceh-2,ceh-82,ceh-90,ces-1,crh-2,daf-16,dpl-1,dsc-1,dve-1,efl-1,elt-2,elt-3,eor-1,fkh-8,fos-1,him-1,hlh-30,hmg-11,jun-1,lin-35,lsy-2,mdl-1,nfya-1,nhr-20,nhr-25,nhr-47,nhr-71,nhr-80,pha-4,rnt-1,sma-3,snpc-4,snu-23,swsn-7,unc-130,unc-55,xbp-1,xnd-1
chrI	2427735	2427886	True	False	.	.	cold	1	snpc-4
chrI	2428010	2428161	True	False	.	.	none	0	.
chrI	2428670	2428821	True	True	Mix8	I+H [2]	none	0	.
chrI	2432030	2432181	True	False	.	.	cold	1	efl-1
chrI	2432279	2432430	True	False	.	.	cold	5	F49E8.2,cebp-1,efl-1,snpc-3.4,xnd-1
chrI	2433683	2433834	True	False	G4	stable	HOT	44	C16A3.4,C34F6.9,F13H6.1,F23B12.7,cebp-1,ceh-28,ceh-31,ceh-48,ceh-82,ces-1,crh-2,dpl-1,dve-1,efl-1,egl-5,elt-3,eor-1,fos-1,hif-1,hlh-30,hmg-11,irx-1,jun-1,lin-35,lsy-2,mdl-1,nfya-1,nhr-20,nhr-23,nhr-25,nhr-47,nhr-71,pha-4,rbr-2,rnt-1,skn-1,sma-3,snu-23,swsn-7,unc-130,unc-55,unc-86,xbp-1,xnd-1
chrI	2434067	2434218	False	False	.	.	none	0	.
chrI	2436048	2436199	True	False	.	.	cold	1	xnd-1
chrI	2436820	2436971	True	False	Mix7	stable	cold	2	crh-2,lin-35
chrI	2437030	2437181	True	False	.	.	cold	8	crh-2,dve-1,elt-2,fkh-8,hmg-11,lin-35,pha-4,unc-55
chrI	2437571	2437722	True	False	Mix6	stable	none	0	.
chrI	2464683	2464834	True	False	Mix4	stable	cold	4	ceh-14,ces-1,dsc-1,mls-2
chrI	2470920	2471071	False	False	.	.	none	0	.
chrI	2485218	2485369	False	False	.	.	none	0	.
chrI	2485573	2485724	True	False	G4	stable	HOT	75	C04F5.9,C16A3.4,C34F6.9,F13H6.1,F23B12.7,F37D6.2,M03D4.4,R02D3.7,blmp-1,cebp-1,ceh-18,ceh-2,ceh-28,ceh-30,ceh-34,ceh-48,ceh-82,ces-1,cog-1,crh-2,daf-16,dpl-1,dsc-1,dve-1,efl-1,egl-13,elt-2,elt-3,eor-1,fax-1,fkh-8,fos-1,hif-1,hlh-1,hlh-30,hlh-8,hmg-11,irx-1,lin-35,lsy-2,madf-10,mdl-1,mls-2,nfya-1,nhr-20,nhr-21,nhr-23,nhr-25,nhr-47,nhr-80,nhr-90,pax-1,pha-4,rbr-2,sem-4,skn-1,sma-3,snpc-3.4,snpc-4,s…
chrI	2487836	2487987	False	False	.	.	HOT	45	F13H6.1,ahr-1,cebp-1,ceh-14,ceh-18,ceh-2,ceh-31,ceh-34,ces-1,cog-1,efl-1,ets-4,ets-7,fax-1,fkh-8,hif-1,hlh-15,hlh-8,hnd-1,lim-6,lsy-2,madf-10,nfya-1,nhr-47,nhr-71,nhr-80,npax-4,pha-2,pqm-1,rbr-2,ref-2,rnt-1,snu-23,sptf-1,tbx-2,tbx-7,unc-130,unc-3,unc-42,unc-55,unc-86,vab-15,zip-5,ztf-16,ztf-18
chrI	2489847	2489998	True	True	G1	Mix2	none	0	.
chrI	2513775	2513926	True	False	.	.	none	0	.
chrI	2514247	2514398	True	True	.	.	HOT	127	B0035.1,B0261.1,C34F6.9,F13H6.1,F22D6.2,F23B12.7,F37D6.2,F49E8.2,F52B5.7,F57C9.4,K02D7.2,M03D4.4,T07F8.4,T26A5.8,Y22D7AL.16,aha-1,ahr-1,aly-1,atf-7,athp-1,cebp-1,ceh-14,ceh-18,ceh-2,ceh-22,ceh-31,ceh-34,ceh-36,ceh-48,ceh-79,ceh-9,che-1,cog-1,crh-2,daf-16,dao-5,die-1,dpff-1,dpl-1,dsc-1,duxl-1,dve-1,efl-1,egl-13,elt-2,elt-3,eor-1,ets-4,ets-7,eyg-1,fax-1,fos-1,gmeb-2,hif-1,him-1,hlh-15,hlh-30,hlh-6,…
chrI	2516682	2516833	True	False	.	.	cold	2	nhr-80,unc-55
chrI	2517800	2517951	False	False	.	.	none	0	.
chrI	2519027	2519178	True	False	.	.	none	0	.
chrI	2552937	2553088	True	False	Mix4	stable	cold	3	ces-1,mls-2,unc-42
chrI	2565291	2565442	True	False	.	.	none	0	.
chrI	2571143	2571294	True	False	.	.	cold	16	ceh-31,dsc-1,efl-1,hif-1,him-1,lir-3,nhr-47,nhr-90,rnt-1,swsn-7,tbx-2,unc-55,vab-15,xbp-1,zip-5,ztf-11
chrI	2571453	2571604	False	False	.	.	cold	2	ceh-36,him-1
chrI	2574060	2574211	True	False	.	.	none	0	.
chrI	2577197	2577348	True	False	.	.	HOT	30	C34F6.9,F13H6.1,F37D6.2,cebp-1,ceh-18,ces-1,daf-16,egl-13,eor-1,fkh-8,hif-1,him-1,hlh-1,hlh-30,hmg-11,irx-1,lsy-2,mdl-1,nhr-20,nhr-47,nhr-71,rnt-1,sma-9,snu-23,swsn-7,unc-42,unc-55,unc-86,zip-8,ztf-4
chrI	2577429	2577580	True	False	Mix2	stable	HOT	22	C34F6.9,F37D6.2,cebp-1,ceh-18,ces-1,egl-13,eor-1,fkh-8,hif-1,him-1,hlh-1,hmg-11,lsy-2,nhr-71,rnt-1,sem-4,sma-9,snu-23,swsn-7,unc-42,unc-86,zip-8
chrI	2580167	2580318	True	False	Mix1	stable	HOT	30	C34F6.9,F13H6.1,cebp-1,ceh-14,ceh-18,ces-1,dsc-1,egl-13,fkh-10,fkh-8,hif-1,him-1,hlh-30,hmg-11,lin-35,lsy-2,mdl-1,nhr-102,nhr-47,nhr-71,rbr-2,rnt-1,sma-9,snu-23,swsn-7,tbx-2,unc-3,unc-42,unc-55,unc-86
chrI	2584092	2584243	False	False	.	.	cold	2	eor-1,repo-1
chrI	2585952	2586103	False	False	.	.	cold	2	eor-1,nhr-85
chrI	2586260	2586411	False	False	stable	stable	HOT	41	C16A3.4,C34F6.9,F13H6.1,atf-7,blmp-1,cebp-1,ceh-28,ceh-34,crh-2,daf-16,dpl-1,dve-1,efl-1,elt-2,elt-3,fos-1,hif-1,hlh-30,hmg-11,lin-35,lsy-2,madf-10,mdl-1,nhr-20,nhr-25,nhr-47,nhr-71,nhr-80,nhr-85,nhr-90,pha-4,rbr-2,rnt-1,sem-4,sma-3,snpc-4,snu-23,swsn-7,unc-55,xbp-1,ztf-4
chrI	2586856	2587007	True	False	.	.	cold	2	snpc-4,xnd-1
chrI	2587105	2587256	True	False	.	.	cold	1	snpc-4
chrI	2587351	2587502	True	False	I2	stable	HOT	24	C16A3.4,C34F6.9,atf-7,blmp-1,ceh-18,crh-2,daf-16,eor-1,hif-1,hlh-1,hlh-30,hmg-11,let-607,lin-35,mdl-1,pha-4,repo-1,rnt-1,snu-23,spr-1,swsn-7,unc-130,unc-55,xbp-1
chrI	2587650	2587801	True	False	.	.	HOT	50	C16A3.4,C34F6.9,F13H6.1,F22D6.2,atf-7,blmp-1,cebp-1,ceh-18,ceh-28,crh-2,daf-16,dpl-1,dve-1,efl-1,elt-1,elt-2,elt-3,eor-1,fos-1,hif-1,jun-1,let-607,lin-35,lsy-12,lsy-2,madf-10,mdl-1,nhr-102,nhr-20,nhr-21,nhr-25,nhr-47,nhr-48,nhr-71,nhr-80,nhr-85,nhr-90,pha-4,pqm-1,repo-1,rnt-1,skn-1,sma-3,sma-9,snpc-4,snu-23,spr-1,swsn-7,xbp-1,ztf-7
chrI	2589121	2589272	True	False	.	.	cold	1	daf-16
chrI	2591554	2591705	False	False	.	.	HOT	21	C04F5.9,C34F6.9,F13H6.1,aha-1,ceh-18,crh-2,daf-16,elt-1,eor-1,hif-1,hlh-1,lir-3,lsy-2,mdl-1,nfya-1,nhr-20,nhr-71,rnt-1,snu-23,unc-55,zip-8
chrI	2594346	2594497	False	False	.	.	none	0	.
chrI	2595465	2595616	True	True	Mix1	Mix1	none	0	.
chrI	2596502	2596653	False	False	.	.	none	0	.
chrI	2597483	2597634	False	False	.	.	none	0	.
chrI	2598526	2598677	True	False	Mix3	stable	cold	6	blmp-1,elt-3,nhr-23,nhr-25,snu-23,unc-55
chrI	2598841	2598992	False	False	.	.	none	0	.
chrI	2601713	2601864	True	False	.	.	cold	1	zip-8
chrI	2603724	2603875	True	False	N+M	stable	HOT	42	C34F6.9,F13H6.1,M03D4.4,ceh-31,ceh-82,ces-1,cog-1,crh-2,dsc-1,efl-1,elt-3,eor-1,fkh-8,fos-1,hif-1,him-1,hlh-1,hlh-30,hmg-11,lin-35,lsy-2,mdl-1,nfya-1,nhr-20,nhr-25,nhr-47,nhr-71,nhr-90,pha-4,pros-1,rbr-2,rnt-1,sem-4,sma-3,sma-9,snu-23,swsn-7,unc-42,unc-55,unc-86,xbp-1,ztf-4
chrI	2605395	2605546	True	False	N+M	stable	HOT	31	C34F6.9,F13H6.1,F37D6.2,cebp-1,ceh-14,ceh-18,ceh-31,dsc-1,efl-1,egl-5,eor-1,hif-1,hlh-1,hmg-11,lin-35,lsy-2,madf-10,mef-2,nfya-1,nhr-47,nhr-71,rbr-2,rnt-1,sma-9,snu-23,swsn-7,tbx-2,unc-55,unc-86,xbp-1,ztf-11
chrI	2608599	2608750	True	False	.	.	cold	1	ceh-34
chrI	2620403	2620554	True	False	G3	stable	HOT	20	C16A3.4,C34F6.9,F23B12.7,F49E8.2,crh-2,dpl-1,efl-1,eor-1,hif-1,lin-35,lsy-2,nhr-23,nhr-25,nhr-71,pha-4,rnt-1,snpc-4,snu-23,unc-130,unc-55
chrI	2622948	2623099	True	True	.	.	cold	3	F49E8.2,athp-1,cebp-1
chrI	2628239	2628390	True	False	Mix6	stable	cold	6	C34F6.9,hlh-1,hmg-11,let-607,rnt-1,unc-55
chrI	2628633	2628784	True	False	.	.	cold	11	aha-1,crh-2,egl-5,elt-2,elt-3,eor-1,fos-1,hif-1,nhr-80,pqm-1,rnt-1
chrI	2628796	2628947	False	False	.	.	cold	10	aha-1,crh-2,egl-5,elt-2,elt-3,fos-1,hif-1,nhr-80,pqm-1,rnt-1
chrI	2629175	2629326	False	False	.	.	HOT	20	C04F5.9,C34F6.9,ceh-82,dpl-1,dsc-1,dve-1,efl-1,elt-3,eor-1,irx-1,lin-35,lsy-2,nhr-20,nhr-23,nhr-71,pha-4,rnt-1,snu-23,swsn-7,xbp-1
chrI	2629367	2629518	True	False	Mix8	stable	HOT	22	C04F5.9,C34F6.9,ceh-82,dpl-1,dsc-1,dve-1,efl-1,elt-3,eor-1,irx-1,lin-35,lsy-2,nhr-20,nhr-23,nhr-47,nhr-71,pha-4,rnt-1,snu-23,swsn-7,unc-55,xbp-1
chrI	2632611	2632762	False	False	stable	stable	none	0	.
chrI	2634635	2634786	True	False	.	.	cold	6	dpl-1,hif-1,lsy-2,nhr-80,rnt-1,unc-55
chrI	2634931	2635082	False	False	.	.	none	0	.
chrI	2636133	2636284	True	False	.	.	cold	1	B0261.1
chrI	2636415	2636566	True	False	.	.	cold	1	B0261.1
chrI	2639743	2639894	True	False	.	.	HOT	129	B0035.1,B0261.1,C04F5.9,C16A3.4,C34F6.9,F13H6.1,F22D6.2,F23B12.7,F37D6.2,F49E8.2,F52B5.7,M03D4.4,R02D3.7,T07F8.4,ZK546.5,aha-1,aly-2,atf-7,athp-1,blmp-1,cebp-1,ceh-14,ceh-18,ceh-2,ceh-28,ceh-31,ceh-32,ceh-34,ceh-48,ceh-82,ceh-90,ces-1,che-1,cog-1,crh-2,daf-16,die-1,dpl-1,dsc-1,duxl-1,dve-1,efl-1,egl-13,egl-5,elt-1,elt-2,elt-3,eor-1,ets-4,fax-1,fkh-10,fkh-8,fos-1,hif-1,him-1,hlh-1,hlh-30,hlh-8,hmb…
chrI	2642414	2642565	True	False	G3	stable	cold	6	dpl-1,efl-1,eor-1,lsy-2,nhr-80,snu-23
chrI	2648390	2648541	True	True	.	.	cold	1	snu-23
chrI	2648918	2649069	True	False	.	.	cold	5	F13H6.1,nhr-20,pha-4,sma-3,sma-9
chrI	2653302	2653453	False	True	.	.	cold	1	daf-16
chrI	2654532	2654683	True	False	.	.	cold	12	C04F5.9,cebp-1,daf-16,eor-1,hif-1,hlh-30,mdl-1,nhr-20,nhr-71,rnt-1,snu-23,unc-130
chrI	2655801	2655952	True	True	.	.	cold	7	elt-3,hlh-30,mdl-1,nhr-20,nhr-71,snu-23,unc-130
chrI	2655998	2656149	True	True	.	.	cold	4	hlh-30,nhr-20,nhr-71,sma-9
chrI	2657121	2657272	True	False	I1	stable	cold	16	F13H6.1,daf-16,dpl-1,dve-1,elt-2,elt-3,eor-1,hif-1,hlh-30,lsy-2,mdl-1,nhr-71,nhr-80,nhr-90,pha-4,sma-9
chrI	2658650	2658801	False	True	.	.	cold	1	pha-4
chrI	2659322	2659473	False	False	.	.	none	0	.
chrI	2659632	2659783	False	False	.	.	cold	14	C34F6.9,ces-1,daf-16,eor-1,hlh-30,lsy-2,mdl-1,nhr-71,nhr-80,sem-4,snu-23,unc-42,unc-55,xbp-1
chrI	2659898	2660049	False	False	.	.	cold	15	ceh-18,daf-16,dve-1,eor-1,hmg-11,irx-1,lsy-2,mdl-1,nhr-71,nhr-80,pha-4,rbr-2,sem-4,snu-23,unc-55
chrI	2660030	2660181	False	False	.	.	cold	8	ceh-18,daf-16,dve-1,hmg-11,irx-1,pha-4,rbr-2,unc-55
chrI	2661319	2661470	False	False	.	.	cold	2	eor-1,unc-55
chrI	2662590	2662741	False	False	.	.	cold	17	C34F6.9,ceh-18,crh-2,dsc-1,eor-1,fkh-8,hif-1,hlh-1,hlh-30,irx-1,nhr-20,nhr-47,nhr-71,rnt-1,snu-23,swsn-7,unc-130
chrI	2663267	2663418	False	False	.	.	none	0	.
chrI	2663692	2663843	False	False	.	.	cold	4	elt-1,eor-1,hlh-30,lsy-2
chrI	2664172	2664323	False	False	.	.	cold	4	hlh-30,nhr-20,sma-9,snu-23
chrI	2664977	2665128	True	False	.	.	cold	1	unc-86
chrI	2665323	2665474	False	False	.	.	cold	1	pha-4
chrI	2665892	2666043	True	False	.	.	cold	16	F13H6.1,daf-16,dve-1,elt-2,eor-1,fos-1,hif-1,hlh-30,nhr-20,nhr-48,nhr-71,nhr-80,pqm-1,skn-1,sma-3,sma-9
chrI	2666718	2666869	True	False	I2	stable	cold	11	daf-16,dve-1,elt-2,hif-1,lsy-2,nhr-71,nhr-80,pag-3,pha-4,rnt-1,snu-23
chrI	2667914	2668065	True	False	I1	stable	HOT	33	C34F6.9,F13H6.1,F22D6.2,atf-7,cebp-1,ceh-18,daf-16,dve-1,elt-2,fos-1,hif-1,hlh-30,irx-1,let-607,lin-35,lsy-2,mdl-1,nhr-20,nhr-21,nhr-47,nhr-48,nhr-71,nhr-80,nhr-90,pha-4,pqm-1,rbr-2,rnt-1,skn-1,sma-3,sma-9,snpc-4,snu-23
chrI	2668264	2668415	True	True	.	.	cold	6	daf-16,elt-2,eor-1,jun-1,nhr-80,pqm-1
chrI	2668692	2668843	True	False	Mix3	stable	cold	18	F13H6.1,F52B5.7,cebp-1,ceh-18,crh-2,hlh-30,lsy-2,mdl-1,nhr-20,nhr-71,rnt-1,sma-3,sma-9,snu-23,swsn-7,unc-130,xbp-1,ztf-4
chrI	2669305	2669456	False	False	.	.	cold	1	ceh-36
chrI	2669742	2669893	False	False	.	.	none	0	.
chrI	2670568	2670719	True	False	.	.	cold	8	daf-16,dve-1,elt-2,nhr-20,nhr-71,nhr-80,sma-9,snu-23
chrI	2672067	2672218	False	False	.	.	cold	1	nhr-80
chrI	2673038	2673189	False	False	.	.	none	0	.
chrI	2678152	2678303	True	False	.	.	cold	14	C34F6.9,F13H6.1,ceh-18,daf-16,egl-5,eor-1,hlh-1,lsy-2,nhr-71,rnt-1,sma-9,snu-23,unc-55,vab-15
chrI	2679544	2679695	True	False	.	.	cold	16	C34F6.9,F13H6.1,F37D6.2,ceh-18,ceh-34,efl-1,eor-1,hlh-30,lsy-2,nhr-71,rnt-1,sma-9,snu-23,swsn-7,tbx-2,unc-55
chrI	2680782	2680933	False	False	.	.	none	0	.
chrI	2681502	2681653	True	False	.	.	cold	9	C34F6.9,F37D6.2,ces-1,eor-1,fkh-10,him-1,hmg-11,nhr-71,unc-42
chrI	2682533	2682684	False	False	.	.	none	0	.
chrI	2682978	2683129	True	False	N+M	stable	HOT	25	C34F6.9,F13H6.1,F37D6.2,cebp-1,ceh-18,ceh-31,eor-1,hlh-30,hmg-11,irx-1,lin-35,lsy-2,mdl-1,nfya-1,nhr-71,rnt-1,sdc-2,sma-9,snpc-4,snu-23,swsn-7,unc-42,unc-55,unc-86,xbp-1
chrI	2684496	2684647	False	False	.	.	cold	1	snpc-4
chrI	2684843	2684994	False	False	.	.	cold	3	egl-5,unc-86,xbp-1
chrI	2686459	2686610	True	True	.	.	cold	10	cebp-1,daf-16,duxl-1,dve-1,elt-2,hlh-30,madf-10,nhr-80,nhr-90,pha-4
chrI	2686861	2687012	False	False	.	.	cold	1	nhr-90
chrI	2687299	2687450	False	False	.	.	cold	2	daf-16,rpc-1
chrI	2687696	2687847	True	True	.	.	cold	7	cebp-1,elt-2,hlh-30,let-607,nhr-71,nhr-80,snpc-4
chrI	2688108	2688259	True	False	G3	stable	none	0	.
chrI	2688869	2689020	True	False	.	.	HOT	72	C04F5.9,C16A3.4,C34F6.9,F13H6.1,F23B12.7,F37D6.2,F49E8.2,M03D4.4,R02D3.7,aly-1,aly-2,athp-1,cebp-1,ceh-28,ceh-31,ceh-36,ceh-82,ces-1,cog-1,crh-2,dpl-1,dsc-1,duxl-1,dve-1,efl-1,egl-13,elt-2,elt-3,fkh-8,fos-1,him-1,hlh-30,hmg-11,irx-1,lin-35,lir-3,lsy-12,lsy-2,madf-10,mdl-1,nhr-10,nhr-102,nhr-20,nhr-21,nhr-23,nhr-232,nhr-25,nhr-47,nhr-71,nhr-85,nhr-90,pha-4,rbr-2,ref-2,rnt-1,sma-3,sma-9,snpc-1.1,sn…
chrI	2689408	2689559	True	False	I1	stable	HOT	21	F13H6.1,blmp-1,cebp-1,daf-16,dpl-1,dve-1,elt-2,fos-1,hlh-30,jun-1,let-607,lin-35,lsy-2,mdl-1,nhr-48,nhr-80,pha-4,pqm-1,rnt-1,sma-9,snpc-4
chrI	2690171	2690322	True	False	.	.	cold	2	rnt-1,rpc-1
chrI	2690432	2690583	True	False	.	.	cold	15	F13H6.1,crh-2,daf-16,dve-1,elt-2,fos-1,hlh-30,nhr-48,nhr-80,nhr-90,pha-4,pqm-1,rpc-1,sma-3,sma-9
chrI	2697139	2697290	True	False	Mix4	stable	cold	3	ceh-31,ces-1,unc-42
chrI	2703291	2703442	True	False	Mix2	stable	cold	14	cog-1,dsc-1,efl-1,egl-5,eor-1,hlh-1,hlh-8,hmg-11,rnt-1,sdc-2,snu-23,swsn-7,unc-55,ztf-11
chrI	2704476	2704627	False	False	.	.	none	0	.
chrI	2705762	2705913	True	False	.	.	none	0	.
chrI	2706138	2706289	True	False	Mix2	stable	cold	12	C34F6.9,ceh-18,dsc-1,egl-5,hlh-30,hlh-8,lsy-2,rnt-1,sma-9,snu-23,unc-55,ztf-11
chrI	2707211	2707362	True	False	.	.	cold	1	unc-55
chrI	2708326	2708477	True	False	.	.	cold	1	hmg-11
chrI	2709607	2709758	True	False	.	.	cold	9	ceh-31,ces-1,dsc-1,elt-2,lim-6,mls-2,nhr-80,pqm-1,unc-42
chrI	2710926	2711077	True	False	.	.	cold	5	ceh-31,ets-7,hlh-1,nfya-1,pha-4
chrI	2711280	2711431	True	False	.	.	none	0	.
chrI	2722881	2723032	True	False	.	.	none	0	.
chrI	2723200	2723351	True	False	.	.	none	0	.
chrI	2723534	2723685	True	False	.	.	none	0	.
chrI	2726291	2726442	False	False	.	.	none	0	.
chrI	2726656	2726807	True	False	G4	stable	HOT	22	C34F6.9,ces-1,crh-2,dpl-1,dve-1,efl-1,elt-3,eor-1,hmg-11,lin-35,lsy-2,nfya-1,nhr-47,nhr-71,pha-4,snpc-3.4,snu-23,sptf-1,swsn-7,unc-130,unc-55,xbp-1
chrI	2727063	2727214	False	False	.	.	none	0	.
chrI	2727643	2727794	True	False	Mix1	stable	HOT	36	C34F6.9,F13H6.1,cebp-1,ceh-18,ceh-31,ces-1,cog-1,crh-2,daf-16,dpl-1,dsc-1,dve-1,efl-1,elt-2,elt-3,eor-1,hmg-11,lin-35,lsy-2,mdl-1,nfya-1,nhr-20,nhr-21,nhr-47,nhr-71,pag-3,rbr-2,rnt-1,snpc-4,snu-23,swsn-7,tbx-2,unc-42,unc-55,xbp-1,xnd-1
chrI	2728779	2728930	True	False	I2	stable	HOT	29	F13H6.1,cebp-1,ceh-18,ceh-28,daf-16,dve-1,efl-1,egl-5,elt-2,elt-3,eor-1,fkh-10,fos-1,hlh-1,hlh-6,lin-35,lsy-2,nfya-1,nhr-25,nhr-71,nhr-80,pha-4,repo-1,rnt-1,sma-3,snpc-4,snu-23,unc-130,unc-55
chrI	2738315	2738466	True	False	.	.	cold	2	ces-1,unc-55
chrI	2739474	2739625	True	False	.	.	cold	1	zip-8
chrI	2740063	2740214	True	False	.	.	cold	7	aly-1,ceh-36,ces-1,hlh-6,sptf-1,tbx-2,zip-8
chrI	2740945	2741096	True	False	.	.	cold	3	ceh-31,ces-1,unc-42
chrI	2741210	2741361	True	False	.	.	cold	2	ceh-31,ces-1
chrI	2742314	2742465	True	False	.	.	none	0	.
chrI	2742966	2743117	True	False	.	.	cold	1	ces-1
chrI	2744956	2745107	True	False	.	.	none	0	.
chrI	2745975	2746126	True	False	.	.	cold	4	M03D4.4,ces-1,mls-2,sptf-1
chrI	2746631	2746782	True	False	.	.	none	0	.
chrI	2746828	2746979	True	False	.	.	none	0	.
chrI	2747652	2747803	True	False	.	.	cold	2	snu-23,vab-15
chrI	2747795	2747946	True	False	Mix2	stable	cold	2	snu-23,vab-15
chrI	2749182	2749333	True	False	.	.	cold	1	unc-55
chrI	2749464	2749615	True	False	.	.	cold	1	zip-8
chrI	2750849	2751000	True	False	.	.	none	0	.
chrI	2751117	2751268	True	True	.	.	none	0	.
chrI	2752179	2752330	True	False	.	.	none	0	.
chrI	2753044	2753195	True	False	.	.	cold	6	aly-1,ceh-31,ceh-34,ces-1,daf-16,pha-4
chrI	2754167	2754318	True	False	.	.	cold	1	unc-42
chrI	2755207	2755358	False	False	.	.	cold	4	ceh-79,fkh-10,unc-42,xnd-1
chrI	2755506	2755657	True	False	.	.	cold	2	ces-1,unc-42
chrI	2758266	2758417	False	False	stable	stable	cold	1	nhr-25
chrI	2758665	2758816	True	False	G1	stable	cold	2	efl-1,xnd-1
chrI	2761001	2761152	True	True	I2	I	cold	13	daf-16,dve-1,elt-2,elt-3,eor-1,hlh-30,mdl-1,nhr-102,nhr-48,nhr-80,nhr-90,pag-3,snu-23
chrI	2762188	2762339	True	False	.	.	none	0	.
chrI	2773894	2774045	True	False	Mix3	stable	cold	11	crh-2,dpl-1,dve-1,efl-1,elt-2,elt-3,lin-35,lsy-2,nhr-23,nhr-25,snu-23
chrI	2774998	2775149	False	False	.	.	none	0	.
chrI	2776204	2776355	False	False	stable	stable	HOT	74	C04F5.9,C16A3.4,C34F6.9,F13H6.1,F23B12.7,R02D3.7,aly-2,blmp-1,cebp-1,ceh-18,ceh-2,ceh-28,ceh-31,ceh-82,ceh-90,ces-1,crh-2,daf-16,dpl-1,dsc-1,duxl-1,dve-1,efl-1,egl-13,elt-2,elt-3,eor-1,ets-4,fkh-8,fos-1,hif-1,hlh-1,hlh-30,hlh-8,hmg-11,irx-1,jun-1,lim-6,lin-35,lir-3,lsy-12,lsy-2,mdl-1,nfya-1,nhr-20,nhr-21,nhr-23,nhr-25,nhr-47,nhr-71,nhr-80,nhr-85,nhr-90,rbr-2,ref-2,rnt-1,sem-4,skn-1,sma-3,snpc-1.1…
chrI	2777470	2777621	False	False	stable	stable	cold	1	ztf-26
chrI	2778151	2778302	True	False	.	.	cold	2	snpc-1.1,snpc-4
chrI	2778412	2778563	True	True	.	.	cold	2	snpc-1.1,snpc-4
chrI	2778782	2778933	True	False	Mix8	stable	none	0	.
chrI	2780095	2780246	True	False	Mix1	stable	none	0	.
chrI	2785983	2786134	True	False	H	stable	none	0	.
chrI	2791501	2791652	True	True	I2	I	cold	4	elt-2,fos-1,nhr-80,pqm-1
chrI	2800856	2801007	True	False	I1	stable	cold	12	crh-2,daf-16,dve-1,elt-2,eor-1,fos-1,jun-1,nhr-80,nhr-90,pha-4,pqm-1,sma-9
chrI	2801867	2802018	False	False	.	.	cold	4	daf-16,fos-1,nhr-80,pqm-1
chrI	2803632	2803783	False	False	.	.	none	0	.
chrI	2818602	2818753	True	True	H	I+H [2]	none	0	.
chrI	2825829	2825980	True	False	.	.	none	0	.
chrI	2826981	2827132	True	False	.	.	cold	5	ceh-31,ets-7,mls-2,pop-1,sptf-1
chrI	2827494	2827645	True	False	.	.	cold	1	unc-55
chrI	2829186	2829337	True	False	.	.	cold	7	ceh-36,cog-1,mls-2,pop-1,ref-2,tbx-2,zip-8
chrI	2830355	2830506	False	False	stable	stable	HOT	21	ceh-31,ceh-90,dpl-1,dsc-1,efl-1,egl-13,fkh-8,hif-1,hlh-1,hmbx-1,hmg-11,irx-1,lin-35,lsy-2,nhr-47,nhr-71,ref-2,rnt-1,snu-23,unc-55,unc-86
chrI	2830805	2830956	True	False	.	.	cold	3	efl-1,unc-130,xnd-1
chrI	2831508	2831659	True	False	Mix7	stable	HOT	33	F13H6.1,M03D4.4,aly-1,ceh-31,ces-1,cog-1,daf-16,die-1,dve-1,elt-2,ets-7,hlh-1,hlh-6,hlh-8,hmg-11,lin-35,mls-2,nfya-1,nhr-232,pop-1,pros-1,ref-2,rnt-1,sdc-2,snu-23,sptf-1,swsn-7,syd-9,tbx-2,unc-42,unc-55,unc-86,ztf-11
chrI	2831839	2831990	False	False	.	.	cold	6	blmp-1,dve-1,elt-2,fos-1,nhr-80,pqm-1
chrI	2833318	2833469	True	False	.	.	cold	3	snu-23,unc-86,ztf-11
chrI	2834251	2834402	True	False	.	.	cold	2	hlh-1,unc-55
chrI	2835356	2835507	False	False	.	.	cold	9	daf-16,dve-1,elt-2,fos-1,hlh-30,mdl-1,nhr-80,pop-1,pqm-1
chrI	2835759	2835910	True	False	.	.	none	0	.
chrI	2836926	2837077	True	False	Mix7	stable	cold	1	ref-2
chrI	2837867	2838018	True	False	.	.	cold	2	ceh-22,tbx-2
chrI	2838436	2838587	True	False	.	.	none	0	.
chrI	2839724	2839875	True	False	.	.	cold	4	nhr-25,nhr-85,rnt-1,snu-23
chrI	2841022	2841173	True	False	.	.	cold	2	ceh-34,pha-4
chrI	2842176	2842327	True	False	.	.	cold	3	ces-1,elt-1,rnt-1
chrI	2844236	2844387	True	False	.	.	cold	5	aly-1,ceh-31,ces-1,pop-1,sptf-1
chrI	2844483	2844634	True	False	.	.	cold	8	aly-1,blmp-1,elt-1,nhr-25,nhr-85,pop-1,rnt-1,snu-23
chrI	2845625	2845776	True	False	Mix5	stable	cold	1	ceh-31
chrI	2848485	2848636	False	False	.	.	cold	5	crh-2,elt-2,fos-1,nhr-80,pqm-1
chrI	2850850	2851001	True	False	.	.	cold	1	lsy-2
chrI	2853811	2853962	False	False	stable	stable	cold	3	madf-10,pha-4,sma-3
chrI	2855020	2855171	False	False	.	.	none	0	.
chrI	2856446	2856597	True	False	.	.	cold	1	pha-4
chrI	2857703	2857854	True	True	I2	I+H [2]	HOT	27	F13H6.1,atf-7,cebp-1,crh-2,daf-16,dve-1,elt-2,elt-3,eor-1,fos-1,hif-1,hlh-30,let-607,lsy-2,madf-10,mdl-1,nhr-20,nhr-21,nhr-23,nhr-25,nhr-71,nhr-80,nhr-90,pha-4,pqm-1,sma-3,snu-23
chrI	2859858	2860009	True	False	Mix1	stable	cold	2	F13H6.1,pha-4
chrI	2861128	2861279	True	False	Mix1	stable	cold	13	C34F6.9,daf-16,efl-1,eor-1,hlh-1,lin-35,lsy-2,nhr-20,nhr-71,pha-4,rnt-1,snu-23,unc-55
chrI	2861651	2861802	True	False	G2	stable	cold	1	xnd-1
chrI	2861885	2862036	True	False	Mix8	stable	cold	6	dpl-1,egl-13,hlh-30,nhr-20,pha-4,snu-23
chrI	2864082	2864233	True	False	.	.	HOT	63	C04F5.9,C34F6.9,F13H6.1,F37D6.2,R02D3.7,atf-7,athp-1,cebp-1,ceh-18,ceh-2,ceh-28,ceh-31,ceh-48,ceh-79,crh-2,daf-16,dpl-1,dsc-1,duxl-1,dve-1,efl-1,egl-13,egl-5,elt-2,eor-1,fkh-8,hif-1,him-1,hlh-30,hmg-11,irx-1,jun-1,lin-35,lsy-12,lsy-2,madf-10,mdl-1,mef-2,nfya-1,nhr-102,nhr-20,nhr-47,nhr-48,nhr-71,nhr-80,nhr-90,pha-4,pros-1,rbr-2,rnt-1,sem-4,sma-3,sma-9,snpc-4,snu-23,swsn-7,tbx-2,unc-55,unc-86,xbp-…
chrI	2866288	2866439	False	False	stable	stable	cold	6	daf-16,dve-1,elt-2,nhr-80,pha-4,skn-1
chrI	2869937	2870088	False	False	.	.	HOT	31	B0035.1,C34F6.9,F22D6.2,F52B5.7,athp-1,cebp-1,ceh-14,ceh-79,daf-16,die-1,eor-1,hif-1,hlh-30,hmg-11,jun-1,lsy-2,mdl-1,nhr-102,nhr-71,nhr-80,nhr-90,pha-4,rbr-2,repo-1,snpc-4,snu-23,spr-1,swsn-7,unc-130,unc-55,xnd-1
chrI	2875199	2875350	True	False	G1	stable	cold	14	F49E8.2,atf-7,ceh-82,duxl-1,lsy-2,nhr-21,nhr-76,repo-1,snpc-1.1,snpc-4,snu-23,swsn-7,unc-130,xnd-1
chrI	2875482	2875633	True	False	.	.	cold	3	cebp-1,die-1,unc-130
chrI	2876077	2876228	True	False	.	.	none	0	.
chrI	2876503	2876654	False	False	stable	stable	HOT	90	C04F5.9,C16A3.4,C34F6.9,F13H6.1,F23B12.7,F37D6.2,F49E8.2,R02D3.7,ZK546.5,aha-1,atf-7,blmp-1,cebp-1,ceh-14,ceh-18,ceh-28,ceh-30,ceh-31,ceh-34,ceh-82,ces-1,cog-1,crh-2,daf-16,dao-5,die-1,dpl-1,dsc-1,dve-1,efl-1,elt-2,elt-3,eor-1,ets-4,fkh-8,fos-1,hif-1,him-1,hlh-1,hlh-30,hmg-11,irx-1,jun-1,let-607,lin-35,lsy-12,lsy-2,madf-10,mdl-1,mls-2,nfya-1,nhr-102,nhr-20,nhr-21,nhr-23,nhr-25,nhr-47,nhr-48,nhr-7…
chrI	2876648	2876799	False	False	stable	stable	HOT	80	C16A3.4,C34F6.9,F13H6.1,F23B12.7,F37D6.2,F49E8.2,M03D4.4,R02D3.7,ZK546.5,aha-1,atf-7,blmp-1,cebp-1,ceh-18,ceh-28,ceh-30,ceh-31,ceh-34,ces-1,cog-1,crh-2,daf-16,dao-5,die-1,dpl-1,dsc-1,dve-1,efl-1,elt-2,elt-3,eor-1,fkh-8,fos-1,hif-1,hlh-1,hlh-30,jun-1,let-607,lin-35,lsy-12,lsy-2,madf-10,mdl-1,mls-2,nfya-1,nhr-102,nhr-20,nhr-21,nhr-23,nhr-25,nhr-47,nhr-48,nhr-71,nhr-80,nhr-90,pag-3,pax-1,pha-4,pqm-1…
chrI	2878650	2878801	True	False	.	.	HOT	52	B0035.1,B0261.1,C04F5.9,F13H6.1,F22D6.2,F52B5.7,F57C9.4,T26A5.8,aly-2,atf-7,athp-1,cebp-1,ceh-28,ceh-62,ceh-79,ceh-82,daf-16,dpff-1,duxl-1,dve-1,efl-1,elt-2,elt-3,him-1,hlh-30,let-607,lsy-12,lsy-2,madf-10,mxl-1,nhr-102,nhr-21,nhr-23,nhr-47,nhr-48,nhr-71,nhr-80,nhr-90,pha-4,rbr-2,repo-1,rnt-1,sem-4,sma-3,snpc-3.4,snpc-4,snu-23,spr-1,tbx-2,xnd-1,ztf-26,ztf-4
chrI	2887301	2887452	True	False	.	.	cold	5	ceh-31,ces-1,dsc-1,snu-23,zip-8
chrI	2887714	2887865	True	False	Mix7	stable	cold	1	zip-8
chrI	2888792	2888943	True	False	.	.	cold	3	aly-1,hlh-1,hlh-6
chrI	2889520	2889671	True	False	.	.	none	0	.
chrI	2890357	2890508	True	False	.	.	cold	1	zip-8
chrI	2890690	2890841	True	False	.	.	none	0	.
chrI	2895108	2895259	True	False	.	.	HOT	19	C34F6.9,aly-2,athp-1,cebp-1,ces-1,daf-16,dpl-1,dve-1,efl-1,elt-3,eor-1,hmg-11,lin-35,lsy-2,nhr-102,nhr-71,snu-23,tbx-2,unc-55
chrI	2901021	2901172	True	False	G4	stable	HOT	43	C04F5.9,C16A3.4,C34F6.9,F13H6.1,ZK546.5,cebp-1,ceh-28,ceh-30,ceh-82,ces-1,crh-2,dpl-1,dsc-1,dve-1,efl-1,egl-5,elt-2,eor-1,fos-1,hlh-30,hmg-11,let-607,lin-35,lsy-2,mdl-1,nhr-25,nhr-47,nhr-71,nhr-80,pha-4,rbr-2,rnt-1,sem-4,skn-1,snpc-3.4,snpc-4,snu-23,sptf-1,swsn-7,unc-130,unc-55,unc-86,xbp-1
chrI	2904170	2904321	True	False	.	.	none	0	.
chrI	2905738	2905889	True	False	.	.	cold	1	xnd-1
chrI	2924781	2924932	True	False	Mix8	stable	cold	1	efl-1
chrI	2925100	2925251	False	False	.	.	cold	1	unc-55
chrI	2928125	2928276	False	False	stable	stable	HOT	72	C04F5.9,C16A3.4,C34F6.9,F13H6.1,F23B12.7,F37D6.2,F49E8.2,R02D3.7,ZK546.5,atf-7,athp-1,blmp-1,cebp-1,ceh-82,ces-1,crh-2,daf-16,dpl-1,dsc-1,dve-1,efl-1,elt-2,elt-3,eor-1,fkh-8,fos-1,hif-1,hlh-1,hlh-30,hmg-11,irx-1,jun-1,let-607,lin-35,lsy-12,lsy-2,madf-10,mdl-1,nfya-1,nhr-102,nhr-20,nhr-21,nhr-23,nhr-25,nhr-47,nhr-48,nhr-71,nhr-80,nhr-90,pax-1,pha-4,pqm-1,rbr-2,rnt-1,skn-1,sma-3,snpc-4,snu-23,spr-1…
chrI	2929661	2929812	True	False	G3	stable	HOT	75	B0035.1,C04F5.9,C16A3.4,C34F6.9,F13H6.1,F22D6.2,F23B12.7,F37D6.2,F49E8.2,F57C9.4,R02D3.7,ZK546.5,aly-2,atf-7,athp-1,cebp-1,ceh-28,ceh-79,ceh-82,ces-1,crh-2,daf-16,die-1,dpff-1,dpl-1,dsc-1,duxl-1,dve-1,efl-1,egl-13,elt-2,elt-3,eor-1,fos-1,hif-1,hmg-11,irx-1,let-607,lin-35,lir-3,lsy-12,lsy-2,madf-10,nfya-1,nhr-102,nhr-20,nhr-21,nhr-23,nhr-47,nhr-48,nhr-71,nhr-80,nhr-85,nhr-90,pha-4,rbr-2,repo-1,rnt…
chrI	2935661	2935812	False	True	stable	Mix2	HOT	109	B0261.1,C16A3.4,C34F6.9,F13H6.1,F37D6.2,F49E8.2,F52B5.7,M03D4.4,T07F8.4,T26A5.8,ahr-1,aly-1,atf-7,athp-1,cebp-1,ceh-18,ceh-2,ceh-31,ceh-34,ceh-36,ceh-48,ceh-79,ceh-82,ces-1,che-1,cog-1,crh-2,daf-16,die-1,dpl-1,dsc-1,duxl-1,dve-1,efl-1,egl-13,egl-5,elt-2,elt-3,eor-1,ets-4,ets-7,eyg-1,fax-1,fkh-10,fkh-8,fos-1,hif-1,him-1,hlh-1,hlh-15,hlh-30,hlh-6,hlh-8,hmbx-1,hmg-11,hnd-1,irx-1,jun-1,let-607,lim-6,…
chrI	2944686	2944837	True	False	.	.	cold	2	snpc-1.1,snpc-4
chrI	2944866	2945017	True	True	.	.	cold	2	snpc-1.1,snpc-4
chrI	2945479	2945630	False	False	.	.	cold	1	ztf-26
chrI	2945811	2945962	True	False	.	.	cold	3	hif-1,mdl-1,nhr-48
chrI	2959264	2959415	False	False	.	.	cold	2	cebp-1,nhr-80
chrI	2960618	2960769	True	False	.	.	cold	1	unc-86
chrI	2962106	2962257	False	False	.	.	cold	3	F13H6.1,ceh-18,pha-4
chrI	2962421	2962572	True	True	I2	I+H [1]	cold	8	daf-16,dve-1,elt-2,fos-1,nhr-80,pha-4,pqm-1,snpc-4
chrI	2964485	2964636	True	False	.	.	cold	1	zip-8
chrI	2965537	2965688	True	False	.	.	none	0	.
chrI	2966471	2966622	True	False	.	.	none	0	.
chrI	2967169	2967320	True	False	.	.	cold	1	ceh-36
chrI	2967716	2967867	True	False	.	.	cold	15	C34F6.9,blmp-1,egl-5,elt-1,eor-1,hlh-30,lin-35,nhr-20,nhr-25,nhr-85,rnt-1,sem-4,snu-23,tbx-2,unc-55
chrI	2969656	2969807	True	False	.	.	none	0	.
chrI	2970732	2970883	True	False	.	.	cold	1	ref-2
chrI	2971082	2971233	True	False	.	.	none	0	.
chrI	2974816	2974967	True	False	.	.	none	0	.
chrI	2976344	2976495	True	False	.	.	none	0	.
chrI	2978608	2978759	True	False	.	.	none	0	.
chrI	2979653	2979804	True	False	.	.	none	0	.
chrI	2984459	2984610	False	True	.	.	none	0	.
chrI	2985180	2985331	True	False	Mix6	stable	cold	6	M03D4.4,ceh-90,dsc-1,efl-1,snu-23,unc-55
chrI	2995979	2996130	True	False	Mix8	stable	HOT	28	C34F6.9,F13H6.1,F23B12.7,Y22D7AL.16,ahr-1,ceh-82,ces-1,cog-1,crh-2,daf-16,dsc-1,efl-1,egl-13,ets-4,him-1,hmg-11,lir-3,lsy-2,madf-10,nhr-21,nhr-23,pha-4,snpc-4,sptf-1,tbx-2,unc-55,zfp-2,ztf-18
chrI	2996294	2996445	False	False	stable	stable	HOT	96	B0035.1,C04F5.9,C16A3.4,C34F6.9,F13H6.1,F22D6.2,F37D6.2,F49E8.2,K02D7.2,R02D3.7,T07F8.4,Y22D7AL.16,ahr-1,athp-1,cebp-1,ceh-14,ceh-18,ceh-2,ceh-31,ceh-34,ceh-48,ceh-82,ceh-90,ces-1,cog-1,crh-2,daf-16,dpl-1,dsc-1,efl-1,egl-13,elt-2,eor-1,ets-4,ets-7,eyg-1,fax-1,fkh-10,fkh-8,hif-1,him-1,hlh-15,hlh-30,hlh-6,hlh-8,hmg-11,irx-1,jun-1,let-607,lim-6,lin-35,lir-3,lsy-2,madf-10,madf-2,mdl-1,mls-2,nfya-1,nh…
chrI	2996729	2996880	False	False	.	.	none	0	.
chrI	3004037	3004188	True	False	.	.	cold	6	C34F6.9,ceh-48,ces-1,hmg-11,snu-23,unc-42
chrI	3010416	3010567	True	False	H	stable	cold	3	eor-1,hlh-30,nhr-25
chrI	3011799	3011950	True	False	H	stable	cold	2	K02D7.2,nhr-25
chrI	3014749	3014900	False	False	.	.	cold	4	fkh-8,hlh-4,lsy-2,nhr-71
chrI	3015399	3015550	True	False	G4	stable	cold	12	ceh-82,dpl-1,efl-1,hif-1,hlh-30,hmg-11,lin-35,lsy-2,pha-4,snu-23,swsn-7,xbp-1
chrI	3015708	3015859	False	False	stable	stable	cold	1	hlh-30
chrI	3019830	3019981	True	False	.	.	cold	6	atf-7,cebp-1,daf-16,elt-2,nhr-80,pha-4
chrI	3023227	3023378	True	False	.	.	none	0	.
chrI	3032846	3032997	True	False	G4	stable	HOT	60	C04F5.9,C16A3.4,C34F6.9,F13H6.1,F37D6.2,R02D3.7,aly-2,cebp-1,ceh-28,ceh-31,ceh-82,ceh-90,ces-1,crh-2,dpl-1,dsc-1,duxl-1,dve-1,efl-1,egl-5,elt-2,elt-3,eor-1,fkh-8,hif-1,him-1,hlh-30,hmg-11,irx-1,jun-1,let-607,lin-35,lsy-2,mdl-1,mef-2,nfya-1,nhr-102,nhr-20,nhr-21,nhr-23,nhr-25,nhr-47,nhr-71,nhr-80,nhr-90,pha-4,rbr-2,sma-3,snpc-4,snu-23,swsn-7,tbx-2,unc-130,unc-55,unc-86,xbp-1,xnd-1,ztf-11,ztf-18,zt…
chrI	3035124	3035275	False	True	.	.	cold	1	cebp-1
chrI	3035947	3036098	False	False	.	.	cold	5	cebp-1,hif-1,lsy-2,snu-23,ztf-18
chrI	3038055	3038206	True	False	.	.	HOT	55	C04F5.9,C34F6.9,F13H6.1,F22D6.2,F37D6.2,athp-1,ceh-18,crh-2,dpl-1,dsc-1,duxl-1,dve-1,efl-1,egl-13,elt-2,elt-3,eor-1,fkh-8,hif-1,him-1,irx-1,let-607,lin-35,lir-3,lsy-12,lsy-2,madf-10,nhr-102,nhr-20,nhr-21,nhr-23,nhr-25,nhr-47,nhr-48,nhr-71,nhr-80,nhr-85,nhr-90,rbr-2,rec-8,rnt-1,sma-3,snpc-4,snu-23,spr-1,swsn-7,tbx-2,unc-130,unc-86,xbp-1,xnd-1,zfp-2,ztf-11,ztf-18,ztf-26
chrI	3049445	3049596	True	True	I2	Mix3	cold	2	blmp-1,nhr-23
chrI	3059139	3059290	False	False	stable	stable	cold	15	C34F6.9,ceh-2,ceh-31,ceh-90,ces-1,dsc-1,ets-4,hmg-11,lsy-2,nhr-47,nhr-90,pha-4,unc-42,unc-55,xbp-1
chrI	3070090	3070241	False	False	stable	stable	HOT	43	C04F5.9,C16A3.4,C34F6.9,F37D6.2,cebp-1,ceh-48,ceh-82,ceh-90,ces-1,crh-2,daf-16,dpl-1,dsc-1,dve-1,efl-1,egl-13,elt-3,eor-1,fos-1,hif-1,him-1,hmg-11,irx-1,jun-1,lin-35,lsy-2,mdl-1,nhr-20,nhr-21,nhr-23,nhr-47,nhr-90,pha-4,rbr-2,sma-3,snu-23,swsn-7,unc-130,unc-42,unc-55,unc-86,vab-15,xbp-1
chrI	3085144	3085295	True	False	.	.	none	0	.
chrI	3085398	3085549	True	False	.	.	cold	6	cebp-1,daf-16,dve-1,elt-2,nhr-80,pqm-1
chrI	3087190	3087341	True	False	.	.	none	0	.
chrI	3089163	3089314	True	False	.	.	none	0	.
chrI	3089791	3089942	True	False	.	.	none	0	.
chrI	3094265	3094416	True	False	.	.	cold	2	let-607,nhr-80
chrI	3096263	3096414	False	False	stable	stable	HOT	30	C16A3.4,C34F6.9,R02D3.7,cebp-1,ces-1,crh-2,daf-16,dpl-1,dve-1,efl-1,elt-2,fkh-10,hlh-30,hmg-11,lin-35,lsy-2,mdl-1,nfya-1,nhr-20,nhr-23,nhr-47,nhr-71,pha-4,sma-3,snpc-4,snu-23,swsn-7,unc-55,unc-86,xbp-1
chrI	3097465	3097616	False	False	.	.	cold	1	unc-55
chrI	3098511	3098662	False	True	.	.	cold	1	cebp-1
chrI	3098785	3098936	False	True	.	.	none	0	.
chrI	3099949	3100100	True	False	.	.	none	0	.
chrI	3100924	3101075	True	False	.	.	cold	2	unc-86,vab-15
chrI	3101801	3101952	False	False	.	.	HOT	36	C34F6.9,F13H6.1,cebp-1,ceh-18,ceh-31,ceh-34,ceh-36,dpl-1,dve-1,elt-2,eor-1,fos-1,hlh-1,hlh-30,hlh-6,hlh-8,hmg-11,lin-35,lsy-2,mls-2,nhr-20,nhr-23,nhr-47,nhr-71,nhr-80,nhr-90,pha-4,pqm-1,pros-1,rnt-1,snpc-4,snu-23,swsn-7,tbx-2,xbp-1,ztf-11
chrI	3102199	3102350	False	False	.	.	cold	2	ceh-48,dsc-1
chrI	3103188	3103339	True	False	I2	stable	cold	9	crh-2,daf-16,dve-1,elt-2,hlh-30,mdl-1,nhr-80,pqm-1,snu-23
chrI	3105186	3105337	True	False	.	.	cold	2	ceh-31,unc-55
chrI	3105536	3105687	True	False	.	.	cold	5	efl-1,him-1,snpc-3.4,unc-130,xnd-1
chrI	3105783	3105934	True	False	.	.	cold	3	snpc-3.4,unc-130,xnd-1
chrI	3106566	3106717	True	False	.	.	cold	3	aly-1,pax-1,snu-23
chrI	3110728	3110879	False	False	stable	stable	none	0	.
chrI	3113687	3113838	True	True	.	.	cold	17	crh-2,daf-16,dve-1,elt-2,fos-1,hlh-30,jun-1,let-607,madf-10,mdl-1,nhr-102,nhr-71,nhr-80,nhr-90,pha-4,pqm-1,sma-9
chrI	3114017	3114168	True	False	.	.	cold	4	elt-2,nhr-80,pqm-1,sma-3
chrI	3117412	3117563	False	False	.	.	cold	1	hlh-30
chrI	3119100	3119251	True	False	I1	stable	HOT	29	F13H6.1,atf-7,cebp-1,crh-2,daf-16,dpl-1,dve-1,elt-2,elt-3,eor-1,fos-1,hlh-30,jun-1,let-607,lsy-2,madf-10,mdl-1,nhr-102,nhr-20,nhr-48,nhr-71,nhr-80,nhr-90,pha-4,pqm-1,sma-3,sma-9,snu-23,ztf-26
chrI	3121751	3121902	True	False	.	.	cold	9	cebp-1,elt-3,let-607,nhr-23,nhr-25,nhr-71,nhr-85,snu-23,unc-55
chrI	3122057	3122208	True	False	.	.	cold	15	atf-7,blmp-1,daf-16,dve-1,elt-2,fos-1,mdl-1,nhr-20,nhr-71,nhr-80,nhr-90,pqm-1,sma-3,sma-9,snu-23
chrI	3123715	3123866	False	False	.	.	none	0	.
chrI	3129734	3129885	False	False	.	.	cold	6	daf-16,dve-1,elt-2,fos-1,nhr-80,pqm-1
chrI	3137053	3137204	True	False	H	stable	none	0	.
chrI	3140605	3140756	True	False	Mix3	stable	cold	2	mdl-1,snu-23
chrI	3143151	3143302	False	True	stable	I+H [2]	cold	7	dpl-1,elt-3,lin-35,mdl-1,sma-3,snu-23,unc-130
chrI	3147847	3147998	False	False	stable	stable	HOT	51	C04F5.9,C16A3.4,C34F6.9,F13H6.1,F23B12.7,aly-2,cebp-1,ceh-18,ceh-28,ceh-30,ceh-48,ceh-82,ces-1,crh-2,daf-16,dpl-1,dsc-1,dve-1,efl-1,egl-13,elt-3,hif-1,hlh-30,hmg-11,irx-1,jun-1,lin-35,lsy-2,mdl-1,nfya-1,nhr-20,nhr-21,nhr-23,nhr-25,nhr-47,nhr-71,nhr-90,rbr-2,ref-2,rnt-1,sma-3,sma-9,snpc-1.1,snpc-3.4,snpc-4,snu-23,swsn-7,unc-55,unc-86,xbp-1,ztf-11
chrI	3148091	3148242	False	False	.	.	none	0	.
chrI	3151342	3151493	True	False	.	.	none	0	.
chrI	3152117	3152268	True	False	G2	stable	none	0	.
chrI	3152489	3152640	True	True	G2	I+H [1]	cold	13	F23B12.7,F49E8.2,athp-1,cebp-1,him-1,nhr-90,rpc-1,snpc-1.1,snpc-3.4,snpc-4,unc-130,xnd-1,ztf-18
chrI	3154658	3154809	False	False	.	.	cold	2	egl-5,rnt-1
chrI	3156731	3156882	True	False	.	.	none	0	.
chrI	3158358	3158509	True	True	.	.	cold	1	F52B5.7
chrI	3158745	3158896	False	False	.	.	none	0	.
chrI	3162537	3162688	False	False	stable	stable	HOT	74	C16A3.4,C34F6.9,F13H6.1,F23B12.7,F37D6.2,F49E8.2,R02D3.7,ZK546.5,aly-2,cebp-1,ceh-18,ceh-30,ceh-31,ceh-34,ceh-82,ces-1,crh-2,daf-16,dpl-1,dsc-1,dve-1,efl-1,egl-13,egl-5,elt-2,elt-3,eor-1,fkh-8,fos-1,hif-1,him-1,hlh-1,hlh-30,hmg-11,irx-1,jun-1,let-607,lin-35,lsy-12,lsy-2,madf-10,mdl-1,nfya-1,nhr-20,nhr-21,nhr-23,nhr-25,nhr-47,nhr-71,nhr-80,nhr-90,pax-1,pha-4,pqm-1,rbr-2,rnt-1,sem-4,skn-1,sma-3,snp…
chrI	3176524	3176675	False	False	.	.	HOT	75	C04F5.9,C16A3.4,C34F6.9,F13H6.1,F23B12.7,R02D3.7,ahr-1,ceh-14,ceh-18,ceh-2,ceh-31,ceh-34,ceh-48,ceh-82,ceh-90,ces-1,cog-1,crh-2,daf-16,dpl-1,dsc-1,dve-1,efl-1,egl-13,eor-1,ets-4,ets-7,eyg-1,fax-1,fkh-8,fos-1,hif-1,hlh-15,hlh-8,hmg-11,hnd-1,irx-1,let-607,lim-6,lin-35,lir-3,lsy-2,madf-10,mdl-1,nfya-1,nhr-20,nhr-23,nhr-47,nhr-71,nhr-80,nhr-90,pha-4,pqm-1,rbr-2,rec-8,rnt-1,sma-3,snpc-4,snu-23,spr-1,s…
chrI	3192543	3192694	True	False	.	.	cold	12	C34F6.9,cebp-1,ceh-31,dve-1,efl-1,eor-1,lin-35,lsy-2,nhr-20,nhr-80,pha-4,unc-55
chrI	3192681	3192832	True	False	Mix6	stable	cold	12	C34F6.9,cebp-1,ceh-31,dve-1,efl-1,eor-1,lin-35,lsy-2,nhr-20,nhr-80,pha-4,unc-55
chrI	3194864	3195015	False	False	.	.	none	0	.
chrI	3195955	3196106	False	True	.	.	none	0	.
chrI	3198968	3199119	True	False	G2	stable	cold	9	F49E8.2,athp-1,efl-1,him-1,snpc-1.1,snpc-3.4,snpc-4,unc-130,xnd-1
chrI	3205123	3205274	True	True	I2	I	cold	2	nhr-23,sma-3
chrI	3205457	3205608	False	False	.	.	cold	2	nfya-1,sma-3
chrI	3206478	3206629	True	True	I2	I+H [2]	cold	1	nhr-23
chrI	3207790	3207941	False	False	.	.	none	0	.
chrI	3210403	3210554	True	False	G1	stable	cold	1	lsy-2
chrI	3212428	3212579	True	False	.	.	none	0	.
chrI	3216838	3216989	True	False	.	.	none	0	.
chrI	3218826	3218977	False	True	.	.	cold	2	daf-16,nhr-80
chrI	3222774	3222925	False	False	.	.	cold	1	unc-86
chrI	3223002	3223153	True	False	Mix8	stable	HOT	31	C16A3.4,C34F6.9,ceh-82,ces-1,dpl-1,dsc-1,dve-1,efl-1,elt-2,elt-3,eor-1,fkh-8,fos-1,hlh-30,lin-35,lsy-2,nhr-23,nhr-47,nhr-80,pha-4,rbr-2,sem-4,snpc-4,snu-23,swsn-7,unc-130,unc-55,unc-86,xbp-1,ztf-18,ztf-7
chrI	3228023	3228174	False	False	stable	stable	HOT	34	C04F5.9,C16A3.4,C34F6.9,ceh-31,ceh-82,ces-1,crh-2,dpl-1,dve-1,efl-1,eor-1,fkh-8,hmg-11,jun-1,lin-35,lsy-2,mdl-1,nfya-1,nhr-20,nhr-25,nhr-47,nhr-71,nhr-80,nhr-90,pha-4,rbr-2,skn-1,sma-3,snpc-4,snu-23,swsn-7,unc-55,unc-86,xbp-1
chrI	3246257	3246408	False	False	.	.	cold	1	nhr-25
chrI	3246547	3246698	True	False	.	.	cold	5	Y22D7AL.16,ceh-31,nfya-1,nhr-25,snu-23
chrI	3247098	3247249	True	False	.	.	cold	6	cebp-1,fos-1,hlh-30,mdl-1,nhr-90,pha-4
chrI	3247419	3247570	True	False	.	.	cold	8	cebp-1,daf-16,elt-2,fos-1,nhr-80,nhr-90,pqm-1,tbx-2
chrI	3247899	3248050	True	False	.	.	cold	4	daf-16,elt-2,eor-1,pqm-1
chrI	3248175	3248326	True	False	Mix2	stable	cold	5	elt-2,hmg-11,nhr-232,snu-23,ztf-11
chrI	3248625	3248776	True	False	Mix2	stable	cold	17	ceh-2,ceh-22,ceh-31,daf-16,dpl-1,gmeb-2,hlh-30,jun-1,lin-35,mdl-1,nhr-20,nhr-47,nhr-71,pha-2,pha-4,rnt-1,snu-23
chrI	3249126	3249277	True	False	Mix3	stable	cold	15	crh-2,daf-16,dve-1,elt-2,eor-1,fos-1,hlh-30,let-607,lsy-2,madf-10,mdl-1,nhr-80,nhr-90,pha-4,pqm-1
chrI	3250664	3250815	True	False	Mix4	stable	cold	4	F13H6.1,ceh-14,dsc-1,fkh-8
chrI	3250840	3250991	True	False	.	.	cold	4	F13H6.1,ceh-14,dsc-1,fkh-8
chrI	3251177	3251328	False	True	.	.	cold	1	blmp-1
chrI	3256133	3256284	False	True	.	.	cold	2	aly-2,sma-3
chrI	3257972	3258123	False	True	.	.	none	0	.
chrI	3265372	3265523	True	True	Mix8	Mix5	cold	1	unc-130
chrI	3266001	3266152	False	False	stable	stable	HOT	58	C04F5.9,C16A3.4,C34F6.9,F13H6.1,F37D6.2,R02D3.7,athp-1,cebp-1,ceh-18,ceh-28,ceh-30,ceh-48,ceh-82,ces-1,crh-2,daf-16,dpl-1,dsc-1,dve-1,efl-1,egl-13,elt-3,eor-1,fkh-8,fos-1,hlh-30,hmg-11,irx-1,jun-1,lin-35,lsy-12,lsy-2,mdl-1,nhr-20,nhr-21,nhr-23,nhr-25,nhr-47,nhr-71,nhr-80,nhr-90,pha-4,rbr-2,rnt-1,sem-4,sma-3,sma-9,snpc-4,snu-23,sptf-1,swsn-7,tbx-2,unc-130,unc-55,unc-86,xbp-1,ztf-11,ztf-18
chrI	3266700	3266851	True	False	G4	stable	HOT	91	C04F5.9,C16A3.4,C34F6.9,F13H6.1,F23B12.7,F37D6.2,F49E8.2,R02D3.7,ZK546.5,aha-1,aly-2,atf-7,blmp-1,cebp-1,ceh-18,ceh-28,ceh-31,ceh-34,ceh-82,ceh-90,ces-1,cog-1,crh-2,daf-16,dpl-1,dsc-1,duxl-1,dve-1,efl-1,egl-13,egl-5,elt-2,elt-3,eor-1,fkh-10,fkh-8,fos-1,hif-1,him-1,hlh-1,hlh-30,hmg-11,irx-1,jun-1,let-607,lin-35,lir-3,lsy-12,lsy-2,madf-10,madf-2,mdl-1,nfya-1,nhr-10,nhr-102,nhr-20,nhr-21,nhr-23,nhr-…
chrI	3267087	3267238	False	False	stable	stable	none	0	.
chrI	3269147	3269298	True	False	.	.	cold	8	F49E8.2,aly-2,athp-1,daf-16,snpc-3.4,snpc-4,unc-130,xnd-1
chrI	3269636	3269787	False	False	.	.	none	0	.
chrI	3277895	3278046	True	True	Mix1	I+H [2]	cold	9	aha-1,blmp-1,hlh-30,mdl-1,nhr-20,nhr-25,pag-3,sma-3,snu-23
chrI	3280813	3280964	True	True	.	.	cold	3	blmp-1,elt-1,nhr-25
chrI	3281761	3281912	True	True	Mix3	I+H [2]	cold	2	blmp-1,nhr-25
chrI	3282978	3283129	True	False	.	.	cold	4	blmp-1,hlh-30,mdl-1,nhr-25
chrI	3284353	3284504	True	False	.	.	none	0	.
chrI	3287380	3287531	True	False	.	.	none	0	.
chrI	3292858	3293009	True	False	.	.	cold	3	him-1,nhr-90,snu-23
chrI	3293322	3293473	True	True	.	.	cold	3	him-1,snpc-1.1,snpc-4
chrI	3293865	3294016	False	True	.	.	cold	1	nhr-25
chrI	3295374	3295525	True	False	.	.	cold	3	daf-16,hlh-30,nhr-71
chrI	3296036	3296187	False	False	.	.	cold	5	atf-7,daf-16,fkh-8,hif-1,snu-23
chrI	3297135	3297286	True	False	I1	stable	HOT	27	C16A3.4,C34F6.9,F23B12.7,cebp-1,crh-2,daf-16,dpl-1,dve-1,elt-2,elt-3,eor-1,hif-1,hlh-30,jun-1,lsy-2,mdl-1,nhr-20,nhr-23,nhr-25,nhr-71,nhr-80,nhr-90,pqm-1,sma-3,sma-9,snu-23,ztf-26
chrI	3298279	3298430	True	False	Mix3	stable	cold	7	elt-3,eor-1,hif-1,nhr-71,sma-9,snu-23,unc-42
chrI	3307408	3307559	True	False	.	.	cold	2	hlh-30,unc-42
chrI	3307949	3308100	True	False	N+M	stable	none	0	.
chrI	3309692	3309843	True	True	I1	I+H [2]	cold	15	cebp-1,crh-2,daf-16,dpl-1,dve-1,efl-1,elt-2,eor-1,fos-1,hif-1,hlh-30,nhr-80,pha-4,pqm-1,sma-3
chrI	3311204	3311355	False	False	stable	stable	none	0	.
chrI	3313192	3313343	True	False	.	.	none	0	.
chrI	3316619	3316770	True	False	I2	stable	cold	16	C34F6.9,F13H6.1,cebp-1,daf-16,egl-5,eor-1,fos-1,hlh-1,hlh-30,hmg-11,lsy-2,mdl-1,nhr-71,pag-3,rnt-1,snu-23
chrI	3325003	3325154	True	False	.	.	cold	1	snu-23
chrI	3328805	3328956	False	True	.	.	none	0	.
chrI	3330903	3331054	True	False	I1	stable	HOT	19	F23B12.7,blmp-1,cebp-1,crh-2,daf-16,dve-1,elt-2,fos-1,hlh-30,hmg-11,jun-1,lsy-2,madf-10,mdl-1,nhr-23,nhr-80,pha-4,pqm-1,sma-3
chrI	3332769	3332920	True	False	.	.	cold	16	cebp-1,ceh-31,ces-1,daf-16,dve-1,eor-1,hmg-11,lsy-12,lsy-2,nfya-1,nhr-23,pha-4,ref-2,sma-3,snu-23,tbx-2
chrI	3334043	3334194	True	False	G1	stable	cold	4	him-1,snpc-3.4,unc-130,xnd-1
chrI	3334559	3334710	True	False	.	.	HOT	25	C34F6.9,F13H6.1,F37D6.2,cebp-1,ceh-31,ces-1,dve-1,efl-1,eor-1,fkh-8,hmg-11,lin-35,madf-2,mls-2,nhr-47,nhr-71,nhr-80,rbr-2,snu-23,swsn-7,tbx-2,unc-42,unc-55,unc-86,xbp-1
chrI	3335972	3336123	True	False	.	.	cold	1	dsc-1
chrI	3336240	3336391	True	False	Mix4	stable	cold	2	ceh-34,pha-4
chrI	3337471	3337622	True	False	I2	stable	cold	1	zip-8
chrI	3338374	3338525	True	False	.	.	HOT	21	C34F6.9,ceh-31,ces-1,eor-1,hlh-1,hlh-30,hlh-8,lsy-2,mdl-1,mls-2,nfya-1,nhr-21,nhr-23,nhr-25,ref-2,sem-4,sptf-1,tbx-2,unc-42,unc-55,ztf-11
chrI	3349599	3349750	True	True	.	.	none	0	.
chrI	3349969	3350120	False	False	stable	stable	HOT	85	C04F5.9,C16A3.4,C34F6.9,F13H6.1,F23B12.7,F37D6.2,F49E8.2,R02D3.7,ahr-1,aly-2,blmp-1,ceh-14,ceh-18,ceh-2,ceh-28,ceh-30,ceh-31,ceh-34,ceh-82,ceh-90,ces-1,cog-1,crh-2,dpl-1,dsc-1,efl-1,egl-13,egl-5,elt-2,elt-3,eor-1,ets-4,fax-1,fkh-10,fkh-8,fos-1,hif-1,hlh-1,hlh-15,hlh-30,hlh-8,hmg-11,irx-1,jun-1,lim-6,lin-35,lsy-2,madf-10,mdl-1,nfya-1,nhr-20,nhr-21,nhr-23,nhr-25,nhr-47,nhr-71,nhr-80,nhr-85,nhr-90,n…
chrI	3351479	3351630	False	False	stable	stable	none	0	.
chrI	3353497	3353648	False	False	.	.	cold	1	fkh-8
chrI	3366912	3367063	True	False	.	.	cold	1	rpc-1
chrI	3367201	3367352	True	False	.	.	cold	3	B0261.1,rpc-1,xnd-1
chrI	3368049	3368200	True	False	.	.	none	0	.
chrI	3368647	3368798	True	False	G1	stable	cold	9	F49E8.2,athp-1,efl-1,him-1,snpc-1.1,snpc-3.4,snpc-4,unc-130,xnd-1
chrI	3371518	3371669	True	False	.	.	cold	2	F49E8.2,unc-130
chrI	3380344	3380495	False	False	.	.	none	0	.
chrI	3381723	3381874	True	False	.	.	cold	4	eor-1,hlh-1,rnt-1,unc-130
chrI	3382723	3382874	True	False	.	.	cold	2	hlh-30,rnt-1
chrI	3385281	3385432	True	False	.	.	cold	2	ceh-34,hlh-1
chrI	3386499	3386650	True	False	N+M	stable	cold	7	ceh-18,ceh-34,eor-1,hlh-1,rnt-1,snu-23,unc-55
chrI	3392043	3392194	True	False	.	.	none	0	.
chrI	3393558	3393709	True	False	.	.	none	0	.
chrI	3398643	3398794	True	False	.	.	none	0	.
chrI	3404183	3404334	False	False	.	.	cold	1	hlh-1
chrI	3405713	3405864	True	False	Mix1	stable	cold	17	F13H6.1,ceh-18,ceh-34,daf-16,hlh-1,hlh-30,lsy-2,nfya-1,nhr-20,nhr-71,pag-3,rnt-1,sma-9,snu-23,tbx-2,unc-130,unc-55
chrI	3407162	3407313	True	False	H	stable	none	0	.
chrI	3408047	3408198	False	False	.	.	cold	1	dsc-1
chrI	3409463	3409614	True	False	G3	stable	cold	4	ceh-36,dpl-1,efl-1,lin-35
chrI	3409818	3409969	False	False	stable	stable	cold	8	crh-2,dpl-1,efl-1,nfya-1,nhr-23,nhr-25,pha-4,snu-23
chrI	3412391	3412542	True	False	.	.	cold	10	dpl-1,efl-1,hlh-30,hmg-11,let-607,lin-35,mdl-1,nhr-71,nhr-80,snu-23
chrI	3416403	3416554	True	False	.	.	cold	3	F13H6.1,pha-2,pha-4
chrI	3418046	3418197	False	False	.	.	cold	6	C34F6.9,cebp-1,egl-5,nhr-71,rnt-1,unc-130
chrI	3419487	3419638	False	False	stable	stable	cold	1	ceh-18
chrI	3423634	3423785	True	False	.	.	cold	3	F13H6.1,elt-2,pha-4
chrI	3425959	3426110	True	False	N+M	stable	cold	3	ces-1,fkh-10,unc-42
chrI	3427879	3428030	False	False	.	.	none	0	.
chrI	3428792	3428943	True	False	.	.	none	0	.
chrI	3429213	3429364	True	False	.	.	none	0	.
chrI	3438654	3438805	True	False	G1	stable	cold	1	F49E8.2
chrI	3438906	3439057	True	False	G3	stable	HOT	39	C04F5.9,C16A3.4,C34F6.9,F13H6.1,F49E8.2,cebp-1,ceh-82,ces-1,dpl-1,dsc-1,efl-1,eor-1,fkh-10,fkh-8,hmg-11,irx-1,jun-1,lin-35,lsy-2,mdl-1,nfya-1,nhr-20,nhr-21,nhr-23,pag-3,pax-1,rbr-2,rnt-1,sma-3,snpc-3.4,snu-23,sptf-1,swsn-7,tbx-2,unc-130,unc-55,unc-86,xbp-1,xnd-1
chrI	3445284	3445435	True	False	.	.	none	0	.
chrI	3464179	3464330	True	True	.	.	cold	1	hlh-30
chrI	3466436	3466587	True	False	G1	stable	cold	1	unc-130
chrI	3466799	3466950	False	False	stable	stable	HOT	33	C16A3.4,C34F6.9,cebp-1,ceh-31,ceh-82,ces-1,crh-2,dpl-1,dsc-1,efl-1,eor-1,hlh-30,hmg-11,irx-1,jun-1,lin-35,lsy-2,nfya-1,nhr-20,nhr-25,nhr-47,nhr-90,pax-1,pha-4,skn-1,snu-23,sptf-1,swsn-7,unc-130,unc-42,unc-55,unc-86,xbp-1
chrI	3471403	3471554	False	False	.	.	none	0	.
chrI	3472833	3472984	True	False	.	.	cold	2	dsc-1,hlh-8
chrI	3473940	3474091	False	True	.	.	cold	1	cebp-1
chrI	3476227	3476378	True	False	H	stable	none	0	.
chrI	3480279	3480430	False	False	.	.	cold	1	nfya-1
chrI	3481498	3481649	True	False	G3	stable	HOT	35	C16A3.4,C34F6.9,R02D3.7,cebp-1,ceh-14,ces-1,crh-2,daf-16,dpl-1,dsc-1,efl-1,egl-5,elt-3,eor-1,fkh-8,hif-1,him-1,hlh-30,lin-35,lsy-2,nhr-20,nhr-47,nhr-90,pha-4,rbr-2,snpc-3.4,snpc-4,snu-23,unc-130,unc-42,unc-55,vab-15,xbp-1,xnd-1,zip-8
chrI	3484210	3484361	True	False	.	.	none	0	.
chrI	3494371	3494522	True	False	.	.	none	0	.
chrI	3499702	3499853	True	False	Mix4	stable	none	0	.
chrI	3500164	3500315	True	False	.	.	none	0	.
chrI	3500773	3500924	False	False	.	.	cold	1	snpc-4
chrI	3501231	3501382	False	False	stable	stable	HOT	37	C34F6.9,F13H6.1,blmp-1,ceh-18,ceh-28,ceh-48,ceh-82,ces-1,crh-2,daf-16,dpl-1,dsc-1,efl-1,elt-2,eor-1,fkh-8,fos-1,hlh-1,hmg-11,irx-1,lin-35,mdl-1,nfya-1,nhr-20,nhr-23,nhr-47,nhr-80,pha-4,pqm-1,ref-2,rnt-1,snpc-3.4,snu-23,swsn-7,unc-42,unc-55,xbp-1
chrI	3502730	3502881	True	False	Mix8	stable	cold	3	C34F6.9,hmg-11,nhr-80
chrI	3508689	3508840	True	False	.	.	none	0	.
chrI	3510620	3510771	True	False	.	.	none	0	.
chrI	3512930	3513081	True	False	.	.	cold	2	elt-1,unc-55
chrI	3514398	3514549	True	False	Mix2	stable	HOT	48	C34F6.9,F13H6.1,F37D6.2,cebp-1,ceh-14,ceh-18,ceh-31,ceh-34,ces-1,crh-2,daf-16,dsc-1,efl-1,elt-2,eor-1,fkh-10,fos-1,hif-1,hlh-30,hlh-8,hmg-11,jun-1,lin-35,lsy-2,madf-10,mdl-1,nfya-1,nhr-20,nhr-47,nhr-71,nhr-80,nhr-90,pha-4,pqm-1,rbr-2,ref-2,rnt-1,sdc-2,sma-3,snpc-4,snu-23,swsn-7,unc-42,unc-55,unc-86,xbp-1,ztf-11,ztf-4
chrI	3515544	3515695	True	False	.	.	cold	2	fos-1,nhr-80
chrI	3516378	3516529	True	False	G4	stable	HOT	78	C04F5.9,C16A3.4,C34F6.9,F13H6.1,F23B12.7,F37D6.2,R02D3.7,aly-2,blmp-1,cebp-1,ceh-18,ceh-28,ceh-31,ceh-82,ceh-90,ces-1,crh-2,daf-16,dpl-1,dsc-1,duxl-1,dve-1,efl-1,egl-13,egl-5,elt-2,elt-3,eor-1,fkh-10,fkh-8,fos-1,hif-1,hlh-1,hlh-30,hmg-11,irx-1,jun-1,lin-35,lsy-12,lsy-2,madf-10,mdl-1,mls-2,nfya-1,nhr-102,nhr-20,nhr-21,nhr-23,nhr-25,nhr-47,nhr-71,nhr-80,nhr-85,nhr-90,pag-3,pha-4,rbr-2,ref-2,rnt-1,s…
chrI	3529462	3529613	False	True	.	.	none	0	.
chrI	3529958	3530109	True	True	Mix3	I+H [2]	none	0	.
chrI	3531005	3531156	True	True	Mix3	I+H [2]	cold	3	eor-1,nhr-25,pag-3
chrI	3533804	3533955	True	False	I1	stable	cold	10	daf-16,dve-1,elt-2,eor-1,fos-1,hlh-30,mdl-1,nhr-80,pqm-1,sma-9
chrI	3534565	3534716	True	False	I1	stable	cold	5	crh-2,elt-2,fos-1,nhr-80,pqm-1
chrI	3546983	3547134	True	False	I2	stable	HOT	73	C16A3.4,C34F6.9,F13H6.1,F23B12.7,F49E8.2,M03D4.4,R02D3.7,ahr-1,cebp-1,ceh-14,ceh-28,ceh-30,ceh-31,ceh-34,ceh-48,ceh-82,ceh-90,ces-1,crh-2,daf-16,dpl-1,dsc-1,dve-1,efl-1,egl-5,elt-3,eor-1,fkh-8,gmeb-2,hif-1,hlh-1,hlh-30,hmg-11,irx-1,jun-1,lin-35,lsy-2,mdl-1,mls-2,nfya-1,nhr-20,nhr-21,nhr-23,nhr-25,nhr-47,nhr-71,nhr-76,nhr-80,nhr-85,nhr-90,pha-4,rbr-2,rnt-1,rpc-1,sem-4,skn-1,sma-3,snpc-3.4,snpc-4,s…
chrI	3553396	3553547	True	True	.	.	none	0	.
chrI	3560089	3560240	True	True	.	.	cold	2	nhr-25,snu-23
chrI	3562618	3562769	True	False	.	.	none	0	.
chrI	3562922	3563073	True	False	I1	stable	cold	7	daf-16,dve-1,efl-1,elt-2,hlh-30,nhr-80,snu-23
chrI	3563952	3564103	True	True	G1	Mix1	none	0	.
chrI	3600818	3600969	False	False	stable	stable	HOT	28	C16A3.4,C34F6.9,R02D3.7,ces-1,crh-2,daf-16,dpl-1,dsc-1,dve-1,efl-1,fkh-8,hlh-30,lin-35,lsy-2,mdl-1,nfya-1,nhr-20,nhr-23,nhr-47,nhr-85,pha-4,skn-1,sma-3,snu-23,unc-42,unc-55,unc-86,xbp-1
chrI	3603248	3603399	True	False	.	.	cold	1	nhr-232
chrI	3603868	3604019	True	False	G1	stable	cold	2	efl-1,xnd-1
chrI	3605737	3605888	True	False	G4	stable	cold	11	C16A3.4,C34F6.9,ces-1,dpl-1,efl-1,eor-1,lin-35,lsy-2,pha-4,unc-130,unc-55
chrI	3608272	3608423	True	False	G1	stable	cold	5	efl-1,snpc-1.1,snpc-3.4,unc-130,xnd-1
chrI	3620423	3620574	True	False	Mix4	stable	cold	2	fkh-8,unc-86
chrI	3622089	3622240	True	False	.	.	none	0	.
chrI	3623935	3624086	True	False	.	.	cold	4	ceh-36,fkh-8,mls-2,sptf-1
chrI	3627130	3627281	True	False	N+M	stable	cold	7	ceh-48,eor-1,fkh-8,hlh-30,rbr-2,unc-42,unc-55
chrI	3632045	3632196	True	True	.	.	none	0	.
chrI	3636618	3636769	True	False	Mix2	stable	HOT	61	C04F5.9,C16A3.4,C34F6.9,F13H6.1,ceh-18,ceh-2,ceh-28,ceh-31,ceh-48,ceh-90,dpl-1,dsc-1,efl-1,egl-13,egl-5,elt-2,eor-1,ets-4,fax-1,fkh-8,hif-1,him-1,hlh-30,hlh-8,hmg-11,irx-1,lim-6,lin-35,lir-3,lsy-2,madf-10,madf-2,nhr-20,nhr-23,nhr-25,nhr-47,nhr-71,nhr-80,nhr-85,nhr-90,pha-4,pqm-1,rbr-2,ref-2,rnt-1,sma-3,sma-9,snpc-4,snu-23,sptf-1,swsn-7,tbx-2,tbx-7,unc-130,unc-55,unc-86,xbp-1,xnd-1,zip-5,ztf-11,zt…
chrI	3637337	3637488	True	False	Mix3	stable	none	0	.
chrI	3638878	3639029	True	False	.	.	HOT	61	B0035.1,B0261.1,F22D6.2,F23B12.7,F52B5.7,M03D4.4,T07F8.4,atf-7,athp-1,cebp-1,ceh-36,ceh-9,che-1,crh-2,daf-16,dao-5,die-1,dpl-1,duxl-1,dve-1,efl-1,elt-2,eor-1,fos-1,hif-1,him-1,hlh-30,let-607,lir-3,lsy-12,lsy-2,madf-10,mls-2,nhr-102,nhr-20,nhr-21,nhr-23,nhr-232,nhr-47,nhr-48,nhr-71,nhr-80,nhr-90,pha-4,pqm-1,rbr-2,rec-8,rnt-1,rpc-1,sma-3,sma-9,snpc-1.1,snpc-3.4,snpc-4,snu-23,spr-1,sptf-1,tbx-2,unc-…
chrI	3644849	3645000	False	False	.	.	cold	1	dsc-1
chrI	3646074	3646225	True	False	.	.	cold	2	ceh-34,ceh-9
chrI	3646887	3647038	True	False	.	.	none	0	.
chrI	3648172	3648323	True	False	N+M	stable	HOT	61	C34F6.9,F13H6.1,F37D6.2,M03D4.4,aly-2,cebp-1,ceh-14,ceh-18,ceh-28,ceh-31,ceh-34,ceh-48,ceh-82,ces-1,crh-2,daf-16,dpl-1,dsc-1,dve-1,efl-1,egl-13,egl-5,elt-1,eor-1,ets-4,fkh-10,fkh-8,fos-1,hif-1,him-1,hlh-1,hlh-30,hlh-8,hmg-11,irx-1,lim-6,lin-35,lir-3,lsy-2,madf-2,mdl-1,nfya-1,nhr-20,nhr-47,nhr-71,pag-3,pha-4,pros-1,rbr-2,rnt-1,sma-9,snpc-4,snu-23,swsn-7,syd-9,tbx-2,unc-42,unc-55,unc-86,xbp-1,ztf-4
chrI	3649418	3649569	True	False	N+M	stable	cold	6	ces-1,fkh-10,nhr-47,unc-42,unc-55,unc-86
chrI	3650790	3650941	True	False	.	.	cold	10	F37D6.2,ceh-31,ces-1,fkh-10,him-1,hmg-11,rbr-2,unc-42,unc-55,unc-86
chrI	3652776	3652927	True	True	Mix6	Mix1	none	0	.
chrI	3663150	3663301	False	False	.	.	none	0	.
chrI	3663568	3663719	True	False	I2	stable	cold	4	daf-16,elt-2,nhr-80,pqm-1
chrI	3664046	3664197	True	False	G3	stable	none	0	.
chrI	3668889	3669040	False	True	.	.	none	0	.
chrI	3669946	3670097	False	False	.	.	none	0	.
chrI	3671318	3671469	True	False	.	.	cold	7	daf-16,dve-1,elt-2,fos-1,nhr-71,pha-4,pqm-1
chrI	3671831	3671982	True	False	H	stable	cold	14	C34F6.9,ceh-18,daf-16,elt-1,hlh-30,lin-35,lsy-2,mdl-1,nhr-71,rnt-1,sma-9,snu-23,tbx-2,unc-130
chrI	3672770	3672921	True	False	I1	stable	HOT	22	F13H6.1,atf-7,cebp-1,crh-2,daf-16,dve-1,elt-2,eor-1,fos-1,hlh-30,jun-1,lsy-2,mdl-1,nhr-48,nhr-71,nhr-80,pha-4,pqm-1,rnt-1,sma-3,sma-9,unc-62
chrI	3675840	3675991	True	False	Mix3	stable	cold	10	C34F6.9,F13H6.1,ceh-18,daf-16,dsc-1,hlh-1,lsy-2,nhr-71,rnt-1,ztf-4
chrI	3678023	3678174	False	False	.	.	none	0	.
chrI	3678908	3679059	False	False	.	.	cold	1	pha-4
chrI	3680104	3680255	True	True	.	.	HOT	20	atf-7,ceh-28,crh-2,daf-16,dve-1,elt-2,elt-3,fos-1,hlh-30,lsy-2,madf-10,nhr-21,nhr-71,nhr-80,nhr-90,pha-4,pqm-1,sma-3,sma-9,snu-23
chrI	3680889	3681040	True	False	Mix3	stable	cold	8	daf-16,elt-2,eor-1,fos-1,nhr-71,nhr-80,pqm-1,skn-1
chrI	3682041	3682192	True	False	I1	stable	HOT	40	C16A3.4,F13H6.1,F22D6.2,aha-1,atf-7,cebp-1,ceh-28,crh-2,daf-16,dpl-1,dve-1,elt-2,elt-3,eor-1,fos-1,hif-1,hlh-30,jun-1,let-607,lir-3,lsy-12,lsy-2,madf-10,mdl-1,nhr-102,nhr-20,nhr-21,nhr-23,nhr-48,nhr-71,nhr-80,nhr-90,pha-4,pqm-1,skn-1,sma-3,sma-9,snu-23,swsn-7,ztf-26
chrI	3682953	3683104	False	False	.	.	none	0	.
chrI	3684062	3684213	True	False	G1	stable	cold	1	xnd-1
chrI	3684385	3684536	True	False	.	.	cold	12	C16A3.4,C34F6.9,cebp-1,ces-1,dpl-1,eor-1,fkh-8,hlh-30,lsy-2,mdl-1,snpc-4,unc-42
chrI	3684579	3684730	False	False	stable	stable	HOT	24	C16A3.4,C34F6.9,cebp-1,ceh-31,ces-1,daf-16,dpl-1,efl-1,elt-2,eor-1,fkh-8,hif-1,hlh-30,lin-35,lsy-2,mdl-1,nhr-25,nhr-80,pha-4,rnt-1,snpc-4,tbx-2,unc-42,unc-55
chrI	3697721	3697872	True	False	G2	stable	cold	5	efl-1,him-1,snpc-3.4,unc-130,xnd-1
chrI	3698021	3698172	True	True	.	.	cold	1	dpl-1
chrI	3700549	3700700	True	False	.	.	cold	1	rpc-1
chrI	3709260	3709411	True	False	.	.	cold	1	elt-1
chrI	3709958	3710109	False	False	stable	stable	cold	10	ces-1,dve-1,elt-2,elt-3,fos-1,nhr-20,nhr-90,sma-3,sma-9,snu-23
chrI	3710349	3710500	False	False	stable	stable	none	0	.
chrI	3710752	3710903	True	False	.	.	cold	12	crh-2,daf-16,dve-1,elt-2,fos-1,hlh-30,jun-1,mdl-1,nhr-80,pha-4,pqm-1,sma-9
chrI	3713557	3713708	True	False	.	.	none	0	.
chrI	3714098	3714249	False	False	.	.	cold	1	nfya-1
chrI	3714867	3715018	False	True	.	.	none	0	.
chrI	3720847	3720998	True	False	.	.	HOT	22	C34F6.9,atf-7,cebp-1,crh-2,daf-16,dve-1,elt-2,fkh-8,fos-1,hlh-30,lin-35,lsy-2,mdl-1,nhr-20,nhr-21,nhr-47,nhr-71,sma-9,snu-23,unc-55,ztf-4,ztf-7
chrI	3721447	3721598	True	False	Mix2	stable	HOT	81	B0261.1,C04F5.9,C34F6.9,F13H6.1,F22D6.2,R02D3.7,aly-1,aly-2,atf-7,athp-1,blmp-1,cebp-1,ceh-14,ceh-18,ceh-2,ceh-28,ceh-31,ceh-34,ceh-36,ceh-48,ceh-82,cog-1,dao-5,dpl-1,dsc-1,egl-13,egl-5,ets-4,eyg-1,fax-1,fkh-10,him-1,hlh-30,hlh-6,hlh-8,hmg-11,irx-1,jun-1,lim-6,lin-35,lsy-12,lsy-2,mdl-1,mef-2,mls-2,nfya-1,nhr-20,nhr-21,nhr-23,nhr-47,nhr-71,nhr-76,nhr-90,pha-2,pha-4,pqm-1,pros-1,ref-2,repo-1,rnt-1,…
chrI	3721706	3721857	True	False	Mix2	stable	HOT	115	B0035.1,B0261.1,C04F5.9,C16A3.4,C34F6.9,F13H6.1,F22D6.2,F37D6.2,M03D4.4,R02D3.7,aha-1,aly-2,atf-7,athp-1,blmp-1,cebp-1,ceh-14,ceh-18,ceh-2,ceh-28,ceh-31,ceh-32,ceh-34,ceh-36,ceh-48,ceh-79,ceh-82,ces-1,cog-1,crh-2,daf-16,dao-5,die-1,dpff-1,dpl-1,dsc-1,dve-1,efl-1,egl-13,egl-5,elt-2,elt-3,eor-1,ets-4,eyg-1,fax-1,fkh-10,fkh-8,fos-1,hif-1,him-1,hlh-1,hlh-30,hlh-6,hlh-8,hmg-11,irx-1,jun-1,let-607,lim-…
chrI	3722661	3722812	True	False	.	.	cold	2	hlh-30,snu-23
chrI	3723524	3723675	True	False	Mix3	stable	HOT	54	C16A3.4,C34F6.9,F13H6.1,F37D6.2,R02D3.7,blmp-1,cebp-1,ceh-18,ceh-28,ceh-31,crh-2,daf-16,dpl-1,dve-1,efl-1,egl-5,elt-2,elt-3,eor-1,fkh-8,fos-1,hif-1,hlh-30,hmg-11,jun-1,lin-35,lsy-2,madf-10,mdl-1,mef-2,nhr-20,nhr-21,nhr-23,nhr-25,nhr-47,nhr-48,nhr-71,nhr-80,nhr-85,nhr-90,pha-4,pqm-1,rbr-2,rnt-1,sma-3,sma-9,snpc-4,snu-23,swsn-7,tbx-2,unc-55,vab-15,xbp-1,ztf-4
chrI	3724769	3724920	False	False	stable	stable	HOT	25	C16A3.4,blmp-1,cebp-1,crh-2,elt-1,elt-3,eor-1,fos-1,hlh-30,lsy-2,mdl-1,nhr-20,nhr-21,nhr-23,nhr-25,nhr-48,nhr-71,nhr-85,nhr-90,ref-2,sem-4,sma-3,sma-9,snu-23,ztf-26
chrI	3726518	3726669	True	False	G1	stable	cold	1	xnd-1
chrI	3726687	3726838	True	False	G2	stable	cold	1	xnd-1
chrI	3727423	3727574	True	False	.	.	none	0	.
chrI	3733801	3733952	True	False	.	.	cold	2	cebp-1,unc-55
chrI	3734338	3734489	False	False	.	.	none	0	.
chrI	3737676	3737827	False	False	.	.	cold	1	dsc-1
chrI	3738257	3738408	True	False	.	.	cold	9	ceh-18,ceh-28,dve-1,eor-1,fos-1,jun-1,nhr-23,nhr-25,nhr-48
chrI	3738973	3739124	True	True	.	.	cold	4	elt-2,fos-1,nhr-80,pqm-1
chrI	3739338	3739489	False	False	stable	stable	cold	3	eor-1,nhr-25,zip-8
chrI	3739993	3740144	True	False	.	.	none	0	.
chrI	3740473	3740624	True	False	Mix1	stable	HOT	86	C16A3.4,C34F6.9,F13H6.1,F37D6.2,R02D3.7,aly-1,aly-2,atf-7,blmp-1,cebp-1,ceh-14,ceh-18,ceh-2,ceh-31,ceh-34,ceh-82,ces-1,crh-2,daf-16,dao-5,die-1,dpl-1,dsc-1,dve-1,efl-1,egl-13,elt-1,elt-2,elt-3,eor-1,ets-7,fax-1,fkh-10,fkh-8,fos-1,hif-1,him-1,hlh-1,hlh-30,hlh-6,hlh-8,hmg-11,irx-1,jun-1,let-607,lin-35,lir-3,lsy-2,madf-10,mdl-1,mef-2,nfya-1,nhr-20,nhr-21,nhr-23,nhr-25,nhr-47,nhr-48,nhr-71,nhr-80,nhr…
chrI	3741224	3741375	True	False	G3	stable	HOT	38	C16A3.4,C34F6.9,F23B12.7,blmp-1,ceh-82,crh-2,dpl-1,dsc-1,dve-1,efl-1,elt-2,elt-3,eor-1,fkh-8,fos-1,hif-1,hlh-30,lin-35,lsy-2,mdl-1,nfya-1,nhr-20,nhr-23,nhr-47,nhr-71,nhr-90,pha-4,rnt-1,sma-3,sma-9,snpc-4,snu-23,swsn-7,unc-130,unc-55,unc-86,xbp-1,xnd-1
chrI	3744292	3744443	True	False	Mix1	stable	none	0	.
chrI	3744855	3745006	False	True	.	.	none	0	.
chrI	3749268	3749419	True	False	.	.	cold	1	nhr-25
chrI	3750304	3750455	True	False	.	.	cold	4	nhr-25,pha-4,rnt-1,snu-23
chrI	3751446	3751597	True	False	.	.	none	0	.
chrI	3752233	3752384	True	False	.	.	cold	5	nhr-23,nhr-25,nhr-85,snu-23,zip-8
chrI	3752858	3753009	True	False	.	.	none	0	.
chrI	3754551	3754702	True	False	.	.	HOT	37	C16A3.4,F13H6.1,blmp-1,ceh-16,crh-2,dpl-1,dve-1,efl-1,elt-1,elt-3,eor-1,fos-1,hlh-30,irx-1,jun-1,lir-3,lsy-2,mdl-1,nfya-1,nhr-20,nhr-21,nhr-23,nhr-25,nhr-47,nhr-71,nhr-85,nhr-90,pag-3,rnt-1,sem-4,sma-3,sma-9,snu-23,swsn-7,vab-15,xbp-1,ztf-4
chrI	3759130	3759281	True	False	Mix2	stable	HOT	28	F13H6.1,R02D3.7,blmp-1,ceh-31,dve-1,efl-1,elt-3,fos-1,lin-35,lsy-2,mdl-1,mls-2,nfya-1,nhr-20,nhr-23,nhr-25,nhr-47,nhr-85,nhr-90,pha-4,pros-1,rbr-2,rnt-1,sdc-2,sma-3,snu-23,tbx-2,xbp-1
chrI	3762698	3762849	True	False	.	.	none	0	.
chrI	3781575	3781726	True	False	Mix2	stable	HOT	23	C34F6.9,ceh-18,ceh-28,ceh-31,ceh-48,ces-1,crh-2,dve-1,eor-1,fkh-10,fkh-8,him-1,hlh-30,hmg-11,lsy-2,mdl-1,skn-1,sma-9,snpc-4,unc-42,unc-55,unc-86,ztf-11
chrI	3781778	3781929	False	False	stable	stable	HOT	52	C16A3.4,C34F6.9,F13H6.1,F37D6.2,R02D3.7,ceh-18,ceh-28,ceh-31,ceh-90,ces-1,crh-2,dpl-1,dsc-1,dve-1,efl-1,egl-5,elt-3,eor-1,fkh-10,fkh-8,him-1,hlh-30,hmg-11,irx-1,jun-1,lin-35,lsy-2,mdl-1,nfya-1,nhr-20,nhr-21,nhr-23,nhr-25,nhr-47,nhr-71,nhr-85,nhr-90,pha-4,rbr-2,rnt-1,skn-1,sma-3,sma-9,snpc-4,snu-23,swsn-7,unc-130,unc-42,unc-55,unc-86,xbp-1,ztf-11
chrI	3784393	3784544	True	False	.	.	cold	5	daf-16,lsy-2,pha-4,unc-130,xnd-1
chrI	3784566	3784717	True	False	.	.	cold	6	daf-16,lsy-2,pha-4,snpc-3.4,unc-130,xnd-1
chrI	3785307	3785458	True	False	Mix1	stable	HOT	37	C16A3.4,C34F6.9,F13H6.1,R02D3.7,ceh-14,ceh-18,ceh-31,ceh-34,ces-1,crh-2,daf-16,dpl-1,efl-1,eor-1,fkh-10,fos-1,hmg-11,jun-1,lin-35,lir-3,lsy-2,mdl-1,mls-2,nfya-1,nhr-20,nhr-25,nhr-71,nhr-80,nhr-90,pha-2,pros-1,rbr-2,snu-23,swsn-7,unc-42,unc-55,xbp-1
chrI	3786028	3786179	True	False	.	.	cold	9	cebp-1,ceh-14,ces-1,eor-1,fkh-8,lsy-2,rnt-1,sma-9,unc-55
chrI	3787704	3787855	False	False	stable	stable	HOT	74	C16A3.4,C34F6.9,F13H6.1,F23B12.7,F37D6.2,F49E8.2,R02D3.7,ZK546.5,aly-2,blmp-1,cebp-1,ceh-28,ceh-31,ceh-34,ceh-82,ces-1,cog-1,crh-2,daf-16,dpl-1,dsc-1,duxl-1,dve-1,efl-1,egl-5,elt-2,elt-3,eor-1,fkh-8,fos-1,hif-1,him-1,hlh-1,hlh-30,hmg-11,irx-1,jun-1,let-607,lin-35,lir-3,lsy-2,mdl-1,nfya-1,nhr-102,nhr-20,nhr-21,nhr-23,nhr-25,nhr-47,nhr-71,nhr-80,nhr-85,nhr-90,pax-1,pha-4,pqm-1,rbr-2,rnt-1,sem-4,skn…
chrI	3788178	3788329	True	False	.	.	none	0	.
chrI	3788682	3788833	True	False	.	.	cold	1	ztf-18
chrI	3793489	3793640	True	False	H	stable	cold	8	blmp-1,ceh-31,efl-1,hlh-30,nhr-23,nhr-25,rnt-1,xnd-1
chrI	3798625	3798776	True	False	.	.	cold	1	hif-1
chrI	3805690	3805841	True	False	.	.	cold	11	cebp-1,daf-16,dve-1,elt-2,fos-1,hif-1,hlh-30,lsy-2,nhr-80,pha-4,pqm-1
chrI	3806041	3806192	True	False	G1	stable	cold	7	F49E8.2,efl-1,lsy-2,nhr-80,snpc-3.4,unc-130,xnd-1
chrI	3806645	3806796	True	False	Mix2	stable	HOT	47	C34F6.9,F13H6.1,F37D6.2,aha-1,cebp-1,ceh-14,ceh-18,ceh-31,ceh-34,ceh-48,ceh-82,ces-1,crh-2,dsc-1,efl-1,egl-13,egl-5,eor-1,fkh-10,fkh-8,fos-1,hif-1,him-1,hlh-30,hmg-11,jun-1,lin-35,lsy-2,mdl-1,mef-2,nfya-1,nhr-20,nhr-47,nhr-71,rbr-2,ref-2,sdc-2,sma-9,snu-23,swsn-7,tbx-2,unc-42,unc-55,unc-86,xbp-1,ztf-11,ztf-4
chrI	3807521	3807672	False	False	.	.	cold	1	unc-55
chrI	3816963	3817114	True	False	G4	stable	cold	4	ceh-48,ces-1,eor-1,unc-55
chrI	3817368	3817519	True	False	G1	stable	cold	1	efl-1
chrI	3817840	3817991	False	False	stable	stable	cold	5	daf-16,efl-1,hlh-30,lin-35,nhr-80
chrI	3821343	3821494	True	True	.	.	none	0	.
chrI	3821768	3821919	True	False	Mix8	stable	cold	5	daf-16,dve-1,elt-2,hlh-30,pha-4
chrI	3822332	3822483	True	False	Mix1	stable	none	0	.
chrI	3822747	3822898	True	False	.	.	HOT	68	C16A3.4,C34F6.9,F13H6.1,F37D6.2,atf-7,cebp-1,ceh-14,ceh-18,ceh-28,ceh-31,ceh-32,ceh-82,ces-1,crh-2,dpl-1,dsc-1,dve-1,efl-1,egl-13,egl-5,elt-1,elt-3,eor-1,fkh-10,fkh-8,hif-1,him-1,hlh-30,hmg-11,irx-1,jun-1,lim-6,lin-35,lir-3,lsy-12,lsy-2,madf-10,mdl-1,mef-2,nfya-1,nhr-20,nhr-21,nhr-23,nhr-47,nhr-48,nhr-71,nhr-80,nhr-90,pros-1,rbr-2,ref-2,rnt-1,sem-4,skn-1,sma-9,snpc-4,snu-23,swsn-7,tbx-2,unc-42,un…
chrI	3823254	3823405	False	False	.	.	none	0	.
chrI	3823581	3823732	True	False	.	.	cold	14	cebp-1,dsc-1,egl-13,eor-1,fkh-8,lin-35,lsy-12,nfya-1,nhr-47,nhr-71,sem-4,sma-9,swsn-7,unc-86
chrI	3824339	3824490	True	False	Mix2	stable	HOT	106	B0035.1,C04F5.9,C16A3.4,C34F6.9,F13H6.1,F23B12.7,F37D6.2,F52B5.7,M03D4.4,R02D3.7,ZK546.5,aha-1,aly-2,atf-7,athp-1,blmp-1,ceh-14,ceh-16,ceh-18,ceh-2,ceh-28,ceh-30,ceh-31,ceh-34,ceh-36,ceh-48,ceh-82,ces-1,crh-2,daf-16,dao-5,die-1,dpl-1,dsc-1,duxl-1,dve-1,efl-1,egl-13,egl-5,elt-1,elt-2,elt-3,ets-4,ets-7,fkh-10,fkh-8,fos-1,hif-1,him-1,hlh-1,hlh-30,hmg-11,hnd-1,irx-1,jun-1,lin-35,lir-3,lsy-12,lsy-2,ma…
chrI	3824702	3824853	False	False	stable	stable	cold	10	C34F6.9,cebp-1,ceh-28,eor-1,let-607,nhr-23,nhr-71,nhr-80,unc-3,ztf-7
chrI	3825169	3825320	False	False	.	.	none	0	.
chrI	3825853	3826004	False	False	.	.	cold	1	unc-86
chrI	3826565	3826716	True	False	.	.	HOT	41	F22D6.2,F37D6.2,F52B5.7,aly-2,atf-7,athp-1,cebp-1,crh-2,daf-16,dmd-4,dsc-1,duxl-1,dve-1,egl-13,elt-2,hif-1,him-1,hlh-30,let-607,lsy-12,lsy-2,madf-10,nhr-102,nhr-47,nhr-48,nhr-71,nhr-80,nhr-90,pha-4,rbr-2,repo-1,sem-4,sma-3,sma-9,snu-23,swsn-7,tbx-2,unc-55,xbp-1,xnd-1,ztf-4
chrI	3827080	3827231	True	False	Mix8	stable	none	0	.
chrI	3828462	3828613	False	False	.	.	cold	5	dsc-1,nhr-47,nhr-71,nhr-90,repo-1
chrI	3829376	3829527	True	False	G4	stable	cold	13	F49E8.2,ces-1,daf-16,dpl-1,efl-1,irx-1,nhr-23,nhr-25,nhr-90,pha-4,rnt-1,snu-23,unc-55
chrI	3829776	3829927	True	False	Mix3	stable	HOT	45	C34F6.9,F13H6.1,F23B12.7,F37D6.2,aly-2,ceh-14,ceh-16,ceh-18,ceh-31,crh-2,daf-16,dsc-1,dve-1,egl-13,egl-5,elt-2,fkh-10,fkh-8,fos-1,hif-1,him-1,hlh-30,hmg-11,jun-1,lin-35,lsy-12,lsy-2,madf-10,mdl-1,nhr-21,nhr-47,nhr-71,nhr-80,rbr-2,rnt-1,sem-4,sma-9,snpc-4,snu-23,swsn-7,unc-42,unc-55,unc-86,vab-15,xbp-1
chrI	3830273	3830424	True	False	I1	stable	none	0	.
chrI	3830726	3830877	True	False	.	.	cold	12	ceh-28,ceh-48,daf-16,dve-1,elt-2,fkh-8,hlh-30,jun-1,madf-10,nhr-71,nhr-80,pqm-1
chrI	3831139	3831290	False	False	.	.	none	0	.
chrI	3832932	3833083	False	False	.	.	cold	1	dve-1
chrI	3837735	3837886	True	False	Mix6	stable	cold	3	hlh-1,nfya-1,rnt-1
chrI	3839954	3840105	True	False	.	.	none	0	.
chrI	3841580	3841731	True	False	Mix8	stable	cold	4	daf-16,elt-2,nhr-80,pqm-1
chrI	3842529	3842680	True	False	Mix5	stable	HOT	30	F13H6.1,M03D4.4,ceh-18,ceh-22,ceh-31,ceh-34,ceh-48,cog-1,dpl-1,elt-2,eor-1,ets-7,fos-1,hlh-1,hlh-30,hmg-11,jun-1,lim-6,lin-35,mdl-1,mls-2,nhr-20,nhr-71,nhr-80,ref-2,rnt-1,sma-9,snu-23,tbx-2,unc-55
chrI	3843701	3843852	True	False	.	.	cold	5	daf-16,dve-1,elt-2,nhr-80,pha-4
chrI	3845901	3846052	True	False	.	.	cold	2	hlh-1,zip-8
chrI	3858228	3858379	True	False	.	.	cold	6	cebp-1,daf-16,elt-2,fos-1,nhr-80,pqm-1
chrI	3860730	3860881	False	False	.	.	cold	13	ces-1,dpl-1,dsc-1,dve-1,hlh-30,hmg-11,lin-35,lsy-2,mdl-1,nhr-80,pha-4,snu-23,unc-55
chrI	3861541	3861692	True	False	.	.	cold	7	crh-2,ets-7,hmg-11,let-607,nfya-1,rbr-2,unc-55
chrI	3862006	3862157	False	False	stable	stable	cold	8	daf-16,dsc-1,elt-2,fos-1,hlh-30,nhr-80,pha-4,pqm-1
chrI	3862333	3862484	True	False	G1	stable	cold	3	snpc-3.4,unc-130,xnd-1
chrI	3862529	3862680	True	False	.	.	cold	5	dsc-1,egl-13,snpc-3.4,unc-130,xnd-1
chrI	3863054	3863205	False	False	.	.	none	0	.
chrI	3864583	3864734	False	False	.	.	none	0	.
chrI	3865619	3865770	False	False	.	.	none	0	.
chrI	3866002	3866153	True	False	G4	stable	cold	15	C16A3.4,C34F6.9,ceh-28,crh-2,dpl-1,efl-1,eor-1,hlh-30,lin-35,lsy-2,nfya-1,nhr-71,pha-4,snu-23,unc-55
chrI	3866659	3866810	True	False	G2	stable	cold	12	F49E8.2,athp-1,cebp-1,ceh-36,efl-1,lsy-2,rec-8,snpc-1.1,snpc-3.4,snpc-4,unc-130,xnd-1
chrI	3866882	3867033	True	True	G3	Mix1	cold	1	ceh-36
chrI	3867315	3867466	False	False	stable	stable	cold	16	C34F6.9,aha-1,ceh-18,ces-1,daf-16,dsc-1,egl-5,eor-1,hif-1,hlh-30,lin-35,lsy-2,nhr-80,snu-23,tbx-2,unc-55
chrI	3873359	3873510	False	True	stable	I+H [2]	cold	1	elt-2
chrI	3873896	3874047	False	False	stable	stable	HOT	90	C04F5.9,C16A3.4,C34F6.9,F13H6.1,K02D7.2,M03D4.4,R02D3.7,Y22D7AL.16,ahr-1,cebp-1,ceh-14,ceh-18,ceh-2,ceh-31,ceh-34,ceh-36,ceh-48,ceh-82,ces-1,che-1,cog-1,crh-2,daf-16,dpl-1,dsc-1,duxl-1,dve-1,efl-1,egl-5,eor-1,ets-7,eyg-1,fax-1,fos-1,gmeb-2,hif-1,hlh-1,hlh-30,hlh-6,hlh-8,hmbx-1,hmg-11,hnd-1,irx-1,let-607,lin-35,lir-3,lsy-2,madf-10,madf-2,mdl-1,mls-2,nfya-1,nhr-102,nhr-20,nhr-21,nhr-23,nhr-232,nhr-…
chrI	3876848	3876999	False	False	stable	stable	HOT	27	C04F5.9,C16A3.4,C34F6.9,F23B12.7,R02D3.7,ces-1,daf-16,dpl-1,efl-1,elt-2,eor-1,hmg-11,lin-35,lsy-2,nfya-1,nhr-20,nhr-23,nhr-71,pax-1,pha-4,sma-3,snu-23,swsn-7,unc-130,unc-42,unc-55,xbp-1
chrI	3881446	3881597	True	False	Mix8	stable	cold	1	efl-1
chrI	3887192	3887343	False	False	stable	stable	none	0	.
chrI	3889279	3889430	False	False	.	.	cold	7	C34F6.9,egl-5,hlh-1,nhr-71,pag-3,rnt-1,unc-130
chrI	3891561	3891712	True	False	N+M	stable	cold	11	C34F6.9,ceh-18,daf-16,hlh-1,lsy-2,mdl-1,nhr-71,pag-3,rnt-1,sma-9,snu-23
chrI	3897338	3897489	True	False	G3	stable	none	0	.
chrI	3898742	3898893	True	True	.	.	none	0	.
chrI	3899392	3899543	True	False	Mix6	stable	cold	2	hlh-1,hlh-8
chrI	3899822	3899973	True	False	H	stable	cold	13	blmp-1,elt-3,eor-1,fos-1,hlh-1,let-607,lsy-2,nfya-1,nhr-21,nhr-23,nhr-71,rnt-1,snu-23
chrI	3900467	3900618	True	False	.	.	none	0	.
chrI	3906305	3906456	True	False	N+M	stable	HOT	30	C34F6.9,F37D6.2,ceh-14,ceh-18,ceh-31,ceh-48,ceh-82,ces-1,crh-2,eor-1,fkh-10,fkh-8,him-1,hlh-30,hmg-11,lin-35,lsy-2,nfya-1,nhr-47,nhr-71,rbr-2,sem-4,sma-9,snu-23,swsn-7,tbx-2,unc-42,unc-55,unc-86,xbp-1
chrI	3908048	3908199	True	False	.	.	cold	3	ces-1,hlh-1,unc-42
chrI	3908527	3908678	False	False	stable	stable	HOT	23	C34F6.9,F23B12.7,F37D6.2,dpl-1,dsc-1,efl-1,eor-1,hmg-11,lin-35,lsy-2,nfya-1,nhr-23,nhr-47,nhr-71,nhr-90,pha-4,rnt-1,skn-1,snu-23,swsn-7,unc-55,unc-86,xbp-1
chrI	3910626	3910777	False	False	stable	stable	cold	9	ces-1,dpl-1,efl-1,eor-1,lin-35,lsy-2,nhr-20,snu-23,unc-55
chrI	3911867	3912018	False	False	.	.	none	0	.
chrI	3913554	3913705	True	False	.	.	none	0	.
chrI	3915772	3915923	True	False	.	.	cold	1	pax-1
chrI	3916434	3916585	True	False	.	.	none	0	.
chrI	3916778	3916929	True	False	H	stable	cold	3	blmp-1,nhr-21,nhr-23
chrI	3928261	3928412	False	False	.	.	cold	1	cebp-1
chrI	3930190	3930341	True	False	.	.	none	0	.
chrI	3930523	3930674	False	False	stable	stable	cold	17	C16A3.4,C34F6.9,cebp-1,ceh-31,dpl-1,efl-1,fos-1,hmg-11,lin-35,lsy-2,nhr-25,nhr-80,pqm-1,snpc-4,snu-23,unc-55,xbp-1
chrI	3931684	3931835	True	False	G2	stable	cold	8	F49E8.2,athp-1,efl-1,him-1,snpc-4,unc-130,xnd-1,ztf-18
chrI	3931842	3931993	True	False	G2	stable	cold	9	F49E8.2,athp-1,efl-1,him-1,snpc-3.4,snpc-4,unc-130,xnd-1,ztf-18
chrI	3934894	3935045	True	False	.	.	cold	2	athp-1,unc-130
chrI	3935102	3935253	True	False	.	.	none	0	.
chrI	3954088	3954239	False	False	stable	stable	none	0	.
chrI	3954806	3954957	True	False	Mix3	stable	none	0	.
chrI	3955487	3955638	False	False	.	.	cold	2	C34F6.9,egl-5
chrI	3956608	3956759	False	False	.	.	cold	9	C34F6.9,eor-1,hlh-1,hlh-30,hmg-11,lin-35,lsy-2,snu-23,unc-55
chrI	3956801	3956952	False	False	.	.	cold	9	C34F6.9,eor-1,hlh-1,hlh-30,hmg-11,lin-35,lsy-2,snu-23,unc-55
chrI	3957780	3957931	True	False	.	.	cold	1	ces-1
chrI	3958530	3958681	True	False	Mix2	stable	cold	4	C34F6.9,daf-16,pag-3,rnt-1
chrI	3959593	3959744	True	False	.	.	cold	5	ceh-31,daf-16,egl-5,hlh-1,ztf-11
chrI	3960280	3960431	True	False	.	.	none	0	.
chrI	3976203	3976354	True	False	.	.	cold	7	ceh-18,daf-16,dsc-1,hlh-1,nhr-71,rnt-1,snu-23
chrI	3978657	3978808	False	True	.	.	none	0	.
chrI	3982917	3983068	True	False	G3	stable	HOT	33	C16A3.4,C34F6.9,cebp-1,ceh-18,dpl-1,dsc-1,dve-1,efl-1,eor-1,ets-4,hif-1,hlh-30,jun-1,lin-35,lsy-2,nfya-1,nhr-23,nhr-25,nhr-47,nhr-48,nhr-71,pha-4,ref-2,rnt-1,sem-4,snpc-3.4,snpc-4,snu-23,swsn-7,unc-42,unc-55,xbp-1,xnd-1
chrI	3986576	3986727	False	False	.	.	cold	12	F49E8.2,F52B5.7,cebp-1,ceh-18,daf-16,dsc-1,eor-1,hlh-1,rnt-1,snu-23,unc-130,xbp-1
chrI	3987222	3987373	False	False	.	.	HOT	86	B0035.1,C04F5.9,C16A3.4,C34F6.9,F13H6.1,F22D6.2,F23B12.7,F37D6.2,R02D3.7,aly-2,blmp-1,cebp-1,ceh-14,ceh-2,ceh-28,ceh-31,ceh-82,ceh-90,ces-1,crh-2,daf-16,dpl-1,dsc-1,duxl-1,dve-1,efl-1,egl-13,elt-1,elt-2,elt-3,eor-1,ets-4,fkh-10,fkh-8,fos-1,hif-1,him-1,hlh-30,hlh-4,irx-1,jun-1,let-607,lin-35,lir-3,lsy-12,lsy-2,madf-10,mdl-1,nfya-1,nhr-102,nhr-20,nhr-21,nhr-23,nhr-25,nhr-47,nhr-48,nhr-71,nhr-85,nhr…
chrI	3987780	3987931	True	False	Mix6	stable	cold	10	M03D4.4,daf-16,eor-1,hlh-1,nfya-1,nhr-71,rnt-1,sma-9,unc-55,xbp-1
chrI	3988317	3988468	False	False	.	.	none	0	.
chrI	3988740	3988891	True	False	.	.	HOT	20	F13H6.1,ceh-18,daf-16,dsc-1,egl-5,eor-1,hlh-1,hlh-8,lin-35,lsy-2,nfya-1,nhr-71,pag-3,rnt-1,sma-9,snu-23,swsn-7,unc-130,unc-55,xbp-1
chrI	3989488	3989639	True	False	.	.	cold	2	daf-16,nhr-80
chrI	3990974	3991125	True	False	.	.	cold	1	eor-1
chrI	3991206	3991357	True	False	G1	stable	cold	10	cebp-1,daf-16,dve-1,elt-2,eor-1,fos-1,hlh-30,nhr-80,pha-4,pqm-1
chrI	3992431	3992582	False	False	stable	stable	cold	8	cebp-1,daf-16,dve-1,elt-2,fos-1,nhr-80,pqm-1,skn-1
chrI	3992730	3992881	True	False	.	.	none	0	.
chrI	3993620	3993771	True	False	.	.	cold	6	ceh-31,dsc-1,fkh-8,mls-2,nfya-1,tbx-2
chrI	3994563	3994714	True	False	Mix7	stable	HOT	31	C34F6.9,cebp-1,ceh-18,ceh-31,che-1,daf-16,dve-1,efl-1,elt-2,elt-3,fkh-8,fos-1,hif-1,hlh-1,hlh-30,hlh-8,lsy-2,madf-2,mls-2,nfya-1,nhr-47,nhr-71,nhr-80,nhr-90,ref-2,rnt-1,snu-23,sptf-1,swsn-7,tbx-2,unc-55
chrI	3996983	3997134	True	False	.	.	cold	2	snpc-4,zip-8
chrI	4001894	4002045	True	False	.	.	cold	2	ces-1,unc-55
chrI	4004805	4004956	True	False	Mix1	stable	none	0	.
chrI	4005443	4005594	True	False	.	.	HOT	43	C34F6.9,F13H6.1,F37D6.2,cebp-1,ceh-31,ceh-34,ceh-48,ces-1,cog-1,crh-2,daf-16,dsc-1,egl-13,elt-1,eor-1,fkh-8,hif-1,him-1,hlh-6,hlh-8,hmg-11,irx-1,lin-35,lsy-2,madf-10,mdl-1,nfya-1,nhr-20,nhr-47,nhr-71,rbr-2,sem-4,sma-9,snpc-4,snu-23,swsn-7,tbx-2,unc-42,unc-55,unc-86,xbp-1,ztf-18,ztf-4
chrI	4005708	4005859	True	False	.	.	HOT	45	C34F6.9,F13H6.1,F37D6.2,cebp-1,ceh-14,ceh-18,ceh-31,ceh-34,che-1,cog-1,daf-16,egl-13,eor-1,fkh-8,hif-1,him-1,hlh-6,hlh-8,hmg-11,irx-1,lin-35,lsy-2,madf-10,mdl-1,mls-2,nfya-1,nhr-20,nhr-47,nhr-71,pop-1,pros-1,rbr-2,rnt-1,sma-9,snpc-4,snu-23,swsn-7,syd-9,tbx-2,unc-42,unc-55,unc-86,xbp-1,ztf-18,ztf-4
chrI	4006416	4006567	True	False	.	.	none	0	.
chrI	4007180	4007331	True	False	.	.	cold	2	eor-1,fkh-10
chrI	4007417	4007568	True	False	.	.	cold	1	fkh-10
chrI	4008260	4008411	True	False	.	.	cold	4	fos-1,mdl-1,nhr-25,snu-23
chrI	4008776	4008927	True	False	.	.	cold	7	F13H6.1,ceh-31,ces-1,fkh-10,nhr-71,pha-4,unc-42
chrI	4009681	4009832	True	False	.	.	cold	4	ces-1,egl-5,hmg-11,unc-55
chrI	4009968	4010119	False	False	.	.	cold	2	ces-1,hmg-11
chrI	4011407	4011558	False	False	.	.	none	0	.
chrI	4012292	4012443	True	False	.	.	cold	9	F13H6.1,dve-1,hlh-30,lir-3,mdl-1,nhr-71,pha-4,rnt-1,snu-23
chrI	4012913	4013064	True	False	.	.	cold	4	F13H6.1,daf-16,mdl-1,pha-4
chrI	4013779	4013930	False	False	.	.	none	0	.
chrI	4017510	4017661	True	False	Mix1	stable	cold	5	ces-1,nhr-71,rnt-1,snu-23,unc-42
chrI	4017891	4018042	False	False	stable	stable	none	0	.
chrI	4018509	4018660	True	False	.	.	cold	1	ces-1
chrI	4019818	4019969	True	False	.	.	cold	4	ces-1,dsc-1,fkh-8,unc-42
chrI	4020633	4020784	True	False	Mix1	stable	cold	11	F13H6.1,ceh-18,eor-1,hlh-1,lin-35,nfya-1,nhr-20,nhr-71,rnt-1,snu-23,xbp-1
chrI	4021097	4021248	True	False	.	.	cold	1	rnt-1
chrI	4029399	4029550	True	False	.	.	cold	7	ces-1,eor-1,hmg-11,nhr-80,ref-2,rnt-1,snu-23
chrI	4030056	4030207	False	False	.	.	none	0	.
chrI	4030633	4030784	True	False	.	.	HOT	19	C34F6.9,F13H6.1,ceh-18,dsc-1,egl-5,eor-1,hlh-1,hlh-30,hlh-8,lsy-2,nhr-20,nhr-71,nhr-80,rnt-1,sma-9,snu-23,swsn-7,unc-130,unc-55
chrI	4032567	4032718	True	False	Mix4	stable	HOT	36	C34F6.9,F13H6.1,ceh-18,ceh-2,ceh-31,ceh-34,cog-1,dpl-1,efl-1,ets-7,hlh-1,hlh-30,hlh-6,hmg-11,lin-35,mdl-1,mls-2,nfya-1,nhr-23,nhr-232,nhr-47,nhr-71,pop-1,rbr-2,ref-2,rnt-1,sem-4,sma-3,sma-9,snu-23,sptf-1,swsn-7,syd-9,tbx-2,unc-55,unc-86
chrI	4033514	4033665	True	False	.	.	none	0	.
chrI	4034072	4034223	True	False	.	.	none	0	.
chrI	4035466	4035617	True	False	N+M	stable	HOT	23	C34F6.9,F13H6.1,ceh-18,ceh-34,cog-1,daf-16,dsc-1,hif-1,hlh-1,lin-35,lsy-2,mdl-1,nfya-1,nhr-20,nhr-71,pag-3,pros-1,rnt-1,sma-9,snu-23,swsn-7,unc-130,unc-55
chrI	4036989	4037140	False	False	.	.	none	0	.
chrI	4037800	4037951	True	False	.	.	cold	3	daf-16,hlh-1,rnt-1
chrI	4040684	4040835	False	False	.	.	cold	2	daf-16,rnt-1
chrI	4041020	4041171	True	False	.	.	none	0	.
chrI	4046756	4046907	True	False	.	.	cold	18	F13H6.1,M03D4.4,ceh-18,ceh-2,ceh-34,dsc-1,efl-1,hlh-1,hlh-8,nfya-1,nhr-20,nhr-47,nhr-71,pag-3,rnt-1,snu-23,swsn-7,tbx-2
chrI	4050629	4050780	True	False	.	.	cold	9	ceh-18,hlh-1,lin-35,mdl-1,nhr-71,pag-3,rnt-1,snu-23,unc-130
chrI	4051444	4051595	True	False	.	.	none	0	.
chrI	4072812	4072963	False	True	.	.	cold	2	elt-3,hif-1
chrI	4073677	4073828	True	True	.	.	cold	4	elt-2,fos-1,nhr-80,pqm-1
chrI	4074971	4075122	False	False	stable	stable	none	0	.
chrI	4081304	4081455	True	False	Mix1	stable	cold	6	cebp-1,daf-16,dsc-1,eor-1,pag-3,rnt-1
chrI	4091795	4091946	False	False	.	.	none	0	.
chrI	4094038	4094189	True	False	G3	stable	none	0	.
chrI	4099629	4099780	True	False	.	.	cold	7	daf-16,dve-1,elt-2,fos-1,hlh-30,nhr-80,nhr-90
chrI	4099988	4100139	False	False	.	.	cold	1	elt-2
chrI	4108732	4108883	True	False	Mix6	stable	cold	1	elt-2
chrI	4114573	4114724	True	False	G1	stable	cold	4	efl-1,snpc-3.4,unc-130,xnd-1
chrI	4116474	4116625	True	False	Mix8	stable	none	0	.
chrI	4125947	4126098	True	False	Mix6	stable	none	0	.
chrI	4132242	4132393	False	False	stable	stable	HOT	57	C16A3.4,C34F6.9,F13H6.1,F23B12.7,M03D4.4,ceh-14,ceh-18,ceh-2,ceh-31,ceh-34,ceh-36,ceh-82,che-1,crh-2,daf-16,dpl-1,efl-1,elt-2,eor-1,ets-7,eyg-1,fax-1,hif-1,hlh-1,hlh-6,hlh-8,hmg-11,hnd-1,lin-35,lsy-2,mls-2,nfya-1,nhr-20,nhr-232,nhr-47,nhr-71,nhr-80,pha-4,pop-1,pqm-1,ref-2,rnt-1,rpc-1,sma-3,snpc-4,snu-23,sptf-1,swsn-7,tbx-2,tbx-7,ttx-3,unc-130,unc-3,unc-55,unc-86,xbp-1,ztf-18
chrI	4136897	4137048	True	False	.	.	cold	1	hlh-1
chrI	4137477	4137628	False	False	.	.	cold	5	cebp-1,lsy-2,madf-10,nhr-25,snpc-3.4
chrI	4138761	4138912	False	False	stable	stable	none	0	.
chrI	4139112	4139263	True	False	Mix6	stable	cold	6	ceh-28,ceh-48,ces-1,che-1,hmg-11,unc-55
chrI	4139388	4139539	False	False	stable	stable	HOT	75	C16A3.4,C34F6.9,F13H6.1,M03D4.4,R02D3.7,ZK546.5,cebp-1,ceh-14,ceh-18,ceh-2,ceh-28,ceh-31,ceh-48,ceh-82,ces-1,che-1,crh-2,daf-16,die-1,dpl-1,dsc-1,dve-1,efl-1,egl-5,elt-2,eor-1,fax-1,fkh-8,fos-1,hif-1,hlh-1,hlh-30,hmg-11,jun-1,lin-35,lsy-12,lsy-2,madf-10,mdl-1,mls-2,nfya-1,nhr-20,nhr-21,nhr-23,nhr-25,nhr-47,nhr-71,nhr-80,nhr-85,pag-3,pha-4,rbr-2,ref-2,rnt-1,skn-1,sma-3,sma-9,snpc-3.4,snpc-4,snu-23…
chrI	4139751	4139902	True	False	Mix8	stable	none	0	.
chrI	4140350	4140501	False	False	stable	stable	cold	7	fos-1,lsy-2,nhr-21,nhr-23,nhr-80,ref-2,skn-1
chrI	4140761	4140912	True	True	H	I+H [2]	cold	4	daf-16,eor-1,nhr-25,nhr-80
chrI	4145056	4145207	True	True	.	.	none	0	.
chrI	4145211	4145362	True	True	.	.	none	0	.
chrI	4147106	4147257	True	False	Mix8	stable	none	0	.
chrI	4149345	4149496	False	False	stable	stable	none	0	.
chrI	4149761	4149912	True	False	H	stable	cold	2	nhr-25,zip-8
chrI	4153335	4153486	True	False	.	.	cold	1	nhr-25
chrI	4154446	4154597	False	False	stable	stable	none	0	.
chrI	4155690	4155841	False	True	.	.	cold	6	daf-16,dve-1,elt-2,fos-1,nhr-80,pqm-1
chrI	4157262	4157413	False	True	.	.	none	0	.
chrI	4157602	4157753	False	True	.	.	none	0	.
chrI	4158167	4158318	False	True	.	.	cold	10	F13H6.1,crh-2,daf-16,dve-1,elt-2,fos-1,jun-1,nhr-80,pqm-1,sma-9
chrI	4158701	4158852	True	False	Mix6	stable	none	0	.
chrI	4161186	4161337	True	False	I1	stable	cold	9	crh-2,daf-16,dve-1,elt-2,fos-1,jun-1,nhr-80,pha-4,pqm-1
chrI	4161914	4162065	True	False	Mix3	stable	cold	2	daf-16,elt-2
chrI	4171402	4171553	True	False	.	.	none	0	.
chrI	4172085	4172236	False	False	stable	stable	HOT	162	B0261.1,C04F5.9,C16A3.4,C34F6.9,F13H6.1,F22D6.2,F23B12.7,F37D6.2,F49E8.2,F52B5.7,F57C9.4,K02D7.2,M03D4.4,R02D3.7,T07F8.4,T26A5.8,ZK546.5,aha-1,ahr-1,aly-1,aly-2,atf-7,athp-1,attf-4,blmp-1,cebp-1,ceh-14,ceh-16,ceh-18,ceh-2,ceh-22,ceh-24,ceh-28,ceh-30,ceh-31,ceh-32,ceh-34,ceh-36,ceh-48,ceh-62,ceh-82,ceh-90,ces-1,che-1,cog-1,crh-2,daf-16,dao-5,die-1,dmd-4,dpl-1,dsc-1,duxl-1,dve-1,efl-1,egl-13,egl-5,…
chrI	4173048	4173199	False	False	.	.	none	0	.
chrI	4173833	4173984	True	True	I1	Mix1	cold	15	crh-2,daf-16,dve-1,elt-2,elt-3,fos-1,hlh-30,nhr-48,nhr-80,pha-4,pqm-1,sma-3,sma-9,snpc-4,snu-23
chrI	4174320	4174471	True	False	Mix8	stable	cold	3	dve-1,hlh-30,pha-4
chrI	4174655	4174806	True	False	G1	stable	none	0	.
chrI	4174995	4175146	True	False	Mix8	stable	HOT	31	C16A3.4,C34F6.9,R02D3.7,cebp-1,ces-1,crh-2,daf-16,dpl-1,dve-1,efl-1,egl-5,eor-1,lin-35,lsy-2,nhr-23,nhr-47,nhr-71,nhr-80,pax-1,pha-4,skn-1,sma-3,snpc-4,snu-23,swsn-7,unc-130,unc-42,unc-55,xbp-1,ztf-18,ztf-4
chrI	4175885	4176036	False	False	.	.	HOT	42	B0261.1,C34F6.9,F37D6.2,M03D4.4,aly-1,ceh-18,ceh-2,ceh-30,ceh-31,ceh-34,ceh-36,eor-1,ets-7,fos-1,gmeb-2,hlh-30,hmg-11,hnd-1,lsy-2,madf-2,mls-2,nfya-1,nhr-23,nhr-232,nhr-25,nhr-80,npax-4,pha-2,pha-4,pop-1,rnt-1,rpc-1,snpc-4,snu-23,sptf-1,swsn-7,tbx-2,ttx-3,unc-55,unc-86,xbp-1,ztf-18
chrI	4177492	4177643	False	False	.	.	HOT	20	F49E8.2,F52B5.7,F57C9.4,T07F8.4,T26A5.8,athp-1,cebp-1,ceh-79,daf-16,die-1,elt-2,madf-10,nhr-102,nhr-90,rec-8,repo-1,snpc-4,unc-130,xnd-1,ztf-18
chrI	4177756	4177907	False	False	.	.	cold	1	F57C9.4
chrI	4178549	4178700	False	False	stable	stable	HOT	83	C04F5.9,C16A3.4,C34F6.9,F13H6.1,F23B12.7,F37D6.2,R02D3.7,aly-2,atf-7,blmp-1,cebp-1,ceh-18,ceh-28,ceh-31,ceh-82,ceh-90,ces-1,cog-1,crh-2,daf-16,dpl-1,dsc-1,duxl-1,dve-1,efl-1,egl-13,egl-5,elt-2,elt-3,eor-1,fkh-10,fkh-8,fos-1,hif-1,him-1,hlh-30,hmg-11,irx-1,jun-1,let-607,lin-35,lir-3,lsy-12,lsy-2,madf-10,mdl-1,nfya-1,nhr-102,nhr-20,nhr-21,nhr-23,nhr-25,nhr-47,nhr-48,nhr-71,nhr-80,nhr-85,nhr-90,pha-…
chrI	4181855	4182006	True	False	.	.	cold	1	nhr-90
chrI	4182201	4182352	True	False	.	.	cold	8	cebp-1,daf-16,dve-1,elt-2,lsy-2,nhr-102,nhr-90,snpc-4
chrI	4184568	4184719	False	False	.	.	none	0	.
chrI	4185332	4185483	True	False	.	.	cold	6	cebp-1,daf-16,efl-1,elt-2,nhr-80,xnd-1
chrI	4185664	4185815	True	False	.	.	none	0	.
chrI	4185947	4186098	True	False	G2	stable	none	0	.
chrI	4186367	4186518	True	False	I1	stable	cold	3	elt-2,fos-1,nhr-80
chrI	4187199	4187350	True	False	.	.	none	0	.
chrI	4187467	4187618	True	False	.	.	none	0	.
chrI	4188259	4188410	False	False	.	.	none	0	.
chrI	4198677	4198828	True	False	.	.	none	0	.
chrI	4198990	4199141	True	True	.	.	cold	2	hlh-1,zip-8
chrI	4199357	4199508	True	False	.	.	none	0	.
chrI	4199741	4199892	True	False	.	.	cold	2	daf-16,eor-1
chrI	4200057	4200208	True	False	.	.	cold	4	aly-1,eor-1,unc-55,ztf-11
chrI	4200713	4200864	True	False	.	.	cold	1	ces-1
chrI	4201060	4201211	True	True	.	.	cold	4	dve-1,hlh-30,lsy-2,skn-1
chrI	4201628	4201779	True	False	.	.	cold	11	elt-1,hlh-1,hlh-8,irx-1,nhr-20,nhr-25,nhr-85,ref-2,rnt-1,snu-23,tbx-2
chrI	4202290	4202441	True	False	.	.	cold	2	ces-1,unc-42
chrI	4202770	4202921	False	True	.	.	cold	7	daf-16,dve-1,elt-2,fos-1,nhr-80,pha-4,pqm-1
chrI	4210391	4210542	True	False	G2	stable	cold	2	F49E8.2,xnd-1
chrI	4210753	4210904	True	False	G4	stable	cold	9	dpl-1,efl-1,lin-35,lsy-2,nhr-25,nhr-80,pha-4,snu-23,unc-55
chrI	4215728	4215879	False	False	stable	stable	HOT	48	C04F5.9,C16A3.4,C34F6.9,R02D3.7,ceh-14,ceh-2,ceh-31,ceh-82,ceh-90,daf-16,dpl-1,dsc-1,dve-1,efl-1,eor-1,ets-4,fkh-8,hif-1,hlh-30,hmg-11,irx-1,lin-35,lir-3,lsy-2,mdl-1,nhr-20,nhr-23,nhr-25,nhr-47,nhr-71,nhr-90,pag-3,pha-4,ref-2,rnt-1,sdc-2,snpc-4,snu-23,swsn-7,tbx-2,tbx-7,unc-130,unc-55,unc-86,xbp-1,xnd-1,zip-5,ztf-11
chrI	4215989	4216140	False	False	stable	stable	cold	3	irx-1,ref-2,sdc-2
chrI	4216483	4216634	False	False	.	.	none	0	.
chrI	4217285	4217436	True	False	.	.	none	0	.
chrI	4218436	4218587	True	False	Mix4	stable	cold	4	C34F6.9,lsy-2,unc-55,unc-86
chrI	4218691	4218842	True	False	.	.	cold	7	C34F6.9,eor-1,lsy-2,nhr-71,tbx-2,unc-55,unc-86
chrI	4219751	4219902	True	False	.	.	cold	2	ceh-31,unc-55
chrI	4223143	4223294	True	False	.	.	cold	6	C34F6.9,ces-1,dsc-1,egl-5,sma-9,unc-55
chrI	4224891	4225042	True	False	.	.	HOT	42	C34F6.9,F13H6.1,ceh-14,ceh-18,ceh-2,ceh-31,ceh-34,ceh-48,ces-1,cog-1,crh-2,daf-16,dpl-1,dsc-1,dve-1,eor-1,fax-1,fkh-8,hif-1,hlh-1,hlh-30,hlh-8,lim-6,lin-35,lsy-2,mls-2,nfya-1,nhr-232,nhr-47,nhr-71,pop-1,rbr-2,ref-2,rnt-1,sma-9,snu-23,sptf-1,swsn-7,tbx-2,unc-42,unc-55,ztf-11
chrI	4225848	4225999	False	True	.	.	cold	2	ceh-34,dsc-1
chrI	4227614	4227765	True	False	.	.	none	0	.
chrI	4229602	4229753	True	False	.	.	none	0	.
chrI	4242492	4242643	True	False	.	.	cold	12	C34F6.9,ces-1,crh-2,dpl-1,efl-1,eor-1,lin-35,lsy-2,pha-4,snu-23,unc-55,xbp-1
chrI	4247532	4247683	False	False	stable	stable	HOT	76	C04F5.9,C16A3.4,C34F6.9,F13H6.1,F22D6.2,F23B12.7,F37D6.2,athp-1,ceh-14,ceh-2,ceh-31,ceh-82,ceh-90,cog-1,crh-2,daf-16,dpl-1,dsc-1,dve-1,efl-1,egl-13,egl-5,elt-2,elt-3,eor-1,ets-4,fax-1,fkh-8,fos-1,hif-1,him-1,hlh-30,hlh-4,hlh-6,hlh-8,hmg-11,irx-1,let-607,lim-6,lin-35,lir-3,lsy-12,lsy-2,madf-10,mdl-1,nhr-20,nhr-23,nhr-25,nhr-47,nhr-71,nhr-80,nhr-85,nhr-90,pha-4,rbr-2,rec-8,ref-2,rnt-1,sma-3,sma-9,s…
chrI	4254040	4254191	True	False	.	.	HOT	92	B0035.1,C16A3.4,C34F6.9,F13H6.1,F22D6.2,F37D6.2,F52B5.7,R02D3.7,T07F8.4,alr-1,aly-1,atf-7,athp-1,blmp-1,cebp-1,ceh-14,ceh-18,ceh-31,ceh-34,ceh-82,ces-1,crh-2,die-1,dpl-1,dsc-1,dve-1,efl-1,egl-13,egl-5,elt-1,elt-2,elt-3,eor-1,fax-1,fkh-10,fkh-8,fos-1,hif-1,him-1,hlh-1,hlh-30,hlh-6,hlh-8,hmg-11,irx-1,jun-1,let-607,lim-6,lin-35,lir-3,lsy-12,lsy-2,madf-10,mdl-1,mls-2,nfya-1,nhr-20,nhr-21,nhr-25,nhr-4…
chrI	4254747	4254898	True	False	.	.	cold	5	F23B12.7,ceh-28,lsy-2,snpc-3.4,xnd-1
chrI	4255389	4255540	True	False	.	.	none	0	.
chrI	4265950	4266101	False	False	.	.	cold	2	dpl-1,nfya-1
chrI	4270484	4270635	True	False	G4	stable	HOT	90	C04F5.9,C16A3.4,C34F6.9,F13H6.1,F23B12.7,F37D6.2,F49E8.2,M03D4.4,R02D3.7,ZK546.5,aha-1,aly-2,blmp-1,cebp-1,ceh-14,ceh-18,ceh-2,ceh-28,ceh-30,ceh-31,ceh-34,ceh-82,cog-1,crh-2,daf-16,dmd-4,dpl-1,dsc-1,duxl-1,efl-1,egl-13,elt-2,elt-3,eor-1,ets-4,fkh-10,fkh-8,fos-1,hif-1,him-1,irx-1,jun-1,let-607,lin-35,lir-3,lsy-12,lsy-2,madf-10,mdl-1,mls-2,nfya-1,nhr-10,nhr-102,nhr-20,nhr-21,nhr-23,nhr-25,nhr-47,nh…
chrI	4298073	4298224	True	False	N+M	stable	HOT	99	C16A3.4,C34F6.9,F13H6.1,F37D6.2,R02D3.7,aha-1,aly-2,atf-7,athp-1,blmp-1,cebp-1,ceh-14,ceh-18,ceh-2,ceh-28,ceh-30,ceh-31,ceh-34,ceh-48,ceh-82,ces-1,cog-1,crh-2,daf-16,die-1,dpl-1,dsc-1,duxl-1,dve-1,efl-1,egl-13,egl-5,elt-1,elt-2,elt-3,eor-1,fkh-10,fkh-8,fos-1,hif-1,him-1,hlh-1,hlh-30,hmg-11,hnd-1,irx-1,jun-1,lin-35,lir-3,lsy-12,lsy-2,madf-10,madf-2,mdl-1,mef-2,mls-2,nfya-1,nhr-10,nhr-102,nhr-20,nh…
chrI	4299155	4299306	True	False	.	.	cold	9	ceh-90,daf-16,dve-1,elt-2,fos-1,hlh-30,nhr-80,pha-4,sma-9
chrI	4299581	4299732	True	False	.	.	HOT	38	F13H6.1,R02D3.7,atf-7,blmp-1,cebp-1,ceh-28,ceh-31,cog-1,crh-2,efl-1,elt-2,elt-3,eor-1,irx-1,lin-35,lsy-2,mdl-1,mls-2,nfya-1,nhr-20,nhr-23,nhr-25,nhr-47,nhr-71,nhr-85,pha-4,rnt-1,sma-3,sma-9,snu-23,sptf-1,swsn-7,tbx-2,tbx-7,unc-55,xbp-1,zip-8,ztf-11
chrI	4302326	4302477	True	False	Mix8	stable	HOT	21	C34F6.9,ces-1,crh-2,dpl-1,dve-1,efl-1,elt-2,eor-1,hlh-30,lin-35,lsy-2,nfya-1,nhr-23,nhr-47,nhr-71,pha-4,snu-23,swsn-7,unc-55,xbp-1,xnd-1
chrI	4302843	4302994	True	False	.	.	none	0	.
chrI	4303267	4303418	True	False	.	.	none	0	.
chrI	4303927	4304078	True	False	.	.	cold	2	nhr-23,nhr-25
chrI	4305672	4305823	False	False	.	.	none	0	.
chrI	4306594	4306745	False	False	.	.	none	0	.
chrI	4308292	4308443	True	False	.	.	cold	7	ceh-31,ces-1,dsc-1,hlh-1,hlh-8,pax-1,unc-55
chrI	4309790	4309941	True	False	.	.	cold	1	elt-1
chrI	4311691	4311842	True	False	.	.	HOT	24	C34F6.9,F13H6.1,aly-2,ceh-18,ceh-34,ces-1,crh-2,daf-16,dpl-1,dve-1,efl-1,elt-2,fkh-8,fos-1,hmg-11,lin-35,lsy-2,nhr-71,nhr-80,pha-4,rbr-2,rnt-1,snu-23,unc-55
chrI	4312773	4312924	True	False	.	.	cold	8	ceh-31,ces-1,hmg-11,lim-6,mls-2,tbx-2,unc-42,unc-55
chrI	4313682	4313833	True	False	.	.	cold	2	lsy-2,nhr-80
chrI	4314433	4314584	True	False	.	.	cold	5	daf-16,elt-2,fos-1,nhr-80,pqm-1
chrI	4315099	4315250	True	False	.	.	none	0	.
chrI	4315485	4315636	True	False	.	.	cold	1	nhr-85
chrI	4316403	4316554	False	False	.	.	cold	2	ceh-18,rnt-1
chrI	4317183	4317334	False	False	.	.	cold	5	daf-16,elt-2,fos-1,nhr-80,pqm-1
chrI	4318841	4318992	False	False	.	.	cold	1	pha-4
chrI	4320786	4320937	True	False	Mix6	stable	HOT	39	C34F6.9,ceh-18,ceh-2,ceh-31,ceh-34,ces-1,cog-1,crh-2,daf-16,elt-2,eor-1,fos-1,hmg-11,hnd-1,lim-6,lin-35,lsy-2,madf-2,mls-2,nfya-1,nhr-20,nhr-232,nhr-47,nhr-71,nhr-80,pha-2,pha-4,pqm-1,pros-1,ref-2,rnt-1,sma-9,snu-23,sptf-1,swsn-7,tbx-2,unc-42,unc-55,unc-86
chrI	4321450	4321601	True	False	.	.	none	0	.
chrI	4322461	4322612	True	False	.	.	cold	4	elt-2,nhr-80,pha-4,pqm-1
chrI	4322753	4322904	True	False	.	.	cold	3	elt-1,nhr-23,nhr-85
chrI	4323904	4324055	False	True	.	.	cold	1	nhr-80
chrI	4324137	4324288	True	False	.	.	cold	6	nhr-23,nhr-25,nhr-71,nhr-85,sma-3,snu-23
chrI	4327957	4328108	True	False	.	.	cold	5	cebp-1,daf-16,egl-5,nhr-23,ztf-26
chrI	4328173	4328324	True	False	.	.	cold	18	blmp-1,cebp-1,daf-16,dve-1,elt-2,elt-3,hlh-30,lsy-2,mdl-1,nhr-20,nhr-23,nhr-25,nhr-80,nhr-85,sma-3,sma-9,snu-23,ztf-26
chrI	4328966	4329117	True	False	.	.	HOT	20	blmp-1,crh-2,daf-16,dve-1,elt-3,fos-1,hlh-30,irx-1,lsy-2,nhr-20,nhr-21,nhr-23,nhr-25,nhr-80,nhr-85,nhr-90,sma-3,sma-9,snu-23,vab-15
chrI	4329384	4329535	True	False	.	.	cold	10	F13H6.1,cebp-1,ceh-18,eor-1,hlh-1,hlh-30,nhr-71,pag-3,rnt-1,sma-9
chrI	4330599	4330750	False	False	.	.	HOT	20	C34F6.9,F13H6.1,cebp-1,ceh-18,daf-16,elt-2,elt-3,eor-1,fos-1,lsy-2,nhr-20,nhr-25,nhr-71,nhr-80,pha-4,pqm-1,rnt-1,sma-9,snu-23,unc-55
chrI	4332273	4332424	True	True	.	.	cold	4	fos-1,nhr-80,nhr-90,pqm-1
chrI	4333913	4334064	True	False	.	.	cold	17	F13H6.1,crh-2,daf-16,dve-1,elt-2,eor-1,fos-1,hlh-30,jun-1,mdl-1,nhr-20,nhr-80,nhr-85,pha-4,pqm-1,sma-9,snu-23
chrI	4334461	4334612	True	False	.	.	cold	8	eor-1,fos-1,hlh-30,nhr-21,nhr-80,pqm-1,sma-9,unc-55
chrI	4367896	4368047	False	False	stable	stable	HOT	49	C04F5.9,C16A3.4,C34F6.9,F13H6.1,F23B12.7,F37D6.2,M03D4.4,aly-2,ceh-14,ceh-18,ceh-31,ceh-34,ceh-36,ces-1,daf-16,dpl-1,dsc-1,efl-1,eor-1,fax-1,fkh-8,gmeb-2,hlh-1,hlh-30,lin-35,lsy-2,mls-2,nfya-1,nhr-20,nhr-23,nhr-47,nhr-71,nhr-80,pha-2,pha-4,rbr-2,rnt-1,snpc-4,snu-23,sptf-1,swsn-7,tbx-2,ttx-3,unc-3,unc-42,unc-55,unc-86,xbp-1,ztf-18
chrI	4370999	4371150	True	False	.	.	cold	1	aly-1
chrI	4373103	4373254	True	False	G3	stable	cold	7	C34F6.9,ces-1,daf-16,lsy-2,pha-4,snu-23,unc-55
chrI	4373381	4373532	True	False	Mix8	stable	none	0	.
chrI	4374295	4374446	False	False	stable	stable	none	0	.
chrI	4375083	4375234	True	False	.	.	none	0	.
chrI	4375213	4375364	True	False	.	.	cold	2	snpc-1.1,snpc-3.4
chrI	4375476	4375627	True	False	.	.	cold	3	snpc-1.1,snpc-3.4,snpc-4
chrI	4381786	4381937	True	False	G4	stable	HOT	23	C34F6.9,ceh-48,dpl-1,dsc-1,efl-1,egl-5,eor-1,hlh-1,lin-35,lir-3,lsy-2,mdl-1,nhr-21,nhr-47,nhr-71,pha-4,rnt-1,sma-9,snu-23,swsn-7,unc-55,vab-15,xbp-1
chrI	4382097	4382248	True	False	G1	stable	cold	10	F49E8.2,efl-1,nhr-71,nhr-90,rpc-1,sma-3,snpc-4,unc-130,xnd-1,ztf-18
chrI	4382273	4382424	True	False	Mix8	stable	HOT	19	cebp-1,ceh-31,dve-1,eor-1,nhr-102,nhr-20,nhr-71,nhr-80,nhr-90,rbr-2,rpc-1,sma-3,snpc-4,snu-23,swsn-7,tbx-2,unc-130,unc-55,ztf-18
chrI	4385763	4385914	True	False	.	.	cold	2	snpc-3.4,xnd-1
chrI	4385986	4386137	True	False	.	.	cold	4	F49E8.2,efl-1,snpc-3.4,xnd-1
chrI	4386503	4386654	False	False	stable	stable	cold	7	cebp-1,efl-1,eor-1,fos-1,nhr-80,rnt-1,snu-23
chrI	4389341	4389492	True	False	.	.	cold	2	snpc-1.1,snpc-4
chrI	4404697	4404848	True	False	.	.	cold	1	unc-86
chrI	4407217	4407368	True	False	.	.	none	0	.
chrI	4419133	4419284	False	False	.	.	none	0	.
chrI	4420891	4421042	True	False	.	.	cold	1	pha-4
chrI	4423036	4423187	True	False	.	.	none	0	.
chrI	4431974	4432125	False	False	.	.	cold	13	C34F6.9,F13H6.1,daf-16,dsc-1,egl-5,eor-1,lsy-2,nhr-71,rnt-1,sem-4,sma-9,snu-23,unc-55
chrI	4432608	4432759	False	True	.	.	none	0	.
chrI	4433141	4433292	False	False	.	.	cold	14	F13H6.1,cebp-1,ceh-18,daf-16,elt-2,irx-1,mdl-1,nhr-20,nhr-71,nhr-80,pha-4,sma-3,sma-9,swsn-7
chrI	4433375	4433526	False	False	.	.	cold	8	F13H6.1,cebp-1,daf-16,elt-2,irx-1,nhr-71,nhr-80,pha-4
chrI	4434053	4434204	False	False	.	.	cold	10	F13H6.1,ceh-18,daf-16,lsy-2,mdl-1,nhr-71,pha-4,rnt-1,sma-9,snu-23
chrI	4434735	4434886	True	True	.	.	cold	15	blmp-1,daf-16,dve-1,elt-2,fos-1,jun-1,let-607,lsy-2,mdl-1,nhr-48,nhr-80,pha-4,pqm-1,sma-3,sma-9
chrI	4435059	4435210	False	False	.	.	cold	2	elt-2,nhr-80
chrI	4436788	4436939	False	False	.	.	HOT	23	F13H6.1,cebp-1,ceh-34,crh-2,daf-16,dve-1,elt-2,eor-1,fos-1,jun-1,lsy-2,mdl-1,nhr-102,nhr-20,nhr-48,nhr-71,nhr-80,pha-4,pqm-1,sma-3,sma-9,snu-23,tbx-2
chrI	4437993	4438144	True	False	.	.	cold	10	daf-16,dve-1,elt-2,fos-1,jun-1,nhr-80,pha-4,pqm-1,sma-3,sma-9
chrI	4439060	4439211	True	True	.	.	cold	5	daf-16,elt-2,fos-1,nhr-80,pqm-1
chrI	4440276	4440427	True	False	.	.	none	0	.
chrI	4444406	4444557	False	False	stable	stable	HOT	49	C16A3.4,C34F6.9,F13H6.1,F23B12.7,cebp-1,ceh-18,ceh-28,ceh-48,ceh-82,ces-1,crh-2,daf-16,dpl-1,dve-1,efl-1,elt-3,eor-1,fkh-8,fos-1,hlh-30,hmg-11,irx-1,jun-1,lin-35,lir-3,lsy-2,mdl-1,nfya-1,nhr-20,nhr-21,nhr-23,nhr-25,nhr-47,nhr-71,nhr-80,nhr-90,pha-4,rbr-2,rnt-1,skn-1,sma-3,snpc-4,snu-23,swsn-7,unc-130,unc-42,unc-55,unc-86,xbp-1
chrI	4446776	4446927	False	True	.	.	none	0	.
chrI	4447403	4447554	False	True	.	.	none	0	.
chrI	4448154	4448305	False	True	.	.	none	0	.
chrI	4448773	4448924	False	True	.	.	none	0	.
chrI	4449116	4449267	False	True	.	.	none	0	.
chrI	4449974	4450125	False	True	.	.	none	0	.
chrI	4450304	4450455	False	True	.	.	none	0	.
chrI	4450697	4450848	True	True	.	.	none	0	.
chrI	4451058	4451209	True	True	G4	Mix1	HOT	19	C34F6.9,ces-1,dpl-1,dve-1,efl-1,egl-5,eor-1,hlh-1,hmg-11,irx-1,lin-35,lsy-2,nhr-47,pha-4,snu-23,swsn-7,unc-55,xbp-1,zip-8
chrI	4451542	4451693	False	True	.	.	none	0	.
chrI	4452487	4452638	False	False	.	.	none	0	.
chrI	4453425	4453576	False	True	.	.	none	0	.
chrI	4454636	4454787	False	True	.	.	none	0	.
chrI	4455011	4455162	False	True	.	.	none	0	.
chrI	4455274	4455425	False	True	.	.	none	0	.
chrI	4455957	4456108	False	True	.	.	none	0	.
chrI	4456221	4456372	True	True	.	.	none	0	.
chrI	4456875	4457026	True	False	G1	stable	cold	2	elt-2,nhr-80
chrI	4457289	4457440	True	True	G1	Mix1	cold	1	nhr-80
chrI	4457720	4457871	True	True	.	.	none	0	.
chrI	4458331	4458482	True	True	.	.	none	0	.
chrI	4459089	4459240	True	True	.	.	none	0	.
chrI	4459706	4459857	True	False	.	.	cold	2	elt-2,nhr-80
chrI	4460075	4460226	False	True	.	.	cold	1	nhr-80
chrI	4461517	4461668	False	True	.	.	none	0	.
chrI	4461856	4462007	False	True	.	.	none	0	.
chrI	4462132	4462283	False	True	.	.	none	0	.
chrI	4462507	4462658	False	True	.	.	none	0	.
chrI	4463163	4463314	False	True	stable	Mix1	none	0	.
chrI	4463451	4463602	False	True	.	.	none	0	.
chrI	4463760	4463911	False	True	.	.	none	0	.
chrI	4464182	4464333	False	True	.	.	none	0	.
chrI	4464667	4464818	False	True	.	.	none	0	.
chrI	4464949	4465100	False	True	.	.	none	0	.
chrI	4465260	4465411	False	True	.	.	none	0	.
chrI	4465793	4465944	False	True	.	.	none	0	.
chrI	4466503	4466654	False	True	.	.	none	0	.
chrI	4466944	4467095	False	True	.	.	cold	2	snpc-4,snu-23
chrI	4467822	4467973	False	True	.	.	cold	2	fkh-8,nhr-71
chrI	4468444	4468595	False	True	.	.	none	0	.
chrI	4469194	4469345	False	True	.	.	none	0	.
chrI	4469687	4469838	False	True	.	.	none	0	.
chrI	4470057	4470208	False	True	.	.	none	0	.
chrI	4470372	4470523	False	True	.	.	none	0	.
chrI	4470666	4470817	False	True	.	.	none	0	.
chrI	4471003	4471154	False	True	.	.	none	0	.
chrI	4471809	4471960	True	True	.	.	cold	1	pha-4
chrI	4472755	4472906	False	True	.	.	none	0	.
chrI	4473180	4473331	False	True	.	.	cold	1	egl-13
chrI	4473699	4473850	False	True	.	.	none	0	.
chrI	4474215	4474366	True	True	.	.	cold	2	nfya-1,nhr-25
chrI	4474653	4474804	False	True	.	.	none	0	.
chrI	4475157	4475308	True	False	Mix4	stable	cold	15	F13H6.1,M03D4.4,ceh-18,ceh-31,ces-1,efl-1,fkh-8,lin-35,lsy-2,nhr-47,nhr-71,rnt-1,snu-23,unc-42,unc-55
chrI	4477215	4477366	False	True	.	.	cold	2	dsc-1,fkh-8
chrI	4480898	4481049	True	True	G3	Mix4	cold	12	F23B12.7,cebp-1,dpl-1,dve-1,efl-1,elt-2,fos-1,nhr-80,pha-4,pqm-1,unc-130,unc-55
chrI	4485084	4485235	False	False	.	.	cold	11	C34F6.9,ceh-31,ces-1,lin-35,lsy-2,nhr-80,nhr-85,sma-9,snu-23,unc-55,unc-86
chrI	4485337	4485488	True	False	.	.	cold	3	nhr-80,nhr-85,snu-23
chrI	4486726	4486877	True	False	.	.	cold	18	blmp-1,cebp-1,dve-1,elt-3,eor-1,fos-1,hlh-30,lsy-2,nhr-20,nhr-21,nhr-25,nhr-80,nhr-85,pag-3,pqm-1,sma-3,sma-9,snu-23
chrI	4487194	4487345	True	False	.	.	cold	2	rbr-2,unc-55
chrI	4488240	4488391	False	False	.	.	cold	3	fkh-10,hlh-30,unc-42
chrI	4488900	4489051	True	True	.	.	none	0	.
chrI	4489539	4489690	True	False	.	.	HOT	19	C34F6.9,F13H6.1,blmp-1,cebp-1,daf-16,dve-1,elt-2,elt-3,eor-1,fos-1,hlh-30,lsy-2,mdl-1,nhr-20,nhr-71,nhr-80,nhr-85,sma-9,snu-23
chrI	4490406	4490557	True	False	.	.	HOT	74	C16A3.4,C34F6.9,F13H6.1,F37D6.2,aly-1,blmp-1,cebp-1,ceh-14,ceh-18,ceh-2,ceh-28,ceh-31,ceh-34,ces-1,che-1,cog-1,crh-2,daf-16,dpl-1,dsc-1,dve-1,efl-1,egl-13,egl-5,elt-2,elt-3,eor-1,fkh-10,fkh-8,fos-1,hif-1,him-1,hlh-1,hlh-30,hlh-6,hmg-11,jun-1,lin-35,lir-3,lsy-12,lsy-2,mdl-1,mls-2,nfya-1,nhr-20,nhr-21,nhr-23,nhr-47,nhr-48,nhr-71,nhr-80,nhr-90,pha-4,pqm-1,pros-1,rbr-2,repo-1,rnt-1,sdc-2,sem-4,sma-3,…
chrI	4490649	4490800	True	False	.	.	HOT	59	C34F6.9,F13H6.1,F37D6.2,aly-1,cebp-1,ceh-14,ceh-18,ceh-2,ceh-31,ceh-34,che-1,cog-1,crh-2,daf-16,dpl-1,dsc-1,dve-1,efl-1,egl-13,egl-5,elt-3,eor-1,fkh-10,fkh-8,fos-1,hif-1,him-1,hlh-30,hlh-6,lin-35,lsy-12,lsy-2,mdl-1,mls-2,nfya-1,nhr-20,nhr-21,nhr-23,nhr-47,nhr-48,nhr-71,nhr-90,pha-4,rbr-2,repo-1,rnt-1,sdc-2,sem-4,sma-3,snpc-4,snu-23,sptf-1,swsn-7,syd-9,tbx-2,unc-42,unc-86,xbp-1,ztf-4
chrI	4491563	4491714	True	False	Mix3	stable	none	0	.
chrI	4492456	4492607	True	False	.	.	none	0	.
chrI	4493412	4493563	False	False	.	.	cold	3	elt-1,lsy-2,unc-55
chrI	4493781	4493932	True	False	.	.	none	0	.
chrI	4494108	4494259	True	False	.	.	cold	4	fkh-10,nhr-71,snu-23,unc-42
chrI	4494841	4494992	True	False	.	.	cold	3	cebp-1,fkh-8,sptf-1
chrI	4495089	4495240	True	False	Mix1	stable	none	0	.
chrI	4495790	4495941	False	True	.	.	none	0	.
chrI	4496738	4496889	True	False	.	.	cold	9	C34F6.9,ces-1,efl-1,eor-1,fkh-10,lsy-2,mls-2,nfya-1,unc-42
chrI	4511189	4511340	True	False	G3	stable	HOT	20	C16A3.4,C34F6.9,ces-1,crh-2,dpl-1,elt-2,eor-1,hif-1,lsy-2,nhr-23,nhr-47,nhr-71,npax-4,pha-4,skn-1,snu-23,sptf-1,unc-130,unc-42,unc-55
chrI	4516219	4516370	True	False	Mix2	stable	cold	12	daf-16,dve-1,elt-2,hlh-30,hmg-11,lsy-2,mdl-1,nhr-80,pha-4,snpc-4,snu-23,unc-55
chrI	4517044	4517195	True	False	I1	stable	cold	9	daf-16,dve-1,elt-2,fos-1,jun-1,nhr-80,pha-4,pqm-1,sma-9
chrI	4528963	4529114	False	True	.	.	cold	1	hlh-30
chrI	4534944	4535095	False	False	stable	stable	cold	7	eor-1,fkh-8,lsy-2,nhr-47,nhr-71,unc-55,xbp-1
chrI	4535550	4535701	False	False	.	.	none	0	.
chrI	4536076	4536227	True	False	Mix2	stable	HOT	105	B0035.1,C04F5.9,C16A3.4,C34F6.9,F13H6.1,F22D6.2,F37D6.2,F52B5.7,M03D4.4,R02D3.7,T07F8.4,aha-1,aly-2,atf-7,athp-1,blmp-1,cebp-1,ceh-14,ceh-18,ceh-2,ceh-22,ceh-28,ceh-31,ceh-34,ceh-48,ceh-82,ces-1,cog-1,crh-2,daf-16,die-1,dpl-1,dsc-1,duxl-1,dve-1,efl-1,egl-13,egl-5,elt-1,elt-2,elt-3,eor-1,ets-4,fkh-10,fkh-8,fos-1,gmeb-2,hif-1,him-1,hlh-1,hlh-30,hlh-8,hmg-11,irx-1,jun-1,let-607,lin-35,lir-3,lsy-12,l…
chrI	4537044	4537195	True	False	G3	stable	cold	4	efl-1,unc-130,xnd-1,ztf-18
chrI	4537268	4537419	True	False	.	.	cold	3	efl-1,unc-130,xnd-1
chrI	4539973	4540124	True	False	I2	stable	cold	7	daf-16,dve-1,elt-2,fos-1,nhr-80,pha-4,pqm-1
chrI	4557181	4557332	True	False	Mix2	stable	HOT	28	C34F6.9,F13H6.1,ceh-18,ceh-31,ceh-82,ces-1,cog-1,efl-1,egl-5,elt-2,eor-1,hlh-1,hlh-30,hmg-11,lin-35,lsy-2,mdl-1,mls-2,nfya-1,nhr-80,rnt-1,sma-9,snu-23,swsn-7,unc-42,unc-55,unc-86,xbp-1
chrI	4557669	4557820	False	False	.	.	none	0	.
chrI	4562452	4562603	True	True	.	.	none	0	.
chrI	4563236	4563387	True	True	.	.	none	0	.
chrI	4563938	4564089	False	False	stable	stable	cold	4	daf-16,hlh-1,lsy-2,rnt-1
chrI	4571027	4571178	True	False	.	.	cold	2	ces-1,unc-42
chrI	4573073	4573224	True	False	Mix8	stable	none	0	.
chrI	4573663	4573814	True	False	.	.	none	0	.
chrI	4574090	4574241	True	True	.	.	none	0	.
chrI	4574315	4574466	True	True	.	.	none	0	.
chrI	4578516	4578667	True	False	.	.	cold	1	pqm-1
chrI	4578895	4579046	True	False	.	.	cold	7	crh-2,daf-16,elt-2,fos-1,let-607,nhr-80,pqm-1
chrI	4582321	4582472	False	True	.	.	cold	1	cebp-1
chrI	4583673	4583824	True	False	.	.	cold	5	F49E8.2,cebp-1,nhr-71,rnt-1,snpc-3.4
chrI	4584051	4584202	True	False	.	.	none	0	.
chrI	4584343	4584494	False	False	.	.	none	0	.
chrI	4584780	4584931	False	False	stable	stable	HOT	99	C04F5.9,C16A3.4,C34F6.9,F13H6.1,F23B12.7,F37D6.2,F49E8.2,M03D4.4,R02D3.7,ZK546.5,aha-1,athp-1,blmp-1,cebp-1,ceh-18,ceh-2,ceh-28,ceh-30,ceh-31,ceh-34,ceh-82,ceh-90,ces-1,cog-1,crh-2,daf-16,dpl-1,dsc-1,duxl-1,dve-1,efl-1,egl-13,egl-5,elt-1,elt-2,elt-3,eor-1,ets-4,fkh-10,fkh-8,fos-1,hif-1,hlh-1,hlh-30,hmg-11,irx-1,jun-1,let-607,lin-35,lir-3,lsy-12,lsy-2,madf-10,mdl-1,mls-2,nfya-1,nhr-102,nhr-20,nhr-…
chrI	4585167	4585318	True	False	.	.	none	0	.
chrI	4586268	4586419	True	False	.	.	none	0	.
chrI	4587125	4587276	True	False	.	.	cold	1	ztf-18
chrI	4587581	4587732	False	False	.	.	cold	1	ztf-18
chrI	4591095	4591246	True	True	.	.	cold	4	daf-16,dve-1,elt-2,nhr-80
chrI	4592364	4592515	False	False	stable	stable	cold	4	elt-2,fos-1,nhr-80,pqm-1
chrI	4593490	4593641	False	True	stable	I+H [1]	cold	8	daf-16,elt-2,fos-1,jun-1,nhr-80,pha-4,pqm-1,sma-9
chrI	4596363	4596514	False	False	.	.	cold	4	elt-2,fos-1,nhr-80,pqm-1
chrI	4597725	4597876	True	False	.	.	cold	12	daf-16,dve-1,elt-2,fos-1,him-1,hlh-30,madf-10,nhr-102,nhr-48,nhr-80,pha-4,pqm-1
chrI	4602984	4603135	False	False	stable	stable	HOT	45	C16A3.4,C34F6.9,F13H6.1,F23B12.7,R02D3.7,cebp-1,ceh-2,ceh-28,ceh-31,ceh-48,ceh-82,ces-1,dpl-1,dsc-1,dve-1,efl-1,elt-2,eor-1,fkh-8,hlh-30,hmg-11,hnd-1,lin-35,lsy-2,mls-2,nfya-1,nhr-102,nhr-20,nhr-23,nhr-25,nhr-47,nhr-71,nhr-80,nhr-90,pha-2,rnt-1,rpc-1,sma-3,snu-23,swsn-7,tbx-2,ttx-3,unc-55,unc-86,xbp-1
chrI	4633333	4633484	True	False	Mix8	stable	cold	1	pha-2
chrI	4633606	4633757	True	False	Mix8	stable	HOT	83	C04F5.9,C16A3.4,C34F6.9,F23B12.7,F49E8.2,M03D4.4,R02D3.7,blmp-1,cebp-1,ceh-14,ceh-2,ceh-28,ceh-31,ceh-34,ceh-48,ceh-82,ceh-90,ces-1,che-1,cog-1,crh-2,daf-16,dpl-1,dsc-1,duxl-1,dve-1,efl-1,egl-13,egl-5,elt-2,elt-3,eor-1,fax-1,fos-1,gmeb-2,hif-1,him-1,hlh-1,hlh-30,hmg-11,hnd-1,irx-1,let-607,lin-35,lir-3,lsy-2,madf-10,madf-2,mdl-1,nfya-1,nhr-20,nhr-21,nhr-23,nhr-25,nhr-47,nhr-90,npax-4,pax-1,pha-2,p…
chrI	4635185	4635336	False	False	.	.	none	0	.
chrI	4635874	4636025	False	False	.	.	none	0	.
chrI	4636448	4636599	True	False	I1	stable	cold	14	F13H6.1,crh-2,daf-16,dve-1,elt-2,elt-3,fos-1,nhr-20,nhr-80,nhr-90,pha-4,pqm-1,sma-9,snu-23
chrI	4643340	4643491	True	False	I2	stable	cold	3	fos-1,nhr-80,pqm-1
chrI	4644363	4644514	False	False	stable	stable	HOT	59	C16A3.4,C34F6.9,F13H6.1,aha-1,cebp-1,ceh-14,ceh-18,ceh-30,ceh-31,ces-1,cog-1,crh-2,daf-16,dpl-1,dsc-1,dve-1,efl-1,egl-13,egl-5,elt-2,eor-1,fkh-8,fos-1,hif-1,him-1,hlh-1,hlh-30,hmg-11,irx-1,jun-1,lin-35,lsy-2,madf-10,mdl-1,nfya-1,nhr-20,nhr-23,nhr-25,nhr-47,nhr-48,nhr-71,nhr-80,pha-4,rbr-2,rnt-1,sem-4,sma-9,snpc-4,snu-23,spr-1,sptf-1,swsn-7,unc-130,unc-42,unc-55,unc-86,xbp-1,zfp-2,ztf-4
chrI	4645460	4645611	True	False	.	.	HOT	28	B0035.1,B0261.1,F49E8.2,F52B5.7,T07F8.4,T26A5.8,aly-2,atf-7,athp-1,cebp-1,ceh-79,die-1,dsc-1,efl-1,him-1,madf-10,mxl-1,nhr-90,rec-8,repo-1,rpc-1,snpc-1.1,snpc-3.4,snpc-4,snu-23,unc-130,xnd-1,ztf-18
chrI	4645885	4646036	True	False	.	.	none	0	.
chrI	4646521	4646672	True	False	.	.	none	0	.
chrI	4646795	4646946	True	False	.	.	none	0	.
chrI	4647198	4647349	False	False	stable	stable	HOT	72	C16A3.4,C34F6.9,F23B12.7,F37D6.2,F49E8.2,R02D3.7,ZK546.5,aha-1,aly-2,blmp-1,cebp-1,ceh-18,ceh-28,ceh-31,ceh-34,ceh-82,ces-1,cog-1,crh-2,daf-16,dpl-1,dsc-1,dve-1,efl-1,egl-5,elt-2,elt-3,eor-1,fkh-10,fkh-8,fos-1,hif-1,hlh-1,hlh-30,hmg-11,jun-1,lin-35,lir-3,lsy-2,madf-10,mdl-1,nfya-1,nhr-20,nhr-21,nhr-23,nhr-25,nhr-47,nhr-71,nhr-80,nhr-90,pha-4,pqm-1,rbr-2,rnt-1,sem-4,skn-1,sma-3,sma-9,snpc-4,snu-23…
chrI	4649595	4649746	True	False	.	.	none	0	.
chrI	4651045	4651196	True	False	.	.	cold	12	cebp-1,daf-16,dve-1,egl-5,elt-2,eor-1,fos-1,hif-1,hlh-1,let-607,nhr-80,nhr-90
chrI	4651819	4651970	True	False	Mix2	stable	HOT	32	C34F6.9,F13H6.1,blmp-1,cebp-1,ceh-18,ceh-34,crh-2,daf-16,dve-1,efl-1,elt-2,eor-1,fkh-8,fos-1,hlh-30,hmg-11,lin-35,lsy-2,nfya-1,nhr-25,nhr-47,nhr-71,nhr-80,pha-4,pqm-1,snpc-4,snu-23,swsn-7,tbx-2,unc-42,unc-55,xbp-1
chrI	4652512	4652663	False	False	.	.	none	0	.
chrI	4652973	4653124	True	False	Mix8	stable	cold	2	lsy-2,nhr-80
chrI	4653238	4653389	True	False	G1	stable	cold	4	C04F5.9,efl-1,lsy-2,xnd-1
chrI	4653802	4653953	False	False	stable	stable	HOT	31	atf-7,blmp-1,cebp-1,crh-2,daf-16,die-1,dve-1,elt-1,elt-2,elt-3,eor-1,hlh-30,jun-1,lsy-2,mdl-1,nhr-20,nhr-23,nhr-25,nhr-47,nhr-48,nhr-85,nhr-90,ref-2,sma-3,sma-9,snpc-4,snu-23,spr-1,unc-86,zip-8,ztf-26
chrI	4654136	4654287	True	False	Mix2	stable	HOT	50	C34F6.9,F13H6.1,aly-1,cebp-1,ceh-18,ceh-28,ceh-31,ceh-34,ceh-48,ceh-82,cog-1,daf-16,die-1,efl-1,egl-5,elt-2,elt-3,eor-1,fkh-8,fos-1,hlh-1,hlh-30,hmg-11,let-607,lin-35,lsy-12,lsy-2,madf-10,mdl-1,nfya-1,nhr-20,nhr-47,nhr-48,nhr-71,nhr-80,nhr-90,pqm-1,rbr-2,ref-2,rnt-1,sdc-2,sma-9,snpc-4,snu-23,spr-1,swsn-7,tbx-2,unc-55,xbp-1,ztf-18
chrI	4654873	4655024	True	False	.	.	none	0	.
chrI	4655324	4655475	False	False	stable	stable	none	0	.
chrI	4660195	4660346	True	False	.	.	none	0	.
chrI	4662521	4662672	True	False	.	.	none	0	.
chrI	4663420	4663571	True	False	Mix7	stable	none	0	.
chrI	4667820	4667971	False	True	.	.	cold	1	ceh-28
chrI	4671789	4671940	True	False	Mix6	stable	cold	9	crh-2,efl-1,irx-1,let-607,nhr-23,nhr-47,rnt-1,swsn-7,xbp-1
chrI	4672239	4672390	False	False	stable	stable	HOT	36	C16A3.4,C34F6.9,F13H6.1,F23B12.7,atf-7,ceh-18,ceh-34,ces-1,cog-1,daf-16,dpl-1,dve-1,efl-1,eor-1,hif-1,hlh-1,hlh-30,hmg-11,irx-1,lin-35,lsy-2,mdl-1,mls-2,nfya-1,nhr-23,nhr-71,nhr-80,pha-4,rbr-2,rnt-1,sma-9,snpc-4,snu-23,swsn-7,unc-55,xbp-1
chrI	4672728	4672879	True	False	.	.	cold	12	cebp-1,daf-16,dpl-1,elt-2,elt-3,fos-1,hlh-30,nhr-23,nhr-80,pqm-1,rnt-1,sma-3
chrI	4673918	4674069	True	False	.	.	HOT	52	C34F6.9,F13H6.1,F37D6.2,cebp-1,ceh-14,ceh-18,ceh-28,ceh-31,ceh-34,ceh-48,ceh-82,ces-1,crh-2,dsc-1,dve-1,efl-1,egl-13,elt-1,eor-1,fkh-10,fkh-8,hif-1,him-1,hlh-30,hlh-8,hmg-11,irx-1,lin-35,lsy-12,lsy-2,mdl-1,mls-2,nfya-1,nhr-20,nhr-21,nhr-25,nhr-47,nhr-71,pros-1,rbr-2,ref-2,rnt-1,sma-9,snpc-4,snu-23,swsn-7,tbx-2,unc-42,unc-55,unc-86,xbp-1,ztf-4
chrI	4677151	4677302	True	False	.	.	cold	2	nhr-80,unc-55
chrI	4677573	4677724	False	False	.	.	none	0	.
chrI	4679538	4679689	True	False	Mix7	stable	cold	6	atf-7,cebp-1,ceh-28,hif-1,repo-1,zip-8
chrI	4679919	4680070	False	True	.	.	none	0	.
chrI	4680280	4680431	False	True	.	.	none	0	.
chrI	4683709	4683860	False	False	.	.	cold	4	lsy-12,nhr-20,snpc-4,snu-23
chrI	4684500	4684651	True	False	.	.	cold	5	blmp-1,nhr-23,nhr-25,ref-2,snu-23
chrI	4699398	4699549	True	False	.	.	HOT	111	C04F5.9,C16A3.4,C34F6.9,F13H6.1,F22D6.2,F37D6.2,F52B5.7,M03D4.4,R02D3.7,ZK546.5,alr-1,aly-1,aly-2,atf-7,athp-1,blmp-1,cebp-1,ceh-14,ceh-18,ceh-2,ceh-22,ceh-28,ceh-31,ceh-34,ceh-48,ceh-82,ces-1,che-1,cog-1,crh-2,daf-16,dao-5,die-1,dpl-1,dsc-1,duxl-1,dve-1,efl-1,egl-13,egl-5,elt-2,elt-3,eor-1,fax-1,fkh-10,fkh-8,fos-1,hif-1,him-1,hlh-1,hlh-30,hlh-6,hlh-8,hmg-11,irx-1,jun-1,let-607,lin-35,lir-3,lsy-1…
chrI	4700231	4700382	False	False	.	.	cold	3	dve-1,lsy-2,nhr-71
chrI	4700505	4700656	True	False	.	.	cold	2	lsy-2,nhr-71
chrI	4701240	4701391	True	False	Mix2	stable	HOT	122	B0035.1,C04F5.9,C16A3.4,C34F6.9,F13H6.1,F22D6.2,F37D6.2,F52B5.7,M03D4.4,R02D3.7,T07F8.4,ZK546.5,aha-1,aly-1,aly-2,atf-7,athp-1,attf-4,blmp-1,cebp-1,ceh-14,ceh-18,ceh-2,ceh-28,ceh-30,ceh-31,ceh-32,ceh-34,ceh-36,ceh-82,ces-1,cog-1,crh-2,daf-16,dao-5,die-1,dpl-1,dsc-1,duxl-1,dve-1,efl-1,egl-13,egl-5,elt-1,elt-2,elt-3,eor-1,ets-4,ets-7,eyg-1,fax-1,fkh-10,fkh-8,fos-1,hif-1,him-1,hlh-1,hlh-30,hlh-8,hmg…
chrI	4701890	4702041	True	False	.	.	cold	1	zip-8
chrI	4702532	4702683	True	False	.	.	cold	7	ceh-36,dsc-1,egl-13,fkh-8,nhr-20,nhr-47,nhr-71
chrI	4703244	4703395	True	False	Mix4	stable	HOT	27	C34F6.9,F37D6.2,ceh-31,ceh-34,ceh-82,ces-1,cog-1,dsc-1,eor-1,fkh-10,fkh-8,hmg-11,lin-35,lsy-2,mls-2,nfya-1,nhr-47,nhr-71,rbr-2,ref-2,snu-23,sptf-1,swsn-7,unc-42,unc-55,unc-86,xbp-1
chrI	4704388	4704539	True	False	Mix8	stable	cold	3	C34F6.9,eor-1,lin-35
chrI	4714704	4714855	False	False	.	.	none	0	.
chrI	4715516	4715667	True	False	G3	stable	none	0	.
chrI	4720354	4720505	False	False	.	.	cold	1	let-607
chrI	4721125	4721276	False	False	stable	stable	HOT	21	C16A3.4,F13H6.1,crh-2,daf-16,dve-1,elt-2,elt-3,fos-1,hlh-30,jun-1,lin-35,nhr-102,nhr-20,nhr-21,nhr-23,nhr-48,nhr-80,pqm-1,skn-1,sma-9,snpc-4
chrI	4723919	4724070	False	True	stable	Mix5	none	0	.
chrI	4724494	4724645	False	True	.	.	none	0	.
chrI	4726647	4726798	True	False	.	.	cold	5	elt-2,fos-1,nhr-80,pqm-1,sma-9
chrI	4727149	4727300	False	False	stable	stable	cold	10	cebp-1,crh-2,daf-16,dve-1,efl-1,fos-1,nhr-80,sma-9,snu-23,zip-8
chrI	4728981	4729132	False	True	.	.	none	0	.
chrI	4730573	4730724	False	False	.	.	none	0	.
chrI	4731450	4731601	True	True	I2	Mix4	cold	4	blmp-1,cebp-1,hlh-30,nhr-23
chrI	4731983	4732134	False	True	.	.	cold	6	elt-2,elt-3,nhr-20,nhr-80,pqm-1,sma-9
chrI	4744815	4744966	False	False	stable	stable	cold	7	daf-16,elt-2,fos-1,mdl-1,nhr-80,pha-4,pqm-1
chrI	4745429	4745580	True	False	Mix6	stable	HOT	29	C34F6.9,F13H6.1,aly-1,ceh-18,ceh-22,ceh-31,ceh-34,cog-1,dve-1,efl-1,elt-2,eor-1,fkh-8,fos-1,hlh-1,hlh-30,hlh-8,hmg-11,lin-35,lsy-2,nfya-1,nhr-80,pha-4,ref-2,rnt-1,snu-23,sptf-1,swsn-7,tbx-2
chrI	4745830	4745981	True	False	.	.	none	0	.
chrI	4746553	4746704	True	False	.	.	cold	1	mls-2
chrI	4746927	4747078	True	False	.	.	cold	5	cebp-1,hlh-30,mls-2,nhr-80,pha-4
chrI	4747534	4747685	True	False	G3	stable	cold	12	C34F6.9,crh-2,dpl-1,efl-1,eor-1,lin-35,lsy-2,nhr-20,pha-4,snu-23,unc-55,xbp-1
chrI	4747861	4748012	True	False	Mix8	stable	none	0	.
chrI	4748850	4749001	False	False	.	.	none	0	.
chrI	4749165	4749316	False	False	.	.	cold	1	ces-1
chrI	4750434	4750585	True	False	.	.	none	0	.
chrI	4750902	4751053	False	False	.	.	none	0	.
chrI	4751694	4751845	False	False	.	.	none	0	.
chrI	4753533	4753684	False	False	.	.	none	0	.
chrI	4754998	4755149	True	True	.	.	cold	2	B0261.1,rpc-1
chrI	4764905	4765056	False	False	.	.	none	0	.
chrI	4765611	4765762	True	False	G1	stable	cold	11	F49E8.2,T07F8.4,athp-1,cebp-1,die-1,efl-1,snpc-3.4,snpc-4,unc-130,xnd-1,ztf-18
chrI	4766200	4766351	True	False	.	.	none	0	.
chrI	4766999	4767150	False	True	.	.	none	0	.
chrI	4767358	4767509	False	False	.	.	none	0	.
chrI	4767826	4767977	True	False	.	.	HOT	21	cebp-1,ceh-31,efl-1,eor-1,fax-1,hif-1,let-607,lin-35,lir-3,lsy-2,nhr-47,nhr-71,nhr-80,rnt-1,snu-23,swsn-7,tbx-2,unc-130,unc-55,unc-86,xbp-1
chrI	4769309	4769460	True	False	Mix8	stable	HOT	25	F22D6.2,F52B5.7,athp-1,dao-5,dpl-1,efl-1,egl-13,fkh-10,lin-35,lir-3,lsy-2,mdl-1,nhr-20,nhr-21,nhr-23,nhr-25,rec-8,snpc-4,snu-23,swsn-7,tbx-2,unc-86,xnd-1,zip-5,ztf-11
chrI	4769598	4769749	False	False	stable	stable	HOT	71	B0035.1,B0261.1,C04F5.9,F13H6.1,F22D6.2,F37D6.2,F52B5.7,R02D3.7,ZK546.5,atf-7,athp-1,cebp-1,ceh-18,ceh-34,ceh-90,daf-16,dao-5,dpl-1,dsc-1,duxl-1,dve-1,efl-1,egl-13,elt-2,eor-1,fkh-10,fkh-8,hif-1,him-1,hmg-11,irx-1,let-607,lin-35,lir-3,lsy-12,lsy-2,madf-10,mdl-1,nhr-102,nhr-20,nhr-21,nhr-23,nhr-25,nhr-47,nhr-48,nhr-71,nhr-80,nhr-85,nhr-90,rbr-2,rec-8,ref-2,repo-1,rnt-1,sma-3,sma-9,snpc-4,snu-23,sp…
chrI	4769975	4770126	False	False	stable	stable	cold	1	rnt-1
chrI	4771997	4772148	True	False	.	.	cold	4	elt-2,fos-1,nhr-80,pqm-1
chrI	4773074	4773225	False	False	stable	stable	HOT	51	C16A3.4,C34F6.9,F13H6.1,R02D3.7,atf-7,blmp-1,cebp-1,ceh-18,ceh-28,ceh-31,ces-1,cog-1,crh-2,daf-16,dpl-1,dsc-1,dve-1,efl-1,egl-5,eor-1,fkh-8,fos-1,hlh-30,hmg-11,irx-1,jun-1,lin-35,lsy-2,mdl-1,nfya-1,nhr-20,nhr-21,nhr-23,nhr-47,nhr-71,nhr-80,nhr-85,pha-4,rbr-2,rnt-1,skn-1,sma-3,sma-9,snu-23,sptf-1,swsn-7,tbx-2,unc-55,unc-86,xbp-1,zip-8
chrI	4774153	4774304	False	False	.	.	none	0	.
chrI	4775883	4776034	True	True	.	.	cold	1	nhr-80
chrI	4777520	4777671	False	False	.	.	none	0	.
chrI	4777883	4778034	True	False	N+M	stable	none	0	.
chrI	4778865	4779016	False	False	.	.	cold	1	pha-4
chrI	4779859	4780010	True	False	.	.	none	0	.
chrI	4780452	4780603	True	False	.	.	cold	3	ceh-2,ceh-34,tbx-2
chrI	4781441	4781592	True	False	.	.	none	0	.
chrI	4782403	4782554	False	False	.	.	cold	1	ces-1
chrI	4785516	4785667	True	False	G3	stable	cold	4	snpc-1.1,snpc-3.4,snpc-4,xnd-1
chrI	4785674	4785825	True	False	.	.	cold	4	snpc-1.1,snpc-3.4,snpc-4,xnd-1
chrI	4786045	4786196	True	False	.	.	cold	7	ceh-18,egl-5,eor-1,hlh-1,nhr-71,rnt-1,snu-23
chrI	4786322	4786473	True	False	.	.	none	0	.
chrI	4786970	4787121	True	False	H	stable	cold	3	egl-5,lsy-2,rnt-1
chrI	4787925	4788076	True	False	.	.	cold	5	mls-2,nhr-25,ref-2,unc-86,ztf-11
chrI	4788541	4788692	False	False	stable	stable	HOT	23	C16A3.4,C34F6.9,ces-1,dpl-1,efl-1,egl-5,hlh-30,lin-35,lsy-2,nhr-20,nhr-23,nhr-47,nhr-71,nhr-90,pha-4,rnt-1,sem-4,snpc-4,snu-23,swsn-7,unc-130,unc-55,xbp-1
chrI	4788967	4789118	False	False	stable	stable	cold	8	ZK546.5,dpl-1,efl-1,eor-1,hlh-1,lin-35,nfya-1,rnt-1
chrI	4789930	4790081	False	False	stable	stable	HOT	111	B0035.1,C04F5.9,C16A3.4,C34F6.9,F13H6.1,F22D6.2,F23B12.7,F37D6.2,F49E8.2,F52B5.7,M03D4.4,R02D3.7,ZK546.5,aha-1,aly-2,atf-7,athp-1,blmp-1,cebp-1,ceh-18,ceh-2,ceh-28,ceh-31,ceh-32,ceh-34,ceh-48,ceh-82,ceh-90,ces-1,cog-1,crh-2,daf-16,dpff-1,dpl-1,dsc-1,duxl-1,dve-1,efl-1,egl-13,egl-5,elt-1,elt-2,elt-3,eor-1,fkh-10,fkh-8,fos-1,hif-1,him-1,hlh-1,hlh-30,hmg-11,irx-1,jun-1,let-607,lin-35,lir-3,lsy-12,ls…
chrI	4790442	4790593	True	False	.	.	cold	1	dao-5
chrI	4790776	4790927	True	False	.	.	HOT	22	B0035.1,F49E8.2,F52B5.7,T07F8.4,atf-7,athp-1,cebp-1,dao-5,die-1,efl-1,him-1,mxl-1,nhr-21,nhr-47,nhr-71,nhr-90,snpc-1.1,snpc-3.4,unc-130,xnd-1,ztf-18,ztf-4
chrI	4792536	4792687	False	False	stable	stable	cold	17	C34F6.9,F13H6.1,daf-16,hif-1,hlh-1,hlh-30,lin-35,lir-3,lsy-2,nhr-20,nhr-71,rnt-1,sma-9,snu-23,swsn-7,xbp-1,ztf-4
chrI	4803980	4804131	True	False	.	.	none	0	.
chrI	4804470	4804621	False	False	stable	stable	cold	18	C34F6.9,F13H6.1,ceh-18,eor-1,hlh-1,hlh-30,jun-1,let-607,lsy-2,madf-10,nhr-20,nhr-71,nhr-90,rnt-1,snu-23,swsn-7,unc-130,unc-55
chrI	4804847	4804998	True	False	.	.	cold	8	cebp-1,daf-16,dve-1,elt-2,fos-1,hlh-30,nhr-80,pqm-1
chrI	4805432	4805583	True	False	G4	stable	HOT	20	C34F6.9,ces-1,dpl-1,dsc-1,efl-1,eor-1,fkh-8,lin-35,lsy-2,nhr-47,nhr-71,pha-4,rbr-2,rnt-1,snu-23,swsn-7,unc-130,unc-55,unc-86,xbp-1
chrI	4810595	4810746	True	False	.	.	cold	1	ces-1
chrI	4816106	4816257	True	False	.	.	none	0	.
chrI	4818485	4818636	True	False	Mix6	stable	cold	5	ces-1,dsc-1,eor-1,unc-42,unc-55
chrI	4826863	4827014	True	False	G2	stable	none	0	.
chrI	4829892	4830043	False	False	stable	stable	cold	4	dpl-1,efl-1,lin-35,unc-55
chrI	4835334	4835485	False	False	.	.	none	0	.
chrI	4840967	4841118	True	False	.	.	cold	11	C34F6.9,F13H6.1,ceh-18,daf-16,lir-3,lsy-2,nhr-71,rnt-1,sma-9,snu-23,unc-130
chrI	4847265	4847416	True	False	.	.	cold	3	daf-16,dve-1,elt-3
chrI	4847721	4847872	True	False	.	.	cold	5	daf-16,elt-2,fos-1,nhr-80,pqm-1
chrI	4848053	4848204	True	False	.	.	cold	4	ces-1,nhr-47,snu-23,unc-55
chrI	4848726	4848877	True	False	.	.	cold	2	efl-1,xnd-1
chrI	4861976	4862127	True	False	.	.	cold	1	rnt-1
chrI	4864006	4864157	True	False	.	.	cold	3	ces-1,fkh-10,unc-42
chrI	4876017	4876168	True	False	.	.	cold	1	unc-55
chrI	4878520	4878671	True	False	.	.	cold	1	pax-1
chrI	4879558	4879709	False	False	.	.	cold	3	hlh-1,lsy-2,unc-55
chrI	4881271	4881422	True	False	.	.	cold	11	C34F6.9,ces-1,cog-1,egl-5,eor-1,hlh-1,nhr-23,rnt-1,sma-9,tbx-2,unc-42
chrI	4881925	4882076	True	False	.	.	cold	1	unc-55
chrI	4885730	4885881	False	False	.	.	none	0	.
chrI	4886484	4886635	False	False	.	.	none	0	.
chrI	4887983	4888134	True	False	Mix8	stable	cold	2	nhr-20,snu-23
chrI	4888473	4888624	True	False	.	.	cold	2	ces-1,unc-42
chrI	4893654	4893805	True	False	.	.	cold	2	snu-23,unc-130
chrI	4895601	4895752	True	False	.	.	cold	1	xnd-1
chrI	4895845	4895996	True	False	G2	stable	cold	1	xnd-1
chrI	4900956	4901107	True	False	N+M	stable	cold	7	C34F6.9,ces-1,eor-1,him-1,hmg-11,lsy-2,unc-55
chrI	4906725	4906876	True	False	N+M	stable	HOT	22	F37D6.2,ceh-48,crh-2,dsc-1,eor-1,fkh-10,fkh-8,him-1,hlh-30,hmg-11,lin-35,lsy-2,madf-10,nhr-47,rbr-2,snpc-4,snu-23,swsn-7,unc-42,unc-55,unc-86,xbp-1
chrI	4907844	4907995	True	False	.	.	none	0	.
chrI	4908177	4908328	True	False	.	.	HOT	25	C34F6.9,F37D6.2,atf-7,crh-2,dsc-1,egl-13,egl-5,fkh-10,fkh-8,lsy-2,mef-2,nhr-20,nhr-21,nhr-47,nhr-71,sem-4,sma-9,snu-23,swsn-7,tbx-2,unc-42,unc-55,unc-86,xbp-1,ztf-4
chrI	4908993	4909144	False	False	.	.	cold	10	C34F6.9,fkh-8,hlh-30,lsy-2,mdl-1,rbr-2,snpc-4,unc-55,unc-86,ztf-4
chrI	4911562	4911713	False	False	.	.	HOT	33	F22D6.2,F52B5.7,aly-2,atf-7,athp-1,cebp-1,ceh-16,crh-2,dve-1,elt-2,him-1,hlh-30,jun-1,let-607,lsy-12,lsy-2,madf-10,mxl-1,nhr-102,nhr-20,nhr-21,nhr-25,nhr-47,nhr-48,nhr-71,nhr-90,pha-4,rbr-2,repo-1,sma-3,snpc-4,snu-23,ztf-4
chrI	4911949	4912100	False	False	.	.	cold	11	F23B12.7,dmd-4,eor-1,fkh-8,him-1,lsy-2,nhr-21,nhr-23,nhr-237,snu-23,unc-42
chrI	4912271	4912422	False	False	.	.	none	0	.
chrI	4913289	4913440	False	False	.	.	cold	3	F52B5.7,atf-7,eor-1
chrI	4913871	4914022	False	False	.	.	none	0	.
chrI	4914329	4914480	True	False	Mix3	stable	HOT	42	C04F5.9,C16A3.4,C34F6.9,F13H6.1,blmp-1,cebp-1,ceh-28,crh-2,daf-16,dpl-1,dve-1,elt-2,elt-3,fkh-8,fos-1,hlh-30,jun-1,let-607,lin-35,lsy-2,madf-10,mdl-1,nhr-102,nhr-20,nhr-21,nhr-23,nhr-25,nhr-47,nhr-71,nhr-80,nhr-85,nhr-90,pha-4,pqm-1,rbr-2,rnt-1,sma-3,sma-9,snu-23,swsn-7,unc-130,xbp-1
chrI	4914956	4915107	True	False	.	.	cold	15	ceh-31,ces-1,dsc-1,fkh-10,fkh-8,hlh-30,mdl-1,nhr-71,sma-9,snu-23,sptf-1,swsn-7,unc-42,unc-86,xbp-1
chrI	4915453	4915604	True	False	.	.	cold	3	daf-16,eor-1,nhr-80
chrI	4915705	4915856	True	False	.	.	cold	1	unc-55
chrI	4916188	4916339	True	False	I1	stable	HOT	21	F22D6.2,blmp-1,daf-16,dve-1,elt-1,elt-2,elt-3,fos-1,hlh-30,lsy-2,mdl-1,nhr-20,nhr-23,nhr-71,nhr-80,nhr-85,nhr-90,pha-4,pqm-1,sma-9,snu-23
chrI	4916447	4916598	True	False	Mix3	stable	HOT	26	C16A3.4,cebp-1,crh-2,daf-16,dve-1,elt-1,elt-2,fkh-8,fos-1,him-1,hlh-30,irx-1,lin-35,lsy-2,mdl-1,nhr-20,nhr-23,nhr-47,nhr-71,nhr-80,nhr-85,pqm-1,sem-4,sma-9,snu-23,swsn-7
chrI	4916758	4916909	False	False	.	.	cold	2	cebp-1,pha-4
chrI	4917427	4917578	True	False	.	.	cold	14	daf-16,dpl-1,dve-1,elt-2,elt-3,eor-1,fos-1,nhr-20,nhr-71,nhr-80,nhr-85,pha-4,sma-3,snu-23
chrI	4917702	4917853	True	False	G4	stable	HOT	19	C16A3.4,C34F6.9,ceh-31,die-1,dpl-1,eor-1,fkh-8,hlh-30,lsy-2,mls-2,nfya-1,rbr-2,sem-4,snpc-4,swsn-7,tbx-2,unc-55,vab-15,xnd-1
chrI	4918188	4918339	False	False	stable	stable	cold	6	blmp-1,elt-1,hlh-30,mdl-1,nhr-85,snu-23
chrI	4921216	4921367	False	False	stable	stable	cold	3	hlh-30,lsy-2,unc-55
chrI	4926485	4926636	False	False	stable	stable	HOT	86	C16A3.4,C34F6.9,F13H6.1,F23B12.7,F37D6.2,F49E8.2,R02D3.7,ZK546.5,aly-2,athp-1,cebp-1,ceh-14,ceh-18,ceh-2,ceh-28,ceh-31,ceh-34,ceh-82,ces-1,cog-1,crh-2,daf-16,dpl-1,dsc-1,dve-1,efl-1,egl-5,elt-1,elt-2,elt-3,eor-1,ets-4,fkh-10,fkh-8,fos-1,hif-1,him-1,hlh-30,hmg-11,irx-1,jun-1,lin-35,lir-3,lsy-2,madf-10,mdl-1,mls-2,nfya-1,nhr-10,nhr-102,nhr-20,nhr-21,nhr-23,nhr-25,nhr-47,nhr-71,nhr-80,nhr-85,nhr-90,…
chrI	4928755	4928906	True	False	.	.	cold	2	daf-16,pha-4
chrI	4930374	4930525	True	False	.	.	cold	2	ces-1,unc-42
chrI	4931612	4931763	True	False	.	.	none	0	.
chrI	4932201	4932352	False	False	.	.	none	0	.
chrI	4932485	4932636	True	False	.	.	none	0	.
chrI	4932958	4933109	True	False	Mix6	stable	HOT	47	C34F6.9,F13H6.1,atf-7,cebp-1,ceh-2,ceh-31,ceh-34,ceh-48,ces-1,cog-1,daf-16,die-1,dsc-1,efl-1,egl-5,eor-1,fkh-10,fkh-8,him-1,hlh-30,hlh-6,hlh-8,hmg-11,lin-35,lsy-2,mdl-1,mls-2,nfya-1,nhr-47,nhr-71,pha-4,pros-1,rbr-2,rnt-1,sem-4,sma-3,sma-9,snpc-4,snu-23,swsn-7,syd-9,tbx-2,unc-55,unc-86,xbp-1,ztf-16,ztf-4
chrI	4933288	4933439	False	False	.	.	cold	10	blmp-1,ceh-18,elt-2,fos-1,let-607,nhr-25,nhr-80,pqm-1,snu-23,syd-9
chrI	4933463	4933614	False	False	.	.	cold	1	nhr-80
chrI	4933880	4934031	False	False	.	.	cold	2	elt-1,hlh-1
chrI	4934223	4934374	False	False	.	.	cold	1	cebp-1
chrI	4936116	4936267	True	False	.	.	cold	15	F13H6.1,M03D4.4,ceh-18,ceh-34,ces-1,dsc-1,egl-5,eor-1,hlh-8,nfya-1,rnt-1,snu-23,tbx-2,tbx-7,unc-130
chrI	4936355	4936506	True	False	.	.	cold	17	F13H6.1,M03D4.4,ceh-18,ceh-34,ces-1,dsc-1,eor-1,hlh-1,hlh-8,nfya-1,nhr-71,rnt-1,sma-9,snu-23,tbx-2,tbx-7,unc-55
chrI	4936970	4937121	False	False	.	.	none	0	.
chrI	4937245	4937396	False	True	.	.	none	0	.
chrI	4939893	4940044	True	False	.	.	cold	3	egl-5,snpc-1.1,snpc-4
chrI	4941036	4941187	True	False	.	.	cold	18	cebp-1,cog-1,dsc-1,eor-1,hlh-30,irx-1,lin-35,lir-3,lsy-2,mef-2,nhr-20,nhr-71,rnt-1,sma-9,snu-23,unc-130,vab-15,xbp-1
chrI	4941309	4941460	True	False	N+M	stable	HOT	35	F13H6.1,M03D4.4,cebp-1,ceh-18,ceh-31,ceh-34,cog-1,daf-16,dsc-1,eor-1,hlh-1,hlh-30,hlh-6,hlh-8,irx-1,lin-35,lir-3,lsy-2,mef-2,nfya-1,nhr-20,nhr-47,nhr-71,rnt-1,sdc-2,sma-9,snu-23,sptf-1,swsn-7,syd-9,tbx-2,unc-130,unc-55,xbp-1,ztf-4
chrI	4941824	4941975	False	False	.	.	none	0	.
chrI	4942238	4942389	False	False	.	.	none	0	.
chrI	4942672	4942823	False	False	.	.	cold	1	ceh-34
chrI	4943036	4943187	False	False	.	.	cold	4	daf-16,dsc-1,hlh-8,rnt-1
chrI	4943346	4943497	False	False	stable	stable	cold	1	daf-16
chrI	4952639	4952790	False	False	.	.	cold	2	daf-16,unc-55
chrI	4953474	4953625	False	True	.	.	none	0	.
chrI	4954287	4954438	False	False	.	.	cold	1	daf-16
chrI	4958259	4958410	True	False	G4	stable	cold	4	dpl-1,efl-1,lin-35,pha-4
chrI	4958773	4958924	True	False	G1	stable	HOT	24	F13H6.1,ahr-1,ceh-14,ceh-2,ceh-31,ceh-34,efl-1,fax-1,hlh-6,hlh-8,lim-6,lin-35,nhr-80,ref-2,rnt-1,snpc-3.4,sptf-1,tbx-2,tbx-7,unc-130,unc-55,xnd-1,zip-5,ztf-18
chrI	4959202	4959353	True	False	.	.	cold	4	ceh-31,nhr-80,tbx-2,zip-5
chrI	4961787	4961938	True	False	.	.	cold	1	ceh-31
chrI	4962150	4962301	True	False	G3	stable	none	0	.
chrI	4967402	4967553	True	False	G3	stable	HOT	79	C16A3.4,C34F6.9,F13H6.1,F23B12.7,K02D7.2,T07F8.4,ahr-1,athp-1,ceh-14,ceh-18,ceh-2,ceh-31,ceh-34,che-1,cog-1,crh-2,dpl-1,dsc-1,dve-1,efl-1,egl-13,elt-2,eor-1,ets-4,ets-7,fax-1,fkh-8,hif-1,him-1,hlh-15,hlh-30,hlh-6,hlh-8,hnd-1,irx-1,lim-6,lin-35,lir-3,lsy-12,lsy-2,madf-10,mdl-1,mls-2,nfya-1,nhr-20,nhr-23,nhr-25,nhr-47,nhr-71,nhr-80,nhr-90,pha-2,pha-4,pqm-1,rbr-2,ref-2,rnt-1,sma-3,sma-9,snpc-1.1,snp…
chrI	4967575	4967726	True	False	I2	stable	HOT	81	C16A3.4,C34F6.9,F13H6.1,F23B12.7,F49E8.2,K02D7.2,T07F8.4,ahr-1,athp-1,ceh-14,ceh-18,ceh-2,ceh-31,ceh-34,che-1,cog-1,crh-2,dpl-1,dsc-1,dve-1,efl-1,egl-13,elt-2,eor-1,ets-4,ets-7,fax-1,fkh-8,hif-1,him-1,hlh-15,hlh-30,hlh-6,hlh-8,hnd-1,irx-1,lim-6,lin-35,lir-3,lsy-12,lsy-2,madf-10,mdl-1,mls-2,nfya-1,nhr-20,nhr-23,nhr-25,nhr-47,nhr-71,nhr-80,nhr-90,pha-2,pha-4,pqm-1,rbr-2,ref-2,rnt-1,sma-3,sma-9,snpc…
chrI	4972371	4972522	True	False	.	.	cold	1	ces-1
chrI	4973150	4973301	True	False	Mix5	stable	cold	6	ceh-31,ces-1,dsc-1,mls-2,ttx-3,unc-42
chrI	4973710	4973861	False	True	.	.	none	0	.
chrI	4974159	4974310	False	False	.	.	none	0	.
chrI	4974788	4974939	True	False	.	.	HOT	26	F13H6.1,M03D4.4,ceh-18,ceh-31,daf-16,dpl-1,dsc-1,eor-1,hlh-1,hlh-8,lin-35,lsy-2,nfya-1,nhr-20,nhr-25,nhr-47,nhr-71,pag-3,rnt-1,sem-4,snu-23,swsn-7,tbx-2,unc-55,xbp-1,ztf-11
chrI	4975154	4975305	True	False	.	.	cold	3	ces-1,unc-42,unc-55
chrI	4975957	4976108	True	False	.	.	none	0	.
chrI	4976279	4976430	True	False	.	.	cold	17	C34F6.9,aly-1,ceh-14,ceh-18,ceh-31,ces-1,hlh-6,lsy-2,nhr-71,rbr-2,ref-2,sem-4,snu-23,tbx-2,unc-42,unc-55,unc-86
chrI	4977442	4977593	True	False	.	.	cold	1	pha-4
chrI	4980087	4980238	False	False	stable	stable	cold	7	ceh-18,ces-1,dve-1,elt-2,fos-1,pha-4,unc-55
chrI	4980846	4980997	False	False	.	.	none	0	.
chrI	4992214	4992365	False	False	stable	stable	cold	4	dpl-1,efl-1,lin-35,nhr-25
chrI	4993698	4993849	True	False	.	.	cold	1	pha-4
chrI	4994147	4994298	False	False	.	.	cold	2	hlh-30,mdl-1
chrI	4994627	4994778	True	False	Mix6	stable	none	0	.
chrI	4996032	4996183	True	False	.	.	cold	1	ceh-48
chrI	4996599	4996750	False	False	stable	stable	cold	10	C34F6.9,ceh-28,dve-1,elt-2,lsy-2,nhr-20,nhr-80,sma-3,sma-9,snu-23
chrI	5008262	5008413	False	False	.	.	none	0	.
chrI	5008614	5008765	True	False	Mix3	stable	cold	1	snu-23
chrI	5010006	5010157	True	False	.	.	cold	17	blmp-1,crh-2,elt-3,hlh-30,lsy-2,mdl-1,nhr-20,nhr-21,nhr-23,nhr-25,nhr-71,nhr-85,nhr-90,sma-3,sma-9,snu-23,unc-130
chrI	5010666	5010817	True	False	.	.	none	0	.
chrI	5014764	5014915	False	True	.	.	cold	1	rnt-1
chrI	5015765	5015916	True	False	.	.	cold	16	C34F6.9,ceh-18,ces-1,daf-16,dsc-1,eor-1,hlh-1,lin-35,lsy-2,mdl-1,nhr-71,pag-3,rnt-1,sma-9,snu-23,swsn-7
chrI	5016198	5016349	True	False	.	.	none	0	.
chrI	5018106	5018257	True	False	Mix2	stable	cold	3	ceh-36,dsc-1,fkh-8
chrI	5020159	5020310	True	False	N+M	stable	HOT	23	C34F6.9,F13H6.1,ceh-18,ceh-34,daf-16,dsc-1,egl-5,eor-1,hlh-1,hlh-8,lsy-2,mdl-1,nfya-1,nhr-20,nhr-71,pag-3,rnt-1,sma-9,snu-23,swsn-7,unc-130,unc-55,xbp-1
chrI	5024082	5024233	False	False	.	.	cold	3	elt-2,fos-1,nhr-80
chrI	5025204	5025355	True	False	I1	stable	cold	6	daf-16,elt-2,fos-1,nhr-80,pha-4,pqm-1
chrI	5025474	5025625	True	False	.	.	HOT	33	C16A3.4,C34F6.9,F13H6.1,blmp-1,ceh-28,dpl-1,dve-1,efl-1,elt-1,elt-2,elt-3,eor-1,hlh-30,hmg-11,irx-1,lsy-2,mdl-1,nhr-20,nhr-23,nhr-25,nhr-47,nhr-48,nhr-71,nhr-80,nhr-85,nhr-90,pha-4,sem-4,sma-3,sma-9,snu-23,xbp-1,ztf-26
chrI	5027633	5027784	False	False	.	.	none	0	.
chrI	5028014	5028165	True	True	I2	I	cold	5	elt-2,fos-1,nhr-80,pqm-1,zip-8
chrI	5028272	5028423	False	False	.	.	cold	1	nhr-80
chrI	5031112	5031263	True	False	.	.	cold	13	atf-7,cebp-1,daf-16,dve-1,elt-2,fos-1,hlh-30,madf-10,nhr-48,nhr-80,nhr-90,pqm-1,sma-9
chrI	5032999	5033150	True	True	.	.	none	0	.
chrI	5033362	5033513	True	False	.	.	HOT	27	F13H6.1,atf-7,cebp-1,crh-2,daf-16,dve-1,elt-2,eor-1,fos-1,hif-1,hlh-30,jun-1,let-607,lsy-2,madf-10,mdl-1,nhr-102,nhr-20,nhr-48,nhr-71,nhr-80,nhr-90,pha-4,pqm-1,sma-3,sma-9,snu-23
chrI	5034111	5034262	True	False	.	.	cold	1	sma-3
chrI	5034435	5034586	True	False	.	.	cold	10	cebp-1,daf-16,dve-1,elt-2,nhr-20,nhr-71,nhr-80,nhr-85,pqm-1,snu-23
chrI	5035086	5035237	False	False	.	.	none	0	.
chrI	5035681	5035832	True	False	Mix3	stable	cold	15	cebp-1,crh-2,daf-16,dve-1,elt-2,eor-1,fos-1,hif-1,madf-10,nhr-80,nhr-90,pha-4,pqm-1,sma-3,sma-9
chrI	5036619	5036770	False	False	.	.	none	0	.
chrI	5037041	5037192	True	False	.	.	cold	1	pha-4
chrI	5037351	5037502	True	False	.	.	HOT	19	atf-7,cebp-1,crh-2,daf-16,dve-1,elt-2,fos-1,hif-1,hlh-30,jun-1,let-607,madf-10,mdl-1,nhr-102,nhr-48,nhr-80,pha-4,pqm-1,sma-9
chrI	5038305	5038456	False	False	.	.	none	0	.
chrI	5049384	5049535	True	False	Mix8	stable	cold	1	pha-4
chrI	5049937	5050088	True	False	I2	stable	cold	6	daf-16,elt-2,fos-1,nhr-80,pqm-1,skn-1
chrI	5055432	5055583	True	False	Mix6	stable	cold	1	ces-1
chrI	5056997	5057148	True	False	Mix1	stable	cold	16	C34F6.9,F13H6.1,ceh-18,ces-1,eor-1,fkh-10,fkh-8,hlh-30,lin-35,nhr-47,nhr-71,rbr-2,snu-23,unc-42,unc-55,unc-86
chrI	5057447	5057598	False	True	stable	I+H [2]	cold	6	dve-1,elt-2,hlh-1,nhr-80,pqm-1,unc-55
chrI	5062154	5062305	True	False	.	.	cold	3	ceh-18,efl-1,rnt-1
[truncated: 40,246 more rows]
