# Supplementary figures and images for: Chromatin accessibility dynamics across C. elegans development and ageing
Source: eLife journal article supplement (doi:10.7554/elife.37344), 2018-10-26

Figure 2 - figure supplement 2

A

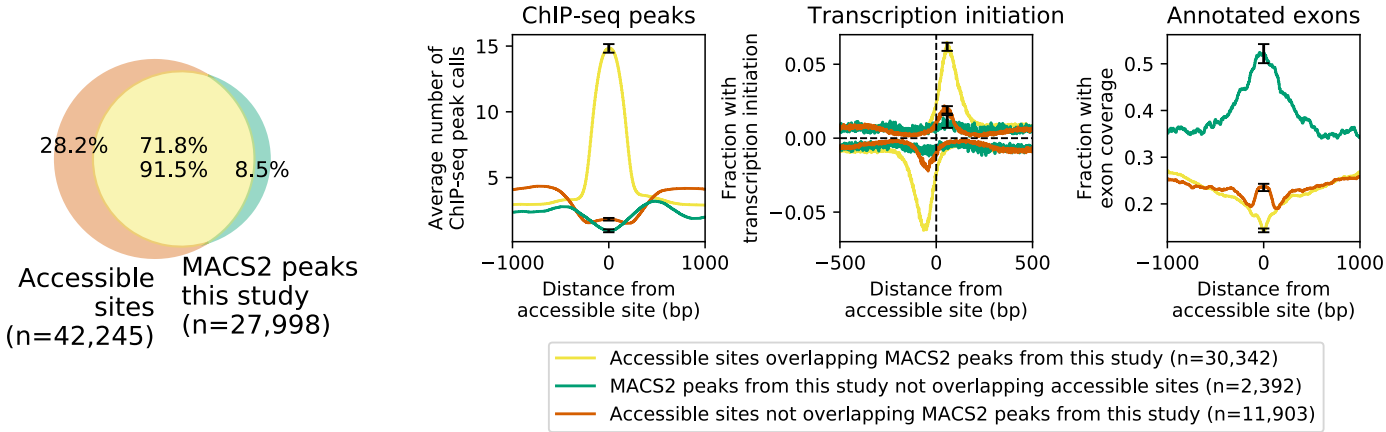

B

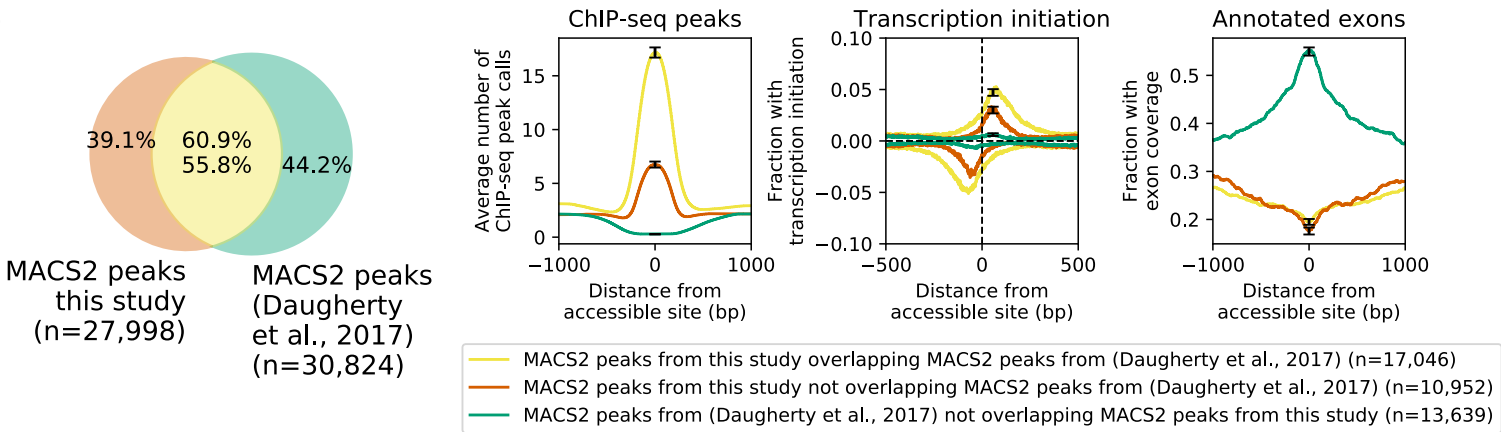

C

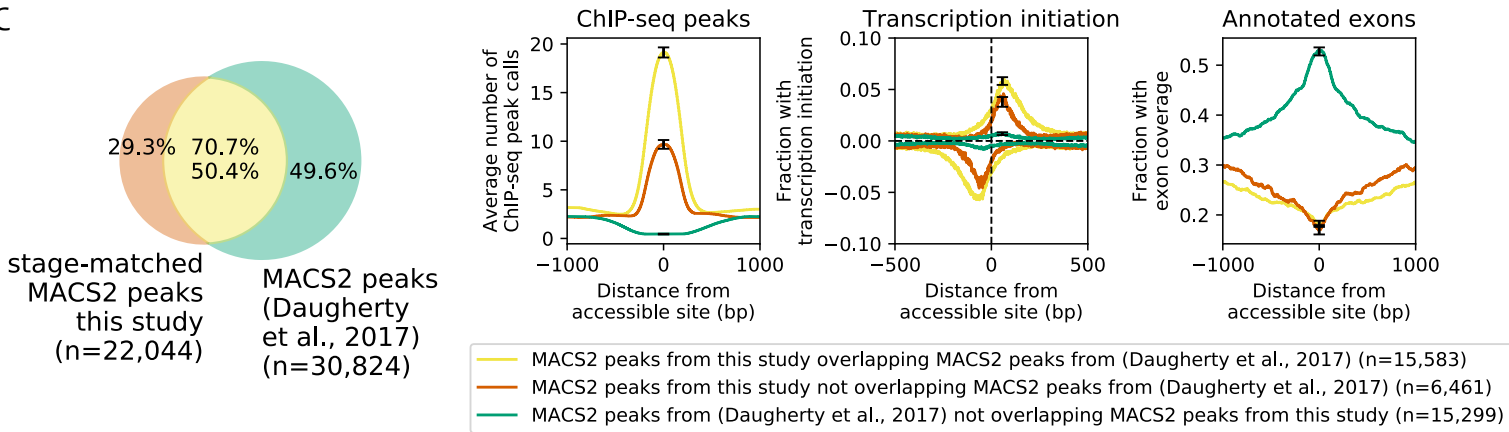

Supplement: supp [file elife-37344-supp-v1.zip]

Figure 1 - figure supplement 1

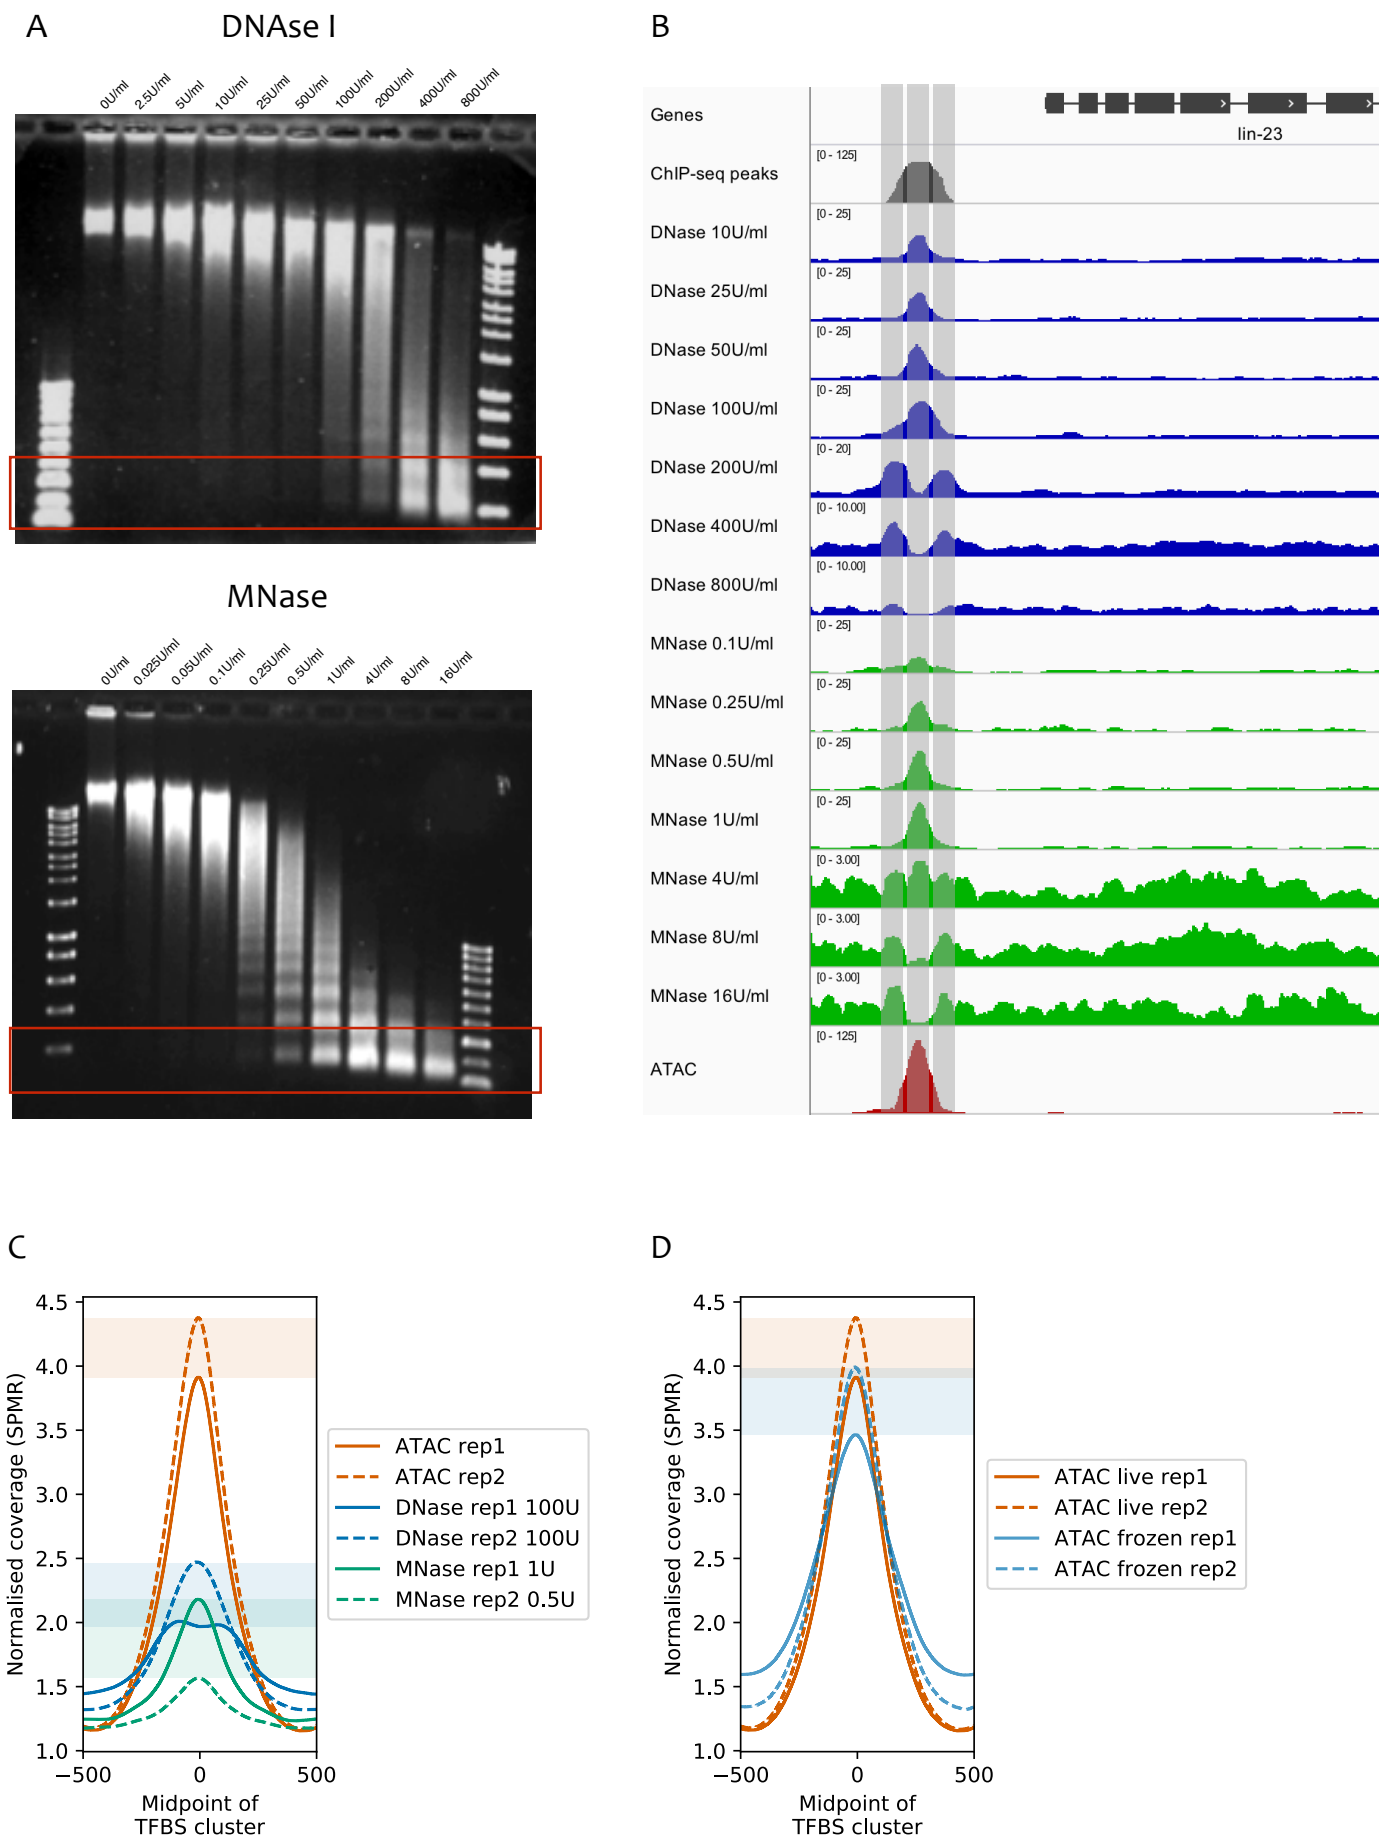

Supplement: supp [file elife-37344-supp-v1.zip]

Figure 1 - figure supplement 3

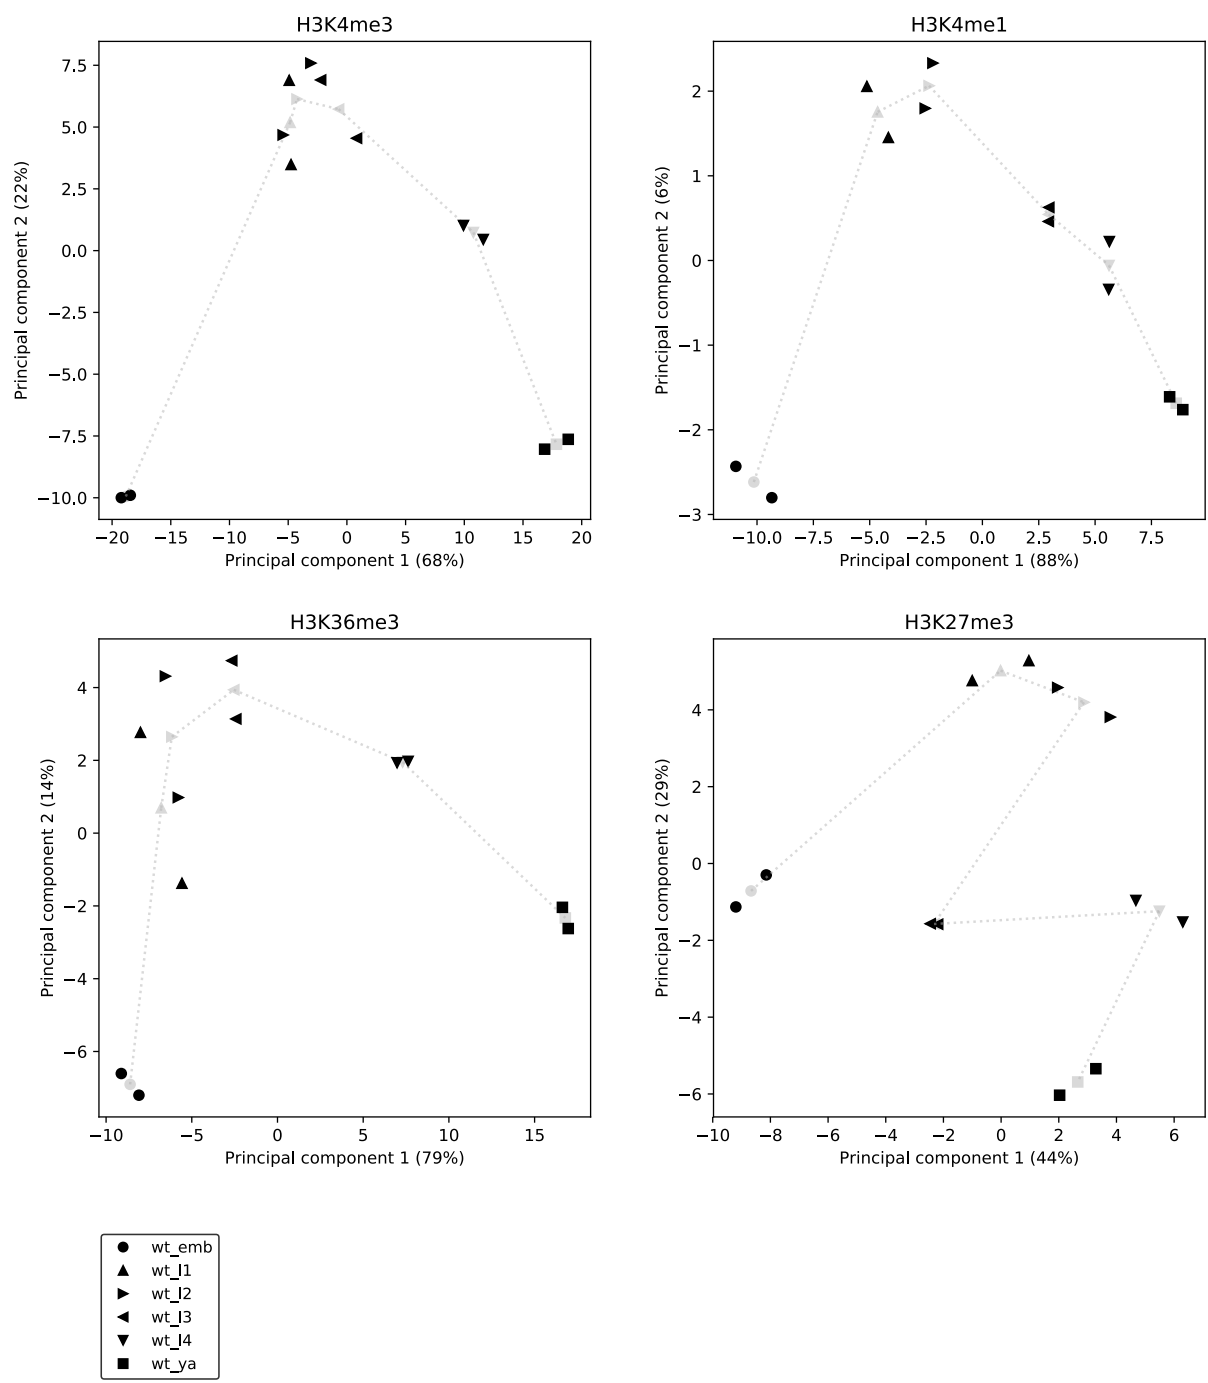

Supplement: supp [file elife-37344-supp-v1.zip]

Figure 2—figure supplement 3

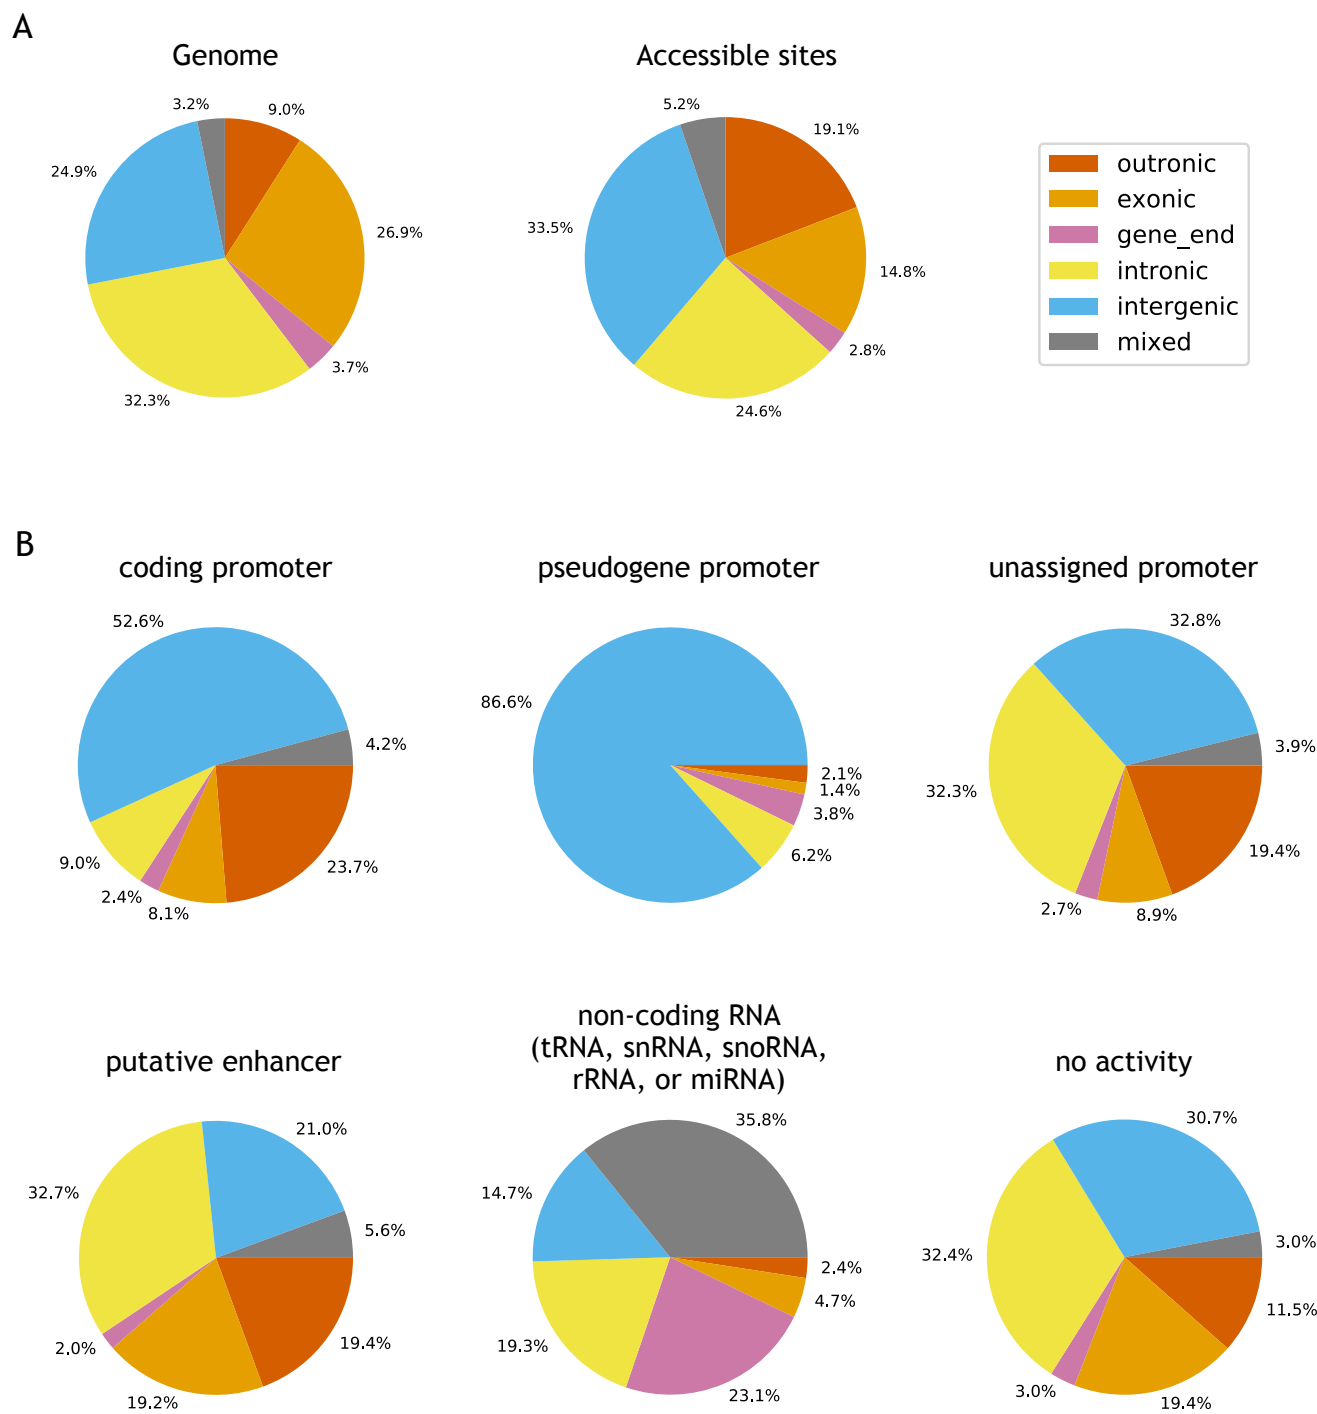

Supplement: supp [file elife-37344-supp-v1.zip]

Figure 3—figure supplement 1

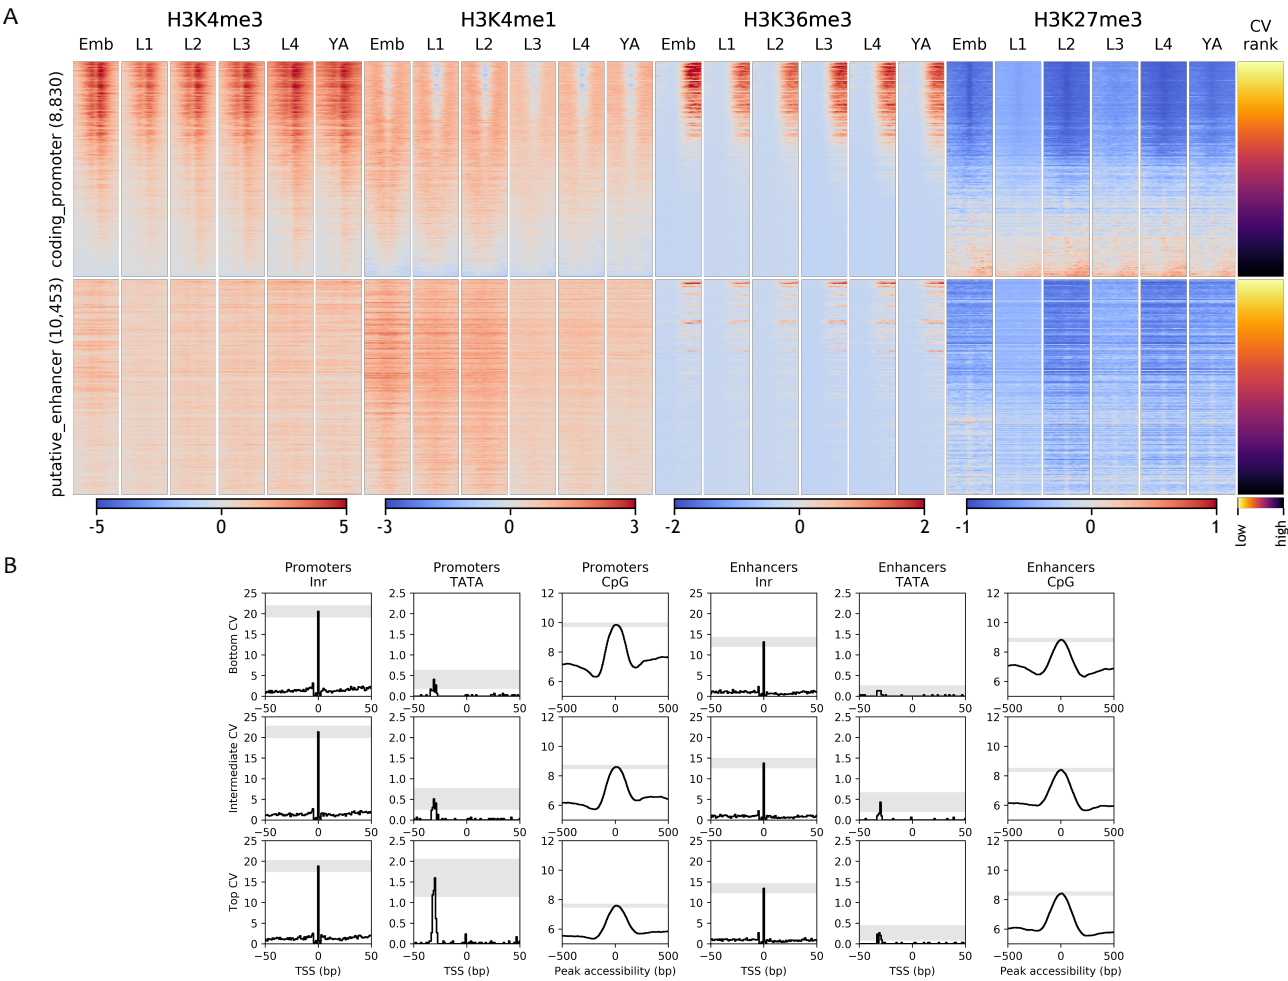

Supplement: supp [file elife-37344-supp-v1.zip]

Figure 1 - figure supplement 2

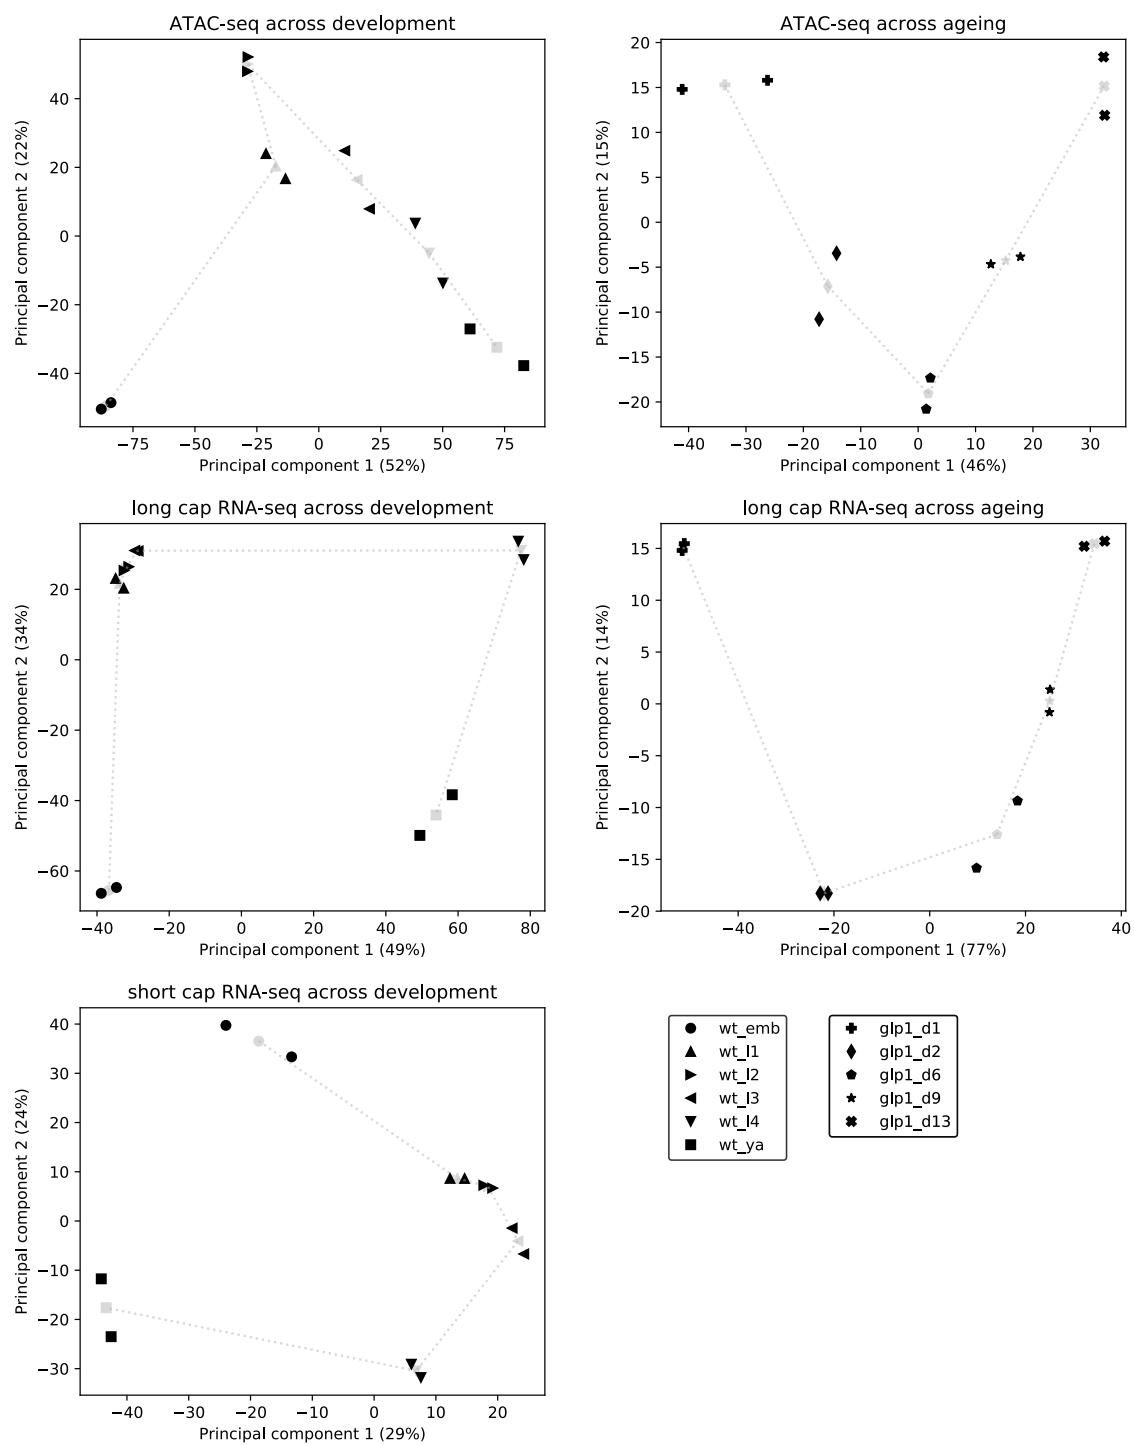

Supplement: supp [file elife-37344-supp-v1.zip]

Figure 2—figure supplement 4

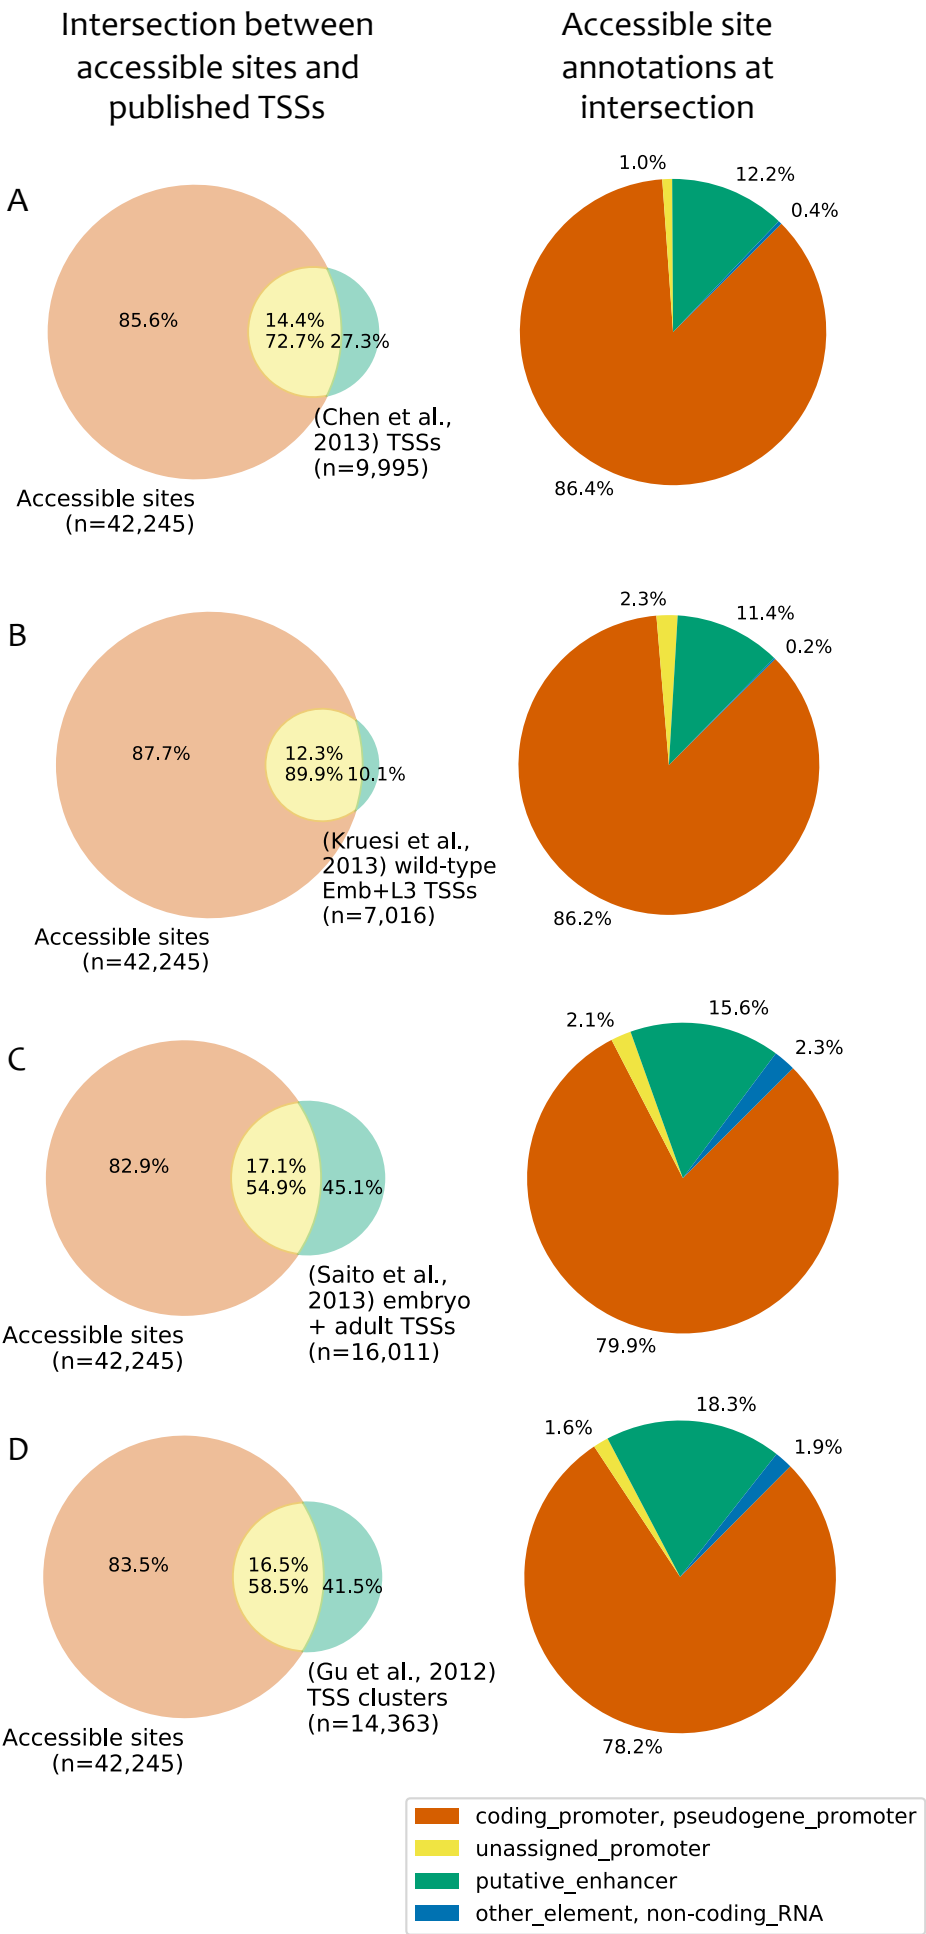

Supplement: supp [file elife-37344-supp-v1.zip]

Figure 2 - figure supplement 1

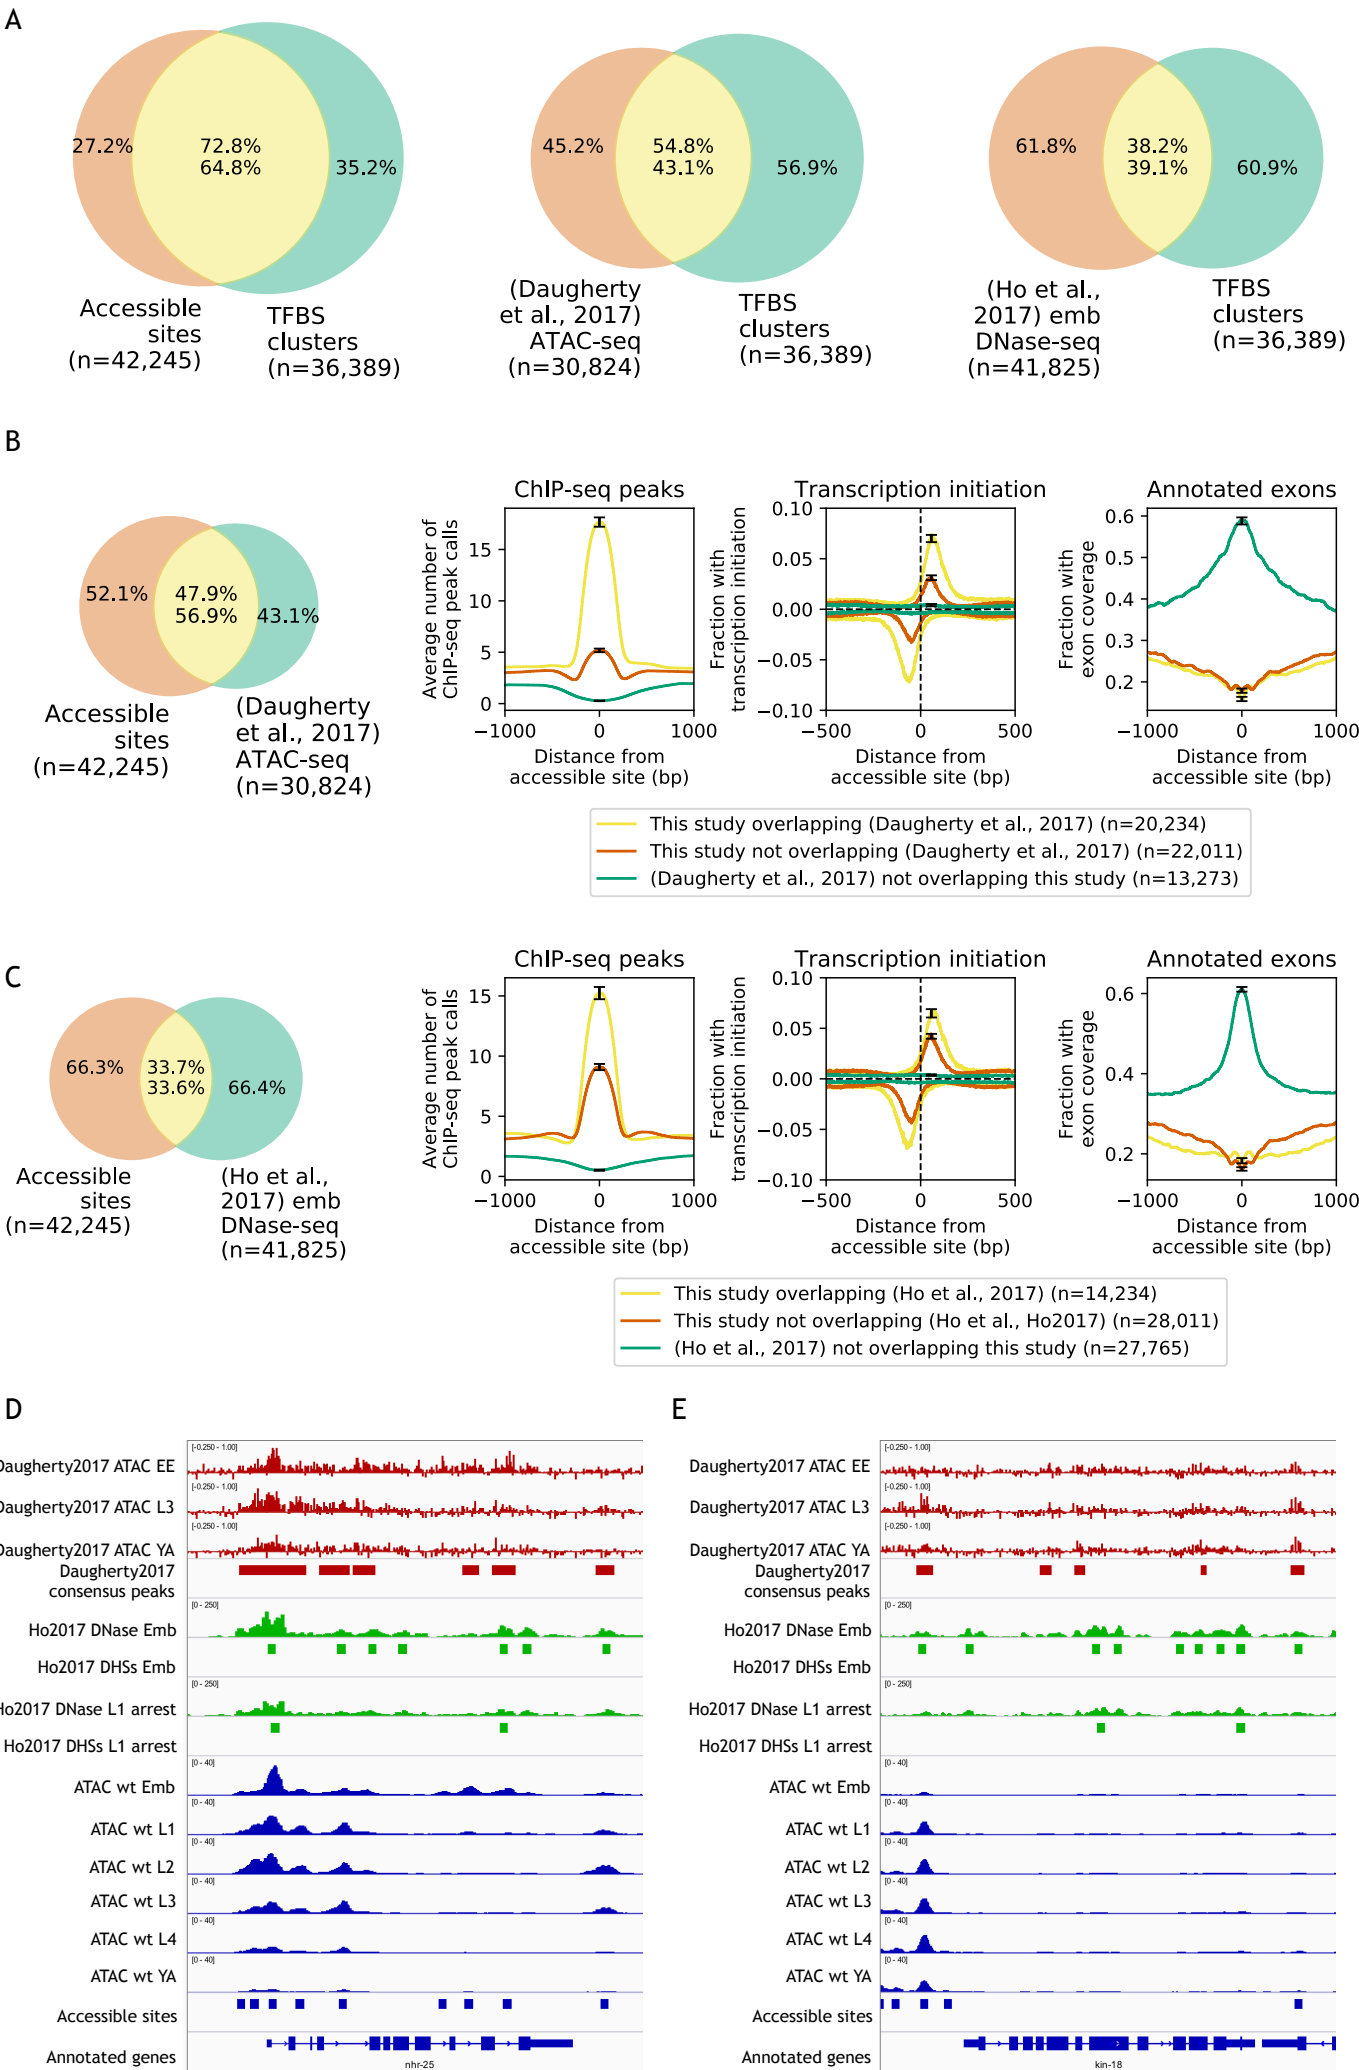

Supplement: supp [file elife-37344-supp-v1.zip]

Figure 4 - figure supplement 3

Ageing promoter clusters

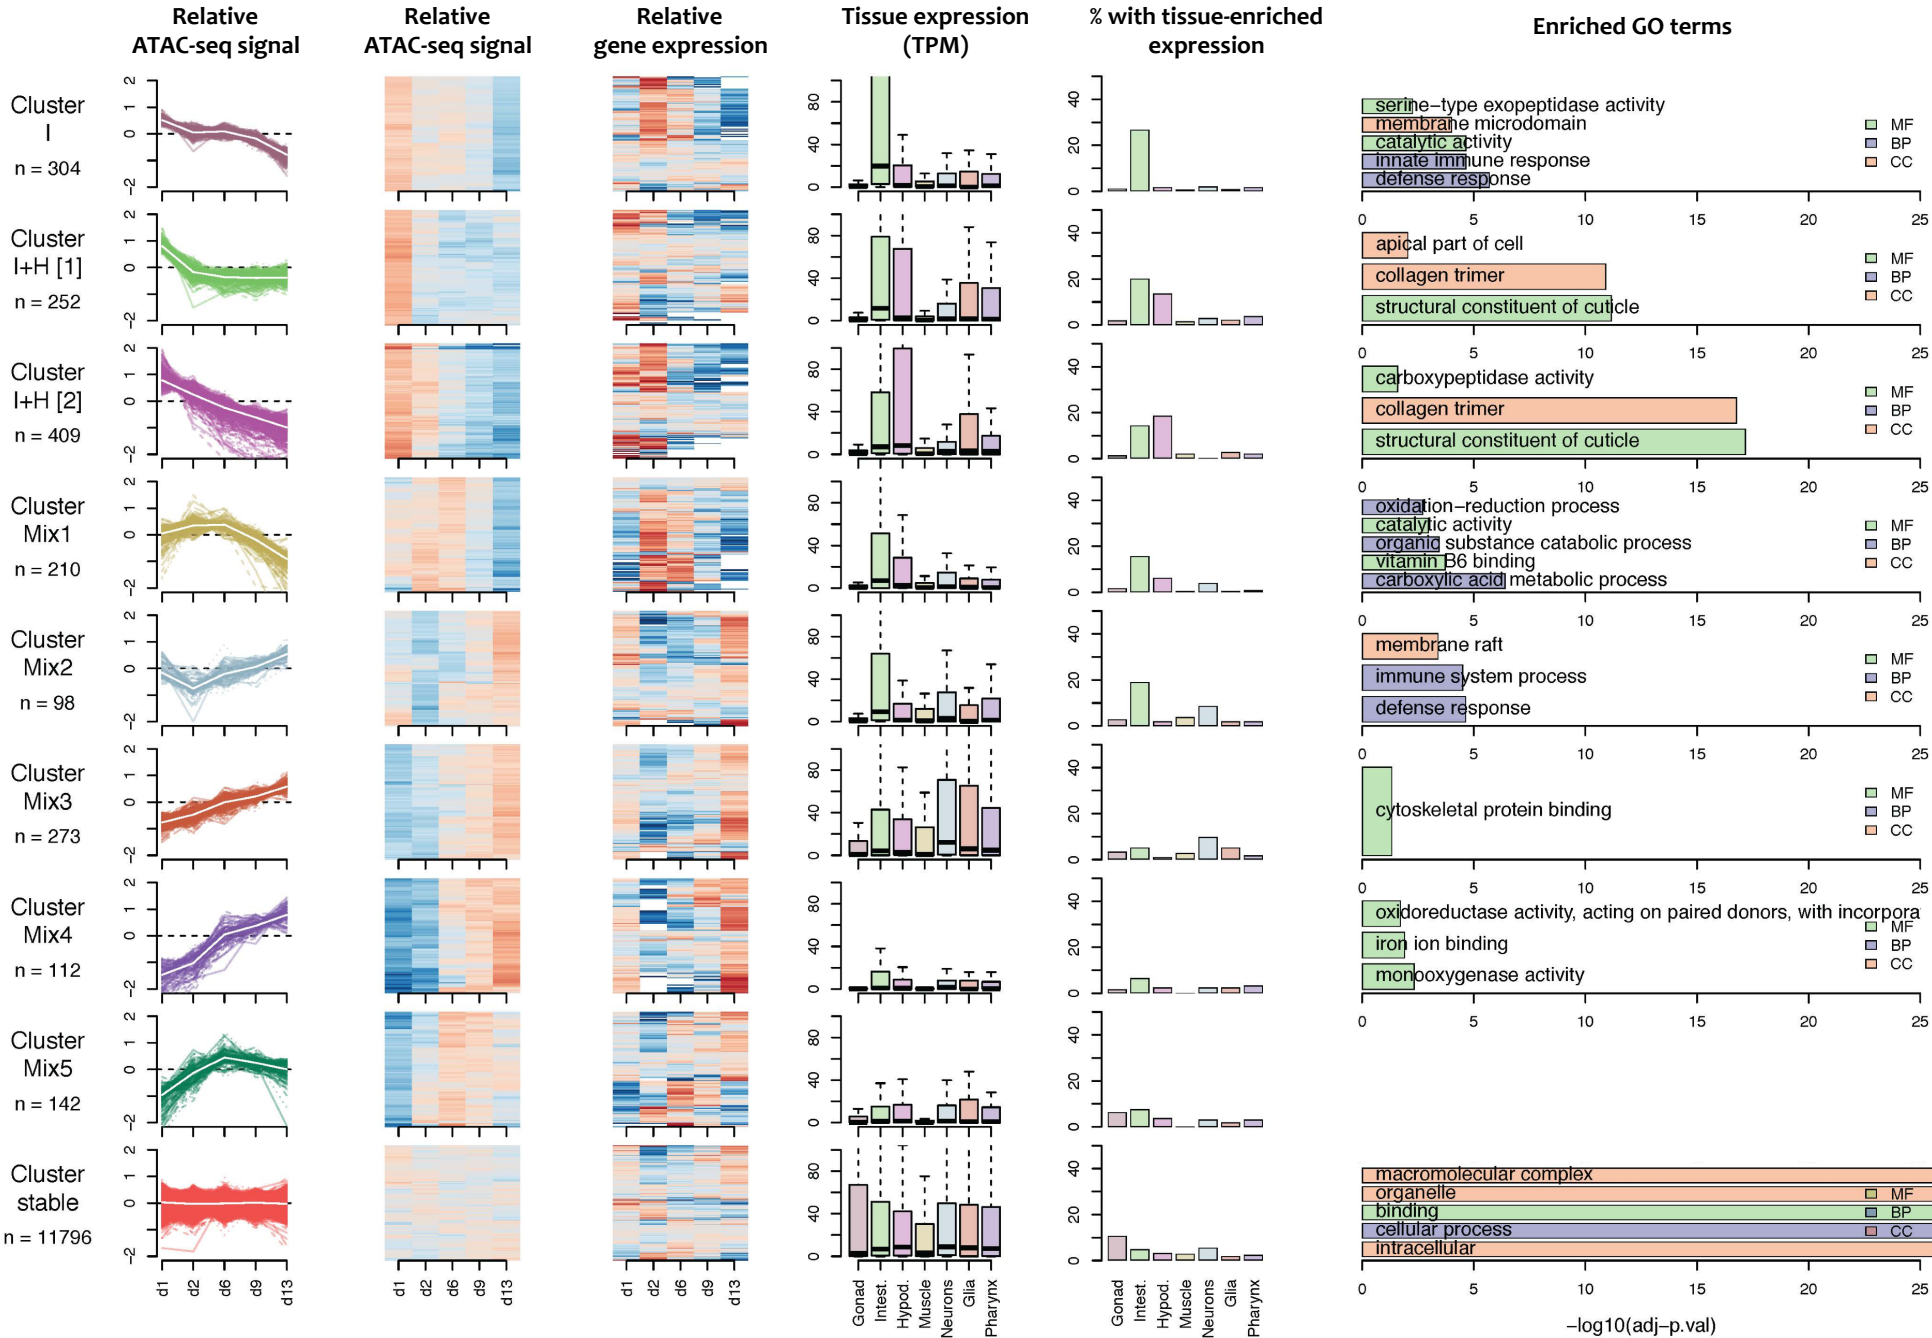

Supplement: supp [file elife-37344-supp-v1.zip]

## Developmental promoter clusters - (continued from Figure 4 - figure supplement 1)

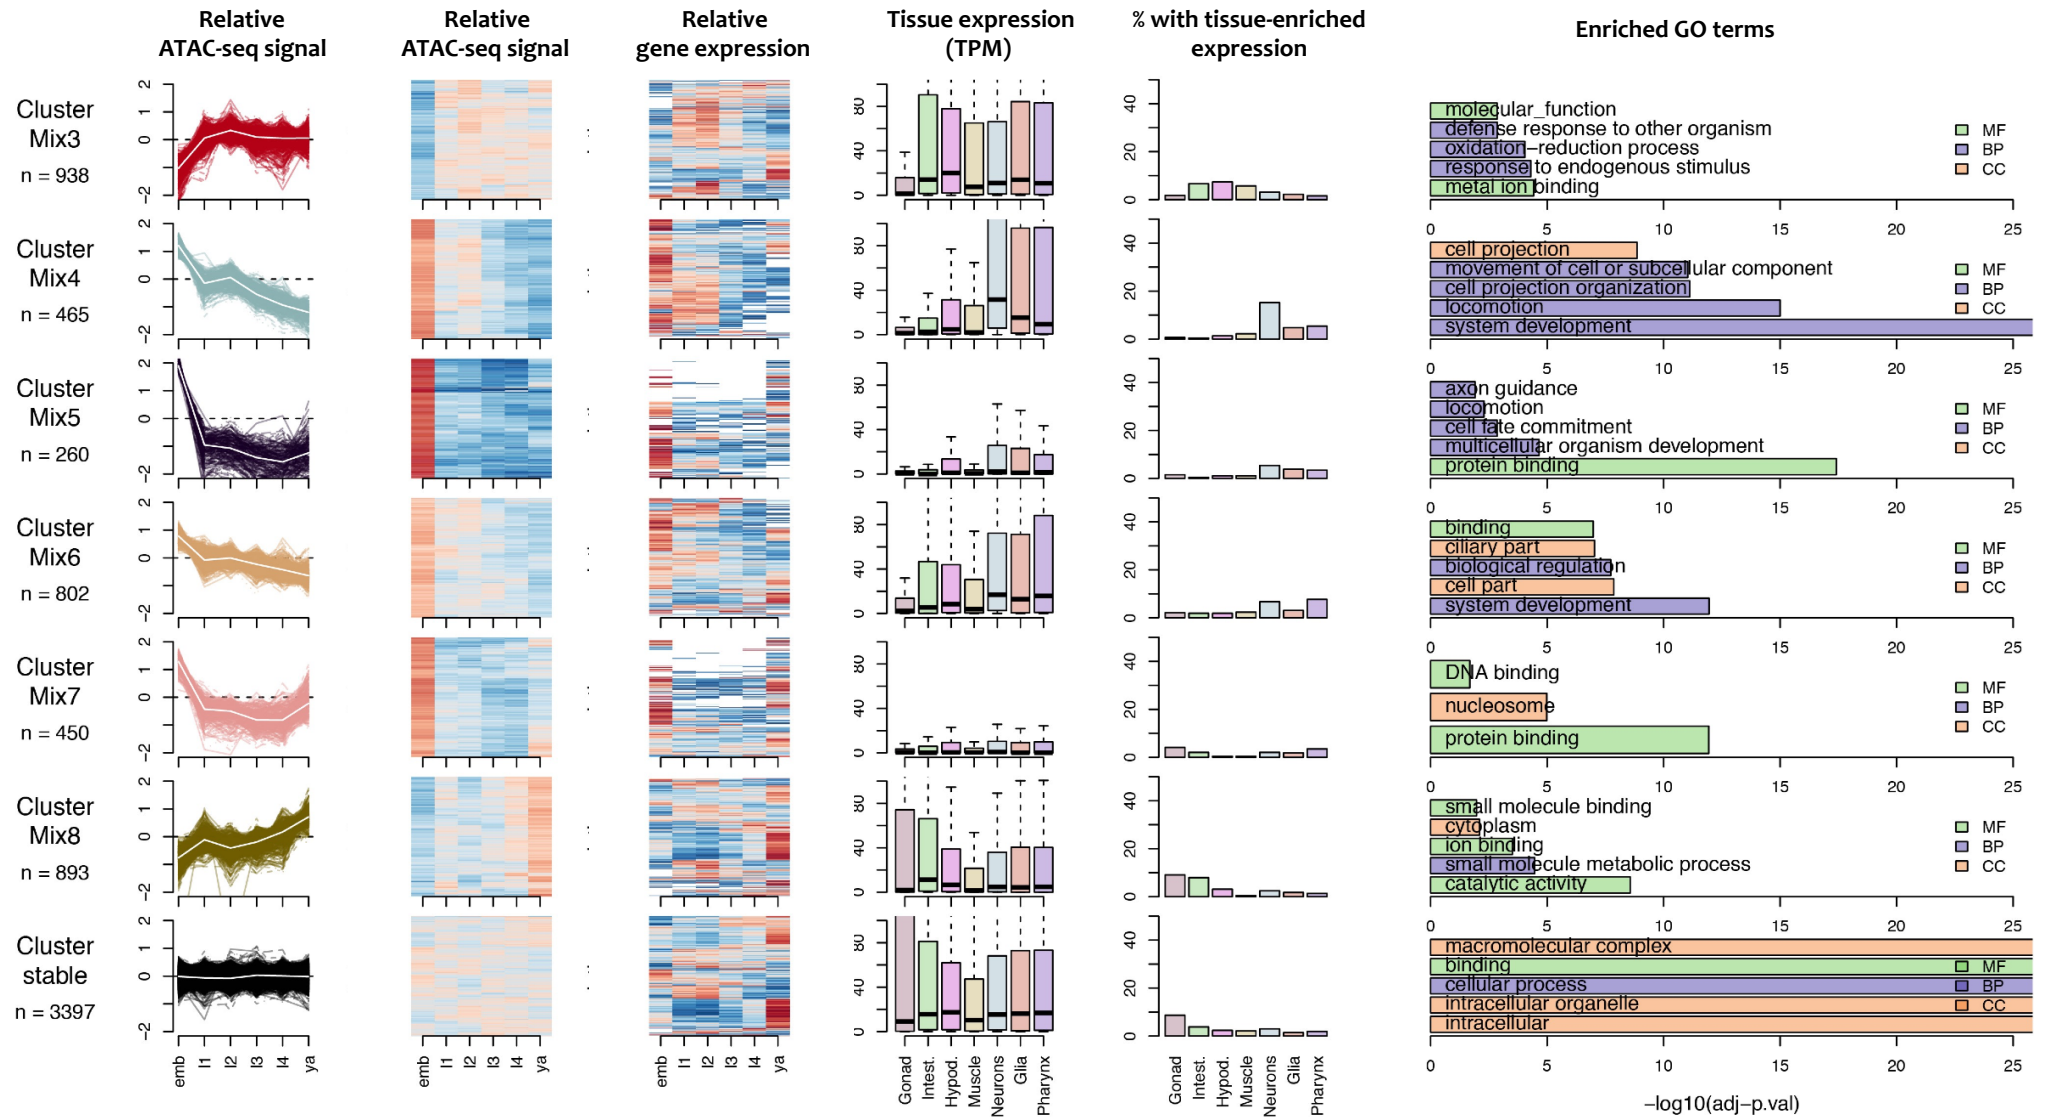

Supplement: supp [file elife-37344-supp-v1.zip › elife_poa_e37344_Figure_4_figure_supplement_2.pdf]
